# Supplementary material for: Phenotyping Reveals Targets of a Pseudo‐Natural‐Product Autophagy Inhibitor
Source: PubMed Central journal article supplement (PMC7383971; doi:10.1002/anie.202000364), 2020-04-21
Supplement: ANIE-59-12470-s001.pdf [file ANIE-59-12470-s001.pdf]

## Supporting Information

### **Phenotyping Reveals Targets of a Pseudo-Natural-Product Autophagy Inhibitor**

*Daniel J. Foley, Sarah Zinken, Dale Corkery, Luca Laraia, Axel Pahl, Yao-Wen Wu, and Herbert Waldmann\**

anie\_202000364\_sm\_miscellaneous\_information.pdf

anie\_202000364\_sm\_movie\_10w-j.avi

anie\_202000364\_sm\_movie\_VEH.avi

## Supporting Information

### Contents:

|            |                                                                                                                    |           |
|------------|--------------------------------------------------------------------------------------------------------------------|-----------|
| <b>1.0</b> | <b>Supporting Figures</b> .....                                                                                    | <b>3</b>  |
| 1.1        | Substructure search in the Dictionary of Natural Products .....                                                    | 3         |
| 1.2        | Molecular properties of the indocinchona alkaloids .....                                                           | 3         |
| 1.3        | SAR analysis and determination of the minimum required pharmacophore for azaquindole activity .....                | 4         |
| 1.4        | Additional compounds tested for activity in the autophagy assay .....                                              | 5         |
| 1.5        | LC3 lipidation in starved cells treated with azaquindole-1 .....                                                   | 6         |
| 1.6        | ULK1 phosphorylation in starved cells treated with azaquindole-1 .....                                             | 6         |
| <b>2.0</b> | <b>Supporting Tables</b> .....                                                                                     | <b>7</b>  |
| 2.1        | Synthetic yields and autophagy inhibition IC <sub>50</sub> values for Cinchona alkaloid-derived 7-azaindoles ..... | 7         |
| 2.2        | Activity data for indole-containing natural products screened in the autophagy assay .....                         | 9         |
| 2.3        | Kinases showing <i>in vitro</i> inhibition below 10 μM by azaquindole-1 .....                                      | 14        |
| 2.4        | Investigation of selective kinase inhibitors in the autophagy assay .....                                          | 15        |
| 2.5        | <i>In vitro</i> IC <sub>50</sub> measurements for azaquindoles and related structures against VPS34 .....          | 16        |
| <b>3.0</b> | <b>Pd-catalysed indole formations: substrate scope summary</b> .....                                               | <b>17</b> |
| 3.1        | Substrate scope experiments: successful reactions .....                                                            | 17        |
| 3.2        | Substrate scope experiments: failed reactions .....                                                                | 19        |
| 3.3        | SAR investigations: successful reactions .....                                                                     | 21        |
| 3.4        | SAR investigations: failed reactions .....                                                                         | 23        |
| <b>4.0</b> | <b>Computational analysis</b> .....                                                                                | <b>25</b> |
| 4.1        | Compounds in the analysis .....                                                                                    | 25        |
| 4.2        | NP-likeness scoring .....                                                                                          | 28        |
| 4.3        | Molecular properties analysis .....                                                                                | 28        |
| 4.4        | Novelty assessment .....                                                                                           | 29        |
| <b>5.0</b> | <b>Biological experimental</b> .....                                                                               | <b>32</b> |
| 5.1        | Cell culture for the autophagy assay .....                                                                         | 32        |
| 5.2        | High-content screening for autophagy inhibitors .....                                                              | 32        |
| 5.3        | Cell painting assay .....                                                                                          | 33        |
| 5.3.1      | Discussion of the Induction Parameter .....                                                                        | 36        |
| 5.3.2      | Availability of the cell painting assay code .....                                                                 | 37        |
| 5.3.3      | Further discussion and interpretation of the cell painting data .....                                              | 37        |
| 5.3.4      | Comparison of azaquindole-1 with other recently identified autophagy inhibitors .....                              | 38        |
| 5.4        | β-Adrenergic receptor screening .....                                                                              | 40        |

|            |                                                                                  |            |
|------------|----------------------------------------------------------------------------------|------------|
| 5.5        | Kinase panel data.....                                                           | 41         |
| 5.6        | Immunoblotting.....                                                              | 51         |
| 5.7        | Live-cell microscopy.....                                                        | 51         |
| 5.8        | Cellular thermal shift assay (CETSA) in cell lysate.....                         | 52         |
| 5.9        | VPS34 kinetic experiments.....                                                   | 53         |
| 5.9.1      | Experimental protocol.....                                                       | 53         |
| 5.9.2      | Michaelis–Menten Saturation Curves.....                                          | 54         |
| 5.9.3      | %inhibition versus [10w-j] plot.....                                             | 54         |
| 5.9.4      | Lineweaver–Burk Plot.....                                                        | 55         |
| <b>6.0</b> | <b>Synthetic experimental.....</b>                                               | <b>56</b>  |
| 6.1        | General experimental.....                                                        | 56         |
| 6.2        | General procedures.....                                                          | 57         |
| 6.3        | Compound data.....                                                               | 59         |
| 6.3.1      | Preparation of the Cinchona alkaloid derived ketones.....                        | 59         |
| 6.3.2      | Preparation of the Cinchona alkaloid derived indoles.....                        | 64         |
| 6.3.2.1    | Preparation of the quinidine-derived indoles.....                                | 65         |
| 6.3.2.2    | Preparation of the quinidine-derived azaindoles.....                             | 85         |
| 6.3.2.3    | Preparation of the quinine-derived indoles.....                                  | 90         |
| 6.3.2.4    | Preparation of the quinine-derived azaindoles.....                               | 112        |
| 6.3.2.5    | Preparation of compounds to investigate the minimum necessary pharmacophore..... | 127        |
| 6.3.2.5.1  | Preparation of compound S-1.....                                                 | 127        |
| 6.3.2.5.2  | Preparation of compound S-2.....                                                 | 128        |
| 6.3.2.5.3  | Preparation of compounds S-3 and S-4.....                                        | 132        |
| 6.3.2.5.4  | Preparation of compound S-5.....                                                 | 139        |
| 6.3.2.5.5  | Preparation of compound S-6.....                                                 | 146        |
| <b>7.0</b> | <b>Processed NMR Spectra.....</b>                                                | <b>147</b> |
| <b>8.0</b> | <b>References.....</b>                                                           | <b>320</b> |

## 1.0 Supporting Figures

### 1.1 Substructure search in the Dictionary of Natural Products

The following substructures were investigated in the Dictionary of Natural Products (<http://dnp.chemnetbase.com>, accessed 28/05/2018, Figure S1):

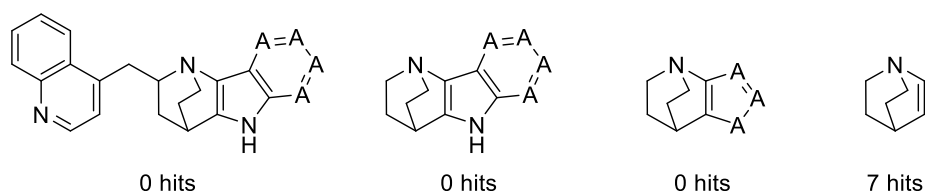

**Figure S1** Substructure searches within the Dictionary of Natural Products. A = any atom.

### 1.2 Molecular properties of the indocinchona alkaloids

The indocinchona alkaloids have the following AlogP vs MW distribution (Figure S2).

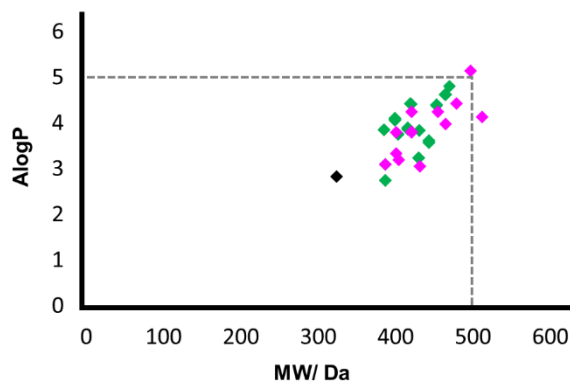

**Figure S2** Molecular properties of the indocinchona alkaloids. Indocinchona alkaloids – compounds **9a-w** and **10a-v** (green); azaquinolones – compounds **10w-l** (pink); quinidine/quinine (black).

See Section 4.3 for further molecular property analyses.

### 1.3 SAR analysis and determination of the minimum required pharmacophore for azaquindole activity

The following compounds (Figure S3) were prepared to explore the structure-activity relationship (SAR) around azaquindole-1 (compound **10w-j**):

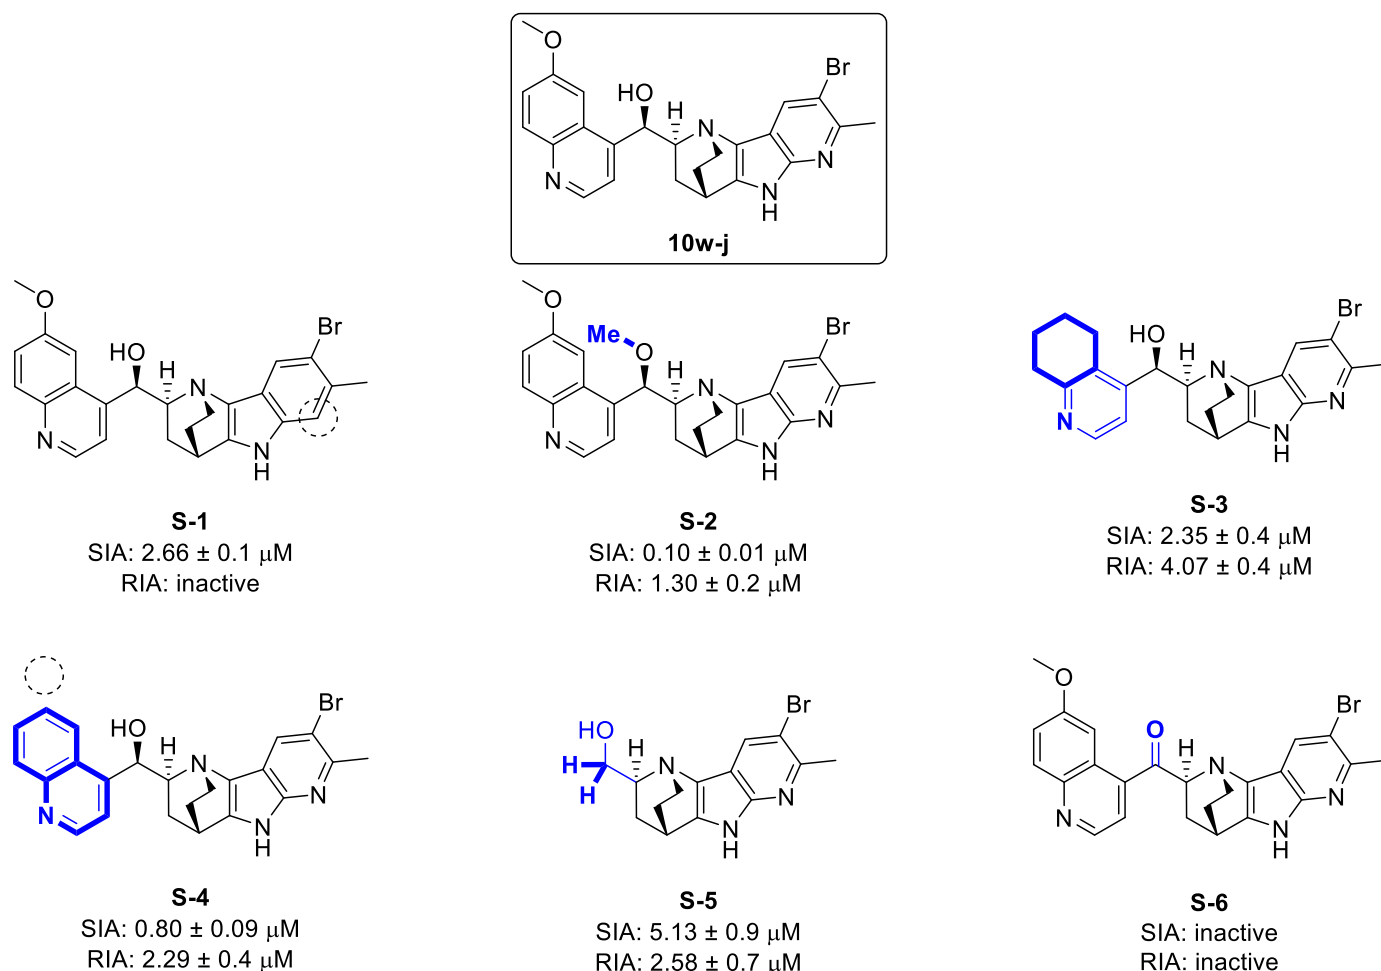

**Figure S3** A Summary of the SAR explored for azaquindole-1.  
SIA = starvation-induced autophagy. RIA= rapamycin-induced autophagy.

On the basis of the data above (Figure S3), we surmised that the following structural features were important for autophagy inhibition by indocinchona alkaloids (Figure S4):

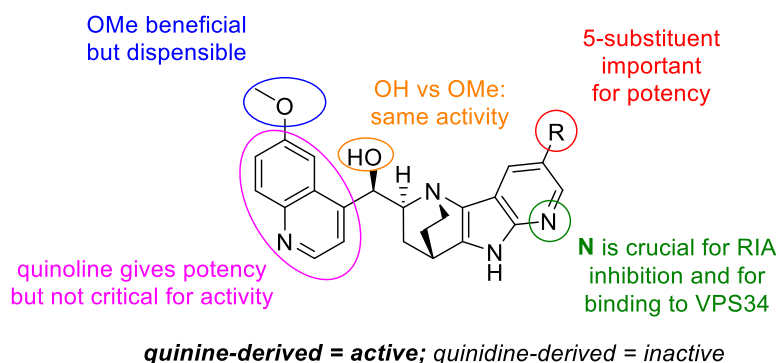

**Figure S4** A Summary of the key features required for autophagy inhibition. RIA= rapamycin-induced autophagy.

## 1.4 Additional compounds tested for activity in the autophagy assay

The following compounds, which were closely related to the lead compound **10w-j**, were investigated for activity in the autophagy assay and were found to be inactive at  $\leq 10 \mu\text{M}$  (Figure S5):

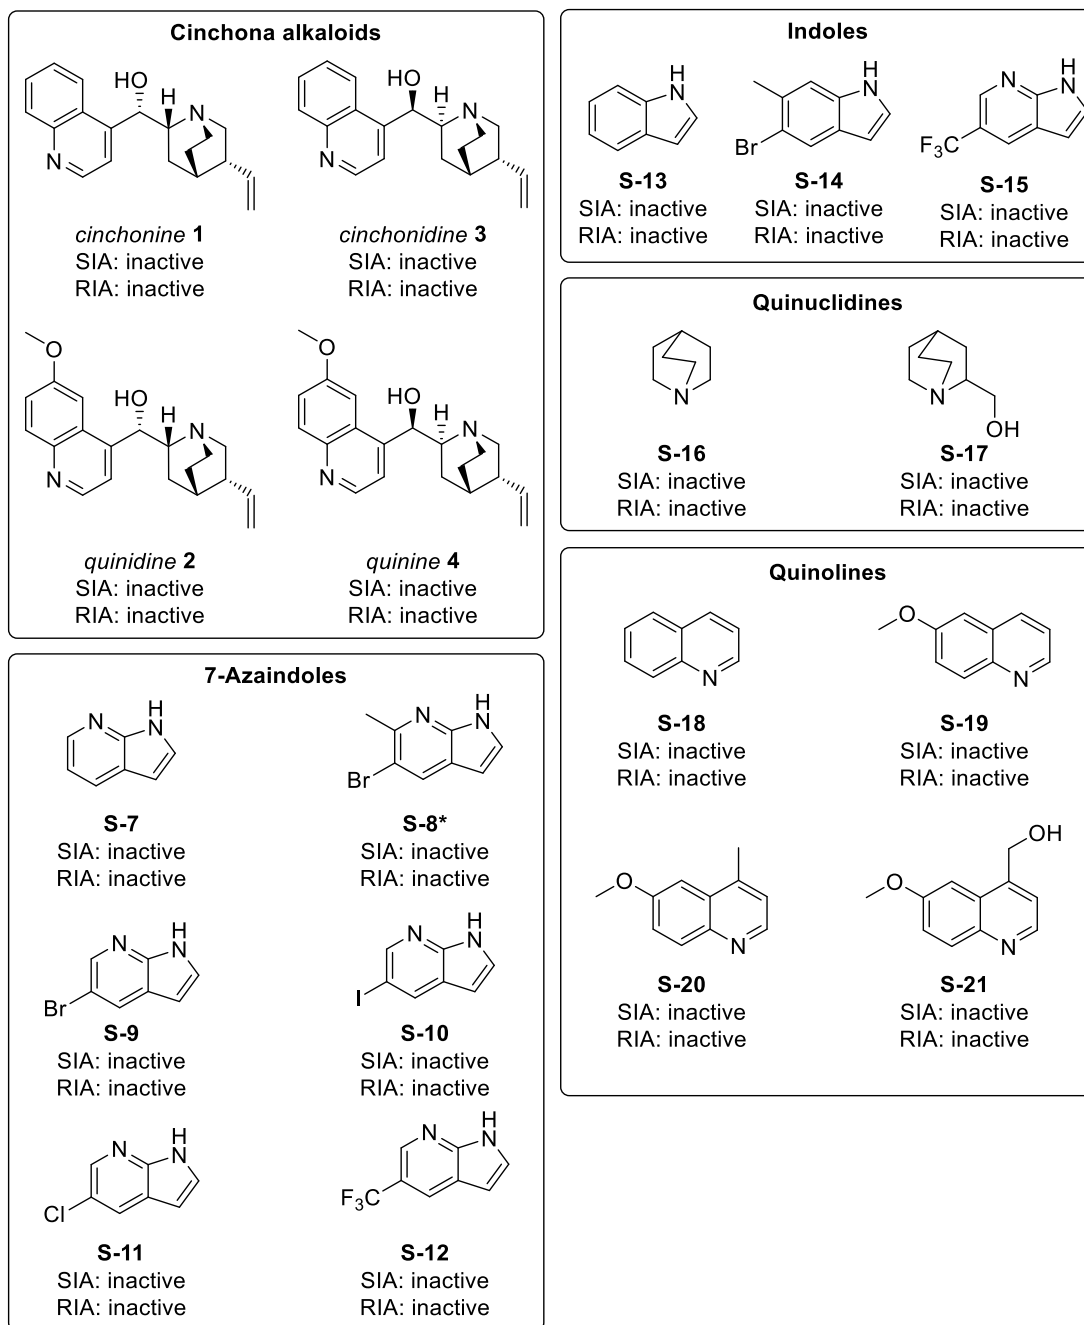

**Figure S5** Several compounds that closely relate to the azaquinolines **10w** were found to be inactive in the autophagy assay. SIA = starvation-induced autophagy. RIA= rapamycin-induced autophagy.

\*Compound **S-8** was found to inhibit hedgehog-induced osteogenesis in a cell-based assay,<sup>[1]</sup> with  $\text{IC}_{50} = 1.83 \pm 0.44 \mu\text{M}$  (the assay serves as a proxy for identifying inhibitors of the hedgehog signalling pathway – for more details see Ref. [1], Fig. 1).

Overall, new bioactivity (autophagy inhibition) was realised through the combination of azaquinolines with the quinone framework (n.b. azaquinolines **10w** were found to be inactive in the hedgehog-induced osteogenesis assay). None of the fragments above were found to be active in the cell painting assay.

### 1.5 LC3 lipidation in starved cells treated with azaquindole-1

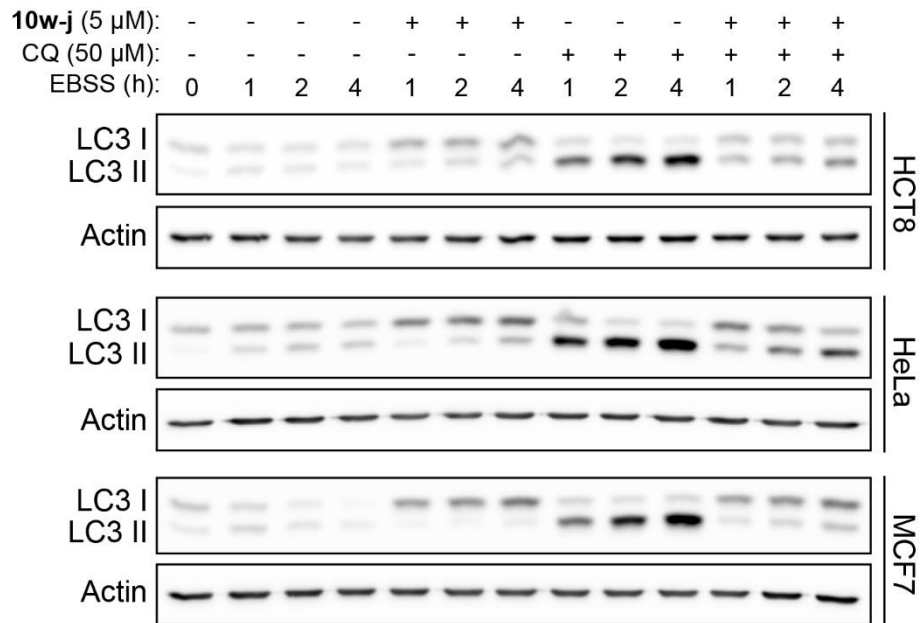

**Figure S6** LC3 lipidation in cells (HCT8; HeLa; MCF7) undergoing starvation in the presence or absence of **10w-j** or chloroquine (CQ) as indicated.

### 1.6 ULK1 phosphorylation in starved cells treated with azaquindole-1

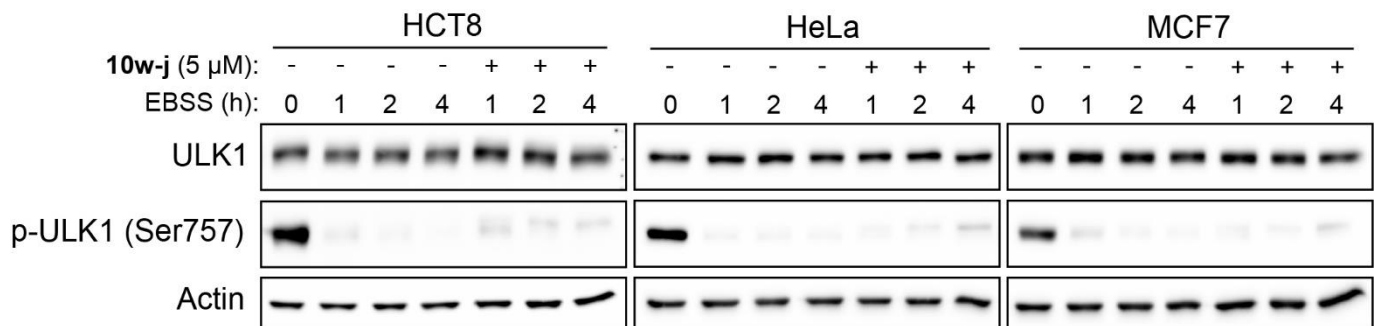

**Figure S7** ULK1 phosphorylation in cells (HCT8; HeLa; MCF7) undergoing starvation in the presence or absence of **10w-j**, as indicated.

## 2.0 Supporting Tables

### 2.1 Synthetic yields and autophagy inhibition IC<sub>50</sub> values for Cinchona alkaloid-derived 7-azaindoles

Synthetic yields and autophagy IC<sub>50</sub> values for the 7-azaindoles **9w** and **10w** (Table S1):

| Entry | Functionalised at indole position... | R =                                    | From quinidine |          |                                               |                                              |            | From quinine |          |                                               |                                              |                |
|-------|--------------------------------------|----------------------------------------|----------------|----------|-----------------------------------------------|----------------------------------------------|------------|--------------|----------|-----------------------------------------------|----------------------------------------------|----------------|
|       |                                      |                                        | Nr             | Yield /% | Starvation-induced IC <sub>50</sub> / $\mu$ M | Rapamycin-induced IC <sub>50</sub> / $\mu$ M | Notes      | Nr           | Yield /% | Starvation-induced IC <sub>50</sub> / $\mu$ M | Rapamycin-induced IC <sub>50</sub> / $\mu$ M | Notes          |
| 1     | n/a                                  | n/a                                    | <b>9w</b>      | 17       | n/a                                           | nd                                           | <i>d</i>   | <b>10w</b>   | 13       | 4.33 $\pm$ 1.7                                | 4.95 $\pm$ 0.7                               | <i>a,e</i>     |
| 2     | <b>4-R-7-azaindole</b>               | Cl                                     | –              | –        | –                                             | –                                            |            | <b>10w-a</b> | 19       | 0.52 $\pm$ 0.20                               | 0.65 $\pm$ 0.35                              | <i>a,d,g</i>   |
| 3     | <b>5-R-7-azaindole</b>               | Me                                     | <b>9w-b</b>    | 51       | n/a                                           | n/a                                          | <i>a</i>   | <b>10w-b</b> | 30       | 0.31 $\pm$ 0.09                               | 0.86 $\pm$ 0.26                              | <i>a</i>       |
| 4     | <b>5-R-7-azaindole</b>               | 4-Cl-(C <sub>6</sub> H <sub>5</sub> )- | –              | –        | –                                             | –                                            |            | <b>10w-c</b> | 33       | 9.00 $\pm$ 1.1                                | n/a                                          | <i>e,h</i>     |
| 5     | <b>5-R-7-azaindole</b>               | CF <sub>3</sub>                        | –              | –        | –                                             | –                                            |            | <b>10w-d</b> | 24       | 0.12 $\pm$ 0.03                               | 0.77 $\pm$ 0.29                              | <i>e,g,h</i>   |
| 6     | <b>5-R-7-azaindole</b>               | NO <sub>2</sub>                        | –              | –        | –                                             | –                                            |            | <b>10w-e</b> | 10       | 0.67 $\pm$ 0.13                               | 1.26 $\pm$ 0.20                              | <i>a,d,g</i>   |
| 7     | <b>5-R-7-azaindole</b>               | F                                      | <b>9w-f</b>    | 38       | n/a                                           | n/a                                          | <i>a</i>   | <b>10w-f</b> | 14       | n/a                                           | n/a                                          | <i>a,e</i>     |
| 8     | <b>5-R-7-azaindole</b>               | Cl                                     | –              | –        | –                                             | –                                            |            | <b>10w-g</b> | 53       | 0.11 $\pm$ 0.04                               | 0.85 $\pm$ 0.14                              |                |
| 9     | <b>5-R-7-azaindole</b>               | Br                                     | –              | –        | –                                             | –                                            |            | <b>10w-h</b> | 17       | 0.08 $\pm$ 0.03                               | 0.81 $\pm$ 0.35                              | <i>a,e,g,h</i> |
| 10    | <b>5-R-7-azaindole</b>               | I                                      | –              | –        | –                                             | –                                            |            | <b>10w-i</b> | 5        | 0.08 $\pm$ 0.02                               | 1.24 $\pm$ 0.20                              | <i>a,g</i>     |
| 11    | <b>5-Br-6-Me-azaindole</b>           | N/A                                    | –              | –        | –                                             | –                                            |            | <b>10w-j</b> | 38       | 0.04 $\pm$ 0.02                               | 0.10 $\pm$ 0.02                              | <i>e,g,h</i>   |
| 12    | <b>6-R-7-azaindole</b>               | Me                                     | <b>9w-k</b>    | 13       | n/a                                           | n/a                                          | <i>a,e</i> | <b>10w-k</b> | 3        | 3.12 $\pm$ 0.5                                | 5.11 $\pm$ 1.4                               | <i>a,e</i>     |
| 13    | <b>6-R-7-azaindole</b>               | Cl                                     | –              | –        | –                                             | –                                            |            | <b>10w-l</b> | 41       | 3.06 $\pm$ 0.9                                | 6.21 $\pm$ 2.2                               | <i>e,h</i>     |

**Table S1** A summary of the successful 7-azaindole formations using the Pd-catalysed annulation. Yields are unoptimised. Autophagy inhibition data are shown as the mean  $\pm$  SD of three independent experiments ( $N = 3$ ;  $n \geq 3$ ). All compounds were initially assayed at a concentration of 10  $\mu$ M. For hits reducing the number of LC3 puncta by more than 50%, IC<sub>50</sub> values were determined. n/a = inactive (no reduction of LC3 puncta at 10  $\mu$ M).

**Standard conditions:** ketone **5** or **6** (1.0 eq.), 2-iodoaniline (3.0 eq.), Pd(OAc)<sub>2</sub> (20 mol%), DABCO (3.0 eq.), DMF (0.3 M), 105 °C, 24 h. All reactions performed using 100 mg (0.32 mmol) ketone **5** or **6**. See General Procedure **B** for more details. See the Experimental Section for full details of any deviations denoted.



**Notes:** <sup>a</sup>30 mol% Pd(OAc)<sub>2</sub> used (3 x 10 mol% over 72 h). <sup>b</sup>10 mol% Pd(OAc)<sub>2</sub> used over 24 h. <sup>c</sup>The 2-iodoaniline HCl salt and 6.0 eq. DABCO were used. <sup>d</sup>Purified by mass-directed preparative HPLC to give the product as the TFA salt. <sup>e</sup>Purified by column chromatography followed by mass-directed preparative HPLC to give the product as the TFA salt. <sup>f</sup>Purified by mass-directed preparative HPLC followed by column chromatography. <sup>g</sup>1.5 eq. MgSO<sub>4</sub> was added after 24 h. <sup>h</sup>Net yield from initial column before subsequent purification using mass-directed preparative HPLC.

## 2.2 Activity data for indole-containing natural products screened in the autophagy assay

**Table S2** Activity data for indole-containing natural products screened in the the autophagy assay. All compounds were initially assayed at a concentration of 10  $\mu$ M. No compounds reduced the number of LC3 puncta by more than 50%, and therefore IC<sub>50</sub> values were not determined.

| Entry | Trivial name                                                      | %activity (mean) | SMILES                                                                                                                                               | Molecular Formula | CAS Registry No. | COMAS ID |
|-------|-------------------------------------------------------------------|------------------|------------------------------------------------------------------------------------------------------------------------------------------------------|-------------------|------------------|----------|
| 1     | Chondramide A; Demethoxy                                          | 104              | <chem>C/C1=C/[C@@H](C)[C@H](C)OC(=O)C[C@H](c2ccc(O)cc2)NC(=O)[C@@H](Cc2c[nH]c3ccccc23)N(C)C(=O)[C@H](C)NC(=O)[C@H](C)C1</chem>                       | C35H44N4O6        | 172430-62-5      | 101415   |
| 2     | Mozamide A; Deoxy                                                 | 88               | <chem>CC[C@H](C)[C@H](NC(=O)N[C@@H]1CC CCNC(=O)C(Cc2ccccc2)NC(=O)[C@H](Cc2c[nH]c3ccccc23)N(C)C(=O)[C@H](CC(C)C)NC(=O)[C@H](C(C)C)NC1=O)C(=O)O</chem> | C45H64N8O8        | 909119-50-2      | 104794   |
| 3     | Koeniginequinone A                                                | 84               | <chem>COc1ccc2c3c([nH]c2c1)C(=O)C=C(C)C3=O</chem>                                                                                                    | C14H11NO3         | 110519-58-9      | 106116   |
| 4     | Koeniginequinone A; 6-Methoxy                                     | 97               | <chem>COc1cc2[nH]c3c(c2cc1OC)C(=O)C(C)=CC3=O</chem>                                                                                                  | C15H13NO4         | 211183-78-7      | 106117   |
| 5     | Carbazomycin G                                                    | 96               | <chem>COC1=C(C)C(C)(O)c2[nH]c3ccccc3c2C1=O</chem>                                                                                                    | C15H15NO3         | 115920-44-0      | 106120   |
| 6     | Carbazomycin G; 6-Methoxy                                         | 75               | <chem>COC1=C(C)C(C)(O)c2[nH]c3ccc(OC)cc3c2C1=O</chem>                                                                                                | C16H17NO4         | 115920-42-8      | 106121   |
| 7     | Dihydrogambirtannine; (S)-form, De(methoxycarbonyl)               | 92               | <chem>c1ccc2c(c1)C[C@H]1c3[nH]c4ccccc4c3CCN1C2</chem>                                                                                                | C19H18N2          | 15026-41-2       | 106132   |
| 8     | Rutaecarpine                                                      | 97               | <chem>O=c1c2ccccc2nc2n1CCc1c-2[nH]c2ccccc12</chem>                                                                                                   | C18H13N3O         | 84-26-4          | 108014   |
| 9     | Reserpine acid; 3-Epimer, O-(3,4,5-trimethoxycinnamoyl), Me ester | 100              | <chem>COC(=O)[C@H]1[C@H]2C[C@@H]3c4[nH]c5cc(OC)ccc5c4CCN3C[C@H]2C[C@@H](OC(=O)/C=C/c2cc(OC)c(OC)c2)[C@@H]1OC</chem>                                  | C35H42N2O9        | 187082-77-5      | 108015   |
| 10    | Nitrarine; ( $\pm$ )-form                                         | 91               | <chem>c1ccc2c3c([nH]c2c1)[C@H]1[C@@H]2CC[C@@H]([C@@H]1)4CCCN[C@@H]42)N1C3</chem>                                                                     | C20H25N3          |                  | 108018   |
| 11    | Ajmalicine; (-)-form                                              | 108              | <chem>COC(=O)C1=CO[C@@H](C)[C@@H]2CN3CCc4c([nH]c5ccccc45)C3C[C@H]12</chem>                                                                           | C21H24N2O3        | 483-04-5         | 108019   |
| 12    | Corynantheine; 3,20-Diepimer, 18,19-dihydro                       | 101              | <chem>CC[C@H]1CN2CCc3c([nH]c4ccccc34)[C@@H]2C[C@@H]1/C(=C\OC)C(=O)OC</chem>                                                                          | C22H28N2O3        | 7729-22-8        | 108027   |

| Entry | Trivial name                                                                       | %activity (mean) | SMILES                                                                                                                  | Molecular Formula | CAS Registry No. | COMAS ID |
|-------|------------------------------------------------------------------------------------|------------------|-------------------------------------------------------------------------------------------------------------------------|-------------------|------------------|----------|
| 13    | Yohimbine                                                                          | 101              | <chem>COC(=O)C1[C@@H](O)CC[C@@H]2CN3CCc4c([nH]c5ccccc45)[C@@H]3C[C@H]12</chem>                                          | C21H26N2O3        | 146-48-5         | 108028   |
| 14    | Vincamine; (+)-form                                                                | 97               | <chem>CC[C@]12CCCN3CCc4c(n(c5ccccc45)[C@@](O)(C(=O)OC)C1)[C@@H]32</chem>                                                | C21H26N2O3        | 1617-90-9        | 108029   |
| 15    | 2,3,4,9-Tetrahydro-1-methyl-1H-pyrido[3,4-b]indole-3-carboxylic acid; (1R,3S)-form | 101              | <chem>CC1N[C@H](C(=O)O)Cc2c1[nH]c1cccc21</chem>                                                                         | C13H14N2O2        | 42438-72-2       | 108032   |
| 16    | Reserpine; (-)-form                                                                | 112              | <chem>COC(=O)[C@H]1[C@H]2C[C@H]3c4[nH]c5cc(OC)ccc5c4CCN3C[C@H]2C[C@@H](OC(=O)c2cc(OC)c(OC)c(OC)c2)[C@@H]1OC</chem>      | C33H40N2O9        | 50-55-5          | 108033   |
| 17    | 1,2,3,4-Tetrahydro-6-hydroxy-β-carboline; Me ether                                 | 107              | <chem>COc1ccc2[nH]c3c(c2c1)CCNC3</chem>                                                                                 | C12H14N2O         | 20315-68-8       | 108034   |
| 18    | Evodiamine; (S)-form                                                               | 103              | <chem>CN1c2ccccc2C(=O)N2CCc3c([nH]c4ccccc34)C21</chem>                                                                  | C19H17N3O         | 518-17-2         | 108040   |
| 19    | Ergocornine                                                                        | 81               | <chem>CC(C)[C@H]1C(=O)N2CCC[C@H]2[C@]2(O)O[C@](NC(=O)[C@@H]3C=C4c5ccccc6[nH]cc(c56)C[C@H]4N(C)C3)(C(C)C)C(=O)N12</chem> | C31H39N5O5        | 564-36-3         | 108044   |
| 20    | 5-Hydroxytryptamine                                                                | 99               | <chem>NCCc1c[nH]c2ccc(O)cc12</chem>                                                                                     | C10H12N2O         | 50-67-9          | 108123   |
| 21    | 2,3,4,9-Tetrahydro-1H-pyrido[3,4-b]indole-3-carboxylic acid; (S)-form              | 106              | <chem>O=C(O)C1Cc2c([nH]c3ccccc23)CN1</chem>                                                                             | C12H12N2O2        | 42438-90-4       | 116230   |
| 22    | 1H-Indole-3-carboxylic acid                                                        | 110              | <chem>O=C(O)c1c[nH]c2ccccc12</chem>                                                                                     | C9H7NO2           | 771-50-6         | 124320   |
| 23    | 1H-Indole-3-propanoic acid; Methylamide                                            | 117              | <chem>CNC(=O)CCc1c[nH]c2ccccc12</chem>                                                                                  | C12H14N2O         | 69397-85-9       | 127141   |
| 24    | 1H-Indol-3-ol; OH-form, O-Ac                                                       | 108              | <chem>CC(=O)Oc1c[nH]c2ccccc12</chem>                                                                                    | C10H9NO2          | 608-08-2         | 129257   |
| 25    | 1H-Indole-3-methanol                                                               | 101              | <chem>OCc1c[nH]c2ccccc12</chem>                                                                                         | C9H9NO            | 700-06-1         | 132775   |
| 26    | Aplysinopsin; 3'-Deimino, 3'-oxo, N <sup>2</sup> N <sup>4</sup> -di-de-Me          | 87               | <chem>O=C1NC(=O)/C(=C\c2c[nH]c3ccccc23)N1</chem>                                                                        | C12H9N3O2         |                  | 164577   |
| 27    | Tryptamine                                                                         | 89               | <chem>NCCc1c[nH]c2ccccc12</chem>                                                                                        | C10H12N2          | 61-54-1          | 165364   |
| 28    | 3,6-Diiodo-9H-carbazole                                                            | 79               | <chem>Ic1ccc2[nH]c3ccc(I)cc3c2c1</chem>                                                                                 | C12H7I2N          | 57103-02-3       | 166754   |
| 29    | 2,3,4,9-Tetrahydro-1,1-dimethyl-1H-pyrido[3,4-b]indole-3-carboxylic acid; (S)-form | 95               | <chem>CC1(C)NC(C(=O)O)Cc2c1[nH]c1cccc21</chem>                                                                          | C14H16N2O2        | 73198-03-5       | 172534   |
| 30    | 1H-Indole-3-butanoic acid                                                          | 100              | <chem>O=C(O)CCc1c[nH]c2ccccc12</chem>                                                                                   | C12H13NO2         | 133-32-4         | 174746   |
| 31    | 1,2,3,4-Tetrahydro-1-methyl-β-carboline; (±)-form                                  | 85               | <chem>CC1NCCc2c1[nH]c1cccc21</chem>                                                                                     | C12H14N2          | 525-40-6         | 179383   |

| Entry | Trivial name                                             | %activity (mean) | SMILES                                                                                                                | Molecular Formula | CAS Registry No. | COMAS ID |
|-------|----------------------------------------------------------|------------------|-----------------------------------------------------------------------------------------------------------------------|-------------------|------------------|----------|
| 32    | 1H-Indole-3-acetic acid                                  | 100              | <chem>O=C(O)Cc1c[nH]c2ccccc12</chem>                                                                                  | C10H9NO2          | 87-51-4          | 200918   |
| 33    | Tryptophan; (S)-form                                     | 98               | <chem>NC(Cc1c[nH]c2ccccc12)C(=O)O</chem>                                                                              | C11H12N2O2        | 73-22-3          | 200975   |
| 34    | Tryptophan; (S)-form, N <sup>α</sup> -Ac                 | 86               | <chem>CC(=O)NC(Cc1c[nH]c2ccccc12)C(=O)O</chem>                                                                        | C13H14N2O3        | 1218-34-4        | 201023   |
| 35    | Staurosporine                                            | 98               | <chem>CN[C@@H]1C[C@H]2O[C@@](C)[C@@H]1OC)n1c3ccccc3c3c4c(c5c6ccccc6n2c5c31)C(=O)NC4</chem>                            | C28H26N4O3        | 62996-74-1       | 245396   |
| 36    | 5-Methoxytryptamine; N <sup>b</sup> -Ac                  | 93               | <chem>COc1ccc2[nH]cc(CCNC(C)=O)c2c1</chem>                                                                            | C13H16N2O2        | 73-31-4          | 245497   |
| 37    | Goniomitine                                              | 105              | <chem>CC[C@@]12CCCN[C@@H]1n1c(c(CCO)c3ccccc31)CC2</chem>                                                              | C19H26N2O         | 109794-95-8      | 245755   |
| 38    | 7-Hydroxy-1-methyl-β-carboline;<br>3,4-Dihydro, Me ether | 97               | <chem>COc1ccc2c3c([nH]c2c1)C(C)=NCC3</chem>                                                                           | C13H14N2O         | 304-21-2         | 283249   |
| 39    | 7-Hydroxy-1-methyl-β-carboline;<br>3,4-Dihydro           | 93               | <chem>CC1=NCCc2c1[nH]c1cc(O)ccc21</chem>                                                                              | C12H12N2O         | 525-57-5         | 246351   |
| 40    | 1-Methyl-β-carboline                                     | 85               | <chem>Cc1nccc2c1[nH]c1ccccc12</chem>                                                                                  | C12H10N2          | 486-84-0         | 246352   |
| 41    | 7-Hydroxy-1-methyl-β-carboline;<br>Me ether              | 81               | <chem>COc1ccc2c(c1)[nH]c1c(C)nccc12</chem>                                                                            | C13H12N2O         | 442-51-3         | 277591   |
| 42    | 7-Hydroxy-1-methyl-β-carboline                           | 81               | <chem>Cc1nccc2c1[nH]c1cc(O)ccc12</chem>                                                                               | C12H10N2O         | 487-03-6         | 246354   |
| 43    | 6-Hydroxy-1-methyl-β-carboline;<br>3,4-Dihydro, Me ether | 89               | <chem>COc1ccc2[nH]c3c(c2c1)CCN=C3C</chem>                                                                             | C13H14N2O         | 3589-73-9        | 246371   |
| 44    | Catharanthine                                            | 86               | <chem>CCC1=C[C@@H]2CN3CCc4c([nH]c5ccccc45)[C@@](C(=O)OC)(C2)[C@@H]13</chem>                                           | C21H24N2O2        | 2468-21-5        | 246642   |
| 45    | Eburnamine; (+)-form, 16-Ketone                          | 86               | <chem>CCC12CCCN3CCc4c(n(c5ccccc45)C(=O)C1)[C@@H]32</chem>                                                             | C19H22N2O         | 4880-88-0        | 284614   |
| 46    | Yohimbine; Parent acid                                   | 104              | <chem>O=C(O)[C@H]1[C@@H](O)CC[C@H]2CN3CCc4c([nH]c5ccccc45)[C@@H]3C[C@@H]21</chem>                                     | C20H24N2O3        | 522-87-2         | 247974   |
| 47    | Mahanine; (±)-form, Deoxy                                | 98               | <chem>CC(C)=CCCC1(C)C=Cc2c(c(C)cc3c2[nH]c2ccccc23)O1</chem>                                                           | C23H25NO          | 24948-14-9       | 277601   |
| 48    | Reserpinine                                              | 93               | <chem>COC(=O)C1=CO[C@@H](C)[C@@H]2CN3CCc4c([nH]c5cc(OC)ccc45)[C@@H]3C[C@H]12</chem>                                   | C22H26N2O4        | 482-96-2         | 277617   |
| 49    | Brevicarine                                              | 98               | <chem>CNCCCCc1cnc(C)c2[nH]c3ccccc3c12</chem>                                                                          | C17H21N3          | 25978-39-6       | 277645   |
| 50    | Cyclo(tryptophyltryptophyl);<br>(3R,6S)-form             | 97               | <chem>O=C1N[C@@H](Cc2c[nH]c3ccccc23)C(=O)N[C@H]1Cc1c[nH]c2ccccc12</chem>                                              | C22H20N4O2        | 175414-35-4      | 277679   |
| 51    | 1-(8-Quinoliny)-β-carboline                              | 94               | <chem>c1cnc2c(-c3nccc4c3[nH]c3ccccc34)cccc2c1</chem>                                                                  | C20H13N3          | 62209-25-0       | 277708   |
| 52    | Vinblastine                                              | 133              | <chem>CC[C@@]1(O)C[C@@H]2CN(CCc3c([nH]c4cccc34)[C@@](C(=O)OC)(c3cc4c(cc3OC)N(C)[C@H]3[C@@](O)(C(=O)OC)[C@H](OC</chem> | C46H58N4O9        | 865-21-4         | 278431   |

| Entry | Trivial name                                                                           | %activity (mean) | SMILES                                                                                                                                                | Molecular Formula | CAS Registry No. | COMAS ID |
|-------|----------------------------------------------------------------------------------------|------------------|-------------------------------------------------------------------------------------------------------------------------------------------------------|-------------------|------------------|----------|
|       |                                                                                        |                  | <chem>(C=O)[C@]5(CC)C=CCN6CC[C@]43[C@@H]65)C2)C1</chem>                                                                                               |                   |                  |          |
| 53    | Tombozine; N <sup>4</sup> -Me                                                          | 103              | <chem>C/C=C1C[N@@+]2(C)[C@H]3C[C@@H]1C(CO)[C@@H]2Cc1c3[nH]c2cccc12</chem>                                                                             | C20H25N2O         | 6792-07-0        | 278563   |
| 54    | Agroclavine; (-)-form                                                                  | 145              | <chem>CC1=C[C@@H]2c3cccc4[nH]cc(c34)C[C@H]2N(C)C1</chem>                                                                                              | C16H18N2          | 548-42-5         | 279968   |
| 55    | β-Carboline-3-carboxylic acid; Me ester                                                | 101              | <chem>COC(=O)c1cc2c(cn1)[nH]c1cccc12</chem>                                                                                                           | C13H10N2O2        | 69954-48-9       | 279993   |
| 56    | Ergocristine                                                                           | 91               | <chem>CC(C)[C@@]1(NC(=O)[C@@H]2C=C3c4cccc5[nH]cc(c45)C[C@H]3N(C)C2)O[C@@]2(O)[C@@H]3CCCN3C(=O)[C@H](Cc3cccc3)N2C1=O</chem>                            | C35H39N5O5        | 511-08-0         | 279996   |
| 57    | 5-Hydroxytryptamine; N <sup>b</sup> -Ac                                                | 99               | <chem>CC(=O)NCCc1c[nH]c2ccc(O)cc12</chem>                                                                                                             | C12H14N2O2        | 1210-83-9        | 280251   |
| 58    | Tryptamine; N <sup>b</sup> -Ac                                                         | 101              | <chem>CC(=O)NCCc1c[nH]c2cccc12</chem>                                                                                                                 | C12H14N2O         | 1016-47-3        | 280288   |
| 59    | Ellipticine                                                                            | 326              | <chem>Cc1c2ccncc2c(C)c2c1[nH]c1cccc12</chem>                                                                                                          | C17H14N2          | 519-23-3         | 280538   |
| 60    | 5,6-Dihydroxytryptamine; 5-Me ether, N <sup>b</sup> -Ac                                | 123              | <chem>COc1cc2c(CCNC(C)=O)c[nH]c2cc1O</chem>                                                                                                           | C13H16N2O3        | 2208-41-5        | 280590   |
| 61    | 5-Hydroxy-1H-indole-3-acetic acid                                                      | 94               | <chem>O=C(O)Cc1c[nH]c2ccc(O)cc12</chem>                                                                                                               | C10H9NO3          | 54-16-0          | 280613   |
| 62    | 5-Hydroxytryptophan; (S)-form                                                          | 103              | <chem>N[C@@H](Cc1c[nH]c2ccc(O)cc12)C(=O)O</chem>                                                                                                      | C11H12N2O3        | 8/09/4350        | 280615   |
| 63    | 5-Hydroxytryptamine; N <sup>b</sup> -Me                                                | 94               | <chem>CNCCc1c[nH]c2ccc(O)cc12</chem>                                                                                                                  | C11H14N2O         | 1134-01-6        | 280703   |
| 64    | Talopeptin                                                                             | 124              | <chem>CC(C)CC(NP(=O)(O)O)[C@@H]1O[C@@H](C)[C@H](O)[C@@H](O)[C@H]1O)C(=O)NC(Cc1c[nH]c2cccc12)C(=O)O</chem>                                             | C23H34N3O10P      | 84235-60-9       | 280895   |
| 65    | Vincristine                                                                            | 145              | <chem>CCC1(O)CC2CN(CCc3c([nH]c4cccc34)[C@@](C(=O)OC)(c3cc4c(cc3OC)N(C=O)C3[C@@](O)(C(=O)OC)[C@H](OC(C)=O)[C@]5(CC)C=CCN6CC[C@]43[C@@H]65)C2)C1</chem> | C46H56N4O10       | 57-22-7          | 281038   |
| 66    | Ergometrine                                                                            | 102              | <chem>C[C@@H](CO)NC(=O)C1C=C2c3cccc4[nH]jcc(c34)C[C@H]2N(C)C1</chem>                                                                                  | C19H23N3O2        | 60-79-7          | 282116   |
| 67    | β-Carboline                                                                            | 84               | <chem>c1ccc2c(c1)[nH]c1cnccc12</chem>                                                                                                                 | C11H8N2           | 244-63-3         | 282790   |
| 68    | N-Methyltryptophan; (R)-form                                                           | 107              | <chem>CNC(Cc1c[nH]c2cccc12)C(=O)O</chem>                                                                                                              | C12H14N2O2        | 862504-05-0      | 282822   |
| 69    | 2,3,4,9-Tetrahydro-1H-pyrido[3,4-b]indol-1-one; N <sup>2</sup> -(2-Methylaminobenzoyl) | 81               | <chem>CNc1cccc1C(=O)N1CCc2c([nH]c3cccc23)C1=O</chem>                                                                                                  | C19H17N3O2        | 526-43-2         | 282896   |
| 70    | Thienodolin                                                                            | 95               | <chem>NC(=O)c1cc2c([nH]c3cc(Cl)ccc32)s1</chem>                                                                                                        | C11H7ClN2OS       | 149127-27-5      | 283324   |
| 71    | Telomycin                                                                              | 78               | <chem>CC1NC(=O)C(C(C)O)NC(=O)C(NC(=O)C(C)O)NC(=O)CC(N)C(=O)O)C(C)OC(=O)C2C(</chem>                                                                    | C59H77N13O19      | 19246-24-3       | 283392   |

| Entry | Trivial name                                    | %activity (mean) | SMILES                                                                                                                            | Molecular Formula | CAS Registry No. | COMAS ID |
|-------|-------------------------------------------------|------------------|-----------------------------------------------------------------------------------------------------------------------------------|-------------------|------------------|----------|
|       |                                                 |                  | <chem>O)CCN2C(=O)C(C(O)C(C)C)NC(=O)C(C(C)c2c[nH]c3cccc23)NC(=O)/C(=C/c2c[nH]c3cccc23)NC(=O)C2C(O)CCN2C(=O)CNC1=O</chem>           |                   |                  |          |
| 72    | 3,4-Dihydroxy-1,2-dimethylcarbazole; 3-Me ether | 78               | <chem>COc1c(C)c(C)c2[nH]c3cccc3c2c1O</chem>                                                                                       | C15H15NO2         | 75139-38-7       | 283710   |
| 73    | 3-Greenwayodendrinol; 3 $\alpha$ -form          | 62               | <chem>CC1(C)C(O)CCC2(C)C1CCC1(C)C2Cc2cc3cccc3n21</chem>                                                                           | C23H31NO          | 85027-87-8       | 283728   |
| 74    | Bis(7-hydroxygirinimbine A); 6,6'-Dimethoxy     | 96               | <chem>COc1cc2c([nH]c3c4c(c(C)cc32)OC(C)(C)C=C4)c(-c2c(O)c(OC)cc3c2[nH]c2c4c(c(C)cc23)OC(C)(C)C=C4)c1O</chem>                      | C38H36N2O6        | 477890-82-7      | 283782   |
| 75    | 5-Carboxystrictosidine                          | 116              | <chem>C=C[C@H]1[C@H](O[C@@H]2O[C@H](CO)[C@@H](O)[C@H](O)[C@H]2O)OC=C(C(=O)OC)[C@H]1C[C@@H]1N[C@H](C(=O)O)Cc2c1[nH]c1cccc21</chem> | C28H34N2O11       | 34371-11-4       | 283886   |
| 76    | Sarpagine                                       | 102              | <chem>C/C=C1/CN2C3CC1C(CO)C2Cc1c3[nH]c2cc(O)cc12</chem>                                                                           | C19H22N2O2        | 482-68-8         | 283899   |
| 77    | Girinimbine; 8-Methoxy                          | 98               | <chem>COc1ccc2[nH]c3c4c(c(C)cc3c2c1)OC(C)(C)C=C4</chem>                                                                           | C19H19NO2         | 21087-98-9       | 284383   |
| 78    | Mahanimbicine; (+)-form, 7-Hydroxy              | 82               | <chem>CC(C)=CCCC1(C)C=Cc2c(ccc3c2[nH]c2cc(O)c(C)cc23)O1</chem>                                                                    | C23H25NO2         | 138876-26-3      | 284384   |
| 79    | Fumitremorgin C                                 | 102              | <chem>COc1ccc2c3c([nH]c2c1)C(C=C(C)C)N1C(=O)C2CCCN2C(=O)C1C3</chem>                                                               | C22H25N3O3        | 118974-02-0      | 284423   |
| 80    | 4,5-Dihydroxycanthin-6-one; Di-Me ether         | 75               | <chem>COc1c(OC)c2nccc3c4cccc4n(c1=O)c23</chem>                                                                                    | C16H12N2O3        | 18110-87-7       | 284476   |
| 81    | 1-Acetyl- $\beta$ -carboline                    | 80               | <chem>CC(=O)c1nccc2c1[nH]c1cccc12</chem>                                                                                          | C13H10N2O         | 50892-83-6       | 336423   |
| 82    | 3,6-Dibromo-9H-carbazole                        | 160              | <chem>BrC1ccc2[nH]c3ccc(Br)cc3c2c1</chem>                                                                                         | C12H7Br2N         | 6825-20-3        | 393546   |

### 2.3 Kinases showing *in vitro* inhibition below 10 $\mu\text{M}$ by azaquindole-1

The following kinases were inhibited  $<10 \mu\text{M}$  by azaquindole-1 (compound **10w-j**, Table S3):

| Entry | Kinase         | [ATP] / $\mu\text{M}$   | IC <sub>50</sub> /nM |
|-------|----------------|-------------------------|----------------------|
| 1     | CLK4           | n/a                     | 93.9                 |
| 2     | PIK3C3 (VPS34) | Apparent K <sub>M</sub> | 350                  |
| 3     | PIK3C2G*       | Apparent K <sub>M</sub> | 497                  |
| 4     | CLK2           | Apparent K <sub>M</sub> | 572                  |
| 5     | PIK3C2B        | 100                     | 2160                 |
| 6     | SPHK2          | 10                      | 2770                 |
| 7     | PIK3CD/PIK3R1  | Apparent K <sub>M</sub> | 4790                 |
| 8     | PI4KB*         | Apparent K <sub>M</sub> | 5160                 |

**Table S3** Kinases inhibited at  $<10 \mu\text{M}$  by **10w-j**. \*Potential roles in autophagy inhibition devalidated previously.<sup>[2]</sup>

For the complete list of kinases investigated in the study see Section 5.5.

## 2.4 Investigation of selective kinase inhibitors in the autophagy assay

To investigate any potential roles for the kinases shown in Table S3 in autophagy inhibition, we investigated potent and selective kinase inhibitors associated with each target in the autophagy assay (Table S4). The following kinases were inhibited <10  $\mu$ M by azaquindole-1 (compound **10w-j**, see also Table S3):

| Entry | Kinase(s)     | Inhibitor            | Short description                                                                                                                                                                                                                             | Starvation-induced IC <sub>50</sub> / $\mu$ M | Rapamycin-induced IC <sub>50</sub> / $\mu$ M | Inference                                                                            |
|-------|---------------|----------------------|-----------------------------------------------------------------------------------------------------------------------------------------------------------------------------------------------------------------------------------------------|-----------------------------------------------|----------------------------------------------|--------------------------------------------------------------------------------------|
| 1     | CLK4;<br>CLK2 | ML167                | Inhibitor of CLK4 with IC <sub>50</sub> = 136 nM, >10-fold selectivity over related related kinases CLK1 (1.52 $\mu$ M), CLK2 (1.65 $\mu$ M), CLK3 (>10 $\mu$ M), DYRK1A (>10 $\mu$ M), and DYRK1B (4.4 $\mu$ M). <sup>[3,4]</sup>            | n/a                                           | n/a                                          | Inhibition of CLK4 and/or CLK2 is not likely to be relevant to autophagy inhibition. |
|       |               | TG003                | Inhibitor of CLKs with IC <sub>50</sub> = 15, 20 and 200 nM for CLK4, 1 and 2, respectively, and >10 $\mu$ M for CLK3. <sup>[5]</sup> Also inhibits DYRK1A/B (IC <sub>50</sub> = 24 and 34 nM respectively). <sup>[6]</sup>                   | n/a                                           | n/a                                          |                                                                                      |
| 2     | PIK3C2B       | –                    | No selective inhibitors were commercially available.                                                                                                                                                                                          | –                                             | –                                            | –                                                                                    |
| 3     | SPHK2         | ABC294640            | Inhibitor of SPHK2 with IC <sub>50</sub> = 60 $\mu$ M, and >1.5 selectivity over SPHK1. <sup>[7]</sup>                                                                                                                                        | n/a                                           | n/a                                          | Inhibition of SPHK2 is not likely to be relevant to autophagy inhibition.            |
|       |               | PF-543               | Inhibitor of SPHK1 with IC <sub>50</sub> = 2.7 nM. Inhibits SPHK2 with IC <sub>50</sub> = 356 nM. <sup>[8]</sup>                                                                                                                              | n/a                                           | n/a                                          |                                                                                      |
| 4     | PIK3CD        | IC-87114             | Inhibitor of PI3K $\delta$ with IC <sub>50</sub> = 0.5 $\mu$ M, >50-fold selectivity over PI3K $\gamma$ and PI3K $\beta$ (IC <sub>50</sub> = 29 and 75 $\mu$ M, respectively) and >200-fold over PI3K $\alpha$ (>100 $\mu$ M). <sup>[9]</sup> | n/a                                           | n/a                                          | Inhibition of PIK3CD is not likely to be relevant to autophagy inhibition.           |
|       |               | Idelalisib (CAL-101) | Inhibitor of PI3K $\delta$ with IC <sub>50</sub> = 2.5nM, >30-fold selectivity over PI3K $\gamma$ (89 nM) and >200-fold over PI3K $\alpha$ (820 nM), PI3K $\beta$ (565 nM). ~400-fold activity over VPS34 (978 nM). <sup>[10]</sup>           | 5.34 $\pm$ 3.5                                | 4.82 $\pm$ 2.4                               |                                                                                      |
|       |               | Nemiralisib          | Inhibitor of PI3K $\delta$ with pK <sub>i</sub> = 9.9, 1,000-fold selective over PI3K $\alpha$ , $\beta$ , and $\gamma$ isoforms. <sup>[11]</sup>                                                                                             | n/a                                           | n/a                                          |                                                                                      |

**Table S4** Investigation of selective kinase inhibitors in the autophagy assay. Autophagy inhibition data are shown as the mean  $\pm$  SD of three independent experiments ( $N = 3$ ;  $n \geq 3$ ). All compounds were initially assayed at a concentration of 10  $\mu$ M. For hits reducing the number of LC3 puncta by more than 50%, IC<sub>50</sub> values were determined. n/a = inactive (no reduction of LC3 puncta at 10  $\mu$ M).



## 2.5 *In vitro* IC<sub>50</sub> measurements for azaquindoles and related structures against VPS34

The following compounds were assessed for inhibition (<10 μM) of VPS34 (Table S5):

| Entry | Compound No. | Compound Structure                                                                   | [ATP] /μM               | IC <sub>50</sub> /nM |
|-------|--------------|--------------------------------------------------------------------------------------|-------------------------|----------------------|
| 1     | 10w-j        | 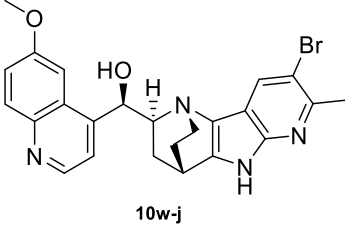    | Apparent K <sub>M</sub> | 350                  |
| 2     | 10w-i        |    | Apparent K <sub>M</sub> | 627                  |
| 3     | 10w-b        |   | Apparent K <sub>M</sub> | 656                  |
| 4     | 10w-k        |  | Apparent K <sub>M</sub> | 3280                 |
| 5     | S-1          |  | Apparent K <sub>M</sub> | >10000               |

**Table S5** Kinases inhibited at <10 μM by compounds **10w** and related structures.

### 3.0 Pd-catalysed indole formations: substrate scope summary

In initial investigations (manuscript Figure 2), 43/62 (69%) of Pd-catalysed indole formations attempted were successful (see Section 3.2 for failed reaction scope). In the subsequent SAR investigations around the initial hit compounds **10u** and **10w**, 3/6 (50%) and 15/22 (68%), of the additional reactions attempted were successful respectively (see Section 3.4 for failed reaction scope). Overall 61/90 (68%) of the attempted indole formations using the Pd-catalysed annulation were successful (excluding the compounds from Figure S3).

#### 3.1 Substrate scope experiments: successful reactions

The yields for the successful reactions are summarised below in Table S6.

| Entry | Functionalised at indole position... | R =                | From quinidine |          |              | From quinine |          |            |
|-------|--------------------------------------|--------------------|----------------|----------|--------------|--------------|----------|------------|
|       |                                      |                    | Nr             | Yield /% | Notes        | Nr           | Yield /% | Notes      |
| 1     | 4/5/6/7 = R                          | H                  | 9a             | 49       |              | 10a          | 17       | <i>b,f</i> |
| 2     | 4 = R; 5/6/7 = H                     | Me                 | 9b             | 49       |              | 10b          | 46       |            |
| 3     | 4 = R; 5/6/7 = H                     | CO <sub>2</sub> Me | 9c             | 18       | <i>a</i>     | 10c          | 12       | <i>a</i>   |
| 4     | 4 = R; 5/6/7 = H                     | Cl                 | 9d             | 77       | <i>b</i>     | 10d          | 10       | <i>b</i>   |
| 5     | 5 = R; 4/6/7 = H                     | Me                 | 9e             | 45       |              | 10e          | 17       | <i>f</i>   |
| 6     | 5 = R; 4/6/7 = H                     | CO <sub>2</sub> H  | 9f             | 14       | <i>a,d,f</i> | 10f          | 9        | <i>b,d</i> |
| 7     | 5 = R; 4/6/7 = H                     | CO <sub>2</sub> Me | 9g             | 3        | <i>a,e</i>   | –            | 0        |            |
| 8     | 5 = R; 4/6/7 = H                     | CF <sub>3</sub>    | 9h             | 25       |              | 10h          | 23       | <i>a</i>   |
| 9     | 5 = R; 4/6/7 = H                     | NO <sub>2</sub>    | 9i             | 12       | <i>a,e</i>   | 10i          | 3        | <i>a,e</i> |
| 10    | 5 = R; 4/6/7 = H                     | OMe                | 9j             | 23       | <i>a,c</i>   | 10j          | 6        | <i>a</i>   |
| 11    | 5 = R; 4/6/7 = H                     | OCF <sub>3</sub>   | –              | nd       |              | 10k          | 65       | <i>b</i>   |
| 12    | 5 = R; 4/6/7 = H                     | F                  | 9l             | 19       | <i>d</i>     | 10l          | 47       |            |
| 13    | 5 = R; 4/6/7 = H                     | Cl                 | 9m             | 48       |              | 10m          | 59       | <i>b,d</i> |
| 14    | 5 = R; 4/6/7 = H                     | Br                 | 9n             | 8        | <i>e</i>     | 10n          | 15       |            |
| 15    | 6 = R; 4/5/7 = H                     | Me                 | 9o             | 12       | <i>a,e</i>   | 10o          | 4        |            |
| 16    | 6 = R; 4/5/7 = H                     | CO <sub>2</sub> H  | 9p             | 11       | <i>b,d</i>   | 10p          | 14       | <i>d</i>   |
| 17    | 6 = R; 4/5/7 = H                     | CO <sub>2</sub> Me | 9q             | 7        | <i>a</i>     | –            | 0        |            |
| 18    | 6 = R; 4/5/7 = H                     | CF <sub>3</sub>    | 9r             | 25       |              | 10r          | 70       | <i>b</i>   |
| 19    | 6 = R; 4/5/7 = H                     | Cl                 | 9s             | 26       |              | 10s          | 20       |            |
| 20    | 6 = R; 4/5/7 = H                     | Br                 | 9t             | 9        | <i>a,e</i>   | 10t          | 27       | <i>a</i>   |
| 21    | 7 = R; 4/5/6 = H                     | OMe                | 9u             | 16       | <i>a,e</i>   | 10u          | 33       |            |
| 22    | 4-azaindole                          | N/A                | –              | 0        |              | –            | nd       |            |
| 23    | 5-azaindole                          | N/A                | –              | 0        |              | –            | nd       |            |
| 24    | 6-azaindole                          | N/A                | 9v             | 50       | <i>d</i>     | 10v          | 65       | <i>b</i>   |
| 25    | 7-azaindole                          | N/A                | 9w             | 17       | <i>d</i>     | 10w          | 13       | <i>a,e</i> |

**Table S6** A summary of the successful substrate scope and yields for the indole formations using the Pd-catalysed annulation. Some notable failed substrates are included (Entries 7, 17, 22 and 23. See also Section 3.2). Yields are unoptimised.

**Standard conditions:** ketone **5** or **6** (1.0 eq.), 2-iodoaniline (3.0 eq.), Pd(OAc)<sub>2</sub> (20 mol%), DABCO (3.0 eq.), DMF (0.3 M), 105 °C, 24 h. All reactions performed using 100 mg (0.32 mmol) ketone **5** or **6** See General Procedure **B** for more details. See the Experimental Section for full details of any deviations denoted.

**Notes:** <sup>a</sup>30 mol% Pd(OAc)<sub>2</sub> used (3 x 10 mol% over 72 h). <sup>b</sup>10 mol% Pd(OAc)<sub>2</sub> used over 24 h. <sup>c</sup>The 2-iodoaniline HCl salt and 6.0 eq. DABCO were used. <sup>d</sup>Purified by mass-directed preparative HPLC to give the product as the TFA salt. <sup>e</sup>Purified by column chromatography followed by mass-directed preparative HPLC to give the product as the TFA salt. <sup>f</sup>Purified by mass-directed preparative HPLC followed by column chromatography. N/A = not applicable. nd = not determined (reaction not carried out).

### 3.2 Substrate scope experiments: failed reactions

The following reactions failed during investigation of the substrate scope of the Pd-catalysed indole formation:

| Entry | 2-Iodoaniline                                                                                                     | Ketone | Notes                           |
|-------|-------------------------------------------------------------------------------------------------------------------|--------|---------------------------------|
| 1     | 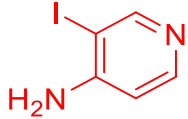<br>4-amino-3-iodopyridine       | 5      | not observed by LCMS after 24 h |
| 2     | <br>3-amino-2-iodopyridine       | 5      | not observed by LCMS after 24 h |
| 3     | <br>3-amino-2-iodobenzoic acid  | 6      | not observed by LCMS after 24 h |
| 4     | <br>4-amino-3-iodobenzonitrile | 6      | not observed by LCMS after 24 h |
| 5     | <br>2-iodo-1,4-benzenediamine  | 6      | not observed by LCMS after 24 h |
| 6     | <br>2-iodo-5-methoxyaniline    | 6      | not observed by LCMS after 24 h |

| Entry | 2-Iodoaniline                                                                                                     | Ketone | Notes                                                                                      |
|-------|-------------------------------------------------------------------------------------------------------------------|--------|--------------------------------------------------------------------------------------------|
| 7     | 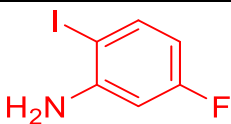<br>5-fluoro-2-iodoaniline       | 5      | trace by LCMS (<5%) after 72 h (30 mol% Pd(OAc) <sub>2</sub> , unable to isolate cleanly)  |
| 8     | <br>2-amino-3-iodobenzoic acid   | 6      | not observed by LCMS after 24 h                                                            |
| 9     | <br>2-amino-3-iodo-phenol        | 6      | not observed by LCMS after 24 h                                                            |
| 10    | <br>2-iodo-4,6-dimethylaniline  | 5      | not observed by LCMS after 24 h                                                            |
| 11    | <br>2,4-dichloro-6-iodoaniline | 6      | trace by LCMS (<10%) after 72 h (30 mol% Pd(OAc) <sub>2</sub> , unable to isolate cleanly) |

**Table S7** Failed reactions in substrate scope studies. *Conditions:* ketone **5** or **6** (1.0 eq.), 2-iodoaniline (3.0 eq.), Pd(OAc)<sub>2</sub> (20 mol%), DABCO (3.0 eq.), DMF (0.3 M), 105 °C, 24 h). All reactions performed using 100 mg (0.32 mmol) ketone **5** or **6**.

### 3.3 SAR investigations: successful reactions

In SAR investigations around compound **10u**, 3/6 (50%) additional reactions attempted were successful (Table S8; see Section 3.4 for the failed reaction scope):

| Entry | Functionalised at indole position...     | R = | From quinine |          |              |
|-------|------------------------------------------|-----|--------------|----------|--------------|
|       |                                          |     | Nr           | Yield /% | Notes        |
| 1     | <b>7 = R</b> ; 4/5/6 = H                 | F   | <b>10x</b>   | 18       | <i>a</i>     |
| 2     | <b>7 = R</b> ; 4/5/6 = H                 | Cl  | <b>10y</b>   | 53       | <i>b</i>     |
| 3     | <b>7-OMe-5-(CO<sub>2</sub>Me)-indole</b> | N/A | <b>10z</b>   | 1        | <i>a,c,d</i> |

**Table S8** A summary of the successful 7-substituted indole formations using the Pd-catalysed annulation. Yields are unoptimised.

**Standard conditions:** ketone **5** or **6** (1.0 eq.), 2-iodoaniline (3.0 eq.), Pd(OAc)<sub>2</sub> (20 mol%), DABCO (3.0 eq.), DMF (0.3 M), 105 °C, 24 h. All reactions performed using 100 mg (0.32 mmol) ketone **5** or **6**. See General Procedure **B** for more details. See the Experimental Section for full details of any deviations denoted.

**Notes:** <sup>a</sup>30 mol% Pd(OAc)<sub>2</sub> used (3 x 10 mol% over 72 h). <sup>b</sup>10 mol% Pd(OAc)<sub>2</sub> used over 24 h. <sup>c</sup>1.5 eq. MgSO<sub>4</sub> was added after 24 h. <sup>d</sup>Purified by column chromatography followed by mass-directed preparative HPLC to give the product as the TFA salt.

The biological activities of the above compounds in the autophagy assay were as follows:

| Entry | Compound   | R-group and position          | Starvation-induced<br>IC <sub>50</sub> /μM | Rapamycin-induced<br>IC <sub>50</sub> /μM |
|-------|------------|-------------------------------|--------------------------------------------|-------------------------------------------|
| 1     | <b>10x</b> | 7-F                           | n/a                                        | n/a                                       |
| 2     | <b>10y</b> | 7-Cl                          | n/a                                        | n/a                                       |
| 3     | <b>10z</b> | 7-OMe-5-(CO <sub>2</sub> Me)- | 2.25 ± 0.1                                 | 2.33 ± 0.5                                |

**Table S9** Inhibition of starvation and/or rapamycin-induced autophagy by analogues of compound **10u**. All data are shown as mean ± SD of three independent experiments (*N* = 3; *n* = 3). All compounds were initially assayed at a concentration of 10 μM. For hits reducing the number of LC3 puncta by more than 50%, IC<sub>50</sub> values were determined. n/a = inactive (no reduction of LC3 puncta at 10 μM). Ar = 4-Cl-(C<sub>6</sub>H<sub>4</sub>).

In SAR investigations around compound **10w**, 15/22 (68%) of reactions attempted were successful (Table S10; see Section 3.4 for failed reaction scope):

| Entry     | Functionalised at indole position... | R =                                    | From quinidine |          |            | From quinine |          |                |
|-----------|--------------------------------------|----------------------------------------|----------------|----------|------------|--------------|----------|----------------|
|           |                                      |                                        | Nr             | Yield /% | Notes      | Nr           | Yield /% | Notes          |
| <b>1</b>  | <b>4-R-7-azaindole</b>               | Cl                                     |                |          |            | <b>10w-a</b> | 19       | <i>a,d,g</i>   |
| <b>2</b>  | <b>5-R-7-azaindole</b>               | Me                                     | <b>9w-b</b>    | 51       | <i>a</i>   | <b>10w-b</b> | 30       | <i>a</i>       |
| <b>3</b>  | <b>5-R-7-azaindole</b>               | 4-Cl-(C <sub>6</sub> H <sub>5</sub> )- | –              | –        |            | <b>10w-c</b> | 33       | <i>e,h</i>     |
| <b>4</b>  | <b>5-R-7-azaindole</b>               | CF <sub>3</sub>                        | –              | –        |            | <b>10w-d</b> | 24       | <i>e,g,h</i>   |
| <b>5</b>  | <b>5-R-7-azaindole</b>               | NO <sub>2</sub>                        | –              | –        |            | <b>10w-e</b> | 10       | <i>a,d,g</i>   |
| <b>6</b>  | <b>5-R-7-azaindole</b>               | F                                      | <b>9w-f</b>    | 38       | <i>a</i>   | <b>10w-f</b> | 14       | <i>a,e</i>     |
| <b>7</b>  | <b>5-R-7-azaindole</b>               | Cl                                     | –              | –        |            | <b>10w-g</b> | 53       |                |
| <b>8</b>  | <b>5-R-7-azaindole</b>               | Br                                     | –              | –        |            | <b>10w-h</b> | 17       | <i>a,e,g,h</i> |
| <b>9</b>  | <b>5-R-7-azaindole</b>               | I                                      | –              | –        |            | <b>10w-i</b> | 5        | <i>a,g</i>     |
| <b>10</b> | <b>5-Br-6-Me-azaindole</b>           | N/A                                    | –              | –        |            | <b>10w-j</b> | 38       | <i>e,g,h</i>   |
| <b>11</b> | <b>6-R-7-azaindole</b>               | Me                                     | <b>9w-k</b>    | 13       | <i>a,e</i> | <b>10w-k</b> | 3        | <i>a,e</i>     |
| <b>12</b> | <b>6-R-7-azaindole</b>               | Cl                                     | –              | –        |            | <b>10w-l</b> | 41       | <i>e,h</i>     |

**Table S10** A summary of the successful 7-azaindole formations using the Pd-catalysed annulation. Yields are unoptimised.

**Standard conditions:** ketone **5** or **6** (1.0 eq.), 2-iodoaniline (3.0 eq.), Pd(OAc)<sub>2</sub> (20 mol%), DABCO (3.0 eq.), DMF (0.3 M), 105 °C, 24 h). All reactions performed using 100 mg (0.32 mmol) ketone **5** or **6**. See General Procedure **B** for more details. See the Experimental Section for full details of any deviations denoted.

**Notes:** <sup>a</sup>30 mol% Pd(OAc)<sub>2</sub> used (3 x 10 mol% over 72 h). <sup>b</sup>10 mol% Pd(OAc)<sub>2</sub> used over 24 h. <sup>c</sup>The 2-iodoaniline HCl salt and 6.0 eq. DABCO were used. <sup>d</sup>Purified by mass-directed preparative HPLC to give the product as the TFA salt. <sup>e</sup>Purified by column chromatography followed by mass-directed preparative HPLC to give the product as the TFA salt. <sup>f</sup>Purified by mass-directed preparative HPLC followed by column chromatography. <sup>g</sup>1.5 eq. MgSO<sub>4</sub> was added after 24 h. <sup>h</sup>Net yield from column before subsequent purification using mass-directed preparative HPLC.

### 3.4 SAR investigations: failed reactions

The following reactions failed during SAR studies to investigate the preparation of analogues of compound **10u** using the Pd-catalysed indole formation (note that Entries 1 and 3 were investigated in the initial substrate scoping experiments [see Table S7] and are included here for completeness):

| Entry | 2-Iodoaniline                                                                                                                                 |
|-------|-----------------------------------------------------------------------------------------------------------------------------------------------|
| 1*    | 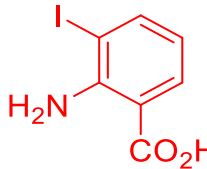<br>2-amino-3-iodobenzoic acid                               |
| 2     | <br>methyl 2-amino-3-iodobenzoate                            |
| 3*    | <br>2-amino-3-iodo-phenol                                  |
| 4     | <br>methyl 4-amino-3-(benzyloxy)-5-iodobenzenecarboxylate |
| 5     | <br>2-bromo-6-iodoaniline                                  |

**Table S11** Failed reactions in SAR studies. *Conditions:* ketone **6** (1.0 eq.), 2-iodoaniline (3.0 eq.), Pd(OAc)<sub>2</sub> (20 mol%), DABCO (3.0 eq.), DMF (0.3 M). When no conversion was observed by LCMS after 24 h, additional Pd(OAc)<sub>2</sub> (10 mol%) and MgSO<sub>4</sub> (1.5 eq.) were added. The reaction mixture was degassed with Ar (10 min), then heated at 105 °C for a further 24 h. All reactions performed using 100 mg (0.32 mmol) ketone **6**. All reactions were monitored by LCMS. \*Investigated in original substrate scoping reactions, see Table S7.



The following reactions failed during SAR studies to investigate the preparation of analogues of compound **10w** using the Pd-catalysed indole formation:

| Entry | 2-Iodoaniline                                                                                                                     |
|-------|-----------------------------------------------------------------------------------------------------------------------------------|
| 1     | 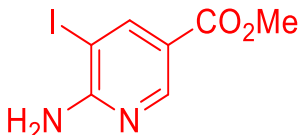<br>methyl 6-amino-5-iodopyridine-3-carboxylate |
| 2     | <br>6-amino-5-iodonicotinonitrile                |
| 3     | <br>3-iodopyridine-2,6-diamine                   |
| 4     | <br>2-amino-3-iodopyrazine                     |
| 5     | <br>4-amino-5-iodopyrimidine                   |
| 6     | <br>4-amino-2-chloro-5-iodopyrimidine          |
| 7     | <br>3-Amino-4-iodo-1H-pyrazole                 |

**Table S12** Failed reactions in SAR studies. *Conditions:* ketone **6** (1.0 eq.), 2-iodoaniline (3.0 eq.), Pd(OAc)<sub>2</sub> (20 mol%), DABCO (3.0 eq.), DMF (0.3 M). When no conversion was observed by LCMS after 24 h, additional Pd(OAc)<sub>2</sub> (10 mol%) and MgSO<sub>4</sub> (1.5 eq.) were added. The reaction mixture was degassed with Ar (10 min), then heated at 105 °C for a further 24 h. All reactions performed using 100 mg (0.32 mmol) ketone **6**. All reactions were monitored by LCMS.

## 4.0 Computational analysis

### 4.1 Compounds in the analysis

The following compounds were used to construct Figures 2c-d in the manuscript along with the molecular property analysis in Figure S2. A total of 55 compounds were included in the study:- indoquinidines (22 compounds, black); indoquinines (20 compounds, blue); azaquindoles (13 compounds, pink).

indoquinidines 9a-w

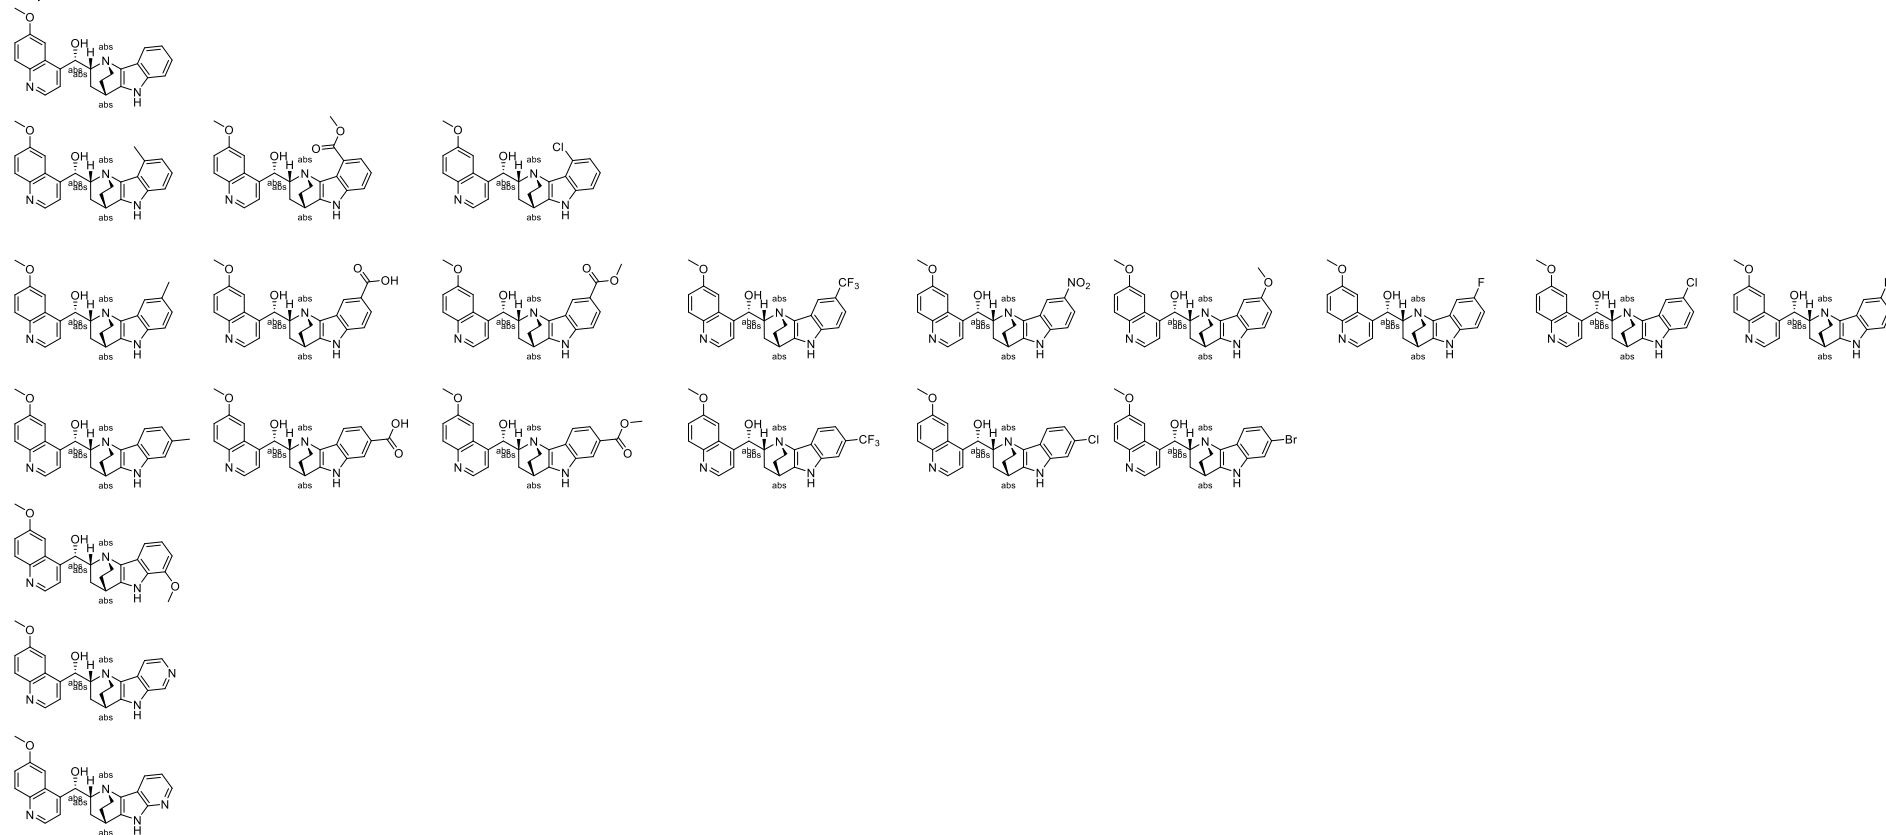

## Indoquinines 10a-v

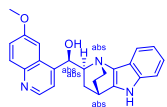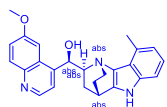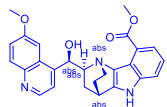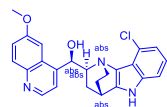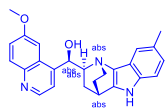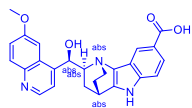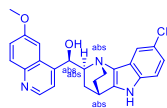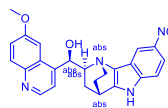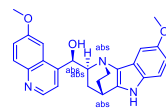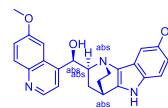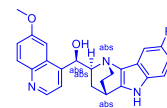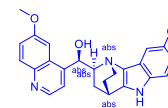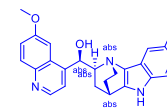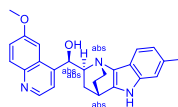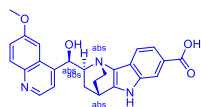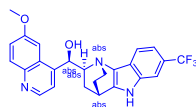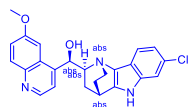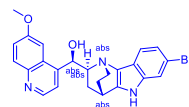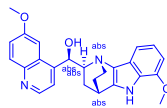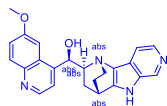

## 7-azaindoquinines 10w to 10w-l

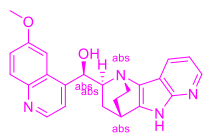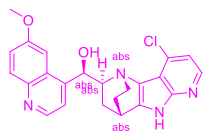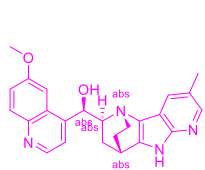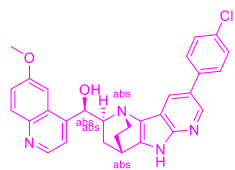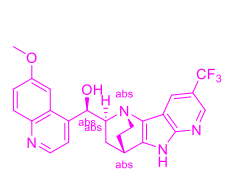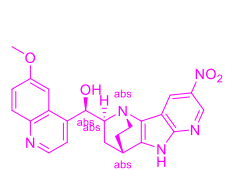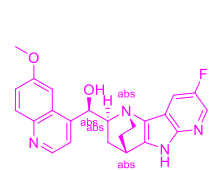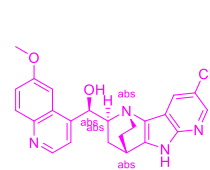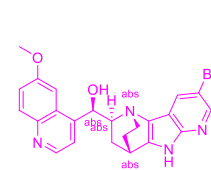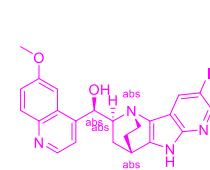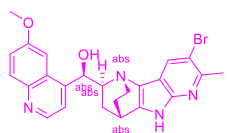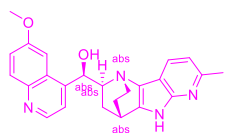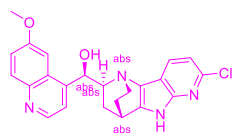

## 4.2 NP-likeness scoring

Natural product likeness scores were calculated using the method of Ertl *et al.*<sup>[12]</sup> using the implementation in RDKit v2017.09.1 (Greg Landrum; Open Source Cheminformatics Software; <http://www.rdkit.org>; last accessed 28/05/2018).

For the preparation of Figure 2d, the following databases were used:

- Drugbank Approved + Experimental v5.1.0 (7360 compounds [2325 + 5035], <https://www.drugbank.ca/releases/latest#structures>; downloaded 28/05/2018).
- ChEMBL v23 (35k unique compounds with *J. Nat. Prod.* as source document, release date May 2017, downloaded 28/05/2018).

## 4.3 Molecular properties analysis

The following data were calculated using LLAMA.<sup>[13]</sup>

See also Figure S2, Section 1.2.

A summary of the molecular properties of the cinchona alkaloids, quinidine and quinine, is given below:

| Entry | Property         | Quinidine | Quinine |
|-------|------------------|-----------|---------|
| 1     | MW /Da           | 324       | 324     |
| 2     | ALogP            | 2.73      | 2.73    |
| 3     | tPSA             | 45.6      | 45.6    |
| 4     | Fsp <sup>3</sup> | 0.45      | 0.45    |

**Table S13** Molecular properties of the Cinchona alkaloids.

A summary of the molecular properties of the indocinchona library, including azaindoles **10w**, is given below:

| Entry | Property         | Range     | Average |
|-------|------------------|-----------|---------|
| 1     | MW /Da           | 385-512   | 427     |
| 2     | ALogP            | 2.74-5.14 | 3.94    |
| 3     | tPSA             | 61-120    | 73      |
| 4     | Fsp <sup>3</sup> | 0.24-0.33 | 0.30    |

**Table S14** Molecular properties of the indocinchona alkaloid library. Compounds included are detailed in Section 4.1 above (55 compounds in total).

A summary of the molecular properties of the 7-azaindoquinines **10w** to **10w-j** is given below:

| Entry | Property         | Range     | Average |
|-------|------------------|-----------|---------|
| 1     | MW /Da           | 386-512   | 438     |
| 2     | ALogP            | 3.06-5.14 | 3.86    |
| 3     | tPSA             | 74-120    | 78      |
| 4     | Fsp <sup>3</sup> | 0.24-0.33 | 0.31    |

**Table S15** Molecular properties of the 7-azaindoquinines **10w**.  
Compounds **10w** to **10w-j** are detailed in Section 4.1 above (13 compounds in total).

#### 4.4 Novelty assessment

See Section 1.1, Figure S1, for substructure searches within the Dictionary of Natural Products.

A Chemical Abstracts Service (CAS) search using SciFinder (<https://scifinder.cas.org>, accessed 28/05/2018), and a Reaxys search ([www.reaxys.com](http://www.reaxys.com), accessed 28/05/2018), revealed that the indocinchona scaffold is unknown (Figure S8). One simple example of a 1,9 diazatetracyclo[9.2.2.02,10.03,8]pentadeca-2(10),3,5,7-tetraene (fused indole/quinuclidine) ring-system was found in the scientific literature, whilst eight simple examples were found in the patent literature (references given below in Table S16). To the best of our knowledge no activity against kinases has been reported.

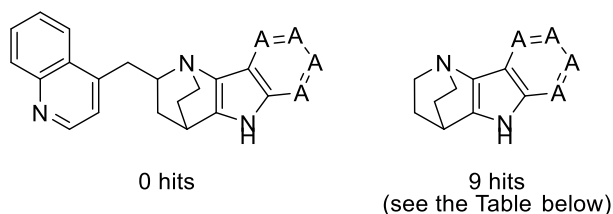

**Figure S8** Substructure searches within CAS.

| Entry | Structure | Reference(s)                                                                                                                                                                                                                                                                                                                                                                                                                                                                                  |
|-------|-----------|-----------------------------------------------------------------------------------------------------------------------------------------------------------------------------------------------------------------------------------------------------------------------------------------------------------------------------------------------------------------------------------------------------------------------------------------------------------------------------------------------|
| 1     |           | <ol style="list-style-type: none"> <li>1. C. Chen, D. R. Lieberman, R. D. Larsen, T. R. Verhoeven, P. J. Reider, <i>J. Org. Chem.</i> <b>1997</b>, <i>62</i>, 2676–2677.</li> <li>2. C. Chen, R. D. Larsen, inventors; Merck &amp; Co., assignee. Palladium catalyzed indolization. <i>US Patent 5,811,551</i>, <b>1998</b>. Filed Aug 7 1997, issued Sept 22 1998.</li> <li>3. M. R. Schrimpf, C.-H. Lee, T. Li, G. A. Gfesser, K. H. Mortell, R. Faghieh, D. L. Nersesian, K. B.</li> </ol> |

| Entry | Structure                                                                           | Reference(s)                                                                                                                                                                                                                                                                         |
|-------|-------------------------------------------------------------------------------------|--------------------------------------------------------------------------------------------------------------------------------------------------------------------------------------------------------------------------------------------------------------------------------------|
|       |                                                                                     | Sippy, W. H. Bunnelle, M. Scanio, L. Shi, M. Gopalakrishnan, D. L. Donnelly-Roberts, M. Hu, inventors; AbbVie Inc., assignee. Indole and indoline derivatives and methods of use thereof. <i>US Patent 9,625,475 (B2)</i> , <b>2017</b> . Filed March 19 2010, issued April 18 2017. |
| 2     | 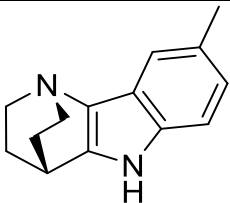   | (see Entry 1, Ref. 3)                                                                                                                                                                                                                                                                |
| 3     |    | (see Entry 1, Ref. 3)                                                                                                                                                                                                                                                                |
| 4     |  | (see Entry 1, Ref. 3)                                                                                                                                                                                                                                                                |
| 5     |  | (see Entry 1, Ref. 3)                                                                                                                                                                                                                                                                |

| Entry | Structure                                                                                                                              | Reference(s)          |
|-------|----------------------------------------------------------------------------------------------------------------------------------------|-----------------------|
| 6     | 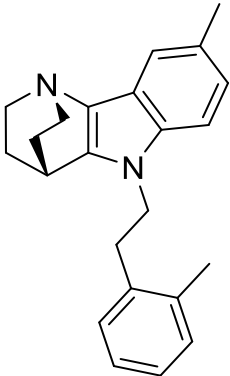<br><chem>Cc1ccc(cc1)CCN2C3CC4C(C2)CCN3C</chem>       | (see Entry 1, Ref. 3) |
| 7     | <br><chem>Cc1ccncc1CCN2C3CC4C(C2)CCN3C</chem>        | (see Entry 1, Ref. 3) |
| 8     | <br><chem>O=S(=O)(c1ccccc1)N2C3CC4C(C2)CCN3C</chem> | (see Entry 1, Ref. 3) |
| 9     | <br><chem>Cc1ccncc1CCN2C3CC4C(C2)CCN3C</chem>       | (see Entry 1, Ref. 3) |

**Table S16** Hits for the substructure search (Figure S8) within Reaxys and SciFinder.



## 5.0 Biological experimental

### 5.1 Cell culture for the autophagy assay

MCF7 cells stably transfected with eGFP-LC3 (MCF7-GFP-LC3) were cultured at 37 °C with 5% CO<sub>2</sub> using Eagle's MEM (Gibco cat# 21090-022) containing 10% FBS (Invitrogen cat# 10500-084), 1% L-Glutamine (Invitrogen cat# 25030-081), 1% sodium pyruvate (PAN Biotech cat# P04-43100), 1% NEAA (PAN Biotech cat# P08-32100), 0.01 mg/mL bovine insulin (Sigma Aldrich cat# I9278) and 200 µg/ml G418 as the medium.

MCF7 wt (#2011) cells were cultured in standard DMEM (PAN Biotech, cat# P04-03500) supplemented with 10% FBS (Invitrogen cat# 10500-084), 1% sodium pyruvate (PAN Biotech, cat# P04-43100), 1% NEAA (PAN Biotech, cat# P08-32100) and 0.01 mg/mL bovine insulin (Sigma Aldrich cat# I9278) at 37 °C with 5% CO<sub>2</sub>.

HeLa, Hek293T and Hek293A EGFP-WIPI2b cells were cultured in standard DMEM (PAN Biotech, cat# P04-03500) supplemented with 10% FBS (Invitrogen cat# 10500-084), 1% sodium pyruvate (PAN Biotech, cat# P04-43100) and 1% NEAA (PAN Biotech, cat# P08-32100) at 37 °C with 5% CO<sub>2</sub>.

HCT8 cells were cultured in Roswell Park Memorial Institute (RPMI) 1640 medium (Sigma-Aldrich, cat# R8758) supplemented with 10% FBS (Invitrogen cat# 10500-084) and 1% NEAA (PAN Biotech, cat# P08-32100) at 37°C with 5% CO<sub>2</sub>.

### 5.2 High-content screening for autophagy inhibitors

For the phenotypic autophagy assay, 4000 MCF7-GFP-LC3 cells per well were seeded in 25 µL medium in a 384 well Greiner µclear plate (cat# 781080, lid cat# 656191) and incubated (37 °C, 5% CO<sub>2</sub>) overnight. Cells were then washed by a plate washer (Biotek, ELx405) three times with 1X PBS followed by a final aspiration of the washing buffer. The addition of 25 nL of compound solution (10 mM stock solution in DMSO) was then carried out with an echo dispenser (Labcyte, Echo 520 dispenser). Addition of medium to induce autophagy was carried out with a Multidrop Combi (Thermo Scientific). 25 µL Earle's Balanced Salt Solution (EBSS, Sigma Aldrich, cat# E3024-500mL) containing 50 µM Chloroquine (Sigma Aldrich, cat# C6628-25g) was used for starvation-induced autophagy and 25 µL medium containing 50 µl Chloroquine and 100 nM Rapamycin (Biomol, cat# Cay13346)-1 was used for rapamycin-induced autophagy screening. After incubation (37 °C, 5% CO<sub>2</sub>) for three hours cells were fixed by addition of 25 µL 1:4 formaldehyde in 1X PBS + 1:500 Hoechst (stock: 1 mg/mL, Sigma Aldrich cat# B2261-25 mg) and incubation for 20 min at

room temperature. Cells were then washed three times with 1X PBS. Four images per well were taken with ImageXpress Micro XL (Molecular Devices) at 20x. Automated image analysis was performed using the granularity setting of MetaXpress Software (Molecular Devices).

### 5.3 Cell painting assay

The described assay closely follows the method described by Bray *et al.*<sup>[14]</sup>

Initially, 5  $\mu$ l U2OS medium were added to each well of a 384-well plate (PerkinElmer CellCarrier-384 Ultra). Subsequently, U2OS cell were seeded with a density of 1600 cells per well in 20  $\mu$ l medium. The plate was incubated for 10 min at the ambient temperature, followed by an additional 4 h incubation (37 °C, 5% CO<sub>2</sub>). Compound treatment was performed with the Echo 520 acoustic dispenser (Labcyte) at final concentrations of 10  $\mu$ M, 3  $\mu$ M or 1  $\mu$ M. Incubation with compound was performed for 20 h (37 °C, 5% CO<sub>2</sub>). Subsequently, mitochondria were stained with Mito Tracker Deep Red (Thermo Fisher Scientific, Cat. No. M22426). The Mito Tracker Deep Red stock solution (1 mM) was diluted to a final concentration of 100 nM in prewarmed medium. The medium was removed from the plate leaving 10  $\mu$ l residual volume and 25  $\mu$ l of the Mito Tracker solution were added to each well. The plate was incubated for 30 min in darkness (37 °C, 5% CO<sub>2</sub>). To fix the cells 7  $\mu$ l of 18.5 % formaldehyde in PBS were added, resulting in a final formaldehyde concentration of 3.7 %. Subsequently, the plate was incubated for another 20 min in darkness (RT) and washed three times with 70  $\mu$ l of PBS. (Biotek Washer Elx405). Cells were permeabilized by addition of 25  $\mu$ l 0.1% Triton X-100 to each well, followed by 15 min incubation (RT) in darkness. The cells were washed three times with PBS leaving a final volume of 10  $\mu$ l. To each well 25  $\mu$ l of a staining solution were added, which contains 1% BSA, 50  $\mu$ l Phalloidin (Alexa594 conjugate, Thermo Fisher Scientific, A12381), 25  $\mu$ g/ml Concanavalin A (Alexa488 conjugate, Thermo Fisher Scientific, Cat. No. C11252), 50  $\mu$ l/ml Hoechst 33342 (Sigma, Cat. No. B2261-25mg), 15  $\mu$ l/ml WGA-Alexa594 conjugate (Thermo Fisher Scientific, Cat. No. W11262) and 0.3  $\mu$ l/ml SYTO 14 solution (Thermo Fisher Scientific, Cat. No. S7576). The plate is incubated for 30 min (RT) in darkness and washed three times with 70  $\mu$ l PBS. After the final washing step the PBS was not aspirated. The plates were sealed and centrifuged for 1 min at 500 rpm.

The plates were prepared in triplicates with shifted layouts to reduce plate effects and imaged using a Micro XL High-Content Screening System (Molecular Devices) in 5 channels (DAPI: Ex350-400/ Em410-480; FITC: Ex470-500/ Em510-540; Spectrum Gold: Ex520-545/ Em560-585; TxRed: Ex535-585/ Em600-650; Cy5: Ex605-650/ Em670-715) with 9 sites per well and 20x magnification (binning 2).

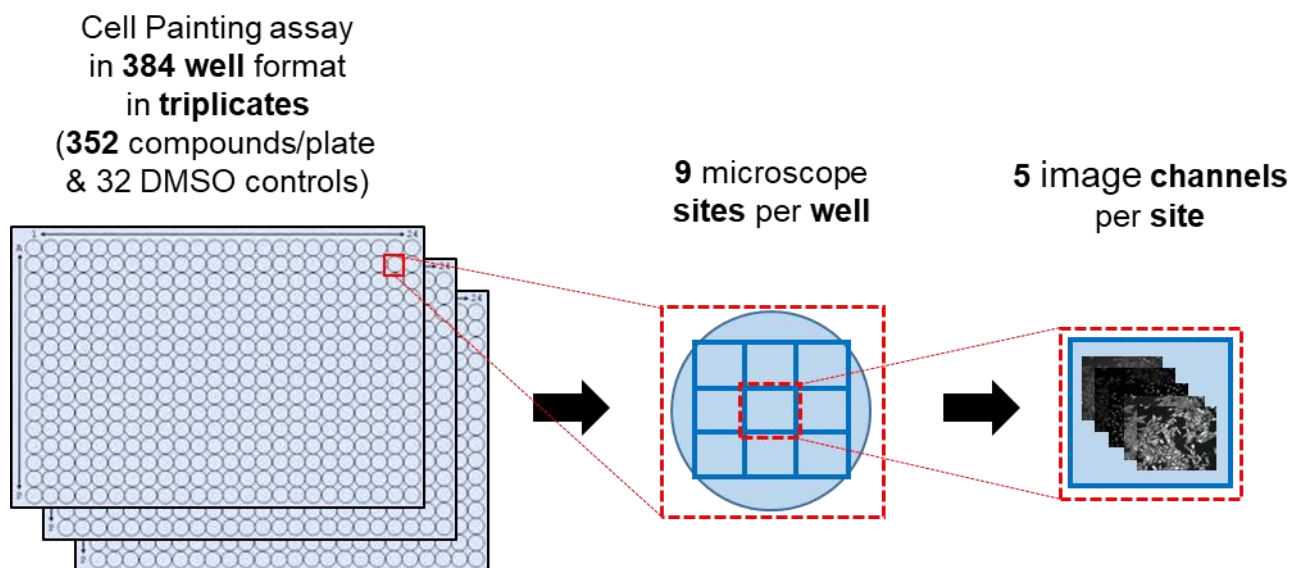

The generated images were processed with the CellProfiler package (<https://cellprofiler.org/>, version 3.0.0, Git commit 235f8251bd8a39b04bc68fa1511d5b5dccb828d5) on a computing cluster of the Max Planck Society to extract 1716 cell features (parameters) per microscope site. The data was then further aggregated as medians per well (9 sites  $\rightarrow$  1 well), then over the three replicates. Further analysis was performed with custom Python (<https://www.python.org/>) scripts using the Pandas (<https://pandas.pydata.org/>) and Dask (<https://dask.org/>) data processing libraries (separate publication to follow).

From the total set of 1716 parameters a subset of highly reproducible and robust parameters was determined using the procedure described by Woehrmann *et al.*<sup>[15]</sup> in the following way: Two biological repeats of one plate containing reference compounds were analysed. For every parameter, its full profile over each whole plate was calculated. If the profiles from the two repeats showed a similarity  $\geq 0.8$  (see below), the parameter was added to the set.

This procedure was only performed once and resulted in a set of 579 robust parameters out of the total of 1716 that was used for all further analyses.

### Determination of reproducible Parameters

|      |                                                                                              |
|------|----------------------------------------------------------------------------------------------|
| 1716 | <i>Determined by CellProfiler</i>                                                            |
| ↓    | <i>Keep parameters that have a minimum correlation of 0.80 between repeats for all cpds.</i> |
| 579  | <i>Final set of relevant parameters. Used for all further analyses</i>                       |

To determine the phenotypic profiles for each test compound Z-scores were then calculated for each parameter as how many times the Median Absolute Deviation (MAD) of the controls the measured parameter value of a test compound deviates from the Median of the controls:

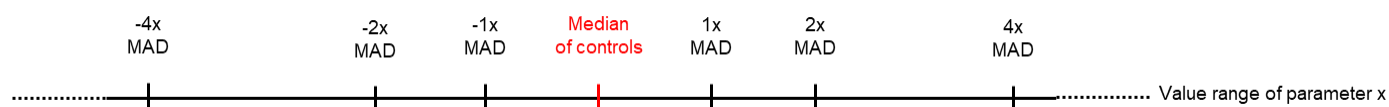

$$z\_score = \frac{value_{meas.} - Median_{Controls}}{MAD_{Controls}}$$

The phenotypic compound profile is then determined as the list of z-scores of all parameters for one compound.

In addition to the phenotypic profile, an induction value was determined for each compound as the fraction of significantly changed parameters, in percent:

$$Induction [\%] = \frac{number\ of\ parameters\ with\ abs.\ values > 3}{total\ number\ of\ parameters}$$

Similarities of phenotypic profiles were calculated from the correlation distances between two profiles

(<https://docs.scipy.org/doc/scipy/reference/generated/scipy.spatial.distance.correlation.html>;

Similarity = 1 - Correlation Distance) and the compounds with the most similar profiles were determined from a set of 3000 reference compounds that was also measured in the assay.

An example for two compounds with highly similar profiles (96% similarity):

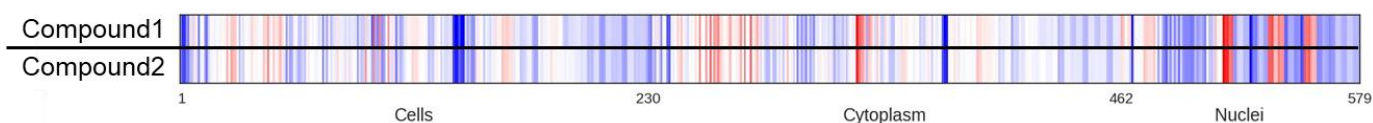

An example for two compounds with low similarity profiles (0% similarity):

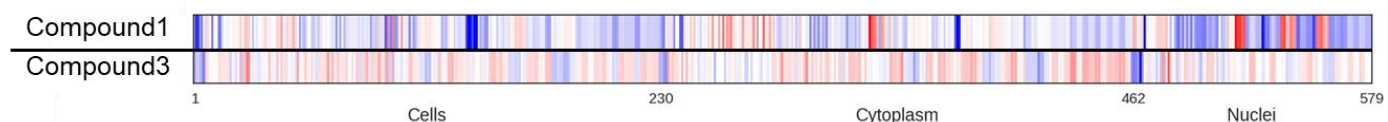

Each colored band represents one Z-score of a parameter.

### 5.3.1 Discussion of the Induction Parameter

The Cell Painting assay is under active development in the department since the beginning of 2017 and the induction was introduced into the analysis as a measure of the extent of the phenotypic effect. The assay is currently being developed in its third iteration.

The first iteration used a very sparse profile of only about hundred features with categorical values (0 – reduced, 1 unchanged, 2 – increased compared to control). The induction was introduced at this stage. The code for this first iteration was described<sup>[16]</sup> and open-sourced<sup>[17]</sup> in 2017.

The second iteration already used a much larger profile with continuous values but was based on single point measurements.

The current third iteration uses 579 features calculated from triplicate measurements with shifted layouts for reduced plate effects. It now uses induction as a measure of how many features of the profile have been significantly changed compared to DMSO controls (induction = 0%, calculation see above), making it a robust and easy to calculate parameter in our hands.

It should be noted that the induction is not a measure of activity per se, but rather of the extent of the observed phenotypic effect.

In our opinion, this is an important distinction to make, since the extent of the effect is not necessarily correlated to compound activity. It rather depends on the compound's target(s) and the extent to which the modulation of these target(s) induce phenotypic effects. In other words, a compound can have a high biological activity on a target that does cause only minor phenotypic changes in the cell and will therefore only have a small induction value. For this case, equating the low induction with low activity would be misleading.

In case by case situations, where compounds have the same target(s) the induction might be used as a proxy parameter for activity and in this context we are using it e.g. for finding concentrations at which the compounds are having a comparable extent of the phenotypic changes.

We also use the induction as a cutoff parameter to decide whether a comparison of a profile to other profiles would make sense. A profile with an induction < 5% we consider being too sparse for a meaningful comparison, whereas a profile with an induction  $\geq$  80% is usually too crowded for a good comparison. In the first case, we re-test the compounds in question at higher doses, in the latter case, we reduce the dose.

A more detailed comparison to other measures of the extent of phenotypic effects, like the Mahalanobis distance to DMSO controls will be part of a larger methodology paper to be written. At that time the code of the current iteration will also be made available.

### 5.3.2 Availability of the cell painting assay code

The code and data analysis are still undergoing method development. A separate Cell Painting methodology paper detailing the finalised code will follow this manuscript. We are willing to share the code and data in its current form upon request.

### 5.3.3 Further discussion and interpretation of the cell painting data

#### Cut-off for common reference compounds

In order for reference compounds to be considered biosimilar in the cell painting assay, we considered the following parameters:

- $\geq 75\%$  biosimilarity in the cell painting profile.
- The following induction range:  $5\% < \% < 80\%$  (see also the discussion in Section 5.3.1).

#### Comparison of terbutaline and SAR405

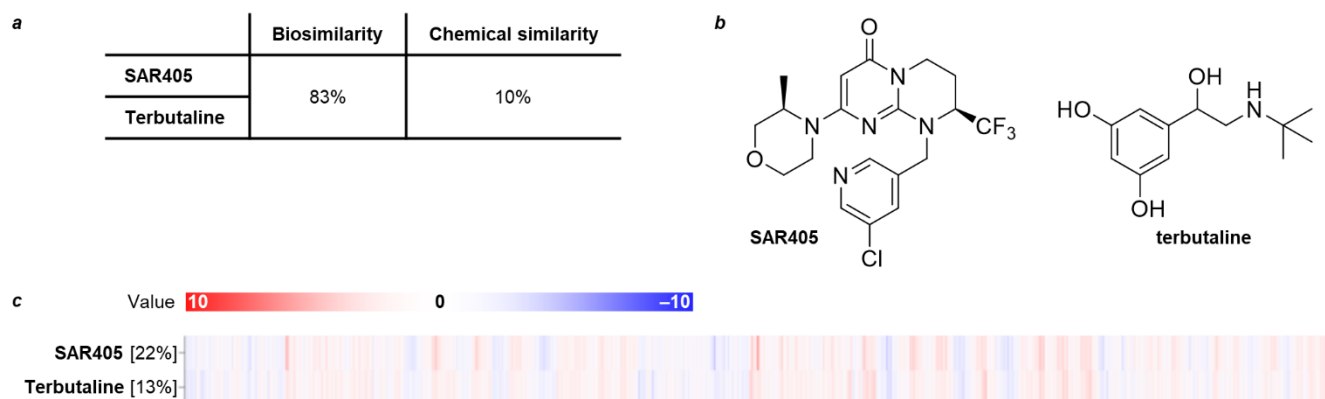

**Figure S9** Comparison of Terbutaline versus SAR405 in the cell painting assay.

The profiles of terbutaline and SAR405 were found to be 83% biosimilar in the cell painting assay, however, terbutaline was inactive in our autophagy screen (see Section 5.2), whereas SAR405 was inhibited both starvation-induced autophagy ( $2.51 \pm 2.3 \mu\text{M}$ ) and rapamycin-induced autophagy ( $1.09 \pm 0.8 \mu\text{M}$ ). While terbutaline is inactive in autophagy, this does not rule out the possibility that it is a weak VPS34 inhibitor. We also note that similar phenotypes can be induced in the cell painting assay by interference with different biological processes.

### 5.3.4 Comparison of azaquindole-1 with other recently identified autophagy inhibitors

We compared the cell painting fingerprint of azaquindole-1 (**10w-j**) against other autophagy inhibitors that were recently identified in the Waldmann laboratory. The compounds in the study are summarised in Figure S10, and the profiles of the compounds that showed biosimilarity to azaquindole-1 are shown in Figure S11.

| structure | name                                   | mode of action                                    | autophagy inhibition                                                                                                 |
|-----------|----------------------------------------|---------------------------------------------------|----------------------------------------------------------------------------------------------------------------------|
|           | <b>azaquindole-1</b><br>(from quinine) | VPS34 inhibitor                                   | SIA: $0.04 \pm 0.02 \mu\text{M}$<br>RIA: $0.10 \pm 0.02 \mu\text{M}$<br>VPS34 IC <sub>50</sub> : $0.35 \mu\text{M}$  |
|           | <b>oxautin-1</b><br>(from quinidine)   | lysosomotropic and Fe <sup>2+</sup> sequestration | SIA: $0.65 \pm 0.22 \mu\text{M}$<br>RIA: inactive                                                                    |
|           | <b>autoquin</b><br>(from quinidine)    | lysosomotropic and Fe <sup>2+</sup> sequestration | SIA: $0.56 \pm 0.15 \mu\text{M}$<br>RIA: inactive                                                                    |
|           | <b>autophinib</b>                      | VPS34 inhibitor                                   | SIA: $0.09 \pm 0.04 \mu\text{M}$<br>RIA: $0.04 \pm 0.01 \mu\text{M}$<br>VPS34 IC <sub>50</sub> : $0.019 \mu\text{M}$ |
|           | <b>aumitin</b>                         | inhibits mitochondrial complex I                  | SIA: $0.12 \pm 0.07 \mu\text{M}$<br>RIA: $0.24 \pm 0.20 \mu\text{M}$                                                 |
|           | <b>DMP-1</b>                           | tbd                                               | SIA: $1.3 \pm 0.5 \mu\text{M}$<br>RIA: inactive                                                                      |
|           | <b>autogramin-1</b>                    | GRAMD1A inhibitor                                 | SIA: $0.17 \pm 0.05 \mu\text{M}$<br>RIA: $0.44 \pm 0.30 \mu\text{M}$                                                 |

**Figure S10** Autophagy inhibitors identified in the Waldmann group, including: azaquindole-1 (this work), oxautin-1<sup>[18]</sup>, autoquin<sup>[19]</sup>, autophinib,<sup>[20]</sup> aumitin,<sup>[2]</sup> DMP-1,<sup>[21]</sup> autogramin-1<sup>[22]</sup>. SIA= starvation-induced autophagy. RIA= rapamycin-induced autophagy.

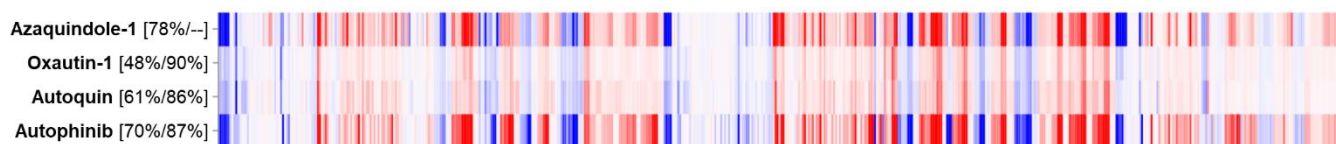

**Figure S11** Comparison of the cell painting fingerprint of azaquindole-1 (**10w-j**) with the remaining compounds shown in Figure S10. In the square parentheses are detailed firstly the induction, and secondly (after the forward slash), the biosimilarity of the profile to azaquindole-1.

Our analysis revealed that the profile of azaquindole-1 (**10w-j**) is similar to the profiles of oxautin-1, autoquin and autophinib. Since these compounds emerged from our internal research programmes, they were not included in the original reference compound collection used to identify the target of azaquindole-1.

Notably, autophinib is an inhibitor of VPS34. The cell painting analysis therefore further validates our earlier finding that autophinib targets VPS34. This finding also highlights the ability of the cell painting assay data to suggest and subsequently identify molecular targets. However, oxautin-1 and autoquin do not inhibit VPS34. This suggests that in these cases the profile represents the bioactivity and mode of action in a broader sense. Thus, the cell painting assay may be a good experimental means to identify clusters of compounds with similar modes of action, but not necessarily the same targets. We intend to investigate these insights more thoroughly to determine whether such clusters exist in autophagy in a wider sense, and in other areas of biology.



## 5.4 $\beta$ -Adrenergic receptor screening

Detection of the functional inhibition or activation of beta-1 and beta-2 adrenoreceptors was carried out by Eurofins CEREP SA (France). A functional, cell-based assay with Homogeneous Time Resolved Fluorescence (HTRF) read out was performed in agonist and antagonist mode at a concentration of 10  $\mu$ M of azaquindole-1 (**10w-j**) or **10w-d**.

Information on how each assay was completed can be found using the following link (or otherwise contact the authors of this manuscript):

- <https://www.eurofinsdiscoveryservices.com/catalogmanagement/viewitem/beta1-Human-Adrenoceptor-GPCR-Cell-Based-Agonist-cAMP-Assay-Cerep/1605>
- <https://www.eurofinsdiscoveryservices.com/catalogmanagement/viewitem/beta1-Human-Adrenoceptor-GPCR-Cell-Based-Antagonist-cAMP-Assay-Cerep/1606>
- <https://www.eurofinsdiscoveryservices.com/catalogmanagement/viewitem/beta2-Human-Adrenoceptor-GPCR-Cell-Based-Agonist-cAMP-Assay-Cerep/1976>
- <https://www.eurofinsdiscoveryservices.com/catalogmanagement/viewitem/beta2-Human-Adrenoceptor-GPCR-Cell-Based-Antagonist-cAMP-Assay-Cerep/1977>

(all last accessed 12/16/2019)

**Table S17** *In vitro* inhibition of  $\beta$  Adrenergic receptors by azaquindoles. Compounds screened at 10  $\mu$ M in all assays.

| Assay                          | Compound     | Measurement      | Value /%  |
|--------------------------------|--------------|------------------|-----------|
| beta 1 (h) (agonist effect)    | <b>10w-j</b> | Mean %Effect     | -7.43E-01 |
| beta 1 (h) (agonist effect)    | <b>10w-d</b> | Mean %Effect     | -1.20E+00 |
| beta 1 (h) (antagonist effect) | <b>10w-j</b> | Mean %Inhibition | 8.60183   |
| beta 1 (h) (antagonist effect) | <b>10w-d</b> | Mean %Inhibition | -1.42E+01 |
| beta 2 (h) (agonist effect)    | <b>10w-j</b> | Mean %Effect     | 2.83625   |
| beta 2 (h) (agonist effect)    | <b>10w-d</b> | Mean %Effect     | 3.5587    |
| beta 2 (h) (antagonist effect) | <b>10w-j</b> | Mean %Inhibition | 22.0743   |
| beta 2 (h) (antagonist effect) | <b>10w-d</b> | Mean %Inhibition | 0.10949   |

## 5.5 Kinase panel data

Detection of the biochemical inhibition of 485 kinases was carried out by Life Technologies Ltd (United Kingdom). The screen was performed in three different assays formats: Adapta (activity-based), Z-Lyte (activity-based) and Lantha (binding-based) at a concentration of 10  $\mu$ M of azaquindole-1 (**10w-j**).

Information on how each assay was completed can be found using the following link (or otherwise contact the authors of this manuscript): <https://www.thermofisher.com/nz/en/home/products-and-services/services/custom-services/screening-and-profiling-services/selectscreen-profiling-service/selectscreen-kinase-profiling-service.html> (last accessed 07/06/2019).

For kinases showing >40% inhibition, an IC<sub>50</sub> was determined.

**Table S18** *In vitro* inhibition of kinases by azaquindole-1.

| Entry | Kinase              | Technology | ATP    | % Inhibition |     | % Inhibition mean | IC50 / nM |
|-------|---------------------|------------|--------|--------------|-----|-------------------|-----------|
|       |                     |            |        | 1            | 2   |                   |           |
| 1     | AAK1                | Lantha     | n/a    | 3            | 6   | 4                 |           |
| 2     | ABL1                | ZLYTE      | Km app | 2            | 2   | 2                 |           |
| 3     | ABL1 E255K          | ZLYTE      | Km app | 7            | 8   | 8                 |           |
| 4     | ABL1 F317I          | ZLYTE      | Km app | 1            | 1   | 1                 |           |
| 5     | ABL1 F317L          | ZLYTE      | Km app | 7            | 0   | 3                 |           |
| 6     | ABL1 G250E          | ZLYTE      | Km app | 2            | 1   | 2                 |           |
| 7     | ABL1 H396P          | Lantha     | n/a    | -7           | 2   | -3                |           |
| 8     | ABL1 M351T          | Lantha     | n/a    | 9            | 16  | 13                |           |
| 9     | ABL1 Q252H          | Lantha     | n/a    | -1           | -20 | -11               |           |
| 10    | ABL1 T315I          | ZLYTE      | Km app | 5            | 3   | 4                 |           |
| 11    | ABL1 Y253F          | ZLYTE      | Km app | 2            | 1   | 2                 |           |
| 12    | ABL2 (Arg)          | ZLYTE      | Km app | 2            | 2   | 2                 |           |
| 13    | ACVR1 (ALK2)        | Lantha     | n/a    | 3            | 5   | 4                 |           |
| 14    | ACVR1 (ALK2) R206H  | Lantha     | n/a    | 38           | 44  | 41                | >10000    |
| 15    | ACVR1B (ALK4)       | ZLYTE      | Km app | -8           | -3  | -5                |           |
| 16    | ACVR2A              | Lantha     | n/a    | -33          | -8  | -20               |           |
| 17    | ACVR2B              | Lantha     | n/a    | -7           | 6   | 0                 |           |
| 18    | ACVRL1 (ALK1)       | Lantha     | n/a    | -3           | -13 | -8                |           |
| 19    | ADCK3               | Lantha     | n/a    | 33           | 34  | 33                |           |
| 20    | ADRBK1 (GRK2)       | ZLYTE      | Km app | 1            | -7  | -3                |           |
| 21    | ADRBK2 (GRK3)       | ZLYTE      | Km app | 8            | 7   | 7                 |           |
| 22    | AKT1 (PKB alpha)    | ZLYTE      | Km app | 55           | 60  | 58                | >10000    |
| 23    | AKT2 (PKB beta)     | ZLYTE      | Km app | 13           | 17  | 15                |           |
| 24    | AKT3 (PKB gamma)    | ZLYTE      | Km app | 12           | 9   | 11                |           |
| 25    | ALK                 | ZLYTE      | Km app | 10           | -3  | 4                 |           |
| 26    | ALK C1156Y          | Lantha     | n/a    | -3           | 1   | -1                |           |
| 27    | ALK F1174L          | Lantha     | n/a    | -13          | -1  | -7                |           |
| 28    | ALK L1196M          | Lantha     | n/a    | -1           | -18 | -9                |           |
| 29    | ALK R1275Q          | Lantha     | n/a    | 10           | 10  | 10                |           |
| 30    | ALK T1151_L1152insT | Lantha     | n/a    | -13          | -10 | -12               |           |

| Entry | Kinase                 | Technology | ATP    | % Inhibition |     | % Inhibition mean | IC50 / nM |
|-------|------------------------|------------|--------|--------------|-----|-------------------|-----------|
|       |                        |            |        | 1            | 2   |                   |           |
| 31    | AMPK (A1/B1/G2)        | Lantha     | n/a    | 4            | -2  | 1                 |           |
| 32    | AMPK (A1/B1/G3)        | Lantha     | n/a    | 0            | -4  | -2                |           |
| 33    | AMPK (A1/B2/G1)        | Lantha     | n/a    | -3           | 3   | 0                 |           |
| 34    | AMPK (A1/B2/G2)        | ZLYTE      | Km app | -1           | 3   | 1                 |           |
| 35    | AMPK (A1/B2/G3)        | ZLYTE      | Km app | -2           | 6   | 2                 |           |
| 36    | AMPK (A2/B1/G2)        | ZLYTE      | Km app | 6            | 3   | 5                 |           |
| 37    | AMPK (A2/B1/G3)        | ZLYTE      | Km app | 8            | 12  | 10                |           |
| 38    | AMPK (A2/B2/G1)        | Lantha     | n/a    | -2           | -4  | -3                |           |
| 39    | AMPK (A2/B2/G2)        | Lantha     | n/a    | 1            | 2   | 1                 |           |
| 40    | AMPK (A2/B2/G3)        | ZLYTE      | Km app | 8            | 8   | 8                 |           |
| 41    | AMPK A1/B1/G1          | ZLYTE      | Km app | 22           | 24  | 23                |           |
| 42    | AMPK A2/B1/G1          | ZLYTE      | Km app | 14           | 15  | 15                |           |
| 43    | ANKK1                  | Lantha     | n/a    | 5            | 11  | 8                 |           |
| 44    | AURKA (Aurora A)       | ZLYTE      | Km app | 3            | 5   | 4                 |           |
| 45    | AURKB (Aurora B)       | ZLYTE      | Km app | 3            | 6   | 4                 |           |
| 46    | AURKC (Aurora C)       | ZLYTE      | Km app | 8            | 5   | 6                 |           |
| 47    | AXL                    | ZLYTE      | Km app | 3            | 3   | 3                 |           |
| 48    | AXL R499C              | Lantha     | n/a    | -29          | -34 | -31               |           |
| 49    | BLK                    | ZLYTE      | Km app | 0            | 4   | 2                 |           |
| 50    | BMPR1A (ALK3)          | Lantha     | n/a    | 16           | 17  | 16                |           |
| 51    | BMPR1B (ALK6)          | Lantha     | n/a    | 1            | -3  | -1                |           |
| 52    | BMPR2                  | Lantha     | n/a    | 0            | 3   | 2                 |           |
| 53    | BMX                    | ZLYTE      | Km app | -7           | -6  | -7                |           |
| 54    | BRAF                   | ZLYTE      | 100    | 27           | 19  | 23                |           |
| 55    | BRAF                   | Lantha     | n/a    | -5           | -2  | -3                |           |
| 56    | BRAF V599E             | ZLYTE      | 100    | -2           | -9  | -5                |           |
| 57    | BRAF V599E             | Lantha     | n/a    | 4            | 6   | 5                 |           |
| 58    | BRSK1 (SAD1)           | ZLYTE      | Km app | 22           | 23  | 23                |           |
| 59    | BRSK2                  | Lantha     | n/a    | -14          | -36 | -25               |           |
| 60    | BTK                    | ZLYTE      | Km app | 6            | 6   | 6                 |           |
| 61    | CAMK1 (CaMK1)          | Adapta     | 10     | -11          | -9  | -10               |           |
| 62    | CAMK1D (CaMKI delta)   | ZLYTE      | Km app | 6            | 6   | 6                 |           |
| 63    | CAMK1G (CaMKI gamma)   | ZLYTE      | Km app | 0            | 0   | 0                 |           |
| 64    | CAMK2A (CaMKII alpha)  | ZLYTE      | Km app | 4            | 4   | 4                 |           |
| 65    | CAMK2B (CaMKII beta)   | ZLYTE      | Km app | -5           | -4  | -5                |           |
| 66    | CAMK2D (CaMKII delta)  | ZLYTE      | Km app | 7            | 9   | 8                 |           |
| 67    | CAMK2G (CaMKII gamma)  | Lantha     | n/a    | -5           | -11 | -8                |           |
| 68    | CAMK4 (CaMKIV)         | ZLYTE      | Km app | 4            | 6   | 5                 |           |
| 69    | CAMKK1 (CaMKKA)        | Lantha     | n/a    | -8           | -8  | -8                |           |
| 70    | CAMKK2 (CaMKK beta)    | Lantha     | n/a    | 15           | 17  | 16                |           |
| 71    | CASK                   | Lantha     | n/a    | -5           | -2  | -4                |           |
| 72    | CDC42 BPA (MRCKA)      | ZLYTE      | Km app | 4            | 4   | 4                 |           |
| 73    | CDC42 BPB (MRCKB)      | ZLYTE      | Km app | 2            | 1   | 1                 |           |
| 74    | CDC42 BPG (MRCKG)      | ZLYTE      | Km app | -2           | 3   | 1                 |           |
| 75    | CDC7/DBF4              | Lantha     | n/a    | 7            | 3   | 5                 |           |
| 76    | CDK1/cyclin B          | ZLYTE      | Km app | 1            | -1  | 0                 |           |
| 77    | CDK11 (Inactive)       | Lantha     | n/a    | 14           | 8   | 11                |           |
| 78    | CDK11/cyclin C         | Lantha     | n/a    | 4            | -7  | -2                |           |
| 79    | CDK13/cyclin K         | Lantha     | n/a    | -2           | 8   | 3                 |           |
| 80    | CDK14 (PFTK1)/cyclin Y | Lantha     | n/a    | -11          | -23 | -17               |           |
| 81    | CDK16 (PCTK1)/cyclin Y | Lantha     | n/a    | -26          | -5  | -15               |           |
| 82    | CDK17/cyclin Y         | ZLYTE      | Km app | 1            | 3   | 2                 |           |

| Entry | Kinase                     | Technology | ATP    | % Inhibition |     | % Inhibition mean | IC50 / nM |
|-------|----------------------------|------------|--------|--------------|-----|-------------------|-----------|
|       |                            |            |        | 1            | 2   |                   |           |
| 83    | CDK18/cyclin Y             | ZLYTE      | Km app | -11          | 8   | -1                |           |
| 84    | CDK2/cyclin A              | ZLYTE      | Km app | 0            | 5   | 2                 |           |
| 85    | CDK2/cyclin A1             | Lantha     | n/a    | 0            | 1   | 1                 |           |
| 86    | CDK2/cyclin E1             | Lantha     | n/a    | 1            | -1  | 0                 |           |
| 87    | CDK2/cyclin O              | Lantha     | n/a    | -1           | 3   | 1                 |           |
| 88    | CDK3/cyclin E1             | Lantha     | n/a    | -9           | -8  | -9                |           |
| 89    | CDK4/cyclin D1             | Adapta     | 10     | -13          | -12 | -13               |           |
| 90    | CDK4/cyclin D3             | Adapta     | 10     | 11           | 8   | 10                |           |
| 91    | CDK5 (Inactive)            | Lantha     | n/a    | -7           | -11 | -9                |           |
| 92    | CDK5/p25                   | ZLYTE      | Km app | -4           | 7   | 1                 |           |
| 93    | CDK5/p35                   | ZLYTE      | Km app | -1           | 6   | 3                 |           |
| 94    | CDK6/cyclin D1             | Adapta     | 10     | -14          | -20 | -17               |           |
| 95    | CDK7/cyclin H/MNAT1        | Adapta     | Km app | 12           | 6   | 9                 |           |
| 96    | CDK8/cyclin C              | Lantha     | n/a    | 14           | 15  | 14                |           |
| 97    | CDK9 (Inactive)            | Lantha     | n/a    | -7           | -15 | -11               |           |
| 98    | CDK9/cyclin K              | Lantha     | n/a    | -3           | 6   | 2                 |           |
| 99    | CDK9/cyclin T1             | Adapta     | Km app | 20           | 21  | 20                |           |
| 100   | CDKL5                      | ZLYTE      | Km app | 5            | 11  | 8                 |           |
| 101   | CHEK1 (CHK1)               | ZLYTE      | Km app | -1           | -8  | -4                |           |
| 102   | CHEK2 (CHK2)               | ZLYTE      | Km app | 21           | 11  | 16                |           |
| 103   | CHUK (IKK alpha)           | Adapta     | Km app | 9            | 6   | 7                 |           |
| 104   | CLK1                       | ZLYTE      | Km app | 15           | 12  | 13                |           |
| 105   | CLK2                       | ZLYTE      | Km app | 51           | 44  | 47                | 572       |
| 106   | CLK3                       | ZLYTE      | Km app | 2            | 4   | 3                 |           |
| 107   | CLK4                       | Lantha     | n/a    | 78           | 83  | 81                | 93.9      |
| 108   | CSF1R (FMS)                | ZLYTE      | Km app | 12           | 7   | 10                |           |
| 109   | CSK                        | ZLYTE      | Km app | -8           | 2   | -3                |           |
| 110   | CSNK1A1 (CK1 alpha 1)      | ZLYTE      | Km app | -9           | -5  | -7                |           |
| 111   | CSNK1A1L                   | ZLYTE      | Km app | 1            | 3   | 2                 |           |
| 112   | CSNK1D (CK1 delta)         | ZLYTE      | Km app | 9            | 5   | 7                 |           |
| 113   | CSNK1E (CK1 epsilon)       | ZLYTE      | Km app | 7            | 3   | 5                 |           |
| 114   | CSNK1E (CK1 epsilon) R178C | ZLYTE      | Km app | 4            | 4   | 4                 |           |
| 115   | CSNK1G1 (CK1 gamma 1)      | ZLYTE      | Km app | -3           | 7   | 2                 |           |
| 116   | CSNK1G2 (CK1 gamma 2)      | ZLYTE      | Km app | 10           | 11  | 11                |           |
| 117   | CSNK1G3 (CK1 gamma 3)      | ZLYTE      | Km app | 25           | 5   | 15                |           |
| 118   | CSNK2A1 (CK2 alpha 1)      | ZLYTE      | Km app | 8            | 4   | 6                 |           |
| 119   | CSNK2A2 (CK2 alpha 2)      | ZLYTE      | Km app | 9            | 1   | 5                 |           |
| 120   | DAPK1                      | Adapta     | Km app | 12           | 7   | 9                 |           |
| 121   | DAPK2                      | Lantha     | n/a    | -34          | -21 | -27               |           |
| 122   | DAPK3 (ZIPK)               | ZLYTE      | Km app | 1            | -1  | 0                 |           |
| 123   | DCAMKL1 (DCLK1)            | ZLYTE      | Km app | 6            | 6   | 6                 |           |
| 124   | DCAMKL2 (DCK2)             | ZLYTE      | Km app | 6            | 3   | 4                 |           |
| 125   | DDR1                       | Lantha     | n/a    | -3           | 0   | -1                |           |
| 126   | DDR2                       | Lantha     | n/a    | 10           | 20  | 15                |           |
| 127   | DDR2 N456S                 | Lantha     | n/a    | -32          | -9  | -20               |           |
| 128   | DDR2 T654M                 | Lantha     | n/a    | 14           | 16  | 15                |           |
| 129   | DMPK                       | Lantha     | n/a    | 5            | 5   | 5                 |           |
| 130   | DNA-PK                     | ZLYTE      | Km app | 1            | 9   | 5                 |           |
| 131   | DYRK1A                     | ZLYTE      | Km app | 24           | 23  | 24                |           |
| 132   | DYRK1B                     | ZLYTE      | Km app | 11           | 16  | 13                |           |
| 133   | DYRK2                      | Lantha     | n/a    | 1            | 3   | 2                 |           |
| 134   | DYRK3                      | ZLYTE      | Km app | -9           | -10 | -10               |           |

| Entry | Kinase                         | Technology | ATP    | % Inhibition |     | % Inhibition mean | IC50 / nM |
|-------|--------------------------------|------------|--------|--------------|-----|-------------------|-----------|
|       |                                |            |        | 1            | 2   |                   |           |
| 135   | DYRK4                          | ZLYTE      | Km app | 5            | 3   | 4                 |           |
| 136   | EEF2K                          | ZLYTE      | Km app | 1            | 2   | 2                 |           |
| 137   | EGFR (ErbB1)                   | ZLYTE      | Km app | -11          | 4   | -4                |           |
| 138   | EGFR (ErbB1) C797S             | ZLYTE      | Km app | 1            | -1  | 0                 |           |
| 139   | EGFR (ErbB1) d746-750          | Lantha     | n/a    | -11          | -2  | -6                |           |
| 140   | EGFR (ErbB1) d747-749 A750P    | Lantha     | n/a    | -7           | -14 | -11               |           |
| 141   | EGFR (ErbB1) G719C             | ZLYTE      | Km app | -3           | -5  | -4                |           |
| 142   | EGFR (ErbB1) G719S             | ZLYTE      | Km app | -3           | 0   | -2                |           |
| 143   | EGFR (ErbB1) L858R             | ZLYTE      | Km app | -16          | 4   | -6                |           |
| 144   | EGFR (ErbB1) L861Q             | ZLYTE      | Km app | 4            | 0   | 2                 |           |
| 145   | EGFR (ErbB1) T790M             | ZLYTE      | Km app | 3            | 1   | 2                 |           |
| 146   | EGFR (ErbB1) T790M C797S L858R | ZLYTE      | Km app | -2           | -1  | -2                |           |
| 147   | EGFR (ErbB1) T790M L858R       | ZLYTE      | Km app | -1           | 1   | 0                 |           |
| 148   | EIF2AK2 (PKR)                  | Lantha     | n/a    | -9           | 3   | -3                |           |
| 149   | EPHA1                          | ZLYTE      | Km app | 7            | -1  | 3                 |           |
| 150   | EPHA2                          | ZLYTE      | Km app | -6           | -6  | -6                |           |
| 151   | EPHA3                          | Lantha     | n/a    | -5           | -1  | -3                |           |
| 152   | EPHA4                          | ZLYTE      | Km app | 10           | 14  | 12                |           |
| 153   | EPHA5                          | ZLYTE      | Km app | -1           | 2   | 0                 |           |
| 154   | EPHA6                          | Lantha     | n/a    | -2           | 10  | 4                 |           |
| 155   | EPHA7                          | Lantha     | n/a    | -2           | 12  | 5                 |           |
| 156   | EPHA8                          | ZLYTE      | Km app | 3            | 5   | 4                 |           |
| 157   | EPHB1                          | ZLYTE      | Km app | -1           | 5   | 2                 |           |
| 158   | EPHB2                          | ZLYTE      | Km app | -1           | -4  | -3                |           |
| 159   | EPHB3                          | ZLYTE      | Km app | 10           | 8   | 9                 |           |
| 160   | EPHB4                          | ZLYTE      | Km app | 0            | -3  | -1                |           |
| 161   | ERBB2 (HER2)                   | ZLYTE      | Km app | 3            | 1   | 2                 |           |
| 162   | ERBB4 (HER4)                   | ZLYTE      | Km app | -8           | -4  | -6                |           |
| 163   | ERN1                           | Lantha     | n/a    | -5           | -20 | -13               |           |
| 164   | ERN2                           | Lantha     | n/a    | 4            | 3   | 4                 |           |
| 165   | FER                            | ZLYTE      | Km app | 6            | 9   | 8                 |           |
| 166   | FES (FPS)                      | ZLYTE      | Km app | 8            | 10  | 9                 |           |
| 167   | FGFR1                          | ZLYTE      | Km app | -3           | -4  | -4                |           |
| 168   | FGFR1 V561M                    | Lantha     | n/a    | 10           | 7   | 9                 |           |
| 169   | FGFR2                          | ZLYTE      | Km app | -10          | -11 | -11               |           |
| 170   | FGFR2 N549H                    | ZLYTE      | Km app | 1            | -4  | -2                |           |
| 171   | FGFR3                          | ZLYTE      | Km app | -2           | -4  | -3                |           |
| 172   | FGFR3 G697C                    | Lantha     | n/a    | -22          | -21 | -21               |           |
| 173   | FGFR3 K650E                    | ZLYTE      | Km app | -6           | -4  | -5                |           |
| 174   | FGFR3 K650M                    | Lantha     | n/a    | 6            | 4   | 5                 |           |
| 175   | FGFR3 V555M                    | ZLYTE      | Km app | -11          | 8   | -1                |           |
| 176   | FGFR4                          | ZLYTE      | Km app | 9            | 3   | 6                 |           |
| 177   | FGR                            | ZLYTE      | Km app | 15           | 15  | 15                |           |
| 178   | FLT1 (VEGFR1)                  | ZLYTE      | Km app | -3           | 2   | 0                 |           |
| 179   | FLT3                           | ZLYTE      | Km app | 12           | 13  | 13                |           |
| 180   | FLT3 D835Y                     | ZLYTE      | Km app | 5            | 5   | 5                 |           |
| 181   | FLT3 ITD                       | Lantha     | n/a    | -52          | -59 | -55               |           |
| 182   | FLT4 (VEGFR3)                  | ZLYTE      | Km app | -6           | 1   | -2                |           |
| 183   | FRAP1 (mTOR)                   | ZLYTE      | Km app | 11           | 5   | 8                 |           |
| 184   | FRK (PTK5)                     | ZLYTE      | Km app | 5            | 3   | 4                 |           |
| 185   | FYN                            | ZLYTE      | Km app | 3            | 0   | 2                 |           |
| 186   | FYN A                          | Lantha     | n/a    | 2            | 9   | 6                 |           |

| Entry | Kinase              | Technology | ATP    | % Inhibition |     | % Inhibition mean | IC50 / nM |
|-------|---------------------|------------|--------|--------------|-----|-------------------|-----------|
|       |                     |            |        | 1            | 2   |                   |           |
| 187   | GAK                 | Lantha     | n/a    | -3           | 16  | 6                 |           |
| 188   | GRK1                | Lantha     | n/a    | 7            | -4  | 2                 |           |
| 189   | GRK4                | ZLYTE      | Km app | 9            | 8   | 9                 |           |
| 190   | GRK5                | ZLYTE      | Km app | 3            | -4  | 0                 |           |
| 191   | GRK6                | ZLYTE      | Km app | 2            | 7   | 5                 |           |
| 192   | GRK7                | ZLYTE      | Km app | 3            | -5  | -1                |           |
| 193   | GSG2 (Haspin)       | Adapta     | Km app | 23           | 24  | 24                |           |
| 194   | GSK3A (GSK3 alpha)  | ZLYTE      | Km app | 5            | 3   | 4                 |           |
| 195   | GSK3B (GSK3 beta)   | ZLYTE      | Km app | 12           | 11  | 12                |           |
| 196   | HCK                 | ZLYTE      | Km app | 1            | 9   | 5                 |           |
| 197   | HIPK1 (Myak)        | ZLYTE      | Km app | 0            | 0   | 0                 |           |
| 198   | HIPK2               | ZLYTE      | Km app | 3            | 3   | 3                 |           |
| 199   | HIPK3 (YAK1)        | ZLYTE      | Km app | 1            | 3   | 2                 |           |
| 200   | HIPK4               | ZLYTE      | Km app | -5           | -9  | -7                |           |
| 201   | HUNK                | Lantha     | n/a    | -10          | 1   | -4                |           |
| 202   | ICK                 | Lantha     | n/a    | -2           | 16  | 7                 |           |
| 203   | IGF1R               | ZLYTE      | Km app | -7           | -7  | -7                |           |
| 204   | IKBKB (IKK beta)    | ZLYTE      | Km app | -1           | 0   | 0                 |           |
| 205   | IKBKE (IKK epsilon) | ZLYTE      | Km app | 8            | 15  | 12                |           |
| 206   | INSR                | ZLYTE      | Km app | 4            | 4   | 4                 |           |
| 207   | INSRR (IRR)         | ZLYTE      | Km app | 4            | 10  | 7                 |           |
| 208   | IRAK1               | Adapta     | Km app | 16           | 19  | 17                |           |
| 209   | IRAK3               | Lantha     | n/a    | -10          | -3  | -7                |           |
| 210   | IRAK4               | ZLYTE      | Km app | 4            | 5   | 4                 |           |
| 211   | ITK                 | ZLYTE      | Km app | 6            | 2   | 4                 |           |
| 212   | JAK1                | ZLYTE      | Km app | -7           | -6  | -6                |           |
| 213   | JAK2                | ZLYTE      | Km app | 10           | 1   | 5                 |           |
| 214   | JAK2 JH1 JH2        | ZLYTE      | Km app | -15          | -19 | -17               |           |
| 215   | JAK2 JH1 JH2 V617F  | ZLYTE      | Km app | 1            | -5  | -2                |           |
| 216   | JAK3                | ZLYTE      | Km app | 3            | -1  | 1                 |           |
| 217   | KDR (VEGFR2)        | ZLYTE      | Km app | 9            | 11  | 10                |           |
| 218   | KIT                 | ZLYTE      | Km app | 7            | 13  | 10                |           |
| 219   | KIT A829P           | Lantha     | n/a    | -8           | -11 | -10               |           |
| 220   | KIT D816H           | Lantha     | n/a    | -8           | 4   | -2                |           |
| 221   | KIT D816V           | Lantha     | n/a    | -7           | -6  | -6                |           |
| 222   | KIT D820E           | Lantha     | n/a    | 8            | 9   | 9                 |           |
| 223   | KIT N822K           | Lantha     | n/a    | -1           | 0   | -1                |           |
| 224   | KIT T670E           | Lantha     | n/a    | -5           | -4  | -4                |           |
| 225   | KIT T670I           | ZLYTE      | Km app | -4           | -14 | -9                |           |
| 226   | KIT V559D           | ZLYTE      | Km app | -9           | -2  | -6                |           |
| 227   | KIT V559D T670I     | Lantha     | n/a    | 3            | -12 | -5                |           |
| 228   | KIT V559D V654A     | ZLYTE      | Km app | 12           | -5  | 4                 |           |
| 229   | KIT V560G           | ZLYTE      | Km app | -6           | -6  | -6                |           |
| 230   | KIT V654A           | Lantha     | n/a    | -1           | 0   | 0                 |           |
| 231   | KIT Y823D           | Lantha     | n/a    | -4           | -6  | -5                |           |
| 232   | KSR2                | ZLYTE      | Km app | 8            | 11  | 9                 |           |
| 233   | LATS2               | Lantha     | n/a    | -5           | 3   | -1                |           |
| 234   | LCK                 | ZLYTE      | Km app | -16          | -3  | -10               |           |
| 235   | LIMK1               | Lantha     | n/a    | 4            | 0   | 2                 |           |
| 236   | LIMK2               | Lantha     | n/a    | -3           | 4   | 1                 |           |
| 237   | LRRK2               | Adapta     | Km app | -8           | -4  | -6                |           |
| 238   | LRRK2 FL            | Adapta     | Km app | -1           | -5  | -3                |           |

| Entry | Kinase                       | Technology | ATP    | % Inhibition |     | % Inhibition mean | IC50 / nM |
|-------|------------------------------|------------|--------|--------------|-----|-------------------|-----------|
|       |                              |            |        | 1            | 2   |                   |           |
| 239   | LRRK2 G2019S                 | Adapta     | Km app | 10           | 14  | 12                |           |
| 240   | LRRK2 G2019S FL              | Adapta     | Km app | 6            | -3  | 2                 |           |
| 241   | LRRK2 I2020T                 | Adapta     | Km app | 1            | 1   | 1                 |           |
| 242   | LRRK2 R1441C                 | Adapta     | Km app | 1            | 2   | 2                 |           |
| 243   | LTK (TYK1)                   | ZLYTE      | Km app | -1           | 2   | 0                 |           |
| 244   | LYN A                        | ZLYTE      | Km app | 10           | 13  | 11                |           |
| 245   | LYN B                        | ZLYTE      | Km app | 3            | 2   | 2                 |           |
| 246   | MAP2K1 (MEK1)                | ZLYTE      | 100    | 1            | 5   | 3                 |           |
| 247   | MAP2K1 (MEK1)                | Lantha     | n/a    | -2           | -7  | -5                |           |
| 248   | MAP2K1 (MEK1) S218D S222D    | Lantha     | n/a    | 8            | 2   | 5                 |           |
| 249   | MAP2K2 (MEK2)                | ZLYTE      | 100    | 7            | 9   | 8                 |           |
| 250   | MAP2K2 (MEK2)                | Lantha     | n/a    | -3           | 2   | -1                |           |
| 251   | MAP2K4 (MEK4)                | Lantha     | n/a    | 9            | 18  | 13                |           |
| 252   | MAP2K5 (MEK5)                | Lantha     | n/a    | 5            | 4   | 5                 |           |
| 253   | MAP2K6 (MKK6)                | ZLYTE      | 100    | 3            | 6   | 5                 |           |
| 254   | MAP2K6 (MKK6)                | Lantha     | n/a    | 12           | 15  | 13                |           |
| 255   | MAP2K6 (MKK6) S207E T211E    | Lantha     | n/a    | 14           | 15  | 14                |           |
| 256   | MAP3K10 (MLK2)               | Lantha     | n/a    | 8            | 4   | 6                 |           |
| 257   | MAP3K11 (MLK3)               | Lantha     | n/a    | -2           | 3   | 0                 |           |
| 258   | MAP3K14 (NIK)                | Lantha     | n/a    | 8            | -2  | 3                 |           |
| 259   | MAP3K19 (YSK4)               | ZLYTE      | Km app | -7           | -3  | -5                |           |
| 260   | MAP3K2 (MEKK2)               | Lantha     | n/a    | 1            | 10  | 6                 |           |
| 261   | MAP3K3 (MEKK3)               | Lantha     | n/a    | -11          | -13 | -12               |           |
| 262   | MAP3K5 (ASK1)                | Lantha     | n/a    | 4            | 0   | 2                 |           |
| 263   | MAP3K7/MAP3K7IP1 (TAK1-TAB1) | Lantha     | n/a    | 11           | 7   | 9                 |           |
| 264   | MAP3K8 (COT)                 | ZLYTE      | 100    | 6            | 4   | 5                 |           |
| 265   | MAP3K9 (MLK1)                | ZLYTE      | Km app | 21           | 21  | 21                |           |
| 266   | MAP4K1 (HPK1)                | Lantha     | n/a    | 16           | 16  | 16                |           |
| 267   | MAP4K2 (GCK)                 | ZLYTE      | Km app | 3            | 18  | 10                |           |
| 268   | MAP4K3 (GLK)                 | Lantha     | n/a    | -1           | -2  | -1                |           |
| 269   | MAP4K4 (HGK)                 | ZLYTE      | Km app | 9            | 8   | 8                 |           |
| 270   | MAP4K5 (KHS1)                | ZLYTE      | Km app | 15           | 18  | 16                |           |
| 271   | MAPK1 (ERK2)                 | ZLYTE      | Km app | -6           | -18 | -12               |           |
| 272   | MAPK10 (JNK3)                | ZLYTE      | 100    | 1            | 0   | 1                 |           |
| 273   | MAPK10 (JNK3)                | Lantha     | n/a    | 3            | 7   | 5                 |           |
| 274   | MAPK11 (p38 beta)            | ZLYTE      | Km app | -4           | -5  | -5                |           |
| 275   | MAPK12 (p38 gamma)           | ZLYTE      | Km app | 8            | 14  | 11                |           |
| 276   | MAPK13 (p38 delta)           | ZLYTE      | Km app | 8            | 9   | 8                 |           |
| 277   | MAPK14 (p38 alpha)           | ZLYTE      | 100    | 13           | 11  | 12                |           |
| 278   | MAPK14 (p38 alpha) Direct    | ZLYTE      | Km app | -16          | -20 | -18               |           |
| 279   | MAPK15 (ERK7)                | Lantha     | n/a    | 7            | 2   | 4                 |           |
| 280   | MAPK3 (ERK1)                 | ZLYTE      | Km app | 0            | 0   | 0                 |           |
| 281   | MAPK7 (ERK5)                 | ZLYTE      | Km app | 10           | 11  | 10                |           |
| 282   | MAPK8 (JNK1)                 | ZLYTE      | 100    | -8           | -9  | -8                |           |
| 283   | MAPK8 (JNK1)                 | Lantha     | n/a    | 6            | 4   | 5                 |           |
| 284   | MAPK9 (JNK2)                 | ZLYTE      | 100    | 6            | 11  | 9                 |           |
| 285   | MAPK9 (JNK2)                 | Lantha     | n/a    | 11           | 13  | 12                |           |
| 286   | MAPKAPK2                     | ZLYTE      | Km app | 8            | -8  | 0                 |           |
| 287   | MAPKAPK3                     | ZLYTE      | Km app | 19           | 12  | 15                |           |
| 288   | MAPKAPK5 (PRAK)              | ZLYTE      | Km app | 1            | 7   | 4                 |           |
| 289   | MARK1 (MARK)                 | ZLYTE      | Km app | 3            | 6   | 5                 |           |
| 290   | MARK2                        | ZLYTE      | Km app | -6           | -5  | -5                |           |

| Entry | Kinase               | Technology | ATP    | % Inhibition |     | % Inhibition mean | IC50 / nM |
|-------|----------------------|------------|--------|--------------|-----|-------------------|-----------|
|       |                      |            |        | 1            | 2   |                   |           |
| 291   | MARK3                | ZLYTE      | Km app | 19           | 17  | 18                |           |
| 292   | MARK4                | ZLYTE      | Km app | 16           | 12  | 14                |           |
| 293   | MASTL                | Lantha     | n/a    | -22          | -1  | -11               |           |
| 294   | MATK (HYL)           | ZLYTE      | Km app | 1            | -6  | -3                |           |
| 295   | MELK                 | ZLYTE      | Km app | 22           | 24  | 23                |           |
| 296   | MERTK (cMER)         | ZLYTE      | Km app | 1            | 1   | 1                 |           |
| 297   | MERTK (cMER) A708S   | Lantha     | n/a    | -3           | -5  | -4                |           |
| 298   | MET (cMet)           | ZLYTE      | Km app | 6            | 7   | 6                 |           |
| 299   | MET (cMet) Y1235D    | ZLYTE      | Km app | -5           | 3   | -1                |           |
| 300   | MET D1228H           | Lantha     | n/a    | -10          | -1  | -6                |           |
| 301   | MET M1250T           | ZLYTE      | Km app | -3           | 0   | -2                |           |
| 302   | MINK1                | ZLYTE      | Km app | -6           | -1  | -4                |           |
| 303   | MKNK1 (MNK1)         | ZLYTE      | Km app | 4            | -4  | 0                 |           |
| 304   | MKNK2 (MNK2)         | Lantha     | n/a    | -13          | 11  | -1                |           |
| 305   | MLCK (MLCK2)         | Lantha     | n/a    | 8            | 14  | 11                |           |
| 306   | MLK4                 | Lantha     | n/a    | -38          | -16 | -27               |           |
| 307   | MST1R (RON)          | ZLYTE      | Km app | 4            | -2  | 1                 |           |
| 308   | MST4                 | ZLYTE      | Km app | 5            | -10 | -2                |           |
| 309   | MUSK                 | ZLYTE      | Km app | 1            | -2  | -1                |           |
| 310   | MYLK (MLCK)          | Lantha     | n/a    | -1           | 2   | 0                 |           |
| 311   | MYLK2 (skMLCK)       | ZLYTE      | Km app | 3            | 1   | 2                 |           |
| 312   | MYLK4                | Lantha     | n/a    | 9            | 3   | 6                 |           |
| 313   | MYO3A (MYO3 alpha)   | Lantha     | n/a    | -6           | -6  | -6                |           |
| 314   | MYO3B (MYO3 beta)    | Lantha     | n/a    | 0            | -4  | -2                |           |
| 315   | NEK1                 | ZLYTE      | Km app | 4            | -6  | -1                |           |
| 316   | NEK2                 | ZLYTE      | Km app | -6           | 2   | -2                |           |
| 317   | NEK4                 | ZLYTE      | Km app | 3            | 5   | 4                 |           |
| 318   | NEK6                 | ZLYTE      | Km app | 16           | 6   | 11                |           |
| 319   | NEK8                 | Lantha     | n/a    | -18          | -17 | -18               |           |
| 320   | NEK9                 | ZLYTE      | Km app | -2           | 0   | -1                |           |
| 321   | NIM1K                | ZLYTE      | Km app | 2            | 2   | 2                 |           |
| 322   | NLK                  | Lantha     | n/a    | 8            | 12  | 10                |           |
| 323   | NTRK1 (TRKA)         | ZLYTE      | Km app | -33          | -10 | -21               |           |
| 324   | NTRK2 (TRKB)         | ZLYTE      | Km app | -1           | -3  | -2                |           |
| 325   | NTRK3 (TRKC)         | ZLYTE      | Km app | 2            | -6  | -2                |           |
| 326   | NUAK1 (ARK5)         | Adapta     | Km app | 10           | 5   | 8                 |           |
| 327   | NUAK2                | Lantha     | n/a    | 10           | 17  | 14                |           |
| 328   | PAK1                 | ZLYTE      | Km app | -1           | 3   | 1                 |           |
| 329   | PAK2 (PAK65)         | ZLYTE      | Km app | 2            | 6   | 4                 |           |
| 330   | PAK3                 | ZLYTE      | Km app | 17           | 12  | 14                |           |
| 331   | PAK4                 | ZLYTE      | Km app | -8           | -9  | -8                |           |
| 332   | PAK6                 | ZLYTE      | Km app | -13          | 3   | -5                |           |
| 333   | PAK7 (KIAA1264)      | ZLYTE      | Km app | -14          | 7   | -4                |           |
| 334   | PASK                 | ZLYTE      | Km app | 8            | 17  | 12                |           |
| 335   | PDGFRA (PDGFR alpha) | ZLYTE      | Km app | -2           | 4   | 1                 |           |
| 336   | PDGFRA D842V         | ZLYTE      | Km app | -1           | -8  | -4                |           |
| 337   | PDGFRA T674I         | ZLYTE      | Km app | -26          | -38 | -32               |           |
| 338   | PDGFRA V561D         | ZLYTE      | Km app | 0            | 0   | 0                 |           |
| 339   | PDGFRB (PDGFR beta)  | ZLYTE      | Km app | -12          | -3  | -8                |           |
| 340   | PDK1                 | ZLYTE      | 100    | -1           | 3   | 1                 |           |
| 341   | PDK1 Direct          | ZLYTE      | Km app | -4           | 6   | 1                 |           |
| 342   | PEAK1                | ZLYTE      | Km app | -4           | -3  | -3                |           |



| Entry | Kinase                                           | Technology | ATP    | % Inhibition |     | % Inhibition mean | IC50 / nM |
|-------|--------------------------------------------------|------------|--------|--------------|-----|-------------------|-----------|
|       |                                                  |            |        | 1            | 2   |                   |           |
| 343   | PHKG1                                            | ZLYTE      | Km app | 12           | 7   | 10                |           |
| 344   | PHKG2                                            | ZLYTE      | Km app | 4            | 8   | 6                 |           |
| 345   | PI4K2A (PI4K2 alpha)                             | Adapta     | Km app | -3           | -3  | -3                |           |
| 346   | PI4K2B (PI4K2 beta)                              | Adapta     | Km app | -8           | -3  | -6                |           |
| 347   | PI4KA (PI4K alpha)                               | Adapta     | 10     | 11           | 14  | 12                |           |
| 348   | PI4KB (PI4K beta)                                | Adapta     | Km app | 78           | 78  | 78                | 5160      |
| 349   | PIK3C2A (PI3K-C2 alpha)                          | Adapta     | Km app | 11           | 16  | 13                |           |
| 350   | PIK3C2B (PI3K-C2 beta)                           | Adapta     | 10     | 77           | 76  | 76                | 2160      |
| 351   | PIK3C2G (PI3K-C2 gamma)                          | Adapta     | Km app | 86           | 86  | 86                | 497       |
| 352   | PIK3C3 (hVPS34)                                  | Adapta     | Km app | 97           | 97  | 97                | 350       |
| 353   | PIK3CA E542K/PIK3R1 (p110 alpha E542K/p85 alpha) | Adapta     | 10     | 26           | 24  | 25                |           |
| 354   | PIK3CA E545K/PIK3R1 (p110 alpha E545K/p85 alpha) | Adapta     | Km app | 0            | 2   | 1                 |           |
| 355   | PIK3CA/PIK3R1 (p110 alpha/p85 alpha)             | Adapta     | Km app | 12           | 14  | 13                |           |
| 356   | PIK3CA/PIK3R3 (p110 alpha/p55 gamma)             | Adapta     | Km app | 10           | 12  | 11                |           |
| 357   | PIK3CB/PIK3R1 (p110 beta/p85 alpha)              | Adapta     | Km app | 0            | -3  | -1                |           |
| 358   | PIK3CB/PIK3R2 (p110 beta/p85 beta)               | Adapta     | Km app | -11          | -8  | -9                |           |
| 359   | PIK3CD/PIK3R1 (p110 delta/p85 alpha)             | Adapta     | Km app | 78           | 79  | 79                | 4790      |
| 360   | PIK3CG (p110 gamma)                              | Adapta     | Km app | -4           | -10 | -7                |           |
| 361   | PIM1                                             | ZLYTE      | Km app | 1            | 3   | 2                 |           |
| 362   | PIM2                                             | ZLYTE      | Km app | 5            | 4   | 5                 |           |
| 363   | PIM3                                             | ZLYTE      | Km app | 5            | -5  | 0                 |           |
| 364   | PIP4K2A                                          | Adapta     | 10     | 7            | -2  | 2                 |           |
| 365   | PIP5K1A                                          | Adapta     | 10     | 3            | -4  | 0                 |           |
| 366   | PIP5K1B                                          | Adapta     | 10     | 4            | 0   | 2                 |           |
| 367   | PIP5K1C                                          | Adapta     | 10     | -23          | -21 | -22               |           |
| 368   | PKMYT1                                           | Lantha     | n/a    | 6            | 10  | 8                 |           |
| 369   | PKN1 (PRK1)                                      | ZLYTE      | Km app | 5            | 0   | 2                 |           |
| 370   | PKN2 (PRK2)                                      | Lantha     | n/a    | -6           | -4  | -5                |           |
| 371   | PLK1                                             | ZLYTE      | Km app | 7            | 6   | 7                 |           |
| 372   | PLK2                                             | ZLYTE      | Km app | 8            | 5   | 6                 |           |
| 373   | PLK3                                             | ZLYTE      | Km app | 19           | 5   | 12                |           |
| 374   | PLK4                                             | Lantha     | n/a    | 14           | 11  | 13                |           |
| 375   | PRKACA (PKA)                                     | ZLYTE      | Km app | 6            | 8   | 7                 |           |
| 376   | PRKACB (PRKAC beta)                              | Lantha     | n/a    | 11           | 5   | 8                 |           |
| 377   | PRKACG (PRKAC gamma)                             | Lantha     | n/a    | 16           | 12  | 14                |           |
| 378   | PRKCA (PKC alpha)                                | ZLYTE      | Km app | 11           | 10  | 11                |           |
| 379   | PRKCB1 (PKC beta I)                              | ZLYTE      | Km app | 0            | 1   | 1                 |           |
| 380   | PRKCB2 (PKC beta II)                             | ZLYTE      | Km app | 3            | 13  | 8                 |           |
| 381   | PRKCD (PKC delta)                                | ZLYTE      | Km app | -9           | -3  | -6                |           |
| 382   | PRKCE (PKC epsilon)                              | ZLYTE      | Km app | -6           | 10  | 2                 |           |
| 383   | PRKCG (PKC gamma)                                | ZLYTE      | Km app | 6            | 23  | 15                |           |
| 384   | PRKCH (PKC eta)                                  | ZLYTE      | Km app | 1            | 14  | 7                 |           |
| 385   | PRKCI (PKC iota)                                 | ZLYTE      | Km app | 5            | 0   | 2                 |           |
| 386   | PRKCN (PKD3)                                     | ZLYTE      | Km app | 3            | 10  | 7                 |           |
| 387   | PRKCQ (PKC theta)                                | ZLYTE      | Km app | 4            | -6  | -1                |           |

| Entry | Kinase                  | Technology | ATP    | % Inhibition |     | % Inhibition mean | IC50 / nM |
|-------|-------------------------|------------|--------|--------------|-----|-------------------|-----------|
|       |                         |            |        | 1            | 2   |                   |           |
| 388   | PRKCZ (PKC zeta)        | ZLYTE      | Km app | 3            | 3   | 3                 |           |
| 389   | PRKD1 (PKC mu)          | ZLYTE      | Km app | 4            | 1   | 2                 |           |
| 390   | PRKD2 (PKD2)            | ZLYTE      | Km app | 2            | 1   | 2                 |           |
| 391   | PRKG1                   | ZLYTE      | Km app | 7            | 11  | 9                 |           |
| 392   | PRKG2 (PKG2)            | ZLYTE      | Km app | 12           | 14  | 13                |           |
| 393   | PRKX                    | ZLYTE      | Km app | 5            | 14  | 10                |           |
| 394   | PTK2 (FAK)              | ZLYTE      | Km app | -2           | -2  | -2                |           |
| 395   | PTK2B (FAK2)            | ZLYTE      | Km app | -1           | 1   | 0                 |           |
| 396   | PTK6 (Brk)              | ZLYTE      | Km app | -2           | -2  | -2                |           |
| 397   | RAF1 (cRAF) Y340D Y341D | ZLYTE      | 100    | 19           | 20  | 20                |           |
| 398   | RAF1 (cRAF) Y340D Y341D | Lantha     | n/a    | -3           | -2  | -3                |           |
| 399   | RET                     | ZLYTE      | Km app | -2           | -1  | -2                |           |
| 400   | RET A883F               | ZLYTE      | Km app | -6           | -4  | -5                |           |
| 401   | RET G691S               | Lantha     | n/a    | -17          | -24 | -20               |           |
| 402   | RET M918T               | Lantha     | n/a    | -6           | -25 | -15               |           |
| 403   | RET S891A               | ZLYTE      | Km app | -4           | -6  | -5                |           |
| 404   | RET V804E               | ZLYTE      | Km app | 0            | -5  | -3                |           |
| 405   | RET V804L               | ZLYTE      | Km app | 1            | -1  | 0                 |           |
| 406   | RET V804M               | Lantha     | n/a    | -15          | -18 | -16               |           |
| 407   | RET Y791F               | ZLYTE      | Km app | 6            | 7   | 7                 |           |
| 408   | RIPK2                   | Lantha     | n/a    | 7            | 9   | 8                 |           |
| 409   | RIPK3                   | Lantha     | n/a    | -48          | -48 | -48               |           |
| 410   | ROCK1                   | ZLYTE      | Km app | 1            | -4  | -1                |           |
| 411   | ROCK2                   | ZLYTE      | Km app | 10           | 8   | 9                 |           |
| 412   | ROS1                    | ZLYTE      | Km app | 5            | 0   | 2                 |           |
| 413   | RPS6KA1 (RSK1)          | ZLYTE      | Km app | 14           | 6   | 10                |           |
| 414   | RPS6KA2 (RSK3)          | ZLYTE      | Km app | -8           | 9   | 0                 |           |
| 415   | RPS6KA3 (RSK2)          | ZLYTE      | Km app | 13           | 12  | 13                |           |
| 416   | RPS6KA4 (MSK2)          | ZLYTE      | Km app | 4            | 6   | 5                 |           |
| 417   | RPS6KA5 (MSK1)          | ZLYTE      | Km app | 3            | 15  | 9                 |           |
| 418   | RPS6KA6 (RSK4)          | ZLYTE      | Km app | 5            | 16  | 11                |           |
| 419   | RPS6KB1 (p70S6K)        | ZLYTE      | Km app | -1           | -1  | -1                |           |
| 420   | RPS6KB2 (p70S6Kb)       | ZLYTE      | Km app | -2           | 0   | -1                |           |
| 421   | SBK1                    | ZLYTE      | Km app | 3            | 4   | 4                 |           |
| 422   | SGK (SGK1)              | ZLYTE      | Km app | 10           | 22  | 16                |           |
| 423   | SGK2                    | ZLYTE      | Km app | 14           | 10  | 12                |           |
| 424   | SGKL (SGK3)             | ZLYTE      | Km app | 0            | 6   | 3                 |           |
| 425   | SIK1                    | Lantha     | n/a    | -4           | 1   | -2                |           |
| 426   | SIK3                    | Lantha     | n/a    | 7            | -4  | 2                 |           |
| 427   | SLK                     | Lantha     | n/a    | -9           | -7  | -8                |           |
| 428   | SNF1LK2                 | ZLYTE      | Km app | 4            | 1   | 2                 |           |
| 429   | SPHK1                   | Adapta     | Km app | 22           | 27  | 24                |           |
| 430   | SPHK2                   | Adapta     | 10     | 75           | 74  | 75                | 2770      |
| 431   | SRC                     | ZLYTE      | Km app | -8           | -2  | -5                |           |
| 432   | SRC N1                  | ZLYTE      | Km app | 6            | 8   | 7                 |           |
| 433   | SRMS (Srm)              | ZLYTE      | Km app | 10           | 17  | 13                |           |
| 434   | SRPK1                   | ZLYTE      | Km app | 12           | 8   | 10                |           |
| 435   | SRPK2                   | ZLYTE      | Km app | -7           | 4   | -2                |           |
| 436   | STK16 (PKL12)           | Lantha     | n/a    | -21          | -11 | -16               |           |
| 437   | STK17A (DRAK1)          | Lantha     | n/a    | 9            | 0   | 4                 |           |
| 438   | STK17B (DRAK2)          | Lantha     | n/a    | 7            | -11 | -2                |           |
| 439   | STK22B (TSSK2)          | ZLYTE      | Km app | 9            | 14  | 11                |           |

| Entry | Kinase            | Technology | ATP    | % Inhibition |     | % Inhibition mean | IC50 / nM |
|-------|-------------------|------------|--------|--------------|-----|-------------------|-----------|
|       |                   |            |        | 1            | 2   |                   |           |
| 440   | STK22D (TSSK1)    | ZLYTE      | Km app | 4            | 1   | 2                 |           |
| 441   | STK23 (MSSK1)     | ZLYTE      | Km app | 2            | 4   | 3                 |           |
| 442   | STK24 (MST3)      | ZLYTE      | Km app | 12           | 8   | 10                |           |
| 443   | STK25 (YSK1)      | ZLYTE      | Km app | 2            | 27  | 15                |           |
| 444   | STK3 (MST2)       | ZLYTE      | Km app | -3           | -7  | -5                |           |
| 445   | STK32B (YANK2)    | Lantha     | n/a    | 11           | 11  | 11                |           |
| 446   | STK32C (YANK3)    | Lantha     | n/a    | -6           | 13  | 4                 |           |
| 447   | STK33             | Lantha     | n/a    | 8            | 9   | 8                 |           |
| 448   | STK38 (NDR)       | Lantha     | n/a    | 2            | 17  | 9                 |           |
| 449   | STK38L (NDR2)     | Lantha     | n/a    | -6           | -8  | -7                |           |
| 450   | STK39 (STLK3)     | Lantha     | n/a    | 8            | -16 | -4                |           |
| 451   | STK4 (MST1)       | ZLYTE      | Km app | -1           | -3  | -2                |           |
| 452   | SYK               | ZLYTE      | Km app | 6            | 9   | 7                 |           |
| 453   | TAOK1             | Lantha     | n/a    | -1           | -2  | -1                |           |
| 454   | TAOK2 (TAO1)      | ZLYTE      | Km app | -6           | 1   | -2                |           |
| 455   | TAOK3 (JIK)       | Lantha     | n/a    | -5           | 6   | 1                 |           |
| 456   | TBK1              | ZLYTE      | Km app | 4            | 5   | 5                 |           |
| 457   | TEC               | Lantha     | n/a    | -9           | -4  | -7                |           |
| 458   | TEK (Tie2)        | ZLYTE      | Km app | 8            | 10  | 9                 |           |
| 459   | TEK (TIE2) R849W  | Lantha     | n/a    | -14          | -20 | -17               |           |
| 460   | TEK (TIE2) Y1108F | Lantha     | n/a    | -14          | -10 | -12               |           |
| 461   | TEK (TIE2) Y897S  | ZLYTE      | Km app | 7            | 3   | 5                 |           |
| 462   | TESK1             | Lantha     | n/a    | 0            | 14  | 7                 |           |
| 463   | TESK2             | Lantha     | n/a    | -25          | -7  | -16               |           |
| 464   | TGFBR1 (ALK5)     | Lantha     | n/a    | 4            | 5   | 5                 |           |
| 465   | TGFBR2            | Lantha     | n/a    | -13          | -15 | -14               |           |
| 466   | TLK1              | Lantha     | n/a    | -3           | -6  | -5                |           |
| 467   | TLK2              | Lantha     | n/a    | -3           | -27 | -15               |           |
| 468   | TNIK              | Lantha     | n/a    | 7            | 9   | 8                 |           |
| 469   | TNK1              | ZLYTE      | Km app | -9           | 9   | 0                 |           |
| 470   | TNK2 (ACK)        | Lantha     | n/a    | 11           | 4   | 7                 |           |
| 471   | TTK               | Lantha     | n/a    | 17           | 13  | 15                |           |
| 472   | TXK               | ZLYTE      | Km app | 1            | 10  | 5                 |           |
| 473   | TYK2              | ZLYTE      | Km app | 0            | 3   | 1                 |           |
| 474   | TYRO3 (RSE)       | ZLYTE      | Km app | 1            | 0   | 1                 |           |
| 475   | ULK1              | Lantha     | n/a    | -2           | -11 | -7                |           |
| 476   | ULK2              | Lantha     | n/a    | 7            | 10  | 9                 |           |
| 477   | ULK3              | Lantha     | n/a    | -14          | -4  | -9                |           |
| 478   | VRK2              | Lantha     | n/a    | 4            | 0   | 2                 |           |
| 479   | WEE1              | Lantha     | n/a    | -3           | 14  | 5                 |           |
| 480   | WNK1              | Lantha     | n/a    | -32          | -24 | -28               |           |
| 481   | WNK2              | Lantha     | n/a    | 29           | 9   | 19                |           |
| 482   | WNK3              | Lantha     | n/a    | -2           | -12 | -7                |           |
| 483   | YES1              | ZLYTE      | Km app | 5            | 5   | 5                 |           |
| 484   | ZAK               | Lantha     | n/a    | 0            | 2   | 1                 |           |
| 485   | ZAP70             | ZLYTE      | Km app | -3           | -7  | -5                |           |

## 5.6 Immunoblotting

Cells were lysed in ice cold lysis buffer (20 mM Tris-HCl pH 8, 300 mM KCl, 10% Glycerol, 0.25% Nonidet P-40, 0.5 mM EDTA, 0.5 mM EGTA, 1 mM PMSF, 1x complete protease inhibitor) and passed 5X through a 21G needle. After clearance by centrifugation protein concentrations were determined via Bradford assay (Bio-Rad Protein Reagent, cat# 5000006) and lysates normalized. Lysates were mixed with 4X sample buffer, boiled for 10 min, proteins separated by SDS-PAGE, then transferred to nitrocellulose membrane (Bio-Rad, cat# 1704159 ) using a Trans-Blot Turbo transfer system (Bio-Rad). Membranes were blocked with 5% skim milk (in TBST) and incubated with primary antibody overnight at 4°C. Membranes were washed with TBST and incubated with an HRP-conjugated secondary antibody diluted in 5% skim milk for 1 h at room temperature. After washing, protein detection was carried out using chemiluminescence and imaged using a ChemiDoc imaging system (Bio-Rad).

## 5.7 Live-cell microscopy

For live-cell imaging of Hek293A EGFP-WIP12b cells, cells were seeded on poly-L-lysine coated 8-well cover glass bottom chamber slides (Sarstedt, cat# 94.6190.802) and incubated for 24 h. Imaging was performed on a Zeiss Cell Observer spinning disk confocal (ANDOR iXon Ultra ) (Carl Zeiss) equipped with a 63x immersion oil objective lens (Plan-Apochromat 1.40 Oil DIC M27) and a temperature-controlled hood maintained at 37°C and 5% CO<sub>2</sub>. Quantification of puncta was performed using the spot tracking function of the open-source bioimage processing software, Icy.<sup>[23]</sup>

## 5.8 Cellular thermal shift assay (CETSA) in cell lysate

### Procedure:

Two T75 cell culture Flasks were seeded with each  $6 \times 10^5$  MCF7#2011 cells in 12 mL DMEM and incubated at 37°C and 5% CO<sub>2</sub> for three days. Cells were detached, transferred to two separate tubes and washed three times with PBS. Then 0.6 mL PBS containing 0.04% NP-40 Alternative were added to each tube and cells were lysed by means of freeze and thaw. Either 50 µM of Azaquindole-1 or DMSO were added to the lysates, samples were mixed and incubated for 10 min. Treated and non-treated lysates were divided into ten aliquots, each 50 µL in PCR tubes. The aliquots were individually heated at different temperatures (*Eppendorf Mastercycler ep Gradient S*). After the heat treatment the cell lysates were completely transferred to polycarbonate tubes and centrifuged (*Beckman Optima MAX-TL*) at 100,000 g, 4°C for 25 min. 16 µL of each supernatant was added with 4 µL of 5x loading buffer and incubated for 5 min at 95°C, before samples were analyzed by Immunoblotting. Proteins were separated by SDS-PAGE, and transferred to PDVF membrane using wet transfer. The membranes were blocked with Odyssey Blocking Buffer (TBS; *Li-Cor*) for 1 h and incubated with the primary antibody (PI3 Kinase Class III (D4E2) Rabbit mAb #3358 Cell Signalling in Odyssey blocking buffer containing 0.2% Tween-20) at 4°C over night. After washing with TBS-T (TBS containing 0.1 % Tween) the membrane was incubated with the secondary antibody coupled to IRDye® 800CW (Donkey anti-Rabbit IgG, *Li-COR*) for 1 h, in Odyssey blocking buffer containing 0.2% Tween-20 and 0.1 % SDS at room temperature. Membranes were washed with TBS-T, then TBS before images were taken (*Bio-Rad ChemiDoc™ MP Imaging System*).

**Analysis:** Images were analyzed with ImageJ (FUJI). Normalisation and all calculations were done with PRISM. (Curves: IC<sub>50</sub> variable slope → turning points correspond to melting temperature in obtained curves).

## 5.9 VPS34 kinetic experiments

### 5.9.1 Experimental protocol

Determination of the kinetic parameters of **10w-j** against VPS34 was carried out by SignalChem (Kanada). VPS34 was cloned, expressed and purified at SignalChem using proprietary methods. Quality control testing is routinely performed on each of the SignalChem targets to ensure compliance to acceptable standards. The protein kinase assays were performed using the ADP-Glo™ assay kit purchased from Promega. The assay conditions for the kinases were optimized to yield acceptable enzymatic activity. In addition, the assays were optimized to give high signal-to-noise ratio. The optimized conditions are as follows:

The protein kinase assays were performed in duplicate at room temperature for 40 min in a final volume of 5  $\mu$ L in 384-well plates according to the following assay reaction recipe:

**Component 1.** 1  $\mu$ L of diluted active protein kinase

**Component 2.** 1  $\mu$ L of peptide substrate

**Component 3.** 1  $\mu$ L kinase assay buffer

**Component 4.** 1  $\mu$ L compound (various concentrations) or 10% DMSO

**Component 5.** 1  $\mu$ L of ATP stock solution (final  $\mu$ M as below)

The following final ATP concentrations were attained in the experiment: 12.5, 25, 50, 100, 200, 400  $\mu$ M. The assay was started by incubating the reaction mixture in a 384-well plate at room temperature for 40 minutes. After the incubation period, the assay was terminated by the addition of 5  $\mu$ l of ADP-Glo™ Reagent (Promega). The plate was shaken and then incubated for 40 minutes at ambient temperature. Then 10  $\mu$ L of Kinase Detection Reagent was added, the plate shaken and then incubated for further 30 min at ambient temperature. Readout of the Luminescence signal was performed using the ADP-Glo™ Luminescence Protocol on a GloMax plate reader. A Blank control was set up that included all the assay components except the addition of the enzyme (replace with equal volume of kinase assay buffer). The corrected activity for protein kinase targets were determined by removing the blank control value. A nonlinear regression (curve fit) – mixed model inhibition analysis was run on GraphPad Prism using the obtained corrected data. Given Curves were generated from results of three independent runs ( $n = 3$ ).

### 5.9.2 Michaelis–Menten Saturation Curves

Plotted below are the mean data  $\pm$  SD ( $n = 3$ ):

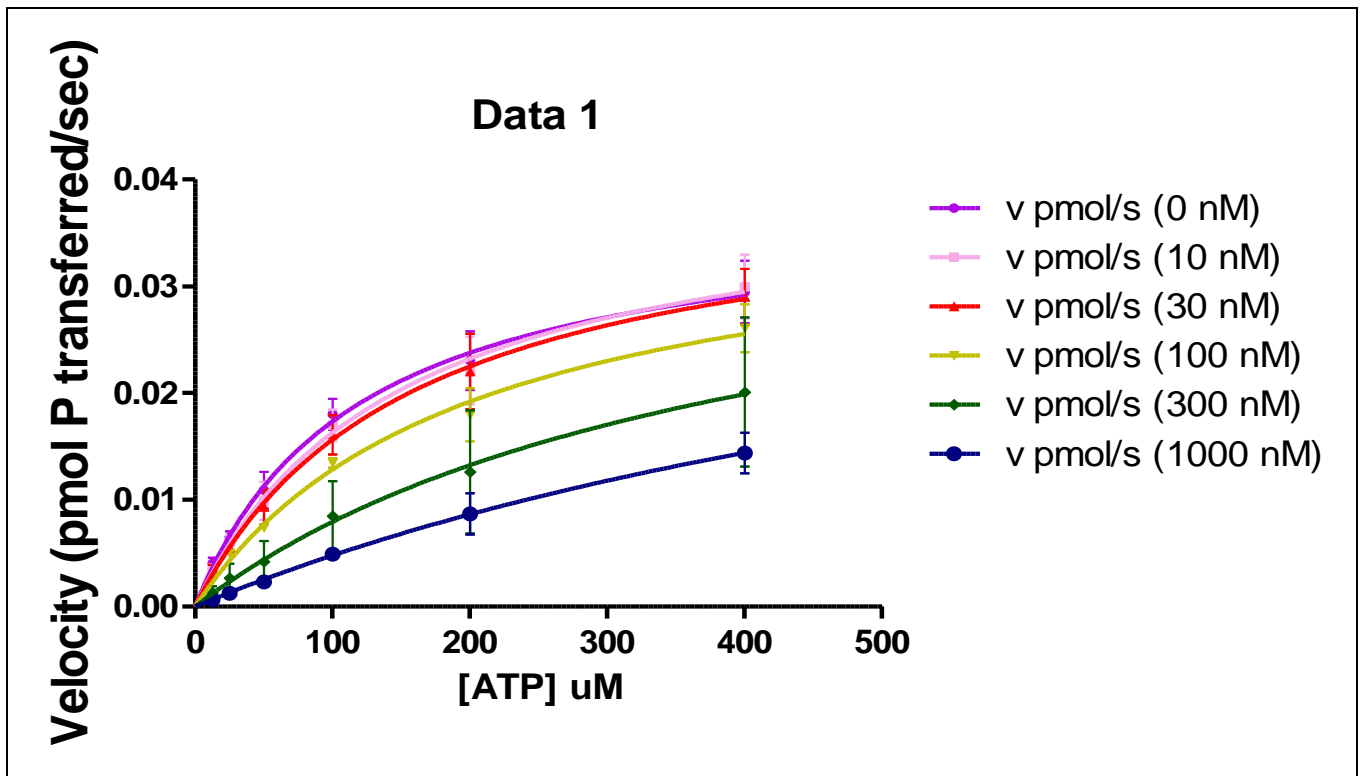

### 5.9.3 %inhibition versus $[10w-f]$ plot

Plotted below are the mean data  $\pm$  SD ( $n = 3$ ):

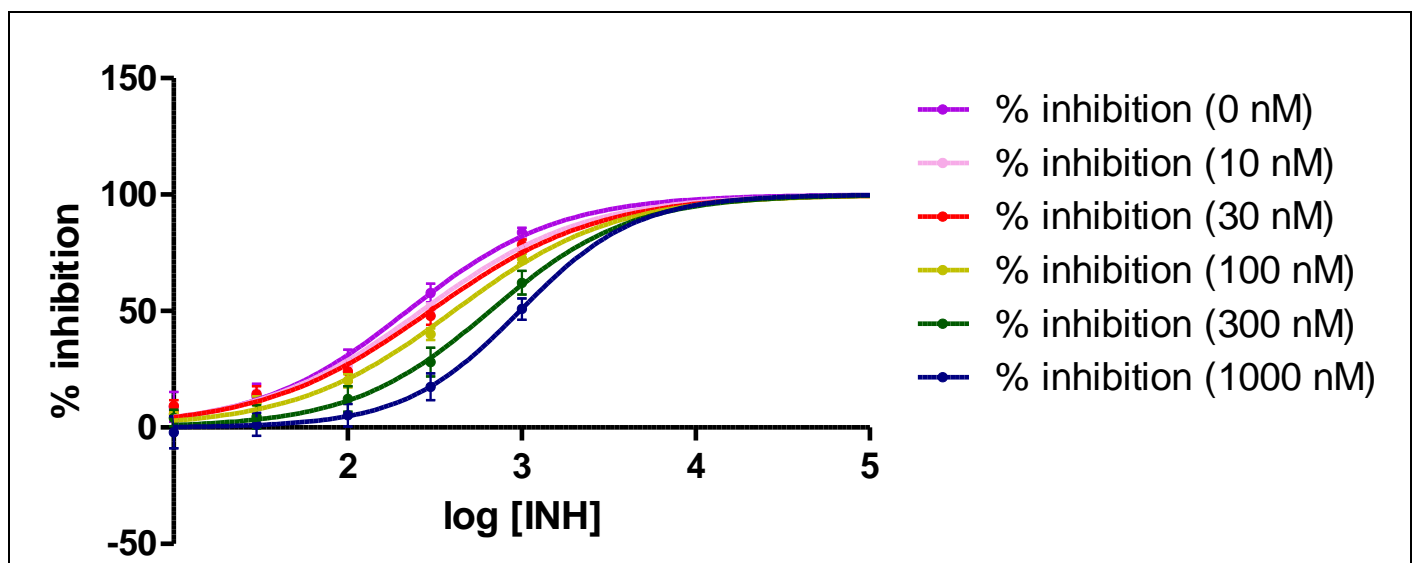

### 5.9.4 Lineweaver–Burk Plot

Plotted below are the mean data  $\pm$  SD ( $n = 3$ ):

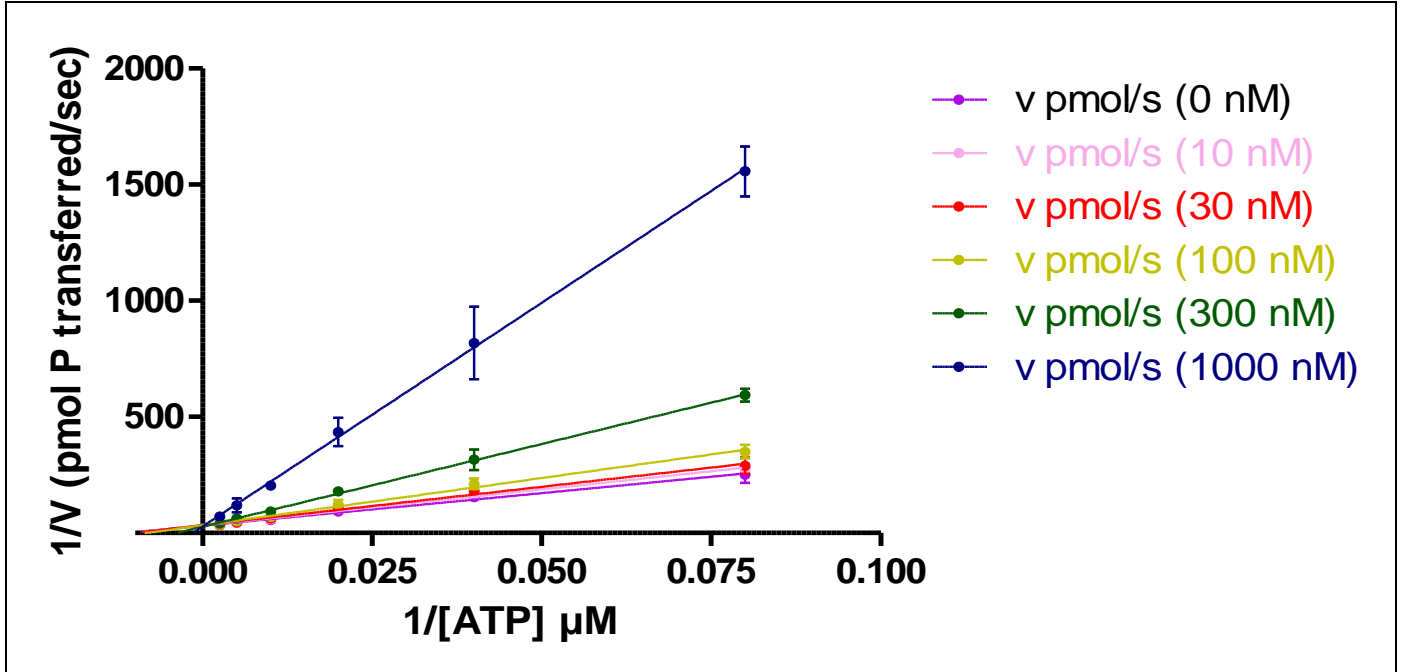

|           | $v$ pmol/s (0 nM) | $v$ pmol/s (10 nM) | $v$ pmol/s (30 nM) | $v$ pmol/s (100 nM) | $v$ pmol/s (300 nM) | $v$ pmol/s (1000 nM) |
|-----------|-------------------|--------------------|--------------------|---------------------|---------------------|----------------------|
| $V_{max}$ | 0.037786667       | 0.041013333        | 0.04029            | 0.040976667         | 0.04354667          | 0.043653333          |
| SD        | 0.003809544       | 0.005810074        | 0.004234745        | 0.004145362         | 0.00339038          | 0.003843491          |
| $K_m$     | 117.7666667       | 153.6              | 158.6333333        | 193.6666667         | 322.5               | 815.3333333          |
| SD        | 9.90633916        | 38.91760527        | 24.38309979        | 17.88748787         | 42.1369988          | 44.04409407          |



## 6.0 Synthetic experimental

### 6.1 General experimental

All non-aqueous reactions were performed under an atmosphere of N<sub>2</sub> unless otherwise stated. Dry solvents were received from Sigma-Aldrich or Acros in anhydrous quality and used without further purification. All other reaction solvents were HPLC grade. Milli-Q grade water was used in all experiments. Commercially available starting materials were obtained from Acros, Alfa Aesar, Enamine, Fluorochem, Key Organics, Sigma-Aldrich and TCI, and were used without purification.

Thin layer chromatography (TLC) was performed on Merck silica gel aluminium plate with F-254 indicator. Visualisation of the plates was achieved using an ultraviolet lamp ( $\lambda_{\text{max}} = 254 \text{ nm}$ ) and/or KMnO<sub>4</sub> staining (1.5 g in 400 mL H<sub>2</sub>O, 5 g NaHCO<sub>3</sub>). Flash chromatography was carried out using silica gel (particle size 40-60  $\mu\text{m}$ , 230-400 mesh) from Acros Organics. Chromatography solvents were technical grade.

Mass-directed preparative HPLC purifications were carried out using an Agilent 1100/LC/MSD VL system equipped with a C18 column (flow 20.0 mL/min, solvent A: 0.1% TFA in H<sub>2</sub>O, solvent B: 0.1% TFA in MeCN).

Chemical yields refer to pure isolated substances. Optical rotations were measured on a Schmitz + Hansch Polartronic HH8.  $[\alpha]_{\text{D}}^{20}$  values are given in [ $^{\circ} \text{ mL g}^{-1} \text{ dm}^{-1}$ ].

High resolution mass spectra (HRMS) were recorded on a LTQ Orbitrap mass spectrometer coupled to an Accela HPLC-System (HPLC column: Hypersyl GOLD, 50 mm x 1 mm, particle size 1.9  $\mu\text{m}$ , ionisation method: electron spray ionisation).

Proton (<sup>1</sup>H) and carbon (<sup>13</sup>C) NMR spectral data were collected on *Bruker AVANCE NEO* (500 MHz), *Bruker AVANCE HD-III* (600 MHz) and *Bruker AVANCE HDX-III* (700 MHz) spectrometers. Chemical shifts ( $\delta$ ) are quoted in parts per million (ppm) and referenced to the residual solvent peak. Coupling constants ( $J$ ) are quoted in Hertz (Hz) and splitting patterns reported in an abbreviated manner: app. (apparent), br. (broad), s (singlet), d (doublet), t (triplet), q (quartet), m (multiplet). All fully characterised products were assigned with the aid of COSY and HSQC experiments. Compounds are numbered with respect to their IUPAC names.

## 6.2 General procedures

### General procedure A: Preparation of the ketones

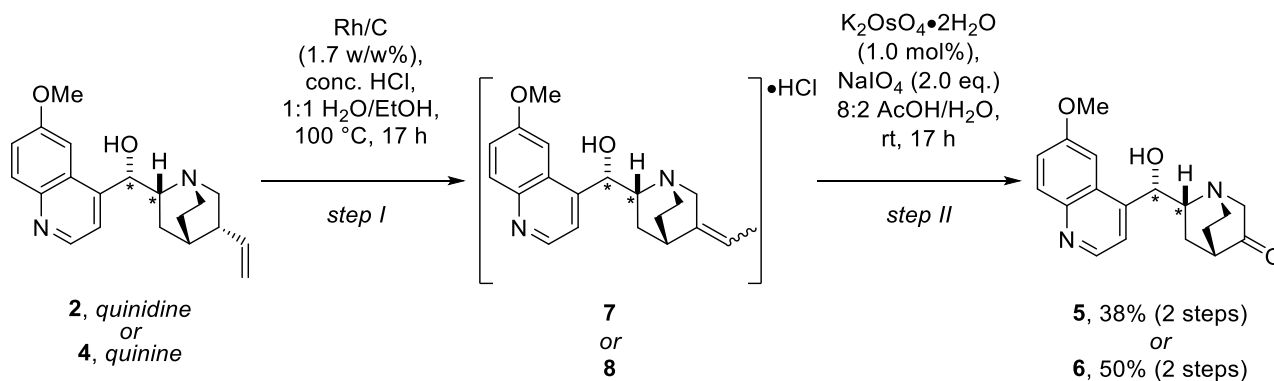

#### Step I: Isomerisation of the Cinchona alkaloid double bond:

Following a modification of a procedure by Portlock *et al.*,<sup>[24]</sup> in two batches, quinidine or quinine (2 × 6.0 g, 2 × 18.4 mmol [18.4 mmol in each batch, 36.8 mmol over 2 batches], 1.0 eq) was dissolved in 1:1 H<sub>2</sub>O/EtOH (2 × 120 mL, [120 mL in each batch, 240 mL overall]) and concentrated HCl (2 × 15.6 mL, 181 mmol [181 mmol in each batch, 362 mmol over 2 batches], 10 eq.) was added. Rh/C (5 wt%, 2 × 100 mg [100 mg in each batch, 200 mg overall], 1.7 w/w%) was added and the reaction mixtures were heated at reflux (101.5°C) under Ar for 17 h. The reaction mixtures were cooled to rt and the two batches were combined and filtered through celite, flushing through with MeOH.\* The filtrate was concentrated *in vacuo*.<sup>†</sup> To the resulting oil was added H<sub>2</sub>O (100 mL). Lyophilisation (72 h) gave the internal alkenes **7** or **8** as the hydrochloride salts, which were carried forward to the next step without further purification.

#### Step II: Oxidative cleavage of the alkene to the ketone:

Following a modification of a procedure by Carroll *et al.*,<sup>[25]</sup> the relevant hydrochloride salt **7** or **8** (5.0 mmol) was dissolved in 8:2 AcOH/H<sub>2</sub>O (24 mL) and K<sub>2</sub>OsO<sub>4</sub>•2H<sub>2</sub>O (18 mg, 0.05 mmol, 1.0 mol%) was added. The reaction mixture was stirred at rt for 10 min, then cooled to 0 °C. NaIO<sub>4</sub> (2.14 g, 10.0 mmol, 2.0 eq.) was added. The mixture was warmed to rt and stirred for 17 h. The mixture obtained was quenched with aqueous NaOH (10 M, ~50 mL) at 0°C until it was basic (tested with pH indicator paper). Sat. aq. Na<sub>2</sub>SO<sub>3</sub> solution (10 mL) was added to destroy OsO<sub>4</sub>. The resulting solution was extracted with 9:1 CHCl<sub>3</sub>/MeOH (4 × 50 mL) and 8:2 CHCl<sub>3</sub>/MeOH (2 × 50 mL).

\* Analysis of the crude reaction products by <sup>1</sup>H NMR spectroscopy showed complete conversion to a 2:1 mixture of *Z/E* alkenes.

<sup>†</sup> The HCl was scrubbed using 2.0 M NaOH (200 mL).

The combined organic fractions were dried over Na<sub>2</sub>SO<sub>4</sub>, filtered, and concentrated *in vacuo*. Flash column chromatography gave the ketones **5** or **6**.

### General Procedure B: Pd-catalysed indole formation

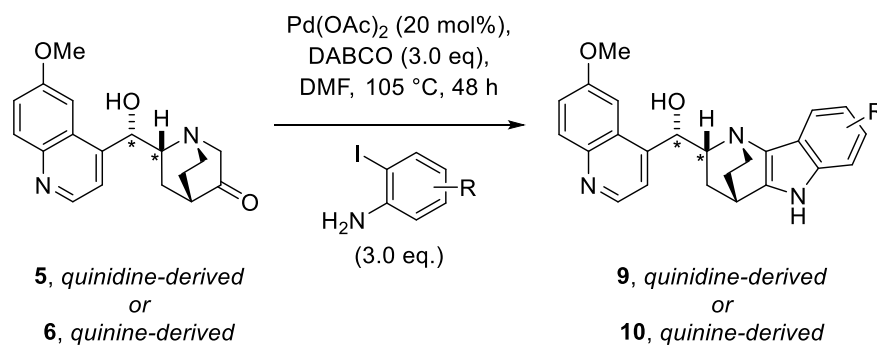

Following a modification of a procedure by Chen *et al.*,<sup>[26]</sup> ketone **5** or **6** (100 mg, 0.32 mmol, 1.0 eq.), 2-iodoaniline (0.96 mmol, 3.0 eq.), DABCO (108 mg, 0.96 mmol, 3.0 eq.) and Pd(OAc)<sub>2</sub> (7 mg, 10 mol%) were added to a 7.0 mL reaction vial equipped with a screw-cap lid bearing a PTFE/silicone septum.<sup>‡</sup> The reactants were dissolved in anhydrous DMF (1.0 mL, 0.3 M) and degassed under a stream of Argon for 10 min. The lid was additionally sealed with parafilm and transferred to a pre-heated heating block at 105 °C (the solvent level in the vial was submerged below level of the heating block). The reaction progress was monitored every 24 h by HPLC-MS. In case of incomplete conversion,<sup>§</sup> the reaction mixture was cooled to rt, and additional Pd(OAc)<sub>2</sub> (7 mg, 10 mol%) was added. The resulting solution was degassed under a stream of argon for 10 min and returned to the heating block for additional 24 h. Following complete conversion of starting ketone (or after a maximum 72 h reaction time) the reaction mixture was cooled to rt, diluted in MeOH (5 mL) and passed through a syringe filter<sup>\*\*</sup>. After removal of the solvents *in vacuo* the products **9** or **10** were purified by column chromatography and/or by mass-directed preparative HPLC (MeCN + 0.1% TFA/H<sub>2</sub>O +0.1%TFA).

<sup>‡</sup> Supelco-27151 vials and Supelco-27019 lids purchased from Sigma-Aldrich

<sup>§</sup> As judged by the presence of the mass (MH<sup>+</sup>) of any unreacted starting ketone by LCMS. In cases where the conversion was deemed to be particularly poor (~5-10%), MgSO<sub>4</sub> (1.5 eq.) was added to the reaction mixture after 24 h, as stipulated.

<sup>\*\*</sup> Chromafil® PET-45/15 MS (729023).

## 6.3 Compound data

### 6.3.1 Preparation of the Cinchona alkaloid derived ketones

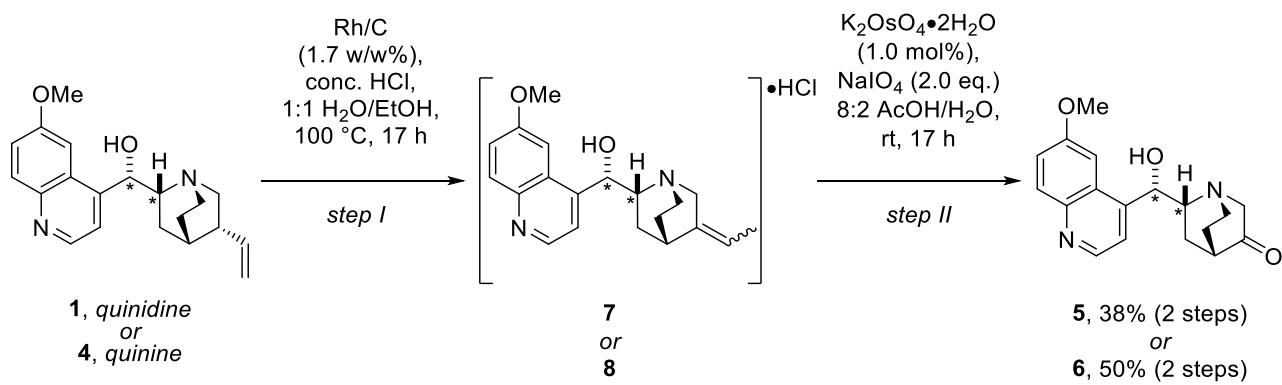

**(1*S*,2*R*,4*S*)-5-Ethylidene-2-[(*S*)-hydroxy(6-methoxyquinolin-4-yl)methyl]-1-azabicyclo[2.2.2]octan-1-ium chloride **7****

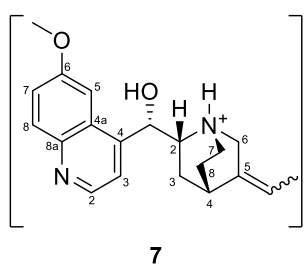

General procedure A, Part I, was followed using quinidine in two batches (2 × 6.0 g, 2 × 18.4 mmol [18.4 mmol in each batch, 36.8 mmol over 2 batches]) to give the title product **7** (15.2 g<sup>††</sup>) as a pale yellow solid which was carried forward to the next step without further purification.

**<sup>1</sup>H NMR** (500 MHz, CD<sub>3</sub>OD, 2:1 mixture of Z/E alkenes, NH<sup>+</sup> and OH not observed): δ 9.05-9.01 (1H, m, quinoline 2-H), 8.31-8.28 (1H, m, quinoline 3-H), 8.22 (1H, d, *J* 9.3, quinoline 8-H), 7.91-7.84 (2H, m, quinoline 5-H and 7-H), 6.67 (0.67H, s, major CH(OH)), 6.65 (0.33H, s, minor CH(OH)), 5.58-5.52 (0.67H, m, major C=CHCH<sub>3</sub>), 5.51-5.44 (0.33H, m, minor C=CHCH<sub>3</sub>), 5.01-4.95 (1H, m, 6-H<sub>A</sub>), 4.19 (2H, s, major OCH<sub>3</sub>), 4.18 (1H, s, minor OCH<sub>3</sub>), 4.09 (0.67H, d, *J* 15.9, major 6-H<sub>B</sub>), 3.98-3.86 (1.33H, m, 2-H and minor 6-H<sub>B</sub>), 3.64-3.56 (1H, m, 7-H<sub>A</sub>), 3.37-3.25 (1H, m, 7-H<sub>B</sub>), 3.13 (0.33H, s, minor 4-H), 2.68 (0.67H, s, major 4-H), 2.35 (1H, app. t, *J* 9.7, 3-H<sub>A</sub>), 1.99-1.84 (2H, m, 8-H<sub>A</sub> and 8-H<sub>B</sub>), 1.72 (1H, d, *J* 6.9, minor C=CHCH<sub>3</sub>), 1.63 (2H, d, *J* 6.9, major C=CHCH<sub>3</sub>), 1.60-1.49 (1H, m, 3-H<sub>B</sub>). **<sup>13</sup>C NMR** (125 MHz, CD<sub>3</sub>OD, 2:1 mixture of Z/E alkenes): δ 162.6 (2 peaks, Ar-C<sub>q</sub>), 158.2 (2 peaks, Ar-C<sub>q</sub>), 141.8 (quinoline 2-C), 134.9 (2 peaks, Ar-C<sub>q</sub>), 132.6 (major 5-C), 131.7 (minor 5-C), 129.6 (quinoline 7-C), 129.2 (2 peaks, Ar-C<sub>q</sub>), 123.9 (quinoline 8-C), 121.3 (quinoline 3-C), 119.5 (minor C=CHCH<sub>3</sub>), 119.4 (major C=CHCH<sub>3</sub>), 103.6 (2 peaks, quinoline 5-C), 68.3 (CH(OH)), 60.7 (major 2-C), 60.5 (minor 2-C), 58.5 (major OCH<sub>3</sub>), 58.4 (minor OCH<sub>3</sub>), 53.1 (minor 6-C), 51.7 (7-C), 51.4 (major 6-C), 32.9 (major 4-C), 26.0 (minor 4-C), 24.6 (2 peaks, major 3-C or major 8-C), 23.9 (minor 3-C or minor 8-C), 23.6 (minor 3-C or minor 8-C), 12.8 (minor C=CHCH<sub>3</sub>), 12.7 (major C=CHCH<sub>3</sub>).

<sup>††</sup> Maximum theoretical yield = 13.3 g.

**(1*S*,2*S*,4*S*)-5-Ethylidene-2-[(*R*)-hydroxy(6-methoxyquinolin-4-yl)methyl]-1-azabicyclo[2.2.2]octan-1-ium chloride **8****

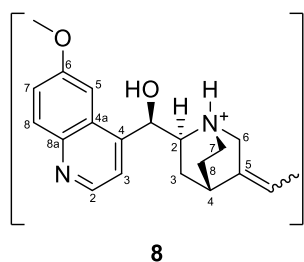

**8**

General procedure A, Part I, was followed using quinine in two batches (2 × 6.0 g, 2 × 18.4 mmol [18.4 mmol in each batch, 36.8 mmol over 2 batches]) to give the title product **8** (14.9 g<sup>‡‡</sup>) as a pale yellow solid which was carried forward to the next step without further purification. <sup>1</sup>H NMR (500 MHz, CD<sub>3</sub>OD, 2:1 mixture of Z/E alkenes, NH<sup>+</sup> and OH not observed): δ 9.08 (1H, d, *J* 3.4, quinoline 2-H), 8.38 (1H, d, *J* 3.4, quinoline 3-H), 8.26 (1H, d, *J* 8.8, quinoline 8-H), 7.90 (0.67H, s, major quinoline 5-H), 7.88 (0.33H, s, minor quinoline 5-H), 7.83 (1H, d, *J* 8.8, quinoline 7-H), 6.71 (1H, s, CH(OH)), 5.56-5.49 (0.67H, m, major C=CHCH<sub>3</sub>), 5.49-5.43 (0.33H, m, minor C=CHCH<sub>3</sub>), 4.47-4.39 (1H, m, 7-H<sub>A</sub>), 4.23 (1H, d, *J* 16.1, 6-H<sub>A</sub>), 4.14-4.01 (1H, m, 6-H<sub>B</sub>), 3.85-3.77 (0.67H, m, major 2-H), 3.77-3.67 (0.33H, s, minor 2-H), 3.47-3.38 (1H, m, 7-H<sub>B</sub>), 3.17 (0.33H, s, minor 4-H), 2.71 (0.67H, s, major 4-H), 2.52-2.41 (1H, m, 3-H<sub>A</sub>), 2.31-2.21 (1H, m, 8-H<sub>A</sub>), 2.02-1.91 (1H, m, 8-H<sub>B</sub>), 1.63 (1H, d, *J* 4.8, minor C=CHCH<sub>3</sub>), 1.57 (2H, d, *J* 5.9, major C=CHCH<sub>3</sub>), 1.53-1.41 (1H, m, 3-H<sub>B</sub>). <sup>13</sup>C NMR (125 MHz, CD<sub>3</sub>OD, 2:1 mixture of Z/E alkenes): δ 162.5 (Ar-C<sub>q</sub>), 158.3 (major Ar-C<sub>q</sub>), 158.2 (minor Ar-C<sub>q</sub>), 141.7 (2 peaks, quinoline 2-C), 134.8 (2 peaks, Ar-C<sub>q</sub>), 131.9 (major 5-C), 131.0 (minor 5-C), 129.6 (major Ar-C<sub>q</sub>), 129.5 (minor Ar-C<sub>q</sub>), 129.1 (quinoline 7-C), 124.0 (minor quinoline 8-C), 123.9 (major quinoline 8-C), 121.4 (quinoline 3-C), 121.2 (minor C=CHCH<sub>3</sub>), 120.9 (major C=CHCH<sub>3</sub>), 103.6 (major quinoline 5-C), 103.5 (minor quinoline 5-C), 68.1 (minor CH(OH)), 68.0 (major CH(OH)), 61.7 (major 2-C), 61.5 (minor 2-C), 58.7 (major OCH<sub>3</sub>), 58.6 (minor OCH<sub>3</sub>), 58.2 (minor 6-C), 56.5 (major 6-C), 46.0 (major 7-C), 45.8 (minor 7-C), 32.6 (major 4-C), 25.8 (minor 4-C), 25.6 (major 8-C), 24.7 (major 3-C), 24.5 (minor 8-C), 23.9 (minor 3-C), 13.0 (minor C=CHCH<sub>3</sub>), 12.8 (major C=CHCH<sub>3</sub>).

<sup>‡‡</sup> Maximum theoretical yield = 13.3 g.

**(1*S*,4*S*,6*R*)-6-[(*S*)-Hydroxy(6-methoxyquinolin-4-yl)methyl]-1-azabicyclo[2.2.2]octan-3-one 5**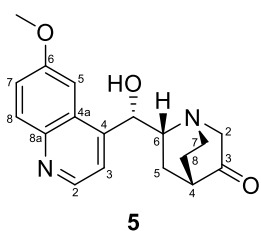

General Procedure A, Part II, was followed using compound **7** (2.0 g, assume 4.9 mmol). Flash column chromatography eluting with 5-35% (50:80:1 CH<sub>2</sub>Cl<sub>2</sub>:EtOH:NH<sub>4</sub>OH<sub>(sat. aq.)</sub>) in CH<sub>2</sub>Cl<sub>2</sub> gave the title product **5** (591 mg,<sup>§§</sup> 1.89 mmol, 38%) as a colourless solid. **<sup>1</sup>H NMR** (500 MHz, CD<sub>3</sub>OD, OH not observed): δ 8.71 (1H, d, *J* 4.6, quinoline 2-H), 8.00 (1H, d, *J* 9.0, quinoline 8-H), 7.72 (1H, d, *J* 4.6, quinoline 3-H), 7.50-7.44 (2H, m, quinoline 5-H and 7-H), 5.76 (1H, d, *J* 2.4, CH(OH)), 4.37 (1H, app. dd, *J* 18.7, 1.9, quinuclidine 2-H<sub>A</sub>), 4.04 (3H, s, OCH<sub>3</sub>), 3.41-3.36 (1H, m, quinuclidine 6-H), 3.26 (1H, d, *J* 18.7, quinuclidine 2-H<sub>B</sub>), 3.20-3.10 (1H, m, quinuclidine 7-H<sub>A</sub>), 2.99 (1H, ddd, *J* 13.9, 10.2, 6.8, quinuclidine 7-H<sub>B</sub>), 2.50-2.38 (2H, m, quinuclidine 4-H and 5-H<sub>A</sub>), 2.06-1.89 (2H, m, quinuclidine 8-H), 1.74-1.65 (1H, m, quinuclidine 5-H<sub>B</sub>). **<sup>13</sup>C NMR** (125 MHz, CD<sub>3</sub>OD, quinuclidine 2-C not observed due to deuterium exchange): δ 220.5 (quinuclidine 3-C), 159.8 (quinoline 6-C), 150.0 (Ar-C<sub>q</sub>), 148.2 (quinoline 2-C), 144.7 (Ar-C<sub>q</sub>), 131.4 (quinoline 8-C), 127.9 (Ar-C<sub>q</sub>), 123.4 (quinoline 7-C), 119.8 (quinoline 3-C), 102.2 (quinoline 5-C), 71.8 (CH(OH)), 59.6 (6-C), 56.4 (OCH<sub>3</sub>), 50.9 (quinuclidine 7-C), 42.2 (quinuclidine 4-C), 25.3 (quinuclidine 5-C or 8-C), 25.2 (quinuclidine 5-C or 8-C). **HRMS** (ESI): C<sub>18</sub>H<sub>21</sub>N<sub>2</sub>O<sub>3</sub> [M+H]<sup>+</sup>; calculated: 313.1549, found: 313.1547. [ $\alpha$ ]<sub>20</sub><sup>D</sup> = +122 (c. 1.0, MeOH).

<sup>§§</sup> Average yield from 8 reaction attempts.

**(1*S*,4*S*,6*S*)-6-[(*R*)-Hydroxy(6-methoxyquinolin-4-yl)methyl]-1-azabicyclo[2.2.2]octan-3-one **6****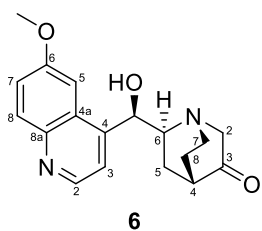

General Procedure A, Part II, was followed using compound **8** (2.0 g, assume 5.1 mmol). Flash column chromatography eluting with 5-35% {50:80:1 CH<sub>2</sub>Cl<sub>2</sub>:EtOH:NH<sub>4</sub>OH(sat. aq.)} in CH<sub>2</sub>Cl<sub>2</sub> gave the title product **6** (788 mg,<sup>\*\*\*</sup> 2.52 mmol, 50%) as a colourless solid. **<sup>1</sup>H NMR** (500 MHz, CD<sub>3</sub>OD, OH not observed): δ 8.67 (1H, d, *J* 4.6, quinoline 2-H), 7.94 (1H, d, *J* 9.2, quinoline 8-H), 7.71 (1H, d, *J* 4.6, quinoline 3-H), 7.46 (1H, d, *J* 2.7, quinoline 5-H), 7.42 (1H, dd, *J* 9.2, 2.7, quinoline 7-H), 5.69 (1H, d, *J* 3.7, CH(OH)), 3.98 (3H, s, OCH<sub>3</sub>), 3.90-3.82 (1H, m, quinuclidine 7-H<sub>A</sub>), 3.37-3.23 (3H, m, quinuclidine 2-H<sub>A</sub> and 2-H<sub>B</sub> and quinuclidine 6-H), 2.88-2.80 (1H, m, quinuclidine 7-H<sub>B</sub>), 2.49-2.38 (2 H, m, quinuclidine 4-H and quinuclidine 5-H<sub>A</sub>), 2.27-2.19 (1H, m, quinuclidine 8-H<sub>A</sub>), 1.97-1.86 (1H, m, quinuclidine 8-H<sub>B</sub>), 1.74-1.65 (1H, m, quinuclidine 5-H<sub>B</sub>). **<sup>13</sup>C NMR** (125 MHz, CD<sub>3</sub>OD): δ 220.2 (quinuclidine 3-C), 159.7 (quinoline 6-C), 150.5 (Ar-C<sub>q</sub>), 148.2 (quinoline 2-C), 144.8 (Ar-C<sub>q</sub>), 131.3 (quinoline 8-C), 128.2 (Ar-C<sub>q</sub>), 123.4 (quinoline 7-C), 120.0 (quinoline 3-C), 102.6 (quinoline 5-C), 71.9 (CH(OH)), 65.5 (2-C), 61.4 (quinuclidine 6-C), 56.4 (OCH<sub>3</sub>), 43.6 (quinuclidine 7-C), 41.9 (quinuclidine 4-C), 26.1 (quinuclidine 5-C), 25.8 (quinuclidine 8-C). **HRMS** (ESI): C<sub>18</sub>H<sub>21</sub>N<sub>2</sub>O<sub>3</sub> [M+H]<sup>+</sup>; calculated: 313.1547, found: 313.1548. [ $\alpha$ ]<sub>20</sub><sup>D</sup> = -147 (c. 0.1, MeOH).

<sup>\*\*\*</sup> Average yield from 10 reaction attempts.



## 6.3.2 Preparation of the Cinchona alkaloid derived indoles

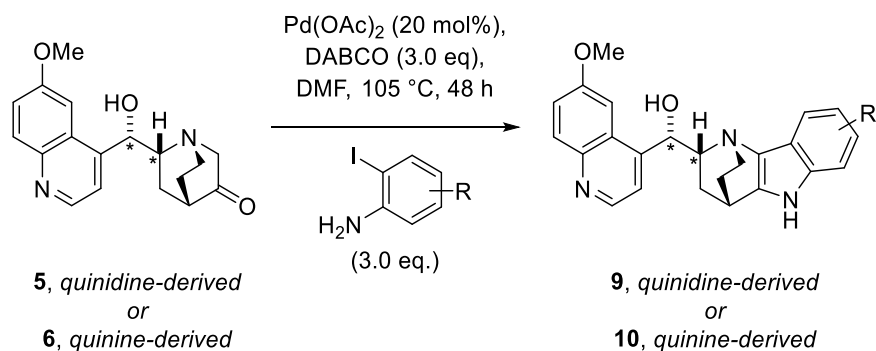

**4, 5, 6, 7 = R = H:**

**9a** (49%); **10a** (17%)

**4 = R; 5-7 = H. R =**

**Me:** **9b** (49%); **10b** (46%)

**CO<sub>2</sub>Me:** **9c** (18%)<sup>a</sup>; **10c** (12%)<sup>a</sup>

**Cl:** **9d** (77%)<sup>b</sup>; **10d** (10%)<sup>b</sup>

**5 = R; 4, 6-7 = H. R =**

**Me:** **9e** (45%); **10e** (4%)

**CO<sub>2</sub>H:** **9f** (14%)<sup>a,d</sup>; **10f** (9%)<sup>b,d</sup>

**CO<sub>2</sub>Me:** **9g** (3%)<sup>a,d</sup>

**CF<sub>3</sub>:** **9h** (25%); **10h** (23%)<sup>a</sup>

**NO<sub>2</sub>:** **9i** (12%)<sup>a,d</sup>; **10i** (3%)<sup>a,d</sup>

**OMe:** **9j** (23%)<sup>a,c</sup>; **10j** (6%)<sup>a</sup>

**OCF<sub>3</sub>:** **10k** (65%)<sup>b</sup>

**F:** **9l** (19%)<sup>d</sup>; **10l** (47%)

**Cl:** **9m** (48%); **10m** (59%)<sup>b,d</sup>

**Br:** **9n** (8%)<sup>d</sup>; **10n** (15%)

**6 = R; 4-5, 7 = H. R =**

**Me:** **9o** (12%)<sup>a,d</sup>; **10o** (4%)

**CO<sub>2</sub>H:** **9p** (11%)<sup>b,d</sup>; **10p** (14%)<sup>d</sup>

**CO<sub>2</sub>Me:** **9q** (7%)<sup>a</sup>

**CF<sub>3</sub>:** **9r** (25%); **10r** (70%)<sup>b</sup>

**Cl:** **9s** (26%); **10s** (20%)

**Br:** **9t** (9%)<sup>a,d</sup>; **10t** (27%)<sup>a</sup>

**7 = R; 4-6 = H. R =**

**OMe:** **9u** (16%)<sup>a,d</sup>; **10u** (33%)<sup>a,d</sup>

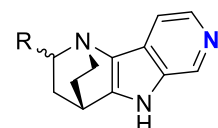

**9v** (50%)<sup>d</sup>;

**10v** (65%)<sup>b</sup>

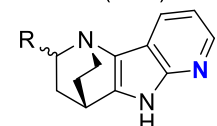

**9w** (17%)<sup>d</sup>;

**10w** (13%)<sup>a,d</sup>

### 6.3.2.1 Preparation of the quinidine-derived indoles

#### (S)-(11S,13R)-1,9-Diazatetracyclo[9.2.2.0<sup>2,10</sup>.0<sup>3,8</sup>]pentadeca-2(10),3(8),4,6-tetraen-13-yl(6-methoxyquinolin-4-yl)methanol **9a**

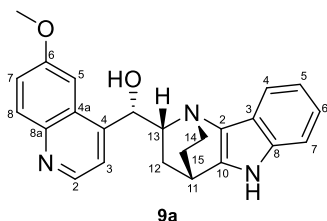

Prepared according to General Procedure B using ketone **5** and 20 mol% Pd(OAc)<sub>2</sub> (48 h). Flash column chromatography eluting with 20% {50:80:1 CH<sub>2</sub>Cl<sub>2</sub>:EtOH:NH<sub>4</sub>OH} in CH<sub>2</sub>Cl<sub>2</sub> gave the *title compound* **9a** (60 mg, 0.16 mmol, 49%) as a pale brown solid. **<sup>1</sup>H NMR** (500 MHz, CD<sub>3</sub>OD, NH and OH not observed): δ 8.70 (1H, d, *J* 4.6, quinoline 2-H), 7.95 (1H, d, *J* 9.2, quinoline 8-H), 7.53 (1H, d, *J* 4.6, quinoline 3-H), 7.39-7.34 (2H, m, 7-H and quinoline 7-H), 7.16 (1H, d, *J* 2.3, quinoline 5-H), 7.03-6.97 (1H, m, 6-H), 6.85-6.76 (2H, m, 4-H and 5-H), 5.47 (1H, s, OH), 4.55 (1H, d, *J* 9.0, CH(OH)), 4.01-3.90 (1H, m, 13-H), 3.52-3.48 (1H, m, 11-H), 3.42 (3H, s, OCH<sub>3</sub>), 3.23-3.13 (1H, m, 14-H<sub>A</sub>), 2.46 (1H, app. td, *J* 11.1, 5.1, 14-H<sub>B</sub>), 2.27 (1H, ddd, *J* 12.4, 8.2, 3.0, 12-H<sub>A</sub>), 2.00-1.92 (1H, m, 15-H<sub>A</sub>), 1.91-1.84 (1H, m, 12-H<sub>B</sub>), 1.55-1.46 (1H, m, 15-H<sub>B</sub>). **<sup>13</sup>C NMR** (125 MHz, CD<sub>3</sub>OD, 1 × Ar-C<sub>q</sub> not observed): δ 159.0 (quinoline 6-C), 150.2 (Ar-C<sub>q</sub>), 148.2 (quinoline 2-C), 145.2 (Ar-C<sub>q</sub>), 142.7 (Ar-C<sub>q</sub>), 135.9 (Ar-C<sub>q</sub>), 131.0 (quinoline 8-C), 129.2 (Ar-C<sub>q</sub>), 124.0 (Ar-C<sub>q</sub>), 123.6 (quinoline 7-C), 121.5 (quinoline 3-C), 121.1 (6-C), 120.2 (4-C or 5-C), 117.6 (4-C or 5-C), 112.6 (7-C), 103.4 (quinoline 5-C), 74.0 (CH(OH)), 66.4 (13-C), 55.6 (OCH<sub>3</sub>), 54.8 (14-C), 35.2 (12-C), 29.2 (11-C), 28.9 (15-C). **HRMS** (ESI): C<sub>24</sub>H<sub>24</sub>N<sub>3</sub>O<sub>2</sub> [M+H]<sup>+</sup>; calculated: 386.1869, found: 386.1866. [α]<sub>D</sub><sup>20</sup> = +116 (c. 0.2, MeOH).

**(S)-(6-Methoxyquinolin-4-yl)[(11S,13R)-4-methyl-1,9-diazatetracyclo[9.2.2.0<sup>2,10</sup>.0<sup>3,8</sup>]pentadeca-2(10),3(8),4,6-tetraen-13-yl]methanol 9b**

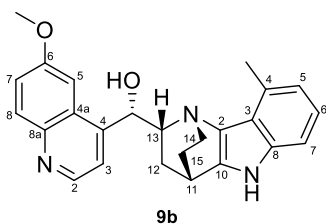

Prepared according to General Procedure B using ketone **5** and 20 mol% Pd(OAc)<sub>2</sub> (48 h). Flash column chromatography eluting with 5-35% {50:80:1 CH<sub>2</sub>Cl<sub>2</sub>:EtOH:NH<sub>4</sub>OH} in CH<sub>2</sub>Cl<sub>2</sub> gave the *title compound 9b* (63 mg, 0.16 mmol, 49%) as a brown solid. **<sup>1</sup>H NMR** (500 MHz, CD<sub>3</sub>OD, NH and OH not observed): δ 8.67 (1H, d, *J* 4.7, quinoline 2-H), 7.88 (1H,

d, *J* 9.2, quinoline 8-H), 7.65 (1H, d, *J* 4.7, quinoline 3-H), 7.29 (1H, dd, *J* 9.2, 2.6, quinoline 7-H), 7.10 (1H, d, *J* 8.1, 7-H), 6.88 (1H, d, *J* 2.6, quinoline 5-H), 6.80 (1H, app. t, *J* 7.6, 6-H), 6.40 (1H, d, *J* 7.1, 5-H), 4.59 (1H, d, *J* 8.9, CH(OH)), 3.86 (1H, app. td, *J* 8.5, 5.2, 13-H), 3.43-3.39 (1H, m, 11-H), 3.26-3.21 (4H, m, includes 14-H<sub>A</sub>; and at δ 3.26: 3H, s, OCH<sub>3</sub>), 2.52 (1H, ddd, *J* 12.4, 10.8, 4.9, 14-H<sub>B</sub>), 2.21-2.14 (1H, m, 15-H<sub>A</sub>), 1.92-1.82 (2H, m, 12-H<sub>A</sub> and 15-H<sub>B</sub>), 1.47-1.38 (4H, m, includes 12-H<sub>B</sub>; and at δ 1.44: 3H, s, CH<sub>3</sub>). **<sup>13</sup>C NMR** (125 MHz, CD<sub>3</sub>OD): δ 159.2 (quinoline 6-C), 150.2 (Ar-C<sub>q</sub>), 148.1 (quinoline 2-C), 145.0 (Ar-C<sub>q</sub>), 142.5 (Ar-C<sub>q</sub>), 135.7 (Ar-C<sub>q</sub>), 130.8 (quinoline 8-C), 129.8 (Ar-C<sub>q</sub>), 129.2 (Ar-C<sub>q</sub>), 124.0 (Ar-C<sub>q</sub>), 123.9 (Ar-C<sub>q</sub>), 123.7 (quinoline 7-C), 121.0 (5-C or 6-C), 120.9 (5-C or 6-C), 120.6 (quinoline 3-C), 109.8 (7-C), 102.3 (quinoline 5-C), 72.2 (CH(OH)), 65.5 (13-C), 55.5 (OCH<sub>3</sub>), 54.1 (14-C), 35.2 (15-C), 29.2 (11-C and 12-C), 17.9 (C<sub>q</sub>CH<sub>3</sub>). **HRMS** (ESI): C<sub>25</sub>H<sub>26</sub>N<sub>3</sub>O<sub>2</sub> [M+H]<sup>+</sup>; calculated: 400.2020, found: 400.2010.  $[\alpha]_{20}^D = +317$  (c. 0.1, MeOH).

**Methyl (11*S*,13*R*)-13-[(*S*)-hydroxy(6-methoxyquinolin-4-yl)methyl]-1,9-diazatetracyclo[9.2.2.0<sup>2,10</sup>.0<sup>3,8</sup>]pentadeca-2(10),3(8),4,6-tetraene-4-carboxylate **9c****

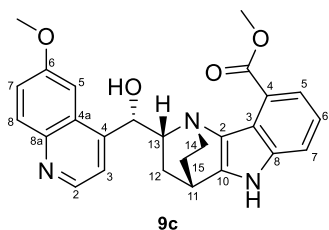

Prepared according to General Procedure B using ketone **5** and 30 mol% Pd(OAc)<sub>2</sub> (72 h). Flash column chromatography eluting with 5-20% {50:80:1 CH<sub>2</sub>Cl<sub>2</sub>:EtOH:NH<sub>4</sub>OH} in CH<sub>2</sub>Cl<sub>2</sub> gave the *title compound* **9c** (25 mg, 56 μmol, 18%) as a pale brown solid. <sup>1</sup>H NMR (700 MHz, CD<sub>3</sub>OD, NH and OH not observed): δ 8.75 (1H, d, *J* 4.4, quinoline 2-H), 8.15 (1H, app. s, 5-H), 8.01 (1H, d, *J* 9.1, quinoline 8-H), 7.57 (1H, d, *J* 8.3, 7-H), 7.55 (1H, d, *J* 4.4, quinoline 3-H), 7.43 (1H, dd, *J* 9.1, 2.3, quinoline 7-H), 7.20 (1H, s, quinoline 5-H), 6.85 (1H, app. d, *J* 8.2, 6-H), 4.58 (1H, d, *J* 8.6, CH(OH)), 4.02-3.94 (1H, m, 13-H), 3.94 (3H, s, CO<sub>2</sub>CH<sub>3</sub>), 3.57 (1H, app. s, 11-H), 3.49 (3H, s, ArOCH<sub>3</sub>), 3.27-3.21 (1H, m, 14-H<sub>A</sub>), 2.54-2.48 (1H, m, 14-H<sub>B</sub>), 2.35-2.30 (1H, m, 15-H<sub>A</sub>), 2.07-2.00 (1H, m, 12-H<sub>A</sub>), 1.95-1.89 (1H, m, 15-H<sub>B</sub>), 1.60-1.53 (1H, m, 12-H<sub>B</sub>).

<sup>13</sup>C NMR (125 MHz, CD<sub>3</sub>OD): δ 170.1 (CO<sub>2</sub>CH<sub>3</sub>), 159.1 (quinoline 6-C), 150.3 (quinoline 2-C), 148.2 (Ar-C<sub>q</sub>), 147.7 (Ar-C<sub>q</sub>), 145.2 (Ar-C<sub>q</sub>), 135.0 (Ar-C<sub>q</sub>), 131.1 (quinoline 8-C), 129.1 (Ar-C<sub>q</sub>), 127.5 (Ar-C<sub>q</sub>), 123.5 (quinoline 7-C), 123.1 (Ar-C<sub>q</sub>), 122.3 (Ar-C<sub>q</sub>), 121.4 (2 peaks, 7-C and quinoline 3-C), 117.0 (6-C), 115.1 (5-C), 103.4 (quinoline 5-C), 74.0 (CH(OH)), 66.2 (13-C), 55.5 (ArOCH<sub>3</sub>), 54.3 (14-C), 52.4 (CO<sub>2</sub>CH<sub>3</sub>), 34.9 (15-C), 29.4 (11-C), 28.7 (12-C). HRMS (ESI): C<sub>26</sub>H<sub>26</sub>N<sub>3</sub>O<sub>4</sub> [M+H]<sup>+</sup>; calculated: 444.1918, found: 444.1916. [α]<sub>20</sub><sup>D</sup> = +56.5 (c. 0.2, MeOH).

**(S)-[(11S,13R)-4-Chloro-1,9-diazatetracyclo[9.2.2.0<sup>2,10</sup>.0<sup>3,8</sup>]pentadeca-2(10),3(8),4,6-tetraen-13-yl](6-methoxyquinolin-4-yl)methanol 9d**

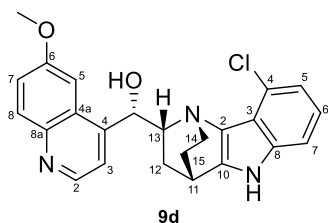

Prepared according to General Procedure B using ketone **5** and 10 mol% Pd(OAc)<sub>2</sub> (24 h). Flash column chromatography eluting with 5-35% {50:80:1 CH<sub>2</sub>Cl<sub>2</sub>:EtOH:NH<sub>4</sub>OH} in CH<sub>2</sub>Cl<sub>2</sub> gave the *title compound* **9d** (103 mg, 0.25 mmol, 77%) as a brown solid. **<sup>1</sup>H NMR** (500 MHz, CD<sub>3</sub>OD, NH and OH not observed): δ 8.65 (1H, d, *J* 4.7, quinoline 2-H), 7.91 (1H,

d, *J* 9.2, quinoline 8-H), 7.60 (1H, d, *J* 4.7, quinoline 3-H), 7.34 (1H, dd, *J* 9.2, 2.6, quinoline 7-H), 7.29 (1H, d, *J* 8.1, 5-H), 7.18 (1H, d, *J* 2.6, quinoline 5-H), 6.91 (1H, app. t, *J* 7.8, 6-H), 6.76 (1H, d, *J* 7.5, 7-H), 4.83 (1H, d, *J* 7.5, CH(OH)), 3.86 (1H, app. dd, *J* 13.4, 7.8, 13-H), 3.54 (3H, s, OCH<sub>3</sub>), 3.50-3.44 (1H, m, 11-H), 3.30-3.26 (1H, m, 14-H<sub>A</sub>), 2.60 (1H, ddd, *J* 12.5, 10.8, 5.1, 14-H<sub>B</sub>), 2.11-2.04 (1H, m, 15-H<sub>A</sub>), 1.96-1.85 (2H, m, 12-H<sub>A</sub> and 15-H<sub>B</sub>), 1.54-1.45 (1H, m, 12-H<sub>B</sub>). **<sup>13</sup>C NMR** (125 MHz, CD<sub>3</sub>OD): δ 159.3 (quinoline 6-C), 150.0 (Ar-C<sub>q</sub>), 148.0 (quinoline 2-C), 145.0 (Ar-C<sub>q</sub>), 144.4 (Ar-C<sub>q</sub>), 136.9 (Ar-C<sub>q</sub>), 130.9 (quinoline 8-C), 129.6 (Ar-C<sub>q</sub>), 124.4 (Ar-C<sub>q</sub>), 123.4 (quinoline 7-C), 122.8 (Ar-C<sub>q</sub>), 122.3 (Ar-C<sub>q</sub>), 121.3 (6-C), 120.7 (7-C and quinoline 3-C), 111.3 (5-C), 102.7 (quinoline 5-C), 72.7 (CH(OH)), 65.3 (13-C), 55.8 (OCH<sub>3</sub>), 54.3 (14-C), 33.9 (15--C), 29.3 (11-C), 28.8 (12-C). **HRMS** (ESI): C<sub>24</sub>H<sub>23</sub><sup>35</sup>ClN<sub>3</sub>O<sub>2</sub> [M+H]<sup>+</sup>; calculated: 420.1473, found: 420.1473. [α]<sub>20</sub><sup>D</sup> = +186 (c. 0.1, MeOH).

**(S)-(6-Methoxyquinolin-4-yl)[(11S,13R)-5-methyl-1,9-diazatetracyclo[9.2.2.0<sup>2,10</sup>.0<sup>3,8</sup>]pentadeca-2(10),3(8),4,6-tetraen-13-yl]methanol 9e**

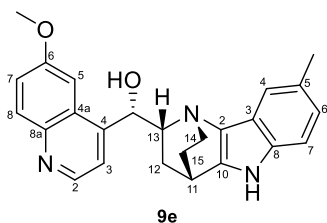

Prepared according to General Procedure B using ketone **5** and 20 mol% Pd(OAc)<sub>2</sub> (48 h). Flash column chromatography eluting with 5-20% {50:80:1 CH<sub>2</sub>Cl<sub>2</sub>:EtOH:NH<sub>4</sub>OH} in CH<sub>2</sub>Cl<sub>2</sub> gave the *title compound 9e* (58 mg, 0.15 mmol, 45%) as a pale brown solid. **<sup>1</sup>H NMR** (700 MHz, CD<sub>3</sub>OD, NH and OH not observed): δ 8.77 (1H, d, *J* 4.6, quinoline 2-H),

8.01 (1H, d, *J* 9.1, quinoline 8-H), 7.64 (1H, d, *J* 4.6, quinoline 3-H), 7.41 (1H, dd, *J* 9.1, 2.5, quinoline 7-H), 7.27 (1H, d, *J* 8.2, 7-H), 7.01 (1H, d, *J* 2.5, quinoline 5-H), 6.86 (1H, dd, *J* 8.2, 1.0, 6-H), 6.38 (1H, s, 4-H), 4.58 (1H, d, *J* 9.3, CH(OH)), 3.93 (1H, td, *J* 8.5, 5.2, 13-H), 3.52-3.49 (1H, m, 11-H), 3.37 (3H, s, OCH<sub>3</sub>), 3.20 (1H, ddd, *J* 12.6, 8.7, 4.0, 14-H<sub>A</sub>), 2.50-2.44 (1H, m, 14-H<sub>B</sub>), 2.34 (1H, ddd, *J* 12.6, 8.1, 3.0, 12-H<sub>A</sub>), 2.21 (3H, s, CH<sub>3</sub>), 2.02-1.97 (1H, m, 15-H<sub>A</sub>), 1.91-1.87 (1H, m, 12-H<sub>B</sub>), 1.57-1.51 (1H, m, 15-H<sub>B</sub>). **<sup>13</sup>C NMR** (175 MHz, CD<sub>3</sub>OD): δ 158.9 (quinoline 6-C), 150.6 (Ar-C<sub>q</sub>), 148.3 (quinoline 2-C), 145.4 (Ar-C<sub>q</sub>), 142.9 (Ar-C<sub>q</sub>), 134.3 (Ar-C<sub>q</sub>), 130.9 (quinoline 8-C), 129.3 (Ar-C<sub>q</sub>), 129.2 (Ar-C<sub>q</sub>), 124.2 (Ar-C<sub>q</sub>), 123.7 (quinoline 7-C), 122.6 (6-C), 121.9 (Ar-C<sub>q</sub>), 121.1 (quinoline 3-C), 117.8 (4-C), 112.2 (7-C), 103.2 (quinoline 5-C), 73.2 (CH(OH)), 66.8 (13-C), 55.4 (OCH<sub>3</sub>), 54.2 (14-C), 35.6 (12-C), 29.2 (11-C or 15-C), 29.1 (11-C or 15-C), 21.6 (CH<sub>3</sub>). **HRMS** (ESI): C<sub>25</sub>H<sub>26</sub>N<sub>3</sub>O<sub>2</sub> [M+H]<sup>+</sup>; calculated: 400.2020, found: 400.2017.  $[\alpha]_{20}^D = -12$  (c. 0.1, MeOH).

**(1*R*,11*S*,13*R*)-5-Carboxy-13-[(*S*)-hydroxy(6-methoxyquinolin-4-yl)methyl]-1,9-diazatetracyclo[9.2.2.0<sup>2,10</sup>.0<sup>3,8</sup>]pentadeca-2(10),3(8),4,6-tetraen-1-ium trifluoroacetate **9f****

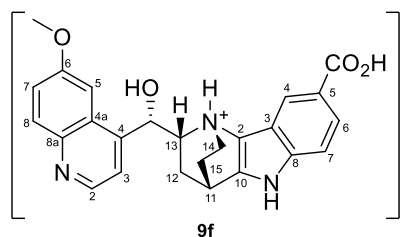

Prepared according to General Procedure B using ketone **5** and 30 mol% Pd(OAc)<sub>2</sub> (72 h). Purification by mass-directed preparative HPLC (MeCN in H<sub>2</sub>O + 0.1% TFA; Rt = 6.2 min) followed by flash column chromatography eluting with 1:9 MeOH/CH<sub>2</sub>Cl<sub>2</sub> gave the *title compound* **9f** (24 mg,

45 μmol, 14%) as a colourless solid. <sup>1</sup>H NMR (600 MHz, CD<sub>3</sub>OD, CO<sub>2</sub>H, NH<sup>+</sup>, NH and OH not observed): δ 8.93 (1H, d, *J* 5.4, quinoline 2-H), 8.17 (1H, d, *J* 9.4, quinoline 8-H), 8.03 (1H, d, *J* 5.5, quinoline 3-H), 7.92-7.87 (2H, m, indole 4-H and indole 6-H), 7.75 (1H, dd, *J* 9.4, 2.5, quinoline 7-H), 7.58 (1H, d, *J* 8.6, indole 7-H), 7.39 (1H, d, *J* 2.5, quinoline 5-H), 5.56 (1H, d, *J* 6.0, CH(OH)), 4.65-4.60 (1H, m, 13-H), 4.00-3.93 (1H, m, 14-H<sub>A</sub>), 3.87-3.83 (1H, m, 11-H), 3.69 (3H, s, OCH<sub>3</sub>), 3.19-3.11 (1H, m, 14-H<sub>B</sub>), 2.38-2.32 (1H, m, 12-H<sub>A</sub>), 2.31-2.22 (1H, m, 15-H<sub>A</sub>), 2.15-2.10 (1H, m, 12-H<sub>B</sub>), 1.91-1.83 (1H, m, 15-H<sub>B</sub>). <sup>13</sup>C NMR (125 MHz, CD<sub>3</sub>OD, CF<sub>3</sub>CO<sub>2</sub><sup>-</sup> not observed): δ 170.4 (CO<sub>2</sub>H), 170.0 (indole 5-C), 163.1 (q, *J*<sub>CF</sub> 38.1, CF<sub>3</sub>CO<sub>2</sub><sup>-</sup>), 161.6 (quinoline 6-C), 150.2 (Ar-C<sub>q</sub>), 143.1 (quinoline 2-C), 141.6 (Ar-C<sub>q</sub>), 138.2 (Ar-C<sub>q</sub>), 129.4 (Ar-C<sub>q</sub>), 128.5 (quinoline 7-C), 125.3 (quinoline 8-C), 124.5 (indole 4-C or indole 6-C), 124.5 (Ar-C<sub>q</sub>), 122.4 (Ar-C<sub>q</sub>), 122.1 (quinoline 3-C), 120.4 (indole 4-C or indole 6-C), 114.1 (Ar-C<sub>q</sub>), 113.2 (indole 7-C), 103.4 (quinoline 5-C), 69.7 (CH(OH)), 68.1 (13-C), 57.1 (14-C), 56.6 (OCH<sub>3</sub>), 30.6 (12-C), 28.6 (11-C), 25.4 (15-C). **HRMS** (ESI): C<sub>25</sub>H<sub>24</sub>O<sub>4</sub>N<sub>3</sub> [M+H]<sup>+</sup>; calculated: 430.17613, found: 430.17615. [α]<sub>D</sub><sup>20</sup> = +42 (c. 0.1, MeOH).

**(1*R*,11*S*,13*R*)-13-[(*S*)-hydroxy(6-methoxyquinolin-4-yl)methyl]-5-(methoxycarbonyl)-1,9-diazatetracyclo[9.2.2.0<sup>2,10</sup>.0<sup>3,8</sup>]pentadeca-2(10),3(8),4,6-tetraen-1-ium trifluoroacetate **9g****

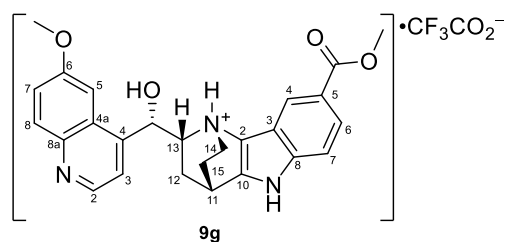

Prepared according to General Procedure B using ketone **5** and 30 mol% Pd(OAc)<sub>2</sub> (72 h). Flash column chromatography eluting with 1:9 to 1:4 ({50:80:1 CH<sub>2</sub>Cl<sub>2</sub>:EtOH:NH<sub>4</sub>OH}/CH<sub>2</sub>Cl<sub>2</sub>) followed by mass-directed preparative HPLC (MeCN in H<sub>2</sub>O + 0.1% TFA; Rt = 12 min) gave the *title compound* **9g** (6 mg,

10 μmol, 3%) as a yellow solid. **<sup>1</sup>H NMR** (600 MHz, CD<sub>3</sub>OD, NH<sup>+</sup>, NH and OH not observed): δ 8.86 (1H, d, *J* 5.0, quinoline 2-H), 8.12 (1H, d, *J* 9.3, quinoline 8-H), 7.89 (1H, dd, *J* 8.6, 1.4, indole 6-H), 7.86 (1H, d, *J* 5.0, quinoline 2-H), 7.73 (1H, s, indole 4-H), 7.61 (1H, dd, *J* 9.3, 2.6, quinoline 7-H), 7.58 (1H, d, *J* 8.6, indole 7-H), 7.19 (1H, d, *J* 2.3, quinoline 5-H), 5.28 (1H, d, *J* 6.7, CH(OH)), 4.59-4.55 (1H, m, 13-H), 3.94-3.88 (4H, m, CO<sub>2</sub>CH<sub>3</sub> or OCH<sub>3</sub> and 14-H<sub>A</sub>), 3.86-3.83 (1H, m, 11-H), 3.56 (3H, s, CO<sub>2</sub>CH<sub>3</sub> or OCH<sub>3</sub>), 3.11-3.04 (1H, m, 14-H<sub>B</sub>), 2.45-2.39 (1H, m, 12-H<sub>A</sub>), 2.32-2.26 (1H, m, 15-H<sub>A</sub>), 2.13-2.09 (1H, m, 12-H<sub>B</sub>), 1.88-1.81 (1H, m, 15-H<sub>B</sub>). **<sup>13</sup>C NMR** (150 MHz, CD<sub>3</sub>OD, CF<sub>3</sub>CO<sub>2</sub><sup>-</sup> not observed): δ 169.1 (CO<sub>2</sub>CH<sub>3</sub>), 163.2 (q, *J*<sub>CF</sub> 37.2, CF<sub>3</sub>CO<sub>2</sub><sup>-</sup>), 160.7 (quinoline 6-C), 145.6 (quinoline 2-C), 142.1 (Ar-C<sub>q</sub>), 141.9 (Ar-C<sub>q</sub>), 138.2 (Ar-C<sub>q</sub>), 128.9 (Ar-C<sub>q</sub>), 128.2 (quinoline 8-C), 126.5 (quinoline 7-C), 124.2 (Ar-C<sub>q</sub>), 124.0 (Ar-C<sub>q</sub>), 123.8 (indole 6-C), 121.8 (quinoline 3-C), 120.2 (Ar-C<sub>q</sub>), 119.9 (Ar-C<sub>q</sub>), 113.3 (indole 7-C), 102.9 (quinoline 5-C), 70.0 (CH(OH)), 68.4 (13-C), 56.9 (14-C), 56.2 (CO<sub>2</sub>CH<sub>3</sub> or OCH<sub>3</sub>), 52.4 (CO<sub>2</sub>CH<sub>3</sub> or OCH<sub>3</sub>), 31.3 (12-C), 28.7 (11-C), 25.7 (15-C). **HRMS** (ESI): C<sub>26</sub>H<sub>26</sub>O<sub>4</sub>N<sub>3</sub> [M+H]<sup>+</sup>; calculated: 444.1918, found: 444.1918; C<sub>26</sub>H<sub>25</sub>O<sub>4</sub>NaN<sub>3</sub> [M+Na]<sup>+</sup>; calculated: 466.1737, found: 466.1738.  $[\alpha]_{20}^D = +150$  (c. 0.1, MeOH).



**(S)-(6-Methoxyquinolin-4-yl)[(11S,13R)-5-(trifluoromethyl)-1,9-diazatetracyclo[9.2.2.0<sup>2,10</sup>.0<sup>3,8</sup>]pentadeca-2(10),3(8),4,6-tetraen-13-yl]methanol 9h**

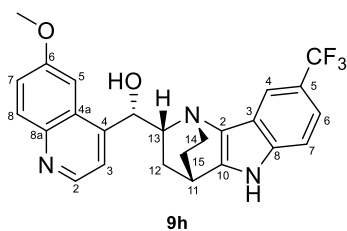

Prepared according to General Procedure B using ketone **5** and 20 mol% Pd(OAc)<sub>2</sub> (48 h). Flash column chromatography eluting with 1:9 to 1:4 ({50:80:1 CH<sub>2</sub>Cl<sub>2</sub>:EtOH:NH<sub>4</sub>OH}/CH<sub>2</sub>Cl<sub>2</sub>) gave the *title compound* **9h** (36 mg, 80 μmol, 25%) as a yellow solid. **<sup>1</sup>H NMR** (500 MHz, CD<sub>3</sub>OD): δ 8.71 (1H, d, *J* 4.6, quinoline 2-H), 7.97 (1H, d, *J* 9.3, quinoline 8-H),

7.54-7.49 (2H, m, quinoline 3-H and indole 7-H), 7.38 (1H, dd, *J* 9.3, 2.7, quinoline 7-H), 7.27 (1H, dd, *J* 8.6, 1.7, indole 6-H), 7.10 (1H, d, *J* 2.7, quinoline 5-H), 7.07 (1H, s, indole 4-H), 4.56 (1H, d, *J* 8.8, CH(OH)), 3.95 (1H, app. td, *J* 8.5, 5.3, 13-H), 3.57-3.54 (1H, m, 11-H), 3.41 (3 H, s, OCH<sub>3</sub>), 3.26-3.20 (1H, m, 14-H<sub>A</sub>), 2.51-2.44 (1H, m, 14-H<sub>B</sub>), 2.35-2.28 (1H, m, 12-H<sub>A</sub>), 2.01-1.98 (1H, m, 15-H<sub>A</sub>), 1.94-1.84 (1H, m, 12-H<sub>B</sub>), 1.58-1.46 (1H, m, 15-H<sub>B</sub>). **<sup>13</sup>C NMR** (125 MHz, CD<sub>3</sub>OD): δ 159.1 (quinoline 6-C), 150.2 (Ar-C<sub>q</sub>), 145.3 (quinoline 2-C), 145.2 (Ar-C<sub>q</sub>), 137.1 (Ar-C<sub>q</sub>), 130.9 (quinoline 8-C), 129.0 (Ar-C<sub>q</sub>), 128.0 (Ar-C<sub>q</sub>), 126.9 (q, *J*<sub>CF</sub> 270.7, CF<sub>3</sub>), 125.8 (Ar-C<sub>q</sub>), 123.8 (quinoline 7-C), 123.3 (Ar-C<sub>q</sub>), 122.5 (q, *J*<sub>CF</sub> 31.3, indole 5-C), 121.3 (quinoline 3-C), 117.5 (q, *J*<sub>CF</sub> 3.8, indole 6-C), 115.1 (q, *J*<sub>CF</sub> 4.6, indole 4-C), 113.1 (indole 7-C), 102.9 (quinoline 5-C), 73.8 (CH(OH)), 66.2 (13-C), 55.4 (OCH<sub>3</sub>), 54.3 (14-C), 35.1 (12-C), 29.3 (11-C), 28.9 (15-C). **HRMS** (ESI): C<sub>25</sub>H<sub>23</sub>O<sub>2</sub>N<sub>3</sub>F<sub>3</sub> [M+H]<sup>+</sup>; calculated: 454.1737, found: 454.1734. [α]<sub>20</sub><sup>D</sup> = +174 (c. 0.1, MeOH).

**(1*R*,11*S*,13*R*)-13-[(*S*)-Hydroxy(6-methoxyquinolin-4-yl)methyl]-5-nitro-1,9-diazatetracyclo[9.2.2.0<sup>2,10</sup>.0<sup>3,8</sup>]pentadeca-2(10),3(8),4,6-tetraen-1-ium trifluoroacetate **9i****

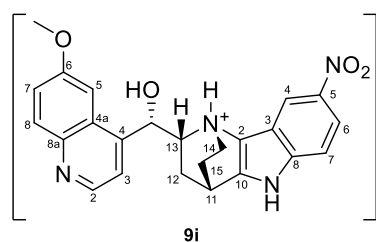

Prepared according to General Procedure B using ketone **5** and 30 mol% Pd(OAc)<sub>2</sub> (96 h). Flash column chromatography eluting with 1:9 to 1:3 ({50:80:1 CH<sub>2</sub>Cl<sub>2</sub>:EtOH:NH<sub>4</sub>OH}/CH<sub>2</sub>Cl<sub>2</sub>) followed by mass-directed preparative HPLC (MeCN in H<sub>2</sub>O + 0.1% TFA; Rt = 9.0 min) gave the *title compound 9i* (20 mg,

38 μmol, 12%) as a yellow solid. <sup>1</sup>H NMR (500 MHz, CD<sub>3</sub>OD, NH<sup>+</sup>, NH and OH not observed): δ 8.93 (1H, d, *J* 5.5, quinoline 2-H), 8.18 (1H, d, *J* 9.4, quinoline 8-H), 8.16 (1H, d, *J* 2.4, indole 4-H), 8.11 (1H, dd, *J* 9.1, 2.4, indole 6-H), 8.01 (1H, d, *J* 5.5, quinoline 3-H), 7.73 (1H, dd, *J* 9.4, 2.6, quinoline 7-H), 7.65 (1H, d, *J* 9.1, indole 7-H), 7.43 (1H, d, *J* 2.6, quinoline 5-H), 5.70 (1H, d, *J* 5.4, CH(OH)), 4.55-4.50 (1H, m, 13-H), 3.97-3.92 (1H, m, 14-H<sub>A</sub>), 3.87-3.83 (1H, m, 11-H), 3.74 (3 H, s, OCH<sub>3</sub>), 3.17-3.10 (1H, m, 14-H<sub>B</sub>), 2.29-2.21 (2 H, m, 12-H<sub>A</sub> and 15-H<sub>A</sub>), 2.12-2.06 (1H, m, 15-H<sub>B</sub>), 1.90-1.81 (1H, m, 12-H<sub>B</sub>). <sup>13</sup>C NMR (125 MHz, CD<sub>3</sub>OD): δ 162.7 (d, *J*<sub>CF</sub> 36.5, CF<sub>3</sub>CO<sub>2</sub><sup>-</sup>), 161.5 (quinoline 6-C), 155.8 (Ar-C<sub>q</sub>), 144.0 (Ar-C<sub>q</sub>), 143.5 (Ar-C<sub>q</sub>), 143.3 (quinoline 2-C), 138.6 (Ar-C<sub>q</sub>), 137.3 (Ar-C<sub>q</sub>), 129.3 (Ar-C<sub>q</sub>), 128.3 (quinoline 7-H), 125.5 (quinoline 8-C), 121.8 (quinoline 3-C), 119.9 (Ar-C<sub>q</sub>), 118.0 (q, *J*<sub>CF</sub> 291.5, CF<sub>3</sub>CO<sub>2</sub><sup>-</sup>), 117.9 (indole 6-C), 116.2 (Ar-C<sub>q</sub>), 114.7 (indole 4-C), 113.7 (indole 7-C), 103.3 (quinoline 5-C), 69.5 (CH(OH)), 67.6 (13-C), 56.7 (OCH<sub>3</sub>), 56.7 (14-C), 30.5 (12-C), 28.8 (11-C), 25.4 (15-C). HRMS (ESI): C<sub>24</sub>H<sub>23</sub>O<sub>4</sub>N<sub>4</sub> [M+H]<sup>+</sup>; calculated: 431.1714 found: 431.1709. [α]<sub>20</sub><sup>D</sup> = +199 (c. 0.1, MeOH).

**(S)-[[(11S,13R)-5-Methoxy-1,9-diazatetracyclo[9.2.2.0<sup>2,10</sup>.0<sup>3,8</sup>]pentadeca-2(10),3(8),4,6-tetraen-13-yl][(6-methoxyquinolin-4-yl)methanol 9j**

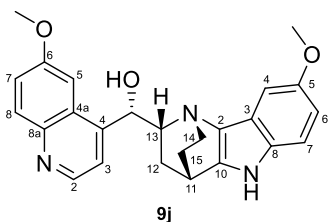

Prepared according to General Procedure B using ketone **5** and 6.0 eq. DABCO (added in one portion at the start of the reaction) and 30 mol% Pd(OAc)<sub>2</sub> (72 h). Flash column chromatography eluting with 5-50% {50:80:1 CH<sub>2</sub>Cl<sub>2</sub>:EtOH:NH<sub>4</sub>OH} in CH<sub>2</sub>Cl<sub>2</sub> gave the *title compound 9j* (31 mg, 74 μmol, 23%) as a colourless solid. <sup>1</sup>H NMR (500 MHz, CD<sub>3</sub>OD, NH and OH not observed):

δ 8.76 (1H, d, *J* 4.6, quinoline 2-H), 8.00 (1H, d, *J* 9.2, quinoline 8-H), 7.64 (1H, d, *J* 4.6, quinoline 3-H), 7.42 (1H, dd, *J* 9.2, 2.5, quinoline 7-H), 7.30 (1H, d, *J* 8.8, 7-H), 7.08 (1H, d, *J* 2.5, quinoline 5-H), 6.72 (1H, dd, *J* 8.8, 2.1, 6-H), 6.25 (1H, d, *J* 2.1, 4-H), 4.74 (1H, d, *J* 8.3, CH(OH)), 4.28-4.18 (1H, m, 13-H), 3.67-3.58 (1H, m, 11-H), 3.52 (3H, s, OCH<sub>3</sub>), 3.51-3.42 (4H, m, includes 14-H<sub>A</sub>; and at δ 3.44 (3H, s, OCH<sub>3</sub>), 2.76-2.64 (1H, m, 14-H<sub>B</sub>), 2.44-2.35 (1H, m, 12-H<sub>A</sub>), 2.16-2.06 (1H, m, 15-H<sub>A</sub>), 2.02-1.95 (1H, m, 12-H<sub>B</sub>), 1.69-1.58 (1H, m, 15-H<sub>B</sub>). <sup>13</sup>C NMR (125 MHz, CD<sub>3</sub>OD, 3 × Ar-C<sub>q</sub> not observed): δ 159.3 (quinoline 6-C), 155.6 (Ar-C<sub>q</sub>), 148.3 (quinoline 2-C), 145.2 (Ar-C<sub>q</sub>), 131.1 (quinoline 8-C), 130.8 (Ar-C<sub>q</sub>), 129.0 (Ar-C<sub>q</sub>), 124.0 (quinoline 7-C), 121.5 (quinoline 3-C), 113.7 (7-C), 112.1 (6-C), 102.9 (quinoline 5-C), 99.0 (4-C), 72.1 (CH(OH)), 67.3 (13-C), 55.6 (2 peaks, 2 × OCH<sub>3</sub>), 55.4 (14-C), 33.9 (15-C), 29.0 (11-C), 27.8 (12-C). HRMS (ESI): C<sub>25</sub>H<sub>26</sub>O<sub>3</sub>N<sub>3</sub> [M+H]<sup>+</sup>; calculated: 416.1969, found: 416.1966. [α]<sub>20</sub><sup>D</sup> = +372 (c. 0.1, MeOH).

**(1*R*,11*S*,13*R*)-5-Fluoro-13-[(*S*)-hydroxy(6-methoxyquinolin-4-yl)methyl]-1,9-diazatetracyclo[9.2.2.0<sup>2,10</sup>.0<sup>3,8</sup>]pentadeca-2(10),3(8),4,6-tetraen-1-ium trifluoroacetate **9I****

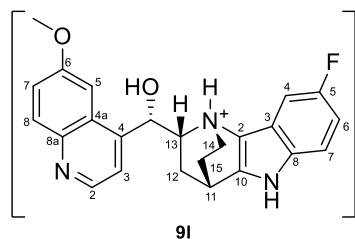

9I

Prepared according to General Procedure B using ketone **5** and 20 mol% Pd(OAc)<sub>2</sub> (48 h). Purification by mass-directed preparative HPLC (MeCN in H<sub>2</sub>O + 0.1% TFA) gave the *title compound 9I* (32 mg, 62 μmol, 19%) as a colourless solid.

**<sup>1</sup>H NMR** (500 MHz, CD<sub>3</sub>OD, NH<sup>+</sup>, NH and OH not observed):

δ 8.91 (1H, d, *J* 4.6, quinoline 2-H), 8.17 (1H, d, *J* 8.9, quinoline 8-H), 8.01-7.92 (1H, m, quinoline 3-H), 7.76 (1H, d, *J* 8.9, quinoline 7-H), 7.52-7.45 (2H, m, includes quinoline 5-H; and at δ 7.48: 1H, dd, *J* 8.8, 4.2, 7-H), 7.01-6.89 (2H, m, 4-H and 6-H), 5.69 (1H, s, CH(OH)), 4.59 (1H, app. dt, *J* 8.6, 5.9, 13-H), 4.02-3.93 (1H, m, 14-H<sub>A</sub>), 3.84-3.79 (4H, m, includes 11-H; and at δ 3.82: 3H, s, OCH<sub>3</sub>), 3.14 (1H, td, *J* 11.5, 5.5, 14-H<sub>B</sub>), 2.30-2.21 (2H, m, 12-H<sub>A</sub> and 15-H<sub>A</sub>), 2.12-2.06 (1H, m, 15-H<sub>B</sub>), 1.88-1.80 (1H, m, 12-H<sub>B</sub>). **<sup>13</sup>C NMR** (125 MHz, CD<sub>3</sub>OD, CF<sub>3</sub>CO<sub>2</sub><sup>-</sup> not observed): δ 161.6 (quinoline 6-C), 159.7 (d, *J* 235.3, 5-C), 143.4 (quinoline 2-C), 141.4 (Ar-C<sub>q</sub>), 132.3 (Ar-C<sub>q</sub>), 129.3 (Ar-C<sub>q</sub>), 128.1 (quinoline 7-C), 126.1 (quinoline 8-C), 122.0 (quinoline 3-C), 120.3 (d, *J* 11.4, Ar-C<sub>q</sub>), 118.2 (Ar-C<sub>q</sub>), 118.0 (Ar-C<sub>q</sub>), 114.5 (d, *J* 9.1, 7-C), 113.4 (Ar-C<sub>q</sub>), 111.2 (d, *J* 26.2, 6-C), 103.4 (quinoline 5-C), 102.7 (d, *J* 24.8, 4-C), 69.6 (CH(OH)), 67.6 (13-C), 57.2 (14-C), 56.8 (OCH<sub>3</sub>), 30.1 (15-C), 28.7 (11-C), 25.2 (12-C). **HRMS** (ESI): C<sub>24</sub>H<sub>23</sub>FN<sub>3</sub>O<sub>2</sub> [M+H]<sup>+</sup>; calculated: 404.1769, found: 404.1765. [α]<sub>D</sub><sup>20</sup> = +69.3 (c. 0.8, MeOH).

**(S)-[[(11S,13R)-5-Chloro-1,9-diazatetracyclo[9.2.2.0<sup>2,10</sup>.0<sup>3,8</sup>]pentadeca-2(10),3(8),4,6-tetraen-13-yl][(6-methoxyquinolin-4-yl)methanol 9m**

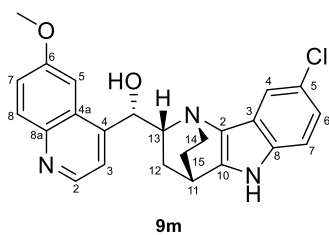

Prepared according to General Procedure B using ketone **5** and 20 mol% Pd(OAc)<sub>2</sub> (48 h). Flash column chromatography eluting with 5-20% {50:80:1 CH<sub>2</sub>Cl<sub>2</sub>:EtOH:NH<sub>4</sub>OH} in CH<sub>2</sub>Cl<sub>2</sub> gave the *title compound 9m* (64 mg, 0.16 mmol, 48%) as a colourless solid. **<sup>1</sup>H NMR** (500 MHz, CD<sub>3</sub>OD, NH and OH not observed): δ 8.73 (1H, d, *J* 4.6, quinoline 2-H),

7.99 (1H, d, *J* 9.2, quinoline 8-H), 7.55 (1H, d, *J* 4.6, quinoline 3-H), 7.42 (1H, dd, *J* 9.2, 2.5, quinoline 7-H), 7.33 (1H, d, *J* 8.6, 7-H), 7.10 (1H, d, *J* 2.5, quinoline 5-H), 6.97 (1H, dd, *J* 8.6, 1.9, 6-H), 6.63 (1H, d, *J* 1.9, 4-H), 4.56 (1H, d, *J* 8.9, CH(OH)), 3.97-3.89 (1H, m, 13-H), 3.53-3.49 (1H, m, 11-H), 3.47 (3H, s, OCH<sub>3</sub>), 3.23-3.16 (1H, m, 14-H<sub>A</sub>), 2.49-2.42 (1H, m, 14-H<sub>B</sub>), 2.33-2.26 (1H, m, 12-H<sub>A</sub>), 2.01-1.94 (1H, m, 15-H<sub>A</sub>), 1.90-1.83 (1H, m, 12-H<sub>B</sub>), 1.56-1.48 (1H, m, 15-H<sub>B</sub>). **<sup>13</sup>C NMR** (125 MHz, CD<sub>3</sub>OD): δ 159.1 (quinoline 6-C), 150.4 (Ar-C<sub>q</sub>), 148.2 (Ar-C<sub>q</sub>), 145.2 (quinoline 2-C), 144.8 (Ar-C<sub>q</sub>), 134.2 (Ar-C<sub>q</sub>), 130.9 (quinoline 8-C), 129.1 (Ar-C<sub>q</sub>), 126.1 (Ar-C<sub>q</sub>), 125.0 (Ar-C<sub>q</sub>), 123.8 (quinoline 7-C), 122.1 (Ar-C<sub>q</sub>), 121.2 (quinoline 3-C), 121.0 (6-C), 117.2 (4-C), 113.7 (7-C), 103.1 (quinoline 5-C), 73.6 (CH(OH)), 66.4 (13-C), 55.5 (OCH<sub>3</sub>), 54.3 (14-C), 35.2 (15-C), 29.3 (11-C), 28.9 (12-C). **HRMS** (ESI): C<sub>24</sub>H<sub>23</sub><sup>35</sup>ClN<sub>3</sub>O<sub>2</sub> [M+H]<sup>+</sup>; calculated: 420.1473, found: 420.1476. [α]<sub>D</sub><sup>20</sup> = +158 (c. 1.0, MeOH).

**(1*R*,11*S*,13*R*)-5-Bromo-13-[(*S*)-hydroxy(6-methoxyquinolin-4-yl)methyl]-1,9-diazatetracyclo[9.2.2.0<sup>2,10</sup>.0<sup>3,8</sup>]pentadeca-2(10),3(8),4,6-tetraen-1-ium trifluoroacetate **9n****

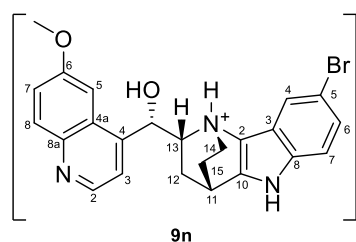

•CF<sub>3</sub>CO<sub>2</sub><sup>-</sup> Prepared according to General Procedure B using ketone **5** and 20 mol% Pd(OAc)<sub>2</sub> (48 h). Flash column chromatography eluting with 1:9 to 1:4 ({50:80:1 CH<sub>2</sub>Cl<sub>2</sub>:EtOH:NH<sub>4</sub>OH}/CH<sub>2</sub>Cl<sub>2</sub>) followed by mass-directed preparative HPLC (MeCN in H<sub>2</sub>O + 0.1% TFA; Rt = 10.3 min) gave the *title compound* **9n** (16 mg, 27 μmol, 8%)

as a yellow solid. **<sup>1</sup>H NMR** (500 MHz, CD<sub>3</sub>OD, NH<sup>+</sup>, NH and OH not observed): δ 8.90 (1H, d, *J* 5.3, quinoline 2-H), 8.16 (1H, d, *J* 9.3, quinoline 8-H), 7.97 (1H, d, *J* 5.3, quinoline 3-H), 7.75 (1H, dd, *J* 9.2, 2.5, quinoline 7-H), 7.43 (1H, d, *J* 8.7, indole 7-H), 7.38 (1H, d, *J* 2.4, quinoline 5-H), 7.30 (1H, dd, *J* 8.7, 1.8, indole 6-H), 7.27 (1H, d, *J* 1.8, indole 4-H), 5.58 (1H, d, *J* 5.8, CH(OH)), 4.57 (1H, dt, *J* 8.6, 5.8, 13-H), 4.00-3.91 (1H, m, 14-H<sub>A</sub>), 3.85-3.79 (1H, m, 11-H), 3.72 (3H, s, OCH<sub>3</sub>), 3.16-3.08 (1H, m, 14-H<sub>B</sub>), 2.34-2.22 (2H, m, 12-H<sub>A</sub> and 15-H<sub>A</sub>), 2.13-2.06 (1H, m, 12-H<sub>B</sub>), 1.90-1.78 (1H, m, 15-H<sub>B</sub>). **<sup>13</sup>C NMR** (125 MHz, CD<sub>3</sub>OD, CF<sub>3</sub>CO<sub>2</sub><sup>-</sup> not observed): δ 162.6 (q, *J*<sub>CF</sub> 35.4, CF<sub>3</sub>CO<sub>2</sub><sup>-</sup>), 161.4 (quinoline 6-C), 154.2 (Ar-C<sub>q</sub>), 143.9 (quinoline 2-C), 141.1 (Ar-C<sub>q</sub>), 138.4 (Ar-C<sub>q</sub>), 134.4 (Ar-C<sub>q</sub>), 129.2 (Ar-C<sub>q</sub>), 127.9 (quinoline 8-C), 126.2 (quinoline 7-C), 125.8 (indole 6-C), 121.9 (quinoline 3-C), 121.6 (Ar-C<sub>q</sub>), 120.1 (indole 4-C), 117.0 (Ar-C<sub>q</sub>), 115.0 (indole 7-C), 114.6 (Ar-C<sub>q</sub>), 103.1 (quinoline 5-C), 69.5 (CH(OH)), 67.9 (13-C), 57.0 (14-C), 56.6 (OCH<sub>3</sub>), 30.5 (12-C), 28.6 (11-C), 25.4 (15-C). **HRMS** (ESI): C<sub>24</sub>H<sub>23</sub>BrN<sub>3</sub>O<sub>2</sub> [M+H]<sup>+</sup>; calculated: 466.0948, found: 466.0945. [α]<sub>20</sub><sup>D</sup> = +127 (c. 0.1, MeOH).

**(1*R*,11*S*,13*R*)-13-[(*S*)-Hydroxy(6-methoxyquinolin-4-yl)methyl]-6-methyl-1,9-diazatetracyclo[9.2.2.0<sup>2,10</sup>.0<sup>3,8</sup>]pentadeca-2(10),3(8),4,6-tetraen-1-ium trifluoroacetate **9o****

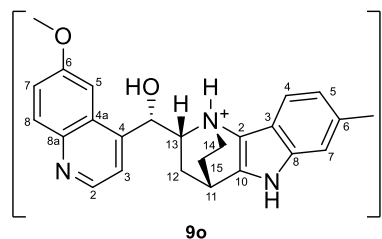

Prepared according to General Procedure B using ketone **5** and 30 mol% Pd(OAc)<sub>2</sub> (72 h). Flash column chromatography eluting with 1:9 to 1:4 ({50:80:1 CH<sub>2</sub>Cl<sub>2</sub>:EtOH:NH<sub>4</sub>OH}/CH<sub>2</sub>Cl<sub>2</sub>) followed by mass-directed preparative HPLC (MeCN in H<sub>2</sub>O + 0.1% TFA; Rt = 9.5 min) gave the *title compound* **9o** (21 mg,

40 μmol, 12%) as a yellow solid. **<sup>1</sup>H NMR** (500 MHz, CD<sub>3</sub>OD, NH<sup>+</sup>, NH and OH not observed): δ 8.82 (1H, d, *J* 5.1, quinoline 2-H), 8.10 (1H, d, *J* 9.3, quinoline 8-H), 7.83 (1H, d, *J* 5.1, quinoline 3-H), 7.64 (1H, dd, *J* 9.3, 2.6, quinoline 7-H), 7.32-7.29 (2 H, m, quinoline 5-H and indole 7-H), 6.96 (1H, d, *J* 8.2, indole 4-H), 6.91 (1H, d, *J* 8.2, indole 5-H), 5.29 (1H, d, *J* 6.8, CH(OH)), 4.65-4.60 (1H, m, 13-H), 3.95-3.89 (1H, m, 14-H<sub>A</sub>), 3.83-3.79 (1H, m, 11-H), 3.66 (3H, s, OCH<sub>3</sub>), 3.11-3.03 (1H, m, 14-H<sub>B</sub>), 2.46 (3H, s, CH<sub>3</sub>), 2.44-2.38 (1H, m, 12-H<sub>A</sub>), 2.31-2.23 (1H, m, 15-H<sub>A</sub>), 2.14-2.08 (1H, m, 12-H<sub>B</sub>), 1.85-1.78 (1H, m, 15-H<sub>B</sub>). **<sup>13</sup>C NMR** (125 MHz, CD<sub>3</sub>OD, CF<sub>3</sub>CO<sub>2</sub><sup>-</sup> not observed): δ 160.8 (quinoline 6-C), 151.2 (Ar-C<sub>q</sub>), 145.3 (quinoline 2-C), 140.6 (Ar-C<sub>q</sub>), 138.8 (Ar-C<sub>q</sub>), 136.2 (Ar-C<sub>q</sub>), 133.3 (Ar-C<sub>q</sub>), 129.1 (Ar-C<sub>q</sub>), 128.0 (quinoline 8-C), 126.5 (quinoline 7-C), 123.6 (indole 5-C), 122.2 (quinoline 3-C), 117.9, 116.9 (indole 4-C), 113.3 (indole 7-C), 112.5 (Ar-C<sub>q</sub>), 103.2 (quinoline 5-C), 70.4 (CH(OH)), 68.4 (13-C), 57.2 (14-C), 56.2 (OCH<sub>3</sub>), 31.0 (12-C), 28.5 (11-C), 25.6 (15-C), 21.7 (CH<sub>3</sub>). **HRMS** (ESI): C<sub>25</sub>H<sub>26</sub>O<sub>2</sub>N<sub>3</sub> [M+H]<sup>+</sup>; calculated: 400.2020, found: 400.2020. [α]<sub>20</sub><sup>D</sup> = +115 (c. 0.1, MeOH).

**(1*R*,11*S*,13*R*)-6-Carboxy-13-[(*S*)-hydroxy(6-methoxyquinolin-4-yl)methyl]-1,9-diaza-tetracyclo[9.2.2.0<sup>2,10</sup>.0<sup>3,8</sup>]pentadeca-2(10),3(8),4,6-tetraen-1-ium trifluoroacetate **9p****

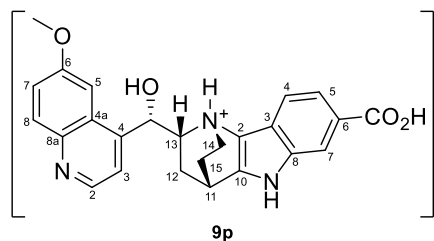

Prepared according to General Procedure B using ketone **5** and 10 mol% Pd(OAc)<sub>2</sub> (24 h). Purification by mass-directed preparative HPLC (MeCN in H<sub>2</sub>O + 0.1% TFA; Rt = 6.0 min) gave the *title compound* **9p** (20 mg, 47 μmol, 11%) as a yellow solid. **<sup>1</sup>H NMR** (500 MHz, CD<sub>3</sub>OD, CO<sub>2</sub>H, NH<sup>+</sup>, NH and OH not observed): δ 8.83 (1H, d, *J* 5.2, quinoline 2-H), 8.24 (1H, s, indole 7-H), 8.11 (1H, d, *J* 9.3, quinoline 8-H), 7.82 (1H, d, *J* 5.2, quinoline 3-H), 7.78 (1H, dd, *J* 8.5, 1.3, indole 5-H), 7.67 (1H, dd, *J* 9.3, 2.4, quinoline 7-H), 7.42 (1H, d, *J* 2.4, quinoline 5-H), 7.30 (1H, d, *J* 8.4, indole 4-H), 5.52 (1H, d, *J* 5.5, CH(OH)), 4.61-4.55 (1H, m, 13-H), 4.01-3.92 (1H, m, 14-H<sub>A</sub>), 3.87-3.83 (1H, m, 11-H), 3.78 (3H, s, OCH<sub>3</sub>), 3.18-3.09 (1H, m, 14-H<sub>B</sub>), 2.33-2.23 (2H, m, 12 H<sub>A</sub> and 15-H<sub>A</sub>), 2.13-2.06 (1H, m, 12-H<sub>B</sub>), 1.90-1.82 (1H, m, 15-H<sub>B</sub>). **<sup>13</sup>C NMR** (125 MHz, CD<sub>3</sub>OD, CF<sub>3</sub>CO<sub>2</sub><sup>-</sup> not observed): δ 170.5 (CO<sub>2</sub>H), 162.9 (q, *J*<sub>CF</sub> 33.4, CF<sub>3</sub>CO<sub>2</sub><sup>-</sup>), 162.8 (Ar-C<sub>q</sub>), 161.0 (quinoline 6-C), 145.0 (quinoline 2-C), 143.3 (Ar-C<sub>q</sub>), 140.0 (Ar-C<sub>q</sub>), 135.1 (Ar-C<sub>q</sub>), 131.0 (Ar-C<sub>q</sub>), 128.9 (Ar-C<sub>q</sub>), 127.7 (quinoline 8-C), 126.6 (quinoline 7-C), 125.2 (Ar-C<sub>q</sub>), 123.4 (Ar-C<sub>q</sub>), 123.1 (indole 5-C), 121.8 (quinoline 3-C), 116.8 (indole 4-C), 115.9 (indole 7-C), 103.2 (quinoline 5-C), 70.0 (CH(OH)), 67.7 (13-C), 57.1 (14-C), 56.5 (OCH<sub>3</sub>), 30.1 (12-C), 28.7 (11-C), 25.3 (15-C). **HRMS** (ESI): C<sub>25</sub>H<sub>24</sub>O<sub>4</sub>N<sub>3</sub> [M+H]<sup>+</sup>; calculated: 430.1761, found: 430.1765. [α]<sub>20</sub><sup>D</sup> = +73 (c. 0.1, MeOH).

Prepared according to General Procedure B using ketone **5** and 10 mol% Pd(OAc)<sub>2</sub> (24 h). Purification by mass-directed preparative HPLC (MeCN in H<sub>2</sub>O + 0.1% TFA; Rt = 6.0 min) gave the *title compound* **9p** (20 mg, 47 μmol, 11%) as a yellow solid. **<sup>1</sup>H NMR** (500 MHz, CD<sub>3</sub>OD, CO<sub>2</sub>H, NH<sup>+</sup>, NH and OH not observed): δ 8.83 (1H, d, *J* 5.2, quinoline 2-H), 8.24 (1H, s, indole 7-H), 8.11 (1H, d, *J* 9.3, quinoline 8-H), 7.82 (1H, d, *J* 5.2, quinoline 3-H), 7.78 (1H, dd, *J* 8.5, 1.3, indole 5-H), 7.67 (1H, dd, *J* 9.3, 2.4, quinoline 7-H), 7.42 (1H, d, *J* 2.4, quinoline 5-H), 7.30 (1H, d, *J* 8.4, indole 4-H), 5.52 (1H, d, *J* 5.5, CH(OH)), 4.61-4.55 (1H, m, 13-H), 4.01-3.92 (1H, m, 14-H<sub>A</sub>), 3.87-3.83 (1H, m, 11-H), 3.78 (3H, s, OCH<sub>3</sub>), 3.18-3.09 (1H, m, 14-H<sub>B</sub>), 2.33-2.23 (2H, m, 12 H<sub>A</sub> and 15-H<sub>A</sub>), 2.13-2.06 (1H, m, 12-H<sub>B</sub>), 1.90-1.82 (1H, m, 15-H<sub>B</sub>). **<sup>13</sup>C NMR** (125 MHz, CD<sub>3</sub>OD, CF<sub>3</sub>CO<sub>2</sub><sup>-</sup> not observed): δ 170.5 (CO<sub>2</sub>H), 162.9 (q, *J*<sub>CF</sub> 33.4, CF<sub>3</sub>CO<sub>2</sub><sup>-</sup>), 162.8 (Ar-C<sub>q</sub>), 161.0 (quinoline 6-C), 145.0 (quinoline 2-C), 143.3 (Ar-C<sub>q</sub>), 140.0 (Ar-C<sub>q</sub>), 135.1 (Ar-C<sub>q</sub>), 131.0 (Ar-C<sub>q</sub>), 128.9 (Ar-C<sub>q</sub>), 127.7 (quinoline 8-C), 126.6 (quinoline 7-C), 125.2 (Ar-C<sub>q</sub>), 123.4 (Ar-C<sub>q</sub>), 123.1 (indole 5-C), 121.8 (quinoline 3-C), 116.8 (indole 4-C), 115.9 (indole 7-C), 103.2 (quinoline 5-C), 70.0 (CH(OH)), 67.7 (13-C), 57.1 (14-C), 56.5 (OCH<sub>3</sub>), 30.1 (12-C), 28.7 (11-C), 25.3 (15-C). **HRMS** (ESI): C<sub>25</sub>H<sub>24</sub>O<sub>4</sub>N<sub>3</sub> [M+H]<sup>+</sup>; calculated: 430.1761, found: 430.1765. [α]<sub>20</sub><sup>D</sup> = +73 (c. 0.1, MeOH).



**Methyl (11*S*,13*R*)-13-[(*S*)-hydroxy(6-methoxyquinolin-4-yl)methyl]-1,9-diazatetracyclo[9.2.2.0<sup>2,10</sup>.0<sup>3,8</sup>]pentadeca-2(10),3(8),4,6-tetraene-6-carboxylate **9q****

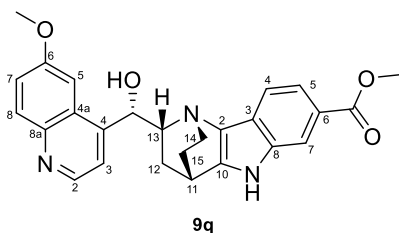

Prepared according to General Procedure B using ketone **5** and 30 mol% Pd(OAc)<sub>2</sub> (72 h). Flash column chromatography eluting with 1:9 to 1:4 ({50:80:1 CH<sub>2</sub>Cl<sub>2</sub>:EtOH:NH<sub>4</sub>OH}/CH<sub>2</sub>Cl<sub>2</sub>) gave the *title compound* **9q** (11 mg, 24 μmol, 7%) as a yellow solid.

**<sup>1</sup>H NMR** (500 MHz, CD<sub>3</sub>OD, NH and OH not observed): δ 8.72 (1H, d, *J* 4.6, quinoline 2-H), 8.13 (1H, d, *J* 1.4, indole 7-H), 7.98 (1H, d, *J* 9.2, quinoline 8-H), 7.55 (1H, dd, *J* 8.4, 1.4, indole 5-H), 7.52 (1H, d, *J* 4.6, quinoline 3-H), 7.40 (1H, dd, *J* 9.2, 2.7, quinoline 7-H), 7.18 (1H, d, *J* 2.7, quinoline 5-H), 6.83 (1H, d, *J* 8.3, indole 4-H), 4.55 (1H, d, *J* 8.7, CH(OH)), 3.97-3.93 (1H, m, 13-H), 3.92 (3H, s, ArOCH<sub>3</sub>), 3.56-3.53 (1H, m, 11-H), 3.47-3.45 (3H, s, CO<sub>2</sub>CH<sub>3</sub>), 3.25-3.18 (1H, m, 14-H<sub>A</sub>), 2.52-2.44 (1H, m, 14-H<sub>B</sub>), 2.33-2.27 (1H, m, 12-H<sub>A</sub>), 2.03-1.97 (1H, m, 15-H<sub>A</sub>), 1.92-1.86 (1H, m, 12-H<sub>B</sub>), 1.57-1.50 (1H, m, 15-H<sub>B</sub>). **<sup>13</sup>C NMR** (125 MHz, CD<sub>3</sub>OD): δ 170.1 (CO<sub>2</sub>CH<sub>3</sub>), 159.0 (quinoline 6-C), 150.2 (Ar-C<sub>q</sub>), 148.2 (Ar-C<sub>q</sub>), 147.7 (quinoline 2-C), 145.2 (Ar-C<sub>q</sub>), 135.1 (Ar-C<sub>q</sub>), 131.1 (quinoline 8-H), 129.1 (Ar-C<sub>q</sub>), 127.5 (Ar-C<sub>q</sub>), 123.5 (quinoline 7-C), 123.2 (Ar-C<sub>q</sub>), 122.3 (Ar-C<sub>q</sub>), 121.4 (indole 5-H or quinoline 3-H), 121.4 (indole 5-H or quinoline 3-H), 117.0 (indole 4-C), 115.1 (indole 7-C), 103.4 (quinoline 5-C), 74.0 (CH(OH)), 66.2 (13-C), 55.6 (ArOCH<sub>3</sub>), 54.2 (14-C), 52.3 (CO<sub>2</sub>CH<sub>3</sub>), 34.9 (12-C), 29.4 (11-C), 28.7 (15-C). **HRMS** (ESI): C<sub>26</sub>H<sub>26</sub>O<sub>4</sub>N<sub>3</sub> [M+H]<sup>+</sup>; calculated: 444.1918, found: 444.1917. [α]<sub>D</sub><sup>20</sup> = +94 (c. 0.1, MeOH).

**(S)-(6-Methoxyquinolin-4-yl)[(11S,13R)-6-(trifluoromethyl)-1,9-diazatetracyclo[9.2.2.0<sup>2,10</sup>.0<sup>3,8</sup>]pentadeca-2(10),3(8),4,6-tetraen-13-yl]methanol 9r**

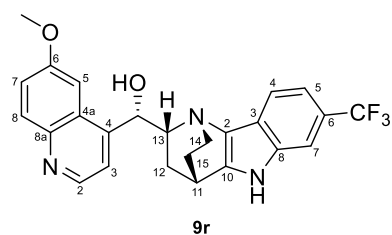

Prepared according to General Procedure B using ketone **5** and 20 mol% Pd(OAc)<sub>2</sub> (48 h). Flash column chromatography eluting with 1:9 to 1:4 ({50:80:1 CH<sub>2</sub>Cl<sub>2</sub>:EtOH:NH<sub>4</sub>OH}/CH<sub>2</sub>Cl<sub>2</sub>) gave the *title compound 9r* (34 mg, 76 μmol, 25%) as a yellow solid.

**<sup>1</sup>H NMR** (500 MHz, CD<sub>3</sub>OD, NH and OH not observed): δ 8.74 (1H, d, *J* 4.7, quinoline 2-H), 7.99 (1H, d, *J* 9.3, quinoline 8-H), 7.70 (1H, s, indole 7-H), 7.56 (1H, d, *J* 4.7, quinoline 3-H), 7.41 (1H, dd, *J* 9.3, 2.6, quinoline 7-H), 7.10-7.05 (2H, m, quinoline 5-H and indole 5-H), 6.84 (1H, d, *J* 8.4, indole 4-H), 4.53 (1H, d, *J* 8.9, CH(OH)), 3.98-3.90 (1H, m, 13-H), 3.58-3.53 (1H, m, 11-H), 3.39 (3H, s, OCH<sub>3</sub>), 3.27-3.18 (1H, m, 14-H<sub>A</sub>), 2.53-2.43 (1H, m, 14-H<sub>B</sub>), 2.36-2.28 (1H, m, 12-H<sub>A</sub>), 2.04-1.97 (1H, m, 15-H<sub>A</sub>), 1.93-1.86 (1H, m, 12-H<sub>B</sub>), 1.58-1.49 (1H, m, 15-H<sub>B</sub>). **<sup>13</sup>C NMR** (125 MHz, CD<sub>3</sub>OD): δ 159.0 (quinoline 6-C), 150.3 (Ar-C<sub>q</sub>), 148.3 (quinoline 2-C), 146.6 (Ar-C<sub>q</sub>), 145.2 (Ar-C<sub>q</sub>), 134.6 (Ar-C<sub>q</sub>), 131.1 (quinoline 8-C), 129.1 (Ar-C<sub>q</sub>), 127.0 (q, *J*<sub>CF</sub> 270.5, CF<sub>3</sub>), 126.2 (Ar-C<sub>q</sub>), 123.6 (quinoline 7-C), 122.8 (Ar-C<sub>q</sub>), 122.7 (q, *J*<sub>CF</sub> 31.2, indole 6-C), 121.3 (quinoline 3-C), 117.9 (indole 4-C), 116.6 (q, *J*<sub>CF</sub> 3.5, indole 5-C), 110.0 (q, *J*<sub>CF</sub> 4.3, indole 7-C), 103.2 (quinoline 5-C), 73.7 (CH(OH)), 66.3 (13-C), 55.5 (OCH<sub>3</sub>), 54.2 (14-C), 35.1 (12-C), 29.3 (11-C), 28.8 (15-C). **HRMS** (ESI): C<sub>25</sub>H<sub>23</sub>O<sub>2</sub>N<sub>3</sub>F [M+H]<sup>+</sup>; calculated: 454.1737, found: 454.1737. [α]<sub>20</sub><sup>D</sup> = +129 (c. 0.1, MeOH).

**(S)-[*(11S,13R)*-6-Chloro-1,9-diazatetracyclo[9.2.2.0<sup>2,10</sup>.0<sup>3,8</sup>]pentadeca-2(10),3(8),4,6-tetraen-13-yl](6-methoxyquinolin-4-yl)methanol **9s****

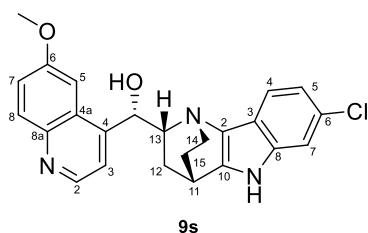

Prepared according to General Procedure B using ketone **5** and 20 mol% Pd(OAc)<sub>2</sub> (48 h). Flash column chromatography eluting with 5-20% {50:80:1 CH<sub>2</sub>Cl<sub>2</sub>:EtOH:NH<sub>4</sub>OH} in CH<sub>2</sub>Cl<sub>2</sub> gave the *title compound* **9s** (35 mg, 83 μmol, 26%) as a pale brown solid.

**<sup>1</sup>H NMR** (700 MHz, CD<sub>3</sub>OD, NH and OH not observed): δ 8.72 (1H, d, *J* 4.5, quinoline 2-H), 7.98 (1H, d, *J* 9.2, quinoline 8-H), 7.53 (1H, d, *J* 4.5, quinoline 3-H), 7.40 (1H, dd, *J* 9.2, 2.6, quinoline 7-H), 7.40 (1H, d, *J* 1.8, 7-H), 7.14 (1H, s, quinoline 5-H), 6.81 (1H, dd, *J* 8.4, 1.8, 5-H), 6.69 (1H, d, *J* 8.4, 4-H), 4.53 (1H, d, *J* 8.9, CH(OH)), 3.96-3.86 (1H, m, 13-H), 3.52-3.49 (1H, m, 11-H), 3.48 (3H, s, OCH<sub>3</sub>), 3.22-3.14 (1H, m, 14-H<sub>A</sub>), 2.51-2.42 (1H, m, 14-H<sub>B</sub>), 2.33-2.23 (1H, m, 12-H<sub>A</sub>), 2.02-1.94 (1H, m, 15-H<sub>A</sub>), 1.91-1.83 (1H, m, 12-H<sub>B</sub>), 1.54-1.47 (1H, m, 15-H<sub>B</sub>). **<sup>13</sup>C NMR** (175 MHz, CD<sub>3</sub>OD): δ 159.0 (quinoline 6-C), 150.3 (Ar-C<sub>q</sub>), 148.3 (quinoline 2-C), 145.3 (Ar-C<sub>q</sub>), 144.0 (Ar-C<sub>q</sub>), 136.2 (Ar-C<sub>q</sub>), 131.1 (quinoline 8-C), 129.1 (Ar-C<sub>q</sub>), 126.7 (Ar-C<sub>q</sub>), 123.5 (quinoline 7-C), 122.8 (Ar-C<sub>q</sub>), 122.6 (Ar-C<sub>q</sub>), 121.4 (quinoline 3-C), 120.6 (5-C), 118.5 (4-C), 112.5 (7-C), 103.4 (quinoline 5-C), 73.9 (CH(OH)), 66.3 (13-C), 55.5 (OCH<sub>3</sub>), 54.2 (14-C), 35.1 (12-C), 29.2 (15-C), 28.9 (11-C). **HRMS** (ESI): C<sub>24</sub>H<sub>23</sub><sup>37</sup>ClN<sub>3</sub>O<sub>2</sub> [M+H]<sup>+</sup>; calculated: 422.1444, found: 422.1444. [α]<sub>D</sub><sup>20</sup> = +142 (c. 0.1, MeOH).

**(1*R*,11*S*,13*R*)-6-Bromo-13-[(*S*)-hydroxy(6-methoxyquinolin-4-yl)methyl]-1,9-diaza-tetracyclo[9.2.2.0<sup>2,10</sup>.0<sup>3,8</sup>]pentadeca-2(10),3(8),4,6-tetraen-1-ium trifluoroacetate **9t****

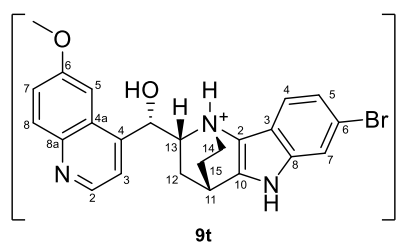

Prepared according to General Procedure B using ketone **5** and 30 mol% Pd(OAc)<sub>2</sub> (72 h). Flash column chromatography eluting with 1:9 to 1:4 ({50:80:1 CH<sub>2</sub>Cl<sub>2</sub>:EtOH:NH<sub>4</sub>OH}/CH<sub>2</sub>Cl<sub>2</sub>) followed by mass-directed preparative HPLC (MeCN in H<sub>2</sub>O + 0.1% TFA; Rt = 10.6 min) gave the *title compound* **9t** (16 mg,

27 μmol, 9%) as a yellow solid. **<sup>1</sup>H NMR** (600 MHz, CD<sub>3</sub>OD, NH<sup>+</sup>, NH and OH not observed): δ 8.89 (1H, d, *J* 5.3, quinoline 2-H), 8.15 (1H, d, *J* 9.4, quinoline 8-H), 7.92 (1H, d, *J* 5.3, quinoline 3-H), 7.73 (1H, dd, *J* 9.3, 2.6, quinoline 7-H), 7.68 (1H, d, *J* 1.3, indole 7-H), 7.47 (1H, d, *J* 2.6, quinoline 5-H), 7.23-7.16 (2 H, m, indole 4-H and indole 5-H), 5.62 (1H, d, *J* 5.5, CH(OH)), 4.61-4.55 (1H, m, 13-H), 4.00-3.92 (1H, m, 14-H<sub>A</sub>), 3.81 (4 H, s, OCH<sub>3</sub> and 11-H), 3.16-3.10 (1H, m, 14-H<sub>B</sub>), 2.29-2.18 (2 H, m, 12-H<sub>A</sub> and 15-H<sub>A</sub>), 2.13-2.05 (1H, m, 12-H<sub>B</sub>), 1.89-1.79 (1H, m, 15-H<sub>B</sub>). **<sup>13</sup>C NMR** (125 MHz, CD<sub>3</sub>OD, CF<sub>3</sub>CO<sub>2</sub><sup>-</sup> not observed): δ 162.61 (q, *J*<sub>CF</sub> 35.7, CF<sub>3</sub>CO<sub>2</sub><sup>-</sup>), 161.4 (quinoline 6-C), 154.1 (Ar-C<sub>q</sub>), 143.9 (quinoline 2-C), 140.4 (Ar-C<sub>q</sub>), 138.3 (Ar-C<sub>q</sub>), 136.5 (Ar-C<sub>q</sub>), 129.2 (Ar-C<sub>q</sub>), 127.7 (quinoline 7-C), 126.3 (quinoline 8-C), 124.9 (indole 4-C or indole 5-C), 122.0 (quinoline 3-C), 119.2 (indole 4-C or indole 5-C), 118.8 (Ar-C<sub>q</sub>), 116.3 (indole 7-C), 116.1 (Ar-C<sub>q</sub>), 113.5 (Ar-C<sub>q</sub>), 103.3 (quinoline 5-C), 69.7 (CH(OH)), 67.6 (13-C), 57.1 (14-C), 56.6 (OCH<sub>3</sub>), 30.1 (12-C), 28.6 (11-C), 25.2 (15-C). **HRMS** (ESI): C<sub>24</sub>H<sub>23</sub>O<sub>2</sub>N<sub>3</sub><sup>79</sup>Br [M+H]<sup>+</sup>; calculated: 464.0968, found: 464.0967; C<sub>24</sub>H<sub>23</sub>O<sub>2</sub>N<sub>3</sub><sup>81</sup>Br [M+H]<sup>+</sup>; calculated: 466.0948, found: 466.0946. [α]<sub>D</sub><sup>20</sup> = +69 (c. 0.1, MeOH).

**(1*R*,11*S*,13*R*)-13-[(*S*)-Hydroxy(6-methoxyquinolin-4-yl)methyl]-7-methoxy-1,9-diaza-tetracyclo[9.2.2.0<sup>2,10</sup>.0<sup>3,8</sup>]pentadeca-2(10),3(8),4,6-tetraen-1-ium trifluoroacetate **9u****

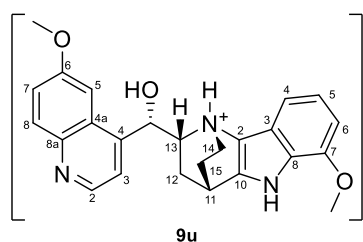

•CF<sub>3</sub>CO<sub>2</sub><sup>-</sup> Prepared according to General Procedure B using ketone **5** and 30 mol% Pd(OAc)<sub>2</sub> (72 h). Flash column chromatography eluting with 1:9 to 1:4 ({50:80:1 CH<sub>2</sub>Cl<sub>2</sub>:EtOH:NH<sub>4</sub>OH}/CH<sub>2</sub>Cl<sub>2</sub>) followed by mass-directed preparative HPLC (MeCN in H<sub>2</sub>O + 0.1% TFA; Rt = 9 min) gave the *title compound* **9u** (27 mg, 49 μmol, 16%)

as a yellow solid. **<sup>1</sup>H NMR** (500 MHz, CD<sub>3</sub>OD, NH<sup>+</sup>, NH and OH not observed): δ 8.85 (1H, d, *J* 5.3, quinoline 2-H), 8.13 (1H, d, *J* 9.3, quinoline 8-H), 7.88 (1H, d, *J* 5.3, quinoline 3-H), 7.69 (1H, dd, *J* 9.3, 2.5, quinoline 7-H), 7.42 (1H, d, *J* 2.5, quinoline 5-H), 7.01 (1H, t, *J* 7.9, indole 5-H), 6.77 (2H, d, *J* 7.9, indole 4-H and indole 6-H), 5.41 (1H, d, *J* 6.4, CH(OH)), 4.66-4.59 (1H, m, 13-H), 4.00 (3H, s, OCH<sub>3</sub>), 3.97-3.91 (1H, m, 14-H<sub>A</sub>), 3.83-3.80 (1H, m, 11-H), 3.74 (3 H, s, OCH<sub>3</sub>), 3.13-3.06 (1H, m, 14-H<sub>B</sub>), 2.41-2.35 (1H, m, 12-H<sub>A</sub>), 2.31-2.23 (1H, m, 15-H<sub>A</sub>), 2.13-2.06 (1H, m, 12-H<sub>B</sub>), 1.85-1.78 (1H, m, 15-H<sub>B</sub>). **<sup>13</sup>C NMR** (125 MHz, CD<sub>3</sub>OD, CF<sub>3</sub>CO<sub>2</sub><sup>-</sup> not observed): δ 162.5 (q, *J*<sub>CF</sub> 35.1, CF<sub>3</sub>CO<sub>2</sub><sup>-</sup>), 161.1 (quinoline 2-C), 152.7 (Ar-C<sub>q</sub>), 148.4 (Ar-C<sub>q</sub>), 144.4 (quinoline 2-C), 139.2 (Ar-C<sub>q</sub>), 138.9 (Ar-C<sub>q</sub>), 129.2 (Ar-C<sub>q</sub>), 127.2 (quinoline 7-C), 126.9 (quinoline 8-C), 125.9 (Ar-C<sub>q</sub>), 122.7 (indole 5-C), 122.3 (quinoline 3-C), 121.1 (Ar-C<sub>q</sub>), 113.1 (Ar-C<sub>q</sub>), 109.9 (indole 4-C or indole 6-C), 103.4 (quinoline 5-C), 103.4 (indole 4-C or indole 6-C), 70.3 (CH(OH)), 68.2 (13-C), 57.2 (14-C), 56.5 (OCH<sub>3</sub>), 56.0 (OCH<sub>3</sub>), 30.7 (12-C), 28.4 (11-C), 25.5 (15-C). **HRMS** (ESI): C<sub>25</sub>H<sub>26</sub>O<sub>3</sub>N<sub>3</sub> [M+H]<sup>+</sup>; calculated: 416.1969, found: 416.1967. [ $\alpha$ ]<sub>D</sub><sup>20</sup> = +98 (c. 0.1, MeOH).

### 6.3.2.2 Preparation of the quinidine-derived azaindoles

#### (1*R*,11*S*,13*R*)-13-[(*S*)-Hydroxy(6-methoxyquinolin-4-yl)methyl]-1,6,9-triazatetracyclo[9.2.2.0<sup>2,10</sup>.0<sup>3,8</sup>]pentadeca-2(10),3(8),4,6-tetraen-1-ium trifluoroacetate **9v**

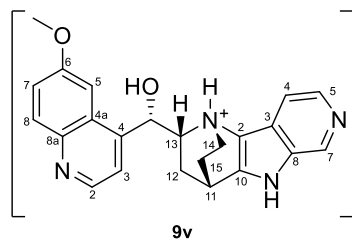

Prepared according to General Procedure B using ketone **5** and 20 mol% Pd(OAc)<sub>2</sub> (48 h). Purification by mass-directed preparative HPLC (MeCN in H<sub>2</sub>O + 0.1% TFA) gave the *title compound* **9v** (80 mg, 0.16 mmol, 50%) as a colourless solid.

**<sup>1</sup>H NMR** (700 MHz, CD<sub>3</sub>OD, NH<sup>+</sup> and OH not observed):

δ 9.05 (1H, s, 7-H), 8.95 (1H, d, *J* 5.5, quinoline 2-H), 8.20 (1H, d, *J* 9.2, quinoline 8-H), 8.13 (1H, d, *J* 6.5, 5-H), 7.92 (1H, d, *J* 5.5, quinoline 3-H), 7.78 (1H, dd, *J* 9.2, 2.6, quinoline 7-H), 7.60 (1H, d, *J* 2.6, quinoline 5-H), 7.54 (1H, d, *J* 6.5, 4-H), 5.26 (1H, d, *J* 5.9, CH(OH)), 4.11 (1H, app. dd, *J* 14.5, 6.2, 13-H), 3.87 (3H, s, OCH<sub>3</sub>), 3.82-3.79 (1H, m, 11-H), 3.57-3.52 (1H, m, 14-H<sub>A</sub>), 2.76-2.69 (1H, m, 14-H<sub>B</sub>), 2.27-2.22 (1H, m, 15-H<sub>A</sub>), 2.18-2.13 (1H, m, 12-H<sub>A</sub>), 2.02-1.97 (1H, m, 15-H<sub>B</sub>), 1.72-1.66 (1H, m, 12-H<sub>B</sub>). **<sup>13</sup>C NMR** (175 MHz, CD<sub>3</sub>OD): δ 162.6 (q, *J* 35.7, CF<sub>3</sub>CO<sub>2</sub><sup>-</sup>), 161.4 (quinoline 6-C), 158.9 (Ar-C<sub>q</sub>), 158.5 (Ar-C<sub>q</sub>), 143.1 (quinoline 2-C), 137.1 (Ar-C<sub>q</sub>), 131.1 (Ar-C<sub>q</sub>), 131.0 (Ar-C<sub>q</sub>), 129.8 (5-C or Ar-C<sub>q</sub>), 129.5 (5-C or Ar-C<sub>q</sub>), 128.2 (7-C), 127.9 (quinoline 7-C), 125.4 (quinoline 8-C), 123.5 (Ar-C<sub>q</sub>), 121.5 (quinoline 3-C), 117.9 (q, *J* 292, CF<sub>3</sub>CO<sub>2</sub><sup>-</sup>), 113.6 (4-C), 104.1 (quinoline 5-C), 72.4 (CH(OH)), 65.7 (13-C), 56.8 (OCH<sub>3</sub>), 54.6 (14-C), 31.9 (15-C), 29.9 (11-C), 26.8 (12-C). **HRMS** (ESI): C<sub>23</sub>H<sub>23</sub>N<sub>4</sub>O<sub>2</sub> [M+H]<sup>+</sup>; calculated: 387.1816, found: 387.1817. [α]<sub>D</sub><sup>20</sup> = +44 (c. 1.5, MeOH).

**(1*R*,11*S*,13*R*)-13-[(*S*)-Hydroxy(6-methoxyquinolin-4-yl)methyl]-1,7,9-triazatetracyclo[9.2.2.0<sup>2,10</sup>.0<sup>3,8</sup>]pentadeca-2(10),3(8),4,6-tetraen-1-ium trifluoroacetate **9w****

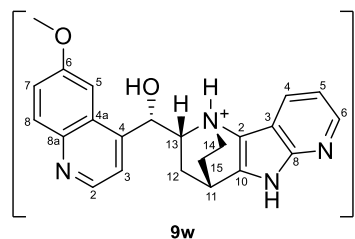

Prepared according to General Procedure B using ketone **5** and 20 mol% Pd(OAc)<sub>2</sub> (48 h). Purification by mass-directed preparative HPLC (MeCN in H<sub>2</sub>O + 0.1% TFA) gave the *title compound* **9w** (28 mg, 56 μmol, 17%) as a pale yellow solid.

**<sup>1</sup>H NMR** (700 MHz, CD<sub>3</sub>OD, NH<sup>+</sup> and OH not observed):

δ 8.91 (1H, d, *J* 5.4, quinoline 2-H), 8.30 (1H, d, *J* 3.9, 6-H), 8.18 (1H, d, *J* 9.2, quinoline 8-H), 7.95 (1H, d, *J* 5.4, quinoline 3-H), 7.91 (1H, d, *J* 7.9, 4-H), 7.78 (1H, dd, *J* 9.2, 2.5, quinoline 7-H), 7.65-7.58 (1H, m, quinoline 5-H), 7.25 (1H, dd, *J* 7.9, 4.9, 5-H), 5.83 (1H, br. s, CH(OH)), 4.55-4.50 (1H, m, 13-H), 4.13-4.08 (1H, m, OH), 4.00-3.94 (1H, m, 14-H<sub>A</sub>), 3.93 (3H, s, OCH<sub>3</sub>), 3.86-3.82 (1H, m, 11-H), 3.16 (1H, td, *J* 11.3, 5.5, 14-H<sub>B</sub>), 2.28-2.22 (1H, m, 15-H<sub>A</sub>), 2.20-2.13 (1H, m, 12-H<sub>A</sub>), 2.11-2.05 (1H, m, 12-H<sub>B</sub>), 1.92-1.85 (1H, m, 15-H<sub>B</sub>). **<sup>13</sup>C NMR** (125 MHz, CD<sub>3</sub>OD, 3 × Ar-C<sub>q</sub> not observed): δ 162.2 (q, *J* 36.4, CF<sub>3</sub>CO<sub>2</sub><sup>-</sup>), 161.7 (quinoline 6-C), 146.3 (Ar-C<sub>q</sub>), 143.5 (quinoline 2-C), 142.7 (6-C), 141.4 (Ar-C<sub>q</sub>), 129.2 (Ar-C<sub>q</sub>), 127.9 (quinoline 7-C), 127.2 (4-C), 125.9 (quinoline 8-C), 121.7 (quinoline 3-C), 118.0 (5-C), 117.8 (q, 288.7, CF<sub>3</sub>CO<sub>2</sub><sup>-</sup>), 103.4 (quinoline 5-C), 69.8 (CH(OH)), 67.1 (13-C), 56.9 (2 peaks, 14-C and OCH<sub>3</sub>), 29.9 (12-C), 28.5 (11-C), 25.2 (15-C). **HRMS** (ESI): C<sub>23</sub>H<sub>23</sub>N<sub>4</sub>O<sub>2</sub> [M+H]<sup>+</sup>; calculated: 387.1816, found: 387.1818. [α]<sub>20</sub><sup>D</sup> = +64 (c. 0.2, MeOH).

**(S)-(6-Methoxyquinolin-4-yl)[(11S,13R)-5-methyl-1,7,9-triazatetracyclo[9.2.2.0<sup>2,10</sup>.0<sup>3,8</sup>]pentadeca-2(10),3(8),4,6-tetraen-13-yl]methanol 9w-b**

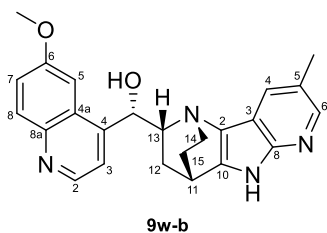

Prepared according to General Procedure B using ketone **5** and 30 mol% Pd(OAc)<sub>2</sub> (72 h). Flash column chromatography eluting with 5-35% {50:80:1 CH<sub>2</sub>Cl<sub>2</sub>:EtOH:NH<sub>4</sub>OH} in CH<sub>2</sub>Cl<sub>2</sub> gave the *title compound* **9w-b** (65 mg, 0.16 mmol, 51%) as a colourless solid. **<sup>1</sup>H NMR** (500 MHz, CD<sub>3</sub>OD, NH and OH not observed): δ 8.70 (1H, d, *J* 4.6, quinoline 2-H),

7.94 (1H, d, *J* 9.2, quinoline 8-H), 7.85 (1H, d, *J* 1.3, 6-C), 7.56 (1H, d, *J* 4.6, quinoline 3-H), 7.35 (1H, dd, *J* 9.2, 2.3, quinoline 7-H), 6.90 (1H, d, *J* 2.3, quinoline 5-H), 6.65 (1H, s, 4-H), 4.51 (1H, d, *J* 9.0, CH(OH)), 3.88-3.79 (1H, m, 13-H), 3.51-3.45 (1H, m, 11-H), 3.28 (3H, s, OCH<sub>3</sub>), 3.17-3.10 (1H, m, 14-H<sub>A</sub>), 2.39 (1H, ddd, *J* 12.3, 10.9, 5.1, 14-H<sub>B</sub>), 2.32-2.26 (1H, m, 15-H<sub>A</sub>), 2.17 (3H, s, Py-CH<sub>3</sub>), 1.97-1.90 (1H, m, 12-H<sub>A</sub>), 1.87-1.81 (1H, m, 15-H<sub>B</sub>), 1.52-1.43 (1H, m, 12-H<sub>B</sub>). **<sup>13</sup>C NMR** (125 MHz, CD<sub>3</sub>OD): δ 158.9 (quinoline 6-C), 150.6 (Ar-C<sub>q</sub>), 148.4 (quinoline 2-C), 145.9 (Ar-C<sub>q</sub>), 145.2 (Ar-C<sub>q</sub>), 144.9 (Ar-C<sub>q</sub>), 141.8 (6-C), 131.1 (quinoline 8-C), 129.1 (Ar-C<sub>q</sub>), 126.7 (4-C), 126.0 (Ar-C<sub>q</sub>), 123.6 (quinoline 7-C), 121.1 (quinoline 3-C), 120.7 (Ar-C<sub>q</sub>), 117.3 (Ar-C<sub>q</sub>), 103 (quinoline 5-C), 73.0 (CH(OH)), 66.7 (13-C), 55.4 (OCH<sub>3</sub>), 54.1 (14-C), 35.5 (15-C), 29.0 (11-C and 12-C), 18.4 (Py-CH<sub>3</sub>). **HRMS** (ESI): C<sub>24</sub>H<sub>25</sub>N<sub>4</sub>O<sub>2</sub> [M+H]<sup>+</sup>; calculated: 401.1972, found: 401.1965.  $[\alpha]_{20}^D = +353$  (c. 0.1, MeOH).



**(S)-[[(11S,13R)-5-Fluoro-1,9-diazatetracyclo[9.2.2.0<sup>2,10</sup>.0<sup>3,8</sup>]pentadeca-2(10),3(8),4,6-tetra-en-13-yl][(6-methoxyquinolin-4-yl)methanol 9w-f**

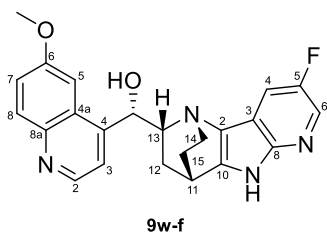

Prepared according to General Procedure B using ketone **5** and 30 mol% Pd(OAc)<sub>2</sub> (72 h). Flash column chromatography eluting with 1:9 to 1:3 ({50:80:1 CH<sub>2</sub>Cl<sub>2</sub>:EtOH:NH<sub>4</sub>OH}/CH<sub>2</sub>Cl<sub>2</sub>) gave the *title compound* **9w-f** (49 mg, 121 μmol, 38%) as yellow solid. <sup>1</sup>H NMR (500 MHz, CD<sub>3</sub>OD, NH and OH not observed): δ 8.73 (1H, d, *J* 4.6, quinoline 2-H), 8.05-7.97 (2H,

m, quinoline 8-H and indole 6-H), 7.54 (1H, d, *J* 4.6, quinoline 3-H), 7.43 (1H, dd, *J* 9.2, 2.7, quinoline 7-H), 7.16 (1H, d, *J* 2.7, quinoline 5-H), 6.85 (1H, dd, *J* 9.3, 2.7, indole 4-H), 4.65 (1H, d, *J* 8.2, CH(OH)), 3.93-3.86 (1H, m, 13-H), 3.59 (3H, s, OCH<sub>3</sub>), 3.56-3.48 (1H, m, 11-H), 3.27-3.18 (1H, m, 14-H<sub>A</sub>), 2.53-2.45 (1H, m, 14-H<sub>B</sub>), 2.31-2.24 (1H, m, 12-H<sub>A</sub>), 2.05-1.96 (1H, m, 15-H<sub>A</sub>), 1.94-1.88 (1H, m, 12-H<sub>B</sub>), 1.64-1.50 (1H, m, 15-H<sub>B</sub>). <sup>13</sup>C NMR (125 MHz, CD<sub>3</sub>OD): δ 159.1 (quinolone 6-C), 157.0 (d, *J*<sub>CF</sub> 240.1, indole 5-C), 150.3 (Ar-C<sub>q</sub>), 148.3 (quinoline 2-C), 147.6 (Ar-C<sub>q</sub>), 145.1 (Ar-C<sub>q</sub>), 144.4 (Ar-C<sub>q</sub>), 131.2 (quinoline 8-C), 129.2 (d, *J*<sub>CF</sub> 30.4, indole 6-C), 128.9 (Ar-C<sub>q</sub>), 123.3 (quinoline 7-C), 121.4 (d, *J*<sub>CF</sub> 4.0, indole 8-C), 121.2 (quinoline 3-C), 117.4 (d, *J*<sub>CF</sub> 7.0, indole 3-C), 111.6 (d, *J*<sub>CF</sub> 21.9, indole 4-C), 103.3 (quinoline 5-C), 73.6 (CH(OH)), 66.2 (13-C), 55.7 (OCH<sub>3</sub>), 54.3 (14-C), 34.8 (12-C), 29.1 (11-C), 28.7 (15-C). **HRMS** (ESI): C<sub>23</sub>H<sub>22</sub>O<sub>2</sub>N<sub>4</sub>F [M+H]<sup>+</sup>; calculated: 405.1721, found: 405.1721. [α]<sub>20</sub><sup>D</sup> = +168 (c. 0.1, MeOH).

**(1*R*,11*S*,13*R*)-13-[(*S*)-Hydroxy(6-methoxyquinolin-4-yl)methyl]-6-methyl-1,7,9-triaza-tetracyclo[9.2.2.0<sup>2,10</sup>.0<sup>3,8</sup>]pentadeca-2(10),3(8),4,6-tetraen-1-ium trifluoroacetate **9w-k****

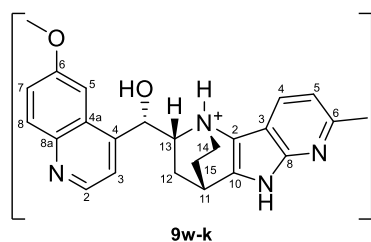

Prepared according to General Procedure B using ketone **5** and 30 mol% Pd(OAc)<sub>2</sub> (72 h). Flash column chromatography eluting with 1:9 to 1:4 ({50:80:1 CH<sub>2</sub>Cl<sub>2</sub>:EtOH:NH<sub>4</sub>OH}/CH<sub>2</sub>Cl<sub>2</sub>) followed by mass-directed preparative HPLC (MeCN in H<sub>2</sub>O + 0.1% TFA; Rt = 6 min) gave the *title compound* **9w-k** (21 mg, 42 μmol, 13%)

as yellow solid. **<sup>1</sup>H NMR** (500 MHz, CD<sub>3</sub>OD, NH<sup>+</sup>, NH and OH not observed): δ 8.90 (1H, d, *J* 5.4, quinoline 2-H), 8.16 (1H, d, *J* 9.3, quinoline 8-H), 7.93 (1H, d, *J* 5.4, quinoline 3-H), 7.83 (1H, d, *J* 8.1, indole 4-H), 7.76 (1H, dd, *J* 9.3, 2.4, quinoline 7-H), 7.59 (1H, d, *J* 2.4, quinoline 5-H), 7.16 (1H, d, *J* 8.1, indole 5-H), 5.78 (1H, d, *J* 4.4 CH(OH)), 4.52-4.45 (1H, m, 13-H), 3.95-3.92 (1H, m, 14-H<sub>A</sub>), 3.91 (3H, s, OCH<sub>3</sub>), 3.83-3.79 (1H, m, 11-H), 3.14-3.08 (1H, m, 14-H<sub>B</sub>), 2.67 (3H, s, Py-CH<sub>3</sub>), 2.26-2.18 (1H, m, 15-H<sub>A</sub>), 2.17-2.11 (1H, m, 12-H<sub>A</sub>), 2.08-2.02 (1H, m, 12-H<sub>B</sub>), 1.88-1.81 (1H, m, 15-H<sub>B</sub>). **<sup>13</sup>C NMR** (125 MHz, CD<sub>3</sub>OD, CF<sub>3</sub>CO<sub>2</sub><sup>-</sup> not observed): δ 162.7 (d, *J*<sub>CF</sub> 36.3, CF<sub>3</sub>CO<sub>2</sub><sup>-</sup>), 161.6 (quinoline 6-C), 155.3 (Ar-C<sub>q</sub>), 151.6 (Ar-C<sub>q</sub>), 145.0 (Ar-C<sub>q</sub>), 143.5 (quinoline 2-H), 140.8 (Ar-C<sub>q</sub>), 137.6 (Ar-C<sub>q</sub>), 129.2 (Ar-C<sub>q</sub>), 128.6 (indole 4-C), 128.0 (quinoline 7-C), 125.9 (quinoline 8-C), 121.7 (quinoline 3-C), 118.1 (indole 5-C), 114.0 (Ar-C<sub>q</sub>), 113.1 (Ar-C<sub>q</sub>), 103.4 (quinoline 5-C), 69.8 (CH(OH)), 67.0 (13-C), 56.8 (OCH<sub>3</sub>), 56.6 (14-C), 30.0 (12-C), 28.5 (11-C), 25.4 (15-C), 23.0 (Py-CH<sub>3</sub>). **HRMS** (ESI): C<sub>24</sub>H<sub>25</sub>O<sub>2</sub>N<sub>4</sub> [M+H]<sup>+</sup>; calculated: 401.1972, found: 401.1972. [α]<sub>D</sub><sup>20</sup> = +52 (c. 0.1, MeOH).

### 6.3.2.3 Preparation of the quinine-derived indoles

#### (R)-[(11S,13S)-1,9-Diazatetracyclo[9.2.2.0<sup>2,10</sup>.0<sup>3,8</sup>]pentadeca-2(10),3(8),4,6-tetraen-13-yl] (6-methoxyquinolin-4-yl)methanol **10a**

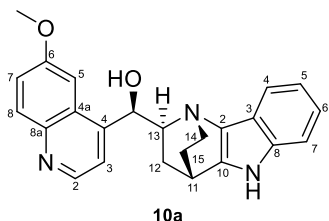

Prepared according to General Procedure B using ketone **6** and 10 mol% Pd(OAc)<sub>2</sub> (24 h). Flash column chromatography eluting with 1:9 to 1:4 ({50:80:1 CH<sub>2</sub>Cl<sub>2</sub>:EtOH:NH<sub>4</sub>OH}/CH<sub>2</sub>Cl<sub>2</sub>) gave the *title compound* **10a** (21 mg, 55 μmol, 17%) as a yellow solid. <sup>1</sup>H NMR (500 MHz, CD<sub>3</sub>OD, NH and OH not observed) δ 8.63 (1H, d, *J* 4.7, quinoline 2-H), 7.84 (1H, d, *J* 9.2, quinoline 8-H), 7.75 (1H, d, *J* 4.7, quinoline 3-H), 7.67-7.62 (1H, m, indole 4-H), 7.37 (1H, d, *J* 2.4 Hz, quinoline 5-H), 7.32-7.26 (2H, m, quinoline 7-H and indole 7-H), 7.05-6.98 (2H, m, indole 5-H and 6-H), 6.04 (1H, app. s, CH(OH)), 4.26 (1H, ddd, *J* 12.4, 8.9, 3.9 Hz 14-H<sub>A</sub>), 3.97 (3H, s, OCH<sub>3</sub>), 3.40 (1H, s, 11-H), 3.10-3.04 (1H, m, 13-H), 2.67 (1H, app. td, *J* 11.2, 4.2, 14-H<sub>B</sub>), 2.38-2.32 (1H, m, 12-H<sub>A</sub>), 2.21-2.13 (1H, m, 15-H<sub>A</sub>), 1.68-1.60 (1H, m 15-H<sub>B</sub>), 1.18-1.11 (1H, m, 12-H<sub>B</sub>). <sup>13</sup>C NMR (125 MHz, CD<sub>3</sub>OD) δ 159.7 (quinoline 6-C), 151.0 (Ar-C<sub>q</sub>), 148.1 (quinoline 2-C), 144.5 (Ar-C<sub>q</sub>), 142.2 (Ar-C<sub>q</sub>), 135.6 (Ar-C<sub>q</sub>), 131.2 (quinoline 8-C), 127.7 (Ar-C<sub>q</sub>), 127.2 (Ar-C<sub>q</sub>), 123.7 (quinoline 7-C), 122.0 (Ar-C<sub>q</sub>), 121.2 (indole 5-C or indole 6-C), 120.5 (indole 5-C or indole 6-C), 119.3 (quinoline 3-C), 116.7 (indole 4-C), 112.8 (indole 7-C), 101.8 (quinoline 5-C), 71.4 (CH(OH)), 67.1 (13-C), 56.6 (OCH<sub>3</sub>), 49.2<sup>§</sup> (14-C), 30.3 (15-C), 29.5 (11-C), 27.4 (12-C) ppm. HRMS (ESI): C<sub>24</sub>H<sub>24</sub>O<sub>2</sub>N<sub>3</sub> [M+H]<sup>+</sup>; calculated: 386.1863, found: 386.1863. [α]<sub>D</sub><sup>20</sup> = +76 (c. 0.1, MeOH).

<sup>§</sup> Inferred from HSQC analysis.

**(R)-(6-Methoxyquinolin-4-yl)[(11S,13S)-4-methyl-1,9-diazatetracyclo[9.2.2.0<sup>2,10</sup>.0<sup>3,8</sup>]pentadeca-2(10),3(8),4,6-tetraen-13-yl]methanol 10b**

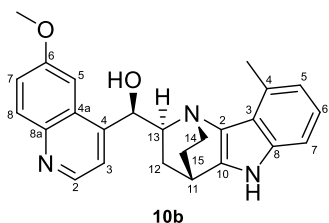

Prepared according to General Procedure B using ketone **6** and 20 mol% Pd(OAc)<sub>2</sub> (48 h). Flash column chromatography eluting with 1:9 to 1:4 ({50:80:1 CH<sub>2</sub>Cl<sub>2</sub>:EtOH:NH<sub>4</sub>OH}/CH<sub>2</sub>Cl<sub>2</sub>) gave the *title compound* **10b** (59 mg, 147 μmol, 46%) as a yellow solid. <sup>1</sup>H NMR (500 MHz, CD<sub>3</sub>OD, NH and OH not observed): δ 8.65 (1H, d, *J* 4.6, quinoline 2-H), 7.93 (1H, d, *J*

9.2, quinoline 8-H), 7.71 (1H, d, *J* 4.6, quinoline 3-H), 7.63 (1H, d, *J* 2.6, quinoline 5-H), 7.38 (1H, dd, *J* 9.2, 2.6, quinoline 7-H), 7.08 (1H, d, *J* 8.1, indole 7-H), 6.82 (1H, app. t, *J* 7.6, indole 6-H), 6.62 (1H, d, *J* 7.1, indole 5-H), 5.71 (1H, d, *J* 6.5, CH(OH)), 3.92 (3H, s, OCH<sub>3</sub>), 3.78-3.69 (1H, m, 14-H<sub>A</sub>), 3.39-3.35 (1H, m, 11-H), 3.21-3.15 (1H, m, 13-H), 2.47-2.40 (1H, m, 14-H<sub>B</sub>), 2.25 (3H, s, ArCH<sub>3</sub>), 2.18-2.11 (1H, m, 12-H<sub>A</sub>), 2.11-2.03 (1H, m, 15-H<sub>A</sub>), 1.69-1.62 (1H, m, 12-H<sub>B</sub>), 1.57-1.51 (1H, m, 15-H<sub>B</sub>). <sup>13</sup>C NMR (125 MHz, CD<sub>3</sub>OD): δ 159.3 (quinoline 6-C), 151.6 (Ar-C<sub>q</sub>), 148.1 (quinoline 2-C), 144.9 (Ar-C<sub>q</sub>), 142.1 (Ar-C<sub>q</sub>), 135.3 (Ar-C<sub>q</sub>), 131.1 (quinoline 8-C), 130.3 (Ar-C<sub>q</sub>), 128.9 (Ar-C<sub>q</sub>), 128.8 (Ar-C<sub>q</sub>), 123.0 (quinoline 7-C), 122.0 (Ar-C<sub>q</sub>), 120.8 (indole 5-C), 120.7 (indole 6-C), 120.6 (quinoline 3-C), 110.0 (indole 7-C), 103.4 (quinoline 5-C), 73.5 (CH(OH)), 67.7 (13-C), 56.2 (OCH<sub>3</sub>), 47.2 (14-C), 31.7 (12-C), 31.2 (15-C), 29.5 (11-C), 18.7 (CH<sub>3</sub>). HRMS (ESI): C<sub>25</sub>H<sub>26</sub>O<sub>2</sub>N<sub>3</sub> [M+H]<sup>+</sup>; calculated: 400.2020, found: 400.2020. [α]<sub>20</sub><sup>D</sup> = +48 (c. 0.1, MeOH).

**Methyl (11S,13S)-13-[(R)-hydroxy(6-methoxyquinolin-4-yl)methyl]-1,9-diazatetracyclo  
[9.2.2.0<sup>2,10</sup>.0<sup>3,8</sup>]pentadeca-2(10),3(8),4,6-tetraene-4-carboxylate 10c**

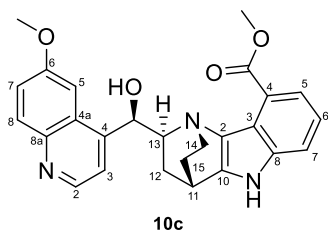

Prepared according to General Procedure B using ketone **6** and 30 mol% Pd(OAc)<sub>2</sub> (72 h). Flash column chromatography eluting with 1:9 to 1:4 ({50:80:1 CH<sub>2</sub>Cl<sub>2</sub>:EtOH:NH<sub>4</sub>OH}/CH<sub>2</sub>Cl<sub>2</sub>) gave the *title compound* **10c** (17 mg, 38 μmol, 12%) as a yellow solid. <sup>1</sup>H NMR (500 MHz, CD<sub>3</sub>OD, NH and OH not observed): δ 8.64 (1H, d, *J* 4.6, quinoline 2-H), 8.06 (1H, app.

s, indole 5-H), 7.86 (1H, d, *J* 9.2, quinoline 8-H), 7.76 (1H, d, *J* 4.6, quinoline 3-H), 7.72 (1H, dd, *J* 8.4, 1.4, indole 6-H), 7.67 (1H, d, *J* 8.4, indole 7-H), 7.39 (1H, d, *J* 2.7, quinoline 5-H), 7.31 (1H, dd, *J* 9.2, 2.7, quinoline 7-H), 6.02 (1H, s, CH(OH)), 4.28-4.22 (1H, m, 14-H<sub>A</sub>), 3.98 (3H, s, CO<sub>2</sub>CH<sub>3</sub> or OCH<sub>3</sub>), 3.88 (3H, s, CO<sub>2</sub>CH<sub>3</sub> or OCH<sub>3</sub>), 3.45 (1H, s, 11-H), 3.08-3.02 (1H, m, 13-H), 2.65 (1H, app. td, *J* 11.1, 4.0, 14-H<sub>B</sub>), 2.41-2.35 (1H, m, 12-H<sub>A</sub>), 2.24-2.17 (1H, m, 15-H<sub>A</sub>), 1.68-1.61 (1H, m, 12-H<sub>B</sub>), 1.22-1.15 (1H, m, 12-H<sub>B</sub>). <sup>13</sup>C NMR (125 MHz, CD<sub>3</sub>OD): δ 170.0 (CO<sub>2</sub>CH<sub>3</sub>), 159.7 (quinolone 6-C), 151.0 (quinoline 2-C), 148.2 (Ar-C<sub>q</sub>), 147.4 (Ar-C<sub>q</sub>), 144.6 (Ar-C<sub>q</sub>), 134.7 (Ar-C<sub>q</sub>), 131.3 (quinoline 8-C), 128.3 (Ar-C<sub>q</sub>), 127.8 (Ar-C<sub>q</sub>), 125.5 (Ar-C<sub>q</sub>), 123.6 (quinolone 7-C), 122.3 (Ar-C<sub>q</sub>), 121.8 (indole 6-C), 119.4 (quinoline 3-C), 116.1 (indole 7-C), 115.3 (indole 5-C), 101.9 (quinoline 5-C), 71.6 (CH(OH)), 66.8 (13-C), 56.6 (CO<sub>2</sub>CH<sub>3</sub> or OCH<sub>3</sub>), 52.3 (CO<sub>2</sub>CH<sub>3</sub> or OCH<sub>3</sub>), 48.4<sup>§</sup> (14-C), 30.2 (15-C), 29.7 (11-C), 27.4 (12-C). **HRMS** (ESI): C<sub>26</sub>H<sub>26</sub>O<sub>4</sub>N<sub>3</sub> [M+H]<sup>+</sup>; calculated: 444.1918, found: 444.1917. [α]<sub>20</sub><sup>D</sup> = +64 (c. 0.1, MeOH).

<sup>§</sup> Inferred from HSQC analysis.

**(R)-[[(11S,13S)-4-Chloro-1,9-diazatetracyclo[9.2.2.0<sup>2,10</sup>.0<sup>3,8</sup>]]pentadeca-2(10),3(8),4,6-tetra-en-13-yl](6-methoxyquinolin-4-yl)methanol 10d**

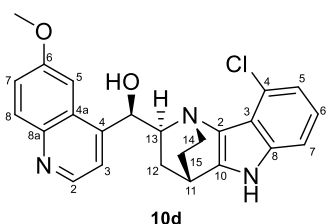

Prepared according to General Procedure B using ketone **6** and 10 mol% Pd(OAc)<sub>2</sub> (24 h). Flash column chromatography eluting with 1:9 to 1:4 ({50:80:1 CH<sub>2</sub>Cl<sub>2</sub>:EtOH:NH<sub>4</sub>OH}/CH<sub>2</sub>Cl<sub>2</sub>) gave the *title compound* **10d** (14 mg, 34 μmol, 10%) as a yellow solid. <sup>1</sup>H NMR (500 MHz, CD<sub>3</sub>OD, NH and OH not observed): δ 8.65 (1H, d, *J* 4.6, quinoline 2-H), 7.87 (1H, d, *J*

9.3, quinoline 8-H), 7.78-7.73 (2 H, m, quinoline 3-H, indole 6-H), 7.65-7.61 (1H, m, indole 5-H), 7.41 (1H, d, *J* 2.7, quinoline 5-C), 7.32 (1H, dd, *J* 9.3, 2.7, quinoline 7-H), 7.28 (1H, d, *J* 8.3, indole 7-H), 6.01 (1H, app. s, CH(OH)), 4.27-4.19 (1H, m, 14-H<sub>A</sub>), 3.98 (3 H, s, OCH<sub>3</sub>), 3.47-3.43 (1H, m, 11-H), 3.07-3.02 (1H, m, 13-H), 2.66-2.59 (1H, m, 14-H<sub>B</sub>), 2.41-2.35 (1H, m, 12-H<sub>A</sub>), 2.24-2.16 (1H, m, 15-H<sub>A</sub>), 1.68-1.60 (1H, m, 15-H<sub>B</sub>), 1.24-1.17 (1H, m, 12-H<sub>B</sub>). <sup>13</sup>C NMR (125 MHz, CD<sub>3</sub>OD): δ 159.7 (quinoline 6-C), 151.1 (Ar-C<sub>q</sub>), 148.2 (quinoline 2-C), 146.4 (Ar-C<sub>q</sub>), 144.6 (Ar-C<sub>q</sub>), 134.3 (Ar-C<sub>q</sub>), 131.3 (quinoline 8-C), 128.4 (Ar-C<sub>q</sub>), 127.8 (Ar-C<sub>q</sub>), 124.4 (Ar-C<sub>q</sub>), 123.6 (quinoline 7-C), 122.7 (Ar-C<sub>q</sub>), 119.4 (quinoline 3-C), 117.0 (indole 6-C), 117.0 (indole 7-C), 110.2 (indole 5-C), 102.0 (quinoline 5-C), 71.7 (CH(OH)), 66.8 (13-C), 56.6 (OCH<sub>3</sub>), 48.4 (14-C), 30.4 (15-C), 29.7 (11-C), 27.7 (12-C). HRMS (ESI): C<sub>24</sub>H<sub>23</sub>O<sub>2</sub>N<sub>3</sub><sup>35</sup>Cl [M+H]<sup>+</sup>; calculated: 420.1473, found: 420.1471. C<sub>24</sub>H<sub>23</sub>O<sub>2</sub>N<sub>3</sub><sup>37</sup>Cl [M+H]<sup>+</sup>; calculated: 422.1443, found: 422.1443. [α]<sub>20</sub><sup>D</sup> = +80 (c. 0.1, MeOH).

**(R)-(6-Methoxyquinolin-4-yl)[(11S,13S)-5-methyl-1,9-diazatetracyclo[9.2.2.0<sup>2,10</sup>.0<sup>3,8</sup>]pentadeca-2(10),3(8),4,6-tetraen-13-yl]methanol 10e**

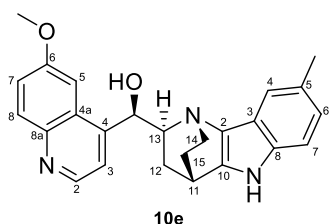

Prepared according to General Procedure B using ketone **6** and 10 mol% Pd(OAc)<sub>2</sub> (24 h). Flash column chromatography eluting with 1:9 to 1:4 ({50:80:1 CH<sub>2</sub>Cl<sub>2</sub>:EtOH:NH<sub>4</sub>OH}/CH<sub>2</sub>Cl<sub>2</sub>) gave the *title compound 10e* (21 mg, 53 μmol, 17%) as a yellow solid. <sup>1</sup>H NMR (500 MHz, CD<sub>3</sub>OD):

δ 8.65 (1H, d, *J* 4.6 Hz, quinoline 2-H), 7.87 (1H, d, *J* 9.3 Hz, quinolone 8-H), 7.76 (1H, d, *J* 4.7 Hz, quinoline 3-H), 7.44 (1H, s, indole 4-H), 7.39 (1H, d, *J* 2.6 Hz, quinoline 5-H), 7.32 (1H, dd, *J* 9.3, 2.6 Hz, quinoline 7-H), 7.19 (1H, d, *J* 8.2 Hz, indole 6-H or indole 7-H), 6.85 (1H, dd, *J* 8.2, 1.1 Hz, indole 6-H or indole 7-H), 6.03 (1H, app. s, CH(OH)), 4.29-4.22 (1H, m, 14-H<sub>A</sub>), 4.00 (3H, s, OCH<sub>3</sub>), 3.39 (1H, s, 11-H), 3.06 (1H, app. t, *J* 8.3, 13-H), 2.68 (1H, app. dt, *J* 4.2, 9.2 Hz, 14-H<sub>B</sub>), 2.41 (3H, s, CH<sub>3</sub>), 2.36-2.32 (1H, m, 12-H<sub>A</sub>), 2.21-2.14 (1H, m, 15-H<sub>A</sub>), 1.70-1.61 (1H, m, 15-H<sub>B</sub>), 1.13 (1H, t, *J* 11.1 Hz, 12-H<sub>B</sub>). <sup>13</sup>C NMR (125 MHz, CD<sub>3</sub>OD): δ 159.7 (quinoline 6-C), 151.1 (quinoline 4-C), 148.2 (quinoline 2-C), 144.6 (Ar-C<sub>q</sub>), 142.4 (Ar-C<sub>q</sub>), 134.0 (Ar-C<sub>q</sub>), 131.3 (quinoline 8-C), 129.6 (Ar-C<sub>q</sub>), 127.8 (Ar-C<sub>q</sub>), 123.9 (Ar-C<sub>q</sub>), 123.7 (quinolone 7-C), 122.7 (indole 6-C or indole 7-C), 122.3 (Ar-C<sub>q</sub>), 119.3 (quinoline 3-C), 116.4 (indole 4-C), 112.5 (indole 6-C or indole 7-C), 101.9 (quinoline 5-C), 71.5 (CH(OH)), 67.2 (13-C), 56.5 (OCH<sub>3</sub>), 48.5<sup>§</sup> (14-C), 30.4 (15-C), 29.5 (11-C), 27.4 (12-C), 21.7 (CH<sub>3</sub>). **HRMS** (ESI): C<sub>25</sub>H<sub>26</sub>O<sub>2</sub>N<sub>3</sub> [M+H]<sup>+</sup>; calculated: 400.2020, found: 400.2019. [α]<sub>20</sub><sup>D</sup> = +70 (c. 0.1, MeOH).

<sup>§</sup> Inferred from HSQC analysis.

**(1*R*,11*S*,13*S*)-5-Carboxy-13-[(*R*)-hydroxy(6-methoxyquinolin-4-yl)methyl]-1,9-diazatetracyclo[9.2.2.0<sup>2,10</sup>.0<sup>3,8</sup>]pentadeca-2(10),3(8),4,6-tetraen-1-ium trifluoroacetate 10f**

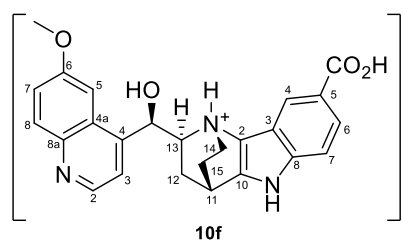

•CF<sub>3</sub>CO<sub>2</sub><sup>-</sup> Prepared according to General Procedure B using ketone **6** and 10 mol% Pd(OAc)<sub>2</sub> (24 h). Purification by mass-directed preparative HPLC (MeCN in H<sub>2</sub>O + 0.1% TFA) gave the *title compound 10f* (15 mg, 28 μmol, 9%) as a colourless solid.

**<sup>1</sup>H NMR** (500 MHz, CD<sub>3</sub>OD, CO<sub>2</sub>H, NH<sup>+</sup> and OH not observed): δ 8.91 (1H, d, *J* 5.3, quinoline 2-H), 8.19 (1H, d, *J* 5.3, quinoline 3-H), 8.17 (1H, s, 4-H), 8.05 (1H, d, *J* 9.3, quinoline 8-H), 7.87 (1H, d, *J* 8.5, 6-H), 7.84 (1H, d, *J* 8.5, 7-H), 7.68 (1H, d, *J* 2.2, quinoline 5-H), 7.62 (1H, dd, *J* 9.3, 2.2, quinoline 7-H), 6.63 (1H, app. s, CH(OH)), 4.88-4.81 (1H, m, 14-H<sub>A</sub>), 4.08 (3H, s, OCH<sub>3</sub>), 3.84-3.80 (1H, m, 11-H), 3.75 (1H, dd, *J* 10.0, 6.8, 13-H), 3.36-3.28 (1H, m, 14-H<sub>B</sub>), 2.71-2.63 (1H, m, 12-H<sub>A</sub>), 2.60-2.45 (1H, m, 15-H<sub>A</sub>) 2.04-1.95 (1H, m, 15-H<sub>B</sub>), 1.52-1.43 (1H, m, 12-H<sub>B</sub>). **<sup>13</sup>C NMR** (125 MHz, CD<sub>3</sub>OD, CF<sub>3</sub>CO<sub>2</sub><sup>-</sup> not observed): δ 170.4 (CO<sub>2</sub>H), 162.9 (dd, *J* 34.6, CF<sub>3</sub>CO<sub>2</sub><sup>-</sup>), 161.7 (quinoline 6-C), 154.6 (Ar-C<sub>q</sub>), 144.2 (quinolone 2-C), 143.7 (Ar-C<sub>q</sub>), 138.5 (Ar-C<sub>q</sub>), 134.9 (Ar-C<sub>q</sub>), 128.5 (Ar-C<sub>q</sub>), 127.4 (quinolone 7-C), 126.8 (quinoline 8-C), 125.4 (Ar-C<sub>q</sub>), 123.4 (6-C), 121.6 (Ar-C<sub>q</sub>), 120.5 (quinoline 3-C), 118.3 (Ar-C<sub>q</sub>), 116.5 (7-C), 116.1 (4-C), 102.3 (quinoline 5-C), 69.5 (13-C), 68.0 (CH(OH)), 57.3 (OCH<sub>3</sub>), 51.5 (14-C), 29.0 (11-C), 26.9 (15-C), 24.8 (12-C). **HRMS** (ESI): C<sub>25</sub>H<sub>24</sub>N<sub>3</sub>O<sub>4</sub> [M+H]<sup>+</sup>; calculated: 430.1761, found: 430.1759. [α]<sub>20</sub><sup>D</sup> = -4.0 (c. 0.1, MeOH).



**(R)-(6-Methoxyquinolin-4-yl)[(11S,13S)-5-(trifluoromethyl)-1,9-diazatetracyclo  
[9.2.2.0<sup>2,10</sup>.0<sup>3,8</sup>]pentadeca-2(10),3(8),4,6-tetraen-13-yl]methanol 10h**

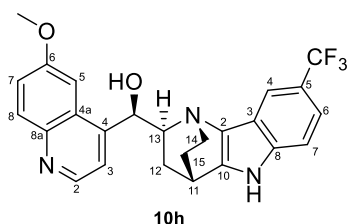

Prepared according to General Procedure B using ketone **6** and 30 mol% Pd(OAc)<sub>2</sub> (72 h). Flash column chromatography eluting with 1:9 to 1:4 ({50:80:1 CH<sub>2</sub>Cl<sub>2</sub>:EtOH:NH<sub>4</sub>OH}/CH<sub>2</sub>Cl<sub>2</sub>) gave the *title compound 10h* (34 mg, 75 μmol, 23%) as a yellow solid. <sup>1</sup>H NMR (500 MHz, CD<sub>3</sub>OD, NH and OH not observed): δ 8.64 (1H, d, *J* 4.7, quinoline 2-H), 8.00 (1H, s,

indole 4-H), 7.85 (1H, d, *J* 9.2, quinoline 8-H), 7.76 (1H, d, *J* 4.7, quinoline 3-H), 7.45 (1H, d, *J* 8.5, indole 7-H), 7.37 (1H, d, *J* 2.6, quinoline 5-H), 7.33-7.25 (2H, m, indole 6-H, quinoline 7-H), 6.02 (1H, app. s, CH(OH)), 4.29-4.22 (1H, m, 14-H<sub>A</sub>), 3.96 (3H, s, OCH<sub>3</sub>), 3.44 (1H, app. s, 11-H), 3.06-3.00 (1H, m, 13-H), 2.67 (1H, app. td, *J* 11.1, 3.7, 14-H<sub>B</sub>), 2.40-2.34 (1H, m, 12-H<sub>A</sub>), 2.23-2.16 (1H, m, 15-H<sub>A</sub>), 1.70-1.63 (1H, m, 15-H<sub>B</sub>), 1.17-1.10 (1H, m, 12-H<sub>B</sub>). <sup>13</sup>C NMR (125 MHz, CD<sub>3</sub>OD): δ 159.7 (quinoline 6-C), 151.1 (Ar-C<sub>q</sub>), 148.1 (quinoline 2-C), 145.2 (Ar-C<sub>q</sub>), 144.5 (Ar-C<sub>q</sub>), 136.9 (Ar-C<sub>q</sub>), 131.3 (quinoline 8-C), 127.2 (q, *J*<sub>CF</sub> 270.4, CF<sub>3</sub>), 128.7 (Ar-C<sub>q</sub>), 127.7 (Ar-C<sub>q</sub>), 123.8 (quinoline 7-C), 122.8 (q, *J*<sub>CF</sub> 31.3, indole 5-C), 121.6 (Ar-C<sub>q</sub>), 119.2 (quinoline 3-C), 117.5 (q, *J*<sub>CF</sub> 3.4, indole 6-C), 114.2 (q, *J*<sub>CF</sub> 4.3, indole 4-C), 113.2 (indole 7-C), 101.8 (quinoline 5-C), 71.7 (CH(OH)), 67.1 (13-C), 56.5 (OCH<sub>3</sub>), 48.3 (14-C), 30.5 (15-C), 29.7 (11-C), 27.3 (12-C). **HRMS** (ESI): C<sub>25</sub>H<sub>23</sub>O<sub>2</sub>N<sub>3</sub>F [M+H]<sup>+</sup>; calculated: 454.1737, found: 454.1733. [α]<sub>20</sub><sup>D</sup> = +94 (c. 0.1, MeOH).

**(1*R*,11*S*,13*S*)-13-[(*R*)-hydroxy(6-methoxyquinolin-4-yl)methyl]-5-nitro-1,9-diazatetracyclo[9.2.2.0<sup>2,10</sup>.0<sup>3,8</sup>]pentadeca-2(10),3(8),4,6-tetraen-1-ium trifluoroacetate 10i**

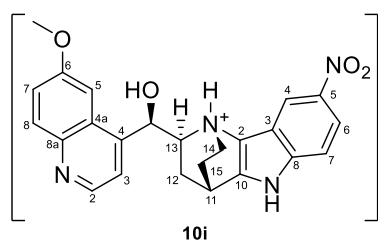

Prepared according to General Procedure B using ketone **6** and 30 mol% Pd(OAc)<sub>2</sub> (72 h). Flash column chromatography eluting with 1:9 to 1:4 ({50:80:1 CH<sub>2</sub>Cl<sub>2</sub>:EtOH:NH<sub>4</sub>OH}/CH<sub>2</sub>Cl<sub>2</sub>) followed by mass-directed preparative HPLC (MeCN in H<sub>2</sub>O + 0.1% TFA) gave the *title compound* **10i** (5 mg, 8 μmol, 3%) as

a yellow solid. **<sup>1</sup>H NMR** (500 MHz, CD<sub>3</sub>OD, NH<sup>+</sup>, NH and OH not observed): δ 8.90 (1H, d, *J* 5.3, quinoline 2-H), 8.83 (1H, d, *J* 2.2, indole 4-H), 8.17 (1H, d, *J* 5.3, quinoline 3-H), 8.09 (1H, dd, *J* 9.0, 2.2, indole 6-H), 8.04 (1H, d, *J* 9.3, quinoline 8-H), 7.71 (1H, d, *J* 2.4, quinoline 5-H), 7.61 (1H, dd, *J* 9.3, 2.4, quinoline 7-H), 7.58 (1H, d, *J* 9.0, indole 7-H), 6.63 (1H, app. s, CH(OH)), 4.85-4.79 (1H, m, 14-H<sub>A</sub>), 4.10 (3H, s, OCH<sub>3</sub>), 3.84-3.80 (1H, m, 11-H), 3.76-3.71 (1H, m, 13-H), 2.71-2.64 (1H, m, 12-H<sub>A</sub>), 2.54-2.47 (1H, m, 15-H<sub>A</sub>), 2.05-1.96 (1H, m, 15-H<sub>B</sub>), 1.50-1.43 (1H, m, 12-H<sub>B</sub>). **<sup>13</sup>C NMR** (125 MHz, CD<sub>3</sub>OD, CF<sub>3</sub>CO<sub>2</sub><sup>-</sup> not observed): δ 163.0 (q, *J*<sub>CF</sub> 30.9, CF<sub>3</sub>CO<sub>2</sub><sup>-</sup>), 161.6 (quinoline 6-C), 144.6 (Ar-C<sub>q</sub>), 144.3 (Ar-C<sub>q</sub>), 144.0 (quinoline 2-C), 143.1 (Ar-C<sub>q</sub>), 140.5 (Ar-C<sub>q</sub>), 138.7 (Ar-C<sub>q</sub>), 138.5 (Ar-C<sub>q</sub>), 128.4 (Ar-C<sub>q</sub>), 127.3 (quinoline 7-C), 126.9 (quinoline 8-C), 120.4 (quinoline 3-C), 118.2 (Ar-C<sub>q</sub>), 118.2 (indole 6-C), 114.2 (indole 4-C), 113.8 (indole 7-C), 102.43 (quinoline 5-C), 69.5 (13-C), 68.1 (CH(OH)), 57.4 (OCH<sub>3</sub>), 51.2 (14-C), 29.1 (11-C), 27.1 (15-C), 24.9 (12-C). **HRMS** (ESI): C<sub>24</sub>H<sub>23</sub>O<sub>4</sub>N<sub>4</sub> [M+H]<sup>+</sup>; calculated: 431.1714, found: 431.1709. [α]<sub>D</sub><sup>20</sup> = +52 (c. 0.1, MeOH).

**(R)-[[(11S,13S)-5-Methoxy-1,9-diazatetracyclo[9.2.2.0<sup>2,10</sup>.0<sup>3,8</sup>]]pentadeca-2(10),3(8),4,6-tetraen-13-yl](6-methoxyquinolin-4-yl)methanol 10j**

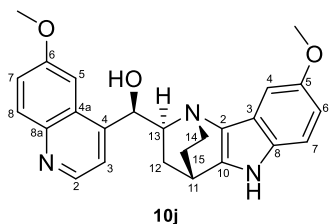

Prepared according to General Procedure B using ketone **6** and 30 mol% Pd(OAc)<sub>2</sub> (72 h). Flash column chromatography eluting with 1:9 to 1:3 ({50:80:1 CH<sub>2</sub>Cl<sub>2</sub>:EtOH:NH<sub>4</sub>OH}/CH<sub>2</sub>Cl<sub>2</sub>) gave the *title compound 10j* (8 mg, 20 μmol, 6%) as a yellow solid. <sup>1</sup>H NMR (600 MHz, CD<sub>3</sub>OD, NH and OH not observed): δ 8.64 (1H, d, *J* 4.7, quinoline 2-H), 7.87 (1H, d, *J* 9.2,

quinoline 8-H), 7.76 (1H, d, *J* 4.7, quinoline 3-H), 7.41 (1H, d, *J* 2.6, quinoline 5-H), 7.32 (1H, dd, *J* 9.2, 2.6, quinoline 7-H), 7.21-7.16 (2H, m, indole 4-H and indole 7-H), 6.66 (1H, dd, *J* 8.8, 2.4, indole 6-H), 6.01 (1H, app. s, CH(OH)), 4.26-4.20 (1H, m, 14-H<sub>A</sub>), 4.01 (3H, s, OCH<sub>3</sub>), 3.82 (3H, s, OCH<sub>3</sub>), 3.38-3.34 (1H, m, 11-H), 3.09-3.02 (1H, m, 13-H), 2.68-2.62 (1H, m, 14-H<sub>B</sub>), 2.37-2.31 (1H, m, 12-H<sub>A</sub>), 2.19-2.13 (1H, m, 15-H<sub>A</sub>), 1.66-1.60 (1H, m, 15-H<sub>B</sub>), 1.16-1.10 (1H, m, 12-H<sub>B</sub>). <sup>13</sup>C NMR (150 MHz, CD<sub>3</sub>OD): δ 159.6 (quinoline 6-C), 155.6 (indole 5-C), 151.3 (Ar-C<sub>q</sub>), 148.2 (quinoline 2-C), 144.6 (Ar-C<sub>q</sub>), 143.2 (Ar-C<sub>q</sub>), 131.3 (Ar-C<sub>q</sub>), 130.8 (quinoline 8-C), 127.9 (Ar-C<sub>q</sub>), 127.8 (Ar-C<sub>q</sub>), 123.7 (quinoline 7-C), 122.5 (Ar-C<sub>q</sub>), 119.3 (quinoline 3-C), 113.3 (indole 4-C or indole 7-C), 110.9 (indole 6-C), 102.0 (quinoline 5-C), 99.1 (indole 4-C or indole 7-C), 71.8 (CH(OH)), 67.0 (13-C), 56.7 (OCH<sub>3</sub>), 56.2 (OCH<sub>3</sub>), 48.5<sup>§</sup> (14-C), 30.5 (15-C), 29.6 (11-C), 27.6 (12-C). HRMS (ESI): C<sub>25</sub>H<sub>26</sub>O<sub>3</sub>N<sub>3</sub> [M+H]<sup>+</sup>; calculated: 416.1969, found: 416.1972. [α]<sub>20</sub><sup>D</sup> = -110 (c. 0.1, MeOH).

<sup>§</sup> Inferred from HSQC analysis.

**(R)-(6-methoxyquinolin-4-yl)[(11S,13S)-5-(trifluoromethoxy)-1,9-diazatetracyclo[9.2.2.0<sup>2,10</sup>.0<sup>3,8</sup>]pentadeca-2(10),3(8),4,6-tetraen-13-yl]methanol 10k**

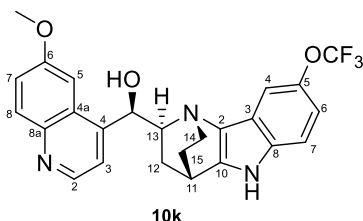

Prepared according to General Procedure B using ketone **6** and 10 mol% Pd(OAc)<sub>2</sub> (24 h). Flash column chromatography eluting with 5-20% {50:80:1 CH<sub>2</sub>Cl<sub>2</sub>:EtOH:NH<sub>4</sub>OH} in CH<sub>2</sub>Cl<sub>2</sub> gave the *title compound 10k* (98 mg, 0.21 mmol, 65%) as a pale brown solid.

**<sup>1</sup>H NMR** (400 MHz, CD<sub>3</sub>OD, NH and OH not observed): δ 8.56 (1H, d, *J* 4.7, quinoline 2-H), 7.73 (1H, d, *J* 9.2, quinoline 8-H), 7.69 (1H, d, *J* 4.7, quinoline 3-H), 7.53 (1H, d, *J* 1.1, indole 4-H), 7.30-7.26 (2H, m, quinoline 5-H and indole 7-H), 7.13 (1H, dd, *J* 9.2, 2.7, quinoline 7-H), 6.85 (1H, ddd, *J* 8.8, 2.3, 0.8, indole 6-H), 5.94 (1H, s, app. s, CH(OH)), 4.16 (1H, ddd, *J* 12.7, 8.8, 4.1, 14-H<sub>A</sub>), 3.88 (3H, s, OCH<sub>3</sub>), 3.33-3.27 (1H, m, 11-H), 3.01-2.94 (1H, m, 13-H), 2.59-2.50 (1H, m, 14-H<sub>B</sub>), 2.27 (1H, ddd, *J* 12.0, 6.6, 2.0, m, 12-H<sub>A</sub>), 2.12-2.03 (1H, m, 15-H<sub>A</sub>), 1.58-1.47 (1H, m, 15-H<sub>B</sub>), 1.11-1.02 (1H, m, 12-H<sub>B</sub>). **<sup>13</sup>C NMR** (175 MHz, CD<sub>3</sub>OD): δ 159.5 (quinolone 6-C), 151.1 (Ar-C<sub>q</sub>), 148.0 (quinoline 2-C), 145.3 (Ar-C<sub>q</sub>), 144.5 (Ar-C<sub>q</sub>), 144.4 (Ar-C<sub>q</sub>), 133.8 (Ar-C<sub>q</sub>), 131.2 (quinoline 8-C), 128.5 (Ar-C<sub>q</sub>), 127.6 (Ar-C<sub>q</sub>), 123.6 (quinolone 7-C), 122.3 (Ar-C<sub>q</sub>), 122.2 (q, *J*<sub>CF</sub> 253.5, CF<sub>3</sub>), 119.2 (quinoline 3-C), 114.5 (indole 6-C), 113.4 (indole 7-C), 109.0 (indole 4-C), 101.7 (quinoline 5-C), 71.7 (CH(OH)), 66.8 (13-C), 56.5 (OCH<sub>3</sub>), 48.4 (14-C), 30.4 (15-C), 29.6 (11-C), 27.4 (12-C). **HRMS** (ESI): C<sub>25</sub>H<sub>23</sub>O<sub>3</sub>N<sub>3</sub>F<sub>3</sub> [M+H]<sup>+</sup>; calculated: 470.1686, found: 470.1680. [α]<sub>20</sub><sup>D</sup> = +33 (c. 0.1, MeOH).

**(R)-[[(11S,13S)-5-Fluoro-1,9-diazatetracyclo[9.2.2.0<sup>2,10</sup>.0<sup>3,8</sup>]]pentadeca-2(10),3(8),4,6-tetraen-13-yl][(6-methoxyquinolin-4-yl)methanol 10I**

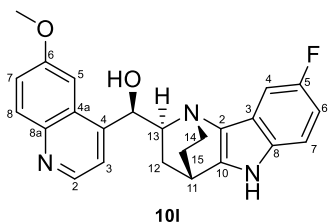

Prepared according to General Procedure B using ketone **6** and 20 mol% Pd(OAc)<sub>2</sub> (48 h). Flash column chromatography eluting with 1:9 to 1:4 ({50:80:1 CH<sub>2</sub>Cl<sub>2</sub>:EtOH:NH<sub>4</sub>OH}/CH<sub>2</sub>Cl<sub>2</sub>) gave the *title compound* **10I** as a yellow solid (61 mg, 151 μmol, 47%). <sup>1</sup>H NMR (500 MHz, CD<sub>3</sub>OD, NH and OH not observed): δ 8.65 (1H, d, *J* 4.7, quinoline 2-H), 7.86 (1H, d, *J* 9.2,

quinoline 8-H), 7.76 (1H, d, *J* 4.7, quinoline 3-H), 7.39 (1H, d, *J* 2.6, quinoline 5-H), 7.32 (1H, dd, *J* 2.6, 9.2, quinoline 7-H), 7.29 (1H, dd, *J* 9.9, 2.5, indole 4-H), 7.25 (1H, dd, *J* 8.9, 4.4, indole 7-H), 6.76 (1H, app. td, *J* 9.2, 2.5, indole 6-H), 6.00 (1H, app. s, CH(OH)), 4.26-4.19 (1H, m, 14-H<sub>A</sub>), 3.99 (3H, s, OCH<sub>3</sub>), 3.40-3.37 (1H, m, 11-H), 3.06-3.00 (1H, m, H-13), 2.64 (1H, app. td, *J* 11.5, 4.1, 14-H<sub>B</sub>), 2.37-2.32 (1H, m, 12-H<sub>A</sub>), 2.21-2.13 (1H, m, 15-H<sub>A</sub>), 1.67-1.59 (1H, m, 15-H<sub>B</sub>), 1.15 (1H, t, *J* 11.1, 12-H<sub>B</sub>). <sup>13</sup>C NMR (125 MHz, CD<sub>3</sub>OD): δ 159.7 (quinoline 6-C), 159.5 (d, *J*<sub>CF</sub> 232.6, indole 5-C), 151.2 (Ar-C<sub>q</sub>), 148.2 (quinoline 2-C), 144.8 (Ar-C<sub>q</sub>), 144.6 (Ar-C<sub>q</sub>), 132.2 (Ar-C<sub>q</sub>), 131.3 (quinoline 8-C), 127.8 (Ar-C<sub>q</sub>), 123.7 (quinoline 7-C), 122.4 (Ar-C<sub>q</sub>), 122.3 (Ar-C<sub>q</sub>), 119.3 (quinoline 3-C), 113.4 (d, *J*<sub>CF</sub> 9.9, indole 7-C), 108.8 (d, *J*<sub>CF</sub> 26.5, indole 6-C), 101.9 (quinolone 5-C), 101.5 (d, *J*<sub>CF</sub> 24.6, indole 4-C), 71.7 (CH(OH)), 66.9 (13-C), 56.6 (OCH<sub>3</sub>), 48.5<sup>§</sup> (14-C), 30.4 (15-C), 29.7 (11-C), 27.6 (12-C). HRMS (ESI): C<sub>24</sub>H<sub>23</sub>O<sub>2</sub>N<sub>3</sub>F [M+H]<sup>+</sup>; calculated: 404.1769, found: 404.1769. [α]<sub>20</sub><sup>D</sup> = +64 (c. 0.1, MeOH).

<sup>§</sup> Inferred from HSQC analysis.

**(R)-[[(11S,13S)-5-Chloro-1,9-diazatetracyclo[9.2.2.0<sup>2,10</sup>.0<sup>3,8</sup>]pentadeca-2(10),3(8),4,6-tetraen-13-yl](6-methoxyquinolin-4-yl)methanol 10m**

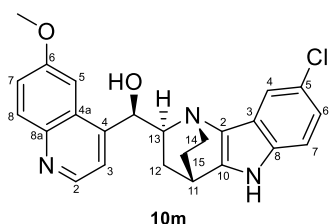

Prepared according to General Procedure B using ketone **6** and 10 mol% Pd(OAc)<sub>2</sub> (24 h). Flash column chromatography eluting with 1:9 to 1:4 ({50:80:1 CH<sub>2</sub>Cl<sub>2</sub>:EtOH:NH<sub>4</sub>OH}/CH<sub>2</sub>Cl<sub>2</sub>) gave the *title compound 10m* (80 mg, 191 μmol, 59%) as a yellow solid. <sup>1</sup>H NMR (500 MHz, CD<sub>3</sub>OD):

δ 8.64 (1H, d, *J* 4.6, quinoline 2-H), 7.85 (1H, d, *J* 9.3, quinoline 8-H),

7.75 (1H, d, *J* 4.6, quinoline 3-H), 7.61 (1H, d, *J* 2.0, indole 4-H), 7.37 (1H, d, *J* 2.6, quinoline 5-H),

7.30 (1H, dd, *J* 9.3, 2.6, quinoline 7-H), 7.26 (1H, d, *J* 8.5, indole 7-H), 6.96 (1H, dd, *J* 8.5, 2.0,

indole 6-H), 5.99 (1H, app. s, CHOH), 4.25-4.18 (1H, m 14-H<sub>A</sub>), 3.99 (3H, s, OCH<sub>3</sub>), 3.39 (1H, app. s,

11-H), 3.03-2.98 (1H, m, 13-H), 2.63 (1H, td, *J* 11.1, 3.7 Hz 14-H<sub>B</sub>), 2.37-2.31 (1H, m, 12-H<sub>A</sub>),

2.19-2.15 (1H, m CH<sub>2</sub> 15-H<sub>A</sub>), 1.67-1.59 (1H, m, 15-H<sub>B</sub>), 1.16-1.09 (1H, m, 12-H<sub>B</sub>).

<sup>13</sup>C NMR (125 MHz, CD<sub>3</sub>OD): 159.7 (quinoline 6-C), 151.2 (Ar-C<sub>q</sub>), 148.1 (quinoline 2-C),

144.6 (Ar-C<sub>q</sub>), 144.5 (Ar-C<sub>q</sub>), 133.9 (Ar-C<sub>q</sub>), 131.3 (quinoline 8-C), 127.8 (Ar-C<sub>q</sub>), 127.7 (Ar-C<sub>q</sub>),

126.3 (Ar-C<sub>q</sub>), 123.7 (quinoline 7-C), 123.2 (Ar-C<sub>q</sub>), 121.0 (indole 6-C or indole 7-C),

119.3 (quinoline 3-C), 116.2 (indole 4-C), 113.9 (indole 6-C or indole 7-C), 101.8 (quinoline 5-C),

71.7 (CH(OH)), 66.9 (13-C), 56.5 (OCH<sub>3</sub>), 47.1<sup>§</sup> (C-14), 30.5 (15-C), 29.6 (11-C), 27.5 (12-C).

**HRMS** (ESI): C<sub>24</sub>H<sub>23</sub>O<sub>2</sub>N<sub>3</sub>Cl<sup>35</sup> [M+H]<sup>+</sup>; calculated: 420.1473, found: 420.1475. [α]<sub>20</sub><sup>D</sup> = -19 (c. 0.1, MeOH).

<sup>§</sup> Inferred from HSQC analysis.

**(R)-[[(11S,13S)-5-Bromo-1,9-diazatetracyclo[9.2.2.0<sup>2,10</sup>.0<sup>3,8</sup>]pentadeca-2(10),3(8),4,6-tetraen-13-yl](6-methoxyquinolin-4-yl)methanol 10n**

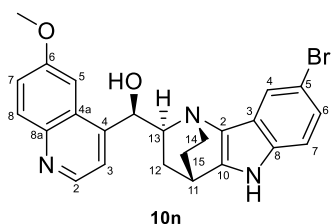

Prepared according to General Procedure B using ketone **6** and 20 mol% Pd(OAc)<sub>2</sub> (48 h). Flash column chromatography eluting with 1:9 to 1:4 ({50:80:1 CH<sub>2</sub>Cl<sub>2</sub>:EtOH:NH<sub>4</sub>OH}/CH<sub>2</sub>Cl<sub>2</sub>) the *title compound* **10n** (22 mg, 48 μmol, 15%) as a yellow solid. <sup>1</sup>H NMR (600 MHz, CD<sub>3</sub>OD, NH and OH not observed): δ 8.64 (1H, d, *J* 4.7, quinoline 2-H), 7.86 (1H, d, *J* 9.2,

quinoline 8-H), 7.77 (1H, d, *J* 1.8, indole 4-H), 7.75 (1H, d, *J* 4.7, quinoline 3-H), 7.38 (1H, d, *J* 2.6, quinoline 5-H), 7.32 (1H, dd, *J* 9.2, 2.7, quinoline 7-H), 7.22 (1H, d, *J* 8.5, indole 7-H), 7.09 (1H, dd, *J* 8.5, 1.8, indole 6-H), 5.99 (1H, app. s, CH(OH)), 4.25-4.19 (1H, m, 14-H<sub>A</sub>), 4.00 (3H, s, OCH<sub>3</sub>), 3.41-3.38 (1H, m, 11-H), 3.05-2.99 (1H, m, 13-H), 2.68-2.61 (1H, m, 14-H<sub>B</sub>), 2.37-2.32 (1H, m, 12-H<sub>A</sub>), 2.21-2.15 (1H, m, 15-H<sub>A</sub>), 1.68-1.61 (1H, m, 15-H<sub>B</sub>), 1.17-1.10 (1H, m, 12-H<sub>B</sub>). <sup>13</sup>C NMR (150 MHz, CD<sub>3</sub>OD): δ 159.7 (quinoline 6-C), 151.1 (Ar-C<sub>q</sub>), 148.2 (quinoline 2-C), 144.6 (Ar-C<sub>q</sub>), 144.5 (Ar-C<sub>q</sub>), 134.3 (Ar-C<sub>q</sub>), 131.3 (quinoline 8-C), 127.8 (Ar-C<sub>q</sub>), 127.5 (Ar-C<sub>q</sub>), 123.9 (Ar-C<sub>q</sub>), 123.7 (quinoline 7-C), 123.7 (indole 6-C), 119.3 (indole 4-C), 119.3 (quinoline 3-C), 114.3 (indole 7-C), 113.9 (Ar-C<sub>q</sub>), 101.9 (quinoline 5-C), 71.7 (CH(OH)), 67.1 (13-C), 56.6 (OCH<sub>3</sub>), 48.3 (14-C), 30.5 (15-C), 29.7 (11-C), 27.5 (12-C). HRMS (ESI): C<sub>24</sub>H<sub>23</sub>O<sub>2</sub>N<sub>3</sub><sup>79</sup>Br [M+H]<sup>+</sup>; calculated: 464.0968, found: 464.0965. C<sub>24</sub>H<sub>23</sub>O<sub>2</sub>N<sub>3</sub><sup>81</sup>Br [M+H]<sup>+</sup>; calculated: 466.0948, found: 466.0945. [α]<sub>20</sub><sup>D</sup> = +164 (c. 0.1, MeOH).

**(R)-(6-Methoxyquinolin-4-yl)[(11S,13S)-6-methyl-1,9-diazatetracyclo[9.2.2.0<sup>2,10</sup>.0<sup>3,8</sup>]pentadeca-2(10),3(8),4,6-tetraen-13-yl]methanol 10o**

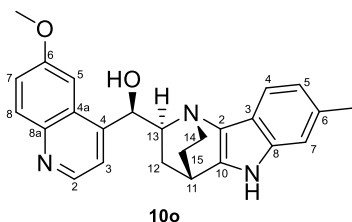

Prepared according to General Procedure B using ketone **6** and 20 mol% Pd(OAc)<sub>2</sub> (48 h). Flash column chromatography eluting with 1:9 to 1:4 ({50:80:1 CH<sub>2</sub>Cl<sub>2</sub>:EtOH:NH<sub>4</sub>OH}/CH<sub>2</sub>Cl<sub>2</sub>) gave the *title compound* **10o** (5 mg, 12 μmol, 4%) as a yellow solid. <sup>1</sup>H NMR (500 MHz, CD<sub>3</sub>OD, NH and OH not observed): δ 8.65 (1H, d, *J* 4.7, quinoline 2-H),

7.87 (1H, d, *J* 9.2, quinoline 8-H), 7.76 (1H, d, *J* 4.7, quinoline 3-H), 7.51 (1H, d, *J* 8.0, indole 4-H), 7.39 (1H, d, *J* 2.4, quinoline 5-H), 7.33 (1H, dd, *J* 9.2, 2.4, quinoline 7-H), 7.11 (1H, s, indole 7-H), 6.87 (1H, d, *J* 8.0, indole 5-H), 6.02 (1H, app. s, CH(OH)), 4.27-4.21 (1H, m, 14-H<sub>A</sub>), 3.99 (3H, s, OCH<sub>3</sub>), 3.40-3.36 (1H, m, 11-H), 3.08-3.02 (1H, m, 13-H), 2.70-2.62 (1H, m, 14-H<sub>B</sub>), 2.39 (3H, s, CH<sub>3</sub>) 2.37-2.31 (1H, m, 12-H<sub>A</sub>), 2.21-2.13 (1H, m, 15-H<sub>A</sub>), 1.68-1.60 (1H, m, 15-H<sub>B</sub>), 1.16-1.09 (1H, m, 12-H<sub>B</sub>). <sup>13</sup>C NMR (125 MHz, CD<sub>3</sub>OD): δ 159.7 (quinoline 6-C), 151.2 (Ar-C<sub>q</sub>), 148.1 (quinoline 2-C), 144.5 (Ar-C<sub>q</sub>), 141.5 (Ar-C<sub>q</sub>), 136.0 (Ar-C<sub>q</sub>), 131.2 (quinoline 8-C), 130.7 (Ar-C<sub>q</sub>), 127.8 (Ar-C<sub>q</sub>), 123.7 (quinoline 7-C), 122.1 (indole 5-C), 120.2 (Ar-C<sub>q</sub>), 120.1 (Ar-C<sub>q</sub>), 119.3 (quinoline 3-C), 116.4 (indole 4-C), 112.7 (indole 7-C), 101.9 (quinoline 5-C), 71.6 (CH(OH)), 67.0 (13-C), 56.6 (OCH<sub>3</sub>), 46.3 (14-C), 30.5 (15-C), 29.5 (11-C), 27.6 (12-C), 21.8 (CH<sub>3</sub>). HRMS (ESI): C<sub>25</sub>H<sub>26</sub>O<sub>2</sub>N<sub>3</sub> [M+H]<sup>+</sup>; calculated: 400.2020, found: 400.2019. [α]<sub>D</sub><sup>20</sup> = -31 (c. 0.1, MeOH).



**(1*R*,11*S*,13*S*)-6-Carboxy-13-[(*R*)-hydroxy(6-methoxyquinolin-4-yl)methyl]-1,9-diazatetracyclo[9.2.2.0<sup>2,10</sup>.0<sup>3,8</sup>]pentadeca-2(10),3(8),4,6-tetraen-1-ium trifluoroacetate **10p****

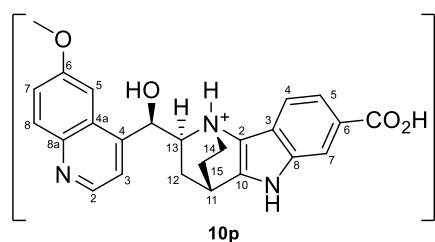

Prepared according to General Procedure B using ketone **6** and 20 mol% Pd(OAc)<sub>2</sub> (48 h). Purification by mass-directed preparative HPLC (MeCN in H<sub>2</sub>O + 0.1% TFA; Rt = 7.2 min) gave the *title compound 10p* (25 mg, 46 μmol, 14%) as a yellow solid. <sup>1</sup>H NMR (500 MHz, CD<sub>3</sub>OD, CO<sub>2</sub>H, NH<sup>+</sup>, NH and OH not observed): δ 8.87 (1H, d, *J* 5.3, quinoline 2-H), 8.24 (1H, d, *J* 1.4, indole 7-H), 8.14 (1H, d, *J* 9.3, quinoline 8-H), 7.89 (1H, d, *J* 5.3, quinoline 3-H), 7.78 (1H, dd, *J* 8.5, 1.4, indole 5-H), 7.72 (1H, dd, *J* 9.3, 2.5, quinoline 7-H), 7.48 (1H, d, *J* 2.5, quinoline 5-H), 7.33 (1H, d, *J* 8.5, indole 4-H), 5.62 (1H, d, *J* 5.4, CH(OH)), 4.60 (1H, app. dt, *J* 8.6, 5.9, 13-H), 4.03-3.94 (1H, m, 14-H<sub>A</sub>), 3.88-3.82 (1H, m, 11-H), 3.81 (3H, s, OCH<sub>3</sub>), 3.19-3.12 (1H, m, 14-H<sub>B</sub>), 2.31-2.23 (2 H, m, 12-H<sub>A</sub> and 15-H<sub>A</sub>), 2.14-2.05 (1H, m, 12-H<sub>B</sub>), 1.93-1.81 (1H, m, 15-H<sub>B</sub>). <sup>13</sup>C NMR (125 MHz, CD<sub>3</sub>OD, CF<sub>3</sub>CO<sub>2</sub><sup>-</sup> not observed): δ 170.5 (CO<sub>2</sub>H), 162.6 (q, *J*<sub>CF</sub> 35.6, CF<sub>3</sub>CO<sub>2</sub><sup>-</sup>), 161.3 (quinoline 6-C), 153.5 (Ar-C<sub>q</sub>), 144.2 (quinoline 2-C), 143.2 (Ar-C<sub>q</sub>), 138.8 (Ar-C<sub>q</sub>), 135.1 (Ar-C<sub>q</sub>), 129.1 (Ar-C<sub>q</sub>), 127.3 (quinoline 7-C), 126.8 (quinoline 8-C), 125.2 (Ar-C<sub>q</sub>), 123.4 (Ar-C<sub>q</sub>), 123.1 (indole 5-C), 121.9 (quinoline 3-C), 116.8 (Ar-C<sub>q</sub>), 115.9 (indole 7-C), 113.9 (indole 4-C), 103.3 (quinoline 5-C), 69.9 (CH(OH)), 67.6 (13-C), 57.1 (14-C), 56.6 (OCH<sub>3</sub>), 30.1 (12-C), 28.7 (11-C), 25.2 (15-C).

**HRMS** (ESI): C<sub>25</sub>H<sub>24</sub>O<sub>4</sub>N<sub>3</sub> [M+H]<sup>+</sup>; calculated: 430.1761, found: 430.1759. [α]<sub>20</sub><sup>D</sup> = +71 (c. 0.1, MeOH).

**(R)-(6-Methoxyquinolin-4-yl)[(11S,13S)-6-(trifluoromethyl)-1,9-diazatetracyclo[9.2.2.0<sup>2,10</sup>.0<sup>3,8</sup>]pentadeca-2(10),3(8),4,6-tetraen-13-yl]methanol 10r**

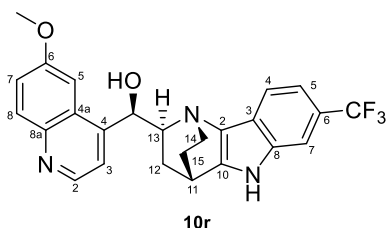

Prepared according to General Procedure B using ketone **6** and 10 mol% Pd(OAc)<sub>2</sub> (24 h). Flash column chromatography eluting with 1:9 to 1:4 ({50:80:1 CH<sub>2</sub>Cl<sub>2</sub>:EtOH:NH<sub>4</sub>OH}/CH<sub>2</sub>Cl<sub>2</sub>) gave the *title compound* **10r** (101 mg, 0.22 mmol, 70%) as a yellow solid.

**<sup>1</sup>H NMR** (500 MHz, CD<sub>3</sub>OD, NH and OH not observed): δ 8.65 (1H, d, *J* 4.7, quinoline 2-H), 7.87 (1H, d, *J* 9.2, quinoline 8-H), 7.78-7.74 (2 H, m, quinoline 3-H indole 5-H), 7.63 (1H, s, indole 7-H), 7.40 (1H, d, *J* 2.6, quinoline 5-H), 7.32 (1H, dd, *J* 9.2, 2.6, quinoline 7-H), 7.28 (1H, d, *J* 7.6, indole 4-H), 6.01 (1H, app. s, CH(OH)), 4.27-4.21 (1H, m, 14-H<sub>A</sub>), 3.98 (3H, s, OCH<sub>3</sub>), 3.47-3.43 (1H, m, 11-H), 3.07-3.02 (1H, m, 13-H), 2.67-2.60 (1H, m, 14-H<sub>B</sub>), 2.41-2.35 (1H, m, 12-H<sub>A</sub>), 2.24-2.17 (1H, m, 15-H<sub>A</sub>), 1.68-1.61 (1H, m, 15-H<sub>B</sub>), 1.22-1.15 (1H, m, 12-H<sub>B</sub>). **<sup>13</sup>C NMR** (125 MHz, CD<sub>3</sub>OD): δ 159.7 (quinoline 6-C), 151.1 (Ar-C<sub>q</sub>), 148.2 (quinoline 2-C), 146.4 (Ar-C<sub>q</sub>), 144.6 (Ar-C<sub>q</sub>), 134.3 (Ar-C<sub>q</sub>), 131.3 (quinoline 8-C), 128.3 (Ar-C<sub>q</sub>), 127.8 (Ar-C<sub>q</sub>), 126.5 (q, *J*<sub>CF</sub> 271.5, CF<sub>3</sub>), 124.4 (Ar-C<sub>q</sub>), 123.7 (quinoline 7-C), 122.8 (q, *J*<sub>CF</sub> 31.7, indole 6-C), 117.0 (q, *J*<sub>CF</sub> 2.2, indole 5-C), 117.0 (indole 4-C), 110.2 (q, *J*<sub>CF</sub> 5.2, indole 7-C), 101.9 (quinolone 5-C), 71.7 (CH(OH)), 66.8 (13-C), 56.6 (OCH<sub>3</sub>), 48.4 (14-C), 30.3 (15-C), 29.7 (11-C), 27.6 (12-C). **HRMS** (ESI): C<sub>25</sub>H<sub>23</sub>O<sub>2</sub>N<sub>3</sub>F<sub>3</sub> [M+H]<sup>+</sup>; calculated: 454.1737, found: 454.1735. [α]<sub>20</sub><sup>D</sup> = +20 (c. 0.1, MeOH).

**(R)-[[(11S,13S)-6-Chloro-1,9-diazatetracyclo[9.2.2.0<sup>2,10</sup>.0<sup>3,8</sup>]pentadeca-2(10),3(8),4,6-tetraen-13-yl][(6-methoxyquinolin-4-yl)methanol 10s**

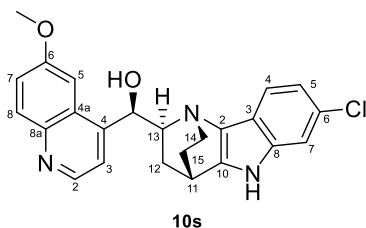

Prepared according to General Procedure B using ketone **6** and 20 mol% Pd(OAc)<sub>2</sub> (48 h). Flash column chromatography eluting with 1:9 to 1:4 ({50:80:1 CH<sub>2</sub>Cl<sub>2</sub>:EtOH:NH<sub>4</sub>OH}/CH<sub>2</sub>Cl<sub>2</sub>) gave the *title compound 10s* (28 mg, 66 μmol, 20%) as a yellow solid.

**<sup>1</sup>H NMR** (500 MHz, CD<sub>3</sub>OD): δ 8.64 (1H, d, *J* 4.7, quinoline 2-H), 7.87 (1H, d, *J* 9.2, quinoline 8-H), 7.75 (1H, d, *J* 4.7, quinoline 3-H), 7.57 (1H, d, *J* 8.5, indole 4-H), 7.39 (1H, d, *J* 2.5, quinoline 5-H), 7.33-7.29 (2H, m, indole 7-H and quinoline 7-H), 7.00 (1H, dd, *J* 8.5, 1.8, indole 5-H), 5.99 (1H, s, CH(OH)), 4.21 (1H, ddd, *J* 12.7, 8.8, 4.1, 14-H<sub>A</sub>), 3.97 (3H, s, OCH<sub>3</sub>), 3.41-3.38 (1H, m, 11-H), 3.05-2.99 (1H, m, 13-H), 2.61 (1H, td, *J* 11.1, 4.2, 14-H<sub>B</sub>), 2.37-2.31 (1H, m, 12-H<sub>A</sub>), 2.20-2.15 (1H, m, 15-H<sub>A</sub>), 1.62 (1H, td, *J* 11.1, 3.4, 15-H<sub>B</sub>), 1.19-1.13 (1H, m, 12-H<sub>B</sub>). **<sup>13</sup>C NMR** (150 MHz, CD<sub>3</sub>OD): δ 159.7 (quinoline 6-C), 151.1 (Ar-C<sub>q</sub>), 148.2 (quinoline 2-C), 144.6 (Ar-C<sub>q</sub>), 143.7 (Ar-C<sub>q</sub>), 135.9 (Ar-C<sub>q</sub>), 131.3 (quinoline 8-C), 128.1 (Ar-C<sub>q</sub>), 127.8 (Ar-C<sub>q</sub>), 126.7 (Ar-C<sub>q</sub>), 123.6 (quinoline 7-C), 121.0 (Ar-C<sub>q</sub>), 120.9 (indole 5-C), 119.4 (quinoline 3-C), 117.6 (indole 4-C), 112.6 (indole 7-C), 102.0 (quinoline 5-H), 71.7 (CH(OH)), 66.9 (13-C), 56.6 (OCH<sub>3</sub>), 48.5<sup>§</sup> (14-C), 30.5 (15-C), 29.6 (11-C), 27.7 (12-C). **HRMS** (ESI): C<sub>24</sub>H<sub>23</sub>O<sub>2</sub>N<sub>3</sub><sup>35</sup>Cl [M+H]<sup>+</sup>; calculated: 420.1473, found: 420.1472. C<sub>24</sub>H<sub>23</sub>O<sub>2</sub>N<sub>3</sub><sup>37</sup>Cl [M+H]<sup>+</sup>; calculated: 422.1444, found: 422.1443. [α]<sub>20</sub><sup>D</sup> = +56 (c. 0.1, MeOH).

<sup>§</sup> Inferred from HSQC analysis.

**(S)-[[(11S,13S)-6-Bromo-1,9-diazatetracyclo[9.2.2.0<sup>2,10</sup>.0<sup>3,8</sup>]pentadeca-2(10),3(8),4,6-tetraen-13-yl](6-methoxyquinolin-4-yl)methanol 10t**

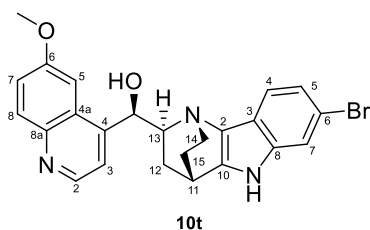

Prepared according to General Procedure B using ketone **6** and 30 mol% Pd(OAc)<sub>2</sub> (72 h). Flash column chromatography eluting with 1:9 to 1:4 ({50:80:1 CH<sub>2</sub>Cl<sub>2</sub>:EtOH:NH<sub>4</sub>OH}/CH<sub>2</sub>Cl<sub>2</sub>) gave the *title compound 10t* (26 mg, 55 μmol, 27%) as a yellow solid.

**<sup>1</sup>H NMR** (600 MHz, CD<sub>3</sub>OD, NH and OH not observed): δ 8.64 (1H, d, *J* 4.6, quinoline 2-H), 7.86 (1H, dd, *J* 9.2, quinoline 8-H), 7.75 (1H, d, *J* 4.6, quinoline 3-H), 7.52 (1H, d, *J* 8.4, indole 4-H), 7.48 (1H, d, *J* 1.7, indole 7-H) 7.39 (1H, d, *J* 2.3, quinoline 5-H), 7.33-7.29 (1H, m, quinoline 7-H), 7.12 (1H, dd, *J* 8.4, 1.7, indole 5-H), 6.01 (1H, app. s, CH(OH)), 4.27-4.18 (1H, m, 14-H<sub>A</sub>), 3.97 (3H, s, OCH<sub>3</sub>), 3.41-3.38 (1 H, m, 11-H), 3.10-2.97 (1H, m, 13-H), 2.68-2.58 (1H, m, 14-H<sub>B</sub>), 2.38-2.31 (1H, m, 12-H<sub>A</sub>), 2.21-2.14 (1H, m, 15-H<sub>A</sub>), 1.67-1.58 (1H, m, 15-H<sub>B</sub>), 1.19-1.12 (1H, m, 12-H<sub>B</sub>). **<sup>13</sup>C NMR** (125 MHz, CD<sub>3</sub>OD): δ 159.7 (quinoline 6-C), 151.1 (Ar-C<sub>q</sub>), 148.2 (quinoline 2-C), 144.6 (Ar-C<sub>q</sub>), 143.7 (Ar-C<sub>q</sub>), 136.3 (Ar-C<sub>q</sub>), 131.3 (quinoline 8-C), 127.8 (Ar-C<sub>q</sub>), 123.6 (quinoline 7-C), 123.5 (indole 5-C), 121.3 (Ar-C<sub>q</sub>), 121.1 (Ar-C<sub>q</sub>), 119.4 (quinoline 3-C), 118.0 (indole 4-C), 115.6 (indole 7-C), 114.0 (Ar-C<sub>q</sub>), 102.0 (quinoline 5-C), 71.7 (CH(OH)), 66.9 (13-C), 56.6 (OCH<sub>3</sub>), 48.6 (14-C) 30.4 (15-C), 29.6 (11-C), 27.7 (12-C). **HRMS** (ESI): C<sub>24</sub>H<sub>23</sub>O<sub>2</sub>N<sub>3</sub><sup>81</sup>Br [M+H]<sup>+</sup>; calculated: 466.0948, found: 466.0950. [α]<sub>D</sub><sup>20</sup> = +22 (c. 0.1, MeOH).

**(R)-[[(11S,13S)-7-Methoxy-1,9-diazatetracyclo[9.2.2.0<sup>2,10</sup>.0<sup>3,8</sup>]pentadeca-2(10),3(8),4,6-tetraen-13-yl](6-methoxyquinolin-4-yl)methanol 10u**

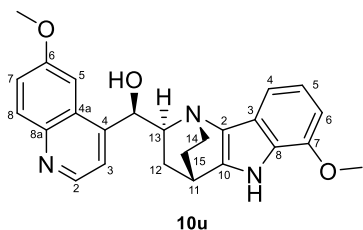

Prepared according to General Procedure B using ketone **6** and 30 mol% Pd(OAc)<sub>2</sub> (72 h). Flash column chromatography eluting with 5-20% {50:80:1 CH<sub>2</sub>Cl<sub>2</sub>:EtOH:NH<sub>4</sub>OH} in CH<sub>2</sub>Cl<sub>2</sub> gave the *title compound 10u* (45 mg, 0.11 mmol, 33%) as a colourless solid.

**<sup>1</sup>H NMR** (500 MHz, CD<sub>3</sub>OD, NH and OH not observed): δ 8.66 (1H, d, *J* 4.7, quinoline 2-H), 7.88 (1H, d, *J* 9.2, quinoline 8-H), 7.77 (1H, d, *J* 4.7, quinoline 3-H), 7.37 (1H, d, *J* 2.5, quinoline 5-H), 7.34 (1H, dd, *J* 9.2, 2.5, quinoline 7-H), 7.25 (1H, d, *J* 8.0, 6-H), 6.99 (1H, app. t, *J* 7.9, 5-H), 6.62 (1H, d, *J* 7.8, 4-H), 6.07 (1H, s, CH(OH)), 4.44-4.30 (1H, m, 14-H<sub>A</sub>), 3.98 (3H, s, OCH<sub>3</sub>), 3.92 (3H, s, OCH<sub>3</sub>), 3.51-3.46 (1H, m, 11-H), 3.23-3.14 (1H, m, 13-H), 2.84-2.74 (1H, m, 14-H<sub>B</sub>), 2.41 (1H, dd, *J* 10.8, 6.5, 12-H<sub>A</sub>), 2.28-2.18 (1H, m, 15-H<sub>A</sub>), 1.75-1.65 (1H, m, 15-H<sub>B</sub>), 1.25-1.16 (1H, m, 12-H<sub>B</sub>). **<sup>13</sup>C NMR** (125 MHz, CD<sub>3</sub>OD, 3 × Ar-C<sub>q</sub> not observed): δ 159.8 (quinolone 6-C), 148.2 (2 peaks, quinoline 2-C and Ar-C<sub>q</sub>), 144.6 (Ar-C<sub>q</sub>), 141.3 (Ar-C<sub>q</sub>), 131.4 (quinoline 8-C), 127.7 (Ar-C<sub>q</sub>), 125.4 (Ar-C<sub>q</sub>), 123.7 (quinoline 7-C), 121.4 (5-C), 119.4 (quinoline 3-C), 109.7 (6-C), 102.1 (4-C), 101.8 (quinoline 5-C), 70.9 (CH(OH)), 67.7 (13-C), 56.6 (OCH<sub>3</sub>), 55.8 (OCH<sub>3</sub>), 51.5 (14-C), 29.7 (11-C), 29.3 (15-C), 27.0 (12-C). **HRMS** (ESI): C<sub>25</sub>H<sub>26</sub>N<sub>3</sub>O<sub>3</sub> [M+H]<sup>+</sup>; calculated: 416.1969, found: 416.1970. [α]<sub>D</sub><sup>20</sup> = -52 (c. 0.1, MeOH).

**(11S,13S)-7-Fluoro-13-[(1R)-1-(6-methoxyquinolin-4-yl)ethyl]-1,9-diazatetracyclo  
[9.2.2.0<sup>2,10</sup>.0<sup>3,8</sup>]pentadeca-3,5,7-triene 10x**

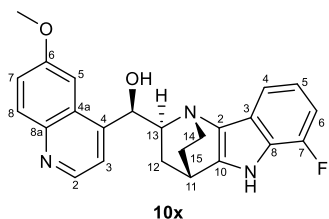

Prepared according to General Procedure B using 30 mol% Pd(OAc)<sub>2</sub> (72 h). Flash column chromatography eluting with 10-25% {50:80:1 CH<sub>2</sub>Cl<sub>2</sub>:EtOH:NH<sub>4</sub>OH} in CH<sub>2</sub>Cl<sub>2</sub> gave the *title compound 10x* (24 mg, 59 μmol, 18%) as brown solid. <sup>1</sup>H NMR (500 MHz, CD<sub>3</sub>OD, NH and OH not observed): δ 8.62 (1H, d, *J* 4.6, quinoline 2-H), 7.84 (1H, d, *J* 9.2,

quinolone 8-H), 7.74 (1H, d, *J* 4.6, quinoline 3-H), 7.41 (1H, d, *J* 8.1, indole 4-H), 7.37 (1H, d, *J* 2.4, quinoline 5-H), 7.28 (1H, dd, *J* 9.2, 2.4, quinoline 7-H), 6.99-6.89 (1H, m, indole 5-H), 6.73 (1H, dd, *J* 11.5, 8.1, indole 6-H), 5.99 (1H, s, CH(OH)), 4.25-4.18 (1H, m, 14-H<sub>A</sub>), 3.96 (3H, s, OCH<sub>3</sub>), 3.41 (1H, s, 11-H), 3.08-2.99 (1H, m, 13-H), 2.66-2.58 (1H, m, 14-H<sub>B</sub>), 2.39-2.31 (1H, m, 12-H<sub>A</sub>), 2.20-2.13 (1H, m, 15-H<sub>A</sub>), 1.66-1.57 (1H, m, 15-H<sub>B</sub>), 1.17-1.11 (1H, m, 12-H<sub>B</sub>). <sup>13</sup>C NMR (126 MHz, CD<sub>3</sub>OD): δ 159.6 (quinoline 6-C), 151.4 (d, *J*<sub>CF</sub> 241.9, indole 7-C), 151.2 (Ar-C<sub>q</sub>), 148.1 (quinolone 2-C), 144.5 (Ar-C<sub>q</sub>), 143.8 (Ar-C<sub>q</sub>), 131.2 (quinoline 8-C), 128.8 (Ar-C<sub>q</sub>), 127.8 (Ar-C<sub>q</sub>), 126.1 (Ar-C<sub>q</sub>), 123.6 (quinoline 7-C), 123.2, (Ar-C<sub>q</sub>) 120.6 (d, *J*<sub>CF</sub> 6.6, indole 5-C), 119.3 (quinolone 3-C), 112.7 (d, *J*<sub>CF</sub> 3.1, indole 4-C), 105.8 (d, *J*<sub>CF</sub> 16.7, indole 6-C), 101.8 (quinolone 5-C), 71.6 (CH(OH)), 66.8 (13-C), 56.6 (OCH<sub>3</sub>), 48.4 (14-C), 30.4 (15-C), 29.6 (11-C), 27.6 (12-C). HRMS (ESI): C<sub>24</sub>H<sub>23</sub>O<sub>2</sub>N<sub>3</sub>F [M+H]<sup>+</sup>; calculated: 404.1769, found: 404.1769 [α]<sub>D</sub><sup>20</sup> = -8 (c. 0.1, MeOH).

**(11S,13S)-7-chloro-13-[(1R)-1-(6-methoxyquinolin-4-yl)ethyl]-1,9-diazatetracyclo  
[9.2.2.0<sup>2,10</sup>.0<sup>3,8</sup>]pentadeca-3,5,7-triene 10y**

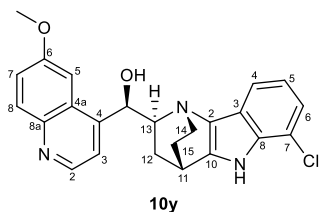

Prepared according to General Procedure B using 10 mol% Pd(OAc)<sub>2</sub> (24 h). Flash column chromatography eluting with 10-25% {50:80:1 CH<sub>2</sub>Cl<sub>2</sub>:EtOH:NH<sub>4</sub>OH} in CH<sub>2</sub>Cl<sub>2</sub> gave the *title compound 10y* (71 mg, 169 μmol, 53%) as yellow solid. <sup>1</sup>H NMR (500 MHz, CD<sub>3</sub>OD, NH and OH

not observed): δ 8.58 (1H, d, *J* 4.6, quinoline 2-H), 7.80 (1H, d, *J* 9.2, quinoline 8-H), 7.76 (1H, d, *J* 4.6, quinoline 3-H), 7.30 (1H, d, *J* 2.3, quinoline 5-H), 7.29-7.26 (1H, m, indole 4-H), 7.24 (1H, dd, *J* 9.2, 2.3, quinoline 7-H), 6.98-6.95 (2H, m, indole 5-H and indole 6-H), 6.37 (1H, app. s, CH(OH)), 4.51 (1H, app. s, 14-H<sub>A</sub>), 3.95 (3H, s, OCH<sub>3</sub>), 3.63-3.56 (1H, m, 11-H)<sup>†††</sup>, 3.40 (1H, s, 13-H), 2.95 (1H, app. s, 14-H<sub>B</sub>), 2.54-2.45 (1H, m, 12-H<sub>A</sub>), 2.35-2.26 (1H, m, 15-H<sub>A</sub>), 1.82-1.68 (1H, m, 15-H<sub>B</sub>), 1.35 (1H, app. t, *J* 11.2, 12-H<sub>B</sub>). <sup>13</sup>C NMR (126 MHz, CD<sub>3</sub>OD, 1 × Ar-C<sub>q</sub> not observed): δ 159.8 (quinoline 6-C), 149.1 (Ar-C<sub>q</sub>), 148.0 (quinoline 2-C), 144.3 (Ar-C<sub>q</sub>), 142.9 (Ar-C<sub>q</sub>), 136.3 (Ar-C<sub>q</sub>), 131.3 (quinoline 8-C), 127.6 (Ar-C<sub>q</sub>), 123.7 (quinoline 7-C), 122.9 (indole 6-C), 122.7 (Ar-C<sub>q</sub>), 121.4 (indole 5-C), 119.9 (quinoline 3-C), 118.6 (Ar-C<sub>q</sub>), 112.1 (indole 4-C), 101.4 (quinoline 5-C), 69.5 (13-C), 68.9 (CH(OH)), 56.7 (OCH<sub>3</sub>), 51.6 (14-C), 28.8 (11-C), 27.8 (15-C), 26.5 (12-C). **HRMS** (ESI): C<sub>24</sub>H<sub>23</sub>O<sub>2</sub>N<sub>3</sub><sup>35</sup>Cl [M+H]<sup>+</sup>; calculated: 420.1473, found: 420.1471; C<sub>24</sub>H<sub>23</sub>O<sub>2</sub>N<sub>3</sub><sup>37</sup>Cl [M+H]<sup>+</sup>; calculated: 422.1443, found: 422.1442. [α]<sub>D</sub><sup>20</sup> = +42 (c. 0.1, MeOH).

<sup>†††</sup> Determined via COSY.

**(1*R*,11*S*,13*S*)-13-[(*R*)-Hydroxy(6-methoxyquinolin-4-yl)methyl]-7-methoxy-5-methoxycarbonyl)-1,9-diazatetracyclo[9.2.2.0<sup>2,10</sup>.0<sup>3,8</sup>]pentadeca-2(10),3(8),4,6-tetraen-1-ium trifluoroacetate **10z****

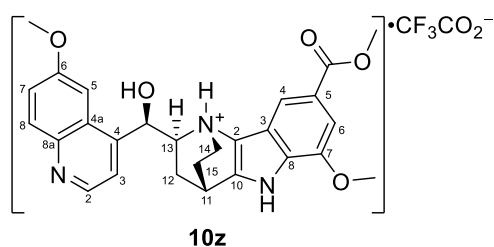

Prepared according to General Procedure B using ketone **6**, MgSO<sub>4</sub> (1.5 eq.) and 30 mol% Pd(OAc)<sub>2</sub> (72 h). Flash column chromatography eluting with 5-20% {50:80:1 CH<sub>2</sub>Cl<sub>2</sub>:EtOH:NH<sub>4</sub>OH} in CH<sub>2</sub>Cl<sub>2</sub>, followed by further purification using mass-directed HPLC (MeCN in H<sub>2</sub>O + 0.1%

TFA) gave the *title compound* **10z** (3 mg, 4.7 μmol, 1%) as an orange oil. **<sup>1</sup>H NMR** (500 MHz, CD<sub>3</sub>OD, NH and OH not observed): δ 8.90 (1H, d, *J* 5.5, quinoline 2-H), 8.23 (1H, d, *J* 1.3, indole 4-H or 6-H), 8.21 (1H, d, *J* 5.5, quinoline 3-H), 8.04 (1H, d, *J* 9.3, quinoline 8-H), 7.71 (1H, d, *J* 2.6, quinoline 5-H), 7.63 (1H, dd, *J* 9.3, 2.6, quinoline 7-H), 7.34 (1H, d, *J* 1.3, indole 4-H or 6-H), 6.66 (1H, s, CH(OH)), 4.78 (1H, ddd, *J* 11.8, 9.3, 4.3, 14-H<sub>A</sub>), 4.08 (3H, s, OCH<sub>3</sub>), 3.98 (3H, s, OCH<sub>3</sub>), 3.92 (3H, s, OCH<sub>3</sub>), 3.78-3.75 (1H, m, 11-H), 3.72-3.67 (1H, m, 13-H), 3.36-3.29 (1H, 14-H<sub>B</sub>)<sup>§</sup>, 2.61 (1H, ddd, *J* 12.2, 6.6, 2.2, 12-H<sub>A</sub>), 2.50-2.43 (1H, m, 15-H<sub>A</sub>), 2.02-1.93 (1H, m, 15-H<sub>B</sub>), 1.45-1.37 (1H, m, 12-H<sub>B</sub>). **<sup>13</sup>C NMR** (125 MHz, CD<sub>3</sub>OD, CF<sub>3</sub>CO<sub>2</sub><sup>-</sup> and 2 × Ar-C<sub>q</sub> not observed): 169.2 (CO<sub>2</sub>Me), 162.0 (quinoline 6-C), 148.0 (Ar-C<sub>q</sub>), 143.5 (quinoline 2-C), 141.4 (Ar-C<sub>q</sub>), 128.7 (Ar-C<sub>q</sub>), 128.5 (Ar-C<sub>q</sub>), 128.2 (quinoline 7-C), 126.0 (quinoline 8-C), 125.2 (Ar-C<sub>q</sub>), 120.5 (quinolone 3-C), 119.5 (Ar-C<sub>q</sub>), 119.2 (Ar-C<sub>q</sub>), 113.5 (indole 4-C or 6-C), 103.7 (indole 4-C or 6-C), 102.5 (quinoline 5-C), 69.8 (13-C), 68.0 (CH(OH)), 57.6 (OCH<sub>3</sub>), 56.2 (OCH<sub>3</sub>), 52.6 (OCH<sub>3</sub>), 51.2 (14-C), 28.8 (11-C), 27.0 (12-C), 24.7 (15-C). **HRMS** (ESI): C<sub>27</sub>H<sub>28</sub>O<sub>5</sub>N<sub>3</sub> [M+H]<sup>+</sup>; calculated: 474.2024, found: 474.2020.

<sup>§</sup> Inferred from HSQC analysis.



### 6.3.2.4 Preparation of the quinine-derived azaindoles

#### (*R*)-(6-Methoxyquinolin-4-yl)[(11*S*,13*S*)-1,6,9-triazatetracyclo[9.2.2.0<sup>2,10</sup>.0<sup>3,8</sup>]pentadeca-2(10),3(8),4,6-tetraen-13-yl]methanol **10v**

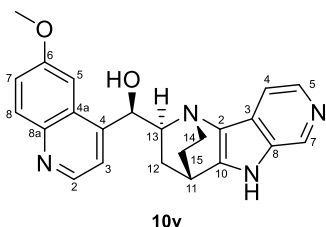

Prepared according to General Procedure B using ketone **6** and 10 mol% Pd(OAc)<sub>2</sub> (24 h). Flash column chromatography eluting with 1:9 to 1:4 ({50:80:1 CH<sub>2</sub>Cl<sub>2</sub>:EtOH:NH<sub>4</sub>OH}/CH<sub>2</sub>Cl<sub>2</sub>) gave the *title compound 10v* as a yellow solid (81 mg, 209 μmol, 65%). **<sup>1</sup>H NMR** (600 MHz, CD<sub>3</sub>OD, NH and OH not observed): δ 8.65 (1H, d, *J* 4.7, quinoline 2-H), 8.59 (1H, s, indole 7-H), 8.04 (1H, d, *J* 5.7, indole 5-H), 7.87 (1H, d, *J* 9.2, quinoline 8-H), 7.76 (1H, d, *J* 4.7, quinoline 3-H), 7.63 (1H, d, *J* 5.7, indole 4-H), 7.41 (1H, d, *J* 2.6, quinoline 5-H), 7.32 (1H, dd, *J* 9.2, 2.6, quinoline 7-H), 5.99 (1H, app. s, CH(OH)), 4.26-4.20 (1H, m, 14-H<sub>A</sub>), 3.98 (3H, s, OCH<sub>3</sub>), 3.49 (1H, s, 11-H), 3.05-3.00 (1H, m, 13-H), 2.65-2.59 (1H, m, 14-H<sub>B</sub>), 2.44-2.39 (1H, m, 12-H<sub>A</sub>), 2.26-2.20 (1H, m, 15-H<sub>A</sub>), 1.68-1.61 (1H, m, 15-H<sub>B</sub>), 1.27-1.20 (1H, m, 12-H<sub>B</sub>). **<sup>13</sup>C NMR** (150 MHz, CD<sub>3</sub>OD): δ 159.7 (quinoline 6-C), 151.0 (Ar-C<sub>q</sub>), 149.9 (Ar-C<sub>q</sub>), 148.2 (quinoline 2-C), 144.6 (Ar-C<sub>q</sub>), 138.1 (indole 5-C), 134.4 (indole 7-C), 132.5 (Ar-C<sub>q</sub>), 131.3 (quinoline 8-C), 127.9 (Ar-C<sub>q</sub>), 127.8 (Ar-C<sub>q</sub>), 126.8 (Ar-C<sub>q</sub>), 123.6 (quinoline 7-C), 119.4 (quinoline 3-C), 111.9 (indole 4-C), 102.0 (quinoline 5-C), 71.7 (CH(OH)), 66.7 (13-C), 56.6 (O-CH<sub>3</sub>), 48.3 (14-C), 30.1 (15-C), 29.9 (11-C), 27.6 (12-C). **HRMS** (ESI): C<sub>23</sub>H<sub>23</sub>O<sub>2</sub>N<sub>4</sub> [M+H]<sup>+</sup>; calculated: 387.1816, found: 387.1816.  $[\alpha]_{20}^D = +58$  (c. 0.1, MeOH).

**(1*R*,11*S*,13*S*)-13-[(*R*)-Hydroxy(6-methoxyquinolin-4-yl)methyl]-1,7,9-triazatetracyclo  
[9.2.2.0<sup>2,10</sup>.0<sup>3,8</sup>]pentadeca-2(10),3(8),4,6-tetraen-1-ium trifluoroacetate **10w****

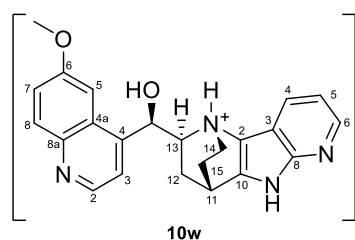

•CF<sub>3</sub>CO<sub>2</sub><sup>-</sup> Prepared according to General Procedure B using ketone **6** and 30 mol% Pd(OAc)<sub>2</sub> (72 h). Flash column chromatography eluting with 1:9 to 1:4 ({50:80:1 CH<sub>2</sub>Cl<sub>2</sub>:EtOH:NH<sub>4</sub>OH}/CH<sub>2</sub>Cl<sub>2</sub>) followed by mass-directed preparative HPLC (MeCN in H<sub>2</sub>O + 0.1% TFA; Rt = 10.2 min) gave the *title compound* **10w** (21 mg, 43 μmol,

13%) as a colourless solid. <sup>1</sup>H NMR (500 MHz, CD<sub>3</sub>OD, NH<sup>+</sup>, NH and OH not observed): δ 8.94 (1H, d, *J* 5.5, quinoline 2-H), 8.28-8.23 (3 H, m, indole 4-H, indole 6-H, quinoline 3-H), 8.08 (1H, d, *J* 9.3, quinoline 8-H), 7.74 (1H, d, *J* 2.3, quinoline 5-H), 7.67 (1H, dd, *J* 9.3, 2.3, quinoline 7-H), 7.28 (1H, dd, *J* 7.9, 5.0, indole 5-H), 6.67 (1H, app. s, CH(OH)), 4.85-4.78 (1H, m, 14-H<sub>A</sub>), 4.08 (3H, s, OCH<sub>3</sub>), 3.82 (1H, s, 11-H), 3.79-3.73 (1H, m, 13-H), 3.29-3.26 (1H, m, 14-H<sub>B</sub>), 2.68-2.64 (1H, m, 12-H<sub>A</sub>), 2.55-2.47 (1H, m, 15-H<sub>A</sub>), 2.04-1.94 (1H, m, 15-H<sub>B</sub>), 1.52-1.45 (1H, m, 12-H<sub>B</sub>). <sup>13</sup>C NMR (125 MHz, CD<sub>3</sub>OD, CF<sub>3</sub>CO<sub>2</sub><sup>-</sup> not observed): δ 162.8 (q, *J*<sub>CF</sub> 36.7, CF<sub>3</sub>CO<sub>2</sub><sup>-</sup>). 161.9 (quinoline 6-C), 156.0 (Ar-C<sub>q</sub>), 146.5 (Ar-C<sub>q</sub>), 143.6 (indole 6-C), 143.4 (quinoline 2-C), 141.6 (Ar-C<sub>q</sub>), 137.4 (Ar-C<sub>q</sub>), 128.7 (Ar-C<sub>q</sub>), 128.1 (quinoline 7-C), 126.6 (indole 4-C), 125.9 (quinoline 8-C), 120.7 (quinoline 3-C), 118.4 (indole 5-C), 116.8 (Ar-C<sub>q</sub>), 112.4 (Ar-C<sub>q</sub>), 102.5 (quinoline 5-C), 69.2 (13-C), 67.9 (CH(OH)), 57.4 (OCH<sub>3</sub>), 51.3 (14-C), 28.6 (11-C), 27.0 (15-C), 24.9 (12-C). HRMS (ESI): C<sub>23</sub>H<sub>23</sub>O<sub>2</sub>N<sub>4</sub> [M+H]<sup>+</sup>; calculated: 387.1816, found: 387.1816. [α]<sub>D</sub><sup>20</sup> = -37 (c. 0.1, MeOH).

**(1*R*,11*S*,13*S*)-4-Chloro-13-[(*R*)-hydroxy(6-methoxyquinolin-4-yl)methyl]-1,7,9-triazatetracyclo[9.2.2.0<sup>2,10</sup>.0<sup>3,8</sup>]pentadeca-2(10),3(8),4,6-tetraen-1-ium trifluoroacetate 10w-a**

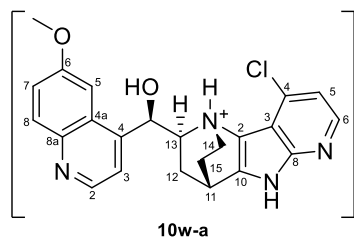

•CF<sub>3</sub>CO<sub>2</sub><sup>-</sup> Prepared according to General Procedure B using ketone **6**, MgSO<sub>4</sub> (1.5 eq.) and 30 mol% Pd(OAc)<sub>2</sub> (72 h). Purification by mass-directed HPLC (MeCN in H<sub>2</sub>O + 0.1% TFA) gave the *title compound* **10w-a** (32 mg, 59 μmol, 19%) as a pale brown solid.

**<sup>1</sup>H NMR** (700 MHz, CD<sub>3</sub>OD, NH<sup>+</sup>, NH and OH not observed):

δ 8.96 (1H, d, *J* 5.5, quinoline 2-H), 8.27 (1H, d, *J* 5.5, quinoline 3-H), 8.18 (1H, d, *J* 5.3, indole 6-H), 8.12 (1H, d, *J* 9.2, quinoline 8-H), 7.75-7.70 (2H, m, quinoline 5-H and 7-H), 7.31 (1H, d, *J* 5.3, indole 5-H), 6.78 (1H, app. s, CH(OH)), 4.83-4.76 (1H, m, 14-H<sub>A</sub>), 4.13 (3H, s, OCH<sub>3</sub>), 3.88-3.80 (2H, m, 11-H and 13-H), 3.38-3.33 (1H, m, 14-H<sub>B</sub>), 2.73 (1H, ddd, *J* 12.3, 6.2, 1.9, 12-H<sub>A</sub>), 2.58-2.50 (1H, m, 15-H<sub>A</sub>), 2.04-1.97 (1H, m, 15-H<sub>B</sub>), 1.54-1.49 (1H, m, 12-H<sub>B</sub>). **<sup>13</sup>C NMR** (176 MHz, CD<sub>3</sub>OD, CF<sub>3</sub>CO<sub>2</sub><sup>-</sup> not observed): δ 162.4 (q, *J* 36.2, CF<sub>3</sub>CO<sub>2</sub><sup>-</sup>), 161.7 (quinoline 6-C), 147.5 (Ar-C<sub>q</sub>), 144.1 (quinoline 3-C), 143.9 (quinoline-2-C), 143.5 (Ar-C<sub>q</sub>), 138.0 (Ar-C<sub>q</sub>), 135.8 (Ar-C<sub>q</sub>), 133.3 (Ar-C<sub>q</sub>), 128.7 (Ar-C<sub>q</sub>), 127.6 (quinoline 7-C), 126.4 (quinoline 8-C), 120.7 (indole 6-C), 118.5 (indole 5-C), 114.8 (Ar-C<sub>q</sub>), 111.9 (Ar-C<sub>q</sub>), 102.5 (quinoline 5-C), 70.2 (13-C), 68.0 (CH(OH)), 57.2 (OCH<sub>3</sub>), 52.8 (14-C), 28.4 (11-C), 26.6 (15-C), 25.4 (12-C). **HRMS** (ESI): C<sub>23</sub>H<sub>22</sub>O<sub>2</sub>N<sub>4</sub><sup>35</sup>Cl [M+H]<sup>+</sup>; calculated: 421.1426, found: 421.1423. [α]<sub>20</sub><sup>D</sup> = +34 (c. 0.1, MeOH).

**(R)-(6-Methoxyquinolin-4-yl)[(11S,13S)-5-methyl-1,7,9-triazatetracyclo[9.2.2.0<sup>2,10</sup>.0<sup>3,8</sup>]pentadeca-2(10),3(8),4,6-tetraen-13-yl]methanol 10w-b**

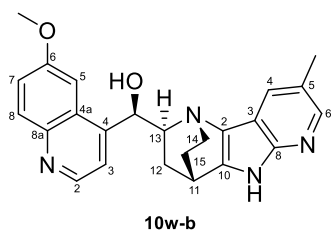

Prepared according to General Procedure B using ketone **6** and 30 mol% Pd(OAc)<sub>2</sub> (72 h). Flash column chromatography eluting with 1:9 to 1:4 ({50:80:1 CH<sub>2</sub>Cl<sub>2</sub>:EtOH:NH<sub>4</sub>OH}/CH<sub>2</sub>Cl<sub>2</sub>) gave the *title compound* **10w-b** (39 mg, 97 μmol, 30%) as a yellow solid. **<sup>1</sup>H NMR** (500 MHz, CD<sub>3</sub>OD, NH and OH not observed): δ 8.65 (1H, d, *J* 4.7, quinoline 2-H), 7.91 (1H, s, indole 6-H), 7.87 (1H, d, *J* 9.2, quinoline 8-H), 7.83 (1H, s, indole 4-H), 7.76 (1H, d, *J* 4.7, quinoline 3-H), 7.41 (1H, d, *J* 2.7, quinoline 5-H), 7.32 (1H, dd, *J* 9.2, 2.7, quinoline 7-H), 5.97 (1H, app. s, CH(OH)), 4.24-4.17 (1H, m, 14-H<sub>A</sub>), 3.99 (3H, s, OCH<sub>3</sub>), 3.46-3.42 (1H, m, 11-H), 3.06-2.99 (1H, m, 13-H), 2.68-2.57 (1H, m, 14-H<sub>B</sub>), 2.42 (3H, s, Py-CH<sub>3</sub>), 2.40-2.35 (1H, m, 12-H<sub>A</sub>), 2.23-2.16 (1H, m, 15-H<sub>A</sub>), 1.69-1.62 (1H, m, 15-H<sub>B</sub>), 1.27-1.19 (1H, m, 12-H<sub>B</sub>). **<sup>13</sup>C NMR** (125 MHz, CD<sub>3</sub>OD): δ 159.7 (quinoline 6-C), 151.1 (Ar-C<sub>q</sub>), 148.2 (quinoline 2-C), 145.7 (Ar-C<sub>q</sub>), 144.7 (Ar-C<sub>q</sub>), 144.6 (Ar-C<sub>q</sub>), 141.9 (indole 6-C), 131.3 (quinoline 8-C), 127.8 (Ar-C<sub>q</sub>), 126.3 (Ar-C<sub>q</sub>), 126.1 (Ar-C<sub>q</sub>), 125.5 (indole 4-C), 123.6 (quinoline 7-C), 119.4 (quinoline 3-C), 115.6 (Ar-C<sub>q</sub>), 101.9 (quinoline 5-C), 71.7 (CH(OH)), 66.9 (13-C), 56.5 (OCH<sub>3</sub>), 48.4 (14-C), 30.5 (15-C), 29.3 (11-C), 27.9 (12-C), 18.6 (Py-CH<sub>3</sub>). **HRMS** (ESI): C<sub>24</sub>H<sub>25</sub>O<sub>2</sub>N<sub>4</sub> [M+H]<sup>+</sup>; calculated: 401.1972, found: 401.1972.  $[\alpha]_{20}^D = +46$  (c. 0.1, MeOH).

**(R)-[[(11S,13S)-5-(4-Chlorophenyl)-1,7,9-triazatetracyclo[9.2.2.0<sup>2,10</sup>.0<sup>3,8</sup>]]pentadeca-2(10),3(8),4,6-tetraen-13-yl](6-methoxyquinolin-4-yl)methanol trifluoroacetate **10w-c****

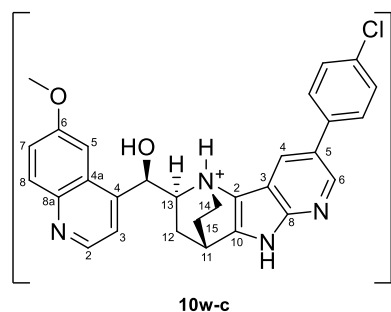

Prepared according to General Procedure B using ketone **6** and 20 mol% Pd(OAc)<sub>2</sub> (48 h). Flash column chromatography eluting with 5-35% {50:80:1 CH<sub>2</sub>Cl<sub>2</sub>:EtOH:NH<sub>4</sub>OH} in CH<sub>2</sub>Cl<sub>2</sub> gave 71 mg of partially purified material (63:37 mixture of target product:starting ketone<sup>†††</sup> containing 0.10 mmol product, 33% yield). Further purification by mass-directed

HPLC (MeCN in H<sub>2</sub>O + 0.1% TFA) gave the *title compound* **10w-c** (18 mg, 29 μmol, 9%) as a colourless solid. **<sup>1</sup>H NMR** (500 MHz, CD<sub>3</sub>OD, NH<sup>+</sup>, NH and OH not observed): δ 8.95 (1H, d, *J* 5.5, quinoline 2-H), 8.52 (1H, d, *J* 2.1, indole 6-H), 8.46 (1H, d, *J* 2.1, indole 4-H), 8.27 (1H, d, *J* 5.5, quinoline 3-H), 8.09 (1H, d, *J* 9.3, quinoline 8-H), 7.76 (1H, d, *J* 2.6, quinoline 5-H), 7.69-7.62 (3H, m, quinoline 7-H and phenyl 2-H or 3-H), 7.51 (2H, d, *J* 8.4, phenyl 2-H or 3-H), 6.69 (1H, app. s, CH(OH)), 4.87-4.81 (1H, m, 14-H<sub>A</sub><sup>§§§</sup>), 4.05 (3H, s, OCH<sub>3</sub>), 3.86-3.83 (1H, m, 11-H), 3.81 (1H, dd, *J* 10.5, 6.7, 13-H), 3.39-3.33 (1H, m, 14-H<sub>B</sub><sup>\*\*\*\*</sup>), 2.70 (1H, ddd, *J* 12.3, 6.6, 2.3, 12-H<sub>A</sub>), 2.58-2.51 (1H, m, 15-H<sub>A</sub>), 2.07-1.98 (1H, m, 15-H<sub>B</sub>), 1.57-1.50 (1H, m, 12-H<sub>B</sub>). **<sup>13</sup>C NMR** (125 MHz, CD<sub>3</sub>OD, CF<sub>3</sub>CO<sub>2</sub><sup>-</sup> not observed): δ 161.9 (quinoline 6-C), 146.5 (Ar-C<sub>q</sub>), 143.5 (quinoline 2-C), 142.7 (indole 6-C), 142.5 (Ar-C<sub>q</sub>), 138.6 (Ar-C<sub>q</sub>), 134.9 (Ar-C<sub>q</sub>), 131.1 (Ar-C<sub>q</sub>), 130.3 (phenyl 2-C or 3-C), 129.6 (phenyl 2-C or 3-C), 128.7 (Ar-C<sub>q</sub>), 128.0 (quinoline 7-C), 126.0 (quinoline 8-C), 124.3 (indole 4-C), 120.7 (quinoline 3-C), 117.0 (Ar-C<sub>q</sub>), 112.2 (Ar-C<sub>q</sub>), 102.6 (quinoline 5-C), 69.3 (13-C), 68.0 (CH(OH)), 57.3 (OCH<sub>3</sub>), 51.3 (14-C), 28.8 (11-C), 27.1 (15-C), 24.9 (12-C). **HRMS** (ESI): C<sub>29</sub>H<sub>26</sub>O<sub>2</sub>N<sub>4</sub><sup>35</sup>Cl [M+H]<sup>+</sup>; calculated: 497.1739, found: 497.1734. [α]<sub>20</sub><sup>D</sup> = +189 (c. 0.1, MeOH).

<sup>†††</sup> As judged by analysis of the partially purified reaction product by <sup>1</sup>H NMR spectroscopy at 300 MHz.

<sup>§§§</sup> Inferred from HSQC analysis.

<sup>\*\*\*\*</sup> Inferred from HSQC analysis.

**(1*R*,11*S*,13*S*)-13-[(*R*)-Hydroxy(6-methoxyquinolin-4-yl)methyl]-5-(trifluoromethyl)-1,7,9-triazatetracyclo[9.2.2.0<sup>2,10</sup>.0<sup>3,8</sup>]pentadeca-2(10),3(8),4,6-tetraen-1-ium trifluoroacetate **10w-d****

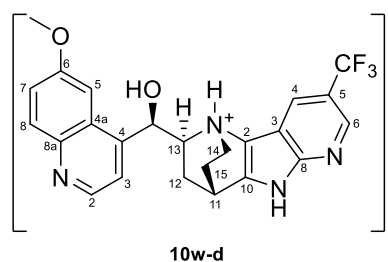

Prepared according to General Procedure B using ketone **6**, MgSO<sub>4</sub> (1.5 eq.) and 20 mol% Pd(OAc)<sub>2</sub> (48 h). Flash column chromatography eluting with 5-20% {50:80:1 CH<sub>2</sub>Cl<sub>2</sub>:EtOH:NH<sub>4</sub>OH} in CH<sub>2</sub>Cl<sub>2</sub> gave 51 mg of partially purified material (61:39 mixture of target product:starting ketone<sup>††††</sup> containing 76 μmol product, 24% yield). Further purification by mass-directed HPLC (MeCN in H<sub>2</sub>O + 0.1% TFA) gave the *title compound* **10w-d** (18 mg, 32 μmol, 10%). **<sup>1</sup>H NMR** (500 MHz, CD<sub>3</sub>OD, NH<sup>+</sup>, NH and OH not observed): δ 8.97 (1H, d, *J* 5.7, quinoline 2-H), 8.56-8.51 (2H, m, indole 4-H and 6-H), 8.31 (1H, d, *J* 5.7, quinoline 3-H), 8.10 (1H, d, *J* 9.3, quinolone 8-H), 7.76 (1H, d, *J* 2.5, quinoline 5-H), 7.69 (1H, dd, *J* 9.3, 2.5, quinoline 7-H), 6.73 (1H, app. s, CH(OH)), 4.84-4.79 (1H, m, 14-H<sub>A</sub>), 3.87-3.83 (1H, m, 11-H), 3.78 (1H, dd, *J* 10.4, 6.8, 13-H), 3.37-3.35 (1H, m, 14-H<sub>B</sub>), 2.67 (1H, ddd, *J* 12.4, 6.7, 2.2, 12-H<sub>A</sub>), 2.57-2.47 (1H, m, 15-H<sub>A</sub>), 2.07-1.96 (2H, m, 15-H<sub>B</sub>), 1.53-1.44 (1H, m, 12-H<sub>B</sub>). **<sup>13</sup>C NMR** (125 MHz, CD<sub>3</sub>OD): δ 163.1 (q, *J* 35.8, CF<sub>3</sub>CO<sub>2</sub><sup>-</sup>), 162.1 (quinoline 6-C), 156.6 (Ar-C<sub>q</sub>), 148.5 (Ar-C<sub>q</sub>), 144.3 (Ar-C<sub>q</sub>), 143.1 (quinoline 2-C), 140.7 (q, *J* 3.7, indole 6-C), 136.9 (Ar-C<sub>q</sub>), 128.8 (Ar-C<sub>q</sub>), 128.5 (quinoline 7-C), 126.0 (q, *J* 269.8, ArCF<sub>3</sub>), 125.4 (quinoline 8-C), 123.7 (q, *J* 3.7, indole 4-C), 121.5 (q, *J* 32.4, indole 5-C), 120.7 (quinoline 3-C), 118.0 (q, *J* 291.3, CF<sub>3</sub>CO<sub>2</sub><sup>-</sup>), 117.4 (Ar-C<sub>q</sub>), 111.1 (Ar-C<sub>q</sub>), 102.5 (quinoline 5-C), 69.2 (13-C), 68.0 (CH(OH)), 57.4 (OCH<sub>3</sub>), 50.9 (14-C), 28.8 (11-C), 27.0 (15-C), 24.7 (12-C). **HRMS** (ESI): C<sub>24</sub>H<sub>22</sub>O<sub>2</sub>N<sub>4</sub>F<sub>3</sub> [M+H]<sup>+</sup>; calculated: 455.1689, found: 455.1685. [α]<sub>20</sub><sup>D</sup> = +17 (c. 0.1, MeOH).

<sup>††††</sup> As judged by analysis of the partially purified reaction product by <sup>1</sup>H NMR spectroscopy at 300 MHz.

**(1*R*,11*S*,13*S*)-13-[(*R*)-Hydroxy(6-methoxyquinolin-4-yl)methyl]-5-nitro-1,7,9-triazatetracyclo[9.2.2.0<sup>2,10</sup>.0<sup>3,8</sup>]pentadeca-2(10),3(8),4,6-tetraen-1-ium trifluoroacetate 10w-e**

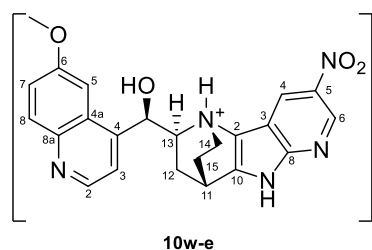

•CF<sub>3</sub>CO<sub>2</sub><sup>-</sup> Prepared according to General Procedure B using ketone **6**, MgSO<sub>4</sub> (1.5 eq.) and 30 mol% Pd(OAc)<sub>2</sub> (72 h). Purification by mass-directed HPLC (MeCN in H<sub>2</sub>O + 0.1% TFA) gave the *title compound 10w-e* (18 mg, 33 μmol, 10%). **<sup>1</sup>H NMR** (700 MHz, CD<sub>3</sub>OD, NH<sup>+</sup>, NH and OH not observed): δ 9.14 (1H, d, *J* 2.5,

indole 6-H), 9.06 (1H, d, *J* 2.5, indole 4-H), 8.96 (1H, d, *J* 5.6, quinoline 2-H), 8.28 (1H, d, *J* 5.6, quinoline 3-H), 8.10 (1H, d, *J* 9.3, quinoline 8-H), 7.78 (1H, d, *J* 2.6, quinoline 5-H), 7.70 (1H, dd, *J* 9.3, 2.5, quinoline 7-H), 6.69-6.62 (1H, m, CH(OH)), 4.81-4.75 (1H, m, 14-H<sub>A</sub>), 4.11 (3H, s, OCH<sub>3</sub>), 3.86-3.82 (1H, m, 11-H), 3.78-3.73 (1H, m, 13-H), 3.30-3.24 (1H, m, 14-H<sub>B</sub>), 2.69 (1H, ddd, *J* 12.4, 6.6, 2.3, 12-H<sub>A</sub>), 2.55-2.49 (1H, m, 15-H<sub>A</sub>), 2.05-1.98 (1H, m, 15-H<sub>B</sub>), 1.56-1.49 (1H, m, 12-H<sub>B</sub>). **<sup>13</sup>C NMR** (175 MHz, CD<sub>3</sub>OD, CF<sub>3</sub>CO<sub>2</sub><sup>-</sup> not observed): δ 162.0 (2 peaks, 2 × Ar-C<sub>q</sub>), 149.1 (Ar-C<sub>q</sub>), 146.2 (Ar-C<sub>q</sub>), 143.3 (quinoline 2-C), 141.3 (Ar-C<sub>q</sub>), 139.9 (indole 6-C), 137.1 (Ar-C<sub>q</sub>), 128.8 (2 peaks, 2 × Ar-C<sub>q</sub>), 128.3 (quinoline 7-C), 125.6 (quinoline 8-C), 122.0 (indole 4-C), 120.7 (quinoline 3-C), 117.7 (CF<sub>3</sub>CO<sub>2</sub><sup>-</sup>), 111.4 (Ar-C<sub>q</sub>), 102.7 (quinoline 5-C), 68.9 (13-C), 68.4 (CH(OH)), 57.5 (OCH<sub>3</sub>), 50.8 (14-C), 29.0 (11-C), 27.3 (15-C), 25.2 (12-C). **HRMS** (ESI): C<sub>23</sub>H<sub>22</sub>O<sub>4</sub>N<sub>5</sub> [M+H]<sup>+</sup>; calculated: 432.1666, found: 432.1661. [α]<sub>D</sub><sup>20</sup> = +59 (c. 0.1, MeOH).

**(1*R*,11*S*,13*S*)-5-Fluoro-13-[(*R*)-hydroxy(6-methoxyquinolin-4-yl)methyl]-1,7,9-triazatetracyclo[9.2.2.0<sup>2,10</sup>.0<sup>3,8</sup>]pentadeca-2(10),3(8),4,6-tetraen-1-ium trifluoroacetate **10w-f****

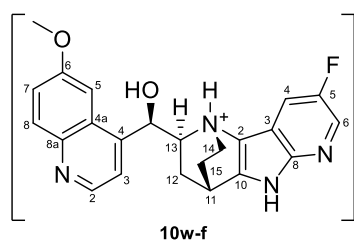

•CF<sub>3</sub>CO<sub>2</sub><sup>-</sup> Prepared according to General Procedure B using ketone **6** and 30 mol% Pd(OAc)<sub>2</sub> (72 h). Flash column chromatography eluting with 1:9 to 1:4 ({50:80:1 CH<sub>2</sub>Cl<sub>2</sub>:EtOH:NH<sub>4</sub>OH}/CH<sub>2</sub>Cl<sub>2</sub>) followed by mass-directed preparative HPLC (MeCN in H<sub>2</sub>O + 0.1% TFA; Rt = 6 min) gave the *title compound* **10w-f** (23 mg, 44 μmol, 14%)

as a yellow solid. **<sup>1</sup>H NMR** (500 MHz, CD<sub>3</sub>OD, NH<sup>+</sup>, NH and OH not observed): δ 8.90 (1H, d, *J* 5.4, quinoline 2-H), 8.18 (1H, d, *J* 9.1, indole 6-H), 8.16 (1H, d, *J* 9.3, quinoline 8-H), 7.93 (1H, d, *J* 5.4, quinoline 3-H), 7.76 (1H, dd, *J* 9.3, 2.4, quinoline 7-H), 7.59 (1H, d, *J* 2.4, quinoline 5-H), 7.56 (1H, dd, *J* 9.1, 2.4, indole 4-H), 5.87 (1H, d, *J* 4.1, CH(OH)), 4.53-4.46 (1H, m, 13-H), 3.99-3.95 (1H, m, 14-H<sub>A</sub>), 3.94 (3H, s, OCH<sub>3</sub>), 3.82-3.77 (1H, m, 11-H), 3.20-3.13 (1H, m, 14-H<sub>B</sub>), 2.27-2.18 (1H, m, 15-H<sub>A</sub>), 2.14-2.03 (2H, m, 12-H<sub>A</sub> and 12-H<sub>B</sub>), 1.91-1.84 (1H, m, 15-H<sub>B</sub>). **<sup>13</sup>C NMR** (125 MHz, CD<sub>3</sub>OD): δ 162.72 (q, *J*<sub>CF</sub> 38.6, CF<sub>3</sub>CO<sub>2</sub><sup>-</sup>) 161.6 (quinoline 6-C), 157.4 (d, *J*<sub>CF</sub> 242.1, indole 5-C), 155.0 (Ar-C<sub>q</sub>), 144.1 (Ar-C<sub>q</sub>), 143.7 (Ar-C<sub>q</sub>), 143.4 (quinoline 2-C), 137.9 (Ar-C<sub>q</sub>), 131.8 (d, *J*<sub>CF</sub> 30.0, indole 6-C), 131.7 (Ar-C<sub>q</sub>), 129.0 (Ar-C<sub>q</sub>), 127.8 (quinoline 7-C), 126.1 (quinoline 8-C), 121.6 (quinoline 3-C), 120.1 (q, *J*<sub>CF</sub> 265.6, CF<sub>3</sub>CO<sub>2</sub><sup>-</sup>), 113.3 (Ar-C<sub>q</sub>), 112.11 (d, *J*<sub>CF</sub> 23.1, indole 4-C), 103.3 (quinoline 5-C), 69.4 (CH(OH)), 66.9 (13-C), 56.9 (OCH<sub>3</sub>), 56.7 (14-C), 29.7 (12-C), 28.7 (11-C), 25.1 (15-C). **HRMS** (ESI): C<sub>23</sub>H<sub>22</sub>O<sub>2</sub>N<sub>4</sub>F [M+H]<sup>+</sup>; calculated: 405.1721, found: 405.1723. [ $\alpha$ ]<sub>20</sub><sup>D</sup> = +83 (c. 0.1, MeOH).



**(R)-[[(11S,13S)-5-Chloro-1,7,9-triazatetracyclo[9.2.2.0<sup>2,10</sup>.0<sup>3,8</sup>]]pentadeca-2(10),3(8),4,6-tetraen-13-yl](6-methoxyquinolin-4-yl)methanol 10w-g**

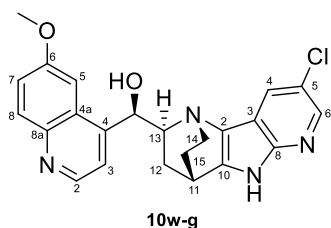

Prepared according to General Procedure B using ketone **6** and 20 mol% Pd(OAc)<sub>2</sub> (72 h). Flash column chromatography eluting with 5-20% {50:80:1 CH<sub>2</sub>Cl<sub>2</sub>:EtOH:NH<sub>4</sub>OH} in CH<sub>2</sub>Cl<sub>2</sub> gave the *title compound* **10w-g** (71 mg, 0.17 mmol, 53%). <sup>1</sup>H NMR (400 MHz, CD<sub>3</sub>OD, NH and OH not observed): δ 8.59 (1H, d, *J* 4.7, quinoline 2-H), 7.97-7.92 (2H, m, indole 4-H and 6-H), 7.76 (1H, d, *J* 9.2, quinoline 8-H), 7.70 (1H, d, *J* 4.7, quinoline 3-H), 7.33 (1H, d, *J* 2.7, quinoline 5-H), 7.18 (1H, dd, *J* 9.2, 2.6, quinoline 7-H), 5.92 (1H, s, CH(OH)), 4.15 (1H, ddd, *J* 12.8, 8.7, 4.1, 14-H<sub>A</sub>), 3.91 (3H, s, OCH<sub>3</sub>), 3.41-3.37 (1H, m, 11-H), 3.01-2.96 (1H, m, 13-H), 2.60-2.52 (1H, m, 14-H<sub>B</sub>), 2.33 (1H, ddd, *J* 12.3, 6.7, 2.1, 12-H<sub>A</sub>), 2.19-2.10 (1H, m, 15-H<sub>A</sub>), 1.64-1.55 (1H, m, 15-H<sub>B</sub>), 1.27-1.16 (1H, m, 12-H<sub>B</sub>). <sup>13</sup>C NMR (175 MHz, CD<sub>3</sub>OD):

δ 159.6 (quinolone 6-C), 150.8 (Ar-C<sub>q</sub>), 148.1 (quinoline 2-C), 146.9 (Ar-C<sub>q</sub>), 145.5 (Ar-C<sub>q</sub>), 144.5 (Ar-C<sub>q</sub>), 139.7 (indole 6-C), 131.2 (quinoline 8-C), 127.8 (Ar-C<sub>q</sub>), 126.1 (Ar-C<sub>q</sub>), 125.0 (Ar-C<sub>q</sub>), 124.3 (indole 4-C), 123.4 (quinoline 7-C), 119.4 (quinoline 3-C), 116.1 (Ar-C<sub>q</sub>), 101.9 (quinolone 5-C), 71.6 (CH(OH)), 66.8 (13-C), 56.5 (OCH<sub>3</sub>), 48.2 (14-C), 30.4 (15-C), 29.4 (11-C), 27.8 (12-C). **HRMS** (ESI): C<sub>23</sub>H<sub>22</sub>O<sub>2</sub>N<sub>4</sub><sup>35</sup>Cl [M+H]<sup>+</sup>; calculated: 421.1426, found: 421.1423. [α]<sub>20</sub><sup>D</sup> = +74 (c. 0.1, MeOH).

**(1*R*,11*S*,13*S*)-5-Bromo-13-[(*R*)-hydroxy(6-methoxyquinolin-4-yl)methyl]-1,7,9-triazatetracyclo[9.2.2.0<sup>2,10</sup>.0<sup>3,8</sup>]pentadeca-2(10),3(8),4,6-tetraen-1-ium trifluoroacetate 10w-h**

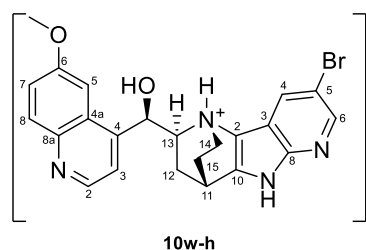

Prepared according to General Procedure B using ketone **6**, MgSO<sub>4</sub> (1.5 eq.) and 30 mol% Pd(OAc)<sub>2</sub> (72 h). Flash column chromatography eluting with 5-20% {50:80:1 CH<sub>2</sub>Cl<sub>2</sub>:EtOH:NH<sub>4</sub>OH} in CH<sub>2</sub>Cl<sub>2</sub> gave 43 mg of partially purified material (56:54 mixture of target product:starting ketone<sup>###</sup>

containing 56 μmol product, 17% yield). Further purification by mass-directed HPLC (MeCN in H<sub>2</sub>O + 0.1% TFA) gave the *title compound* **10w-h** (19 mg, 33 μmol, 10%). **<sup>1</sup>H NMR** (700 MHz, CD<sub>3</sub>OD, NH<sup>+</sup>, NH and OH not observed): δ 8.97 (1H, d, *J* 5.7, quinoline 2-H), 8.36 (1H, d, *J* 2.2, indole 4-H), 8.32 (1H, d, *J* 5.7, quinoline 3-H), 8.27 (1H, d, *J* 2.2, indole 6-H), 8.11 (1H, d, *J* 9.3, quinoline 8-H), 7.77 (1H, d, *J* 2.5, quinoline 5-H), 7.71 (1H, dd, *J* 9.3, 2.5, quinoline 7-H), 6.71 (1H, s, CH(OH)), 4.79 (1H, ddd, *J* 11.8, 9.3, 4.3, 14-H<sub>A</sub>), 4.09 (3H, s, OCH<sub>3</sub>), 3.82-3.78 (1H, m, 11-H), 3.79-3.73 (1H, m, 13-H), 3.33-3.30 (1H, m, 14-H<sub>B</sub>), 2.65 (1H, ddd, *J* 12.3, 6.7, 2.4, 12-H<sub>A</sub>), 2.53-2.47 (1H, m, 15-H<sub>A</sub>), 2.02-1.96 (1H, m, 15-H<sub>B</sub>), 1.50-1.44 (1H, m, 12-H<sub>B</sub>). **<sup>13</sup>C NMR** (175 MHz, CD<sub>3</sub>OD): δ 162.3 (quinolone 6-C), 162.2 (q, *J* 36.7, CF<sub>3</sub>CO<sub>2</sub><sup>-</sup>), 157.6 (Ar-C<sub>q</sub>), 145.6 (Ar-C<sub>q</sub>), 144.5 (indole 6-C), 143.2 (Ar-C<sub>q</sub>), 142.5 (quinoline 2-C), 135.9 (Ar-C<sub>q</sub>), 129.03 (quinoline 7-C), 129.0 (Ar-C<sub>q</sub>), 128.3 (indole 4-C), 124.7 (quinoline 8-C), 120.8 (quinoline 3-C), 117.6 (q, *J* 289.3, CF<sub>3</sub>CO<sub>2</sub><sup>-</sup>), 115.9 (Ar-C<sub>q</sub>), 114.0 (Ar-C<sub>q</sub>), 113.3 (Ar-C<sub>q</sub>), 102.7 (quinoline 5-C), 69.1 (13-C), 67.9 (CH(OH)), 57.5 (OCH<sub>3</sub>), 51.2 (14-C), 28.7 (11-C), 26.9 (15-C), 24.7 (12-C). **HRMS** (ESI): C<sub>23</sub>H<sub>22</sub>O<sub>2</sub>N<sub>4</sub><sup>79</sup>Br [M+H]<sup>+</sup>; calculated: 465.0921, found: 465.0918; C<sub>23</sub>H<sub>22</sub>O<sub>2</sub>N<sub>4</sub><sup>81</sup>Br [M+H]<sup>+</sup>; calculated: 467.0900, found: 467.0898. [ $\alpha$ ]<sub>20</sub><sup>D</sup> = +59 (c. 0.1, MeOH).

<sup>###</sup> As judged by analysis of the partially purified reaction product by <sup>1</sup>H NMR spectroscopy at 300 MHz.

**(R)-[[(11S,13S)-5-Iodo-1,7,9-triazatetracyclo[9.2.2.0<sup>2,10</sup>.0<sup>3,8</sup>]]pentadeca-2(10),3(8),4,6-tetraen-13-yl][6-methoxyquinolin-4-yl)methanol 10w-i**

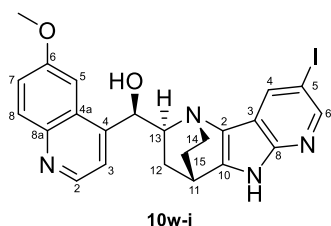

Prepared according to General Procedure B using ketone **6**, MgSO<sub>4</sub> (1.5 eq.) and 30 mol% Pd(OAc)<sub>2</sub> (72 h). Flash column chromatography eluting with 5-20% {50:80:1 CH<sub>2</sub>Cl<sub>2</sub>:EtOH:NH<sub>4</sub>OH} in CH<sub>2</sub>Cl<sub>2</sub> gave the *title compound* **10w-i** (9 mg, 18 μmol, 5%). **<sup>1</sup>H NMR** (700 MHz, CD<sub>3</sub>OD, NH and OH not observed): δ 9.14 (1H, d, *J* 2.5, indole 6-H), 9.06 (1H, d, *J* 2.5,

indole 4-H), 8.96 (1H, d, *J* 5.6, quinoline 2-H), 8.28 (1H, d, *J* 5.6, quinoline 3-H), 8.10 (1H, d, *J* 9.3, quinoline 8-H), 7.78 (1H, d, *J* 2.6, quinoline 5-H), 7.70 (1H, dd, *J* 9.3, 2.5, quinoline 7-H), 6.65 (1H, br. s, CH(OH)), 4.80-4.74 (1H, m, 14-H<sub>A</sub>), 4.11 (3H, s, OCH<sub>3</sub>), 3.86-3.81 (1H, m, 11-H), 3.79-3.73 (1H, m, 13-H), 3.30-3.26 (1H, m, 14-H<sub>B</sub>), 2.69 (1H, ddd, *J* 12.4, 6.6, 2.3, 12-H<sub>A</sub>), 2.58-2.47 (1H, m, 15-H<sub>A</sub>), 2.04-1.98 (1H, m, 15-H<sub>B</sub>), 1.56-1.47 (1H, m, 12-H<sub>B</sub>). **<sup>13</sup>C NMR** (175 MHz, CD<sub>3</sub>OD, 1 × Ar-C<sub>q</sub> not observed): δ 162.0 (quinoline 6-C), 149.1 (Ar-C<sub>q</sub>), 146.2 (Ar-C<sub>q</sub>), 143.3 (quinoline 2-C), 141.3 (Ar-C<sub>q</sub>), 139.9 (indole 6-H), 137.1 (Ar-C<sub>q</sub>), 128.8 (Ar-C<sub>q</sub>), 128.3 (2 peaks, quinoline 7-C and Ar-C<sub>q</sub>), 125.6 (quinoline 8-C), 122.0 (indole 4-C), 120.7 (quinoline 3-C), 111.4 (Ar-C<sub>q</sub>), 102.7 (quinoline 5-C), 68.9 (13-C), 68.4 (CH(OH)), 57.5 (OCH<sub>3</sub>), 50.8 (14-C), 29.0 (11-C), 27.3 (15-C), 25.2 (12-C). **HRMS** (ESI): C<sub>23</sub>H<sub>22</sub>O<sub>2</sub>N<sub>4</sub>I [M+H]<sup>+</sup>; calculated: 513.0782, found: 513.0779. [α]<sub>20</sub><sup>D</sup> = +179 (c. 0.1, MeOH).

**(R)-[(11S,13S)-5-Bromo-6-methyl-1,7,9-triazatetracyclo[9.2.2.0<sup>2,10</sup>.0<sup>3,8</sup>]pentadeca-2(10),3(8),4,6-tetraen-13-yl](6-methoxyquinolin-4-yl)methanol 10w-j**

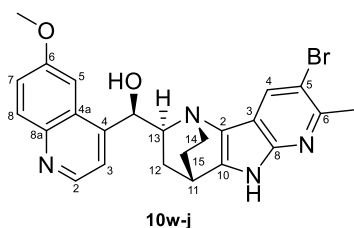

**Method A:** Prepared according to General Procedure B using ketone **6** and 20 mol% Pd(OAc)<sub>2</sub> (48 h). Flash column chromatography eluting with 5-35% {50:80:1 CH<sub>2</sub>Cl<sub>2</sub>:EtOH:NH<sub>4</sub>OH} in CH<sub>2</sub>Cl<sub>2</sub> gave the *title compound 10w-j* (29 mg, 60 μmol, 19%). **Method B:** Prepared according to General Procedure B using ketone **6**, MgSO<sub>4</sub> (1.5 eq.) and 20 mol%

Pd(OAc)<sub>2</sub> (48 h). Flash column chromatography eluting with 5-20% {50:80:1 CH<sub>2</sub>Cl<sub>2</sub>:EtOH:NH<sub>4</sub>OH} in CH<sub>2</sub>Cl<sub>2</sub> gave the *title compound 10w-j* (59 mg, 122 μmol, 38%). This material was subjected to mass-directed HPLC to give the *title compound* (51 mg, 86 μmol, 27%) as the TFA salt, which was a yellow oil. **<sup>1</sup>H NMR** (700 MHz, CD<sub>3</sub>OD, free base form, NH and OH not observed): δ 8.65 (1H, d, *J* 4.6, quinoline 2-H), 8.14 (1H, s, indole 4-H), 7.87 (1H, d, *J* 9.3, quinoline 8-H), 7.75 (1H, d, *J* 4.6, quinoline 3-H), 7.40 (1H, s, quinoline 5-H), 7.32 (1H, d, *J* 9.3, quinoline 7-H), 5.96 (1H, s, CH(OH)), 4.22-4.17 (1H, m, 14-H<sub>A</sub>), 3.99 (3H, s, OCH<sub>3</sub>), 3.47-3.42 (1H, m, 11-H), 3.05-3.00 (1H, m, 13-H), 2.66-2.59 (4H, m, includes 14-H<sub>B</sub> and at δ 2.62: 3H, s, ArCH<sub>3</sub>), 2.37 (1H, dd, *J* 12.1, 6.5, 12-H<sub>A</sub>), 2.22-2.17 (1H, m, 15-H<sub>A</sub>), 1.70-1.63 (1H, m, 15-H<sub>B</sub>), 1.26-1.20 (1H, m, 12-H<sub>B</sub>). **<sup>13</sup>C NMR** (175 MHz, CD<sub>3</sub>OD, free base form): δ 159.7 (quinoline 6-C), 151.0 (Ar-C<sub>q</sub>), 148.2 (quinoline 2-C), 148.1 (Ar-C<sub>q</sub>), 145.8 (Ar-C<sub>q</sub>), 145.4 (Ar-C<sub>q</sub>), 144.7 (Ar-C<sub>q</sub>), 131.6 (quinoline 8-C), 128.7 (indole 4-C), 127.8 (Ar-C<sub>q</sub>), 125.8 (Ar-C<sub>q</sub>), 123.6 (quinoline 7-C), 119.4 (quinoline 3-C), 115.3 (Ar-C<sub>q</sub>), 113.6 (Ar-C<sub>q</sub>), 102.0 (quinoline 5-C), 71.7 (CH(OH)), 66.9 (13-C), 56.5 (OCH<sub>3</sub>), 48.2 (14-C), 30.5 (15-C), 29.4 (11-C), 27.8 (12-C), 24.7 (ArCH<sub>3</sub>). **HRMS** (ESI): C<sub>24</sub>H<sub>24</sub>O<sub>2</sub>N<sub>4</sub><sup>79</sup>Br [M+H]<sup>+</sup>; calculated: 479.1077, found: 479.1074; C<sub>24</sub>H<sub>24</sub>O<sub>2</sub>N<sub>4</sub><sup>81</sup>Br [M+H]<sup>+</sup>; calculated: 481.1057, found: 481.1053.  $[\alpha]_{20}^D = +78$  (c. 0.1, MeOH).

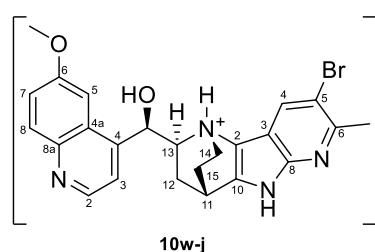

**<sup>1</sup>H NMR** (500 MHz, CD<sub>3</sub>OD, TFA salt form, NH<sup>+</sup>, NH and OH not observed): δ 8.93 (1H, d, *J* 5.7, quinoline 2-H), 8.31 (1H, s, indole 4-H), 8.27 (1H, d, *J* 5.7, quinoline 3-H), 8.07 (1H, d, *J* 9.3, quinoline 8-H), 7.72 (1H, d, *J* 2.6, quinoline 5-H), 7.68 (1H, dd, *J* 9.3, 2.6, quinoline 7-H), 6.65 (1H, s, CH(OH)), 4.75 (1H, ddd, *J* 11.8, 9.3, 4.3, 14-H<sub>A</sub>), 4.06 (3H, s, OCH<sub>3</sub>), 3.78-3.66 (2H, m, 11-H and 13-H), 3.32-3.22 (14-H<sub>B</sub>)<sup>§</sup>, 2.64-2.58 (4H, m, includes 12-H<sub>A</sub>, and at δ 2.62: 3H, s, ArCH<sub>3</sub>), 2.49-2.42 (1H, m, 15-H<sub>A</sub>), 2.00-1.89 (1H, m, 15-H<sub>B</sub>), 1.47-1.38 (1H, m, 12-H<sub>B</sub>). **<sup>13</sup>C NMR** (175 MHz, CD<sub>3</sub>OD, TFA salt form, one Ar-C<sub>q</sub> not observed): δ 160.9 (q, *J* 36.5, CF<sub>3</sub>CO<sub>2</sub><sup>-</sup>), 160.8 (quinoline 6-C), 155.9 (Ar-C<sub>q</sub>), 149.8 (Ar-C<sub>q</sub>), 144.2 (Ar-C<sub>q</sub>), 141.2 (quinoline 2-C), 140.6 (Ar-C<sub>q</sub>), 134.8 (Ar-C<sub>q</sub>), 128.1 (indole 4-C),

<sup>§</sup> Inferred from HSQC analysis.

127.5 (quinoline 7-C), 123.5 (quinoline 8-C), 119.4 (quinoline 3-C), 116.3 (q, *J* 290, CF<sub>3</sub>CO<sub>2</sub><sup>-</sup>), 114.2 (Ar-C<sub>q</sub>), 113.5 (Ar-C<sub>q</sub>), 110.2 (Ar-C<sub>q</sub>), 101.3 (quinoline 5-C), 67.8 (13-C), 66.5 (CH(OH)), 56.1 (OCH<sub>3</sub>), 49.8 (14-C), 27.3 (11-C), 25.6 (15-C), 23.7 (ArCH<sub>3</sub>), 23.3 (12-C).

**(1*R*,11*S*,13*S*)-13-[(*R*)-Hydroxy(6-methoxyquinolin-4-yl)methyl]-6-methyl-1,7,9-triaza-tetracyclo[9.2.2.0<sup>2,10</sup>.0<sup>3,8</sup>]pentadeca-2(10),3(8),4,6-tetraen-1-ium trifluoroacetate 10w-k**

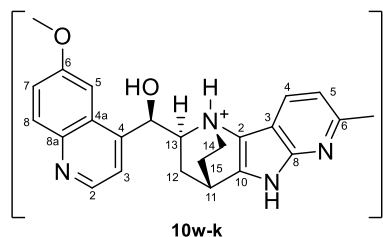

•CF<sub>3</sub>CO<sub>2</sub><sup>-</sup> Prepared according to General Procedure B using ketone **6** and 30 mol% Pd(OAc)<sub>2</sub> (72h). Flash column chromatography eluting with 1:9 to 1:4 ({50:80:1 CH<sub>2</sub>Cl<sub>2</sub>:EtOH:NH<sub>4</sub>OH}/CH<sub>2</sub>Cl<sub>2</sub>), followed by mass-directed preparative HPLC (MeCN in H<sub>2</sub>O + 0.1% TFA; Rt = 8.4 min) gave the *title compound* **10w-k** (5 mg,

10 μmol, 3%) as a yellow solid. **<sup>1</sup>H NMR** (700 MHz, CD<sub>3</sub>OD, NH<sup>+</sup>, NH and OH not observed): δ 8.84 (1H, d, *J* 5.2, quinoline 2-H), 8.09 (1H, d, *J* 8.2, quinoline 8-H), 8.05 (1H, d, *J* 5.2, quinoline 3-H), 8.02 (1H, d, *J* 8.8, indole 4-H), 7.60-7.56 (2H, m, quinoline 5-H and indole 5-H), 7.17 (1H, d, *J* 8.2, quinoline 7-H), 6.46 (1H, app. s, CH(OH)), 4.80-4.74 (1H, m, 14-H<sub>A</sub>), 4.03 (3H, s, OCH<sub>3</sub>), 3.80-3.77 (1H, m, 11-H), 3.72-3.67 (1H, m, 13-H), 3.27-3.20 (1H, m, 14-H<sub>B</sub>), 2.69-2.61 (1H, m, 12-H<sub>A</sub>), 2.59 (3H, s, Py-CH<sub>3</sub>), 2.51-2.45 (1H, m, 15-H<sub>A</sub>), 1.98-1.92 (1H, m, 15-H<sub>B</sub>), 1.52-1.47 (1H, m, 12-H<sub>B</sub>). **<sup>13</sup>C NMR** (125 MHz, CD<sub>3</sub>OD, CF<sub>3</sub>CO<sub>2</sub><sup>-</sup> not observed): δ 162.7 (q, *J*<sub>CF</sub> 35.5, CF<sub>3</sub>CO<sub>2</sub><sup>-</sup>), 161.1 (quinoline 6-C), 145.6 (quinoline 2-C), 140.7 (Ar-C<sub>q</sub>), 128.5 (Ar-C<sub>q</sub>), 128.1 (indole 4-C), 126.8 (quinoline 8-C), 126.0 (indole 6-C), 120.4 (quinoline 3-C), 118.8 (Ar-C<sub>q</sub>), 118.4 (quinoline 7-C), 117.2 (Ar-C<sub>q</sub>), 116.8 (Ar-C<sub>q</sub>), 110.0 (Ar-C<sub>q</sub>), 102.3 (quinoline 5-C), 69.5 (11-C), 68.3 (CH(OH)), 57.0 (OCH<sub>3</sub>), 51.5 (14-C), 28.6 (11-C), 27.3 (15-C), 25.3 (12-C), 23.6 (Py-CH<sub>3</sub>). **HRMS** (ESI): C<sub>24</sub>H<sub>25</sub>O<sub>2</sub>N<sub>4</sub> [M+H]<sup>+</sup>; calculated: 401.1972, found: 401.1972. [α]<sub>20</sub><sup>D</sup> = -48 (c. 0.1, MeOH).

**(1*R*,11*S*,13*S*)-6-Chloro-13-[(*R*)-hydroxy(6-methoxyquinolin-4-yl)methyl]-1,7,9-triazatetracyclo[9.2.2.0<sup>2,10</sup>.0<sup>3,8</sup>]pentadeca-2(10),3(8),4,6-tetraen-1-ium trifluoroacetate **10w-l****

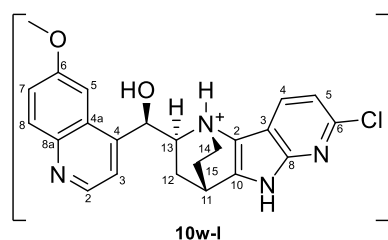

•CF<sub>3</sub>CO<sub>2</sub><sup>-</sup> Prepared according to General Procedure B using ketone **6** and 20 mol% Pd(OAc)<sub>2</sub> (48 h). Flash column chromatography eluting with 15-35% {50:80:1 CH<sub>2</sub>Cl<sub>2</sub>:EtOH:NH<sub>4</sub>OH} in CH<sub>2</sub>Cl<sub>2</sub> gave the *title compound 10w-l* (56 mg, 0.13 mmol, 41%, ~90% purity<sup>§§§§</sup>). Further purification of this material by mass-directed

HPLC (MeCN in H<sub>2</sub>O + 0.1% TFA) gave the *title compound 10w-l* (25 mg, 47 μmol, 15%) as the TFA salt. <sup>1</sup>H NMR (700 MHz, CD<sub>3</sub>OD, NH<sup>+</sup>, NH and OH not observed): δ 8.96 (1H, d, *J* 5.6, quinoline 2-H), 8.27 (1H, d, *J* 5.6, quinoline 3-H), 8.18 (1H, d, *J* 5.3, indole 4-H), 8.12 (1H, d, *J* 9.1, quinoline 8-H), 7.75-7.69 (2H, m, quinoline 5-H and 7-H), 7.31 (1H, d, *J* 5.3, indole 5-H), 6.78 (1H, s, CH(OH)), 4.82-4.76 (1H, m, 14-H<sub>A</sub>), 4.13 (3H, s, OCH<sub>3</sub>), 3.87-3.79 (2H, m, 11-H and 13H), 3.39-3.33 (1H, m, 14-H<sub>B</sub>), 2.73 (1H, ddd, *J* 12.7, 6.3, 2.6, 12-H<sub>A</sub>), 2.57-2.50 (1H, m, 15-H<sub>A</sub>), 2.04-1.97 (1H, m, 15-H<sub>B</sub>), 1.56-1.46 (1H, m, 12-H<sub>B</sub>). <sup>13</sup>C NMR (175 MHz, CD<sub>3</sub>OD, CF<sub>3</sub>CO<sub>2</sub><sup>-</sup> and 1 × Ar-C<sub>q</sub> not observed): δ 161.9 (quinoline 6-C), 147.5 (Ar-C<sub>q</sub>), 144.2 (indole 4-C), 143.4 (2 peaks, quinoline 2-C and Ar-C<sub>q</sub>), 137.2 (Ar-C<sub>q</sub>), 133.3 (Ar-C<sub>q</sub>), 128.8 (Ar-C<sub>q</sub>), 128.1 (quinoline 7-C), 125.8 (2 peaks, quinoline 8-C), 120.7 (quinoline 3-C), 118.6 (indole 5-C), 114.8 (Ar-C<sub>q</sub>), 111.8 (Ar-C<sub>q</sub>), 102.6 (quinoline 5-C), 70.2 (13-C), 67.9 (CH(OH)), 57.3 (OCH<sub>3</sub>), 53.0 (14-C), 28.4 (11-C), 26.4 (15-C), 25.2 (12-C). **HRMS** (ESI): C<sub>23</sub>H<sub>22</sub>O<sub>2</sub>N<sub>4</sub><sup>35</sup>Cl [M+H]<sup>+</sup>; calculated: 421.1426, found: 421.1422. [α]<sub>20</sub><sup>D</sup> = -25 (c. 0.1, MeOH).

<sup>§§§§</sup> As judged by analysis of the product by <sup>1</sup>H NMR spectroscopy at 300 MHz.

### 6.3.2.5 Preparation of compounds to investigate the minimum necessary pharmacophore

#### 6.3.2.5.1 Preparation of compound S-1

##### (R)-[[(13S)-5-Bromo-6-methyl-1,9-diazatetracyclo[9.2.2.0<sup>2,10</sup>.0<sup>3,8</sup>]pentadeca-2(10),3,5,7-tetraen-13-yl][(6-methoxyquinolin-4-yl)methyl] S-1

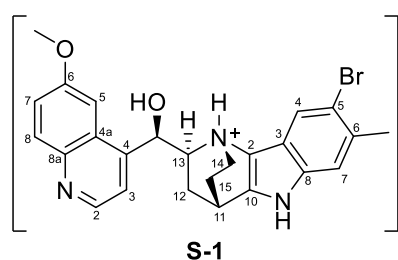

Prepared according to General Procedure B using ketone **6** and 20 mol% Pd(OAc)<sub>2</sub> (48 h). Flash column chromatography eluting with 20% {50:80:1 CH<sub>2</sub>Cl<sub>2</sub>:EtOH:NH<sub>4</sub>OH} in CH<sub>2</sub>Cl<sub>2</sub> followed by mass-directed preparative HPLC (MeCN in H<sub>2</sub>O + 0.1% TFA; Rt = 15.0 min) gave the *title compound S-1*

(36 mg, 75 μmol, 23%) as a yellow solid. **<sup>1</sup>H NMR** (700 MHz, CD<sub>3</sub>OD, NH<sup>+</sup>, NH and OH not observed) δ 8.89 (d, *J* 5.4, 1H, quinoline 2-H), 8.16 (d, *J* 5.4, 1H, quinoline 3-H), 8.05 (d, *J* 9.3, 1H, quinoline 8-H), 8.00 (s, 1H, indole 4-H), 7.66 (d, *J* 2.3, 1H, quinoline 5-H), 7.61 (dd, *J* 9.3, 2.3, 1H, quinoline 7-H), 7.36 (s, 1H, indole 7-H), 6.60 (s, 1H, app. s, CH(OH)), 4.82-4.77 (m, 1H, 14-H<sub>A</sub>), 4.09 (s, 3H, OCH<sub>3</sub>), 3.75 (s, 1H, app. s, 11-H), 3.70-3.65 (m, 1H, 13-H), 3.30-3.27 (m, 1H, 14-H<sub>B</sub>), 2.64-2.60 (m, 1H, 12-H<sub>A</sub>), 2.50-2.43 (m, 4H, CH<sub>3</sub> and 15-H<sub>A</sub>), 2.00-1.93 (m, 1H, 15-H<sub>B</sub>), 1.44-1.39 (m, 1H, 12-H<sub>B</sub>). **<sup>13</sup>C NMR** (176 MHz, CD<sub>3</sub>OD, CF<sub>3</sub>CO<sub>2</sub><sup>-</sup> not observed) δ 162.9 (q, *J*<sub>CF</sub> 35.8, CF<sub>3</sub>CO<sub>2</sub><sup>-</sup>), 161.6 (quinoline 6-C), 154.4 (Ar-C<sub>q</sub>), 144.3 (quinoline 2-C), 141.0 (Ar-C<sub>q</sub>), 138.7 (Ar-C<sub>q</sub>), 135.2 (Ar-C<sub>q</sub>), 132.3 (Ar-C<sub>q</sub>), 128.4 (Ar-C<sub>q</sub>), 127.4 (quinoline 7-C), 127.0 (quinoline 8-C), 120.4 (indole 4-C or quinoline 3-C), 120.3 (indole 4-C or quinoline 3-C), 118.5 (Ar-C<sub>q</sub>), 118.3 (Ar-C<sub>q</sub>), 117.1 (Ar-C<sub>q</sub>), 114.9 (indole 7-C), 102.3 (quinoline 5-C), 69.8 (13-C), 68.0 (CH(OH)), 57.2 (OCH<sub>3</sub>), 51.3 (14-C), 28.9 (11-C), 27.1 (15-C), 24.8 (12-C), 23.6 (CH<sub>3</sub>). **HRMS** (ESI); C<sub>25</sub>H<sub>24</sub>O<sub>2</sub>N<sub>3</sub><sup>79</sup>Br [M+H]<sup>+</sup>; calculated: 478.1125, found: 478.1122; C<sub>25</sub>H<sub>24</sub>O<sub>2</sub>N<sub>3</sub><sup>81</sup>Br [M+H]<sup>+</sup>; calculated: 480.1104, found: 478.1100. [α]<sub>D</sub><sup>20</sup> -10 (c. 0.1, MeOH).



## 6.3.2.5.2 Preparation of compound S-2

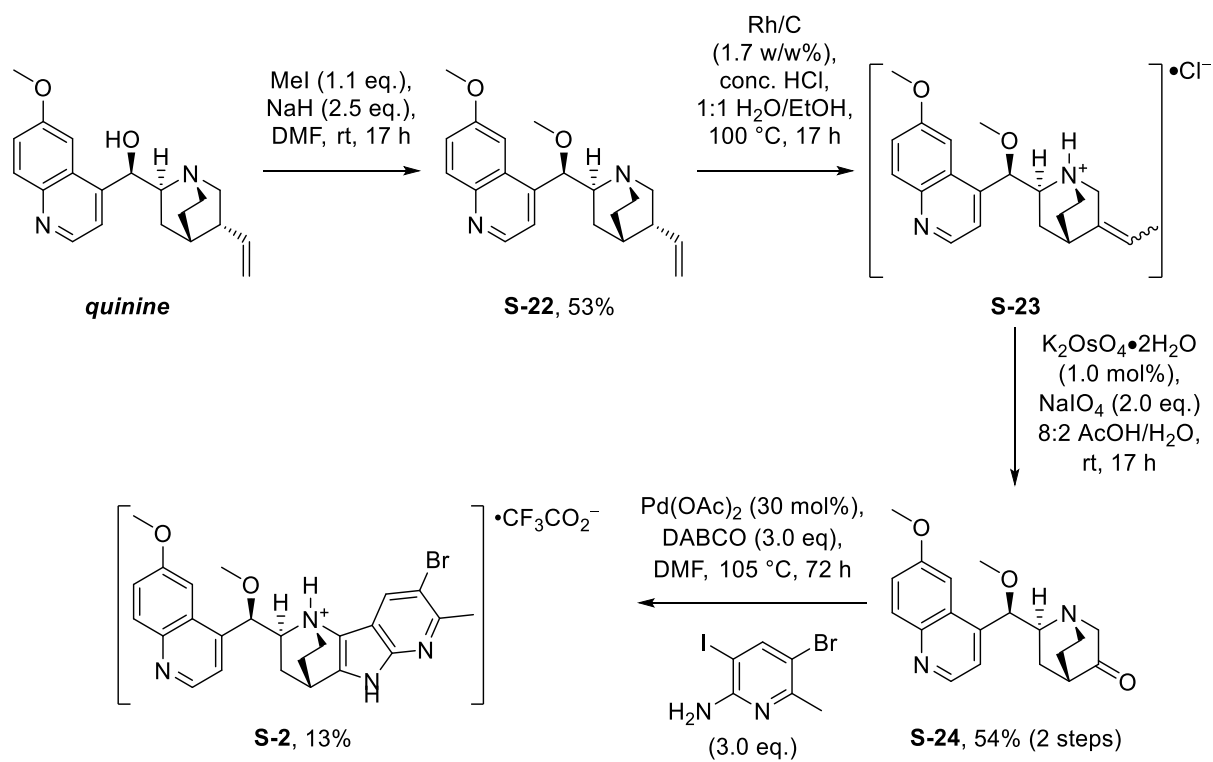

**4-[(R)-[(1S,2S,4S,5R)-5-Ethenyl-1-azabicyclo[2.2.2]octan-2-yl](methoxy)methyl]-6-methoxyquinoline S-22**

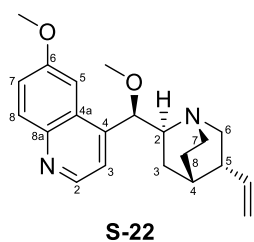

To a stirred solution of quinine (2.0 g, 6.2 mmol, 1.0 eq.) in anhydrous DMF (20 mL) was added portionwise NaH (60% dispersion in mineral oil, 618 mg, 15.5 mmol, 2.5 eq.) at rt. The reaction mixture was stirred for 1 h, then MeI (430  $\mu$ l, 6.9 mmol, 1.1 eq.) was added dropwise. The reaction mixture was stirred for 17 h, then quenched with sat. aq. brine solution (20 mL). The resulting

solution was extracted with EtOAc (3  $\times$  50 mL), then the combined organics were dried over MgSO<sub>4</sub>, filtered, and concentrated *in vacuo*. Flash column chromatography eluting with 9:1 EtOAc–MeOH gave the title product as an off-white solid (1.11 g, 3.3 mmol, 53%). **<sup>1</sup>H NMR** (500 MHz, CD<sub>3</sub>OD):  $\delta$  8.65 (1H, d, *J* 4.6, quinoline 2-H), 7.94 (1H, d, *J* 9.8, quinoline 8-H), 7.54 (1H, d, *J* 4.6, quinoline 3-H), 7.44-7.38 (2H, m, quinoline 5-H and 7-H), 5.70 (1H, ddd, *J* 17.1, 10.4, 7.5, CHCH=CH<sub>2</sub>), 5.10 (1H, d, *J* 3.0, CH(OCH<sub>3</sub>)), 4.93 (1H, dt, *J* 17.2, 1.5, CHCH=CH<sub>cis</sub>H<sub>trans</sub>), 4.88-4.83 (1H, m, CHCH=CH<sub>cis</sub>H<sub>trans</sub>), 3.95 (3H, s, OCH<sub>3</sub>), 3.52-3.45 (1H, m, 6-H<sub>A</sub>), 3.31 (OCH<sub>3</sub>), 3.13-3.04 (2H, m, 2-H and 7-H<sub>A</sub>), 2.78-2.69 (1H, m, 6-H<sub>B</sub>), 2.64 (1H, ddd, *J* 13.6, 5.0, 2.6, 7-H<sub>B</sub>), 2.36-2.29 (1H, m, 5-H), 1.87-1.74 (3H, m, 3-H<sub>A</sub>, 4-H, and 8-H<sub>A</sub>), 1.62-1.54 (1H, m, 8-H<sub>B</sub>), 1.51-1.44 (1H, m, 3-H<sub>B</sub>). **<sup>13</sup>C NMR** (125 MHz, CD<sub>3</sub>OD):  $\delta$  159.9 (quinoline 6-C), 148.2 (quinoline 2-C), 146.4 (Ar-C<sub>q</sub>), 145.1 (Ar-C<sub>q</sub>), 142.5 (CH=CH<sub>2</sub>), 131.6 (quinoline 8-C), 128.9 (Ar-C<sub>q</sub>), 123.6 (quinoline 7-C), 120.3 (quinoline 3-C), 115.1 (CH=CH<sub>2</sub>), 102.3 (quinoline 5-C), 83.2 (CH(OCH<sub>3</sub>)), 61.0 (2-C), 57.5 (7-C or OCH<sub>3</sub>), 57.4 (7-C or OCH<sub>3</sub>), 56.5 (OCH<sub>3</sub>), 44.2 (6-C), 40.8 (5-C), 29.1 (4-C), 28.1 (8-C), 22.3 (3-C). **HRMS** (ESI): C<sub>21</sub>H<sub>27</sub>O<sub>2</sub>N<sub>2</sub> [M+H]<sup>+</sup>; calculated: 339.2067, found: 339.2067.  $[\alpha]_{20}^D = -209$  (c. 0.1, MeOH).

**(1*S*,4*S*,6*S*)-6-[(*R*)-Methoxy(6-methoxyquinolin-4-yl)methyl]-1-azabicyclo[2.2.2]octan-3-one **S-24****

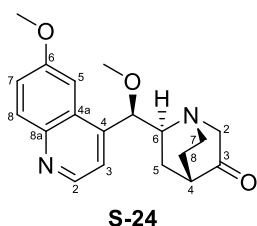

General procedure A, Part I, was followed using compound **S-22** (1.10 g, 3.25 mmol, 1.0 eq.) to give **S-23** (1.3 g<sup>\*\*\*\*\*</sup>) as a pale yellow solid which was carried forward to the next step without further purification. General Procedure A, Part II, was followed using compound **S-23** (1.3 g, assume 3.25 mmol). Flash column chromatography eluting with 5-35% {50:80:1 CH<sub>2</sub>Cl<sub>2</sub>:EtOH:NH<sub>4</sub>OH<sub>(sat. aq.)</sub>} in CH<sub>2</sub>Cl<sub>2</sub> gave the *title product* **S-24** (568 mg, 1.74 mmol, 54%) as a yellow solid. **<sup>1</sup>H NMR** (500 MHz, CD<sub>3</sub>OD, not observed): δ 8.62 (1H, d, *J* 4.6, quinoline 2-H), 7.89 (1H, d, *J* 9.2, quinoline 8-H), 7.50 (1H, d, *J* 4.6, quinoline 3-H), 7.41 (1H, d, *J* 2.7, quinoline 5-H), 7.34 (1H, dd, *J* 9.3, 2.7, quinoline 7-H), 5.14 (1H, d, *J* 4.1, CH(OCH<sub>3</sub>)), 3.92 (3H, s, OCH<sub>3</sub>), 3.61-3.53 (1H, m, 7-H<sub>A</sub>), 3.29 (3H, s, OCH<sub>3</sub>), 3.22-3.10 (2H, m, 2-H<sub>A</sub> and 6-H), 2.84-2.58 (2H, m, 2-H<sub>B</sub> and 7-H<sub>B</sub>), 2.31-2.23 (2H, m, 4-H and 5-H<sub>A</sub>), 2.12-2.02 (1H, m, 8-H<sub>A</sub>), 1.89-1.71 (1H, m, 8-H<sub>B</sub>), 1.69-1.57 (1H, m, 5-H<sub>B</sub>). **<sup>13</sup>C NMR** (125 MHz, CD<sub>3</sub>OD, 3-C not observed): δ 159.7 (quinoline 6-C), 148.2 (quinoline 2-C), 146.5 (Ar-C<sub>q</sub>), 145.0 (Ar-C<sub>q</sub>), 131.5 (quinoline 8-C), 128.9 (Ar-C<sub>q</sub>), 123.6 (quinoline 7-C), 120.2 (quinoline 3-C), 102.5 (quinoline 5-C), 82.9 (CH(OCH<sub>3</sub>)), 65.3 (2-C), 61.1 (6-C), 57.5 (OCH<sub>3</sub>), 56.4 (OCH<sub>3</sub>), 43.4 (7-C), 41.6 (4-C), 26.8 (5-C), 25.7 (8-C). **HRMS** (ESI): C<sub>19</sub>H<sub>23</sub>O<sub>3</sub>N<sub>2</sub> [M+H]<sup>+</sup>; calculated: 327.1703, found: 327.1700. [α]<sub>20</sub><sup>D</sup> = -125 (c. 0.1, MeOH).

<sup>\*\*\*\*\*</sup> Maximum theoretical yield = 1.22 g.

**(1*R*,11*S*,13*S*)-5-Bromo-13-[(*R*)-methoxy(6-methoxyquinolin-4-yl)methyl]-6-methyl-1,7,9-triazatetracyclo[9.2.2.0<sup>2,10</sup>.0<sup>3,8</sup>]pentadeca-2(10),3(8),4,6-tetraen-1-ium trifluoroacetate **S-2****

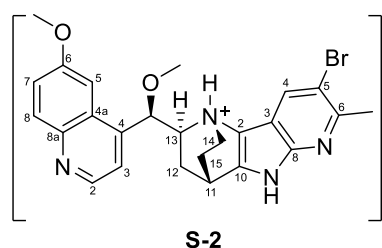

•CF<sub>3</sub>CO<sub>2</sub><sup>-</sup> Prepared according to General Procedure B using ketone **S-24** and 30 mol% Pd(OAc)<sub>2</sub> (72h). Flash column chromatography eluting with 1:19 to 1:4 ({50:80:1 CH<sub>2</sub>Cl<sub>2</sub>:EtOH:NH<sub>4</sub>OH}/CH<sub>2</sub>Cl<sub>2</sub>), followed by mass-directed preparative HPLC (MeCN in H<sub>2</sub>O + 0.1% TFA; Rt = 14 min)

gave the *title compound* **S-2** (20 mg, 40 μmol, 13%) as a yellow solid. **<sup>1</sup>H NMR** (700 MHz, CD<sub>3</sub>OD, NH and NH<sup>+</sup> not observed) δ 8.93 (1H, d, *J* 5.4, quinoline 2-H), 8.41 (1H, indole 4-H), 8.08 (1H, d, *J* 9.2, quinoline 8-H), 8.06 (1H, d, *J* 5.4, quinoline 3-H), 7.71 (1H, d, 2.3, quinoline 5-H), 7.67 (1H, dd, *J* 9.2, 2.3, quinoline 7-H), 6.30 (1H, app. s, CH(OCH<sub>3</sub>)), 4.54-4.46 (1H, m, 14-H<sub>A</sub>), 4.10 (3H, s, OCH<sub>3</sub>), 3.77 (1H, app. s, 11-H), 3.72-3.68 (1H, m, 13-H), 3.62 (3H, s, OCH<sub>3</sub>), 3.30-3.24 (1H, m, 14-H<sub>B</sub>), 2.66 (3H, s, CH<sub>3</sub>), 2.65-2.61 (1H, m, 12-H<sub>A</sub>), 2.48-2.42 (1H, m, 15-H<sub>A</sub>), 2.37-2.33 (1H, m, 15-H<sub>B</sub>), 1.98 (1H, d, *J* 11.7, 12-H<sub>B</sub>). **<sup>13</sup>C NMR** (176 MHz, CD<sub>3</sub>OD, CF<sub>3</sub>CO<sub>2</sub><sup>-</sup> not observed) δ 162.5 (q, *J*<sub>CF</sub> 35.6, CF<sub>3</sub>CO<sub>2</sub><sup>-</sup>), 161.9 (quinoline 6-C), 151.1 (Ar-C<sub>q</sub>), 145.7 (Ar-C<sub>q</sub>), 144.1 (quinoline 2-C), 141.9 (Ar-C<sub>q</sub>), 138.6 (Ar-C<sub>q</sub>), 129.6 (indole 4-C), 127.8 (quinoline 7-C), 126.7 (quinoline 8-C), 120.4 (quinoline 3-C), 116.9 (Ar-C<sub>q</sub>), 114.8 (Ar-C<sub>q</sub>), 111.7 (Ar-C<sub>q</sub>), 109.1 (Ar-C<sub>q</sub>), 102.6 (quinoline 5-C), 93.6 (Ar-C<sub>q</sub>), 78.16 (CH(OCH<sub>3</sub>)), 68.7 (13-C), 58.1 (OCH<sub>3</sub>), 57.5 (OCH<sub>3</sub>), 51.1, (14-C), 28.6 (11-C), 27.1 (15-C), 25.5 (12-C), 25.1 (CH<sub>3</sub>). **HRMS** (ESI): C<sub>25</sub>H<sub>26</sub>O<sub>2</sub>N<sub>4</sub><sup>79</sup>Br [M+H]<sup>+</sup>; calculated: 493.1234, found: 493.1229; C<sub>25</sub>H<sub>26</sub>O<sub>2</sub>N<sub>4</sub><sup>81</sup>Br [M+H]<sup>+</sup>; calculated: 495.1213, found: 495.1208. [α]<sub>D</sub><sup>20</sup> -10 (c. 0.1, MeOH).

## 6.3.2.5.3 Preparation of compounds S-3 and S-4

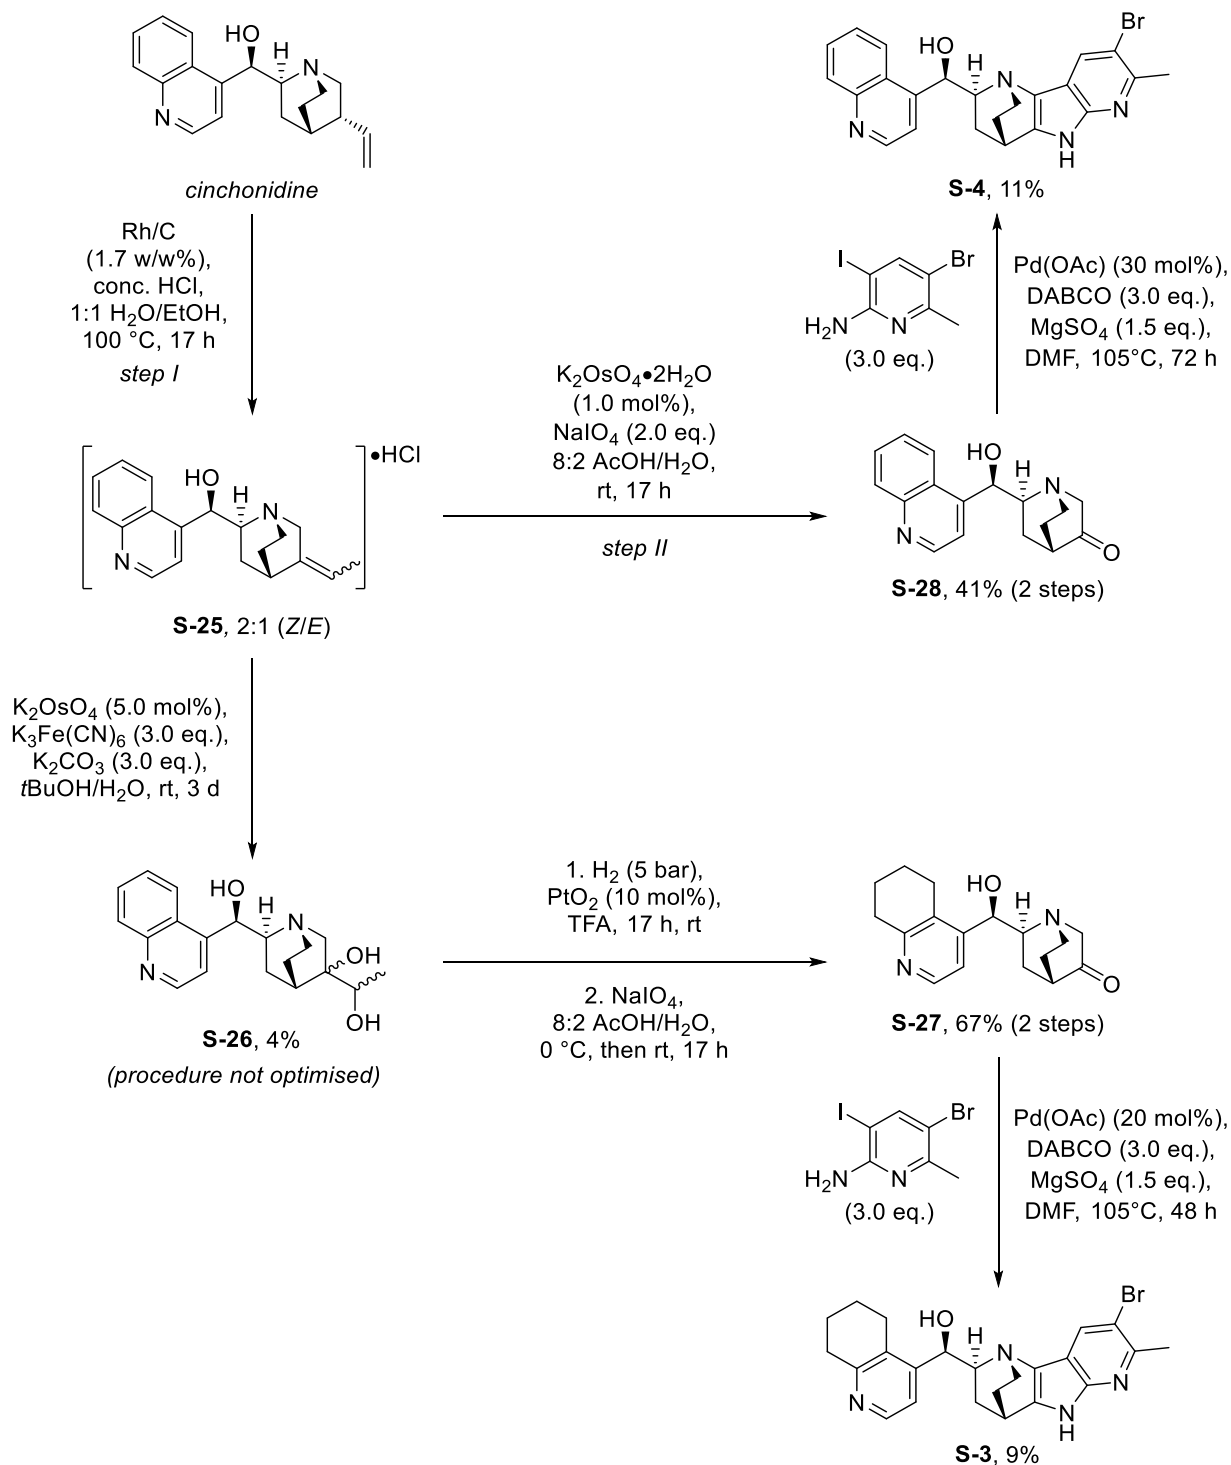

**(1*S*,2*S*,4*S*)-5-Ethylidene-2-[(*R*)-hydroxy(quinolin-4-yl)methyl]-1-azabicyclo[2.2.2]octan-1-ium chloride **S-25****

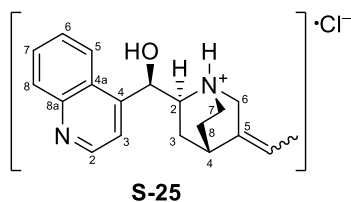

General procedure A, Part I, was followed using cinchonidine (6.0 g, 20.4 mmol) to give the title product **S-25** (8.1 g<sup>††††</sup>) as a pale yellow solid which was carried forward to the next step without further purification. <sup>1</sup>H NMR (700 MHz, CD<sub>3</sub>OD, 2:1 mixture of Z/E alkenes, NH<sup>+</sup> and OH not observed) δ 9.28 (1H, app. s, quinoline 2-H), 8.91 (0.66H, d, *J* 8.0, major quinoline 8-H), 8.88 (0.33H, d, *J* 8.0, minor quinoline 8-H), 8.42 (1H, app. s, quinoline 3-H), 8.36 (1H, d, *J* 8.0, quinoline 5-H), 8.24 (1H, app. s, quinoline 6-H), 8.13-8.06 (1H, m, quinoline 7-H), 6.62 (1H, d, *J* 5.4, CH(OH)), 5.50 (0.66H, d, *J* 5.6, major C=CHCH<sub>3</sub>), 5.44 (0.33H, d, *J* 4.9, minor C=CHCH<sub>3</sub>), 4.40 (1H, app. s, quinuclidine 7-H<sub>A</sub>), 4.28-3.99 (2H, m, quinuclidine 6-H<sub>A</sub> and quinuclidine 6-H<sub>B</sub>), 3.82 (0.66H, app. s, major quinuclidine 2-H), 3.76 (0.33H, app. s, minor quinuclidine 2-H), 3.43 (1H, d, *J* 9.3, quinuclidine 7-H<sub>B</sub>), 3.15 (0.66H, s, minor quinuclidine 4-H), 2.70 (0.33H, s, major quinuclidine 4-H), 2.45 (1H, s, quinuclidine 3-H<sub>A</sub>), 2.25 (1H, d, *J* 12.0, quinuclidine 8-H<sub>A</sub>), 1.96 (1H, d, *J* 12.0, quinuclidine 8-H<sub>B</sub>), 1.61 (2H, d, *J* 4.9, minor CH<sub>3</sub>), 1.54 (1H, d, *J* 5.6, major CH<sub>3</sub>), 1.48 (1H, app. s, quinuclidine 3-H<sub>B</sub>). <sup>13</sup>C NMR (176 MHz, CD<sub>3</sub>OD, 2:1 mixture of Z/E alkenes): δ 160.7 (Ar-C<sub>q</sub>), 160.6 (Ar-C<sub>q</sub>), 145.6 (quinoline 2-C), 138.9 (Ar-C<sub>q</sub>), 138.9 (Ar-C<sub>q</sub>), 136.3 (quinoline 6-C), 132.1 (quinoline 7-C), 131.8 (Ar-C<sub>q</sub>), 130.9 (Ar-C<sub>q</sub>), 127.2 (major quinoline 8-C), 127.2 (minor quinoline 8-C), 126.3 (Ar-C<sub>q</sub>), 126.2 (Ar-C<sub>q</sub>), 122.5 (minor quinoline 5-C), 122.5 (major quinoline 5-C), 121.3 (minor quinoline 3-C), 121.2 (major quinoline 3-C), 120.9 (C=CHCH<sub>3</sub>), 68.4 (minor CH(OH)), 68.4 (major CH(OH)), 62.4 (major quinuclidine 2-C), 62.2 (minor quinuclidine 2-C), 58.4 (minor quinuclidine 6-C), 56.7 (major quinuclidine 6-C), 46.2 (major quinuclidine 7-C), 46.1 (minor quinuclidine 7-C), 32.6 (major quinuclidine 4-C), 25.8 (minor quinuclidine 4-C), 25.5 (minor quinuclidine 8-C), 24.8 (major quinuclidine 8-C), 24.5 (minor quinuclidine 3-C), 24.1 (major quinuclidine 3-C), 13.0 (minor CH<sub>3</sub>), 12.8 (major CH<sub>3</sub>). HRMS (ESI): calc. for [M+H]<sup>+</sup> C<sub>19</sub>H<sub>23</sub>ON<sub>2</sub>: 295.1849 found 295.18039.

<sup>††††</sup> Maximum theoretical yield = 6.8 g.

**(1*S*,4*S*,6*S*)-6-[(*R*)-Hydroxy(quinolin-4-yl)methyl]-3-(1-hydroxyethyl)-1-azabicyclo[2.2.2]octan-3-ol S-26**

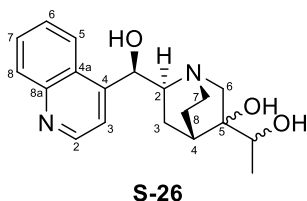

To a stirred solution of compound **S-25** (free base form,<sup>####</sup> 2.0 g, 6.8 mmol) in *t*BuOH/H<sub>2</sub>O (36 mL, 0.2 M) was added was K<sub>2</sub>CO<sub>3</sub> (2.9 g, 20.4 mmol, 3.0 eq.) and K<sub>3</sub>Fe(CN)<sub>6</sub> (6.7 g, 20.4 mmol, 3.0 eq.) The mixture was stirred for 45 min, then OsO<sub>4</sub> (4.0% in H<sub>2</sub>O, 432 μL, 68 μmol, 1.0 mol%) was added. The reaction mixture was stirred for 6 h. Due to the poor conversion observed,<sup>§§§§§</sup> K<sub>2</sub>OsO<sub>4</sub> (75 mg, 0.20 mmol, 4.0 mol%) was added. The reaction mixture was stirred for an additional 3 days. The reaction mixture was quenched by the addition of Na<sub>2</sub>S<sub>2</sub>O<sub>5</sub> (1.0 g). Sat. aq. NaHCO<sub>3</sub> solution (100 mL) was added and the reaction mixture was extracted with 9:1 CHCl<sub>3</sub>/MeOH (4 × 100 mL). The combined organics were dried, filtered, and concentrated *in vacuo*. Flash column chromatography eluting with 50-100% {50:8:1 CH<sub>2</sub>Cl<sub>2</sub>:EtOH:NH<sub>4</sub>OH} in CH<sub>2</sub>Cl<sub>2</sub> gave the *title compound S-26* (97 mg, 0.30 mmol, 4%, mixture of 4 diastereomers) as a pale brown oil. **<sup>1</sup>H NMR** (700 MHz, CD<sub>3</sub>OD, **characteristic peaks given**, see Section 7.0 for the processed NMR): δ 8.78-8.73 (1H, m, Ar-H), 8.17 (1H, d, *J* 8.4, Ar-H), 7.99 (1H, d, *J* 8.4, Ar-H), 7.73-7.65 (2H, m, Ar-H), 7.61-7.54 (1H, m, Ar-H), 5.67-5.60 (1H, m, ArCH(OH)), 1.05 (0.33H, d, *J* 6.4, diastereomer-1, CH<sub>3</sub>), 1.01 (0.33H, d, *J* 6.3, diastereomer-2, CH<sub>3</sub>), 1.00 (0.17H, d, *J* 6.3, diastereomer-3, CH<sub>3</sub>), 0.99 (0.17H, d, *J* 6.4, diastereomer-4, CH<sub>3</sub>). **<sup>13</sup>C NMR** (175 MHz, CD<sub>3</sub>OD): δ 152.4 (2 peaks), 152.3 (2 peaks), 150.90 (2 peaks), 150.8 (2 peaks), 148.8, 148.7 (2 peaks), 130.6 (3 peaks), 130.0 (2 peaks), 129.9 (2 peaks), 128.1 (2 peaks), 128.0, 127.1 (3 peaks), 124.6 (2 peaks), 124.5, 119.9 (2 peaks), 119.8 (2 peaks), 74.4, 74.2, 74.1, 73.9, 72.7, 72.6, 72.1, 72.3, 72.1, 72.0, 71.5, 71.3, 70.9, 69.8, 65.9, 65.1, 63.5, 63.1, 61.4, 61.1, 60.5, 60.4, 43.8, 43.7 (2 peaks), 43.5, 31.7, 31.3, 30.5, 30.1, 23.7, 23.6, 23.5, 23.4, 22.8, 22.6, 22.2 (2 peaks), 17.6, 17.5, 16.2, 16.0. **HRMS** (ESI): C<sub>19</sub>H<sub>25</sub>O<sub>3</sub>N<sub>2</sub> [M+H]<sup>+</sup>; calculated: 329.1860, found: 329.1860.

#### Prepared by passing a sample of compound **S-25** through a SiO<sub>2</sub> plug eluting with 1:1 (50:8:1 CH<sub>2</sub>Cl<sub>2</sub>:EtOH:NH<sub>4</sub>OH):CH<sub>2</sub>Cl<sub>2</sub>.

§§§§§ As judged by analysis of the crude reaction mixture using LCMS.

**(1*S*,4*S*,6*S*)-6-[(*R*)-Hydroxy(5,6,7,8-tetrahydroquinolin-4-yl)methyl]-1-azabicyclo[2.2.2]octan-3-one **S-27****

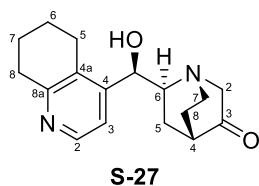

Compound **S-26** (70 mg, 0.21 mmol) was dissolved in TFA (2.0 mL) and PtO<sub>2</sub> (5 mg, 21 μmol, 10 mol%) was added. The reaction mixture was stirred under an atmosphere of H<sub>2</sub> (5 bar) for 17 h. The reaction mixture was filtered through celite, flushing through with CH<sub>2</sub>Cl<sub>2</sub>, and concentrated *in vacuo*. The crude reaction product was diluted in 8:2 AcOH/H<sub>2</sub>O (1.0 mL). NaIO<sub>4</sub> (90 mg, 0.42 mmol, 2.0 eq.) was added at 0 °C. The reaction mixture was warmed to rt, then stirred overnight. The reaction mixture was cooled to 0 °C, then quenched with 10 M solution NaOH (~1.5 mL) until it was basic. The reaction mixture was transferred to a separating funnel and extracted with 9:1 CHCl<sub>3</sub>/MeOH (5 x 10 mL). The combined organics were dried over Na<sub>2</sub>SO<sub>4</sub>, filtered, and concentrated *in vacuo*. Flash column chromatography eluting with 40% {50:8:1 CH<sub>2</sub>Cl<sub>2</sub>:EtOH:NH<sub>4</sub>OH} in CH<sub>2</sub>Cl<sub>2</sub> gave the *title product S-27* (40 mg, 0.14 mmol, 67% over 2 steps) as a colourless amorphous solid. **<sup>1</sup>H NMR** (500 MHz, CD<sub>3</sub>OD, OH not observed, spectrum complicated by deuterium exchange: only 1 of 2 protons at 2-C observed): δ 8.25 (1H, d, *J* 5.2, pyridine 2-H), 7.39 (1H, d, *J* 5.2, pyridine 3-H), 5.14 (1H, d, *J* 4.9, CH(OH)), 3.67-3.60 (1H, m, quinuclidine 7-H<sub>A</sub>), 3.30-3.25 (1H, m, 2-H), 3.11-3.04 (1H, m, quinuclidine 6-H), 2.96-2.88 (3H, m, CH<sub>A</sub>H<sub>B</sub> and CH<sub>2</sub>), 2.84-2.73 (2H, m, CH<sub>A</sub>H<sub>B</sub> and quinuclidine 7-H<sub>B</sub>), 2.46-2.42 (1H, m, quinuclidine 4-H), 2.37 (1H, ddd, *J* 13.4, 8.0, 2.2, quinuclidine 5-H<sub>A</sub>), 2.19-2.12 (1H, m, quinuclidine 8-H<sub>A</sub>), 1.97-1.80 (6H, m, includes 5-H<sub>B</sub>, 8-H<sub>B</sub> and 2 x CH<sub>2</sub>). **<sup>13</sup>C NMR** (125 MHz, CD<sub>3</sub>OD): complicated by deuterium exchange at 2-C, see Section 7.0 for the processed NMR. **HRMS** (ESI): C<sub>17</sub>H<sub>23</sub>O<sub>2</sub>N<sub>2</sub> [M+H]<sup>+</sup>; calculated: 287.1754, found: 287.1751. [α]<sub>20</sub><sup>D</sup> = -79 (c. 0.1, MeOH).



**(1*R*,11*S*,13*S*)-5-Bromo-13-[(*R*)-hydroxy(5,6,7,8-tetrahydroquinolin-4-yl)methyl]-6-methyl-1,7,9-triazatetracyclo[9.2.2.0<sup>2,10</sup>.0<sup>3,8</sup>]pentadeca-2(10),3(8),4,6-tetraen-1-ium trifluoroacetate **S-3****

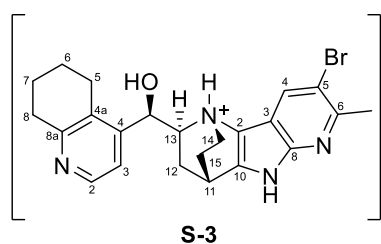

Prepared according to General Procedure B using ketone **S-27** (39 mg, 0.14 mmol), MgSO<sub>4</sub> (1.5 eq.) and 30 mol% Pd(OAc)<sub>2</sub> (72 h). Flash column chromatography eluting with 5-20% {50:80:1 CH<sub>2</sub>Cl<sub>2</sub>:EtOH:NH<sub>4</sub>OH} in CH<sub>2</sub>Cl<sub>2</sub> gave the *title compound S-3* (7 mg, 12 μmol, 9%) as a brown oil.

**<sup>1</sup>H NMR** (500 MHz, CD<sub>3</sub>OD, OH not observed): δ 8.52 (1H, d, *J* 6.2, Py 2-H), 8.34 (1H, s, indole 4-H), 8.08 (1H, d, *J* 6.2, Py 3-H), 5.96 (1H, app. s, CH(OH)), 4.65 (1H, ddd, *J* 11.7, 9.2, 4.1, 14-H<sub>A</sub>), 3.80-3.76 (1H, m, 11-H), 3.59 (1H, dd, *J* 10.3, 6.6, 13-H), 3.21-3.14 (1H, m, 14-H<sub>B</sub>), 3.12-2.96 (3H, m, CH<sub>A</sub>H<sub>B</sub> and CH<sub>2</sub>), 2.81-2.73 (1H, m, CH<sub>A</sub>H<sub>B</sub>), 2.68-2.62 (4H, m, includes 12-H<sub>A</sub>, and at δ 2.65: 3H, s, CH<sub>3</sub>), 2.47-2.39 (1H, m, 15-H<sub>A</sub>), 1.99-1.80 (5H, m, 15-H<sub>B</sub> and 2 × CH<sub>2</sub>), 1.58-1.50 (1H, m, 12-H<sub>B</sub>). **<sup>13</sup>C NMR** (125 MHz, CD<sub>3</sub>OD): δ 160.7 (Ar-C<sub>q</sub>), 154.1 (Ar-C<sub>q</sub>), 151.2 (Ar-C<sub>q</sub>), 145.5 (Ar-C<sub>q</sub>), 141.8 (Ar-C<sub>q</sub>), 139.7 (Py 2-C), 136.1 (Ar-C<sub>q</sub>), 129.8 (indole 4-C), 123.2 (Py 3-C), 115.4 (Ar-C<sub>q</sub>), 114.9 (Ar-C<sub>q</sub>), 111.6 (Ar-C<sub>q</sub>), 67.8 (13-C), 67.5 (CH(OH)), 51.7 (14-C), 29.0 (CH<sub>2</sub>), 28.5 (11-C), 26.8 (15-C), 25.7 (CH<sub>2</sub>), 25.1 (CH<sub>3</sub>), 24.7 (12-C), 22.1 (CH<sub>2</sub>), 21.3 (CH<sub>2</sub>). **HRMS** (ESI): C<sub>2</sub>H<sub>26</sub>ON<sub>4</sub><sup>79</sup>Br [M+H]<sup>+</sup>; calculated: 453.1285, found: 453.1282; C<sub>2</sub>H<sub>26</sub>ON<sub>4</sub><sup>81</sup>Br [M+H]<sup>+</sup>; calculated: 455.1264, found: 455.1262.

**(1S,4S,6S)-6-[(1R)-1-(Quinolin-4-yl)ethyl]-1-azabicyclo[2.2.2]octan-3-one S-28**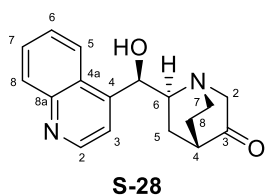

General Procedure A, Part II, was followed using compound **S-25** (2.0 g, 6.1 mmol). Flash column chromatography eluting with 5-20% {50:80:1 CH<sub>2</sub>Cl<sub>2</sub>:EtOH:NH<sub>4</sub>OH(sat. aq.)} in CH<sub>2</sub>Cl<sub>2</sub> gave the *title product* **S-28** (791 mg, 2.80 mmol, 41%) as a yellow solid. **<sup>1</sup>H NMR** (600 MHz, CD<sub>3</sub>OD, OH not observed): δ 8.83 (1H, d, *J* 4.6, quinoline 2-H), 8.27 (1H, d, *J* 8.4 quinoline 8-H), 8.06 (1H, d, *J* 8.7, quinoline 5-H), 7.80-7.76 (1H, m, quinoline 6-H), 7.75 (1H, d, *J* 4.6, quinoline 3-H), 7.68-7.65 (1H, m, quinoline 7-H), 5.74 (1H, d, *J* 4.3, CH(OH)), 3.82-3.76 (1H, m, quinuclidine 7-H<sub>A</sub>), 3.29-3.21 (3H, m, quinuclidine 6-H, quinuclidine 2-H<sub>A</sub> and quinuclidine 2-H<sub>B</sub>), 2.84-2.78 (1H, m, quinuclidine 7-H<sub>B</sub>), 2.46-2.41 (2H, m, quinuclidine 4-H and quinuclidine 5-H<sub>A</sub>), 2.25-2.18 (1H, m, quinuclidine 8-H<sub>A</sub>), 1.95-1.88 (1H, m, quinuclidine 8-H<sub>B</sub>), 1.80-1.74 (1H, m, quinoline 5-H<sub>B</sub>). **<sup>13</sup>C NMR** (151 MHz, CD<sub>3</sub>OD): δ 220.3 (quinuclidine 3-C), 152.1 (Ar-C<sub>q</sub>), 151.0 (quinoline 2-C), 148.8 (Ar-C<sub>q</sub>), 130.7 (quinoline 6-C), 130.0 (quinoline 5-C), 128.2 (quinoline 7-C), 127.2 (Ar-C<sub>q</sub>), 124.6 (quinolone 8-C), 119.9 (quinoline 3-C), 71.9 (CH(OH)), 65.5 (quinuclidine 2-C), 61.9 (quinuclidine 6-C), 43.4 (quinuclidine 7-C), 41.8 (quinuclidine 4-C), 26.6 (quinuclidine 5-C), 25.8 (quinuclidine 8-C). **HRMS** (ESI): calc. for [M+H]<sup>+</sup> C<sub>17</sub>H<sub>19</sub>O<sub>2</sub>N<sub>2</sub>: 283.1441, found: 283.1440. [α]<sub>D</sub><sup>20</sup> = -128 (MeOH).

**(1*R*,11*S*,13*S*)-5-Bromo-13-[(*R*)-hydroxy(quinolin-4-yl)methyl]-6-methyl-1,7,9-triazatetracyclo[9.2.2.0<sub>2,10</sub>.0<sub>3,8</sub>]pentadeca-2(10),3,5,7-tetraen-1-ium trifluoroacetate **S-4****

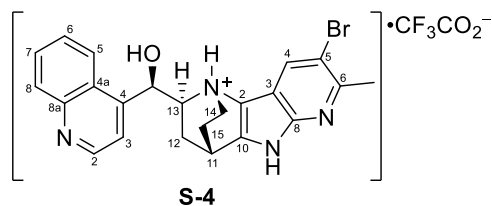

Prepared according to General Procedure B using ketone **S-28** (100 mg, 0.35 mmol, 1.0 eq.) and 20 mol% Pd(OAc)<sub>2</sub> (24 h). Flash column chromatography eluting with 5-20% {50:80:1 CH<sub>2</sub>Cl<sub>2</sub>:EtOH:NH<sub>4</sub>OH} in CH<sub>2</sub>Cl<sub>2</sub> followed by mass-directed

preparative HPLC (MeCN in H<sub>2</sub>O + 0.1% TFA; Rt = 11.4 min) gave the *title compound* **S-4** (18.3 mg, 40.7 μmol, 11%) as a yellow solid. **<sup>1</sup>H NMR** (700 MHz, CD<sub>3</sub>OD, NH<sup>+</sup>, NH, and OH not observed): δ 9.04 (1H, d, *J* 5.2, quinoline 2-H), 8.49 (1H, d, app. *J* 8.5, quinoline 8-H), 8.34 (1H, s, indole 4-H), 8.16-8.13 (2H, m, quinoline 3-H and quinoline 5-H), 7.96 (1H, app. t, *J* 7.7, quinoline 6-H), 7.86 (1H, app. t, *J* 7.7, quinoline 7-H), 6.52 (1H, app. s, CH(OH)), 4.84-4.81 (1H, m, 14-H<sub>A</sub>) 3.81-3.75 (2H, m, 11-H and 13-H), 3.25 (1H, td, *J* 11.3, 5.0, 14-H<sub>B</sub>), 2.69 (1H, ddd, *J* 12.3, 6.4, 2.0, 12-H<sub>A</sub>), 2.54-2.48 (1H, m, 15-H<sub>A</sub>), 2.67 (3H, s, CH<sub>3</sub>), 1.97-1.91 (1H, m, 15-H<sub>B</sub>), 1.56-1.50 (1H, m, 12-H<sub>B</sub>). **<sup>13</sup>C NMR** (176 MHz, CD<sub>3</sub>OD, CF<sub>3</sub>CO<sub>2</sub><sup>-</sup> not observed): δ 162.5 (q, *J*<sub>CF</sub> 35.6, CF<sub>3</sub>CO<sub>2</sub><sup>-</sup>), 154.2 (Ar-C<sub>q</sub>), 151.1 (Ar-C<sub>q</sub>), 148.7 (quinoline 2-C), 145.5 (Ar-C<sub>q</sub>), 144.5 (Ar-C<sub>q</sub>), 141.9 (Ar-C<sub>q</sub>), 133.4 (quinolone 6-C), 130.3 (quinoline 7-C), 129.6 (indole 4-C), 126.9 (quinoline 3-C), 126.7 (Ar-C<sub>q</sub>), 124.5 (quinoline 8-C), 120.4 (quinoline 5-C), 115.6 (Ar-C<sub>q</sub>), 114.8 (Ar-C<sub>q</sub>), 111.5 (Ar-C<sub>q</sub>), 69.7 (13-C), 68.0 (CH(OH)), 52.1 (14-C), 28.6 (11-C), 26.9 (15-C), 25.2 (12-C), 25.1 (CH<sub>3</sub>). **HRMS** (ESI): C<sub>23</sub>H<sub>22</sub>ON<sub>4</sub><sup>79</sup>Br [M+H]<sup>+</sup>; calculated: 449.0972, found 449.09675; C<sub>23</sub>H<sub>22</sub>ON<sub>4</sub><sup>81</sup>Br [M+H]<sup>+</sup>; calculated: 451.0951, found 451.0943. [α]<sub>D</sub><sup>20</sup> = +123 (c. 0.1, MeOH).

## 6.3.2.5.4 Preparation of compound S-5

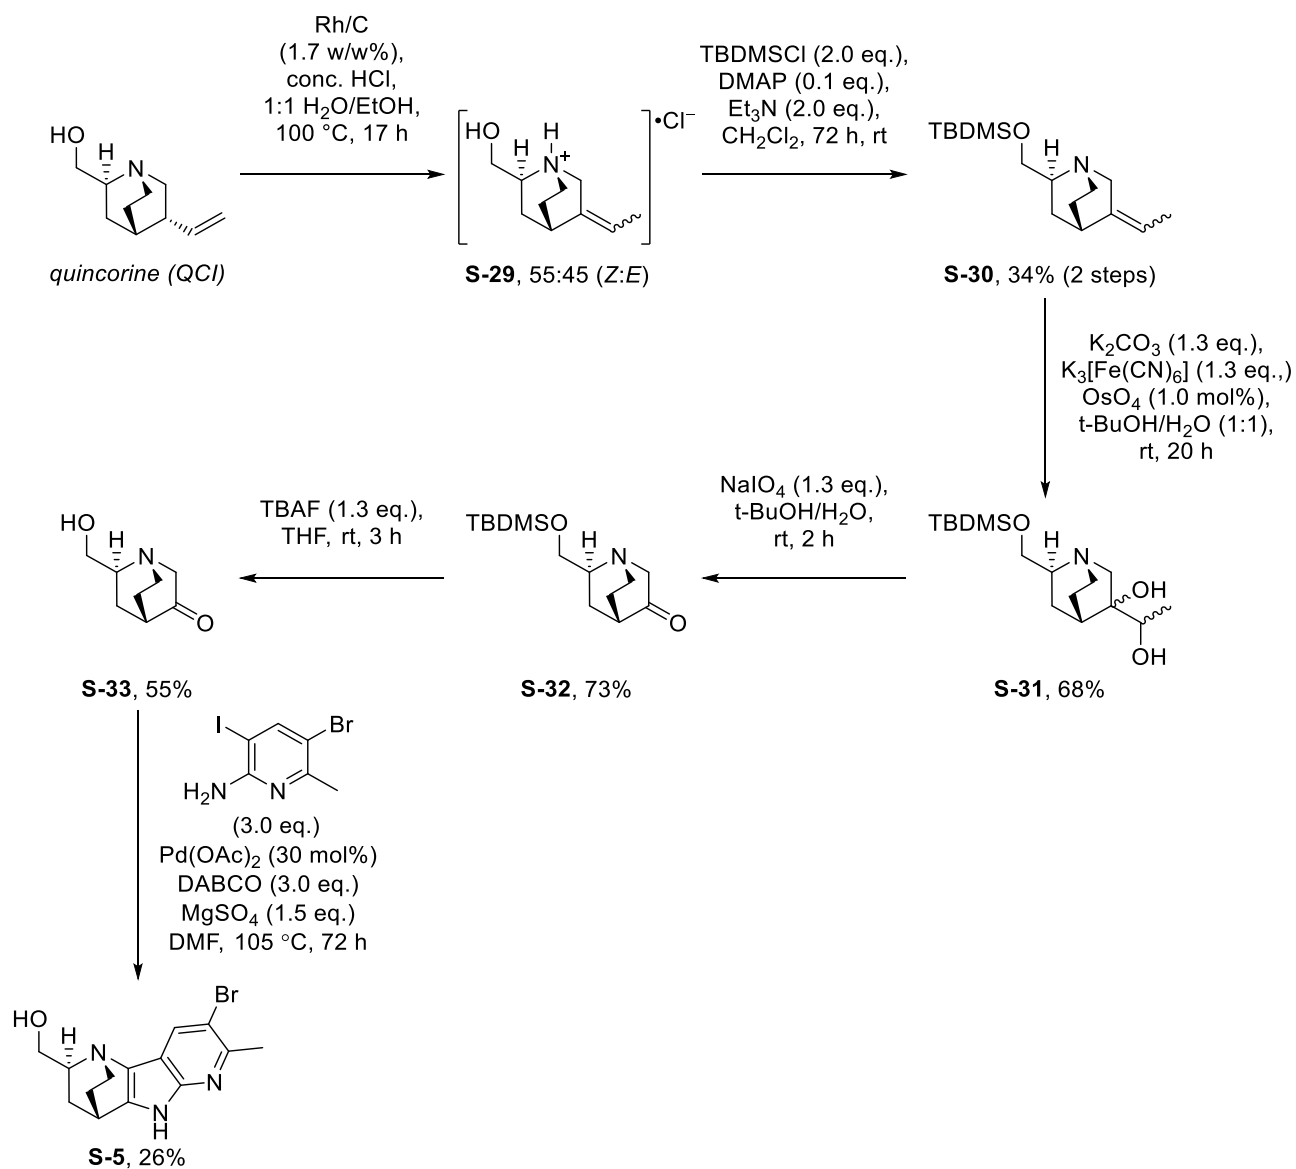

**(1*S*,2*S*,4*S*)-5-Ethylidene-2-(hydroxymethyl)-1-azabicyclo[2.2.2]octan-1-ium chloride **S-29****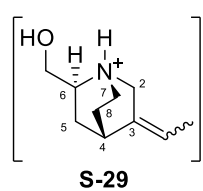

General procedure A, Part I, was followed using quincorine (1.52 g, 9.1 mmol). Flash column chromatography eluting with 1:4 ({50:80:1 DCM:EtOH:NH<sub>4</sub>OH}/DCM) gave the *title compound* **S-29** (2.1 g<sup>\*\*\*\*\*</sup>) as yellow oil. <sup>1</sup>H NMR (500 MHz, CD<sub>3</sub>OD, 55:45 mixture of Z/E alkenes, NH<sup>+</sup> and OH not observed): δ 5.48 (0.55H, d, *J* 6.8, major C=CHCH<sub>3</sub>), 5.42 (0.45H, d, *J* 6.8, minor C=CHCH<sub>3</sub>), 4.09-3.91 (2H, m, 2-H<sub>A</sub> and 2-H<sub>B</sub>), 3.84-3.78 (1H, m CH<sub>A</sub>H<sub>B</sub>OH), 3.77-3.69 (1H, m CH<sub>A</sub>H<sub>B</sub>OH), 3.67-3.56 (2H, 6-H, 7-H<sub>A</sub>), 3.29-3.21 (1H, m, 7-H<sub>B</sub>), 3.09 (0.45H, s, minor 4-H), 2.63 (0.55H, s, major 4-H), 2.07-1.95 (2H, m, 5-H<sub>A</sub> and 8-H<sub>A</sub>), 1.95-1.86 (1H, m, 5-H<sub>B</sub>), 1.71 (1.35H, d, *J* 6.8, minor CH<sub>3</sub>), 1.61 (1.65H, d, *J* 6.8, major CH<sub>3</sub>), 1.58-1.51 (1H, m, 8-H<sub>B</sub>). <sup>13</sup>C NMR (126 MHz, CD<sub>3</sub>OD): δ 132.2 (minor 3-C), 131.4 (major 3-C), 120.8 (minor C=CHCH<sub>3</sub>), 120.6 (major C=CHCH<sub>3</sub>), 61.6 (minor 6-C), 61.4 (major 6-C), 61.6 (minor CH<sub>2</sub>OH), 61.2 (major CH<sub>2</sub>OH), 56.9 (minor 2-C), 55.1 (major 2-C), 42.8 (minor 7-C), 42.6 (major 7-C), 31.9 (minor 4-C), 28.4 (minor 8-C), 27.5 (major 8-C), 25.4 (minor 5-C), 25.1 (major 4-C), 24.5 (major 5-C), 12.9 (minor CH<sub>3</sub>), 12.8 (major CH<sub>3</sub>). HRMS (ESI): C<sub>10</sub>H<sub>18</sub>ON [M+H]<sup>+</sup>; calculated: 168.1383, found 168.1379.

<sup>\*\*\*\*\*</sup> Maximum theoretical yield = 1.2 g.

**(1*S*,2*S*,4*S*)-2-[[(*tert*-Butyldimethylsilyl)oxy]methyl]-5-ethylidene-1-azabicyclo[2.2.2]octane **S-30****

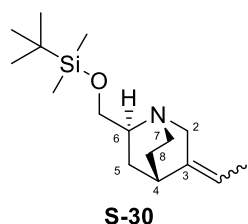

To a stirred solution of compound **S-29** (1.52 g, 9.1 mmol) in CH<sub>2</sub>Cl<sub>2</sub> (30 mL, 0.3 M) was added Et<sub>3</sub>N (3.8 mL, 27.2 mmol, 3.0 eq.). After the solution was stirred under Ar for 15 min, DMAP (111 mg, 0.9 mmol, 0.1 eq.) and TBDMSCl (4.11 g, 27.2 mmol, 3.0 eq.) were added at 0 °C. The reaction mixture was stirred for 48 h at rt until the reaction showed complete consumption of the starting

material (monitored by LCMS). The reaction mixture was washed with saturated aqueous NaHCO<sub>3</sub> (50 mL) and the resulting solution was extracted with CH<sub>2</sub>Cl<sub>2</sub> (4 x 50 mL). The combined organic layers were dried over MgSO<sub>4</sub>, filtered and concentrated *in vacuo*. The crude product was purified by flash column chromatography eluting with 1:9 ({50:80:1 CH<sub>2</sub>Cl<sub>2</sub>:EtOH:NH<sub>4</sub>OH}/ CH<sub>2</sub>Cl<sub>2</sub>) followed by removal of solvents under reduced pressure to give the *title compound* **S-30** (860 mg, 3.06 mmol, 34%) as yellow oil. **<sup>1</sup>H NMR** (700 MHz, CD<sub>3</sub>OD, 1:1 mixture of *Z/E* alkenes): δ 5.31-5.19 (1H, m, C=CHCH<sub>3</sub>), 3.76-3.68 (2H, m, CH<sub>2</sub>OTBDMS), 3.51-3.36 (2H, m, 2-H<sub>A</sub> and 2-H<sub>B</sub>), 3.22-3.14 (1H, m, 7-H<sub>A</sub>), 2.88-2.82 (1H, m, 6-H), 2.81 (0.5H, s, 4-H<sup>a</sup>), 2.72-2.63 (1H, m, 7-H<sub>B</sub>), 2.32 (0.5H, s, 4-H<sup>b</sup>), 1.78-1.66 (2H, m, 5-H<sub>A</sub> and 8-H<sub>A</sub>), 1.64-1.52 (5H, m, 5-H<sub>B</sub>, 8-H<sub>B</sub> and C=CHCH<sub>3</sub>), 0.92 (9H, s, Si(CH<sub>3</sub>)<sub>2</sub>C(CH<sub>3</sub>)<sub>3</sub>), 0.10 (3H, app. d, *J* 1.3, Si(CH<sup>a</sup>H<sub>3</sub>)<sub>2</sub>C(CH<sub>3</sub>)<sub>3</sub>), 0.08 (3H, app. d, *J* 1.3, Si(CH<sup>b</sup>H<sub>3</sub>)<sub>2</sub>C(CH<sub>3</sub>)<sub>3</sub>). **<sup>13</sup>C NMR** (176 MHz, CD<sub>3</sub>OD): δ 141.6 (3-C<sup>a</sup>), 140.5 (3-C<sup>b</sup>), 115.7 (C<sup>a</sup>HCH<sub>3</sub>), 115.4 (C<sup>b</sup>HCH<sub>3</sub>), 66.5 (C<sup>a</sup>H<sub>2</sub>OTBDMS), 66.4 (C<sup>b</sup>H<sub>2</sub>OTBDMS), 59.5 (6-C<sup>a</sup>), 59.2 (6-C<sup>b</sup>), 58.9 (2-C<sup>a</sup>), 56.6 (2-C<sup>b</sup>), 43.7 (7-C<sup>a</sup>), 43.6 (7-C<sup>b</sup>), 34.4 (4-C<sup>a</sup>), 32.0 (8-C<sup>a</sup>), 31.1 (8-C<sup>b</sup>), 28.7 (5-C<sup>a</sup>), 27.5 (5-C<sup>b</sup>), 26.8 (4-C<sup>b</sup>), 26.4 (Si(CH<sub>3</sub>)<sub>2</sub>C(C<sup>a</sup>H<sub>3</sub>)<sub>3</sub>), 26.4 (Si(CH<sub>3</sub>)<sub>2</sub>C(C<sup>b</sup>H<sub>3</sub>)<sub>3</sub>), 19.2 (Si(CH<sub>3</sub>)<sub>2</sub>C<sup>a</sup>(CH<sub>3</sub>)<sub>3</sub>), 19.2 (Si(CH<sub>3</sub>)<sub>2</sub>C<sup>b</sup>(CH<sub>3</sub>)<sub>3</sub>), 12.8 (C=CHC<sup>a</sup>H<sub>3</sub>), 12.4 (C=CHC<sup>b</sup>H<sub>3</sub>), -5.3 (Si(CH<sub>3</sub>)<sub>2</sub>C(CH<sub>3</sub>)<sub>3</sub>). **HRMS** (ESI): C<sub>16</sub>H<sub>32</sub>ONSi [M+H]<sup>+</sup>; calculated: 282.2248 found 282.2247.

**(1S,4S,6S)-6-[[(*tert*-Butyldimethylsilyl)oxy]methyl]-3-(1-hydroxyethyl)-1-azabicyclo[2.2.2]octan-3-ol **S-31****

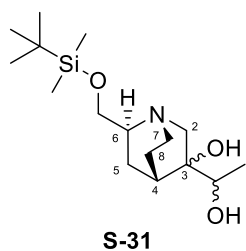

Compound **S-30** (860 mg, 3.05 mmol) was added to a two phase system of  $\text{K}_2\text{CO}_3$  (1.28 g, 9.15 mmol, 3.0 eq.) and  $\text{K}_3\text{Fe}(\text{CN})_6$  (3.01 g, 9.15 mmol, 3.0 eq.) in 1:1 *t*BuOH/ $\text{H}_2\text{O}$  (0.3 M, 10.2 mL). The reaction mixture was stirred for 45 min, then 4%  $\text{OsO}_4$  in  $\text{H}_2\text{O}$  (194  $\mu\text{L}$ , 30.6  $\mu\text{mol}$ , 1.0 mol%) was added at rt. After 20 h the reaction mixture was quenched with a saturated aqueous solution  $\text{Na}_2\text{S}_2\text{O}_3$  (2 mL) and washed with saturated aqueous  $\text{NaHCO}_3$  (50 mL) and the resulting solution was extracted with  $\text{CH}_2\text{Cl}_2$  (4 x 50 mL). The combined organic layers were dried over  $\text{MgSO}_4$ , filtered and concentrated *in vacuo*. The obtained crude was purified by flash column chromatography eluting with 1:9 ({50:80:1  $\text{CH}_2\text{Cl}_2$ :EtOH: $\text{NH}_4\text{OH}$ }/ $\text{CH}_2\text{Cl}_2$ ) followed by removal of solvents under reduced pressure gave the *title compound* **S-31** (655 mg, 2.08 mmol, 68 %) as white solid.  $^1\text{H NMR}$  (700 MHz,  $\text{CD}_3\text{OD}$ , **characteristic peaks given**, see Section 7.0 for the processed NMR):  $\delta$  3.92-3.78 (1H, m,  $\text{CH}(\text{OH})\text{CH}_3$ ), 3.75-3.67 (2H, m), 3.19-2.98 (2H, m), 2.81-2.42 (3H, m), 2.23-1.98 (1H, m), 1.88-1.47 (2H, m), 1.41-1.18 (2H, m), 1.17-1.10 (3H, m,  $\text{CH}(\text{OH})\text{CH}_3$ ), 0.93 (9H, s,  $\text{Si}(\text{CH}_3)_2\text{C}(\text{CH}_3)_3$ ), 0.12-0.04 (6H, m,  $\text{Si}(\text{CH}_3)_2\text{C}(\text{CH}_3)_3$ ).  $^{13}\text{C NMR}$  (176 MHz,  $\text{CD}_3\text{OD}$ ):  $\delta$  74.5, 74.4, 74.1, 74.0, 73.8, 72.9, 72.6, 70.8, 70.0, 66.6, 66.5, 66.4, 65.1, 64.5, 62.7, 62.4, 58.3, 58.0, 57.8, 57.7, 42.7, 42.7, 42.6, 42.4, 31.3, 31.0, 30.1, 29.8, 27.0, 26.9, 26.4, 26.4, 26.3, 26.2, 23.6, 23.5, 22.5, 22.4, 19.2, 17.6, 16.2, 16.0, -5.3. **HRMS** (ESI):  $\text{C}_{16}\text{H}_{34}\text{O}_3\text{NSi}$  [ $\text{M}+\text{H}$ ] $^+$ ; calculated: 316.2302, found: 316.2301.

**(1S,4S,6S)-6-[[*tert*-Butyldimethylsilyl]oxy]methyl]-1-azabicyclo[2.2.2]octan-3-one **S-32****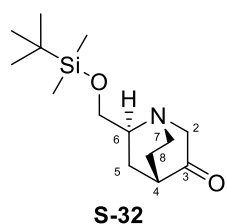

Compound **S-31** (655 mg, 2.08 mmol) was dissolved in *t*BuOH (7 mL, 0.3 M). A saturated solution of NaIO<sub>4</sub> (578 mg, 2.70 mmol, 1.3 eq.) in H<sub>2</sub>O (6.35 mL) was added. The reaction mixture was stirred at rt for 2 h, treated with aqueous NaHCO<sub>3</sub> (50 mL) and extracted with CH<sub>2</sub>Cl<sub>2</sub> (4 x 50 mL). The combined organic layers were dried over MgSO<sub>4</sub>, filtered and concentrated *in vacuo*. Flash column chromatography eluting with 1:9 ({50:80:1 CH<sub>2</sub>Cl<sub>2</sub>:EtOH:NH<sub>4</sub>OH}/CH<sub>2</sub>Cl<sub>2</sub>) gave the *title product* **S-32** (412 mg, 1.53 mmol, 73%) as white solid. <sup>1</sup>H NMR (600 MHz, CD<sub>3</sub>OD): δ 3.82 (1H, s, CH<sub>A</sub>H<sub>B</sub>OTBDMS), 3.81 (1H, s, CH<sub>A</sub>H<sub>B</sub>OTBDMS), 3.38-3.32 (1H, m, 7-H<sub>A</sub>), 3.08-2.95 (1H, m, 6-H), 2.84-2.73 (1H, m, 7-H<sub>B</sub>), 2.44-2.36 (1H, m, 4-H), 2.11-1.96 (2H, m, 5-H<sub>A</sub> and 8-H<sub>A</sub>), 1.95-1.80 (2H, m, 5-H<sub>B</sub> and 8-H<sub>B</sub>), 0.94 (9H, s, Si(CH<sub>3</sub>)<sub>2</sub>C(CH<sub>3</sub>)<sub>3</sub>), 0.12 (6H, d, *J* 3.5, Si(CH<sub>3</sub>)<sub>2</sub>C(CH<sub>3</sub>)<sub>3</sub>). <sup>13</sup>C NMR (151 MHz, CD<sub>3</sub>OD): δ 220.2 (3-C), 66.1 (CH<sub>2</sub>OTBDMS), 58.8 (6-C), 42.5 (7-C), 41.6 (4-C), 29.1 (8-C), 26.4 (Si(CH<sub>3</sub>)<sub>2</sub>C(CH<sub>3</sub>)<sub>3</sub>), 25.9 (5-C), 19.2 (Si(CH<sub>3</sub>)<sub>2</sub>C(CH<sub>3</sub>)<sub>3</sub>), -5.4 (Si(CH<sub>3</sub>)<sub>2</sub>C(CH<sub>3</sub>)<sub>3</sub>). HRMS (ESI): C<sub>14</sub>H<sub>28</sub>O<sub>2</sub>NSi [M+H]<sup>+</sup>; calculated: 270.1884, found 270.1884. [α]<sub>D</sub><sup>20</sup> = -21 (c. 0.1, MeOH).



**(1S,4S,6S)-6-(Hydroxymethyl)-1-azabicyclo[2.2.2]octan-3-one S-33**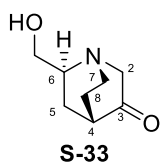

TBAF (1.0 M in THF, 2.9 mL, 1.3 eq.) was added to compound **S-32** (600 mg, 2.23 mmol, 1.0 eq.) in THF (4.5 mL) at 0 °C. The resulting mixture was stirred at rt for 20 h, then a 1:1 sat aq. brine / sat. aq. NaHCO<sub>3</sub> mixture was added (10 mL). The mixture was extracted with CHCl<sub>3</sub> (1 × 20 mL), CHCl<sub>3</sub>:MeOH (9:1, 3 × 20 mL), and CHCl<sub>3</sub>:MeOH (8:2, 3 × 20 mL). The combined organics were dried over MgSO<sub>4</sub>, filtrated and concentrated *in vacuo*. Flash column chromatography eluting with 5% to 10% {50:80:1 CH<sub>2</sub>Cl<sub>2</sub>:EtOH:NH<sub>4</sub>OH} in CH<sub>2</sub>Cl<sub>2</sub>, gave the *title compound S-33* as white solid (191 mg, 1.23 mmol, 55%). **<sup>1</sup>H NMR** (600 MHz, CD<sub>3</sub>OD, OH, 2-H not observed): δ 3.71 (dd, *J* 11.5, 8.2 Hz, 1H, CH<sub>A</sub>H<sub>B</sub>OH), 3.61 (dd, *J* 11.5, 6.0 Hz, 1H, CH<sub>A</sub>H<sub>B</sub>OH), 3.23 (ddd, *J* 14.3, 10.2, 5.5 Hz, 1H, quinuclidine 7-H<sub>A</sub>), 3.07-2.98 (m, 1H, quinuclidine 6-H), 2.84-2.74 (m, 1H, quinuclidine 7-H<sub>B</sub>), 2.39-2.35 (m, 1H, quinuclidine 4-H), 2.11-2.03 (m, 1H, quinuclidine 5-H<sub>A</sub>), 2.00-1.94 (m, 1H, quinuclidine 8-H<sub>A</sub>), 1.94-1.88 (m, 1H, quinuclidine 8-H<sub>B</sub>), 1.62 (ddd, *J* 13.5, 7.5, 2.3 Hz, 1H, quinuclidine 5-H<sub>B</sub>). **<sup>13</sup>C NMR** (151 MHz, CD<sub>3</sub>OD): δ 220.5 (quinuclidine 3-C), 98.2 (quinuclidine 2-C), 64.0 (CH<sub>2</sub>OH), 58.8 (quinuclidine 6-C), 41.5 (quinuclidine 4-C), 41.2 (quinuclidine 7-C), 29.7 (quinuclidine 5-C), 26.0 (quinuclidine 8-C). **HRMS** (ESI): C<sub>8</sub>H<sub>14</sub>O<sub>2</sub>N [M+H]<sup>+</sup>; calculated: 156.1019, found: 156.1016. [α]<sub>D</sub><sup>20</sup> = -27 (c. 0.1, MeOH).

**[(11*S*, 13*S*)-5-Bromo-6-methyl-1,7,9-triazatetracyclo[9.2.2.0<sub>2,10</sub>.0<sub>3,8</sub>]pentadeca-2(10),3,5,7-tetraen-13-yl]methanol **S-5****

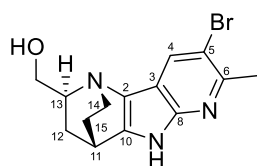

**S-5**

Prepared according to General Procedure B using ketone **S-33** (100 mg, 0.35 mmol, 1.0 eq.) and 20 mol% Pd(OAc)<sub>2</sub>. Flash column chromatography eluting with 5-15% {50:80:1 CH<sub>2</sub>Cl<sub>2</sub>:EtOH:NH<sub>4</sub>OH} in CH<sub>2</sub>Cl<sub>2</sub> gave the *title compound S-5* (53 mg, 0.17 mmol, 26%) as a yellow solid. **<sup>1</sup>H NMR** (600 MHz, CD<sub>3</sub>OD, NH and OH not observed): δ 8.16 (1H, s, 4-H), 3.85 (1H, dd, *J* 11.4, 8.1, CH<sub>A</sub>H<sub>B</sub>OH), 3.77 (1H, dd, *J* 11.4, 6.1 Hz, CH<sub>A</sub>H<sub>B</sub>OH), 3.50-3.44 (1H, m, 14-H<sub>A</sub>), 3.42-3.39 (1H, m, 11-H), 2.89-2.82 (1H, m, 13-H), 2.65 (3H, s, CH<sub>3</sub>), 2.53-2.44 (1H, m, 14-H<sub>B</sub>), 1.96-1.90 (1H, m, 15-H<sub>A</sub>), 1.84-1.77 (1H, m, 12-H<sub>A</sub>), 1.62-1.55 (1H, m, 15-H<sub>B</sub>), 1.55-1.50 (1H, m, 12-H<sub>B</sub>). **<sup>13</sup>C NMR** (151 MHz, CD<sub>3</sub>OD): δ 148.0 (Ar-C<sub>q</sub>), 145.8 (Ar-C<sub>q</sub>), 145.4 (Ar-C<sub>q</sub>), 129.2 (4-C), 125.1 (Ar-C<sub>q</sub>), 115.6 (Ar-C<sub>q</sub>), 113.6 (Ar-C<sub>q</sub>), 64.6 (CH<sub>2</sub>OH), 64.4 (13-H), 45.7 (14-C), 33.5 (12-C), 30.3 (15-C), 28.9 (11-C), 24.7 (CH<sub>3</sub>). **HRMS** (ESI): C<sub>14</sub>H<sub>17</sub>ON<sub>3</sub><sup>79</sup>Br [M+H]<sup>+</sup>; calculated: 322.0549, found: 322.0554; C<sub>14</sub>H<sub>17</sub>ON<sub>3</sub><sup>81</sup>Br [M+H]<sup>+</sup>; calculated: 324.0529, found: 324.0527. [α]<sub>D</sub><sup>20</sup> = -36 (c. 0.1, MeOH).

## 6.3.2.5.5 Preparation of compound S-6

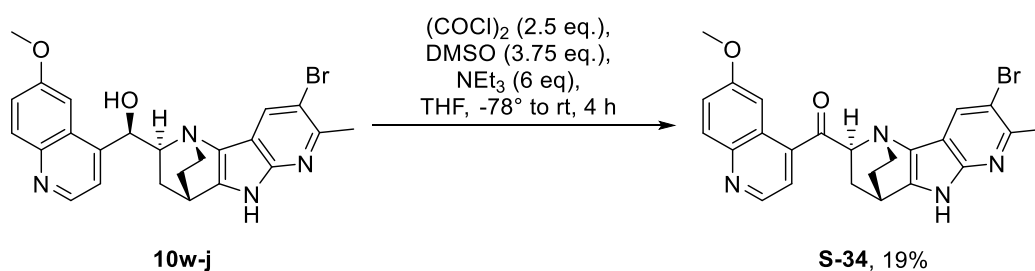

**(13S)-5-Bromo-13-(6-methoxyquinoline-4-carbonyl)-6-methyl-1,9-diazatetracyclo [9.2.2.0<sup>2,10</sup>.0<sup>3,8</sup>]pentadeca-2(10),3,5,7-tetraene S-6**

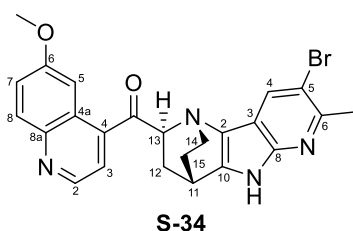

DMSO (22.2  $\mu\text{L}$ , 313  $\mu\text{mol}$ , 3 eq.) in THF (800  $\mu\text{L}$ ) was cooled to  $-78^\circ\text{C}$ . Oxalylchloride (17.9  $\mu\text{L}$  0.21 mmol, 2.5 eq.) was added slowly and the mixture was stirred for 0.5 h at  $-78^\circ\text{C}$ . Compound **10w-j** (Azaquinole-1, 40 mg, 83  $\mu\text{mol}$ ) was dissolved in THF (0.1 M, 800  $\mu\text{L}$ ) and added dropwise. The mixture was stirred for 0.5 h at  $-78^\circ\text{C}$ , then  $\text{Et}_3\text{N}$  (69.8  $\mu\text{L}$ ,

0.50 mmol, 6.0 eq.) was added dropwise. The mixture was stirred at  $-78^\circ\text{C}$  for 0.5 h, at  $0^\circ\text{C}$  for 0.5 h and at rt for 2 h. Purification by mass-directed preparative HPLC (MeCN in  $\text{H}_2\text{O}$  + 0.1% TFA;  $R_t$  = 14 min) followed by column chromatography eluting with 10-50% {50:80:1  $\text{CH}_2\text{Cl}_2$ :EtOH: $\text{NH}_4\text{OH}$ } in  $\text{CH}_2\text{Cl}_2$  gave the *title compound* **S-34** as an orange solid (7.4 mg, 15.5  $\mu\text{mol}$ , 19%). **<sup>1</sup>H NMR** (600 MHz,  $\text{Cl}_3\text{CD}$ ):  $\delta$  8.95 (1H, d,  $J$  4.4, quinoline 2-H), 8.87 (1H, s, NH), 8.04 (1H, d,  $J$  9.2, quinoline 8-H), 7.69 (1H, d,  $J$  4.4, quinoline 3-H), 7.31 (1H, dd,  $J$  9.2, 2.8, quinolone 7-H), 6.55 (1H, s, indole 4-H), 6.30 (1H, d,  $J$  2.9, quinoline 5-H), 4.66 (1H, dd,  $J$  8.4, 4.2, 13-H), 3.60-3.57 (1H, m, 11-H), 3.44-3.38 (1H, m, 14-H<sub>A</sub>), 3.24 (3H, s,  $\text{OCH}_3$ ), 2.73-2.67 (1H, m, 14-H<sub>B</sub>), 2.66-2.62 (1H, m, 12-H<sub>A</sub>), 2.61 (3H, s,  $\text{CH}_3$ ), 2.22-2.17 (1H, m, 12-H<sub>B</sub>), 2.09-2.03 (1H, m, 15-H<sub>A</sub>), 1.66-1.59 (1H, m, 15-H<sub>B</sub>). **<sup>13</sup>C NMR** (126 MHz,  $\text{Cl}_3\text{CD}$ ):  $\delta$  202.2 (C=O), 158.5 (quinoline 6-C), 148.0 (Ar-C<sub>q</sub>), 146.8 (quinoline 2-C), 145.6 (Ar-C<sub>q</sub>), 144.5 (Ar-C<sub>q</sub>), 143.6 (Ar-C<sub>q</sub>), 142.0 (Ar-C<sub>q</sub>), 131.3 (quinolone 8-C), 128.4 (indole 4-C), 125.4 (Ar-C<sub>q</sub>), 123.1 (quinoline 7-C), 120.8 (Ar-C<sub>q</sub>), 119.5 (quinoline 3-C), 115.2 (Ar-C<sub>q</sub>), 113.5 (Ar-C<sub>q</sub>), 102.2 (quinoline 5-C), 67.6 (13-C), 54.8 ( $\text{OCH}_3$ ), 51.7 (14-C), 31.0 (12-C), 29.6 (15-C), 28.2 (11-C), 24.9 ( $\text{CH}_3$ ). **HRMS** (ESI):  $\text{C}_{24}\text{H}_{22}\text{O}_2\text{N}_4^{79}\text{Br}$  [ $\text{M}+\text{H}$ ]<sup>+</sup>; calculated: 477.0921; found: 477.0907;  $\text{C}_{24}\text{H}_{22}\text{O}_2\text{N}_4^{81}\text{Br}$  [ $\text{M}+\text{H}$ ]<sup>+</sup>; calculated: 479.0900, found: 479.0887.  $[\alpha]_{\text{D}}^{20}$  +48 (c 0.1, MeCN).

## 7.0 Processed NMR Spectra

Compounds are listed in order of appearance within the Supporting Information.

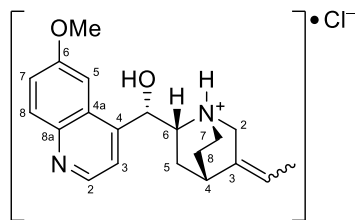

7

148

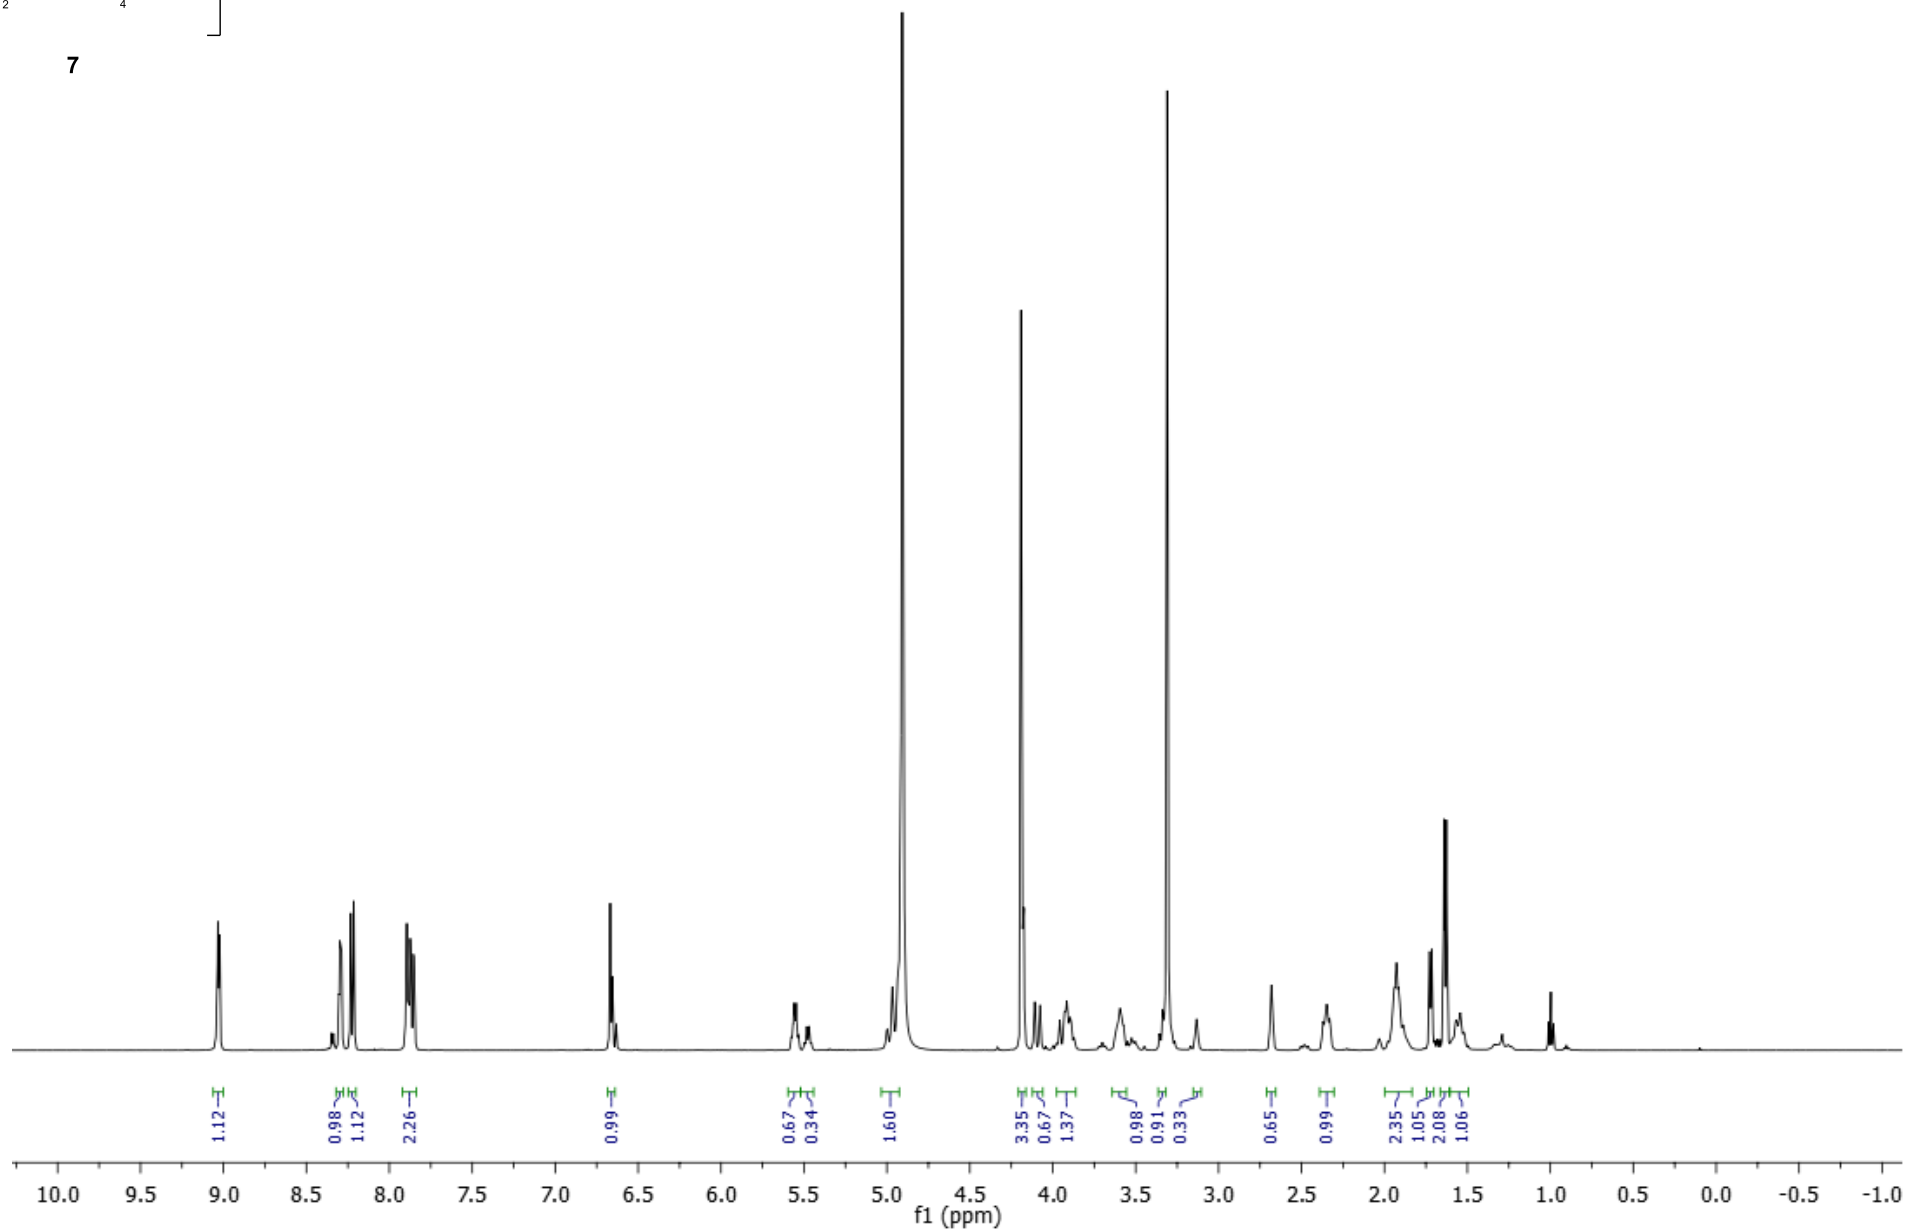

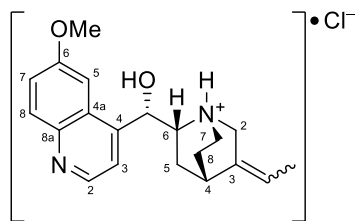

7

149

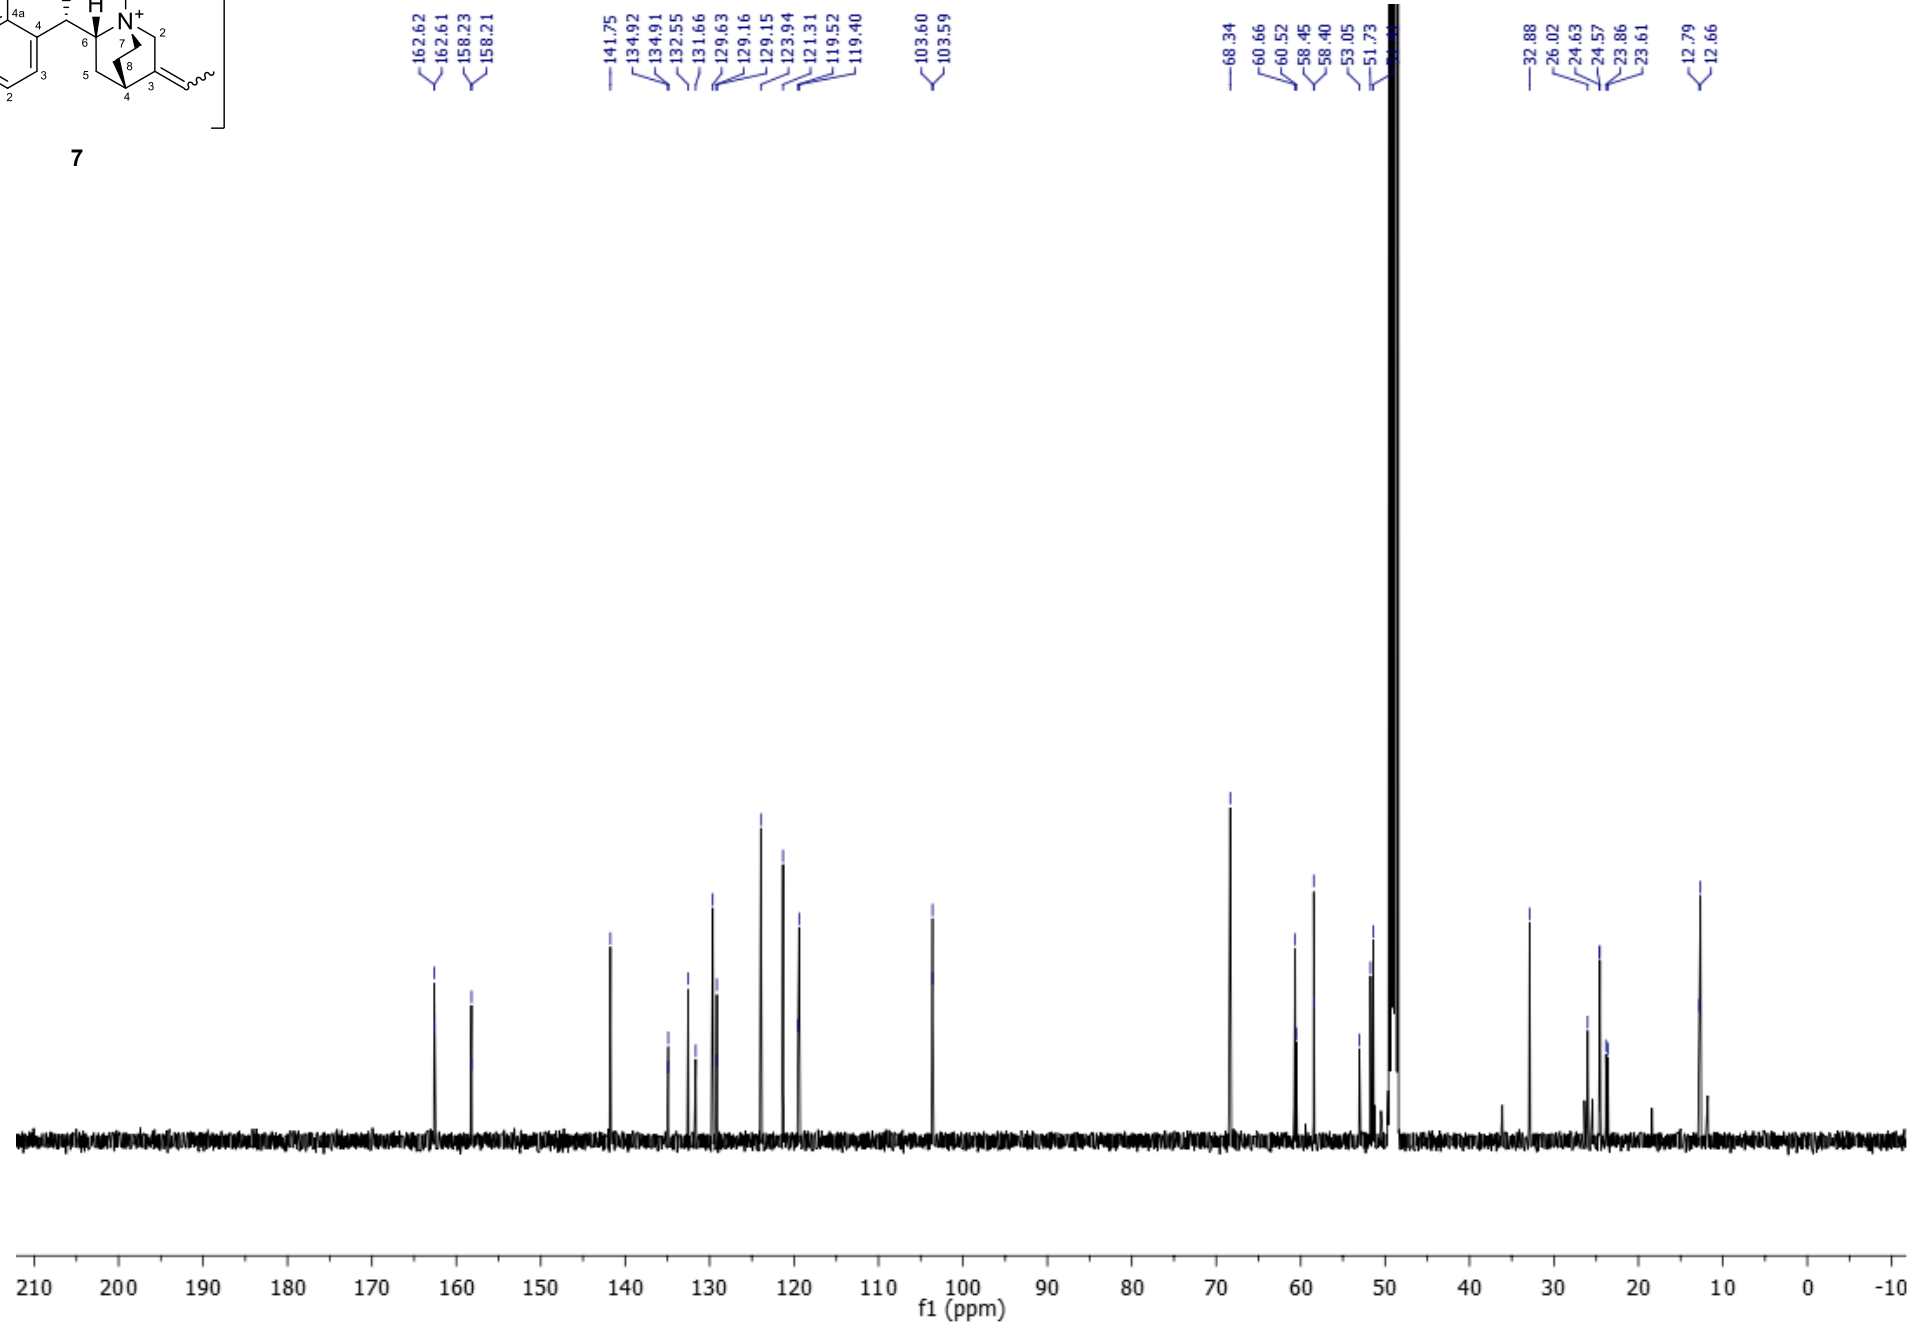

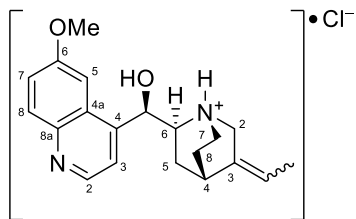

8

150

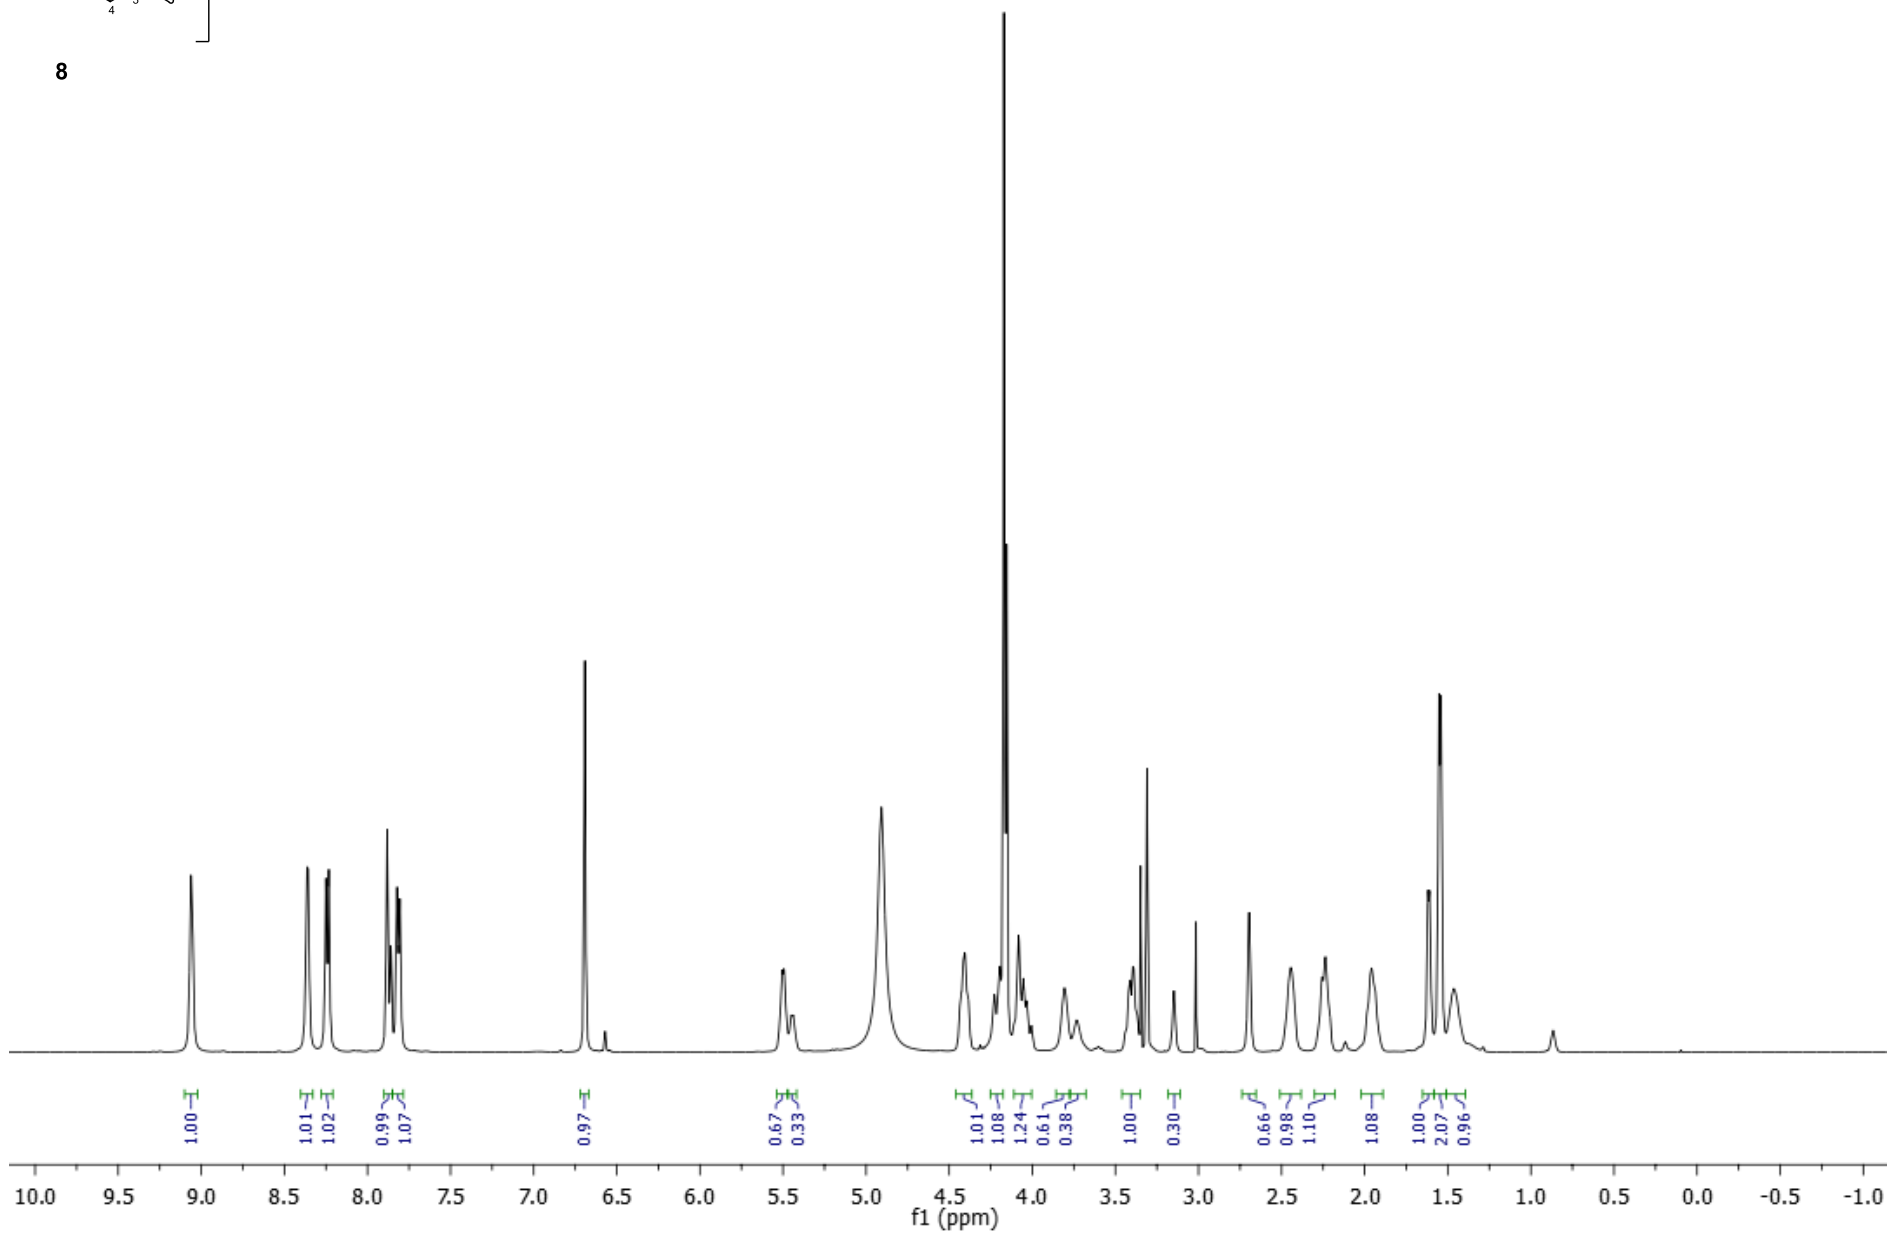

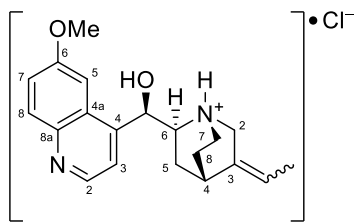

8

151

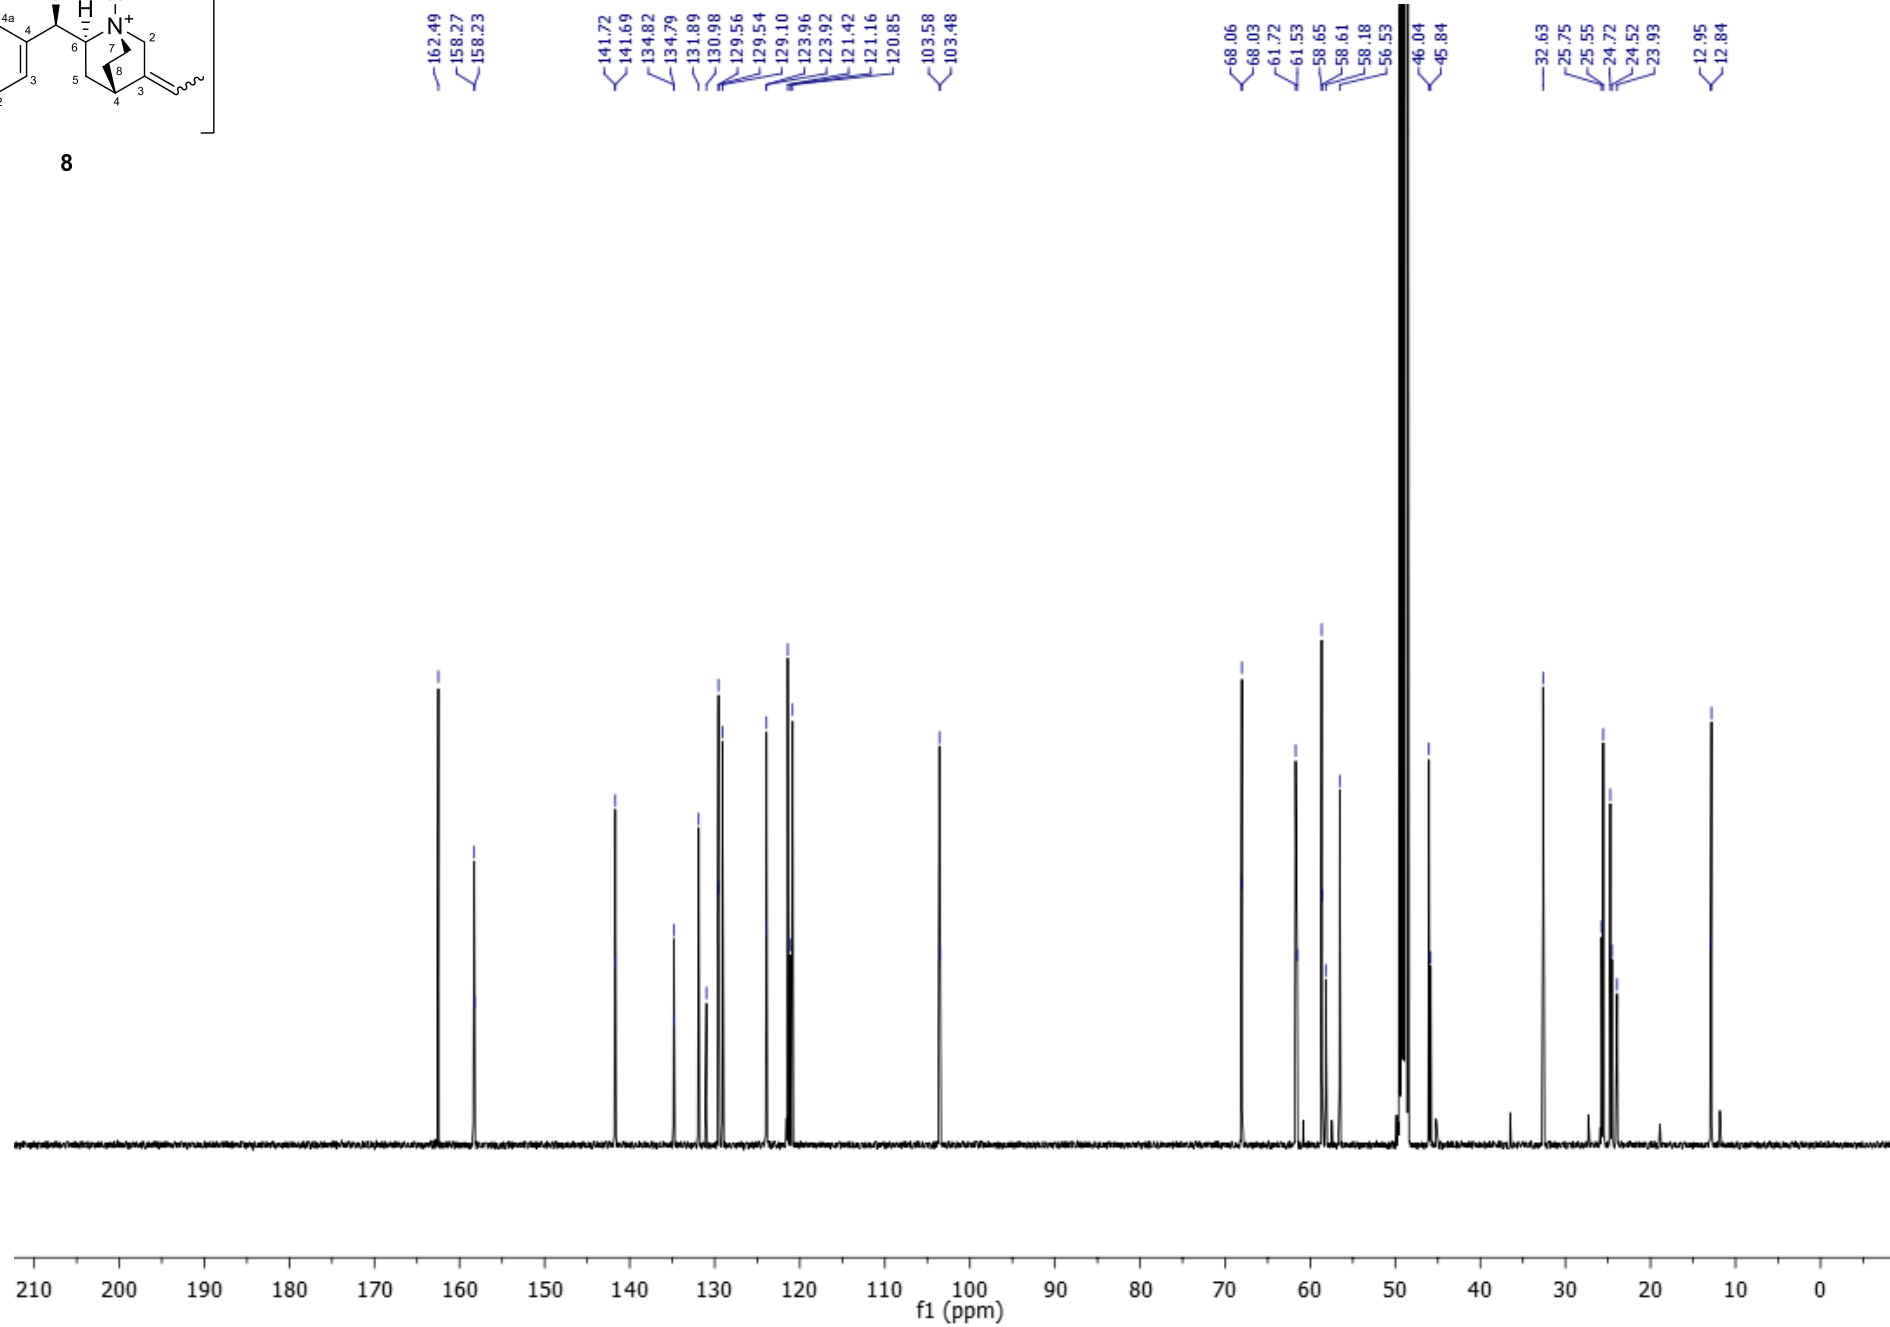



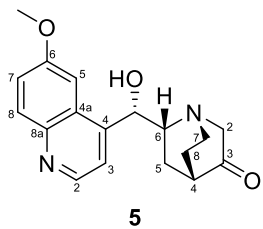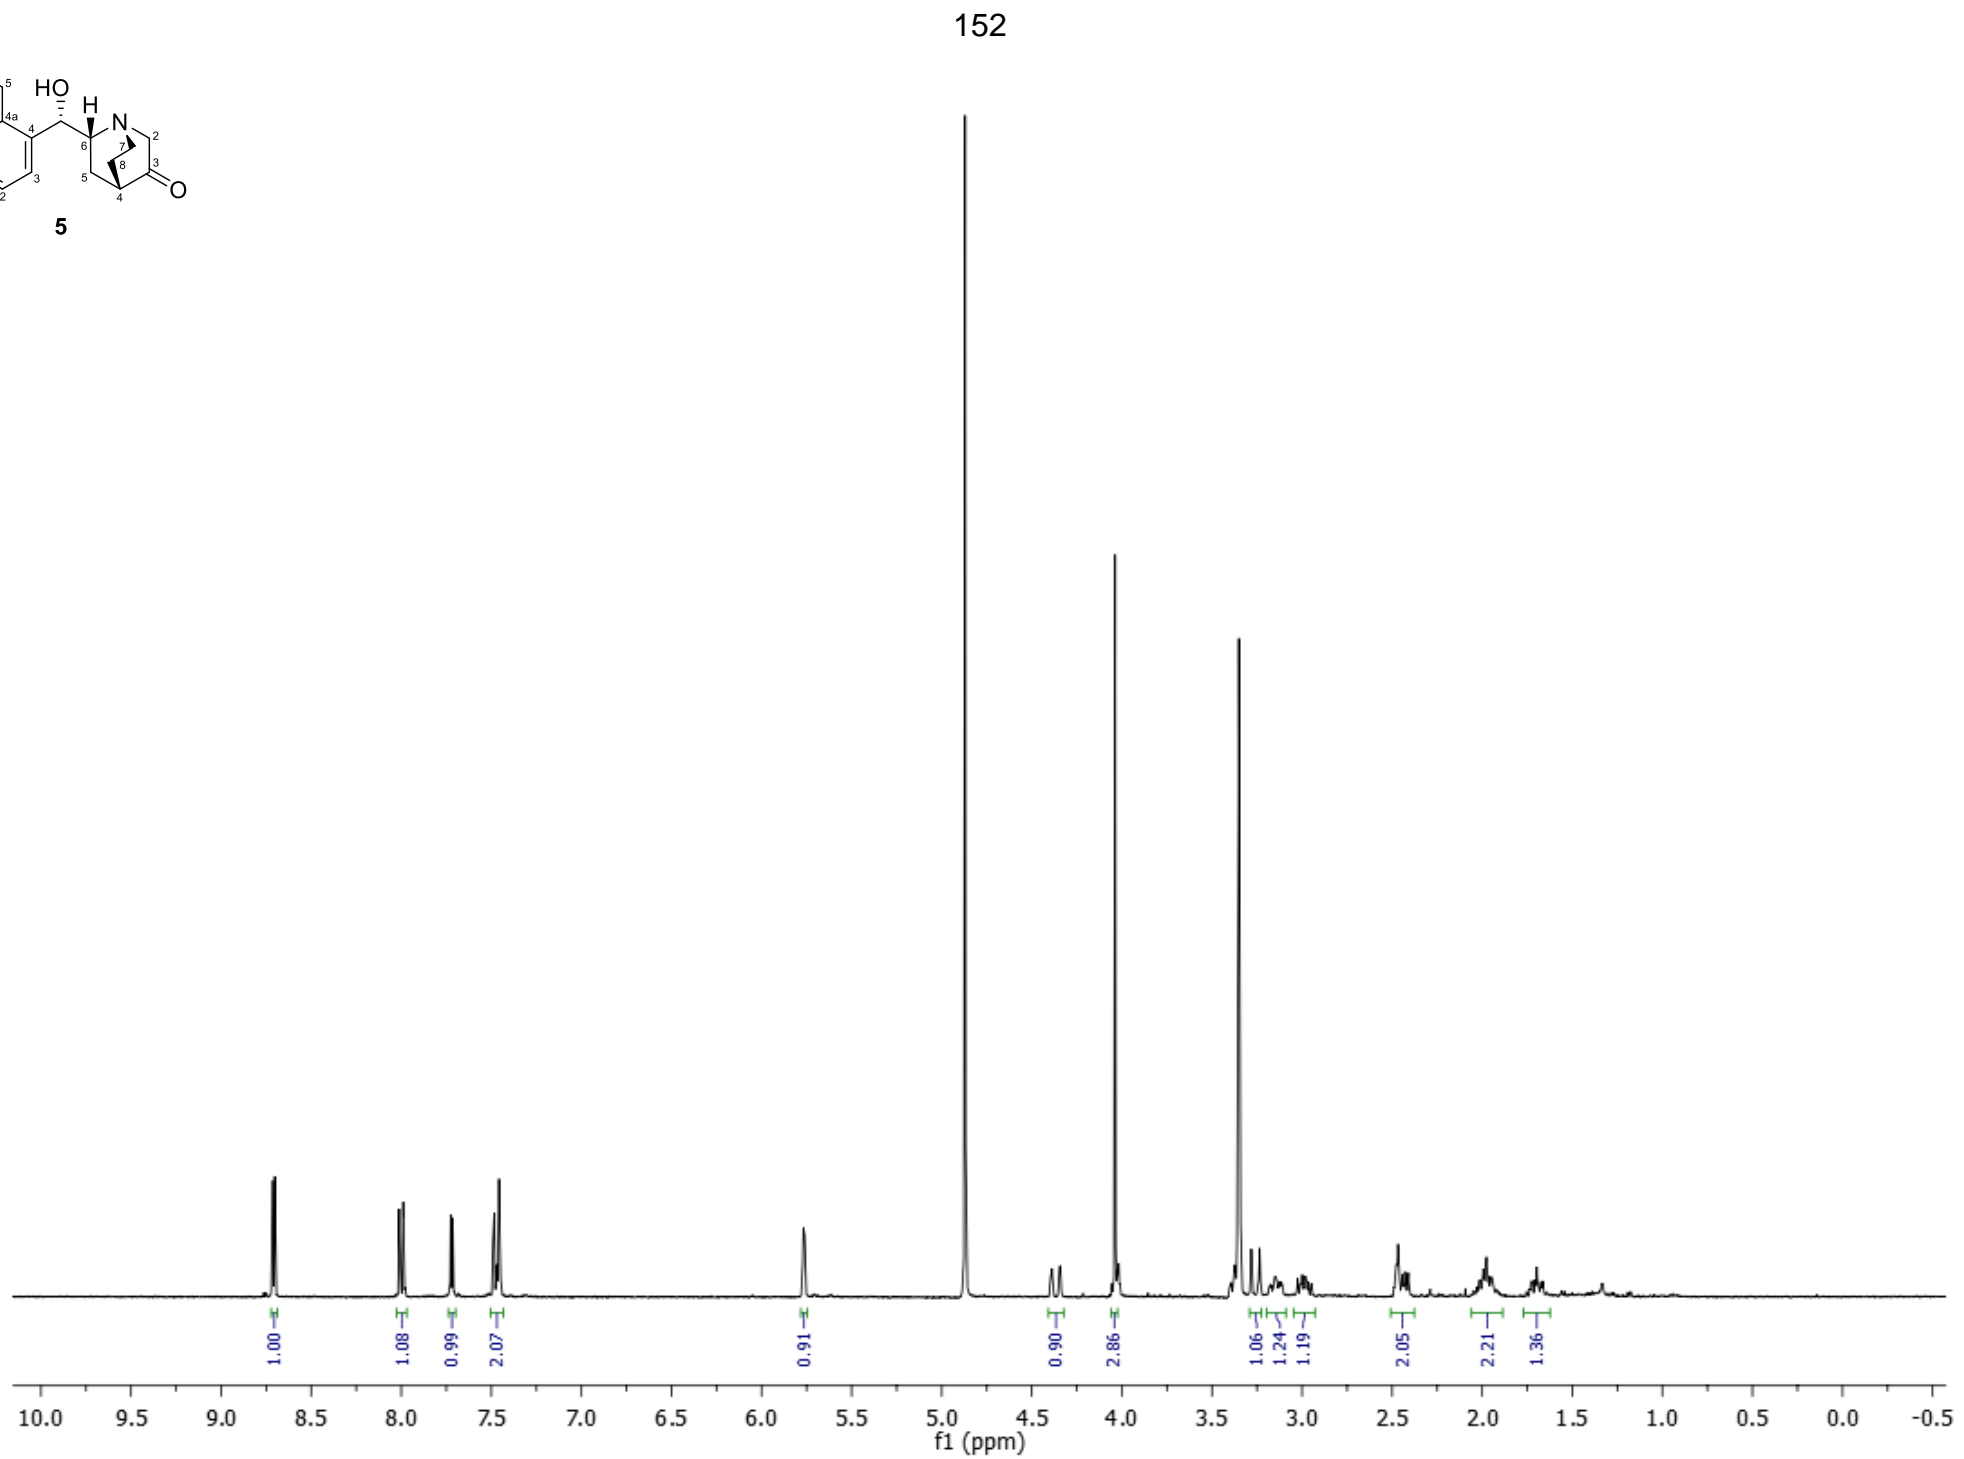

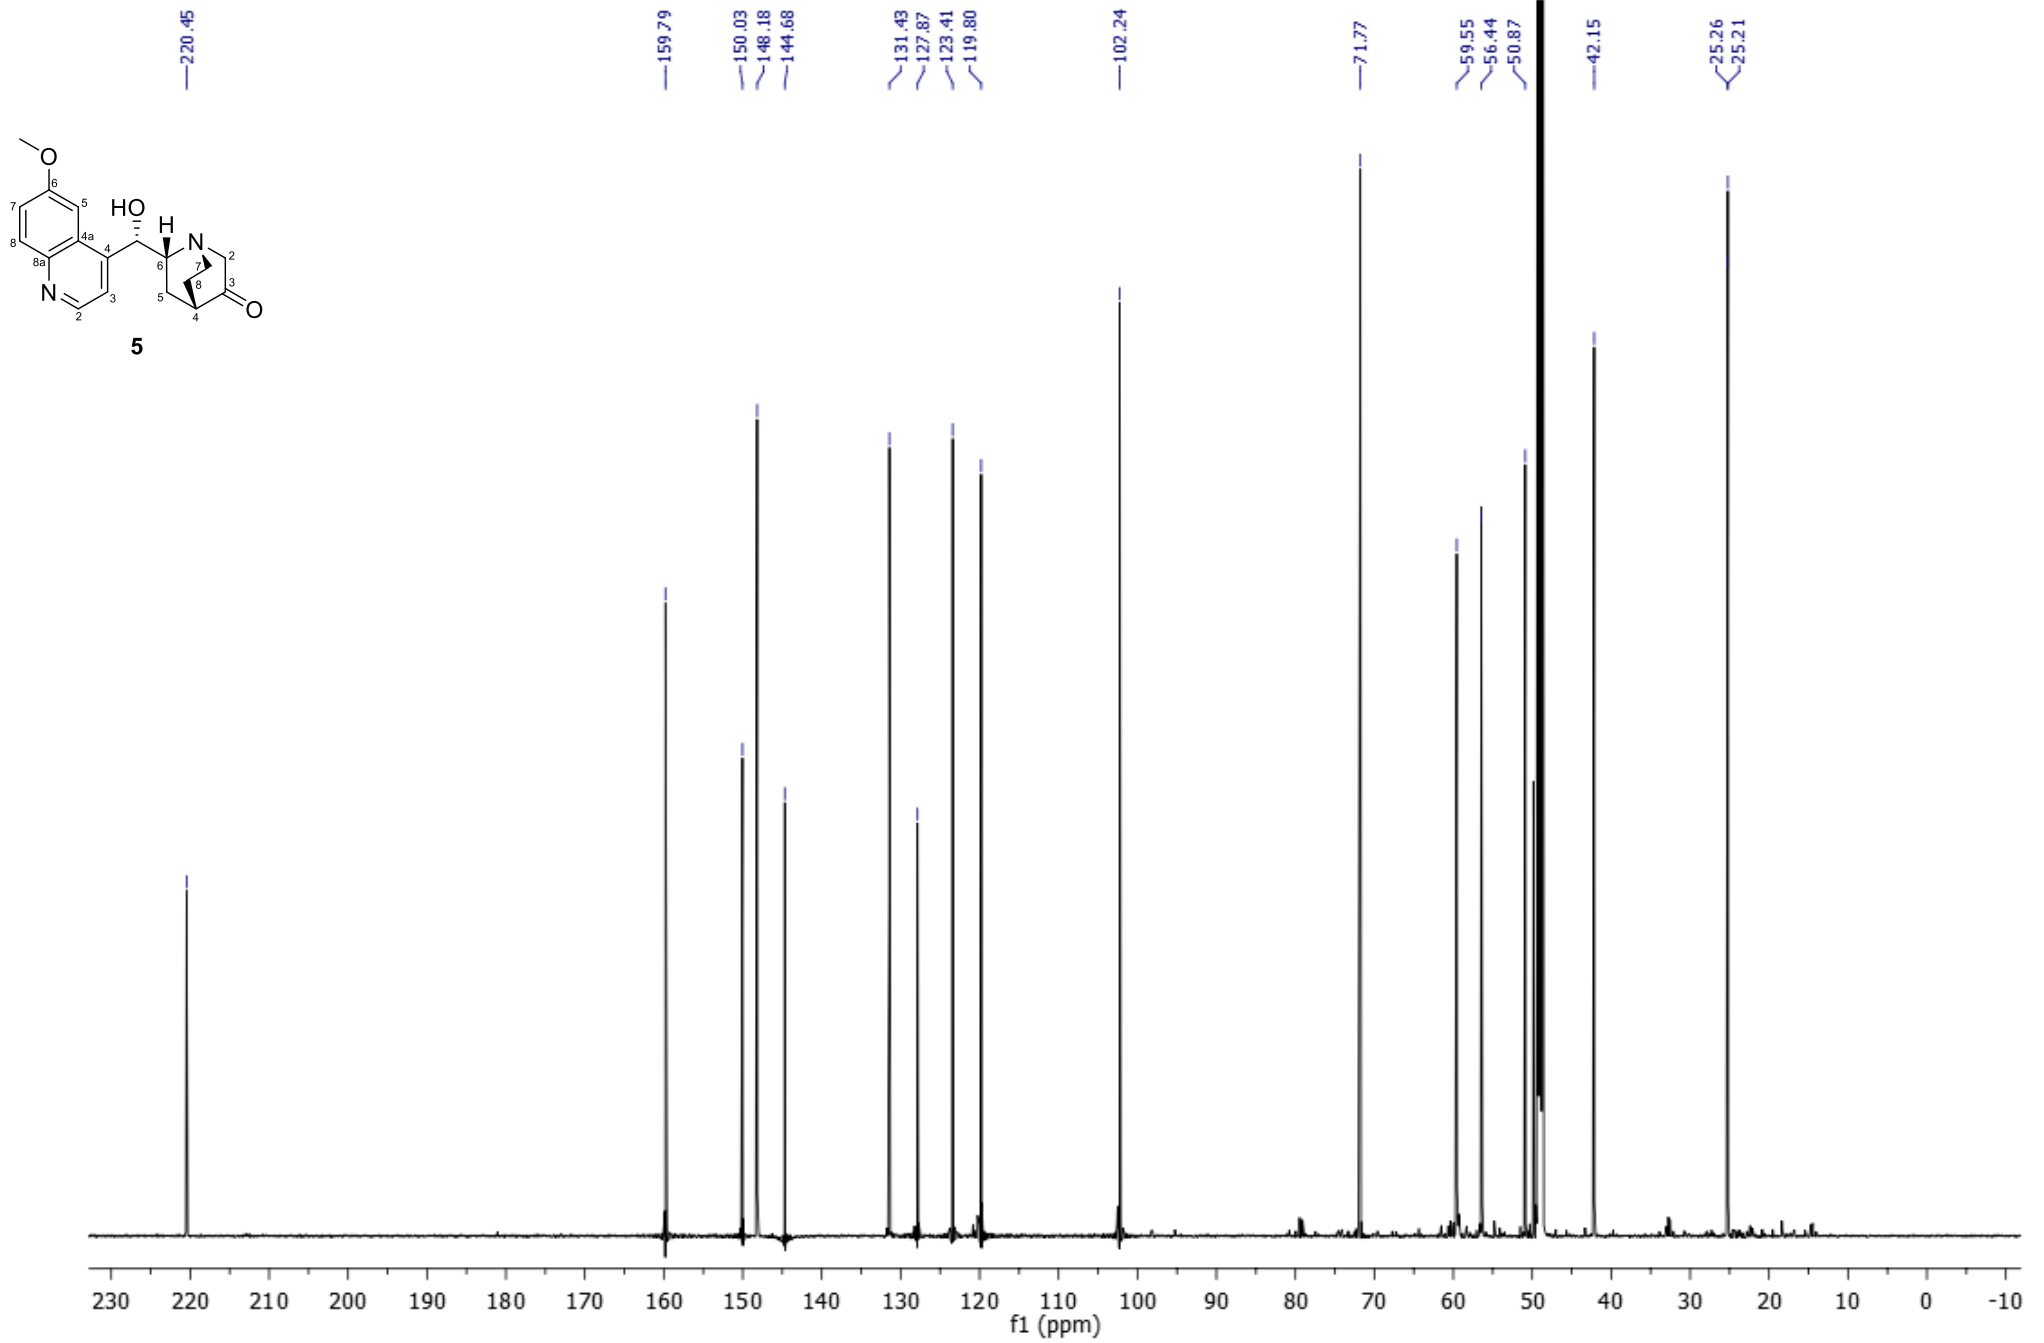

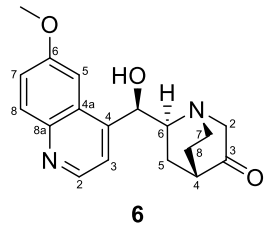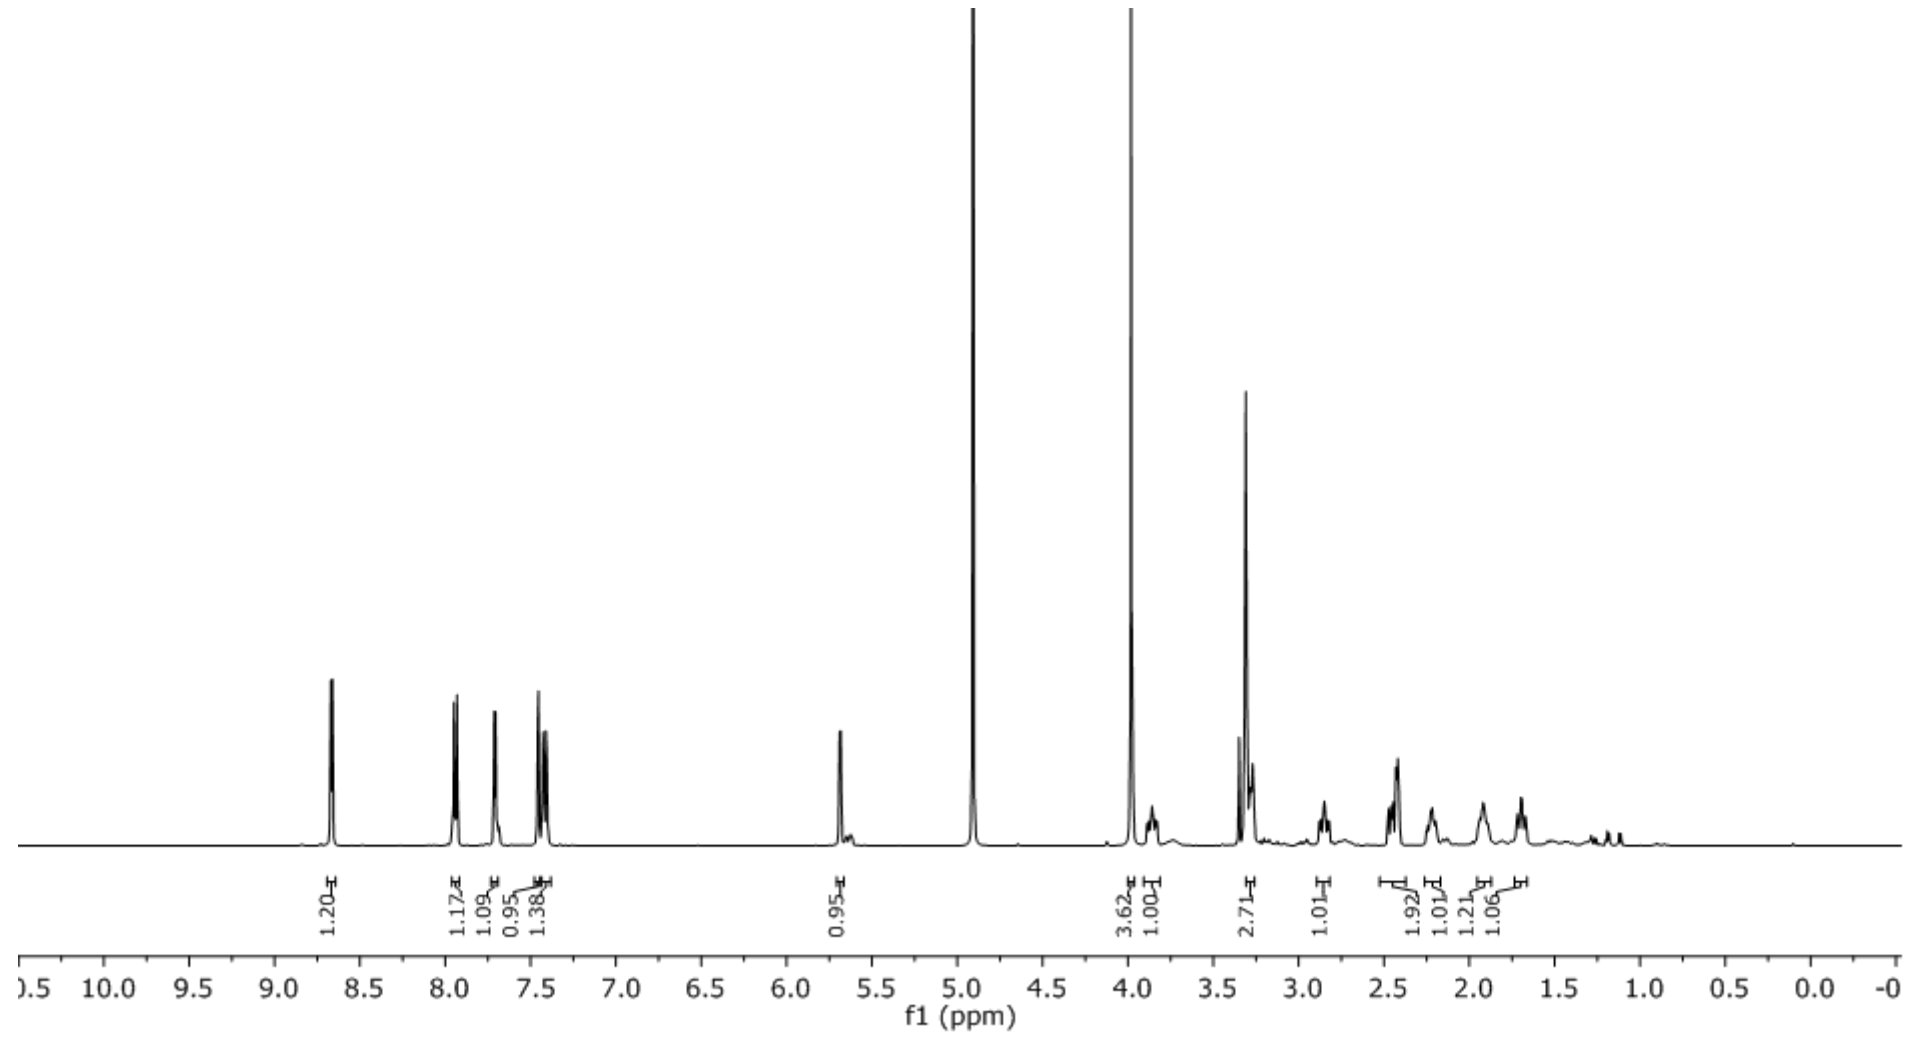

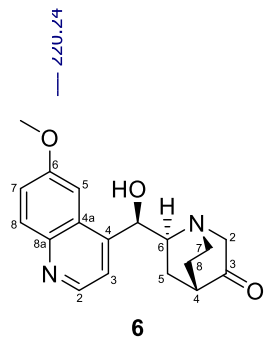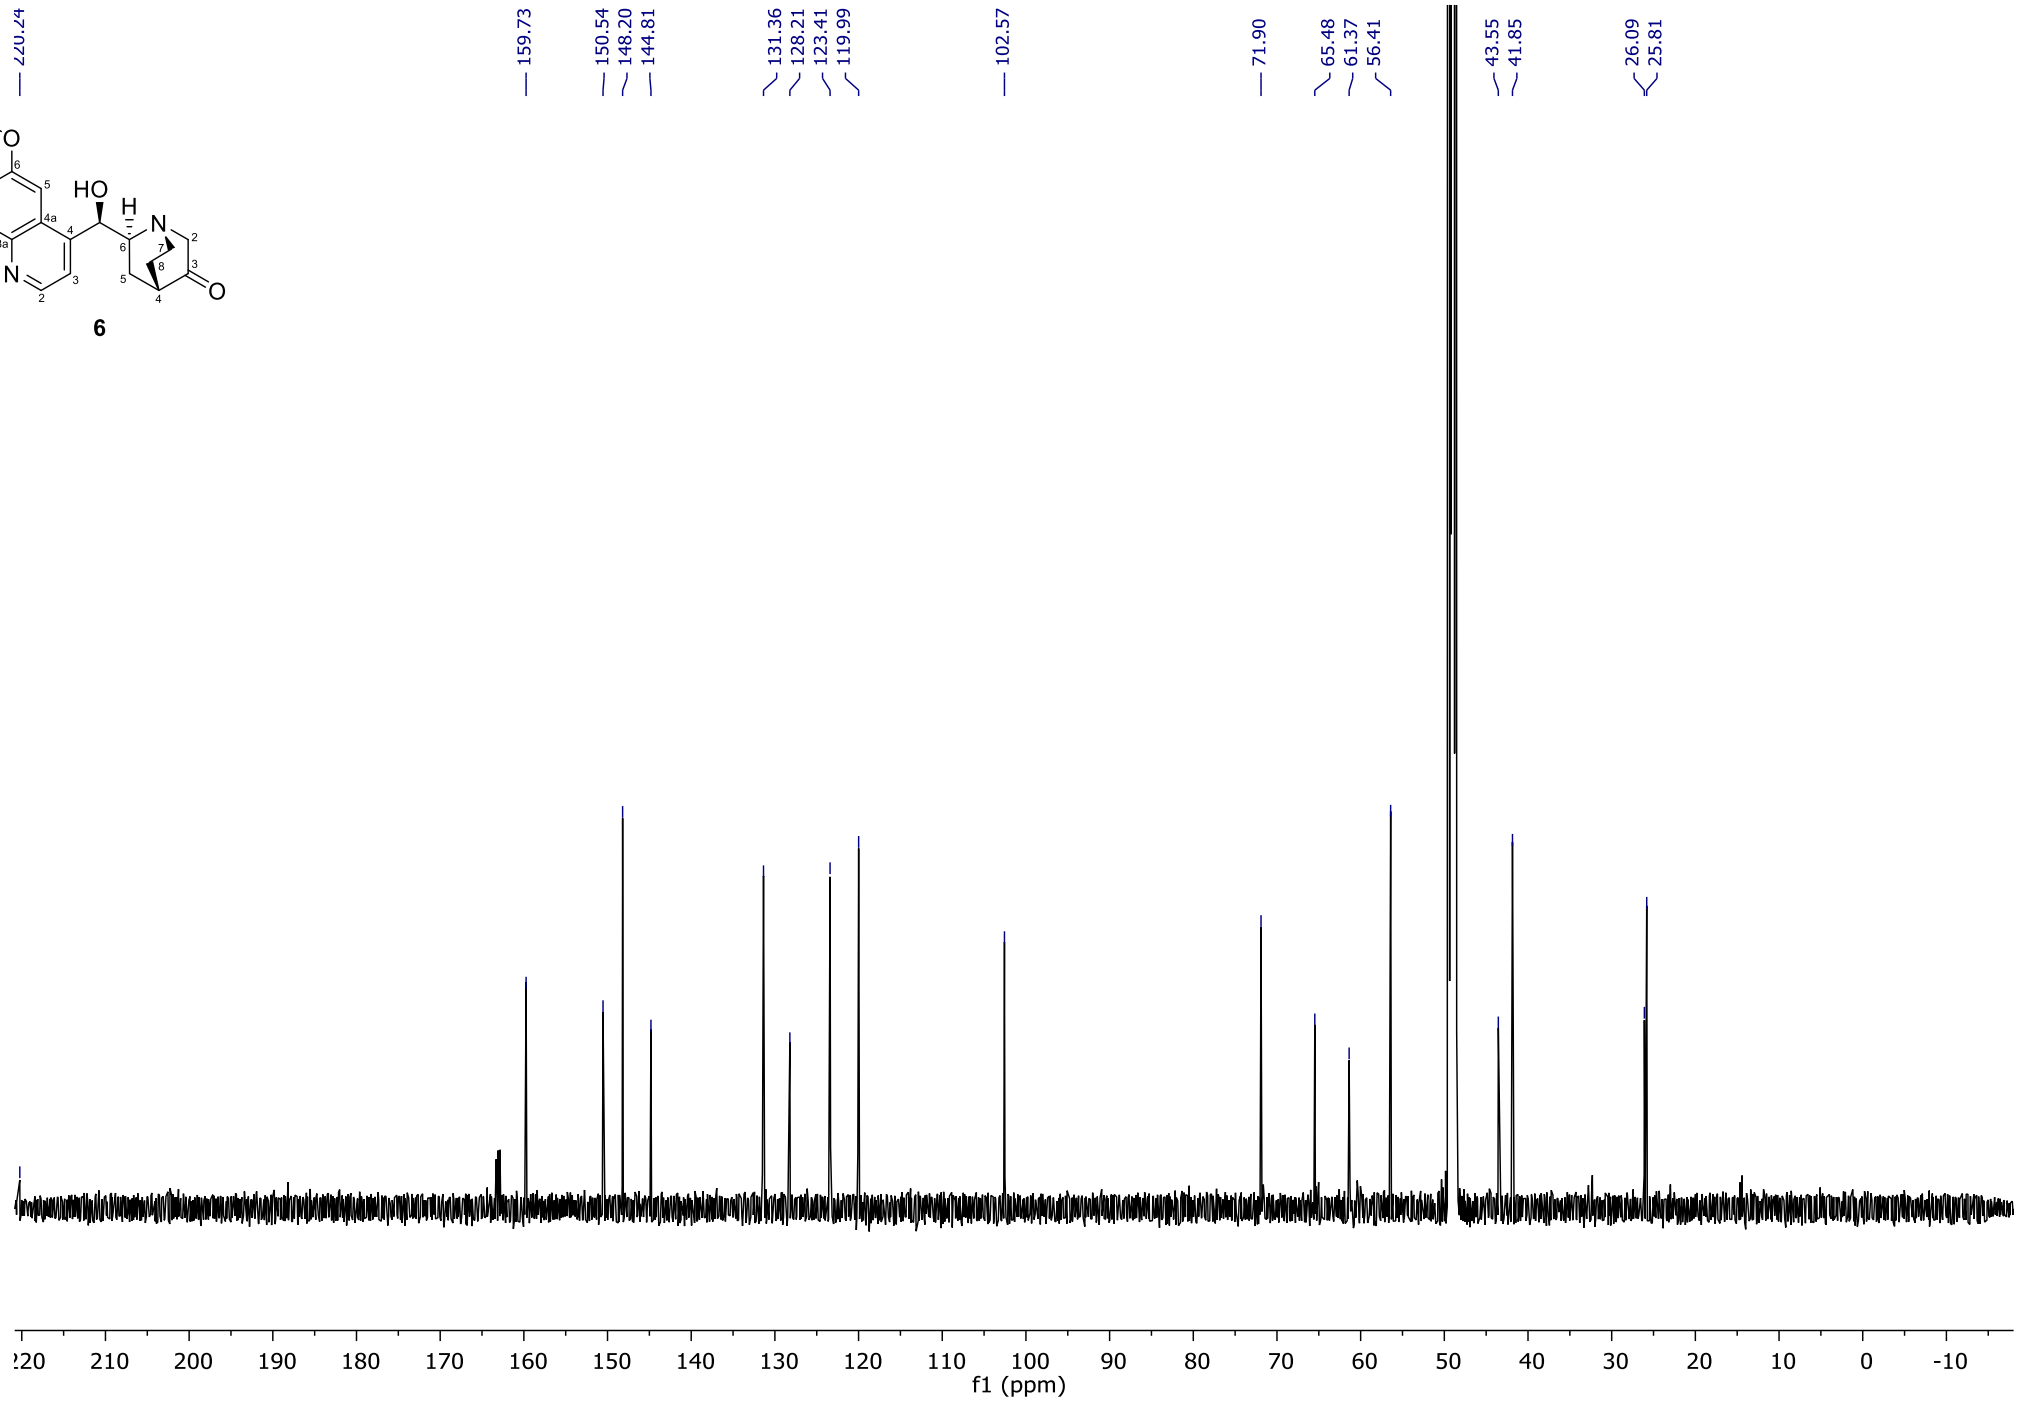

156

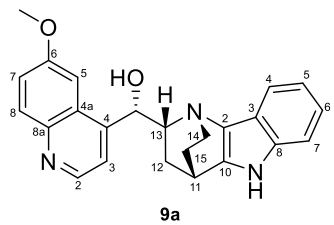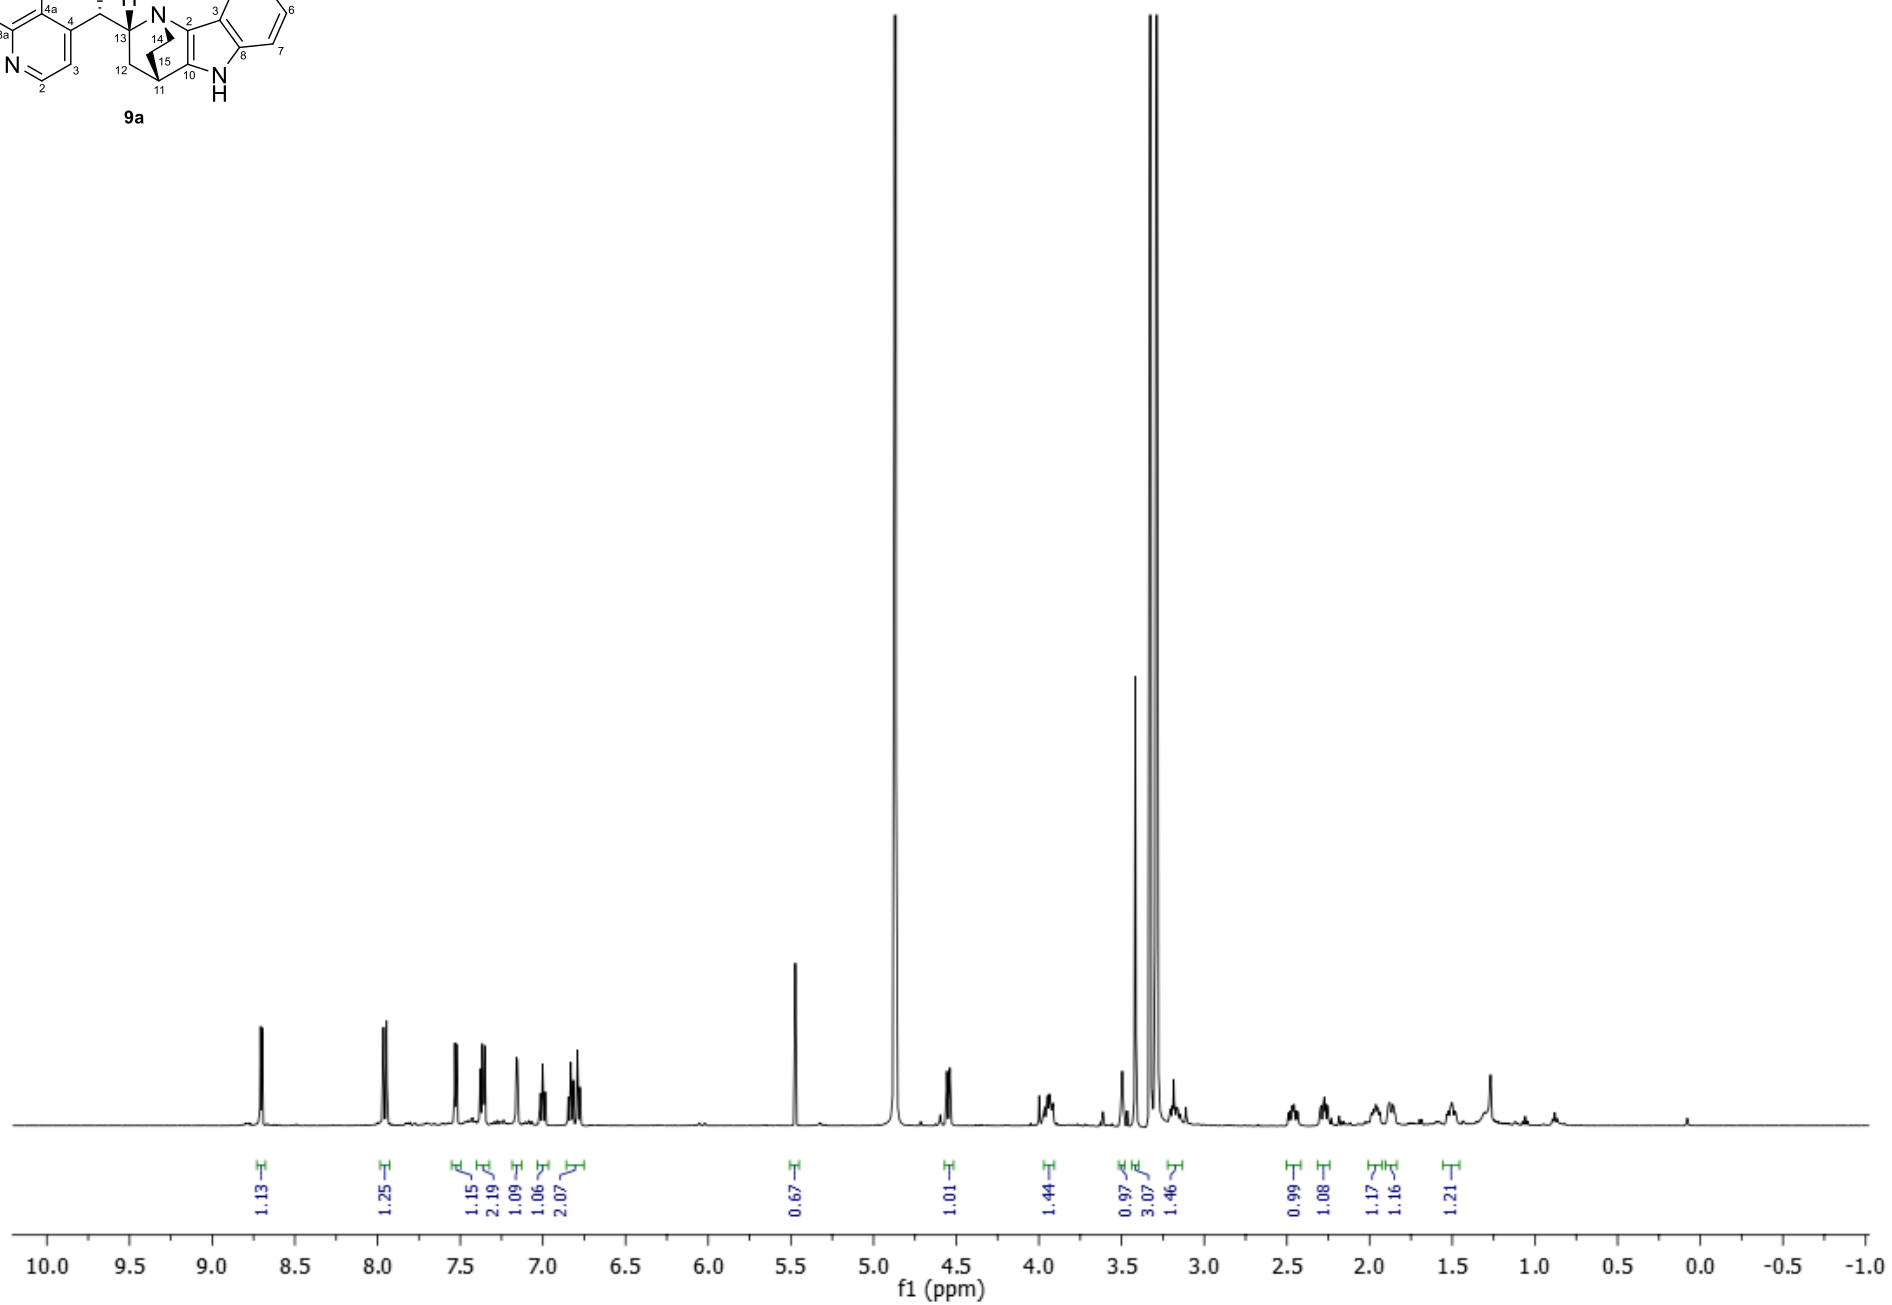

157

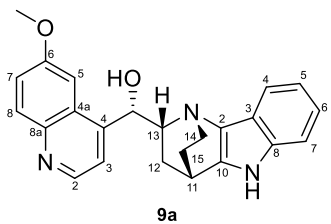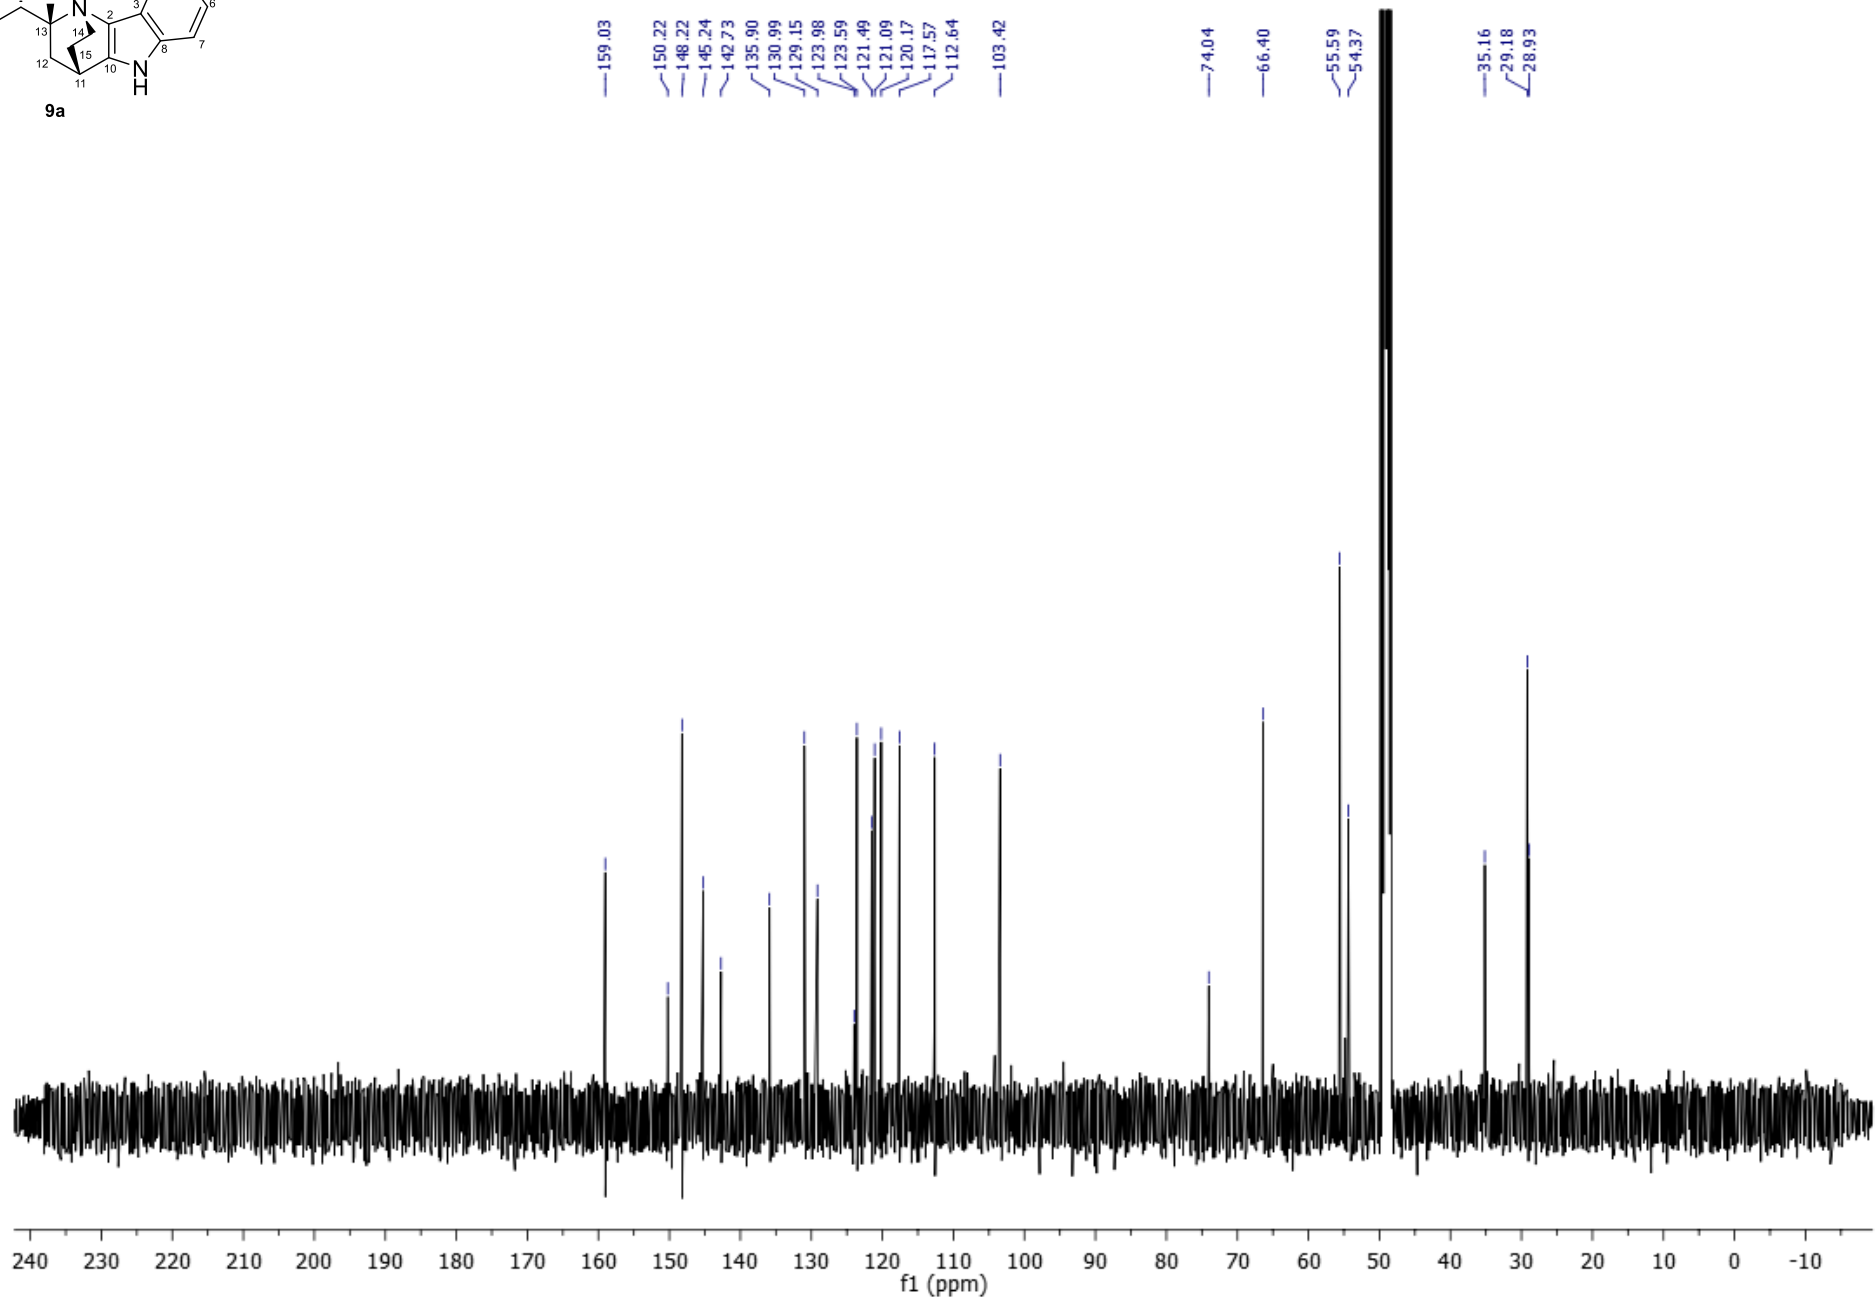

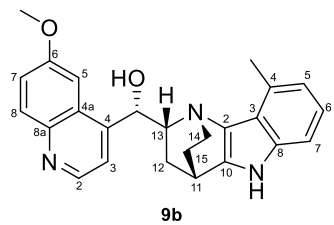

158

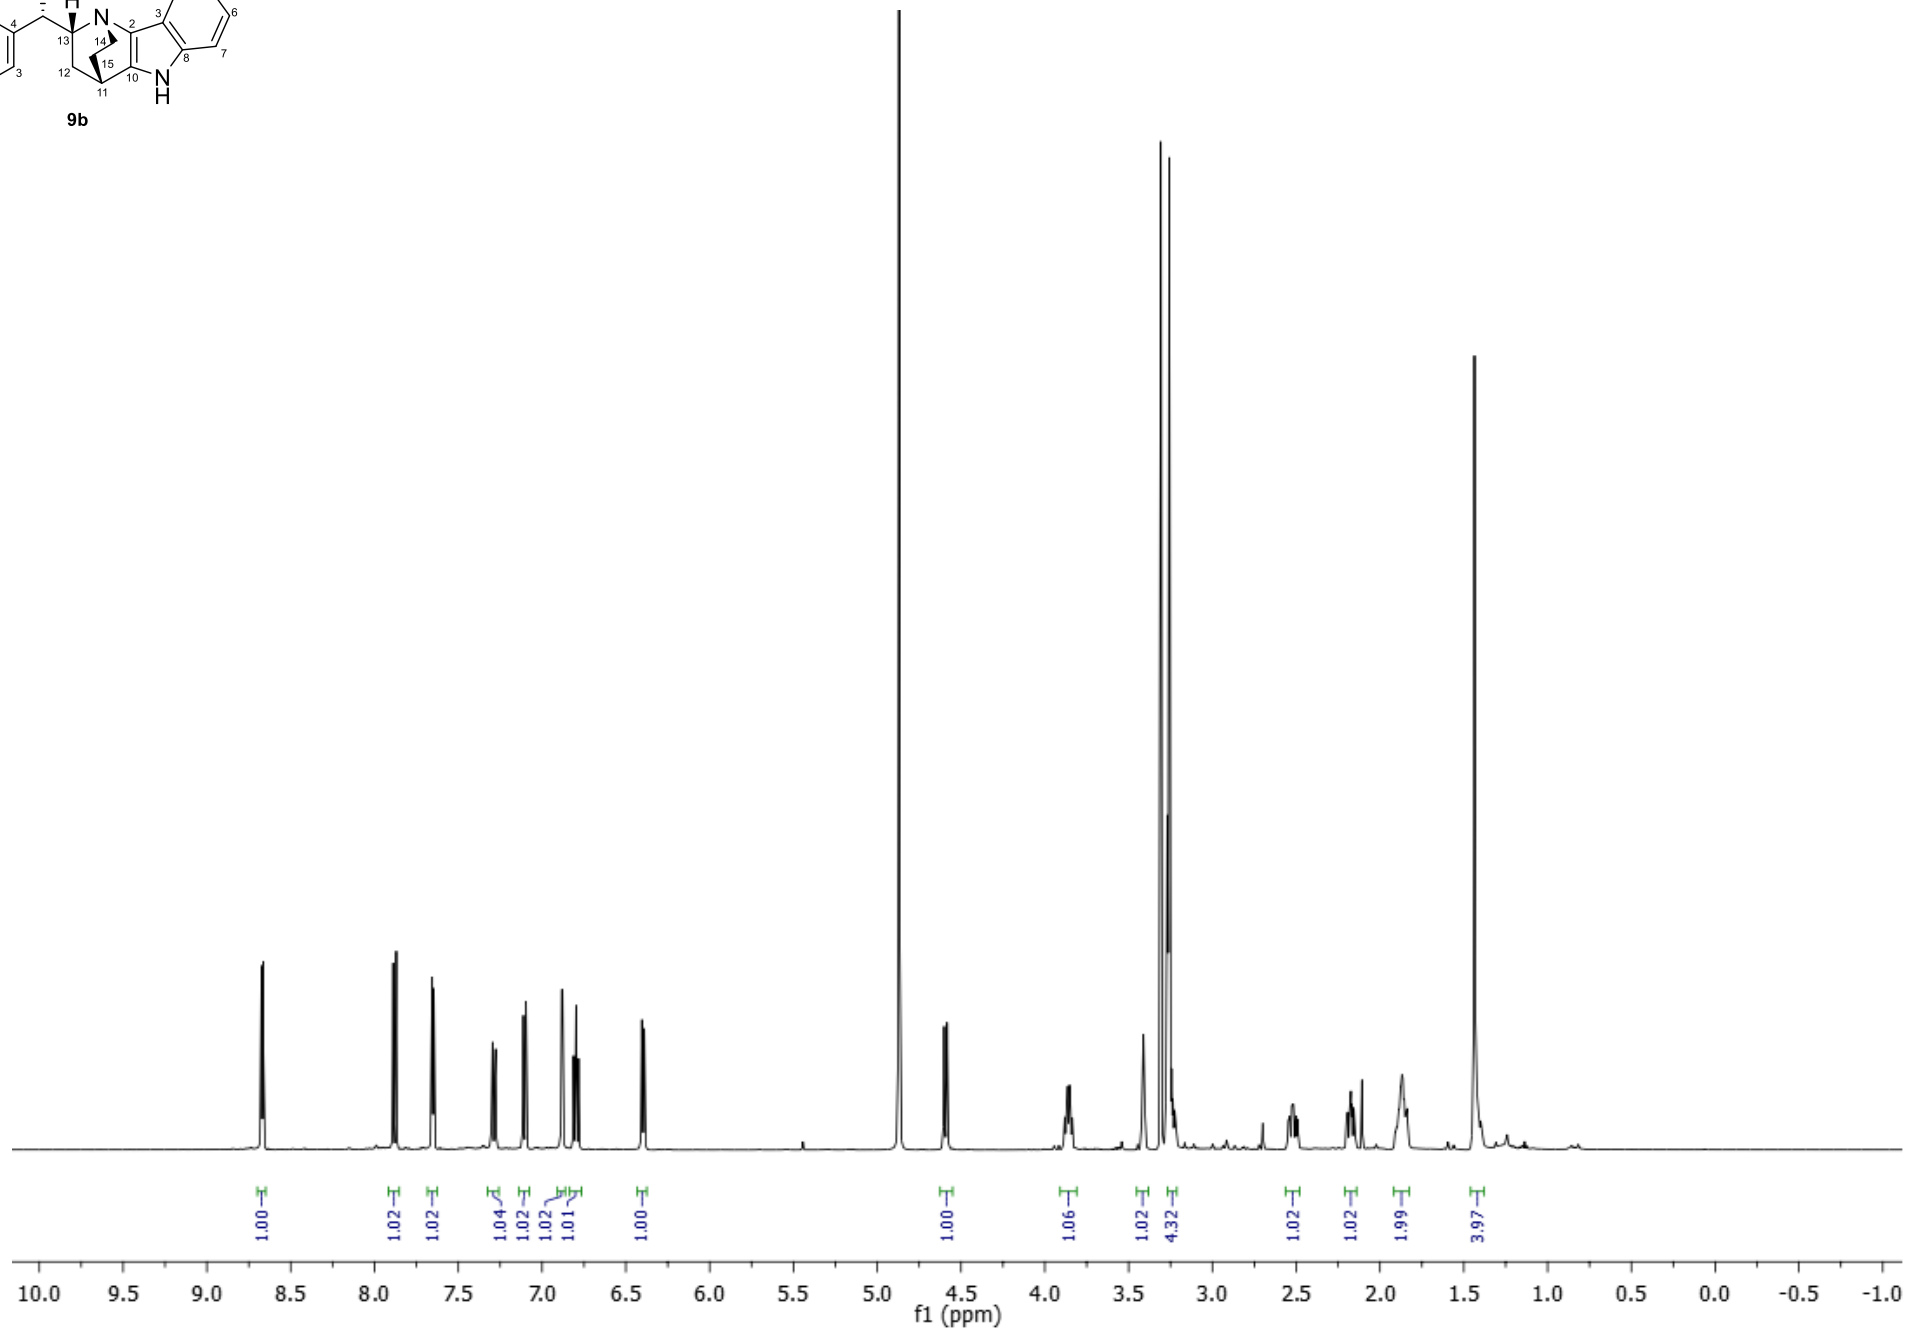

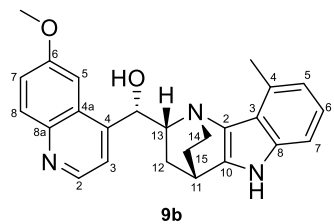

159

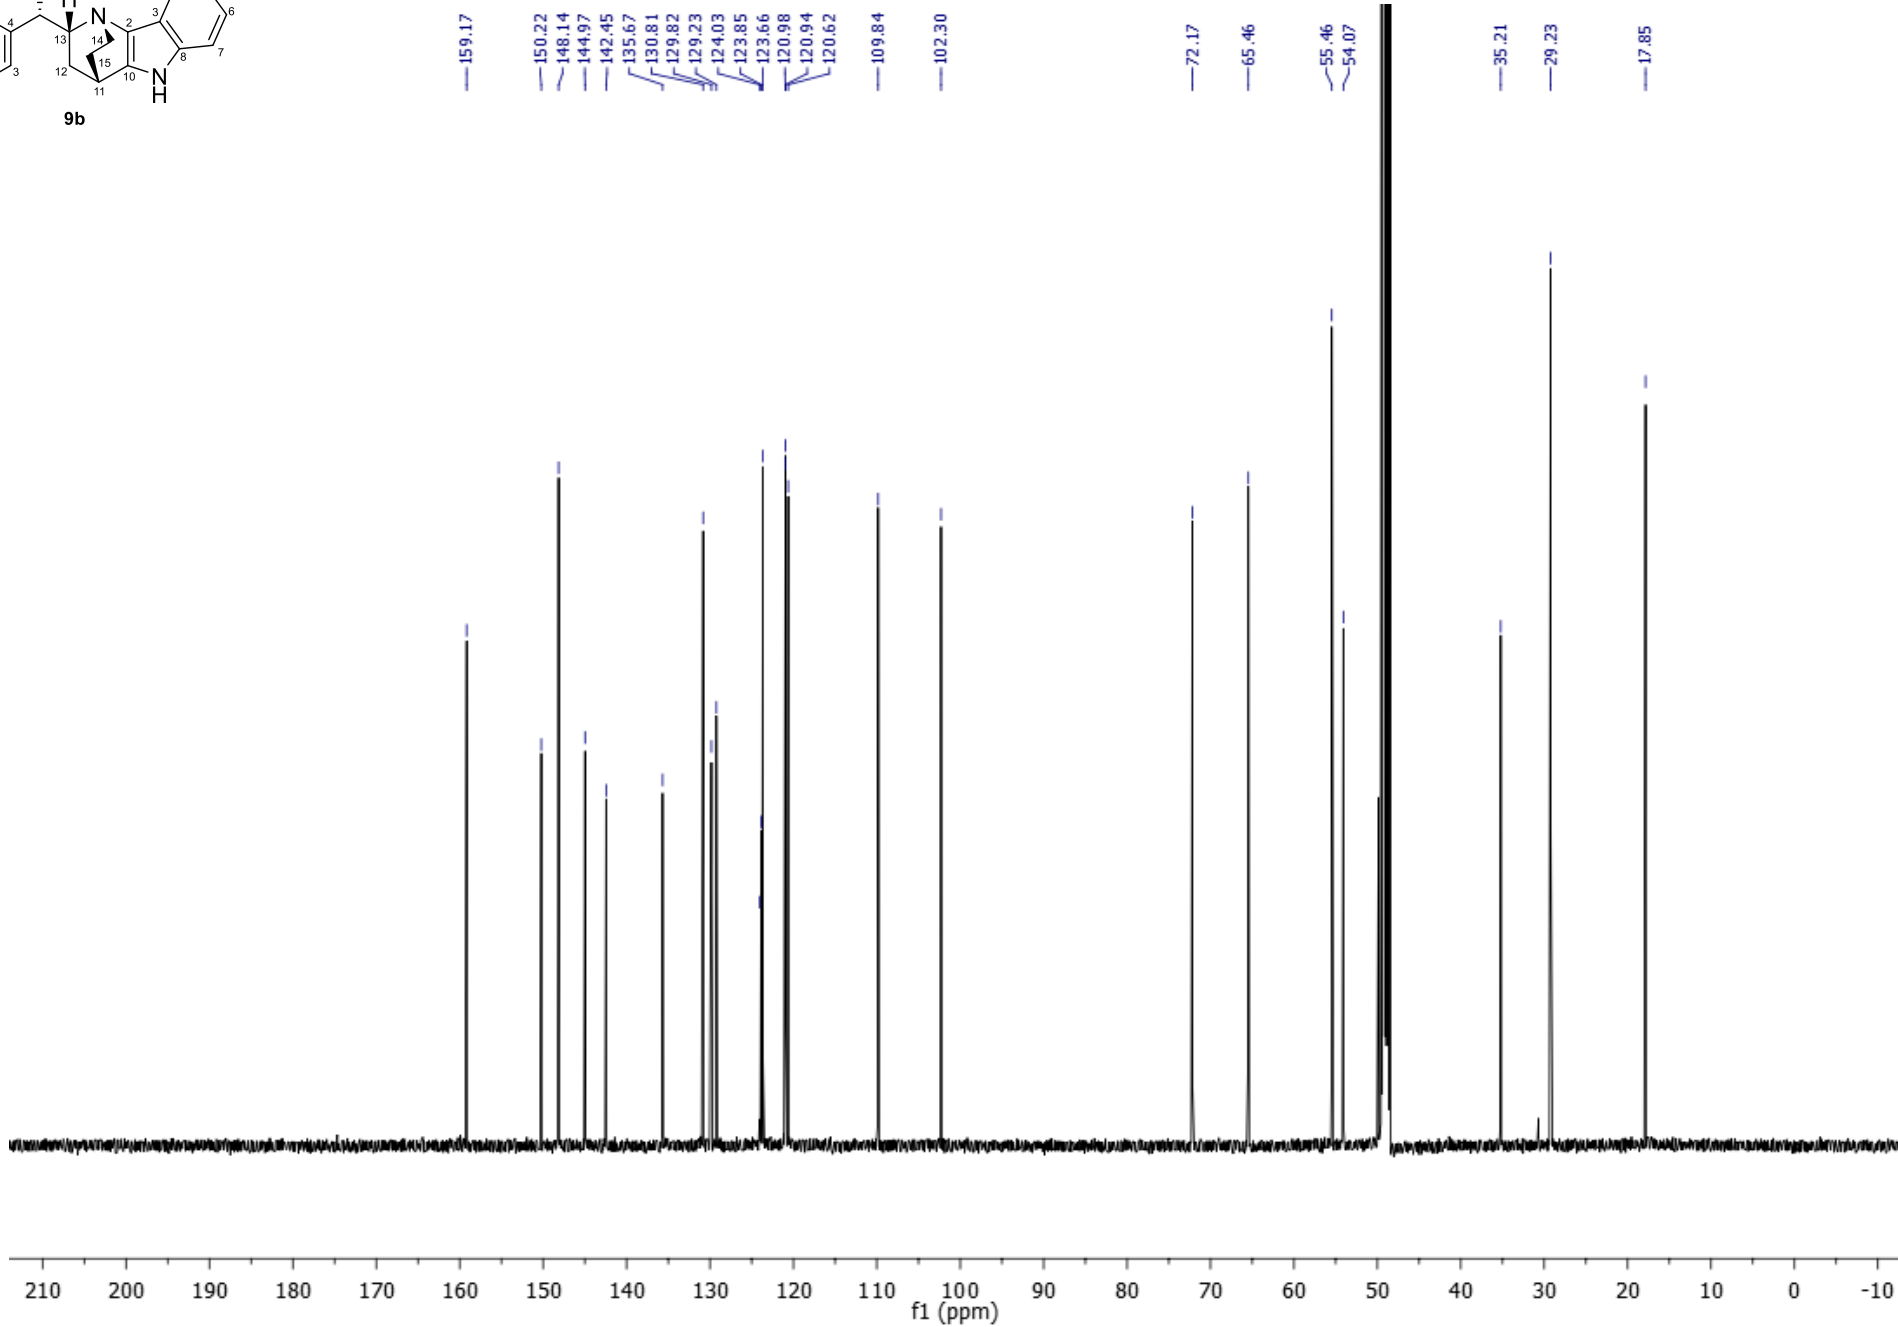



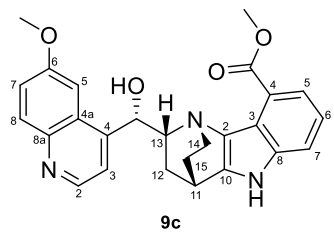

160

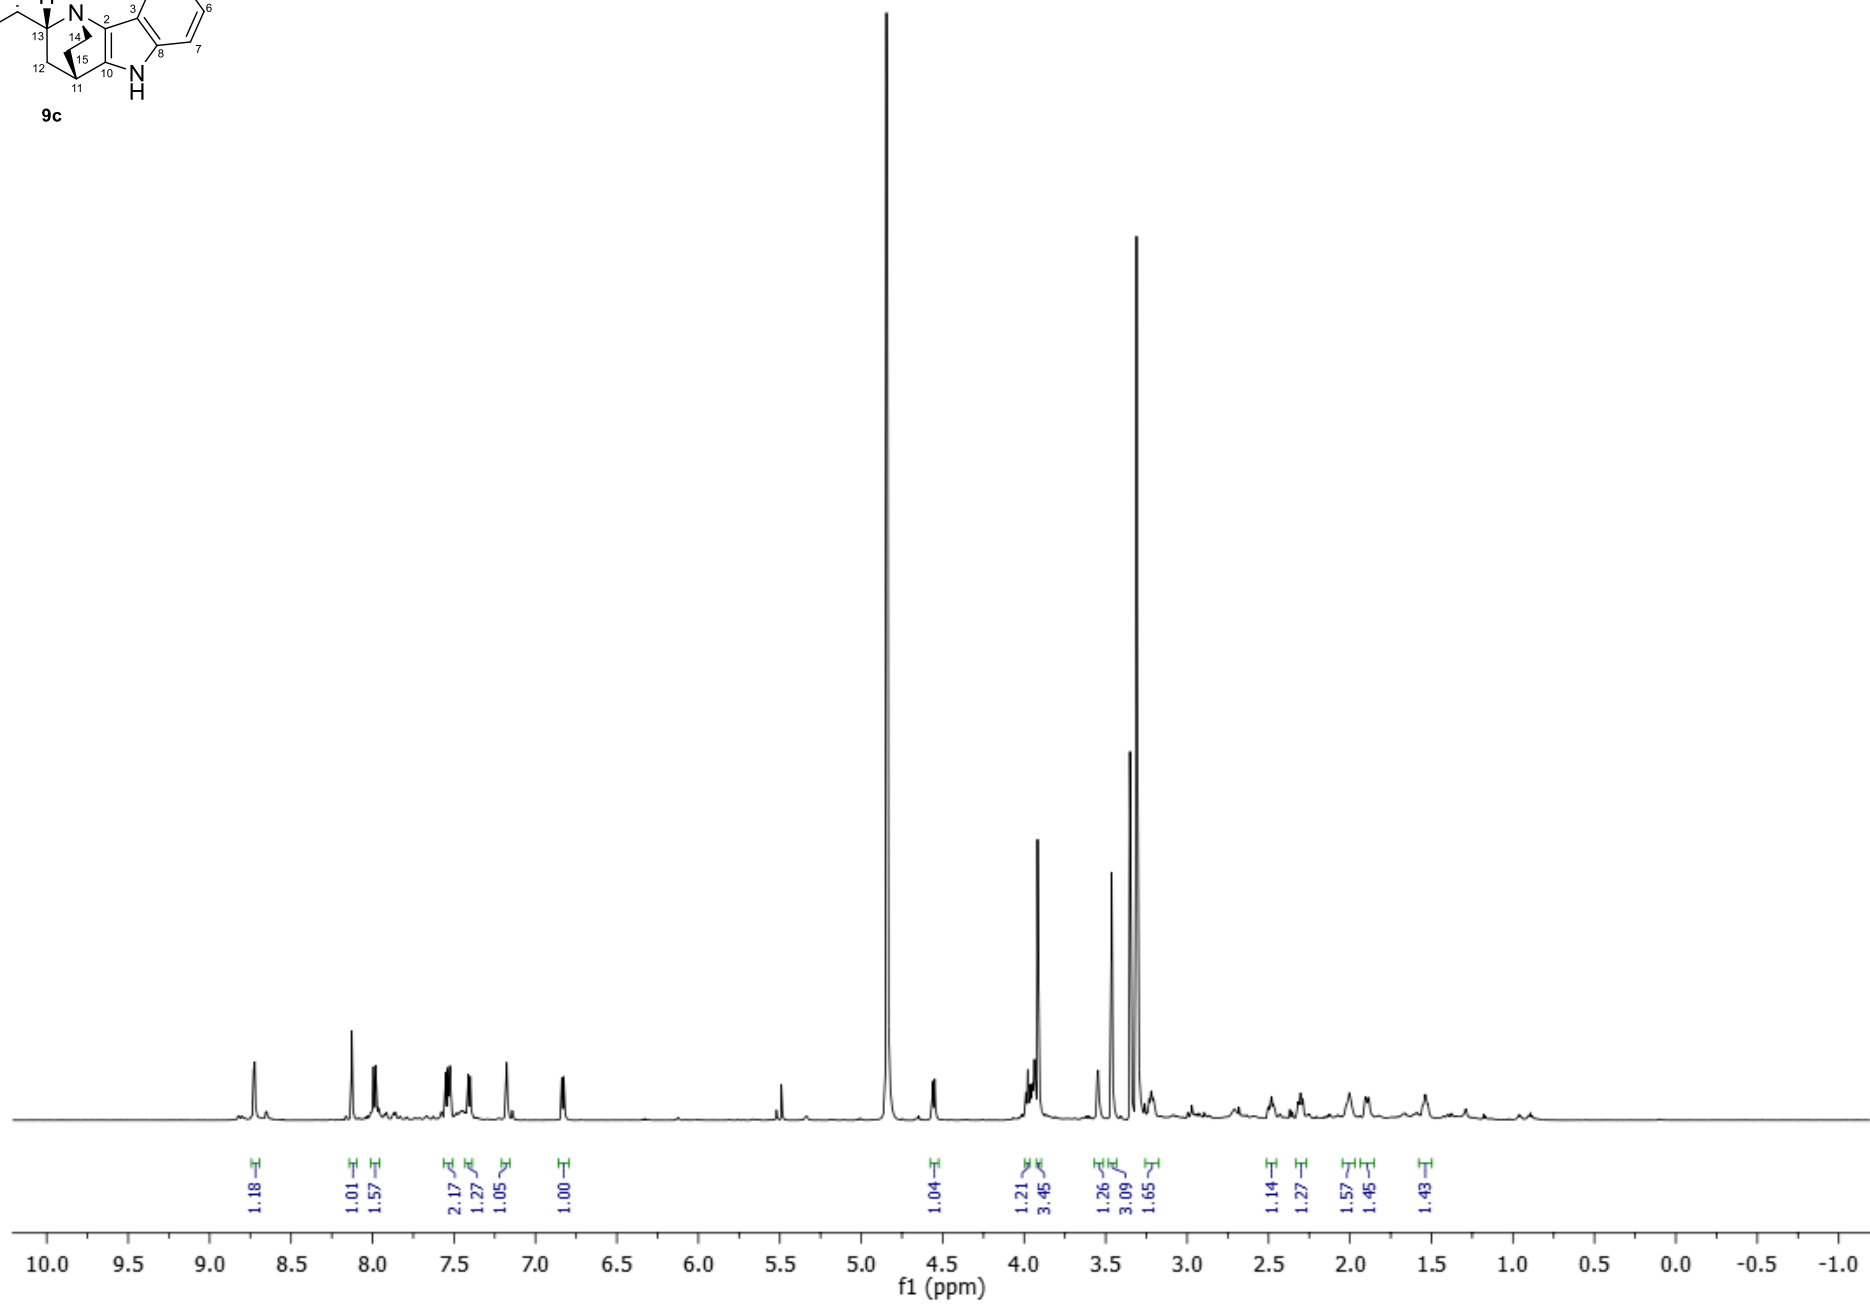



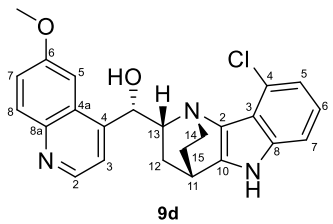

162

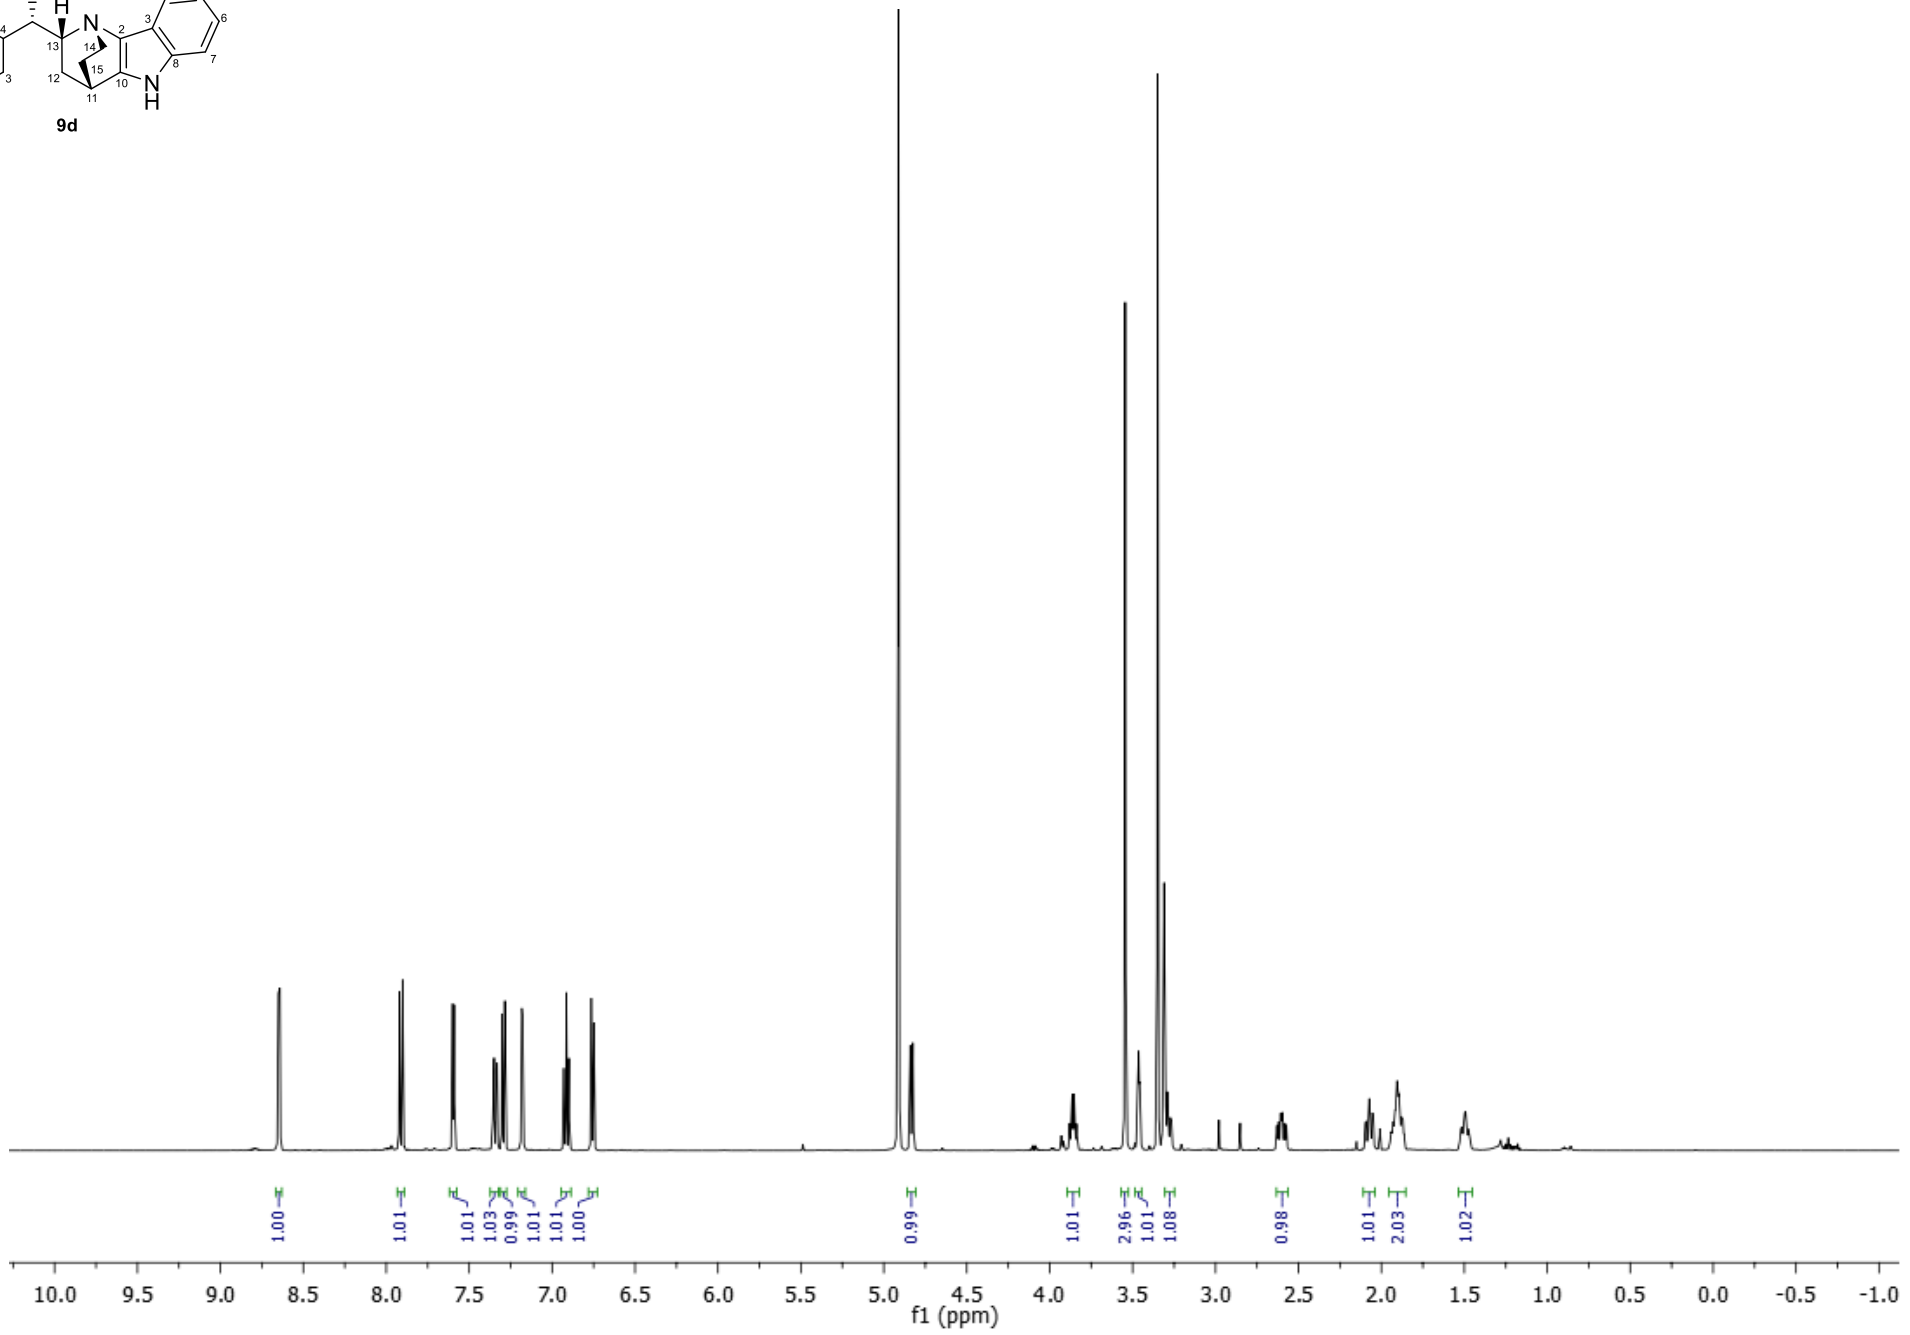

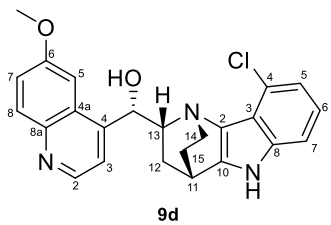

163

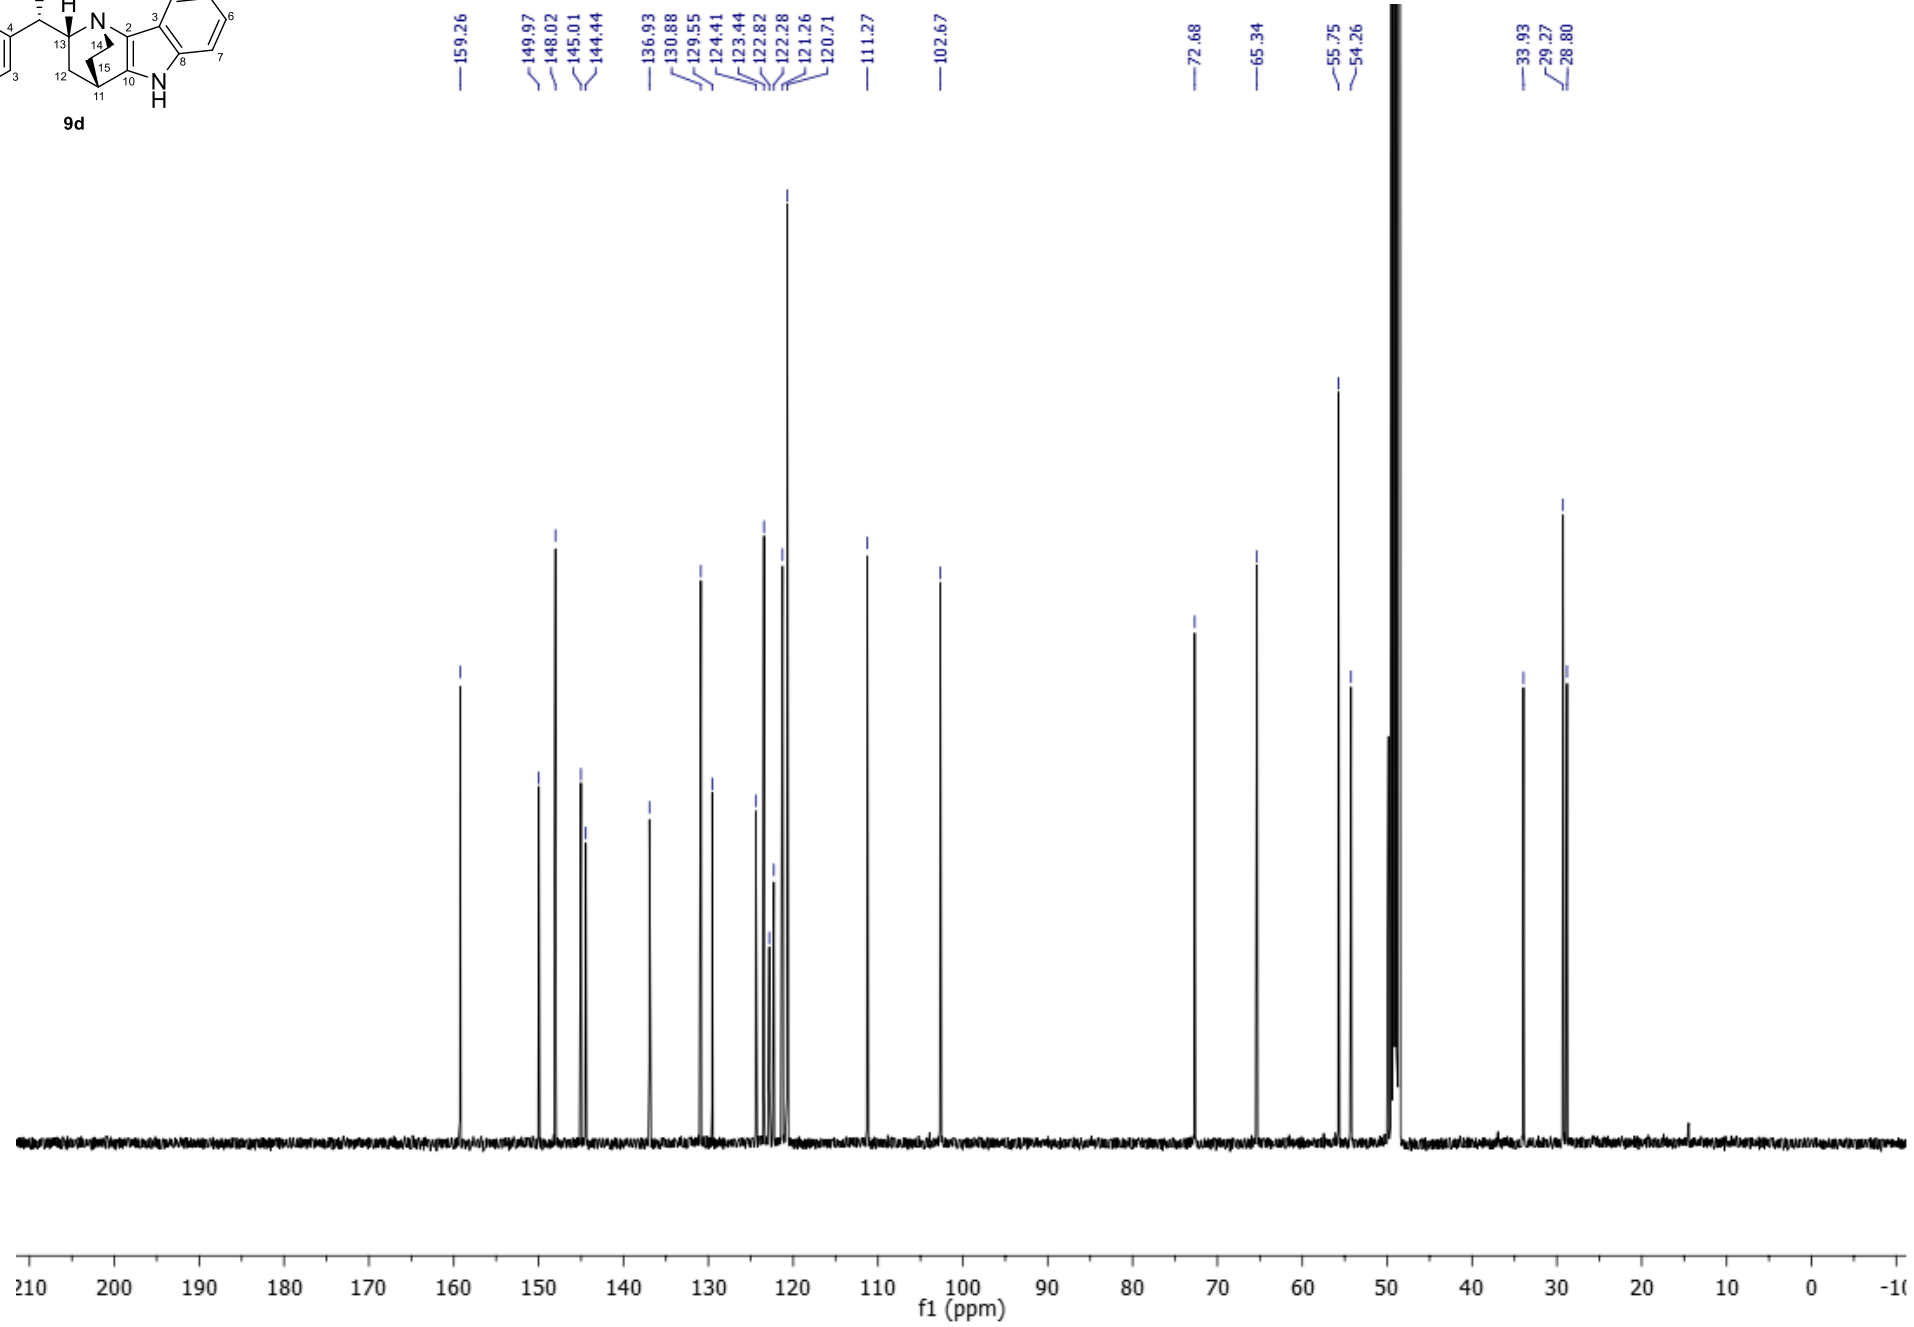

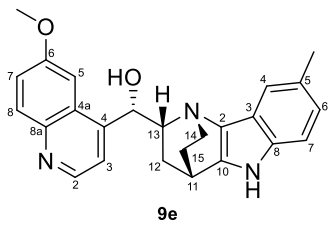

164

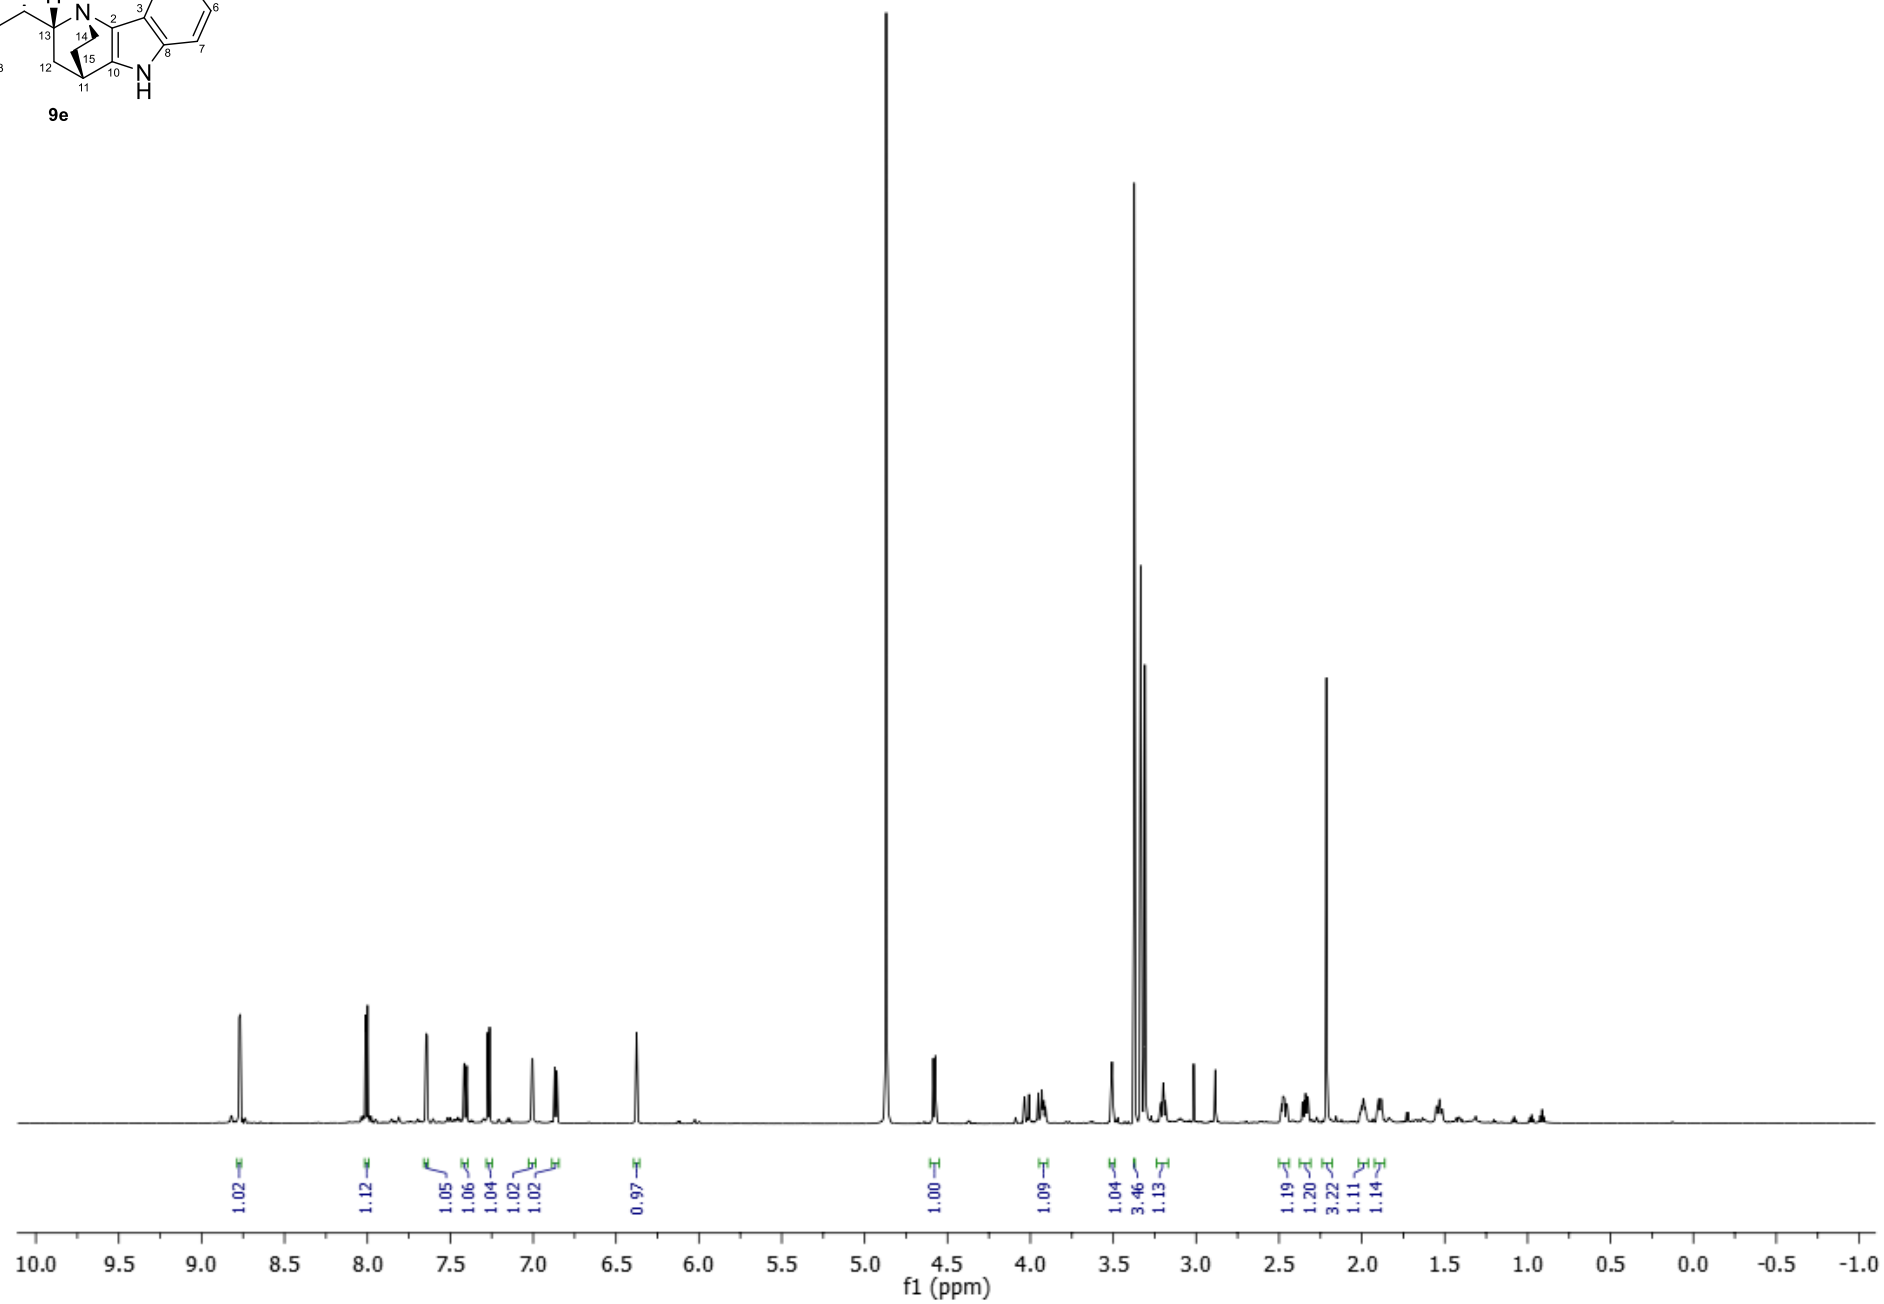

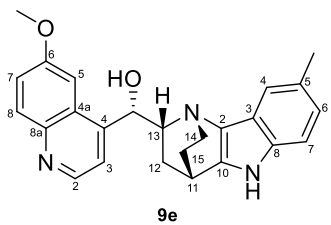

165

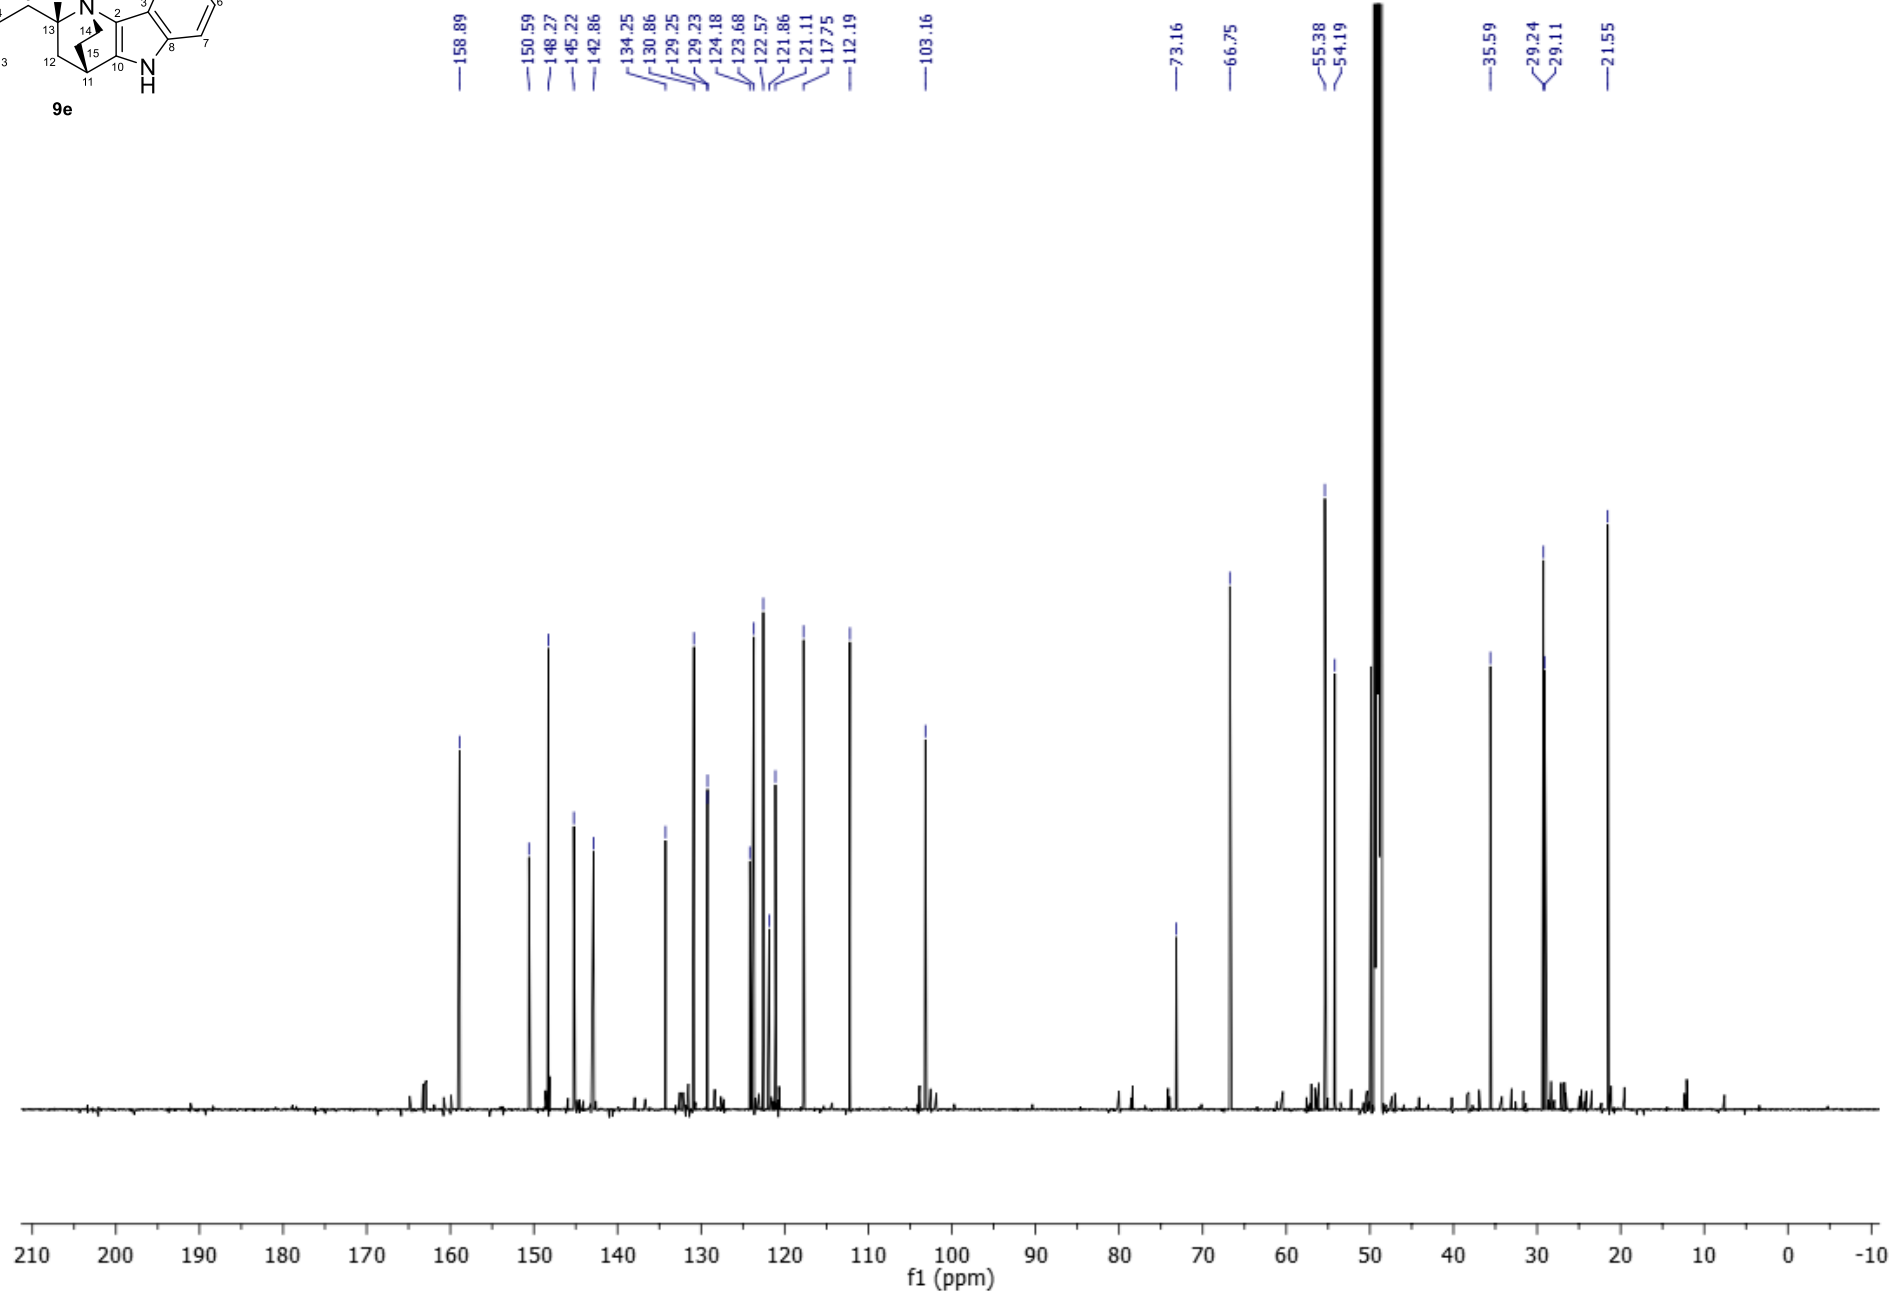

166

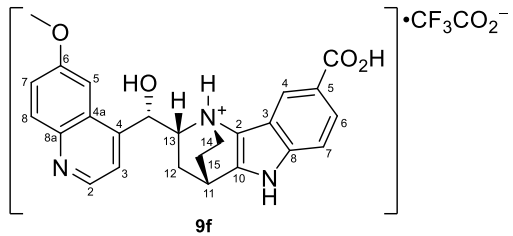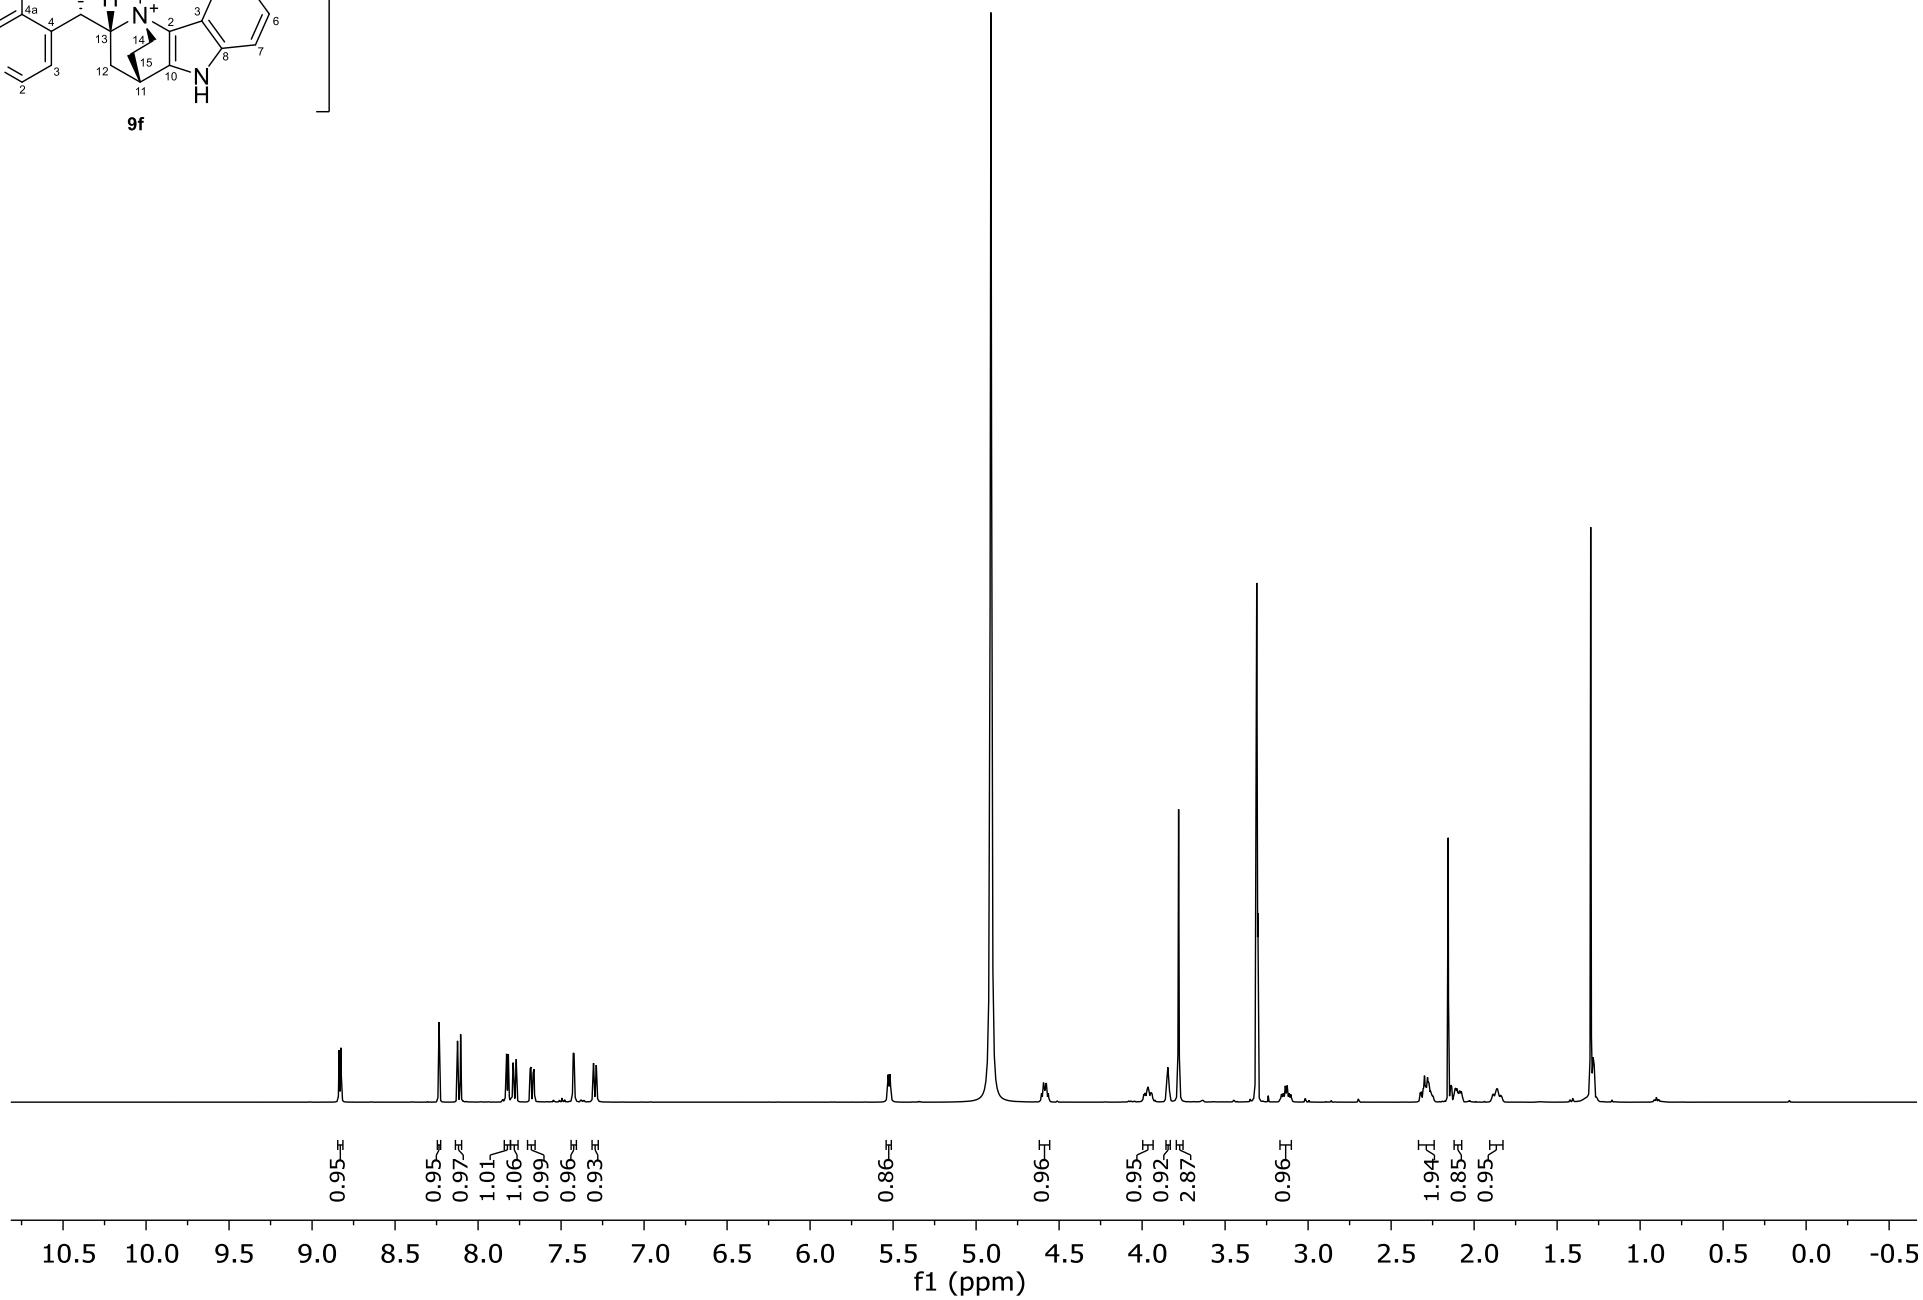





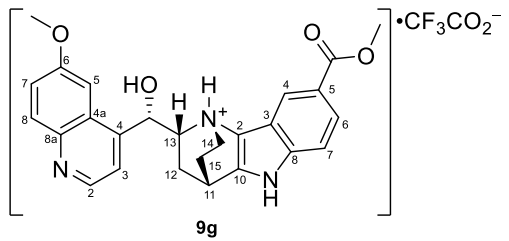

168

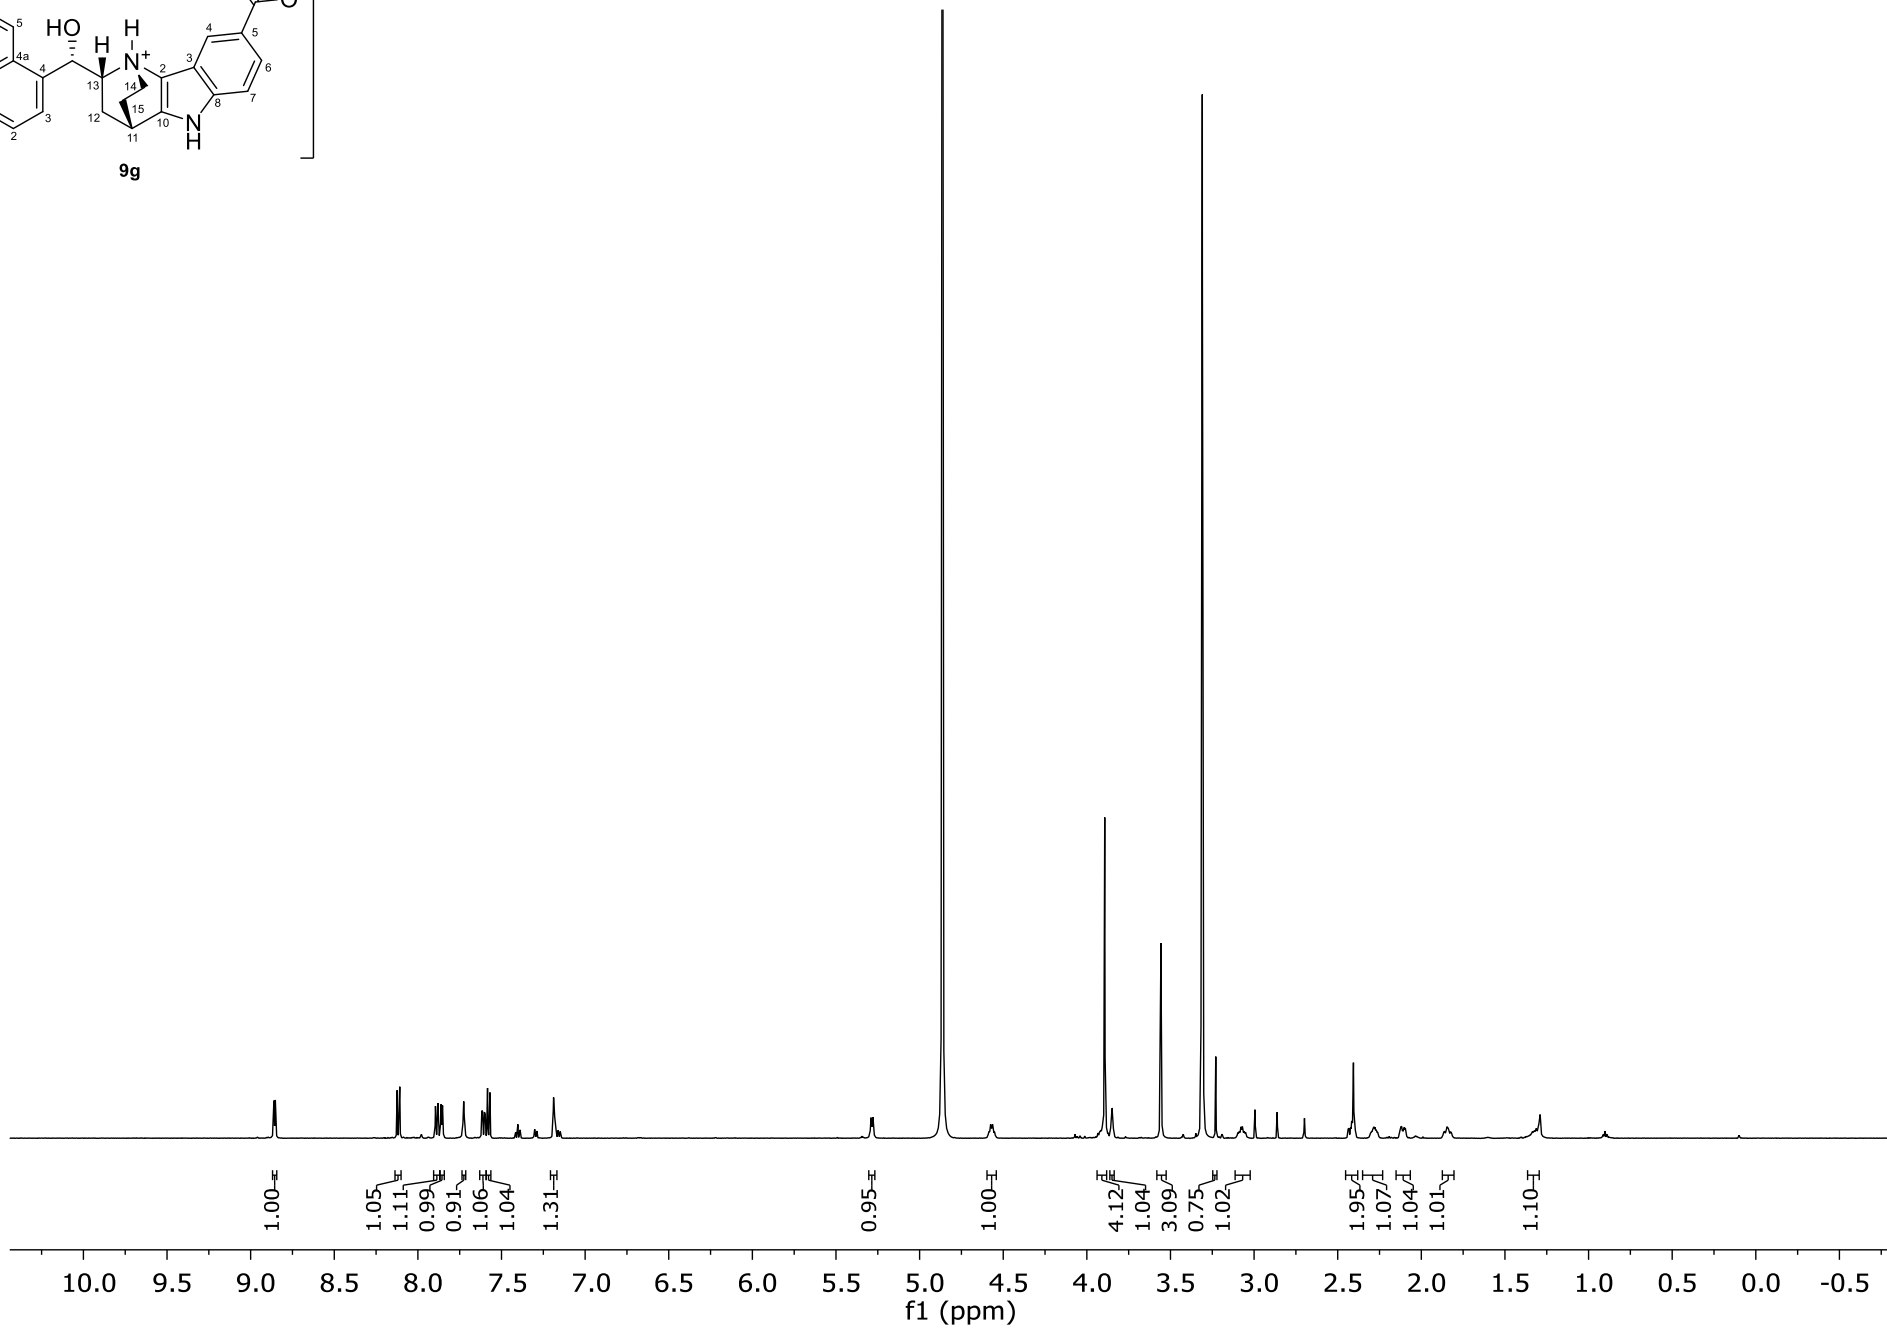

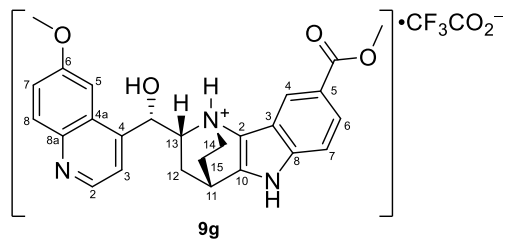

169.10  
163.29  
163.06  
162.83  
162.58  
160.69  
145.57  
142.06  
141.94  
138.25  
128.95  
128.16  
126.49  
124.16  
123.99  
123.81  
121.80  
120.15  
119.92  
113.33  
— 102.90

~70.04  
~68.37

~56.89  
~56.18  
~52.44

— 45.55

~31.33  
~28.66  
~25.74

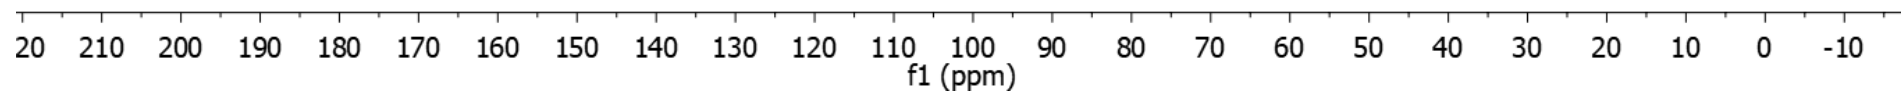

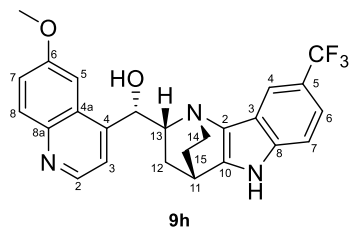

170

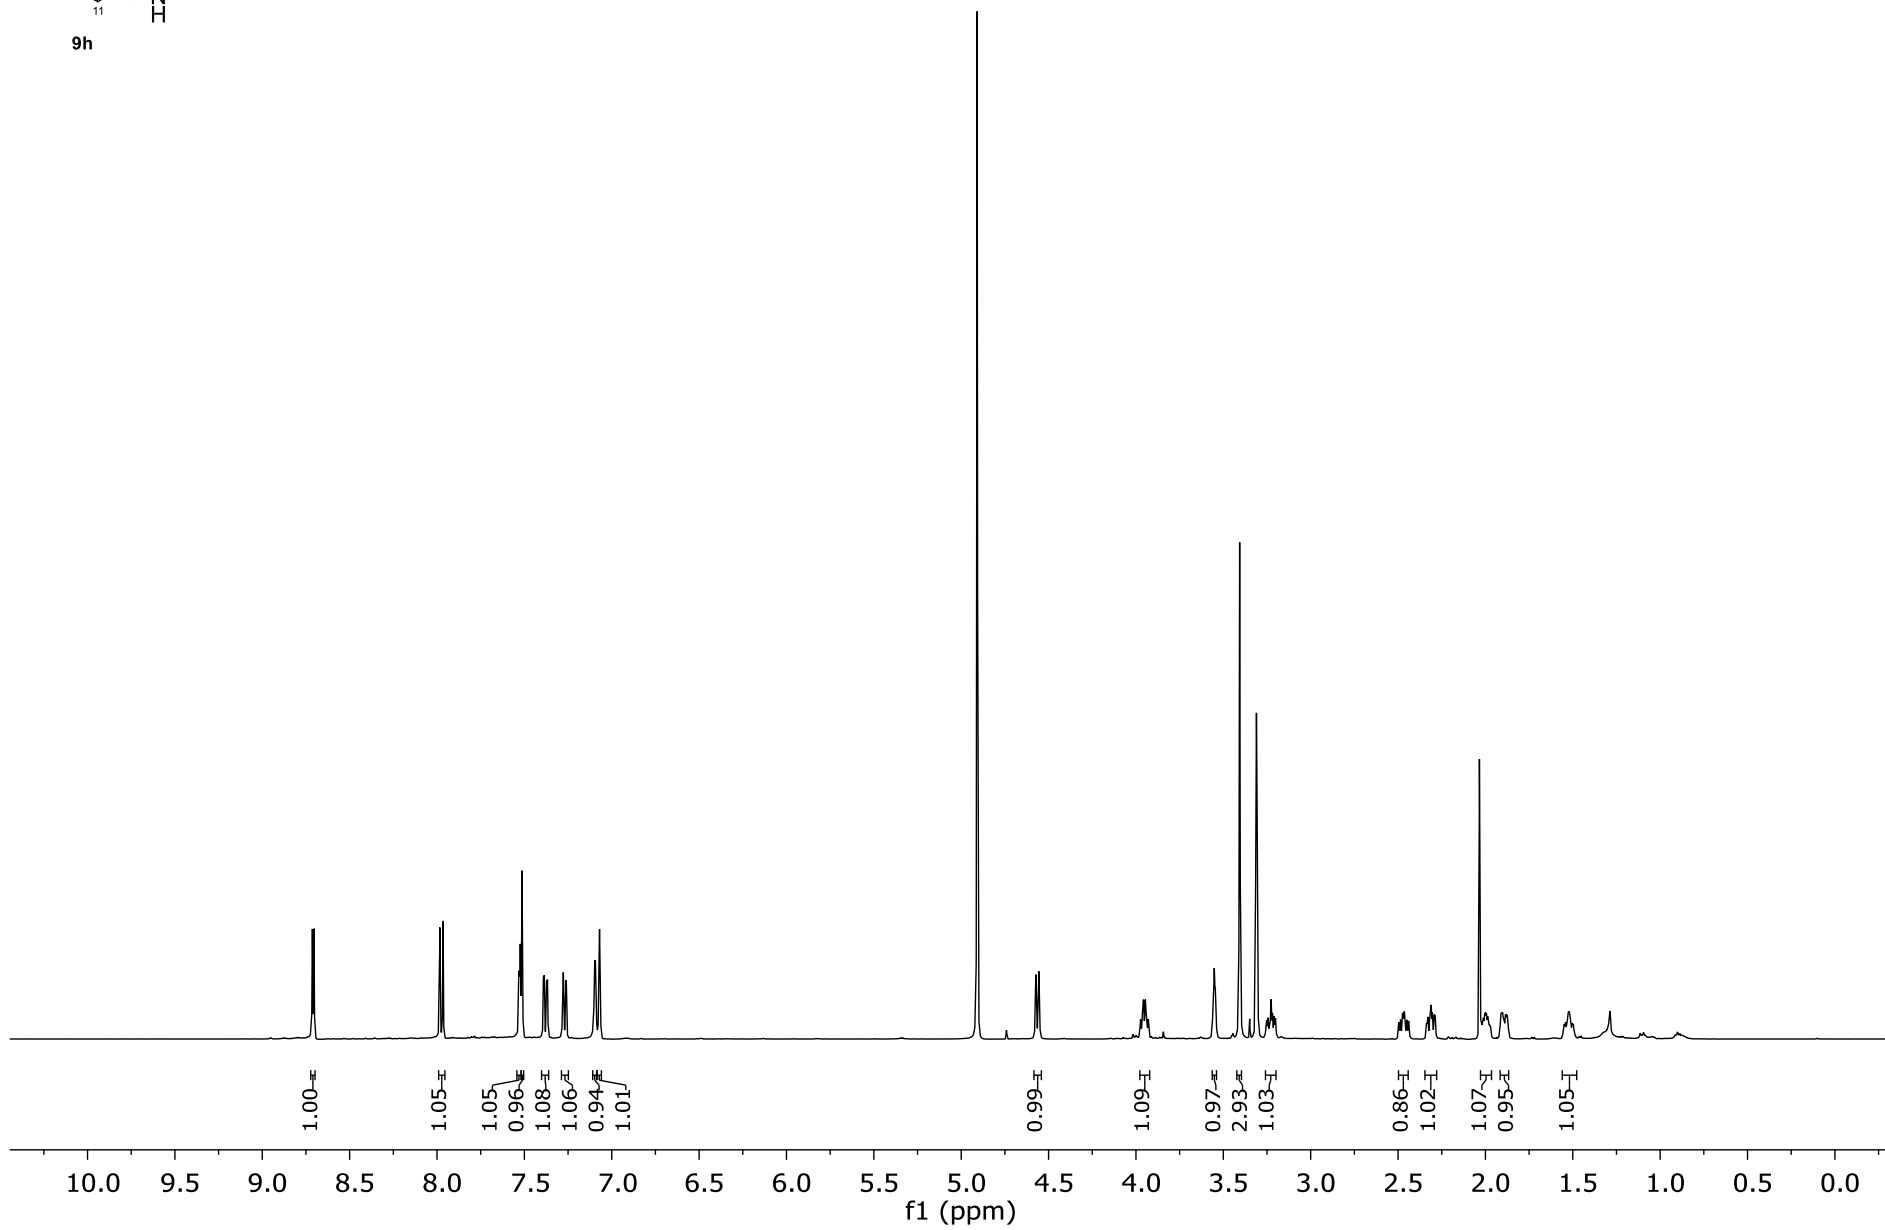

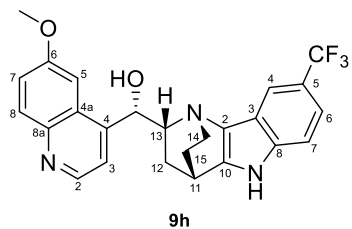

171

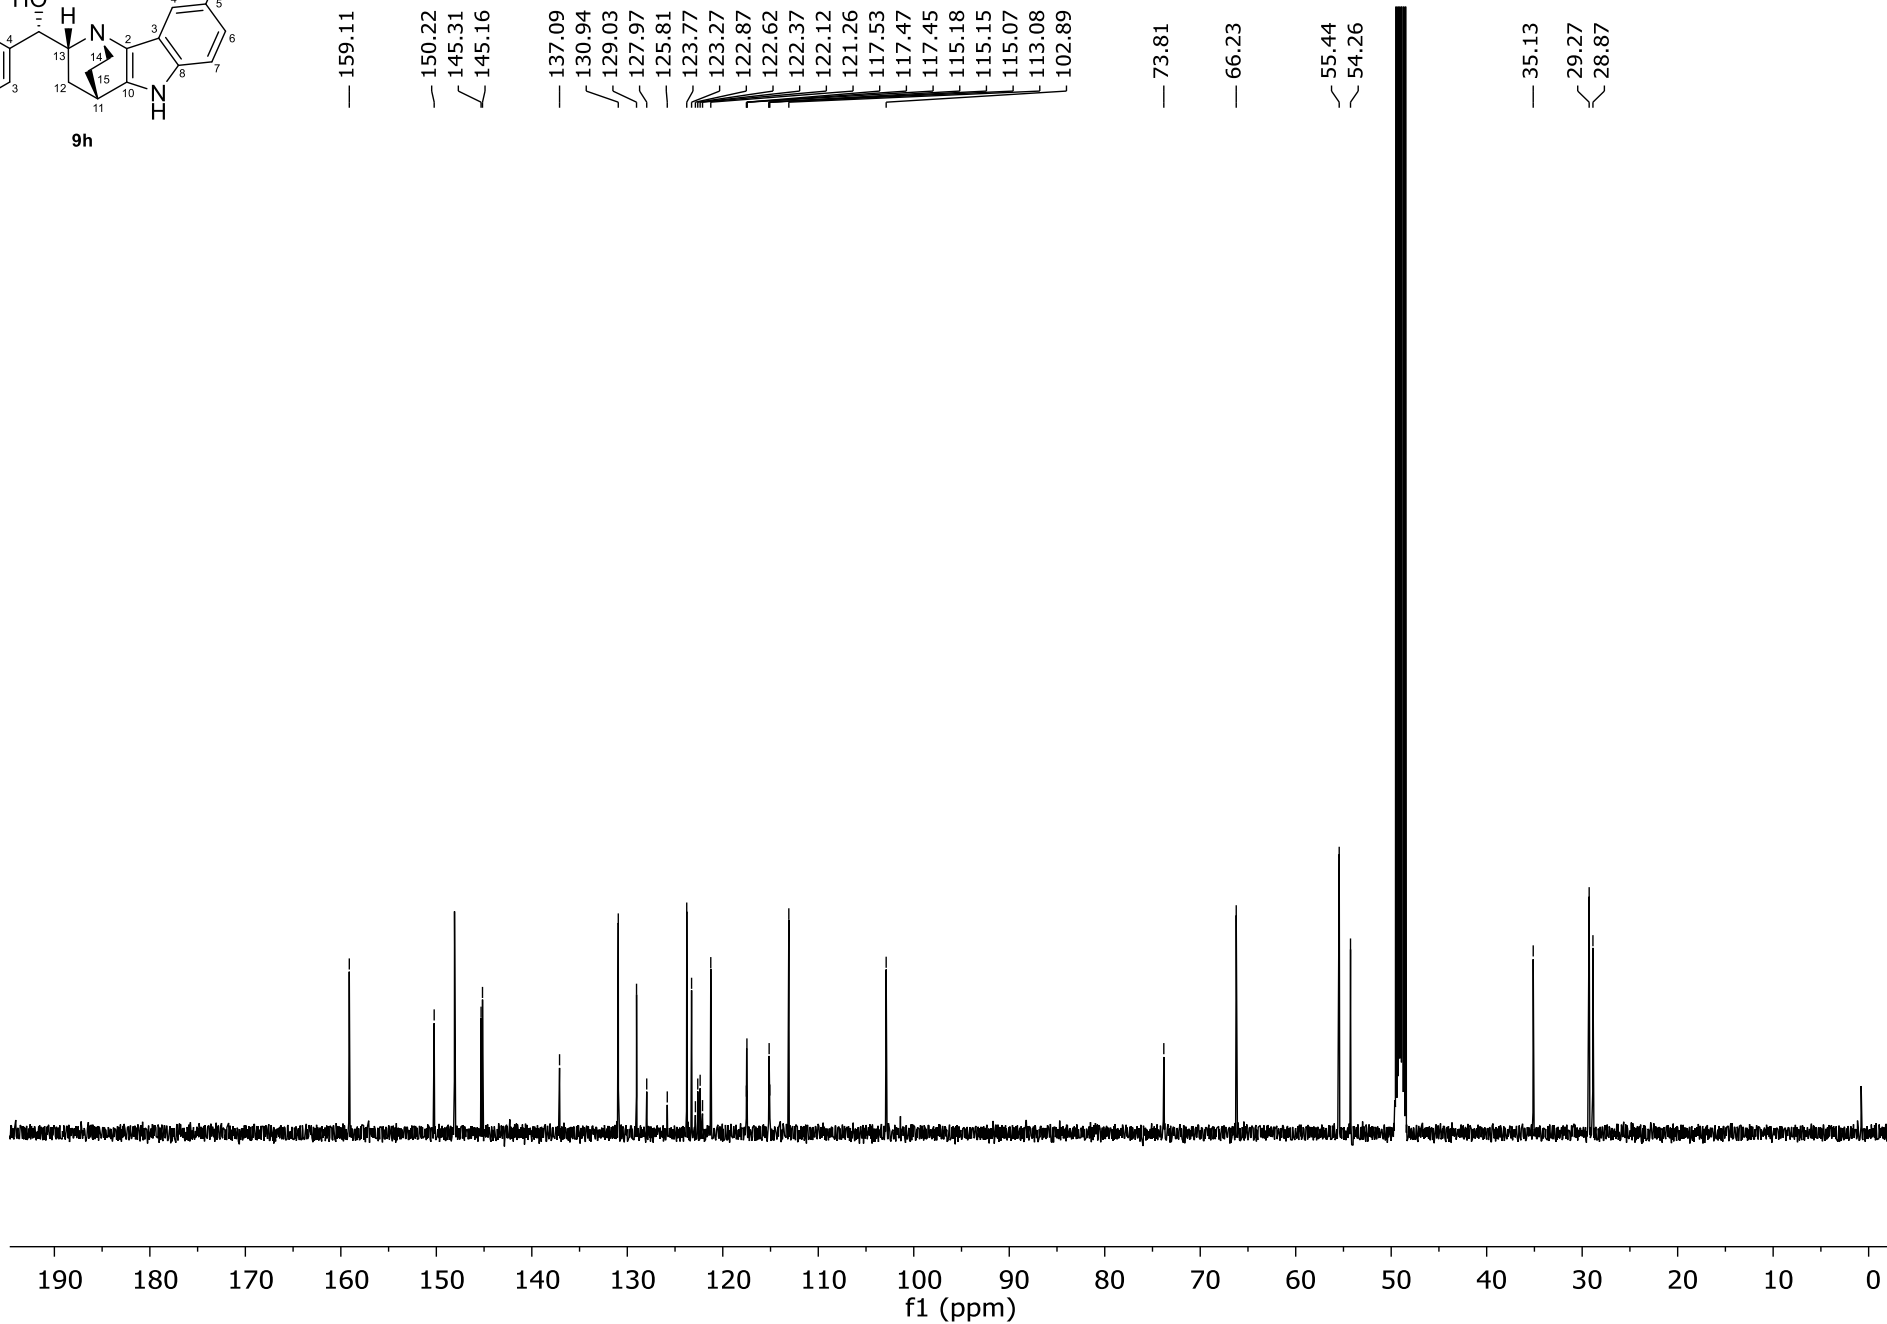

172

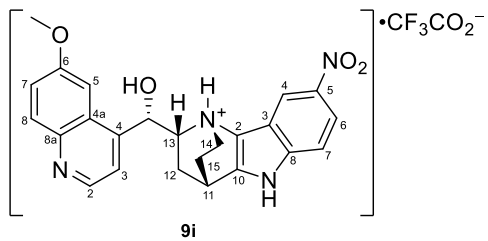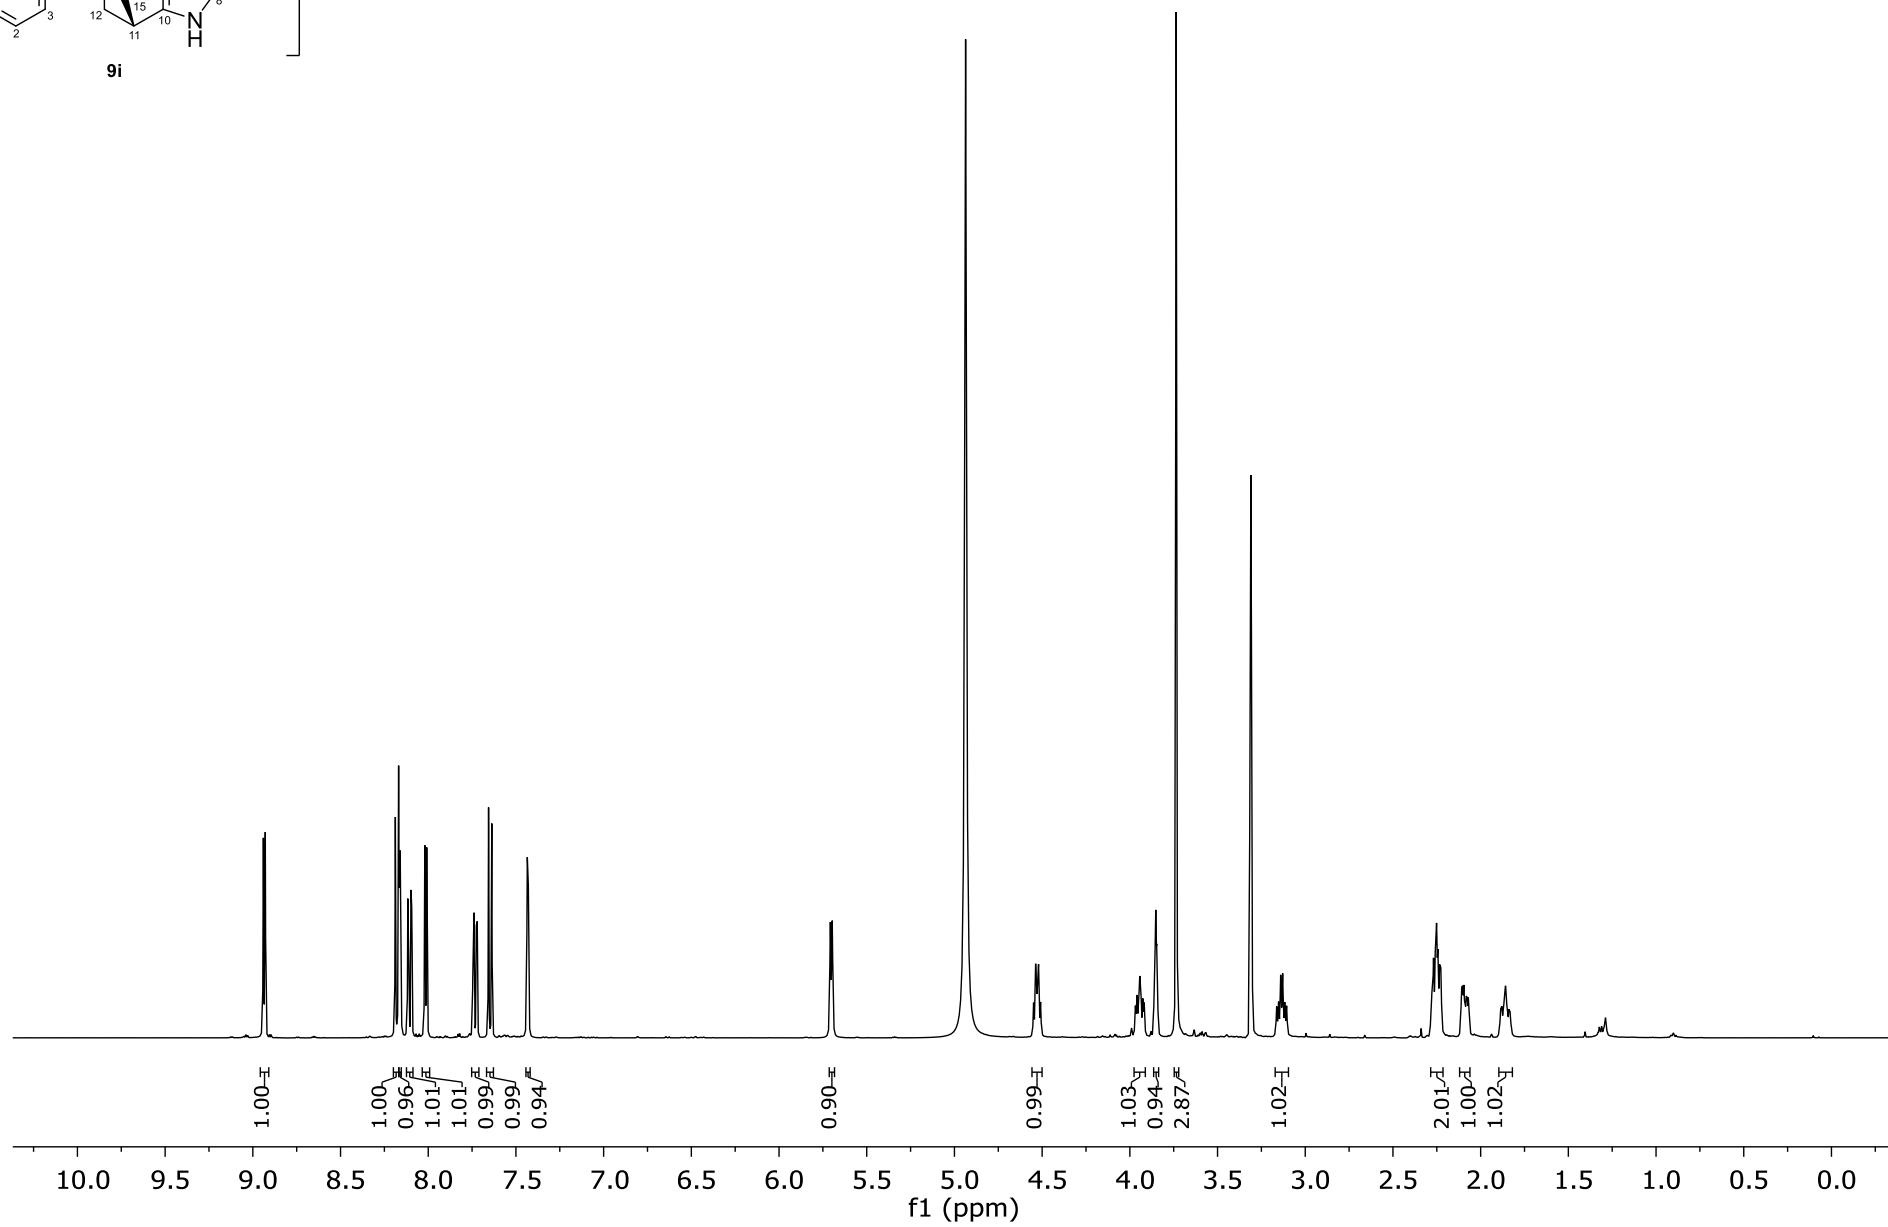

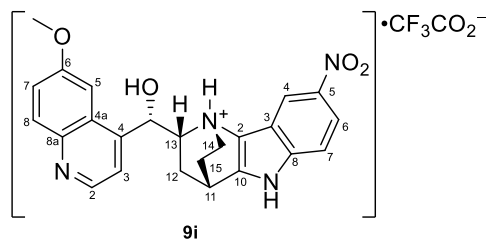

163.11  
162.82  
162.53  
162.24  
161.53  
155.81

144.03  
143.52  
143.27  
138.59  
137.34  
129.30  
128.26  
125.47  
121.82  
119.95  
117.88  
116.21  
114.68  
113.67  
103.30

69.46  
67.60

56.73  
56.65

30.47  
28.85  
25.43

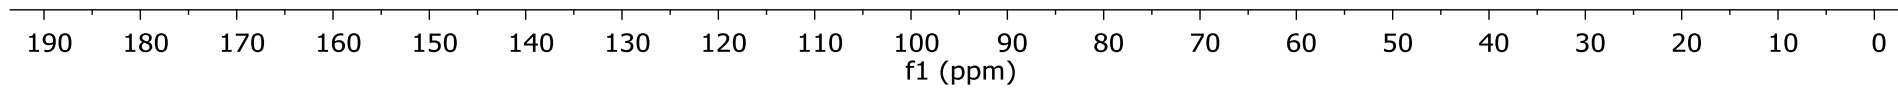

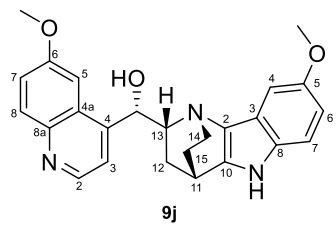

174

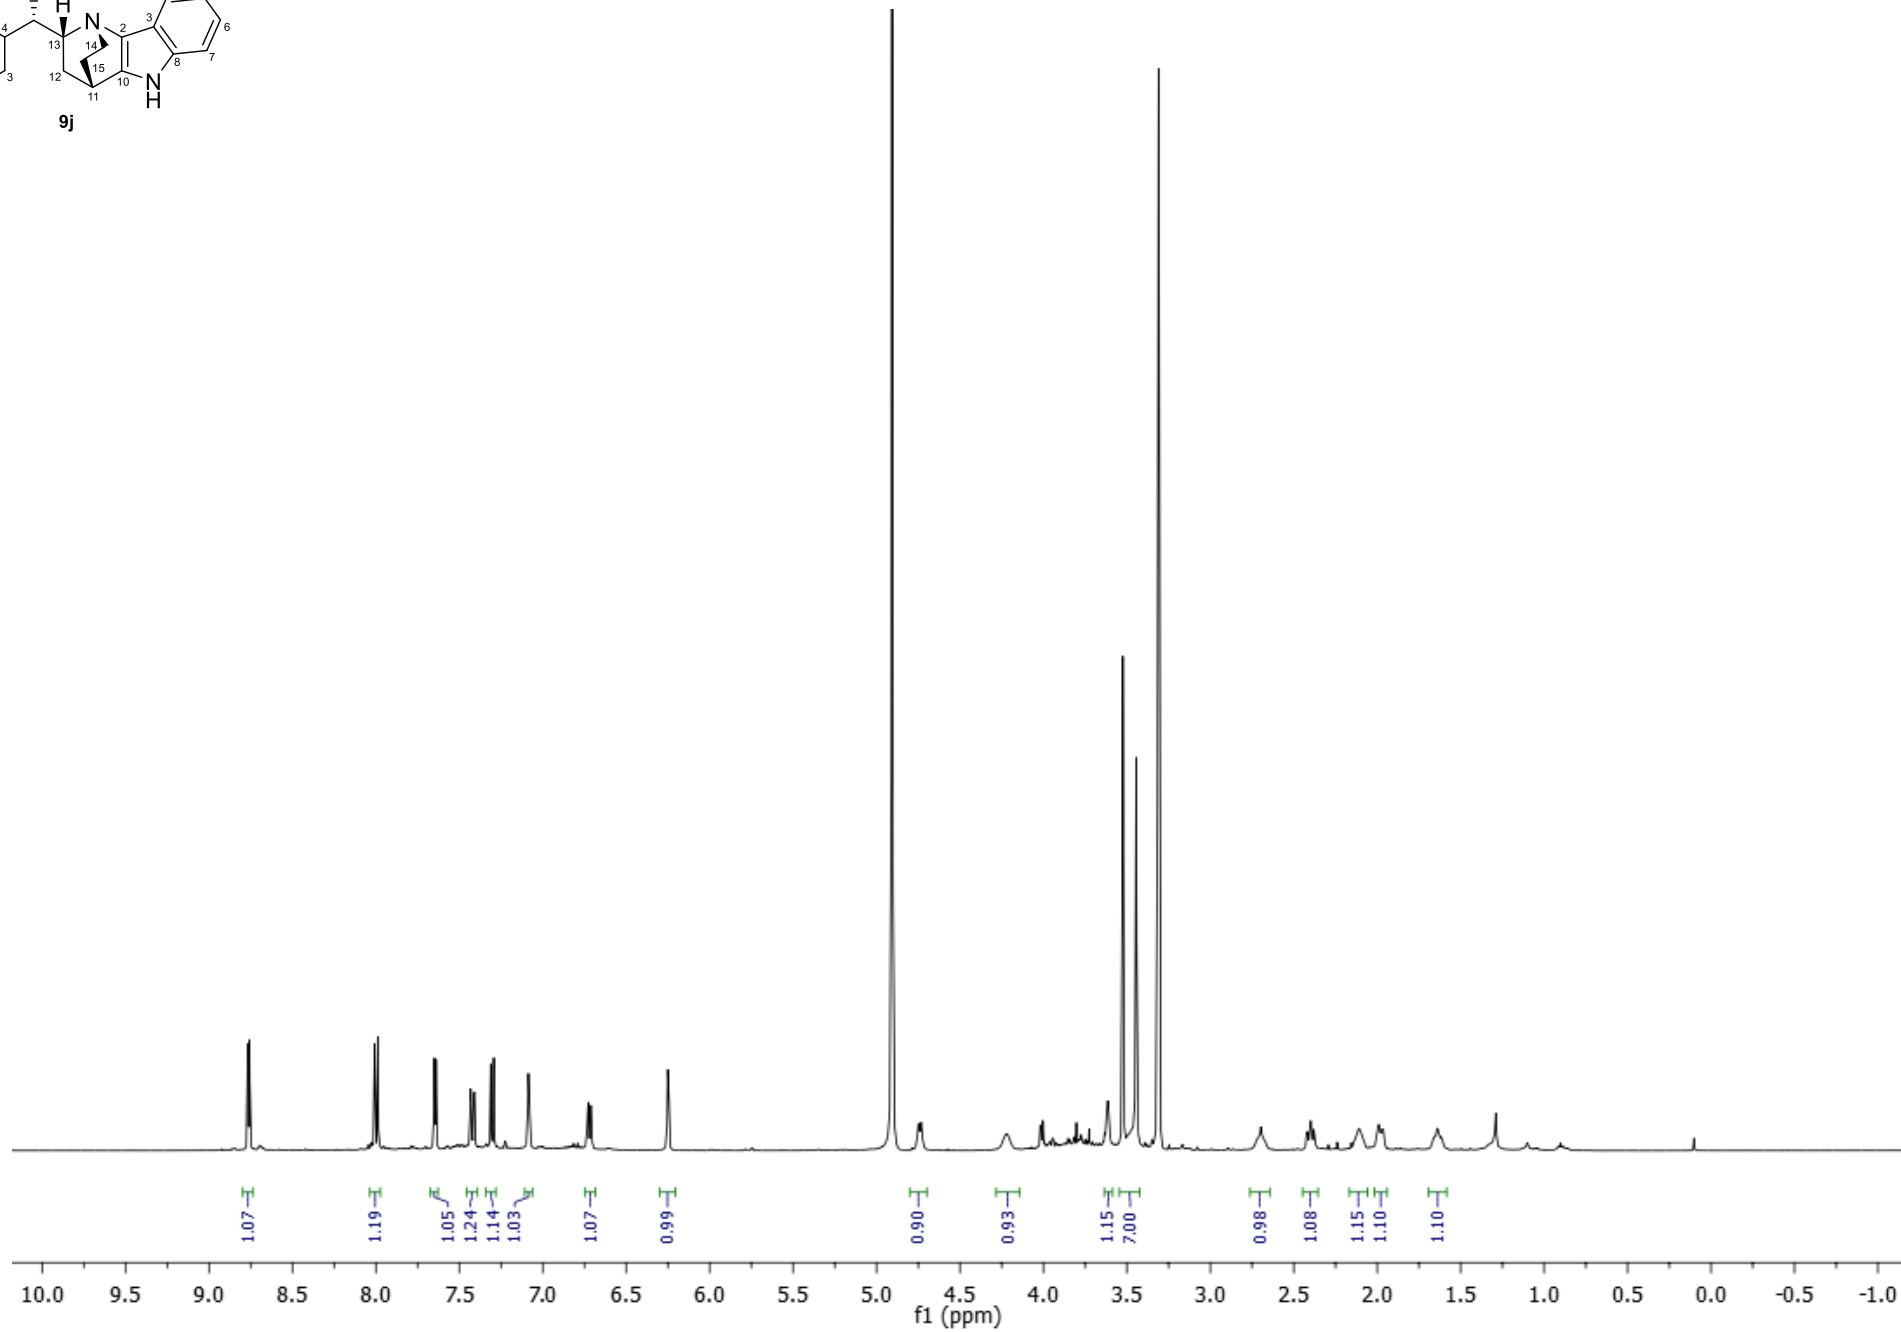

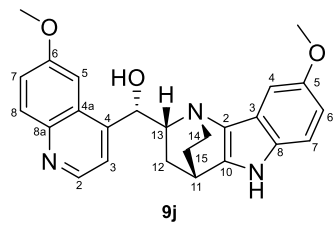

175

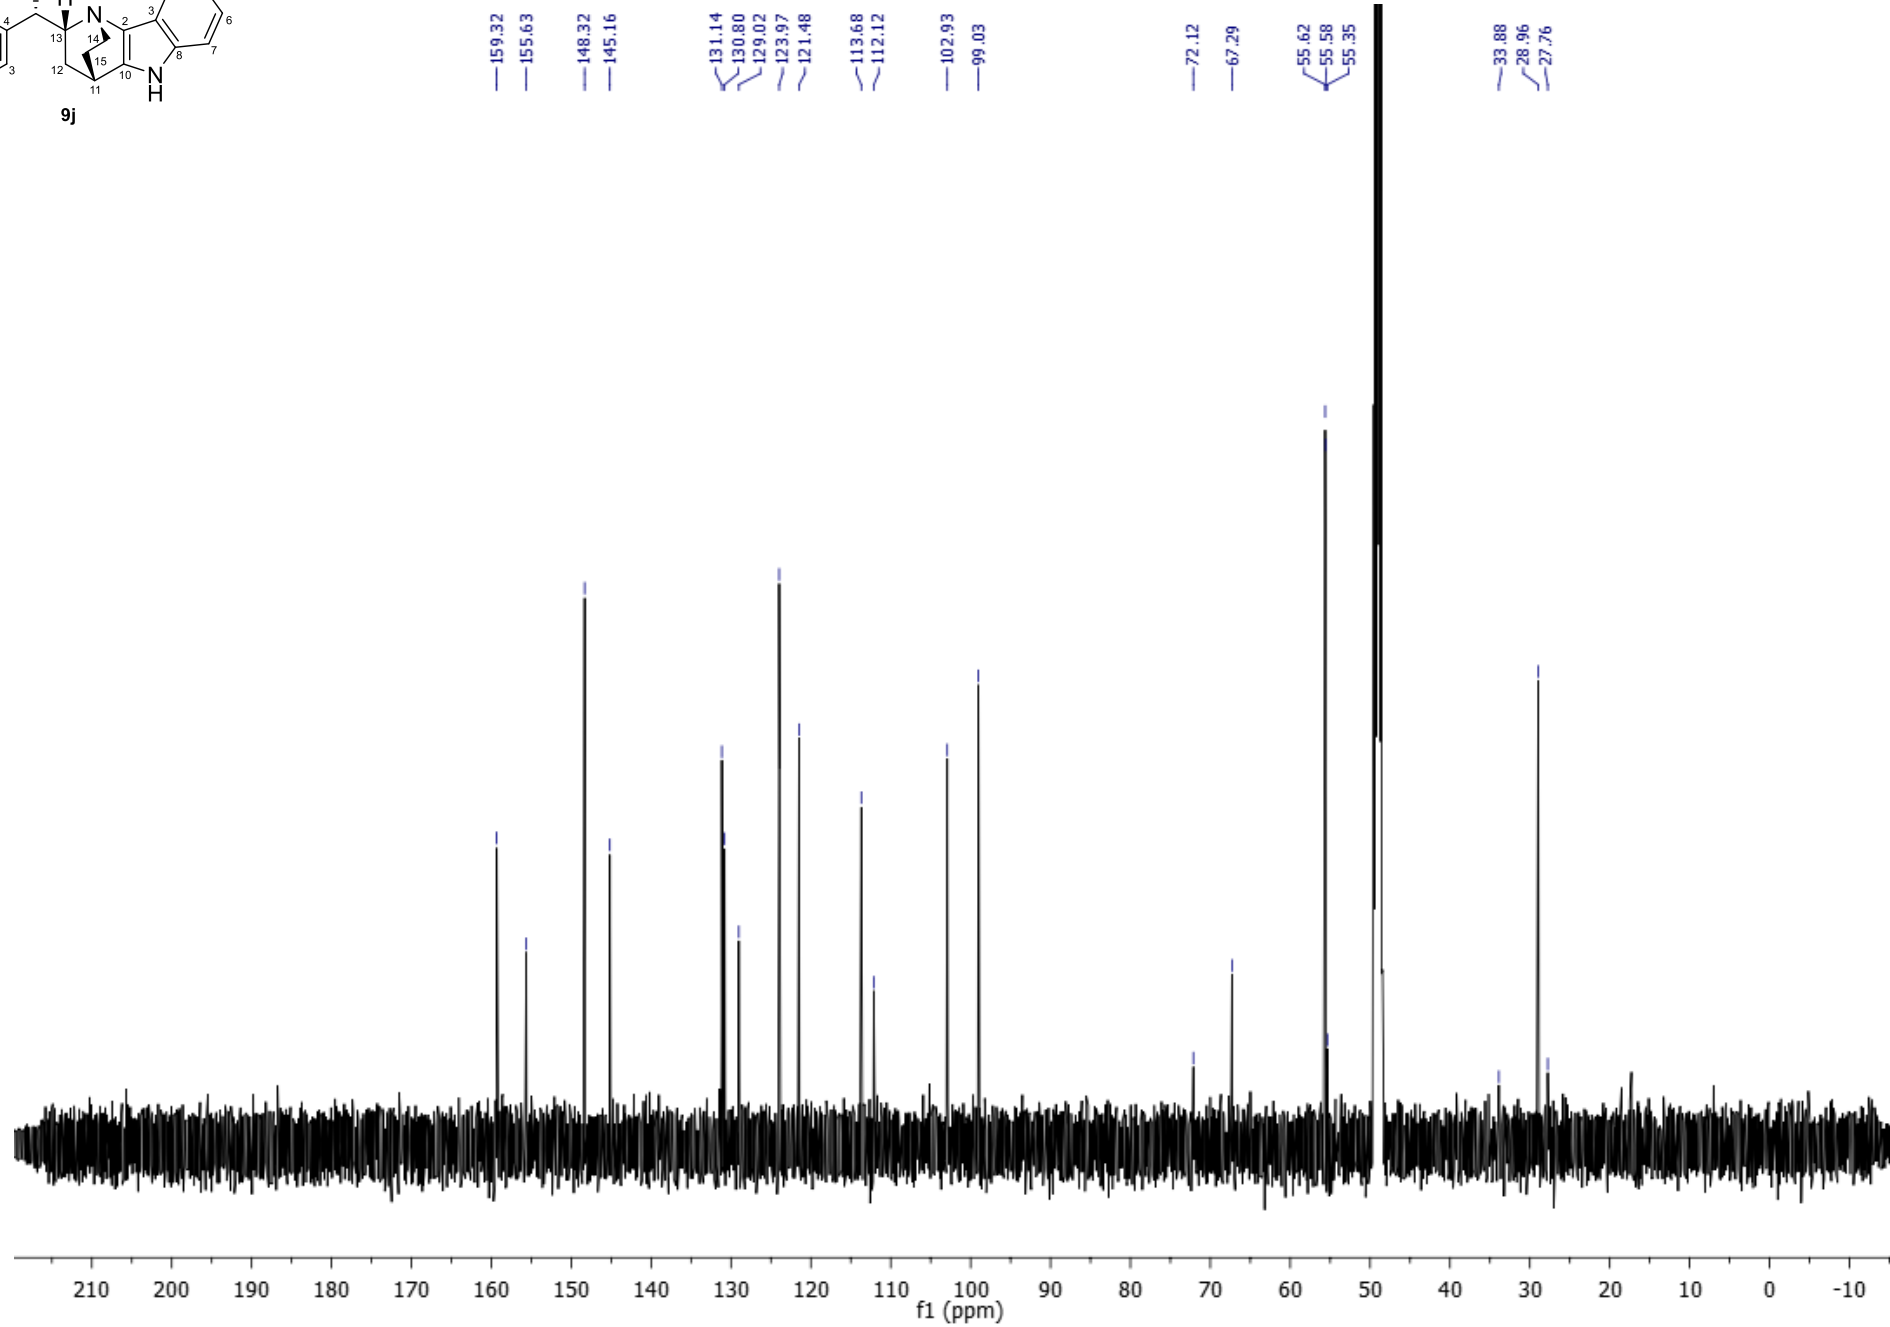



176

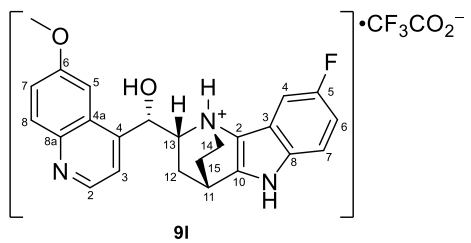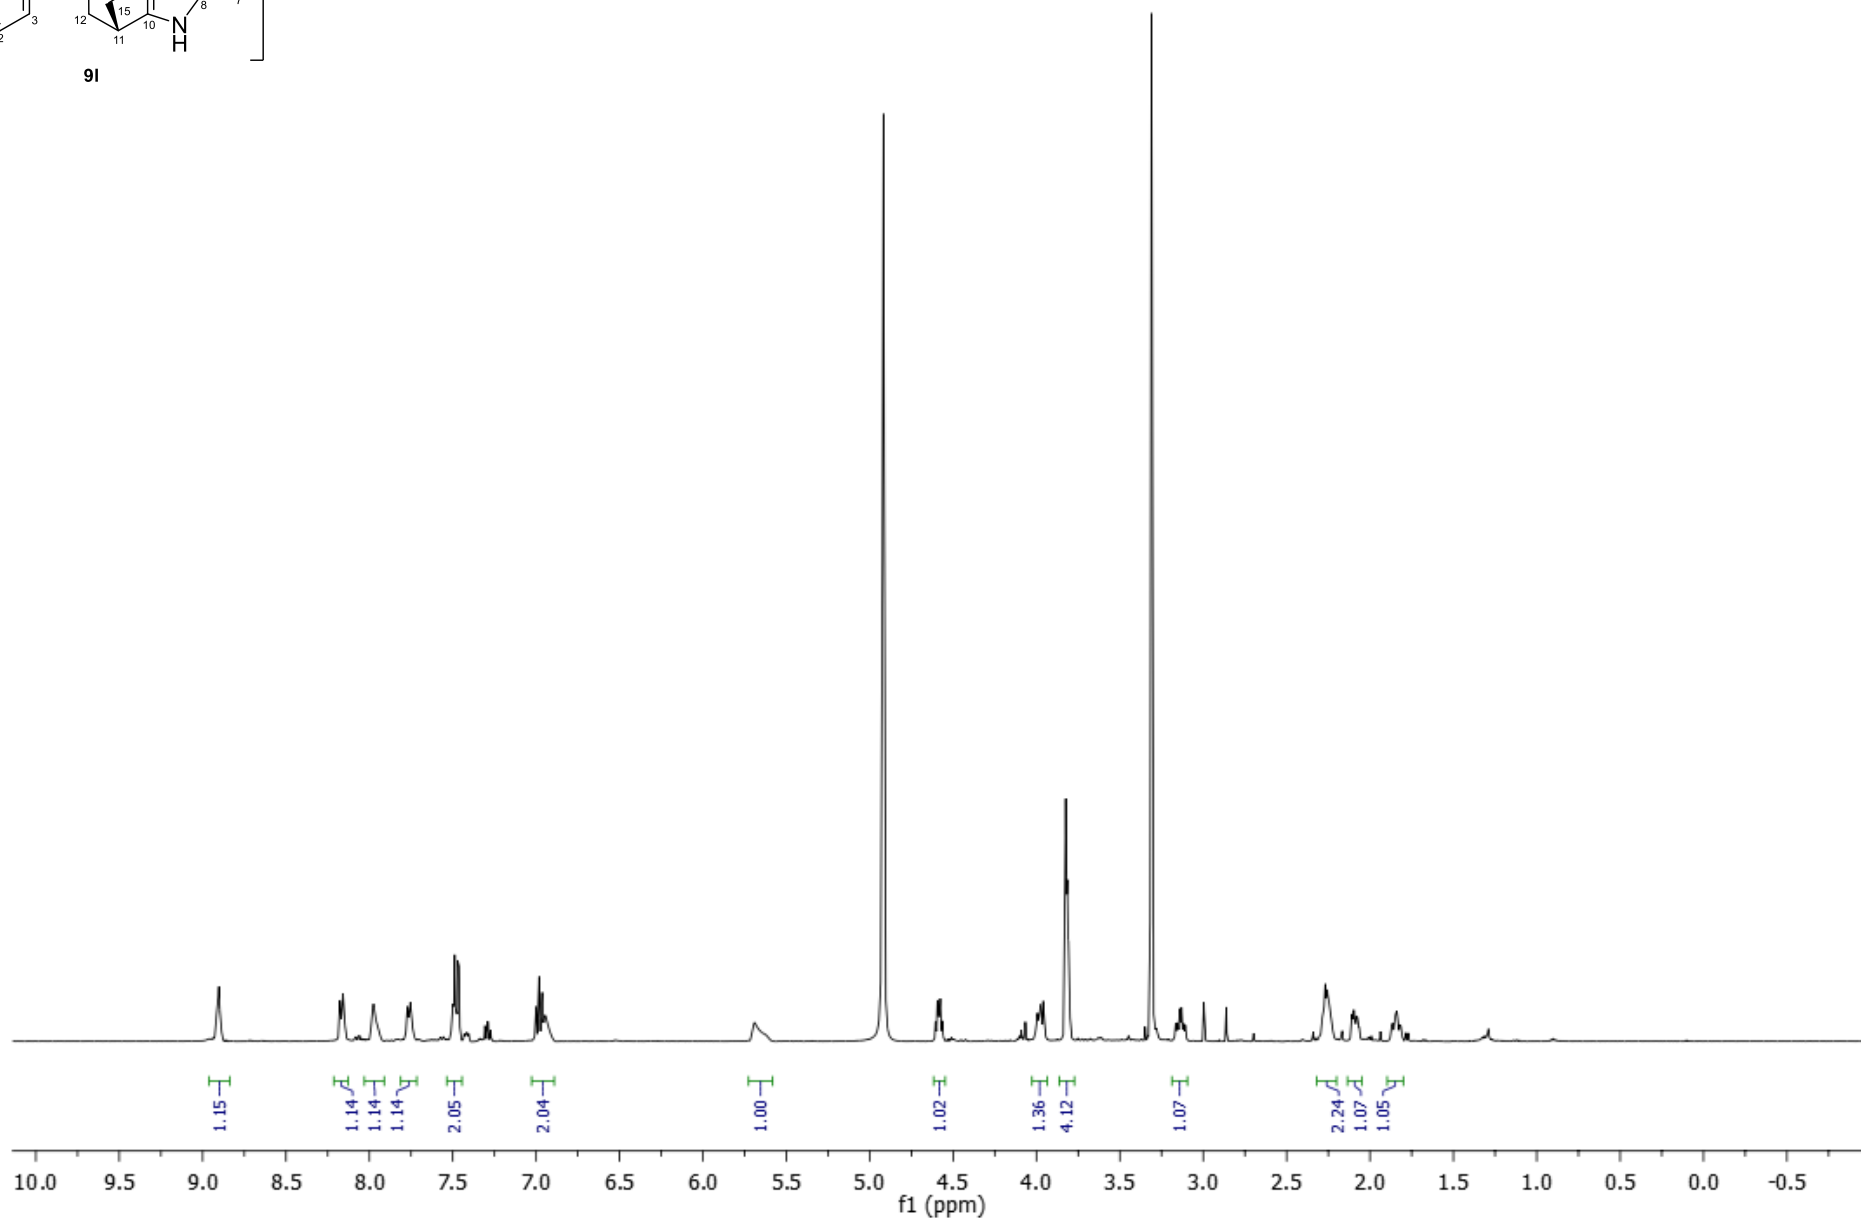

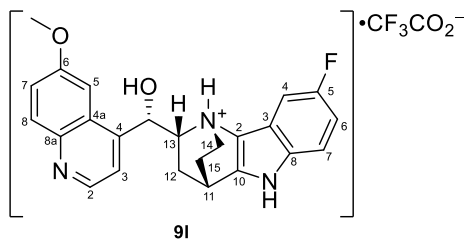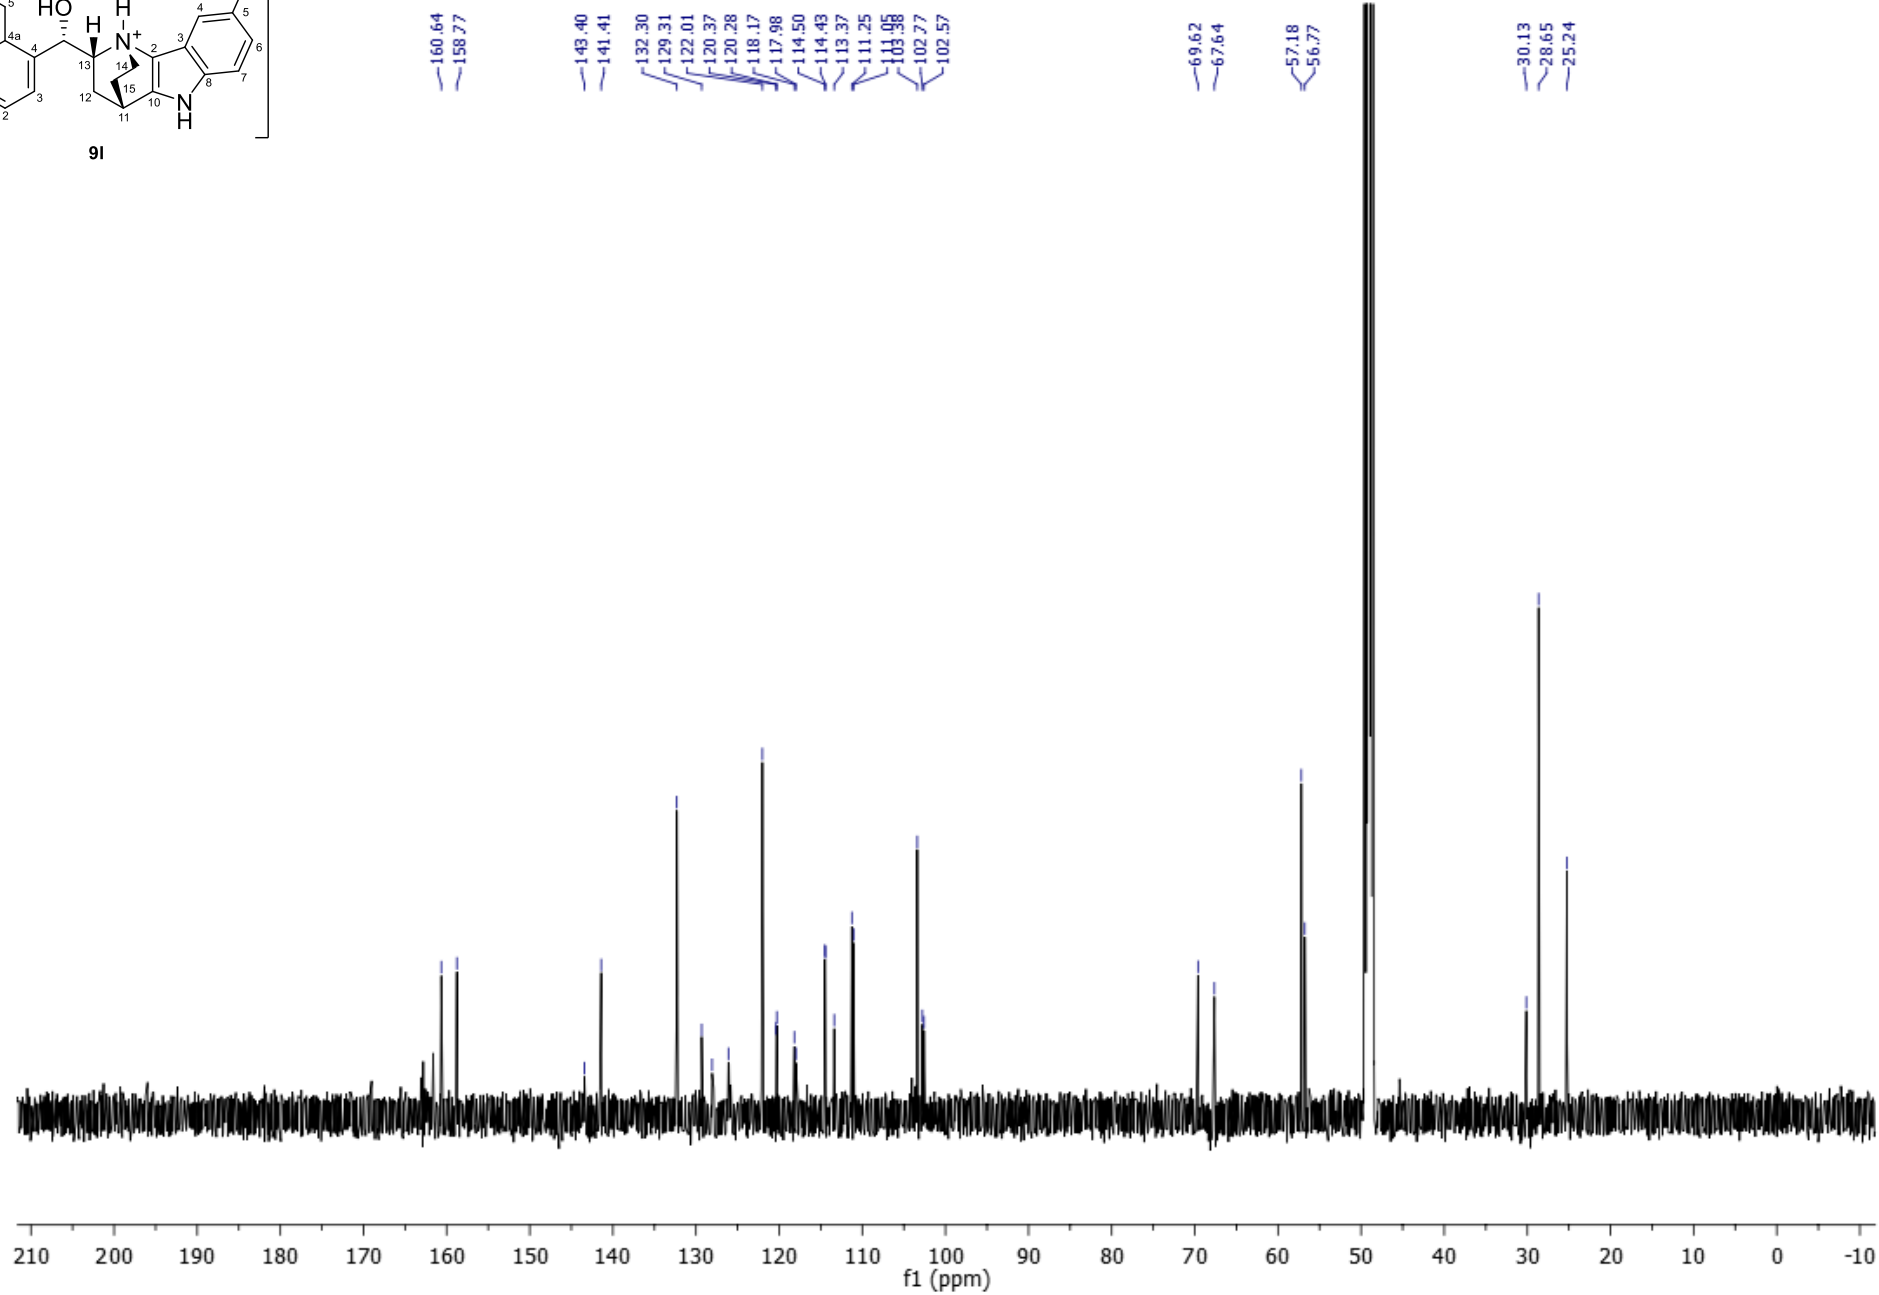

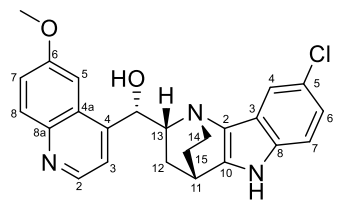

9m

178

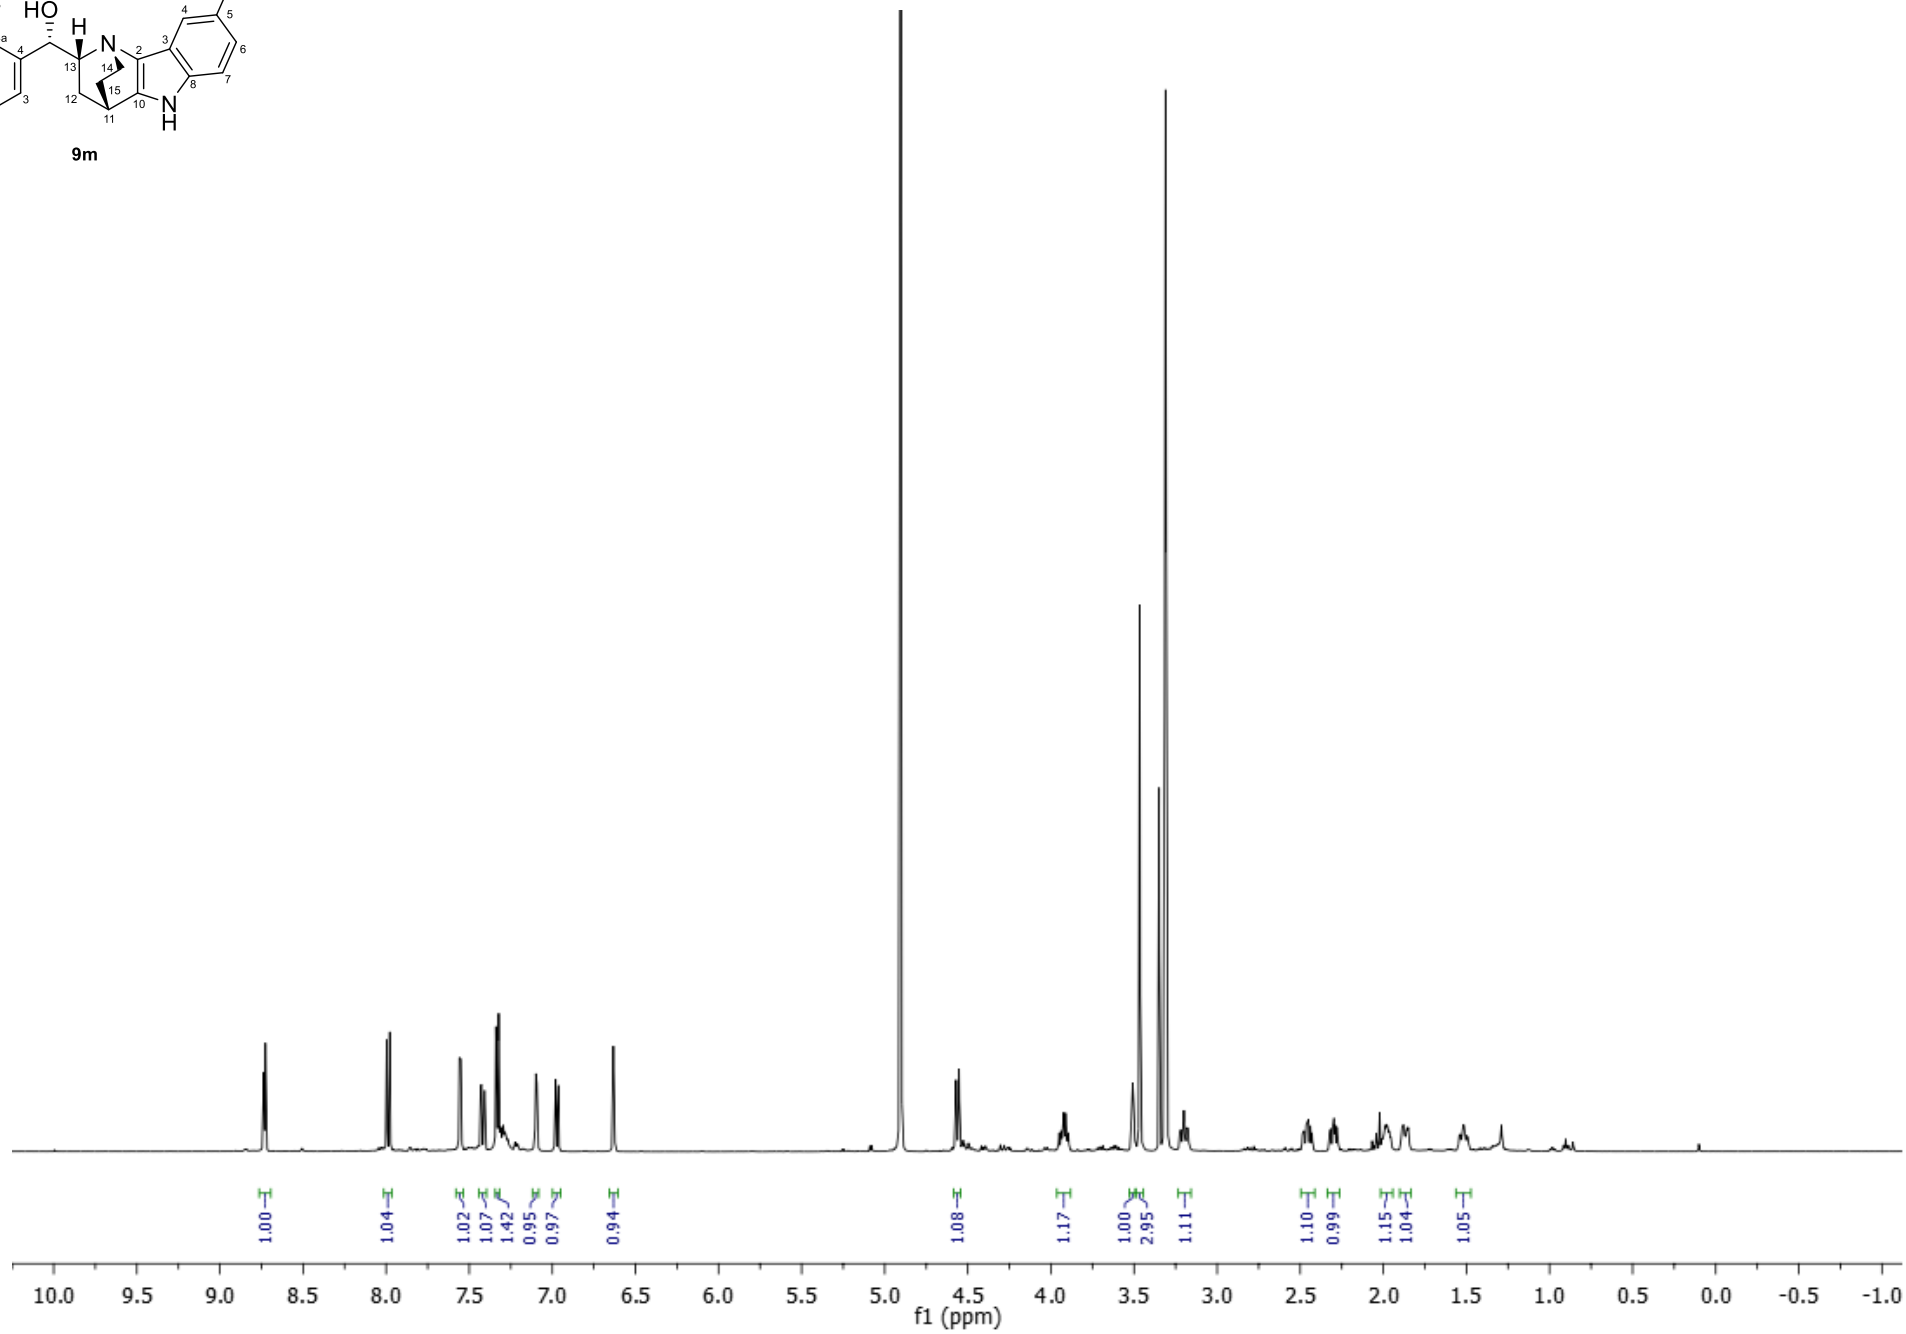

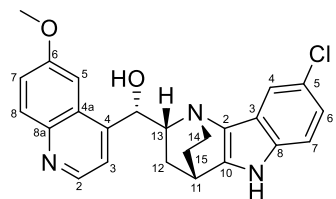

9m

179

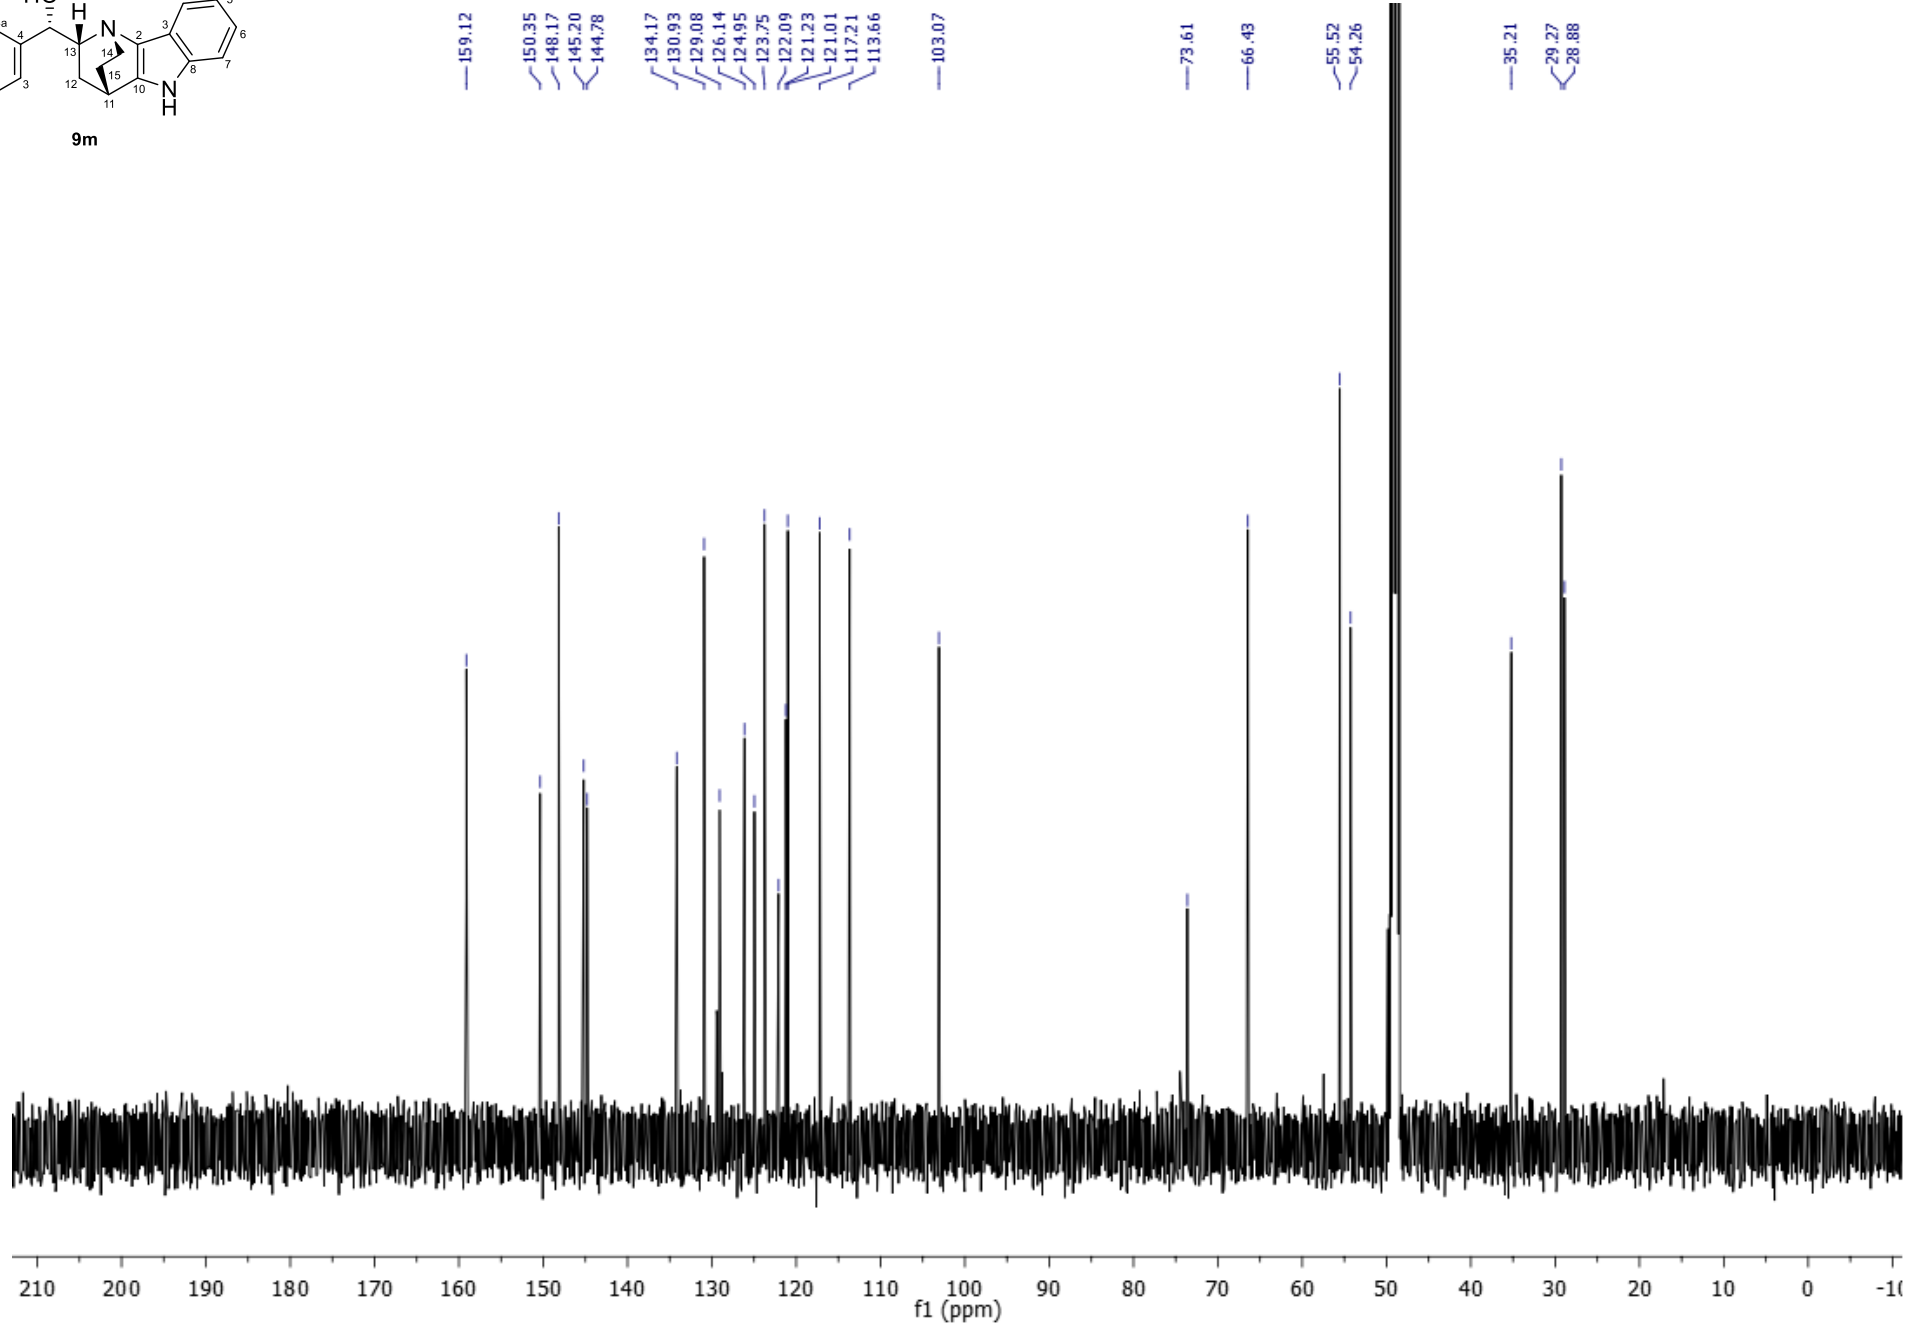

180

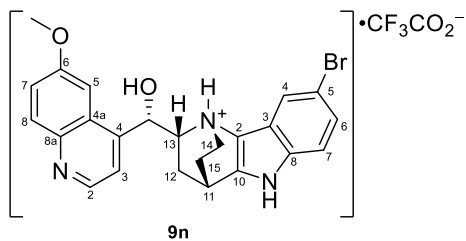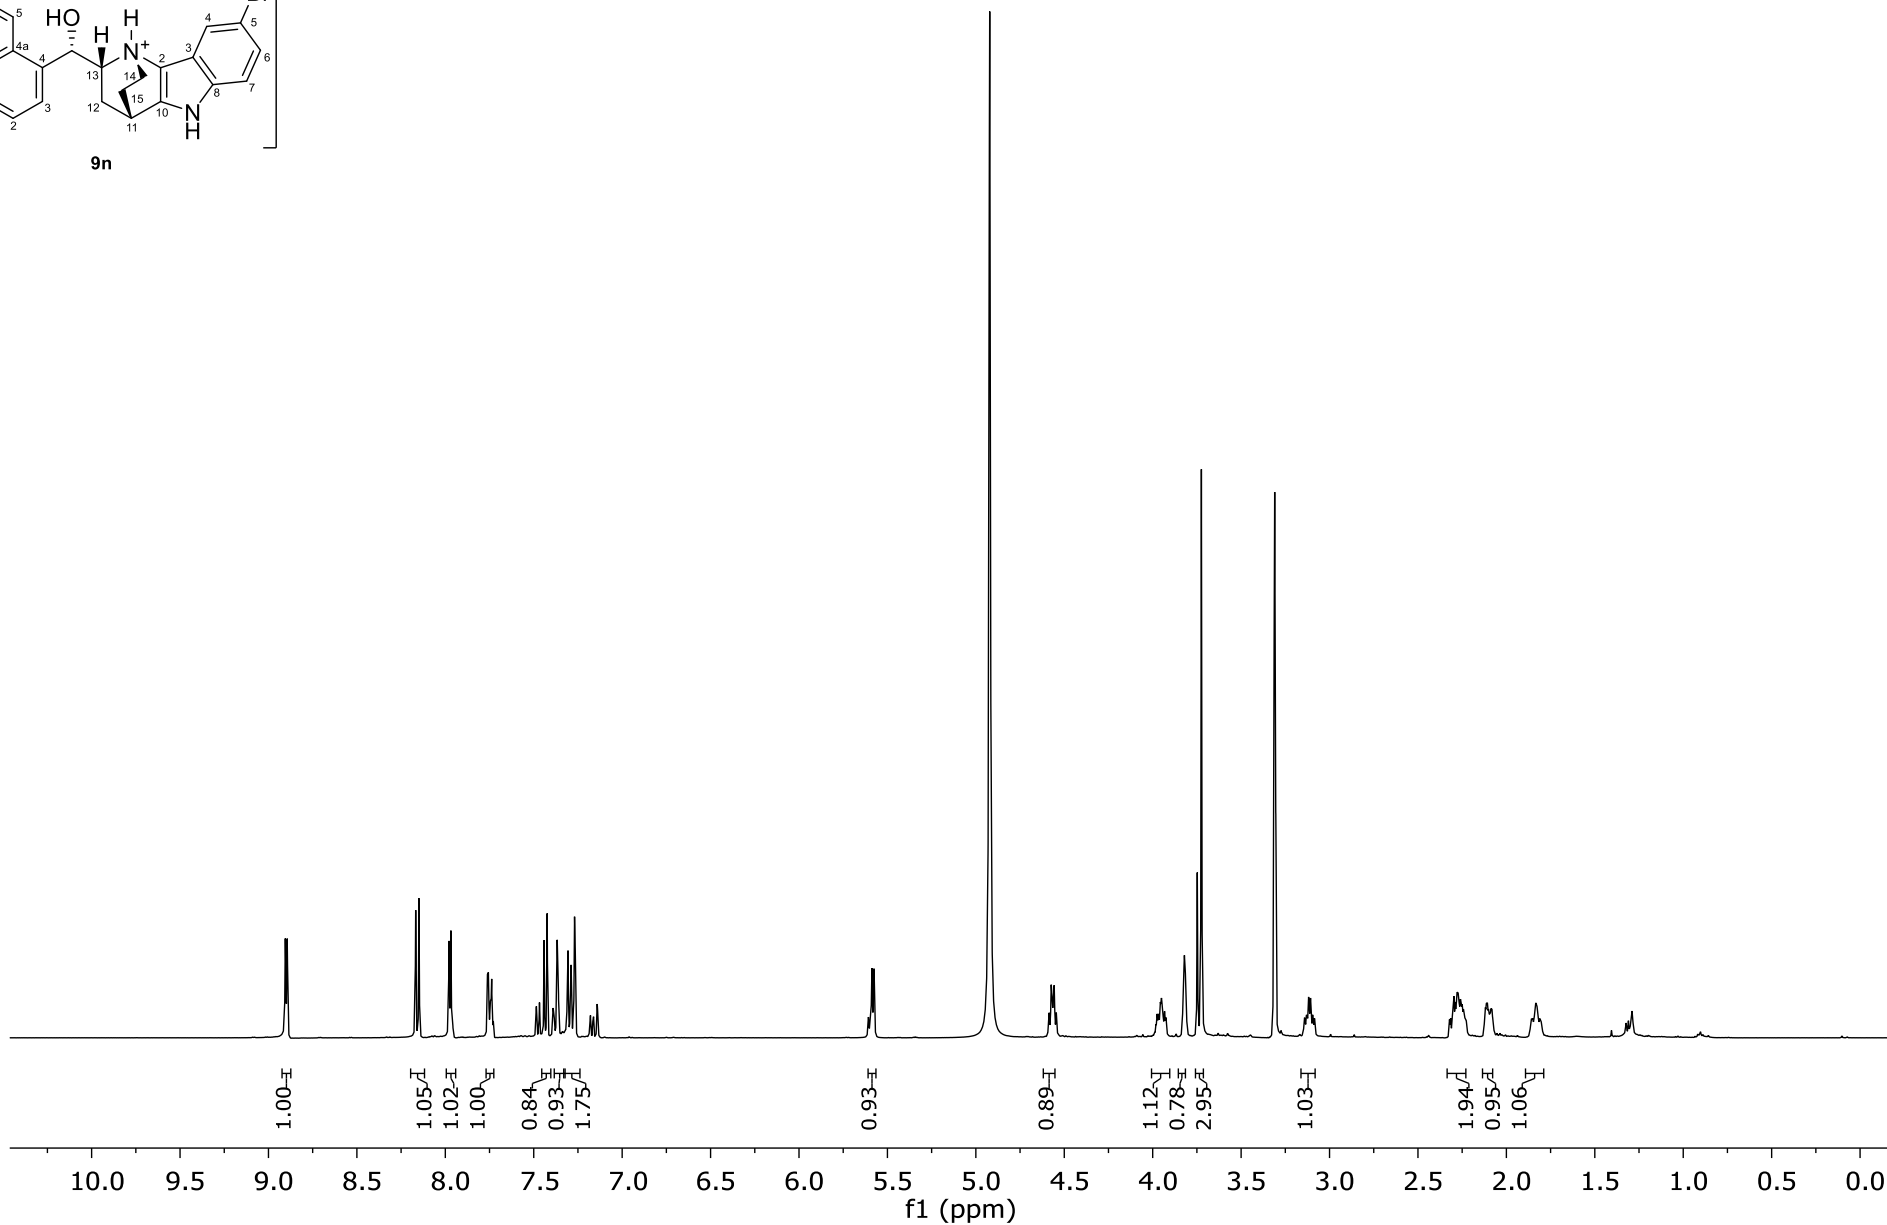

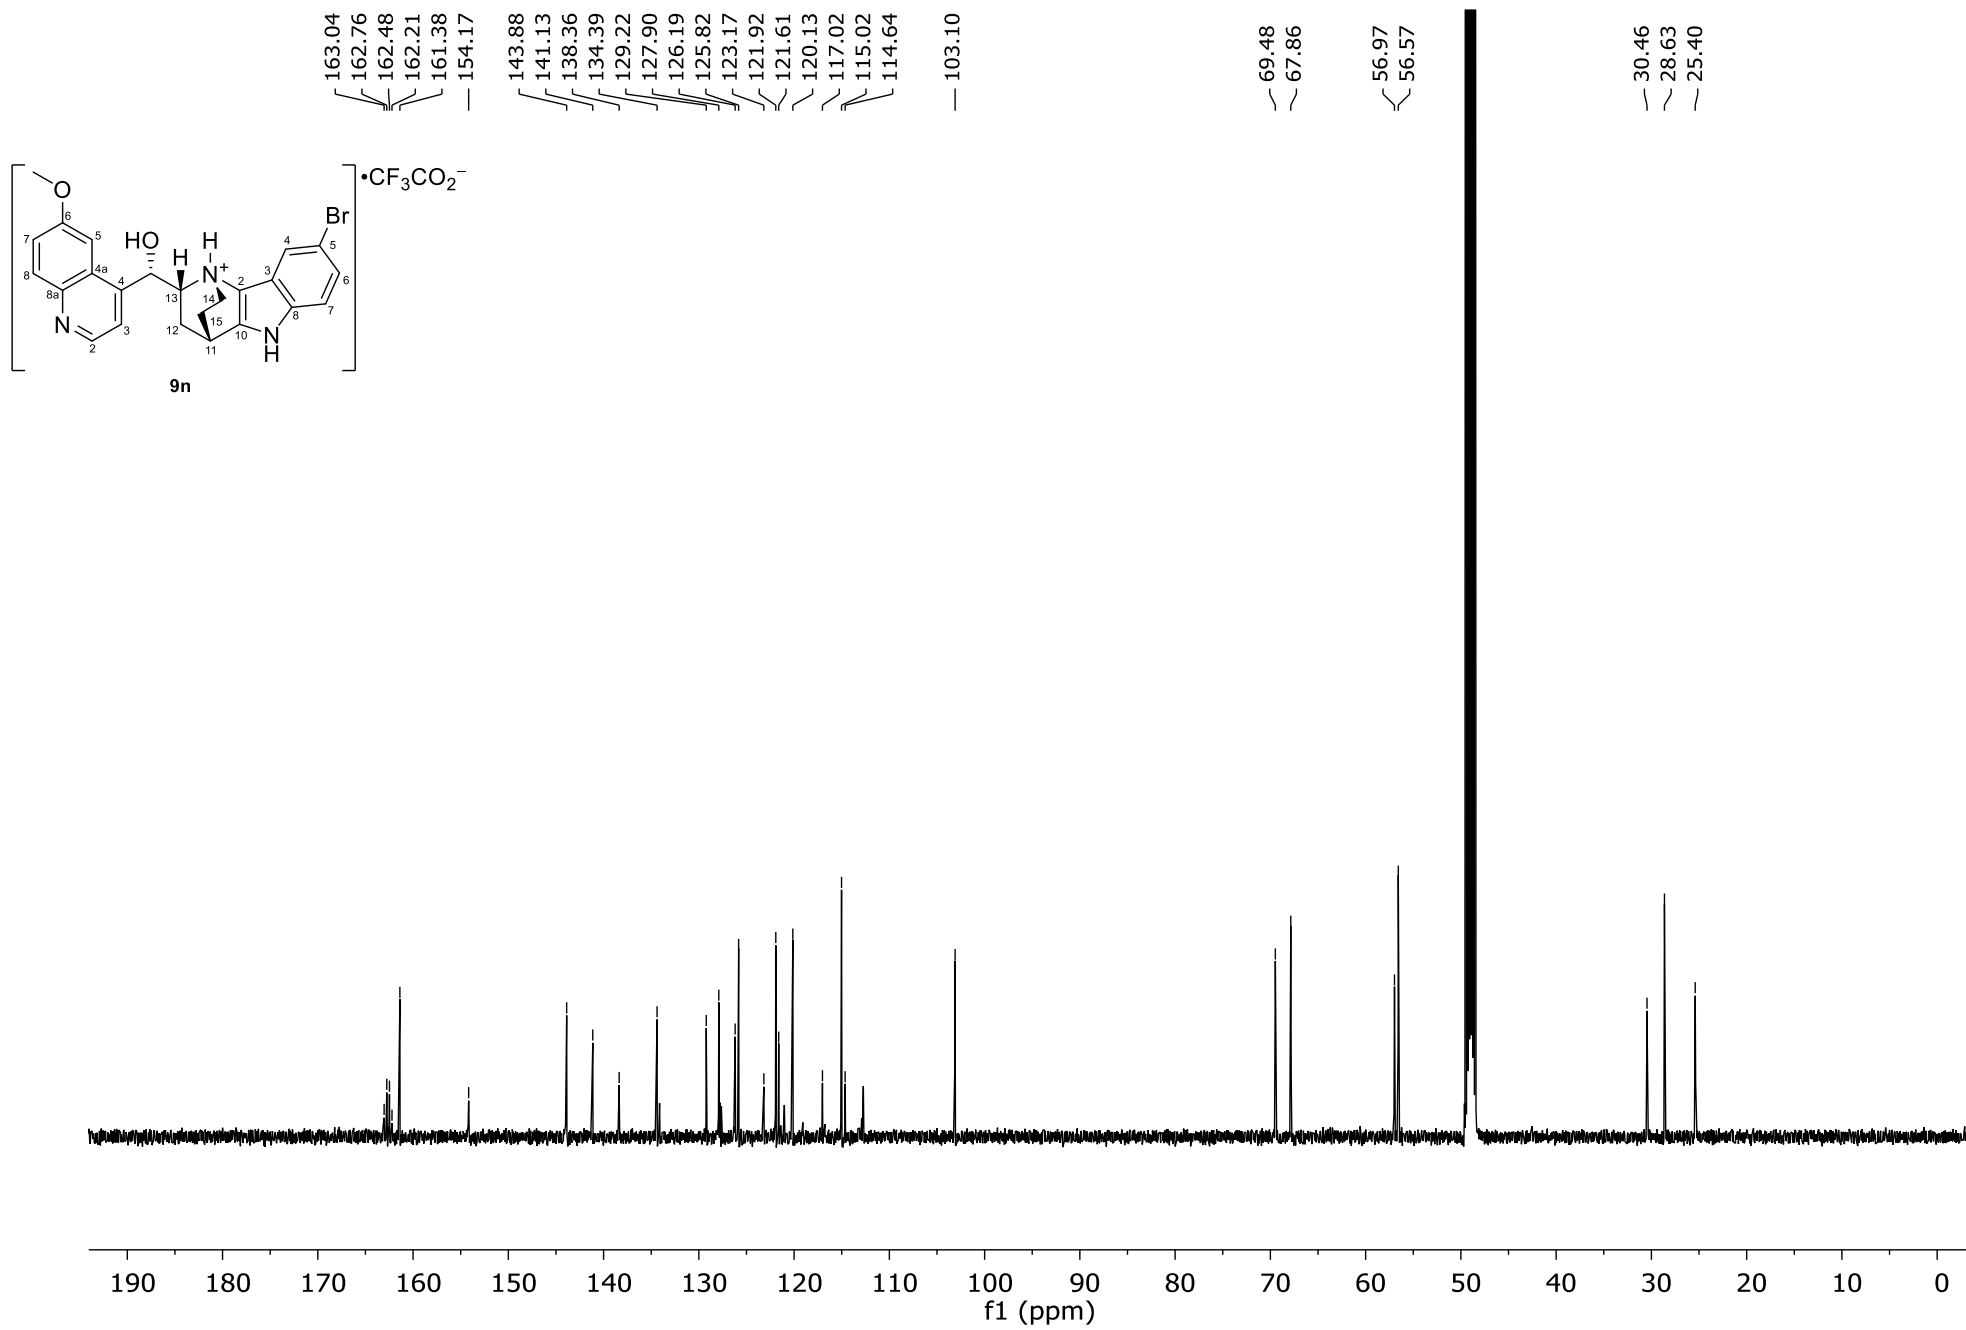

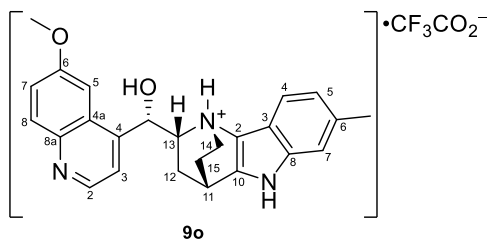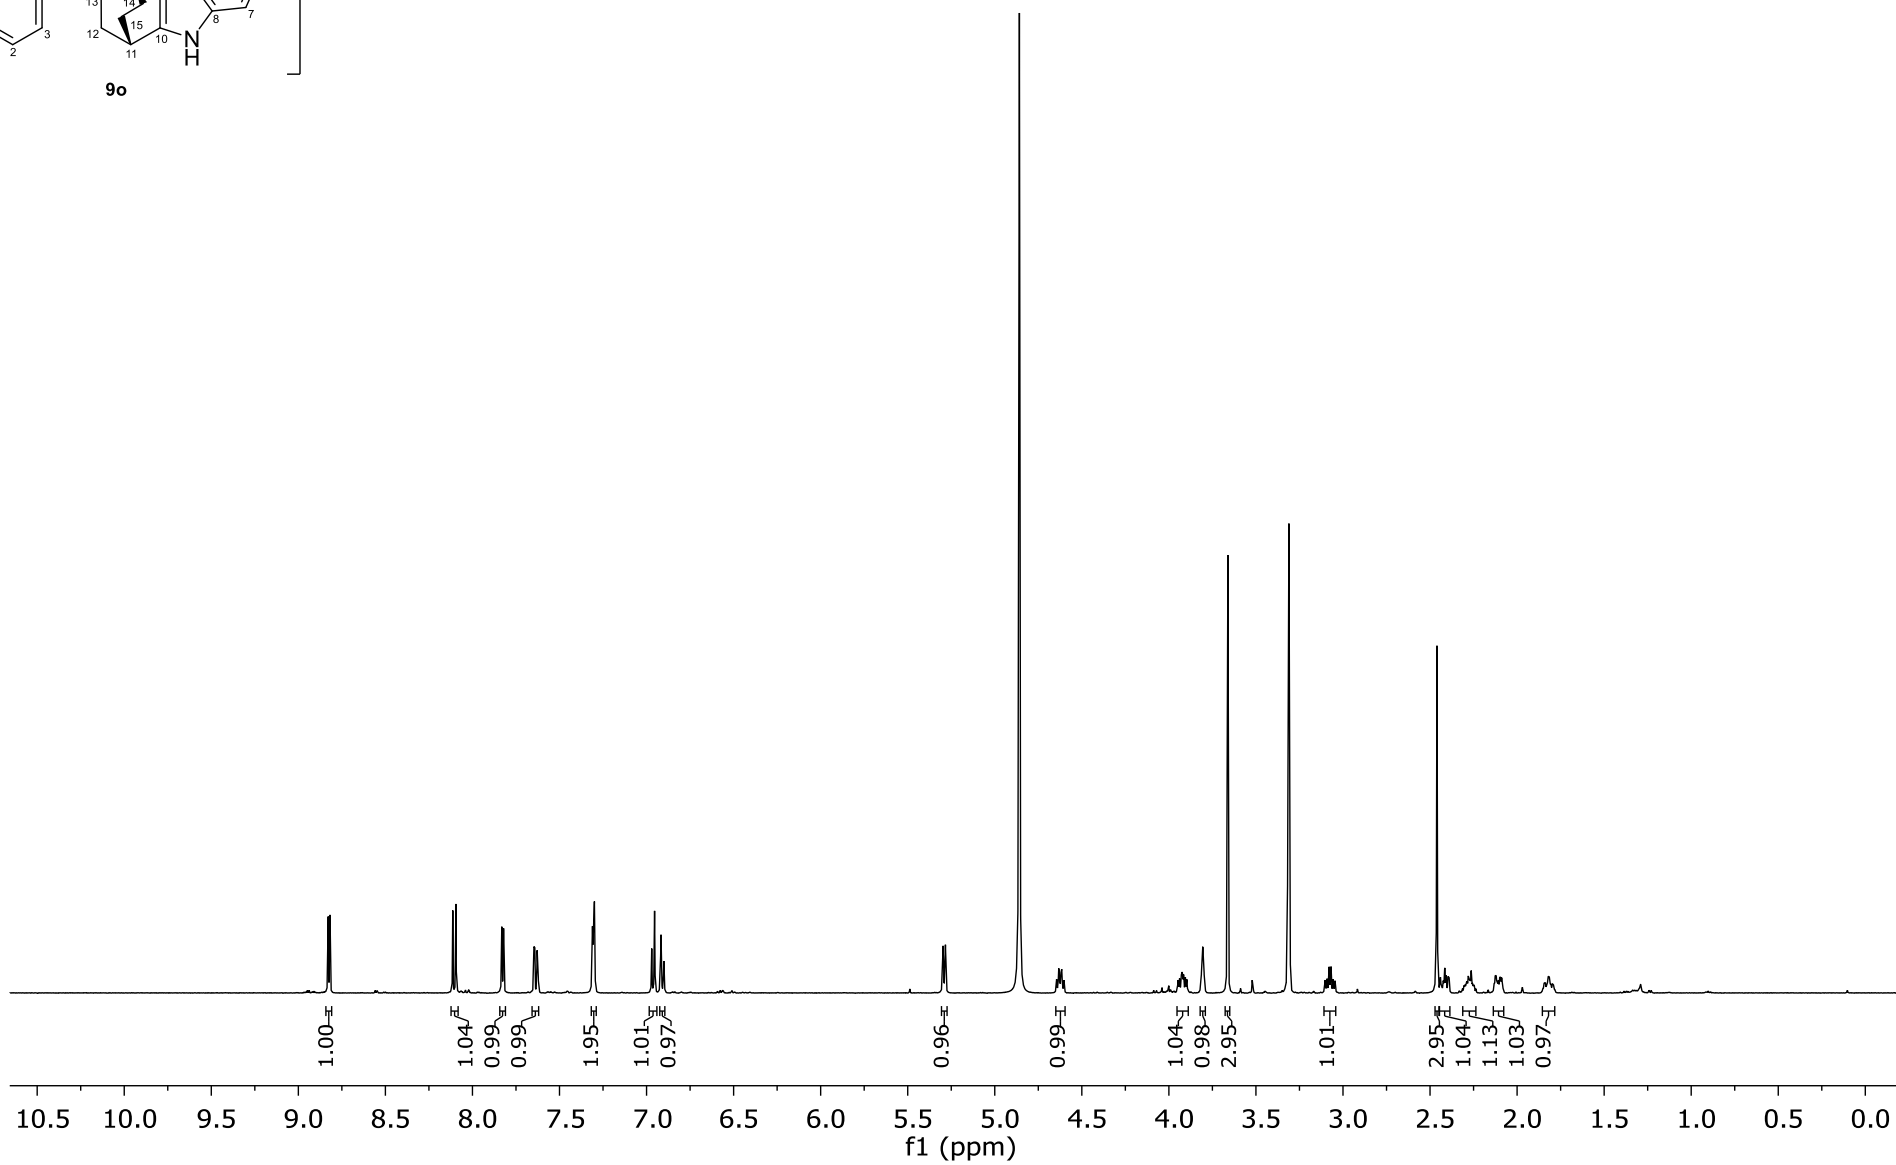

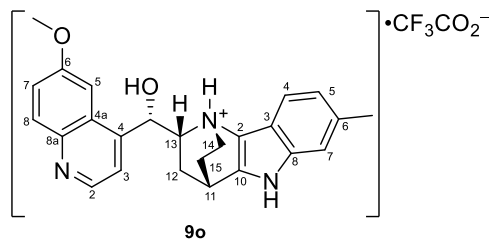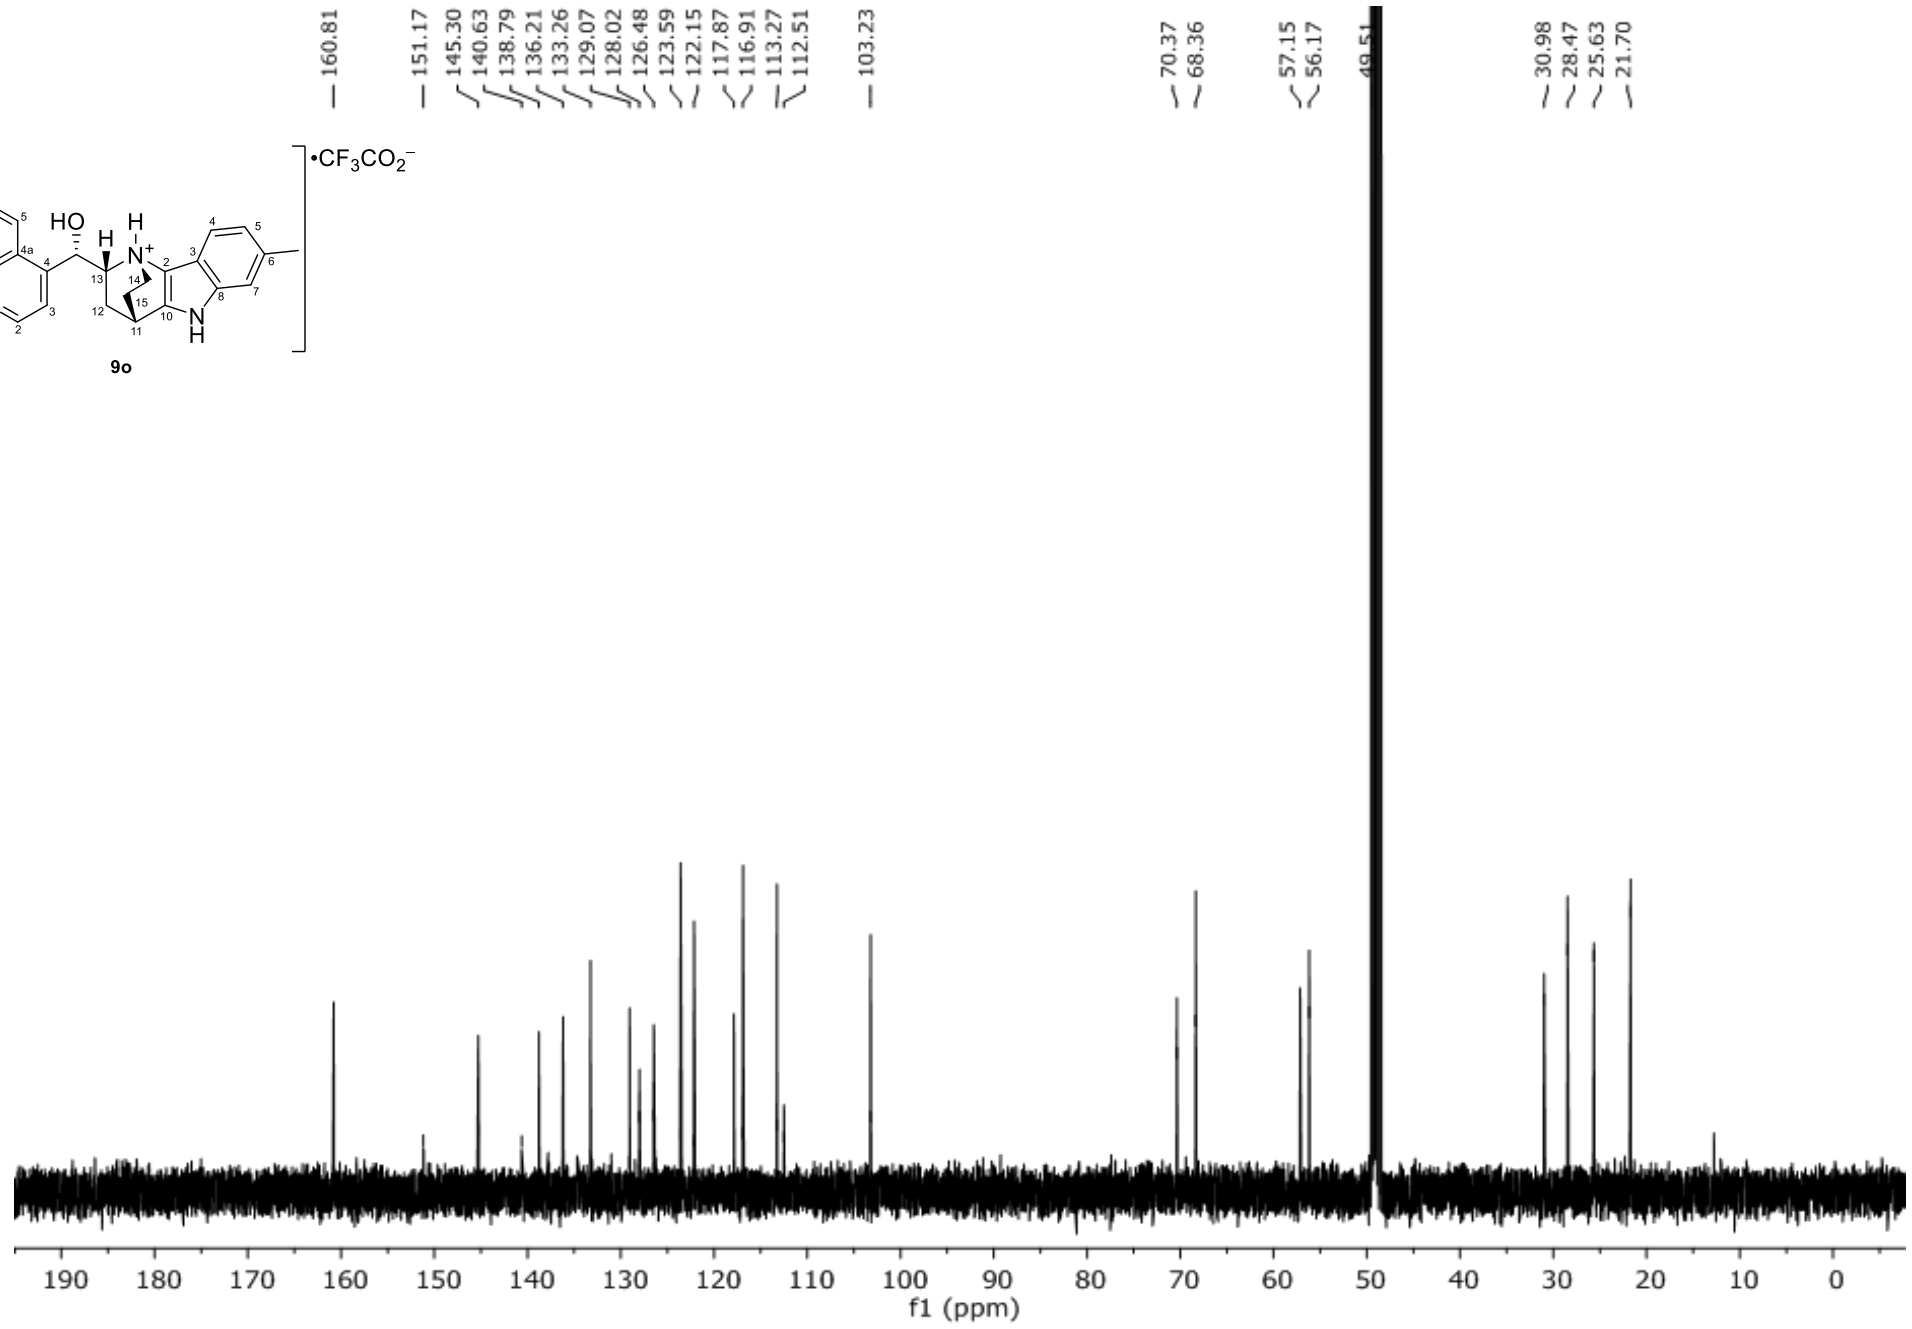



184

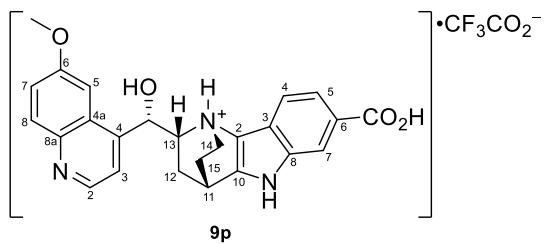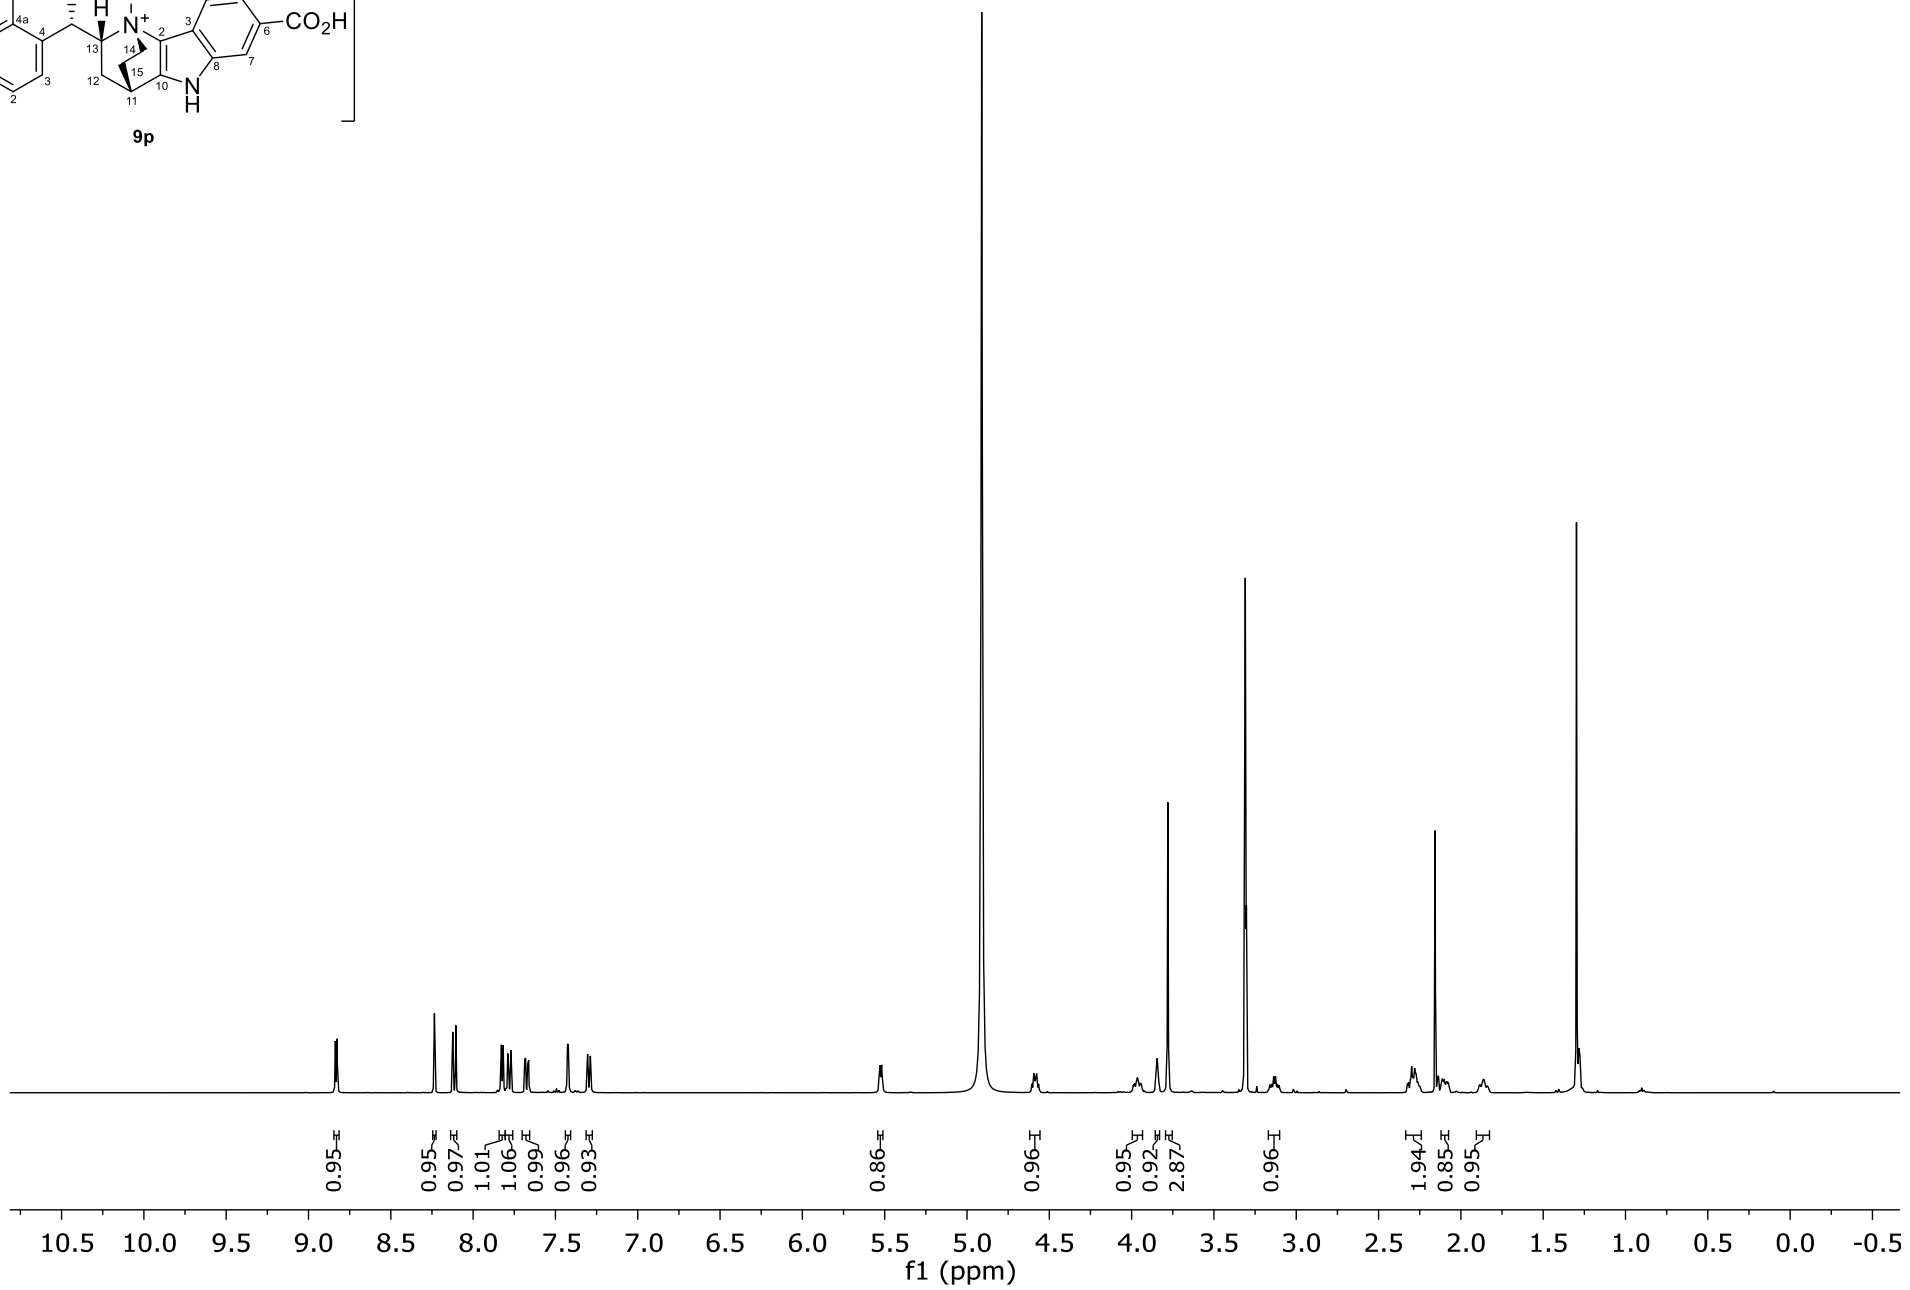

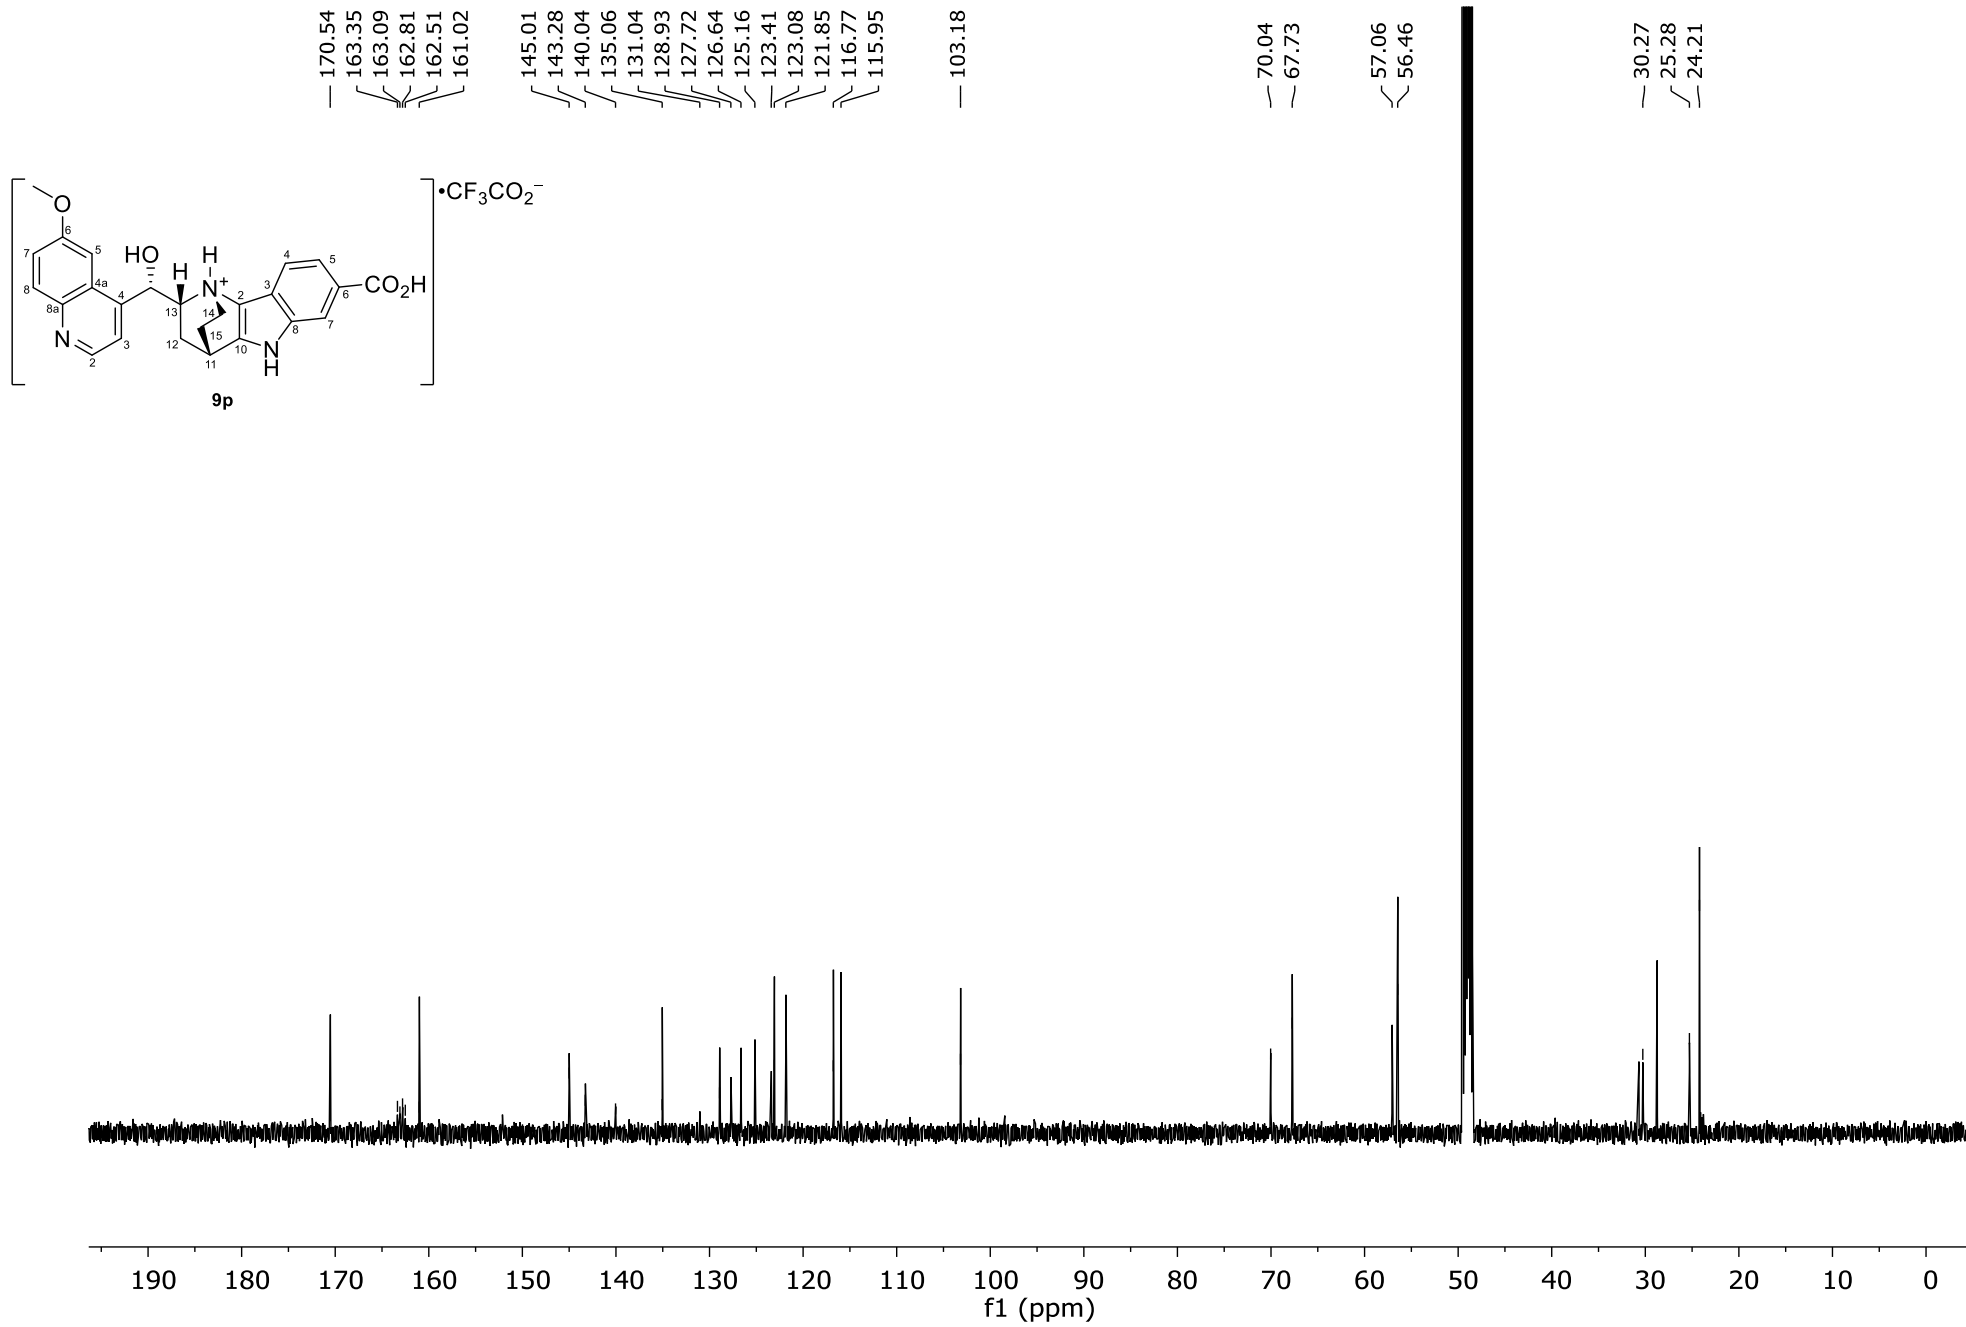

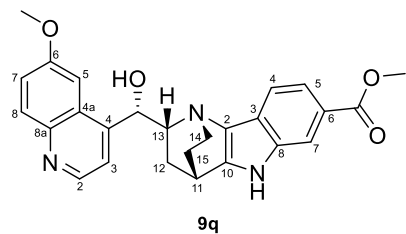

186

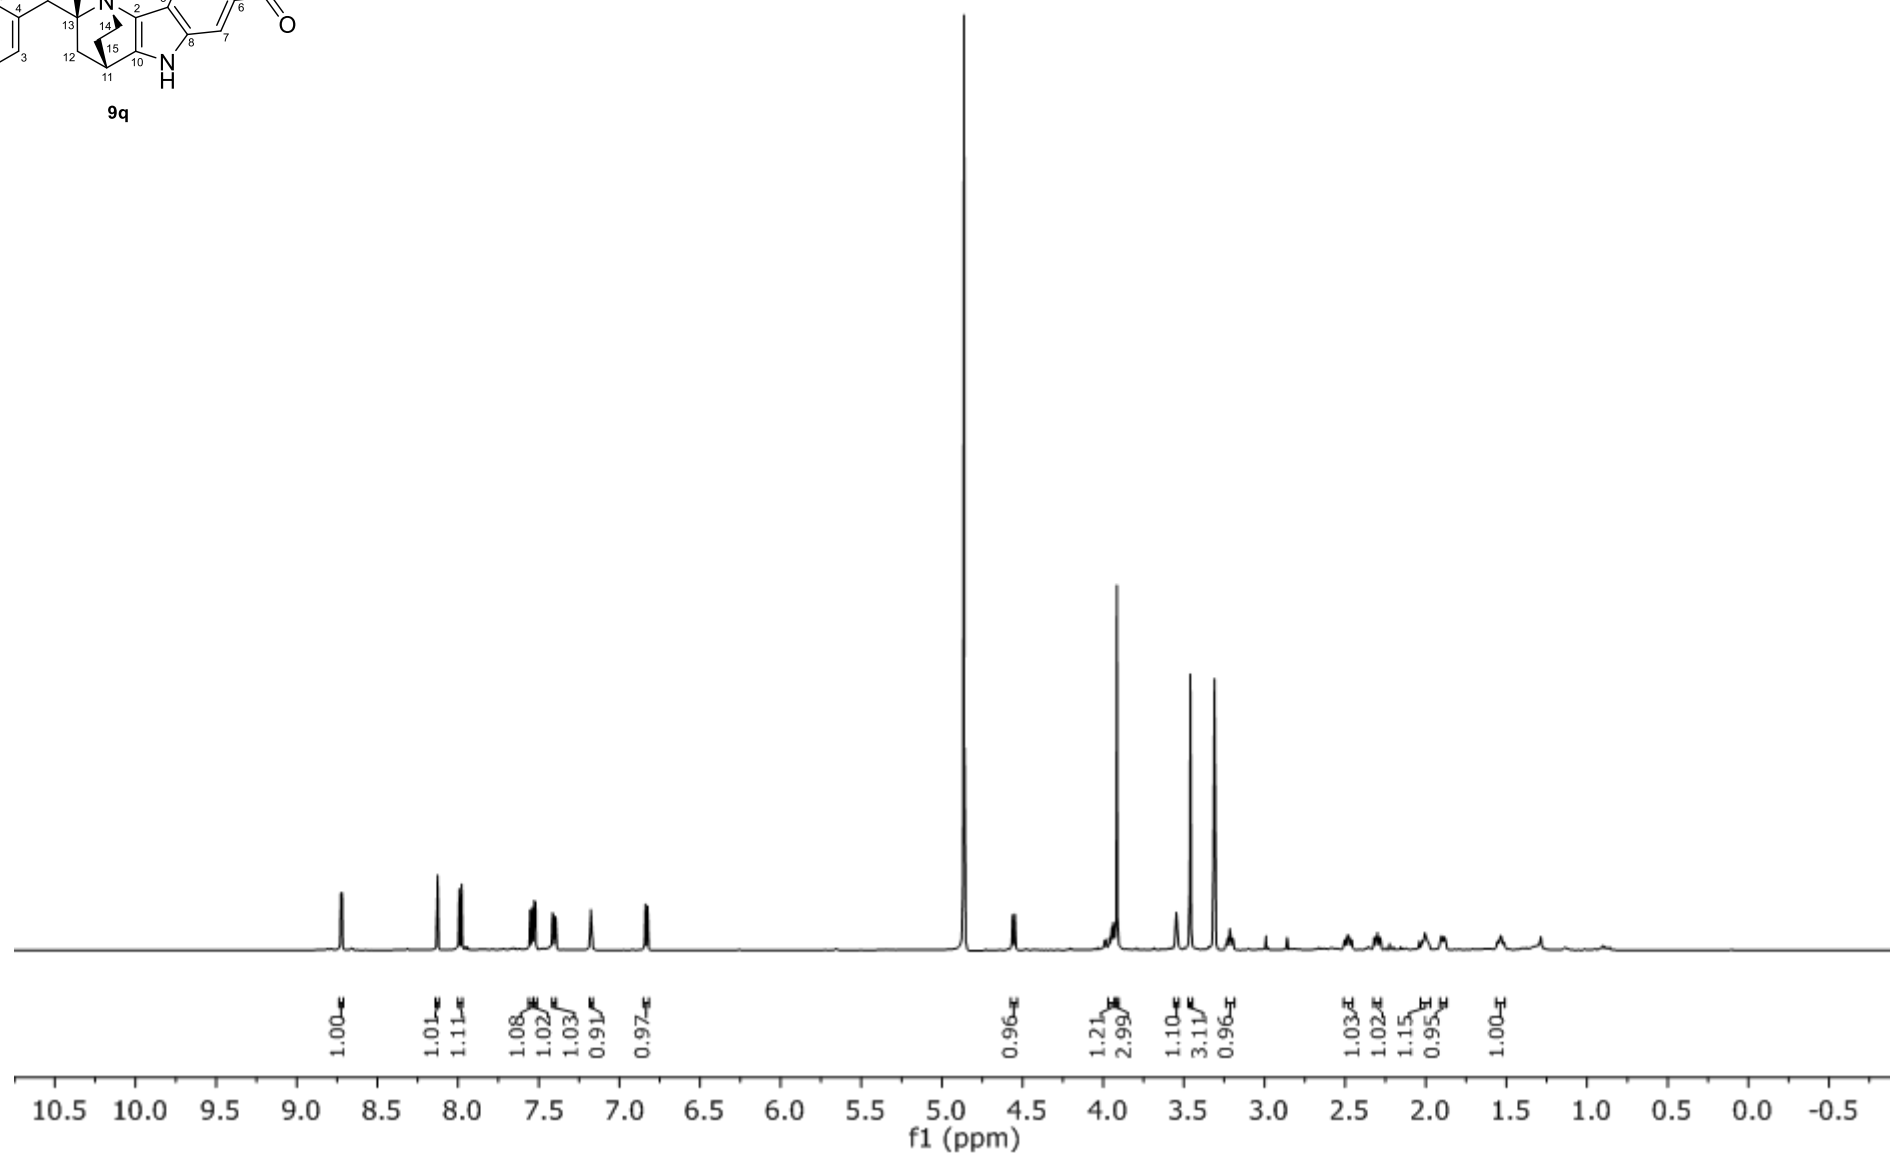

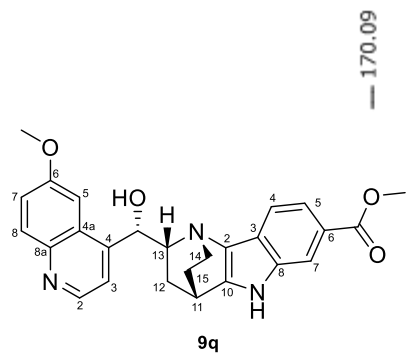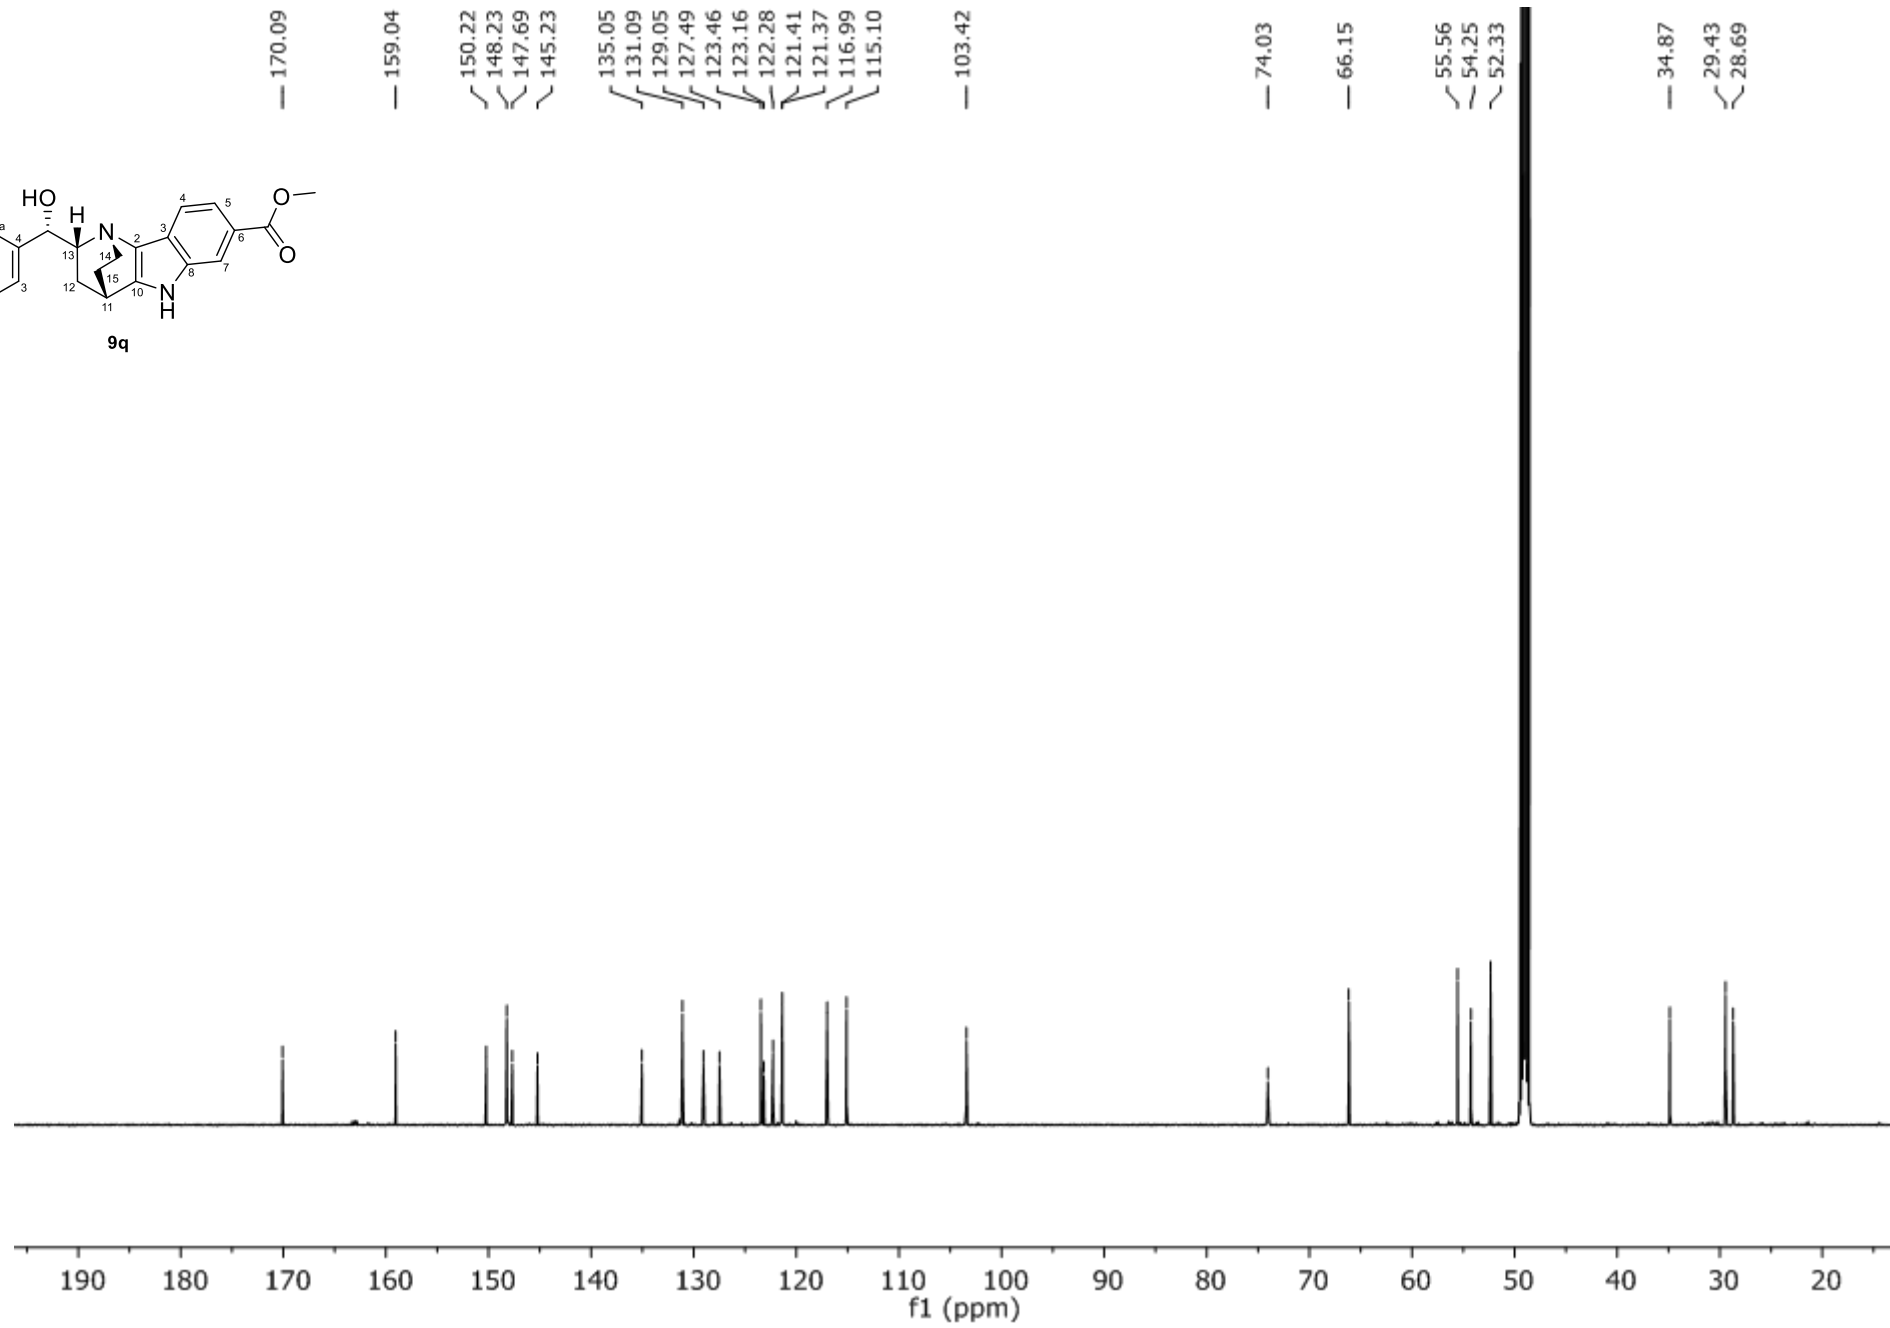

188

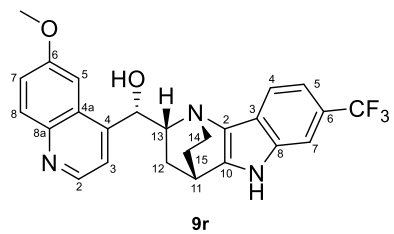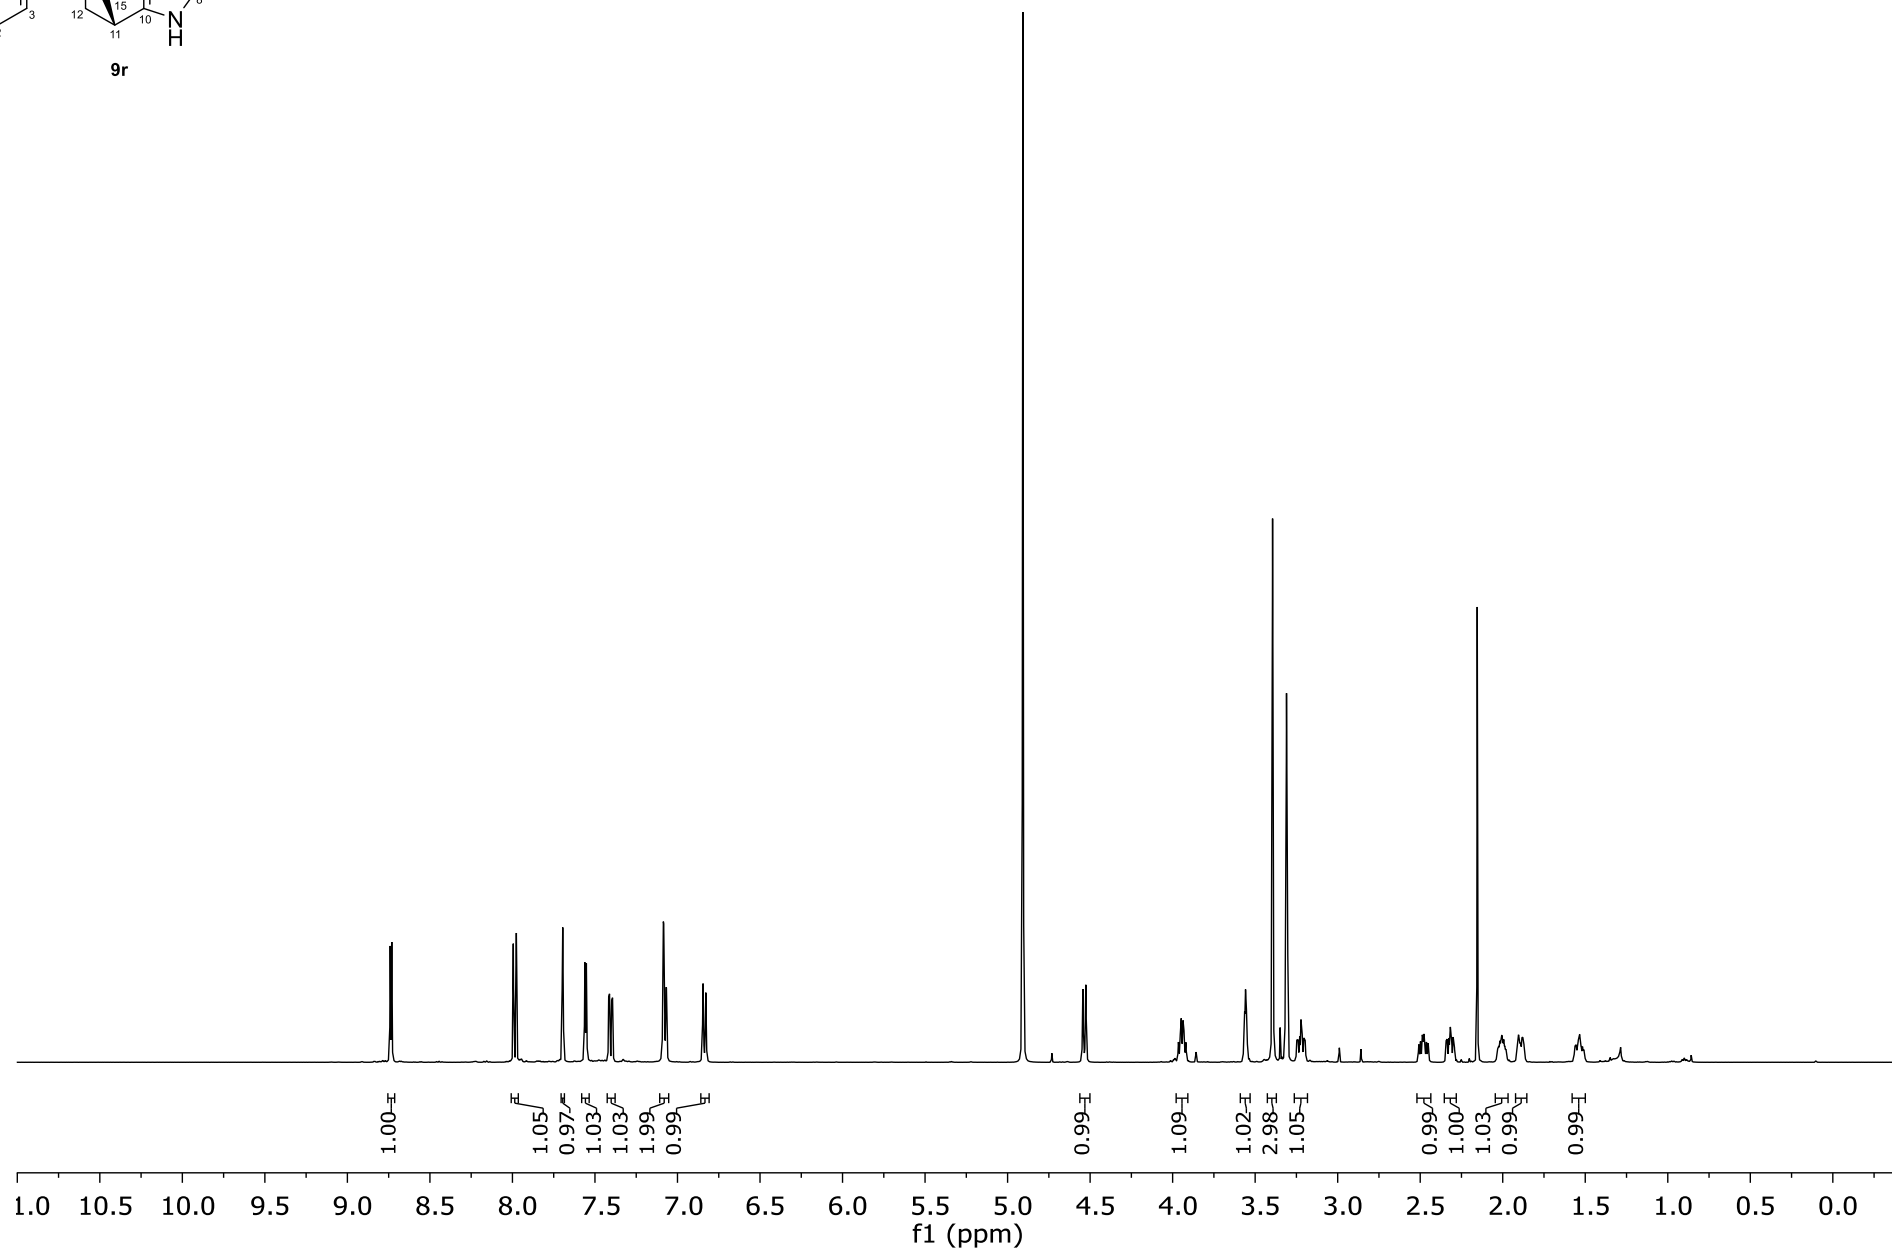

189

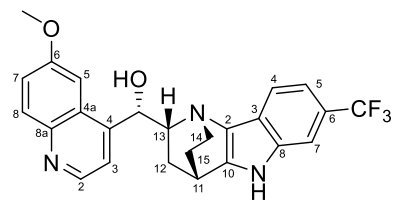

9r

- 159.02
- 150.32
- 148.26
- 146.57
- 145.19
- 134.57
- 131.07
- 130.25
- 129.05
- 128.10
- 126.18
- 125.95
- 123.80
- 123.57
- 123.11
- 122.85
- 122.60
- 122.35
- 121.30
- 117.88
- 116.68
- 116.65
- 116.62
- 116.60
- 110.08
- 110.05
- 110.02
- 109.98
- 73.69
- 66.30
- 55.49
- 54.21
- 35.06
- 29.34
- 28.79

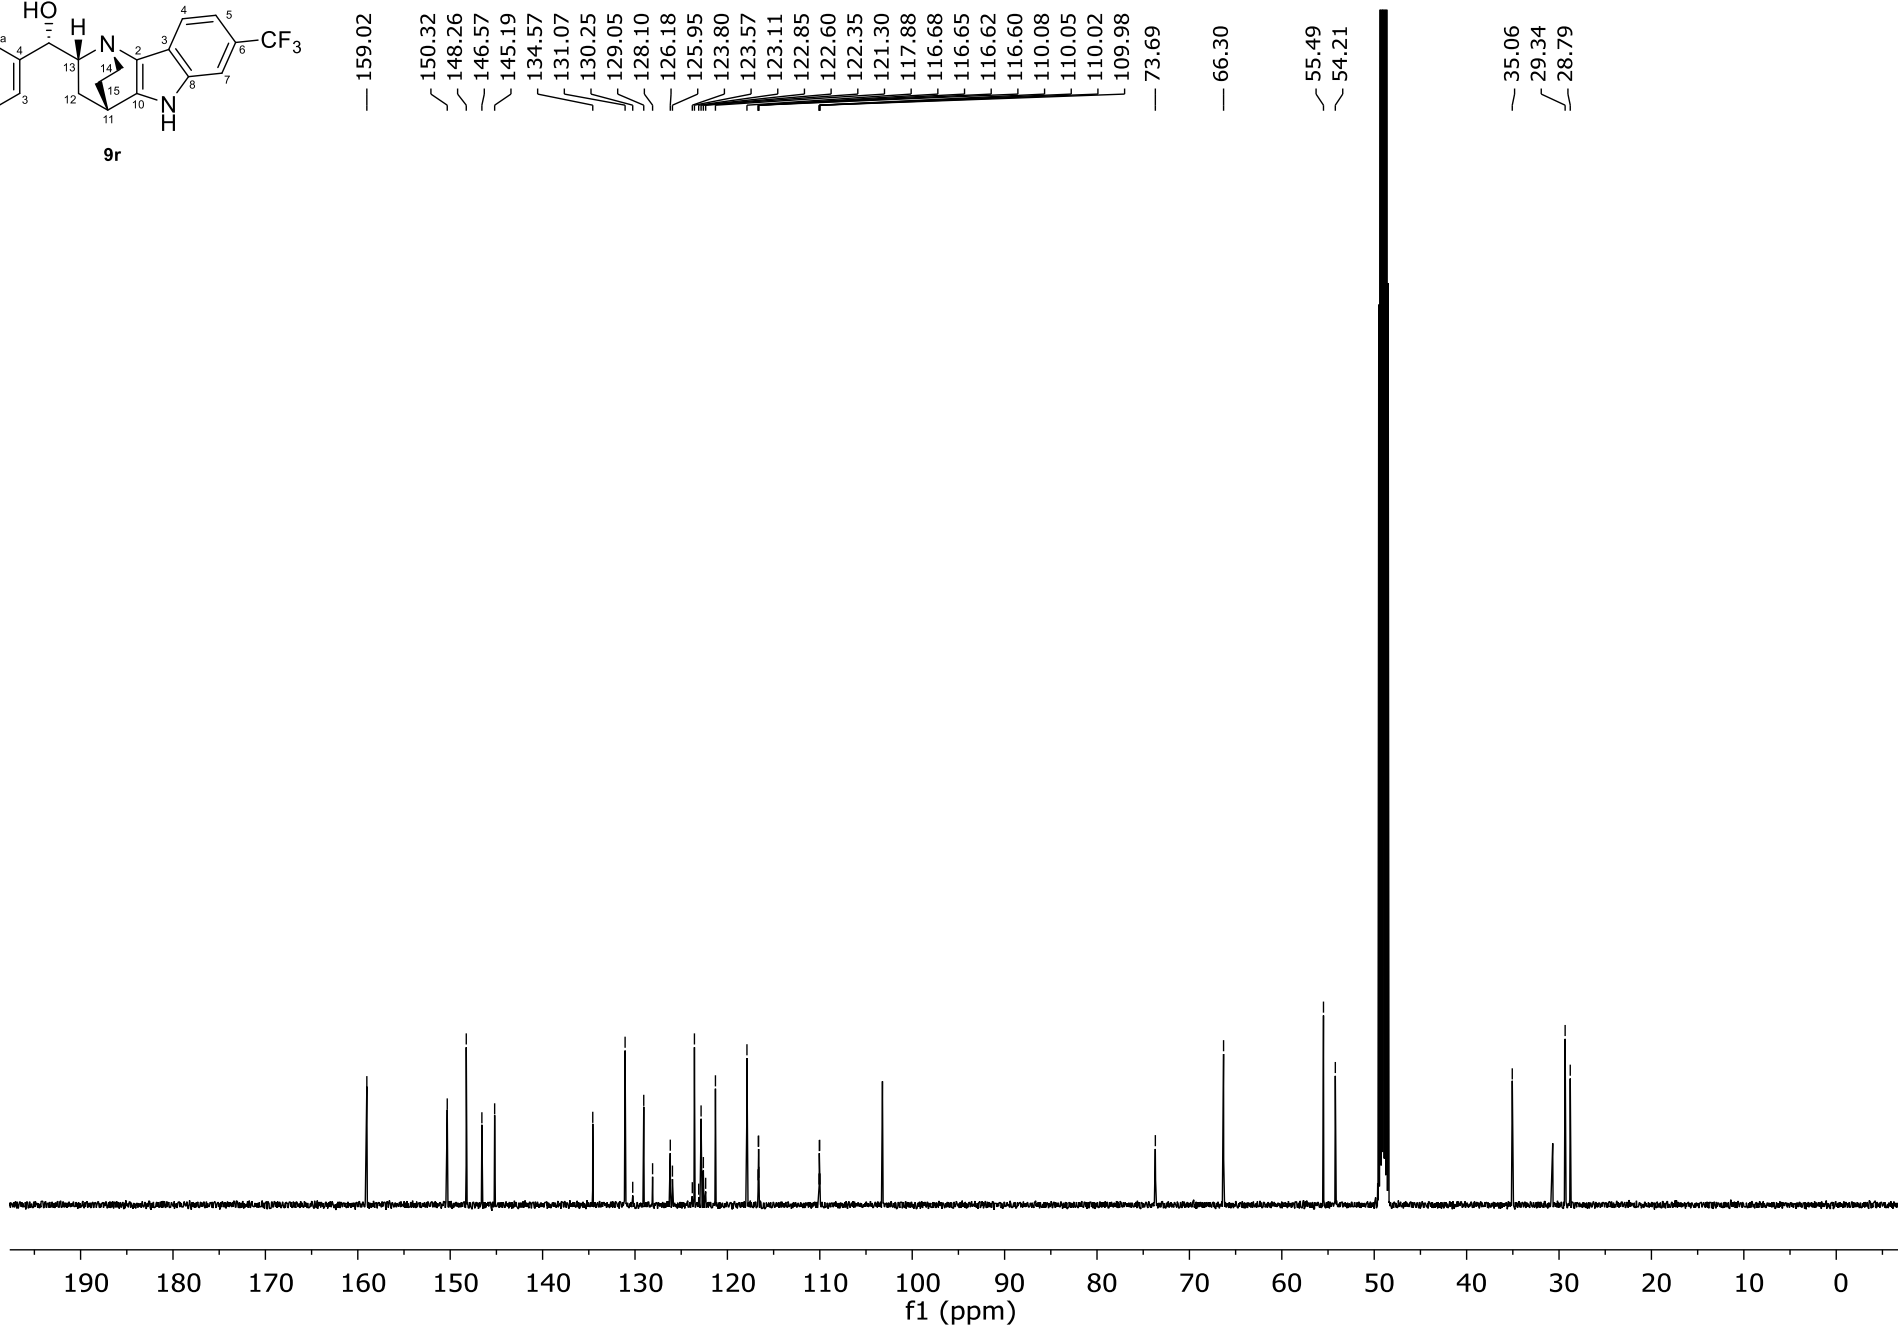

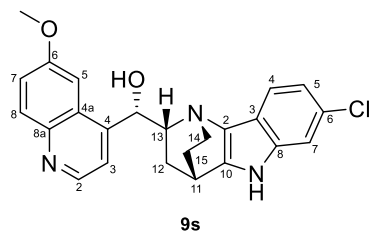

190

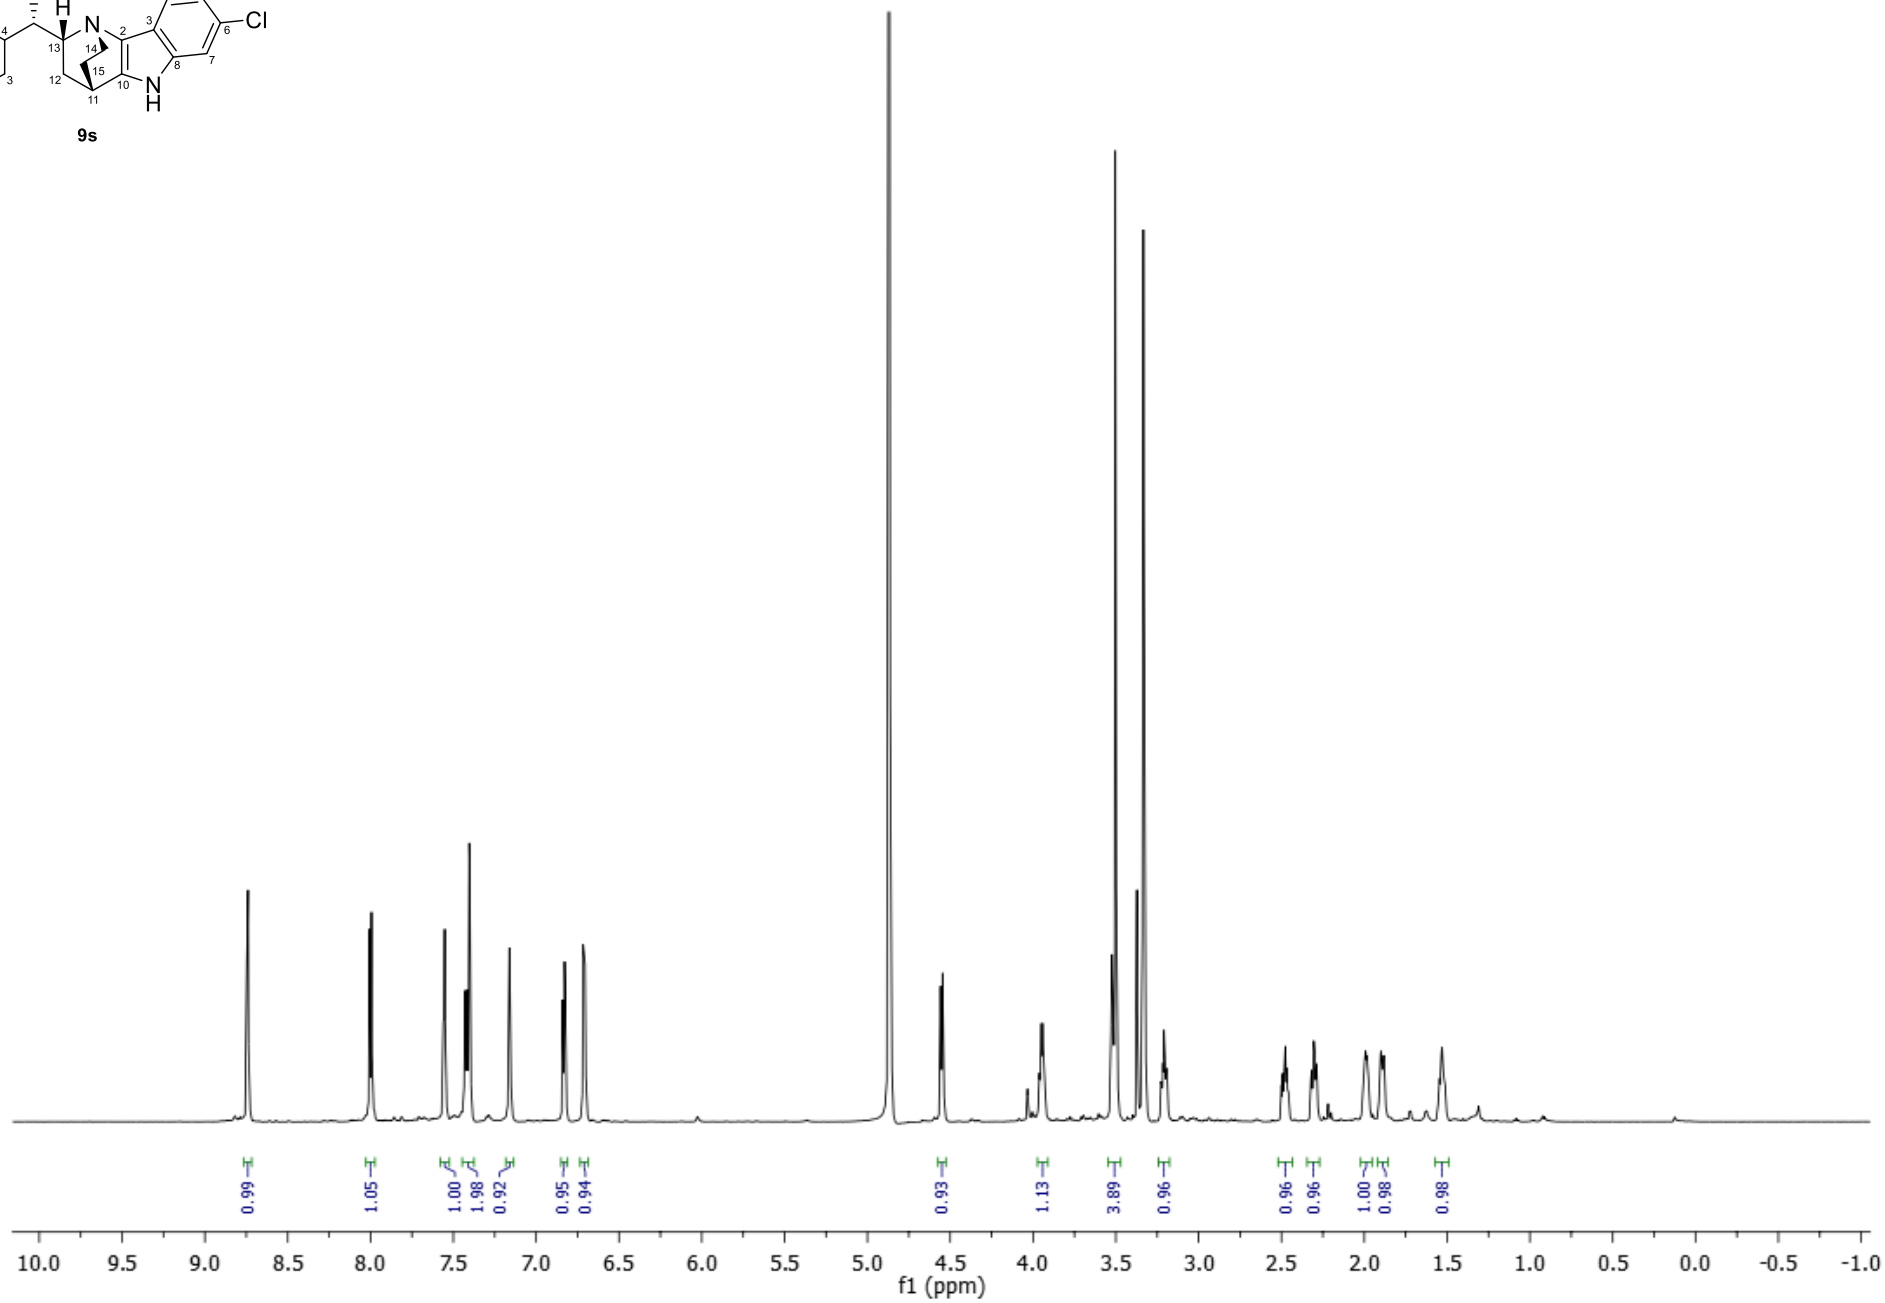

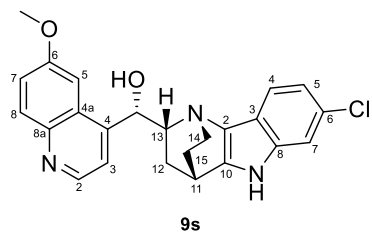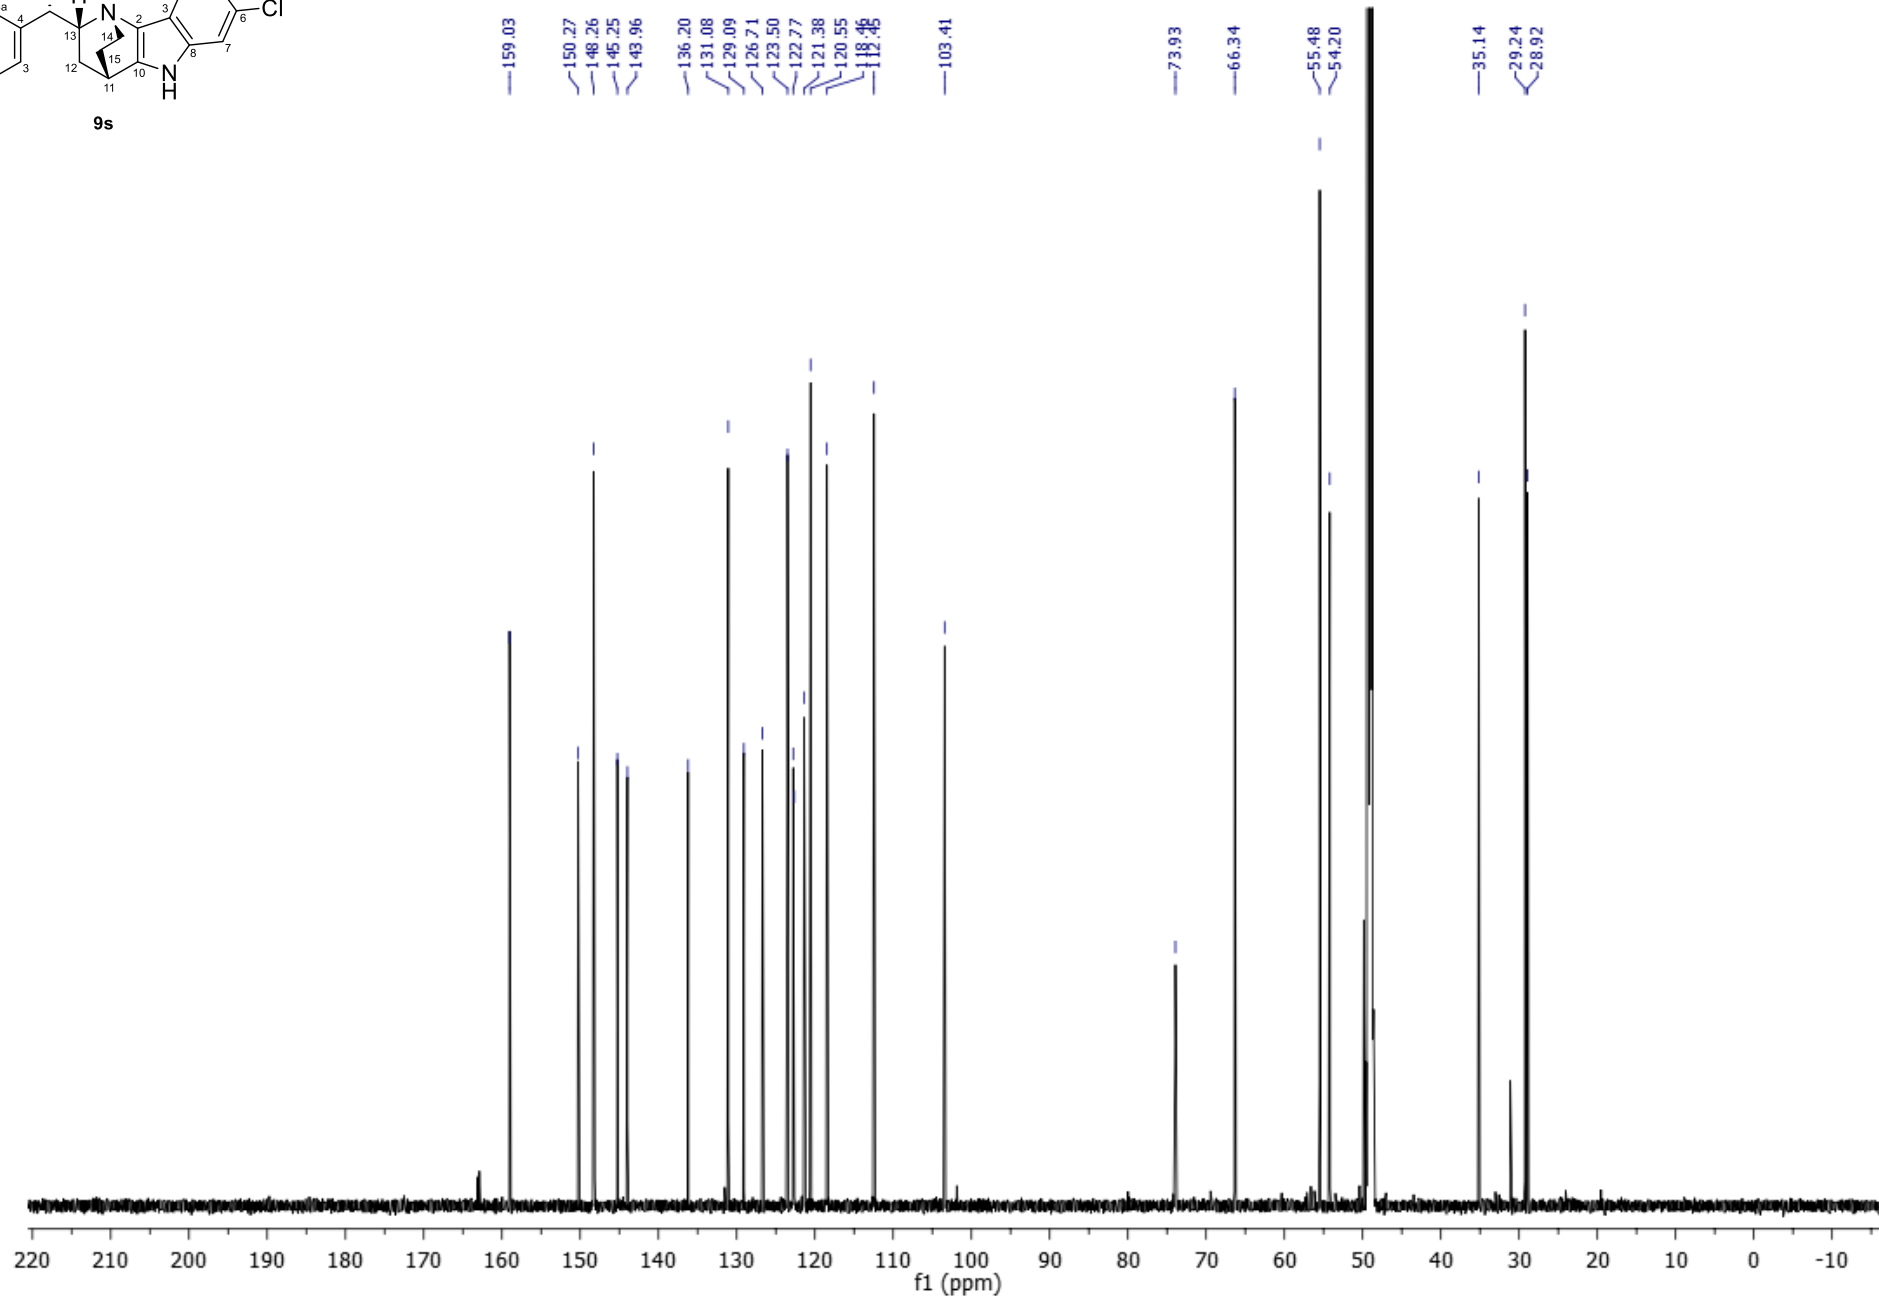



192

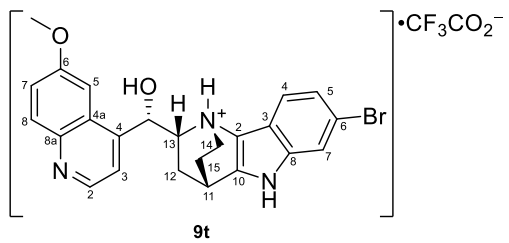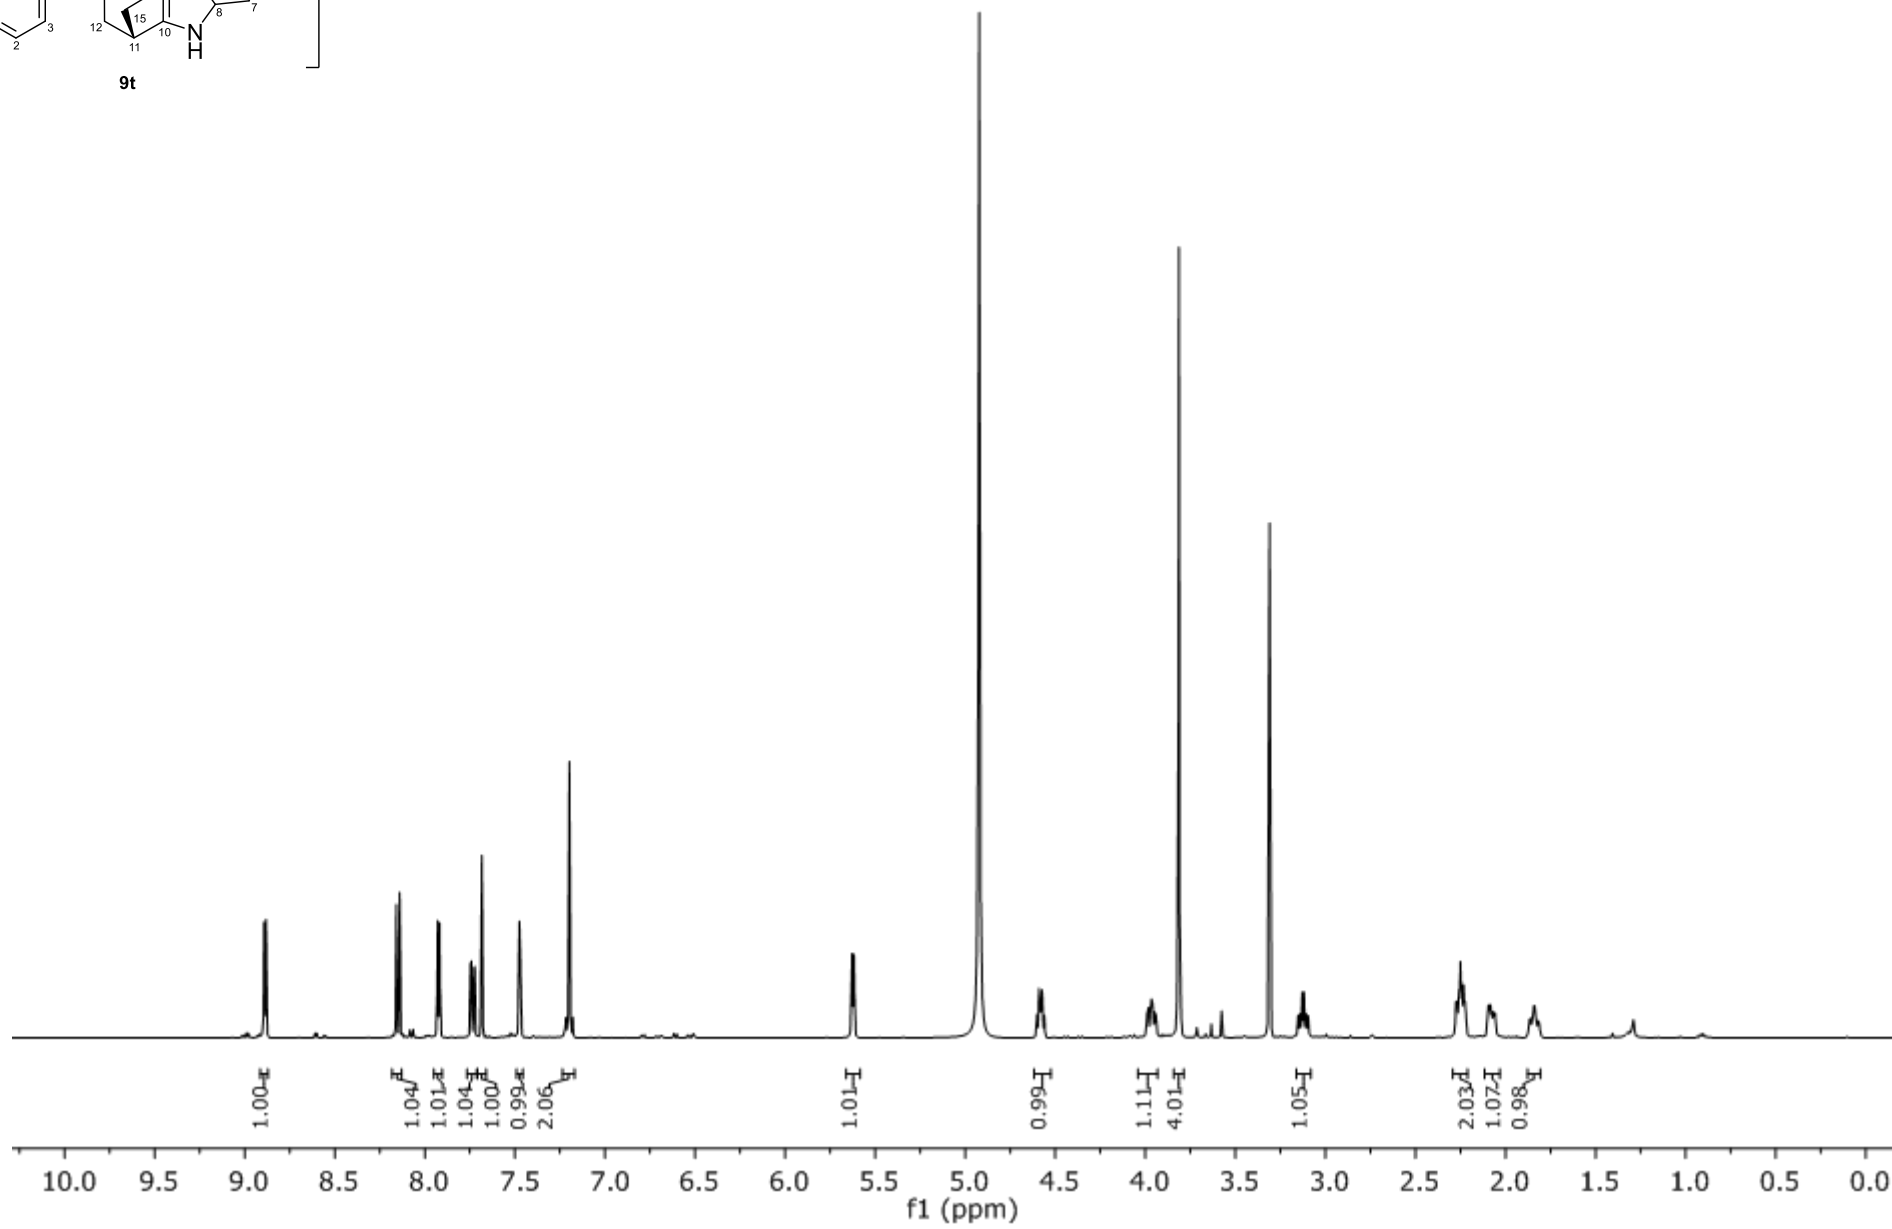

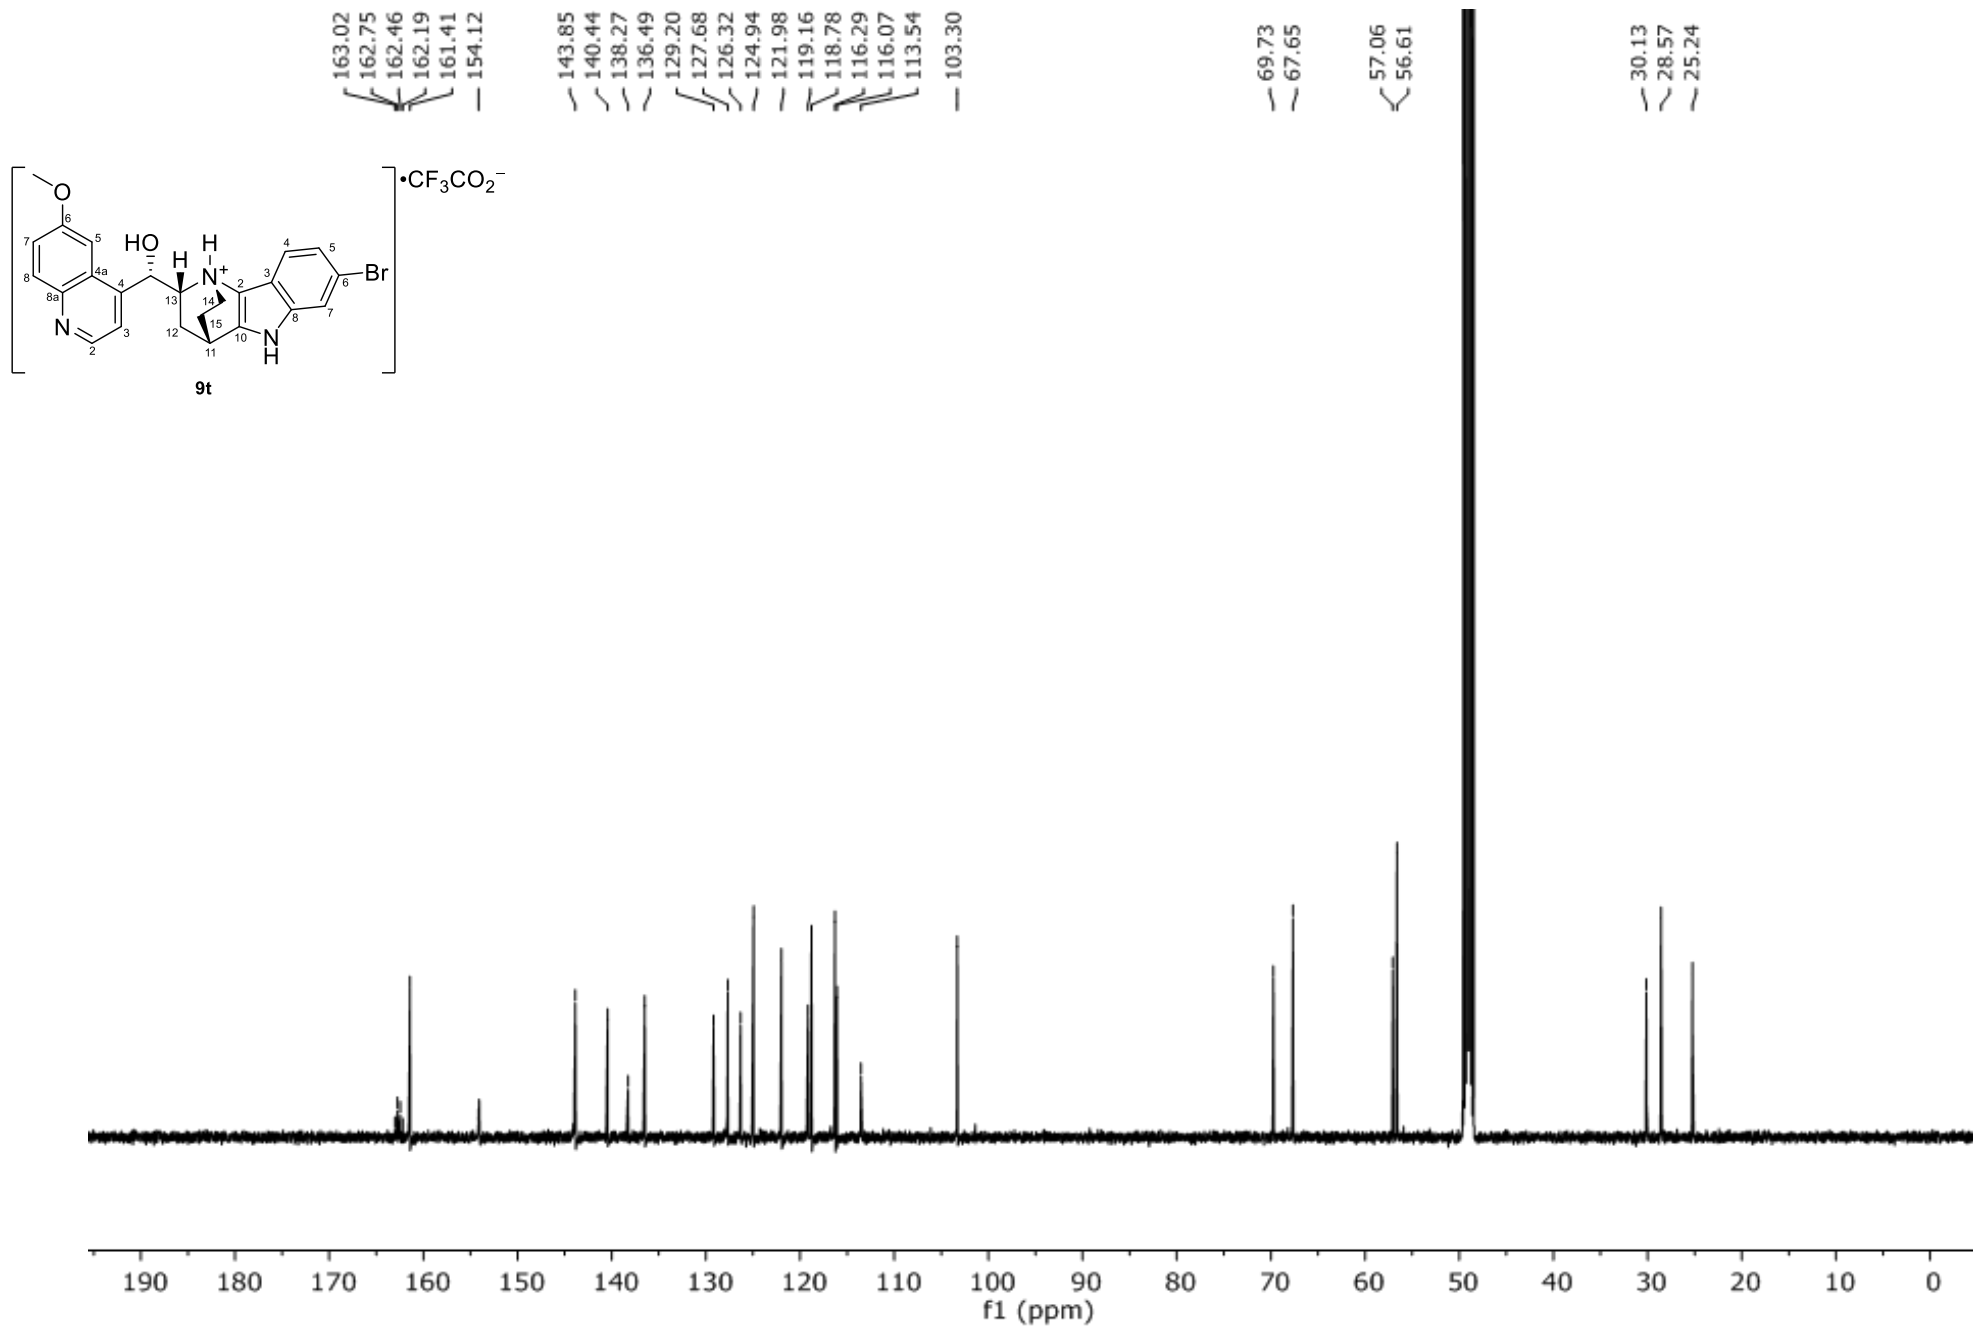

194

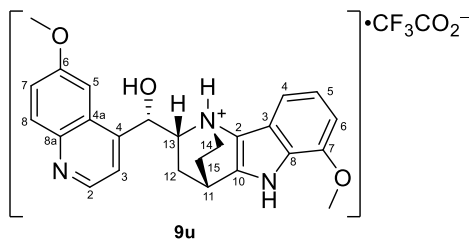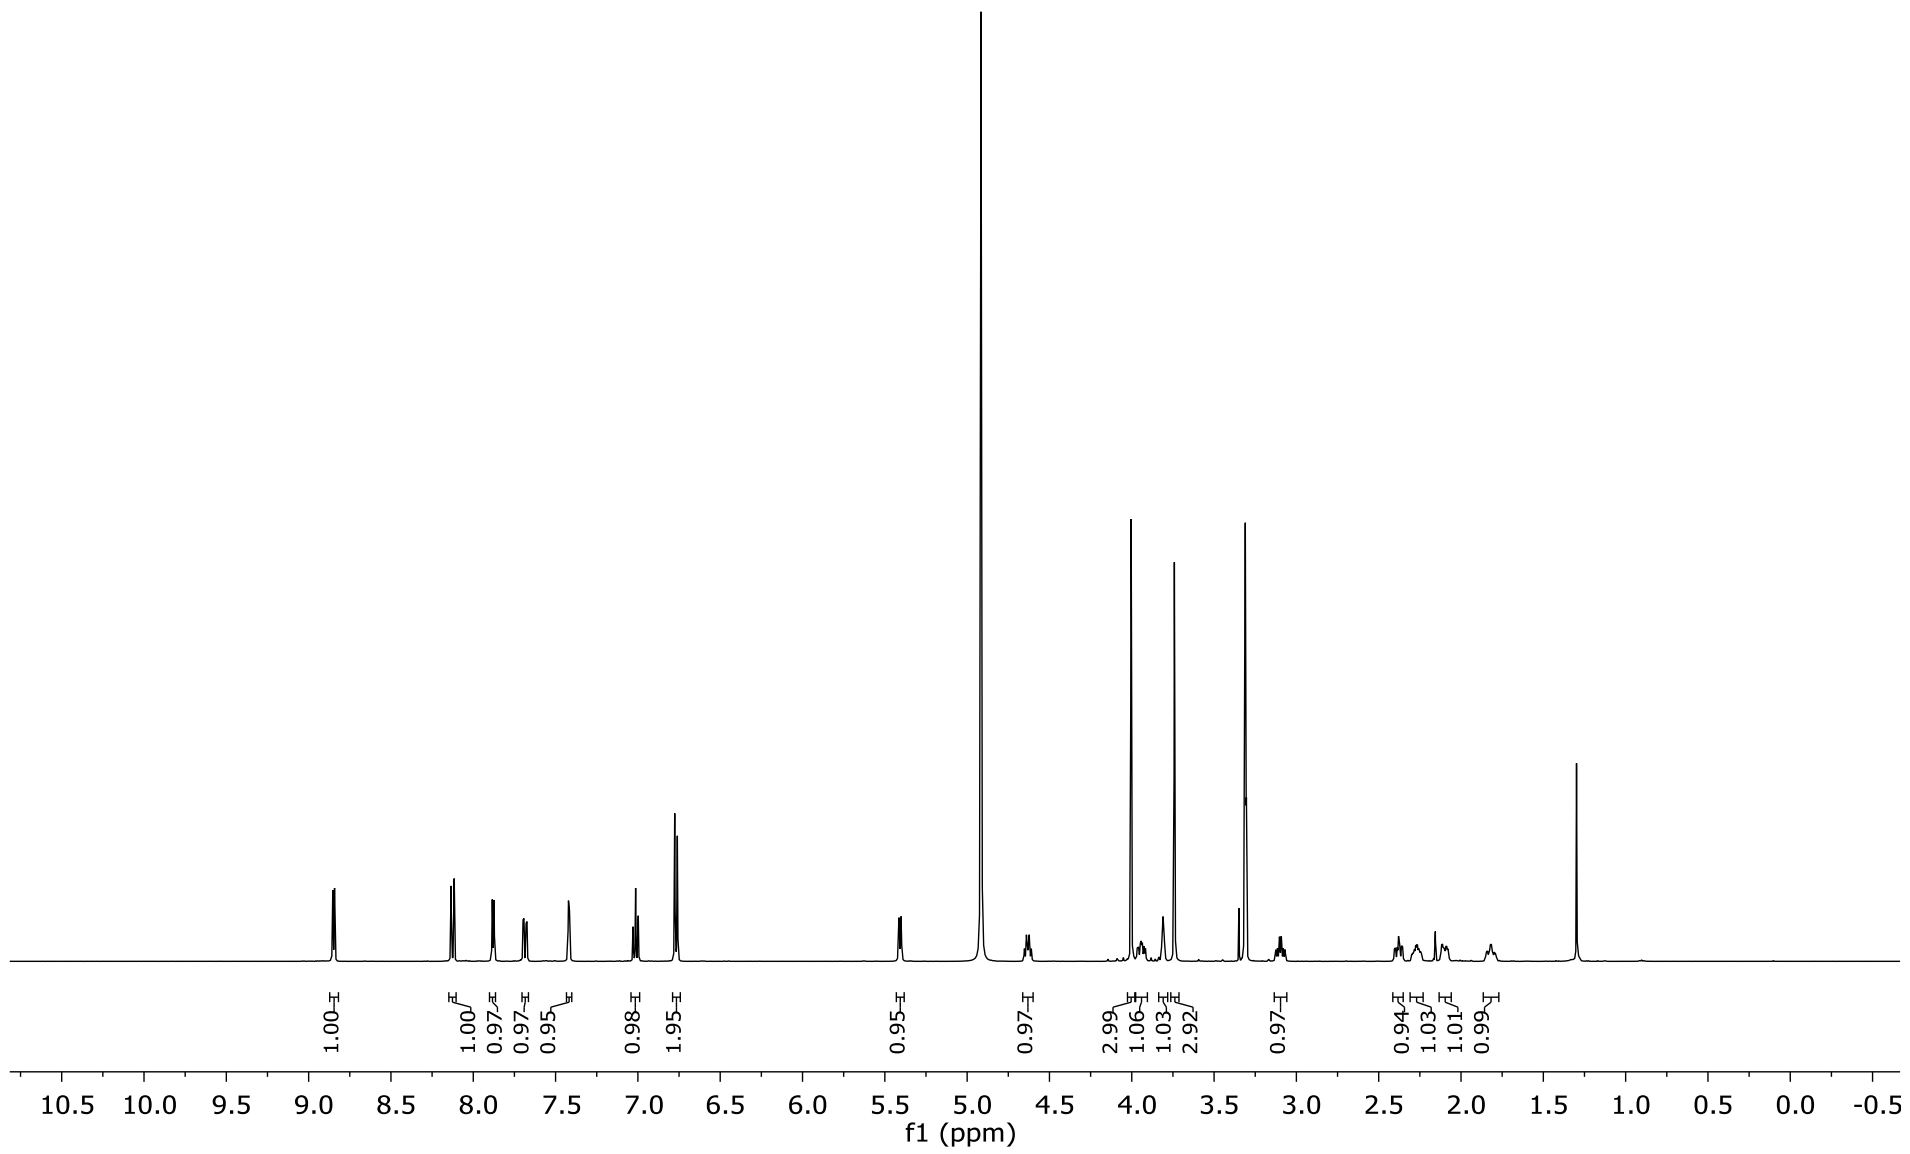

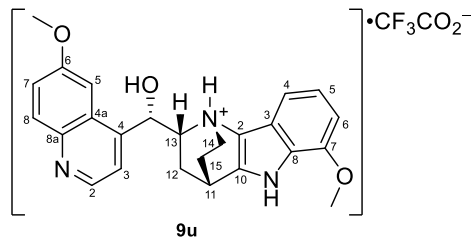

162.94  
 162.66  
 162.39  
 162.11  
 161.14  
 152.70  
 148.39  
 144.38  
 139.21  
 138.85  
 129.24  
 127.20  
 126.95  
 125.88  
 122.65  
 122.25  
 121.14  
 113.09  
 109.93  
 103.35

70.32  
 68.17

57.24  
 56.47  
 56.03

30.70  
 28.42  
 25.49

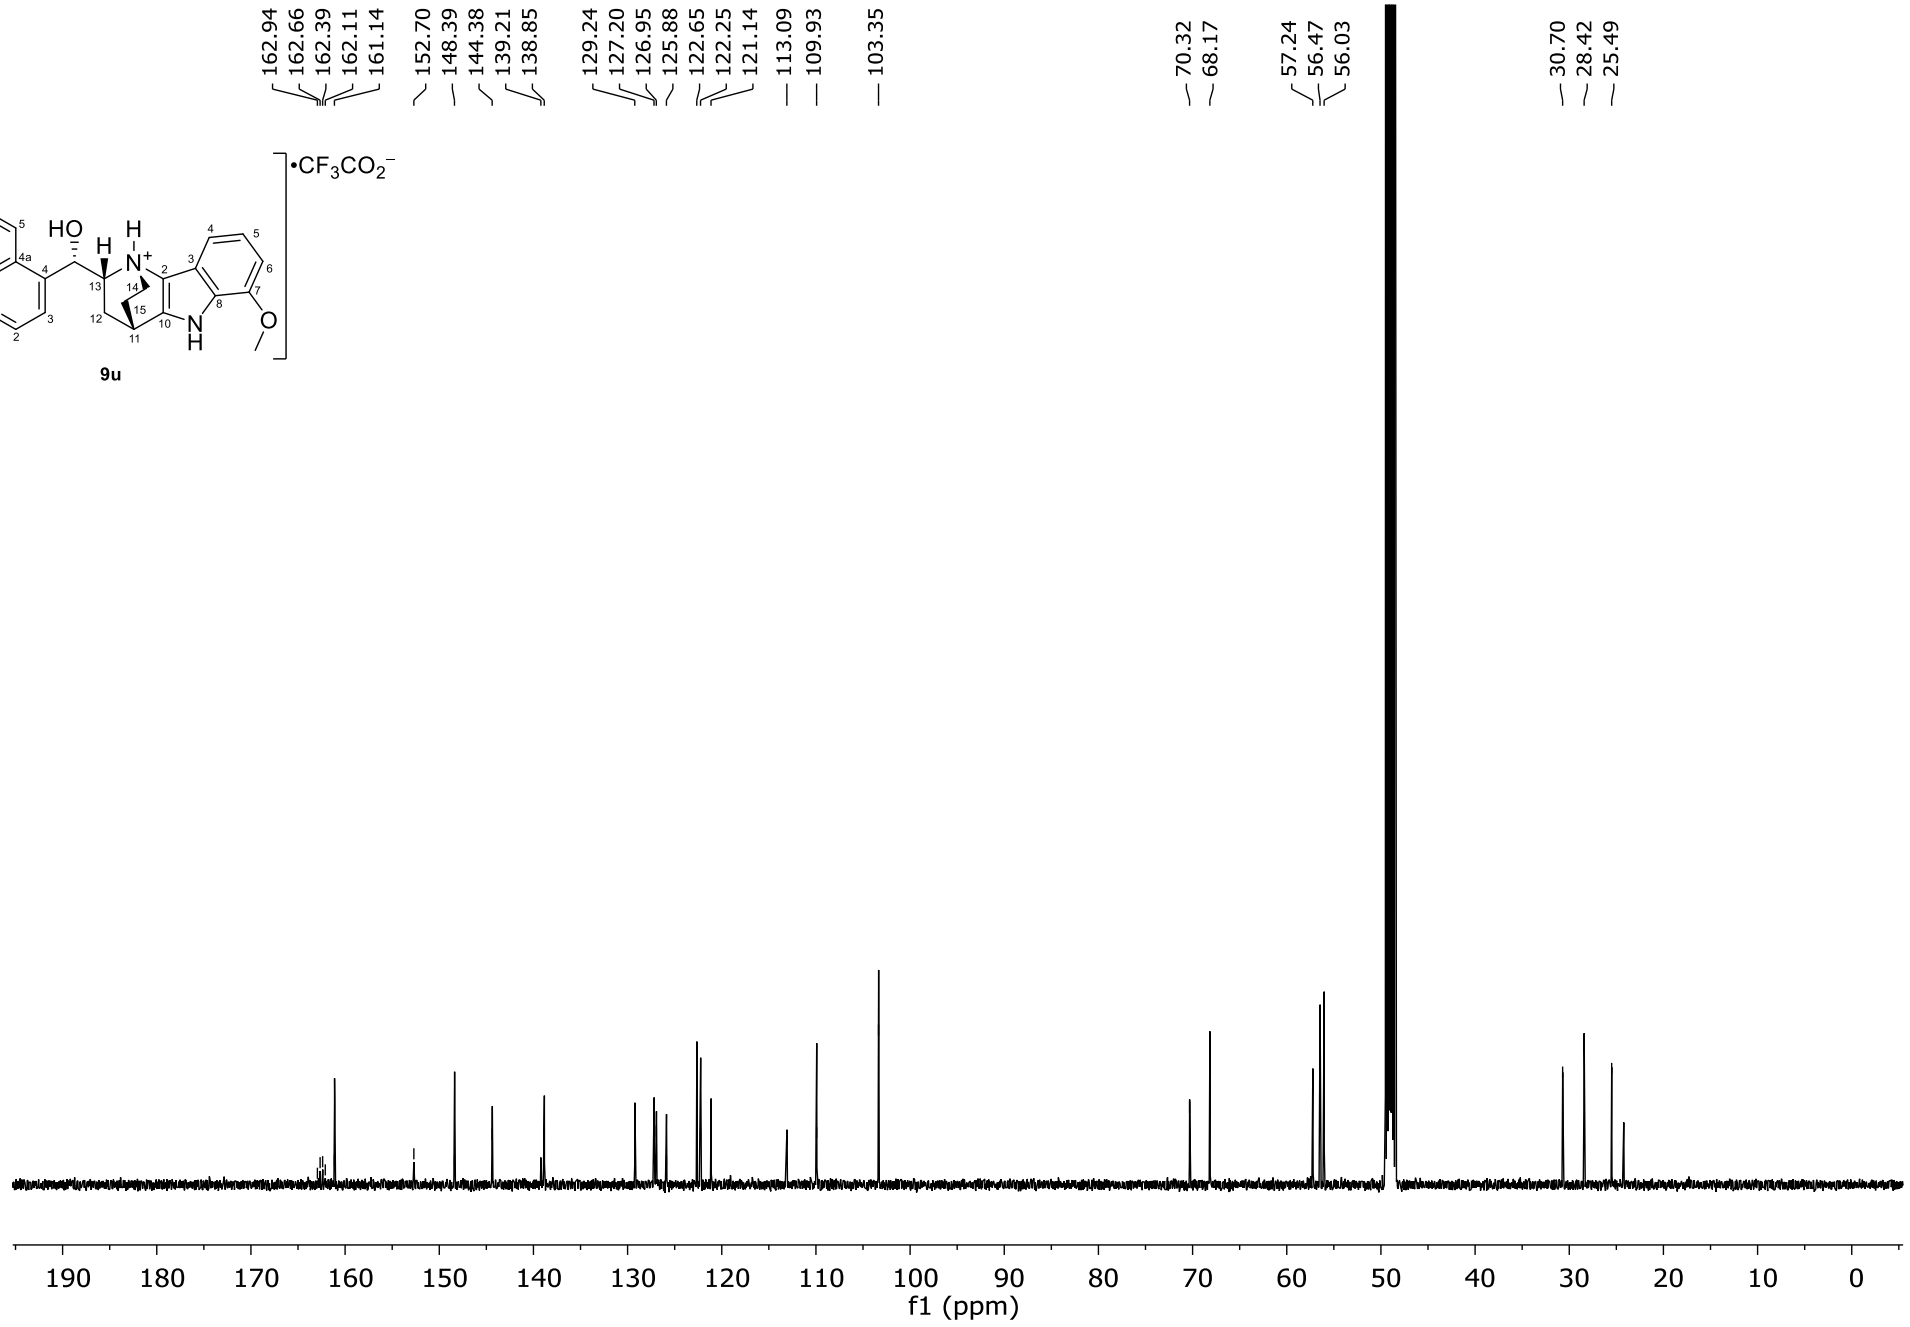

196

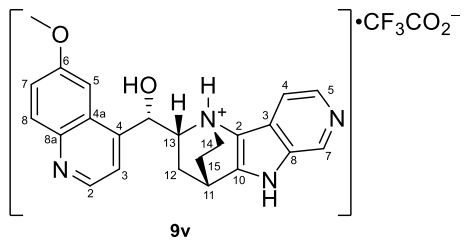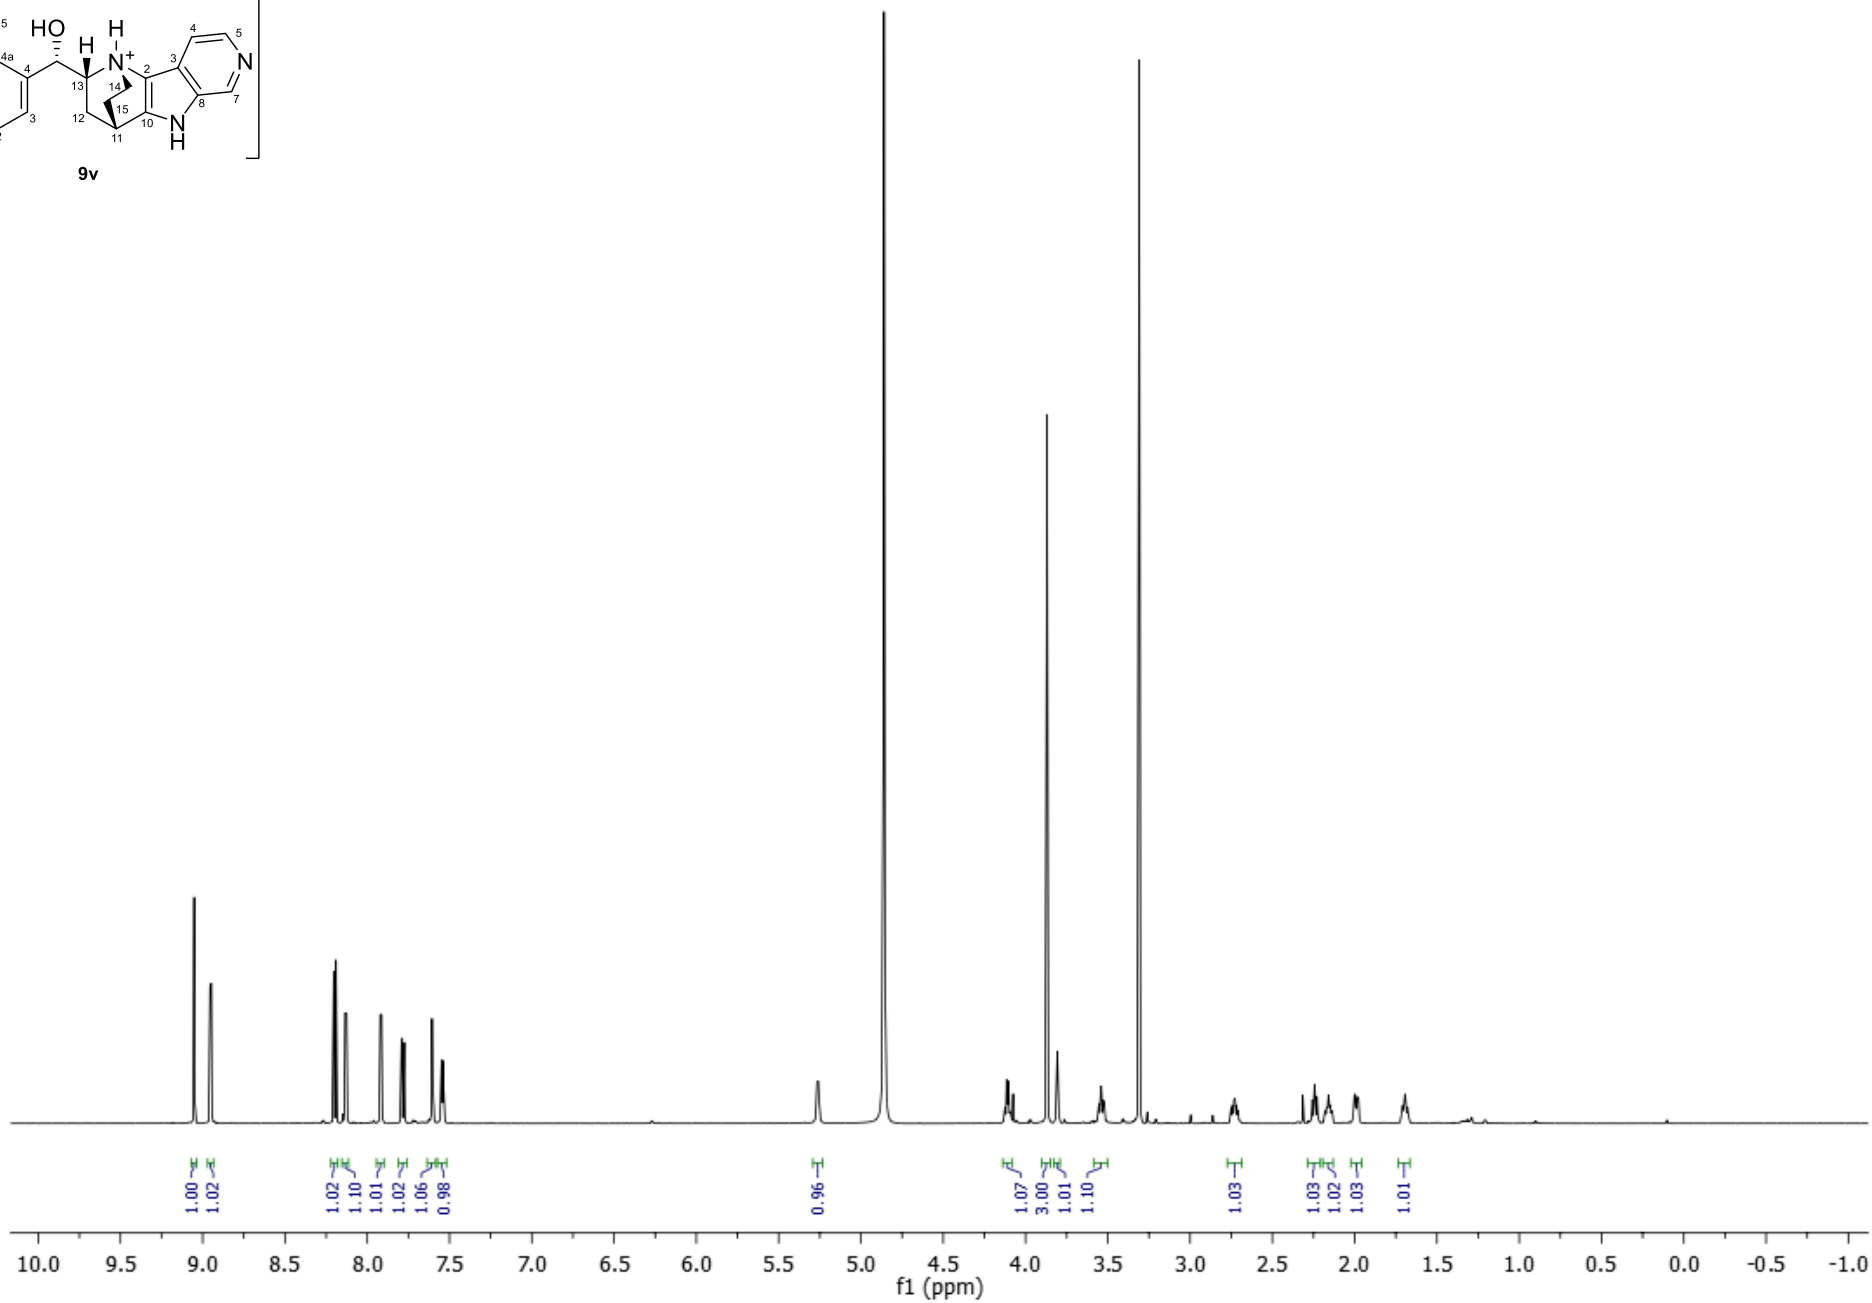

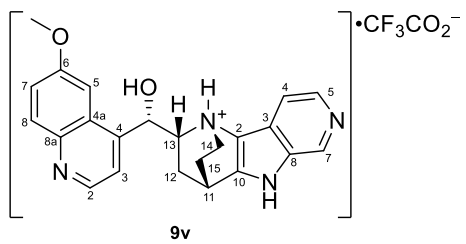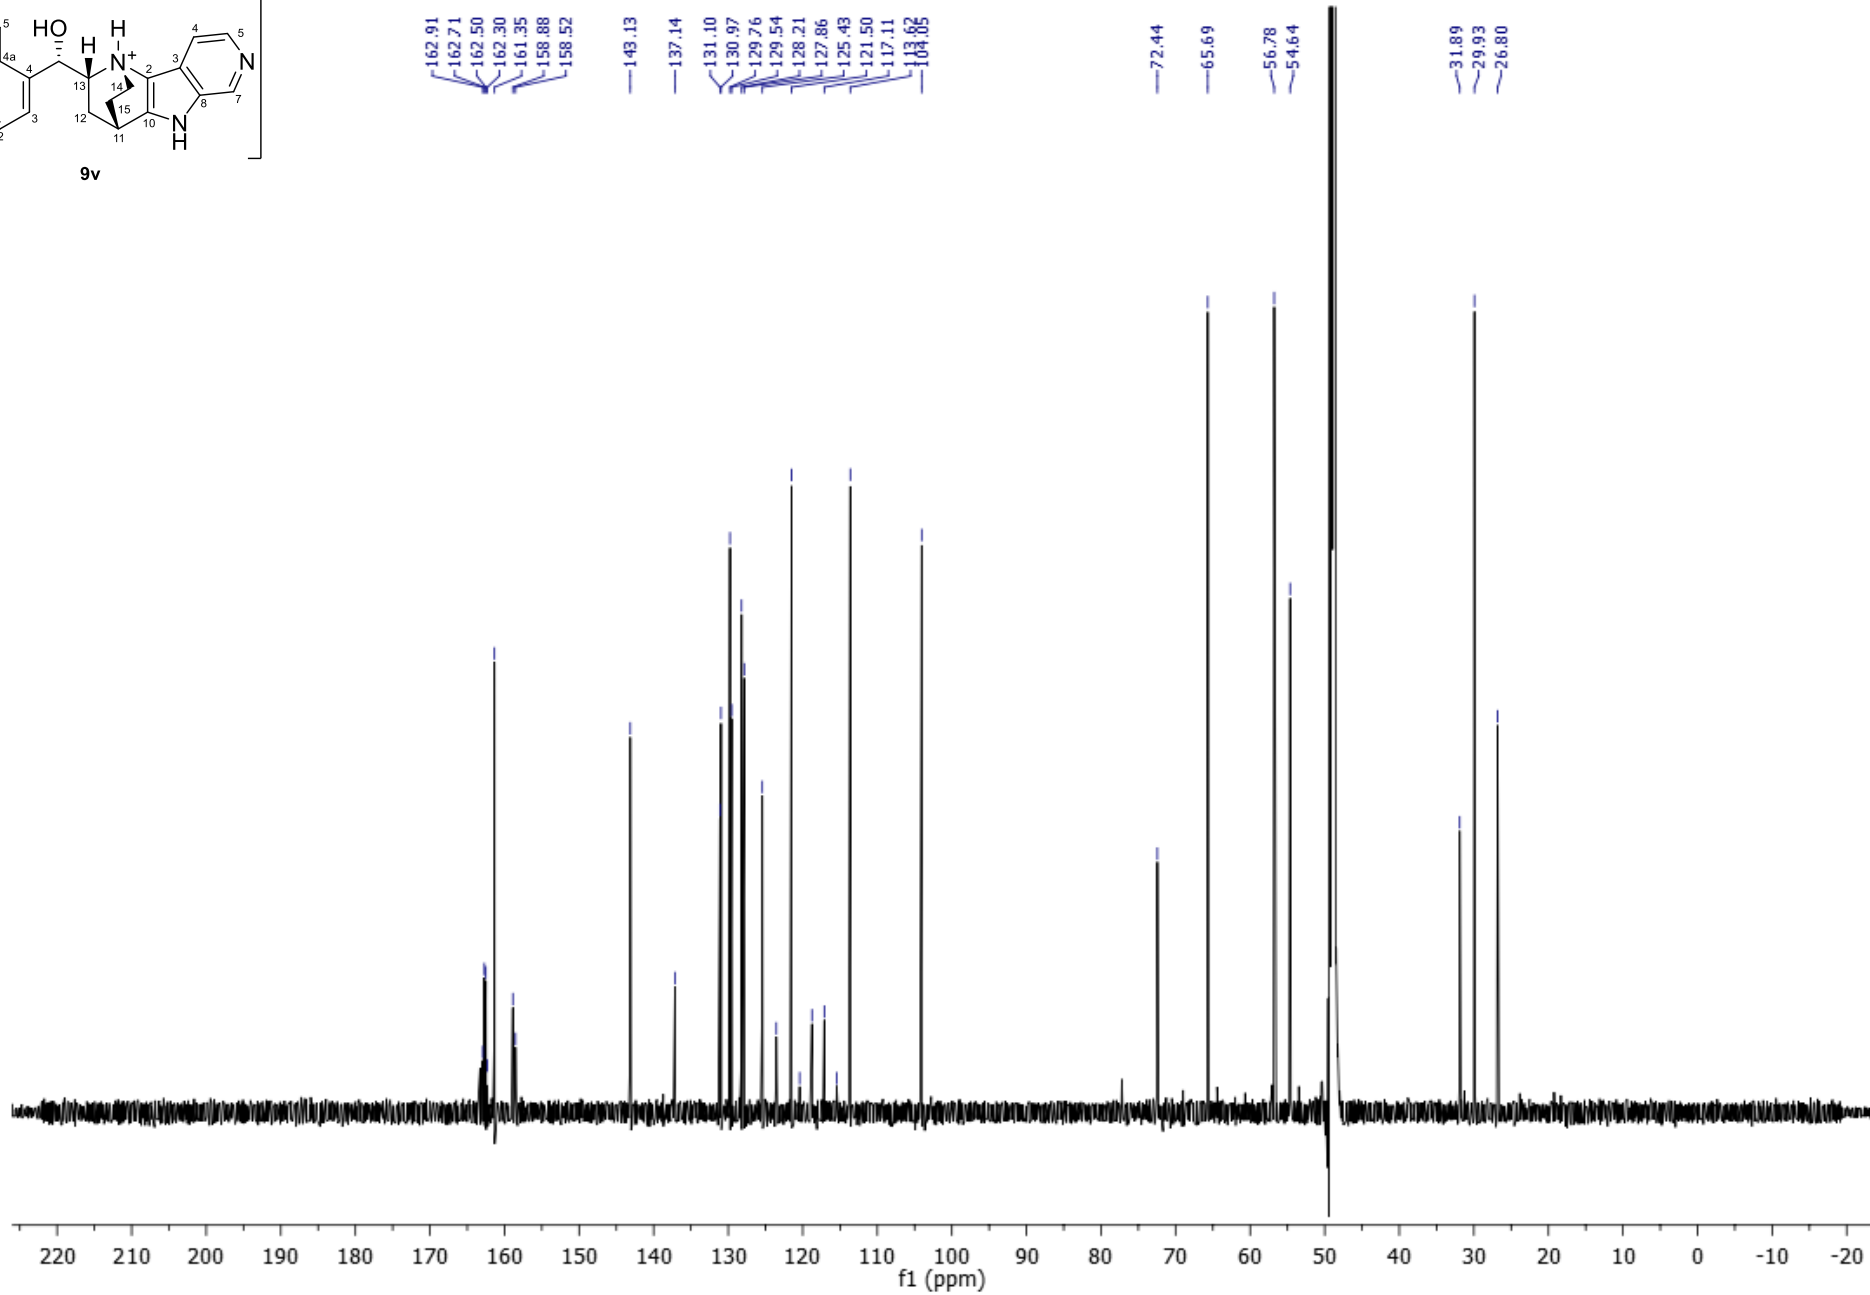

198

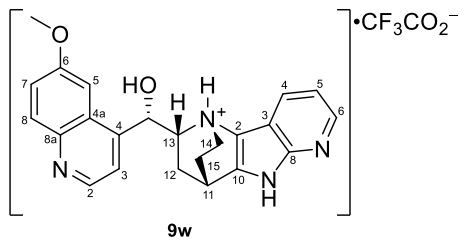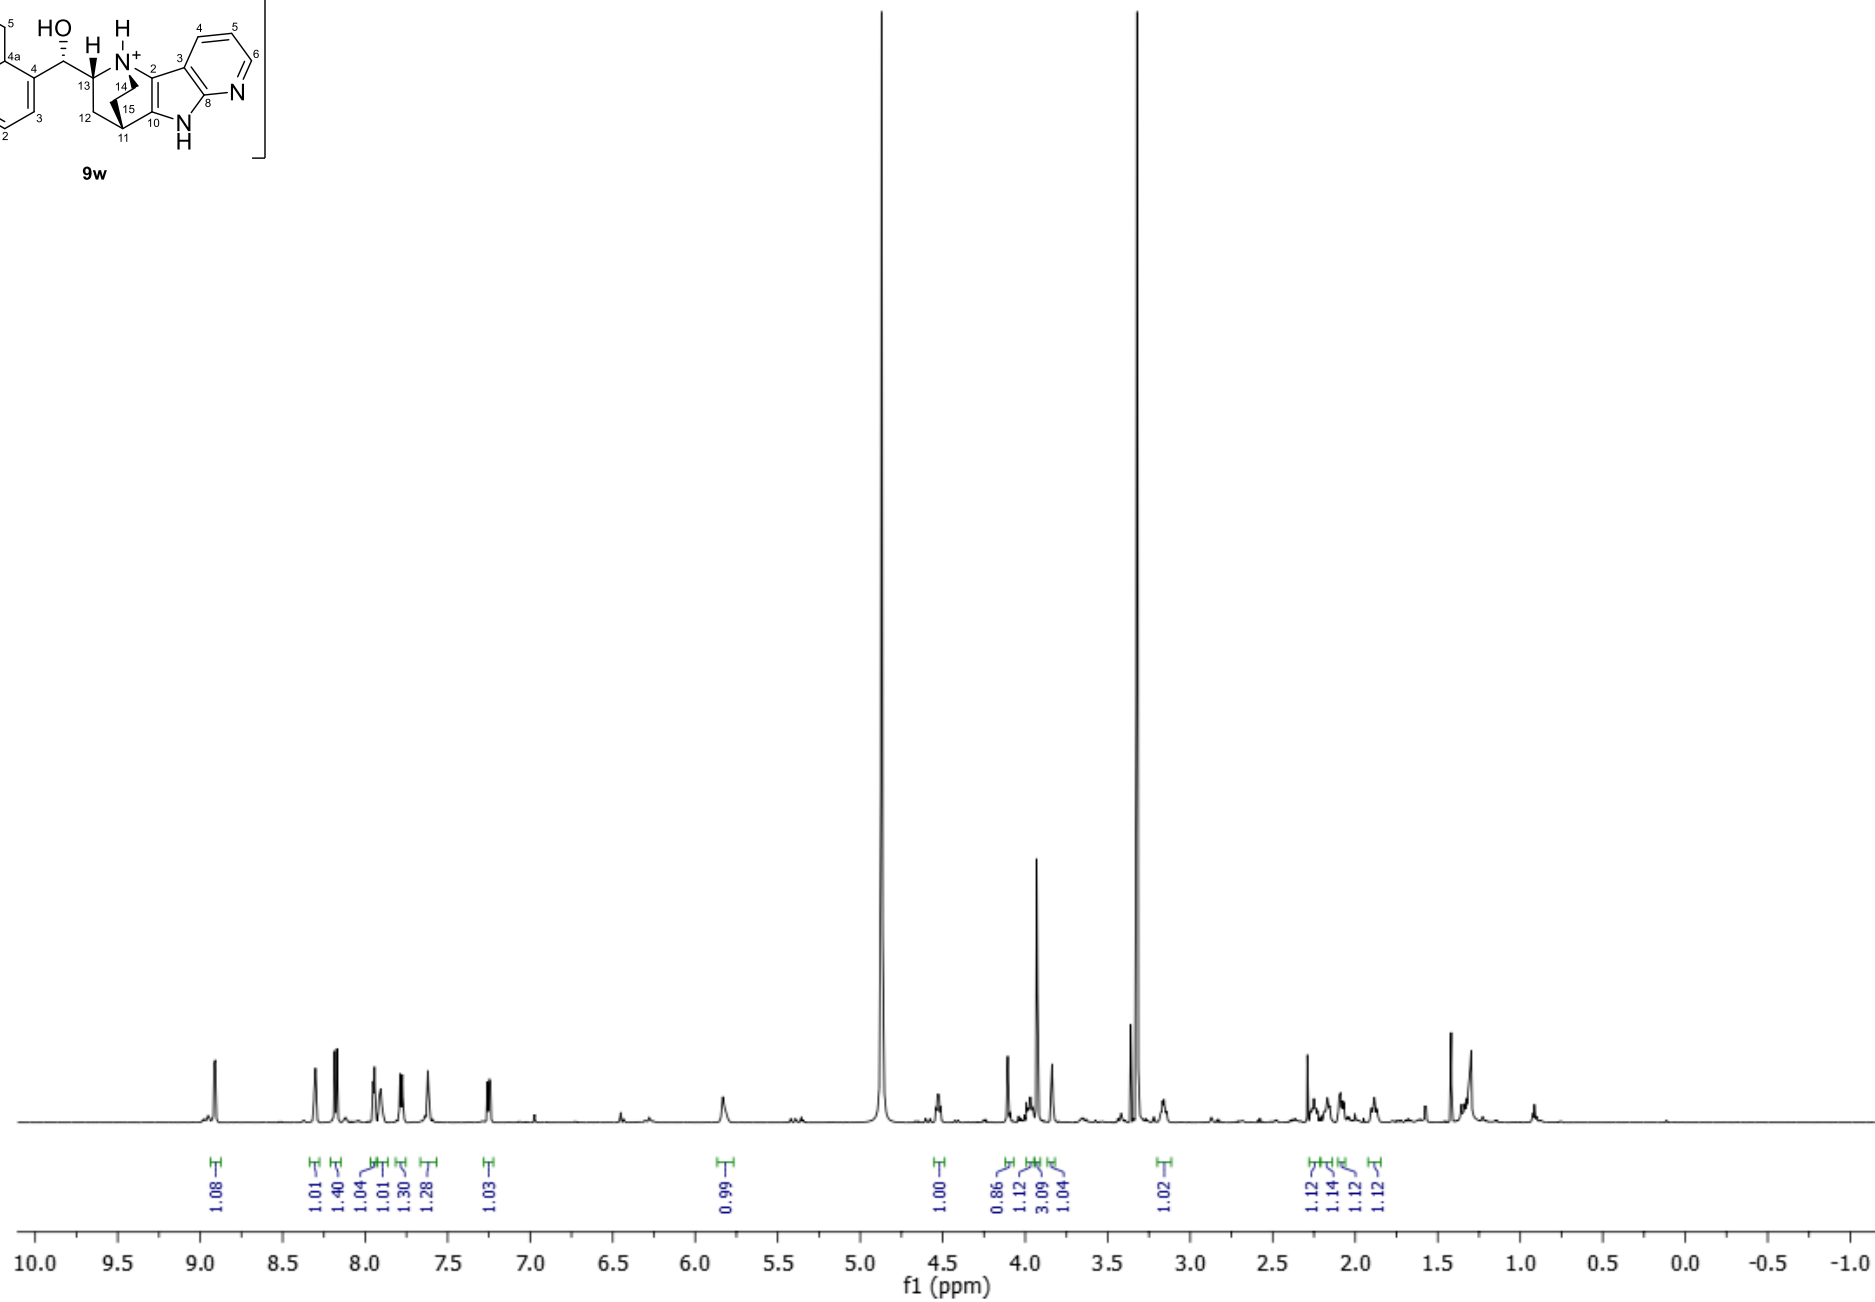

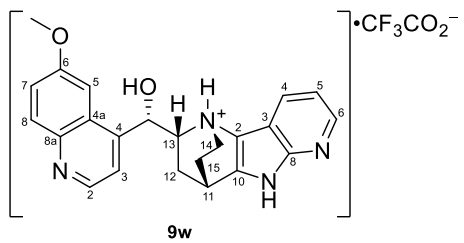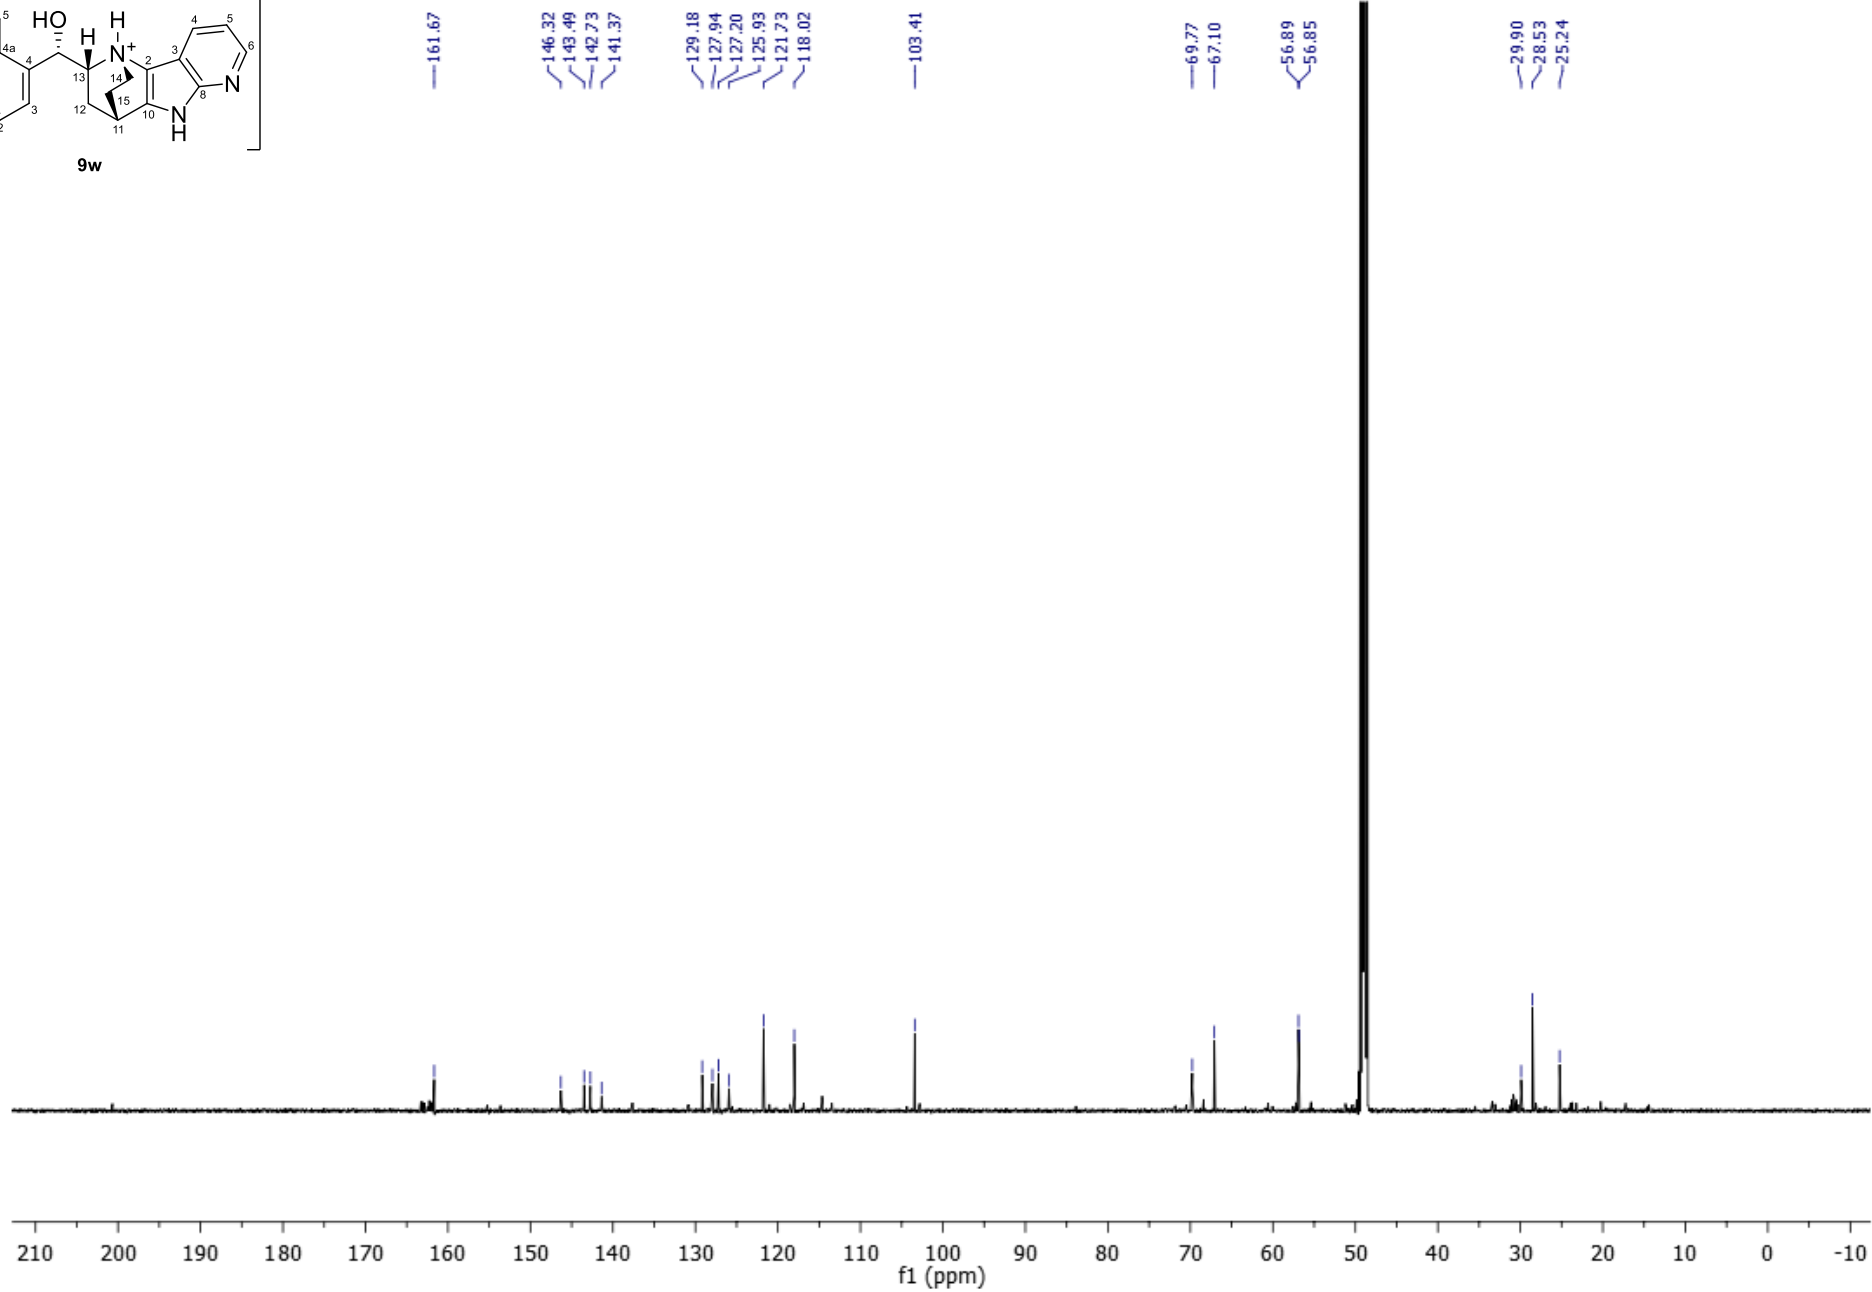



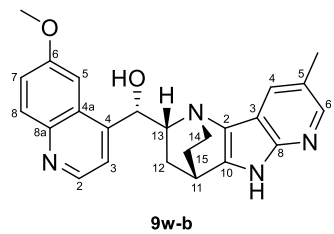

200

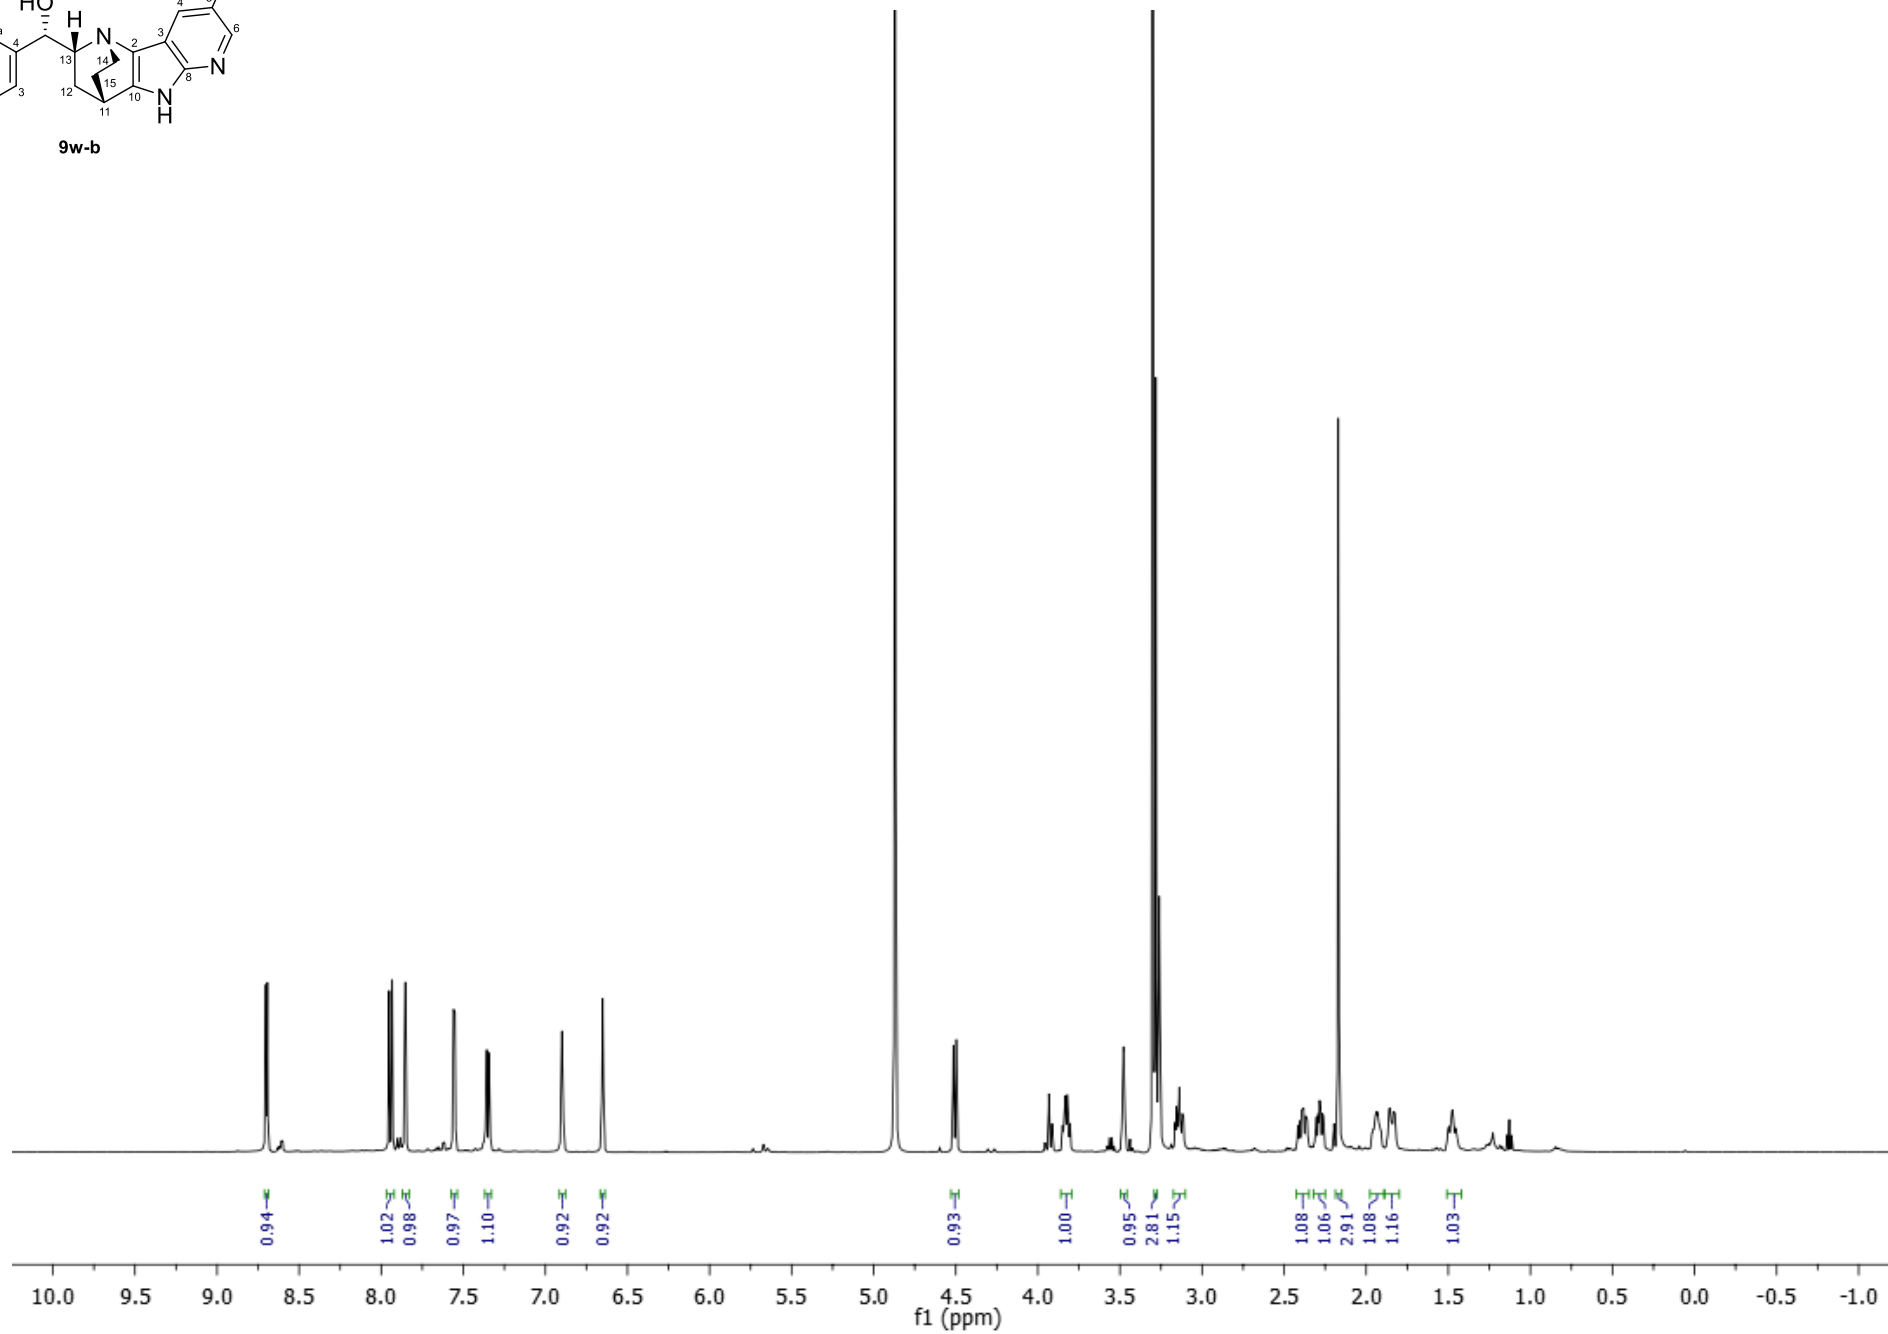

201

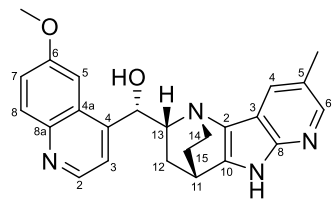

9w-b

- 158.89
- 150.58
- 148.37
- 145.87
- 145.17
- 144.93
- 141.78
- 131.10
- 129.07
- 126.69
- 125.96
- 123.55
- 121.07
- 120.66
- 117.29
- 102.97
- 73.03
- 66.65
- 55.41
- 54.07
- 35.47
- 28.97
- 18.44

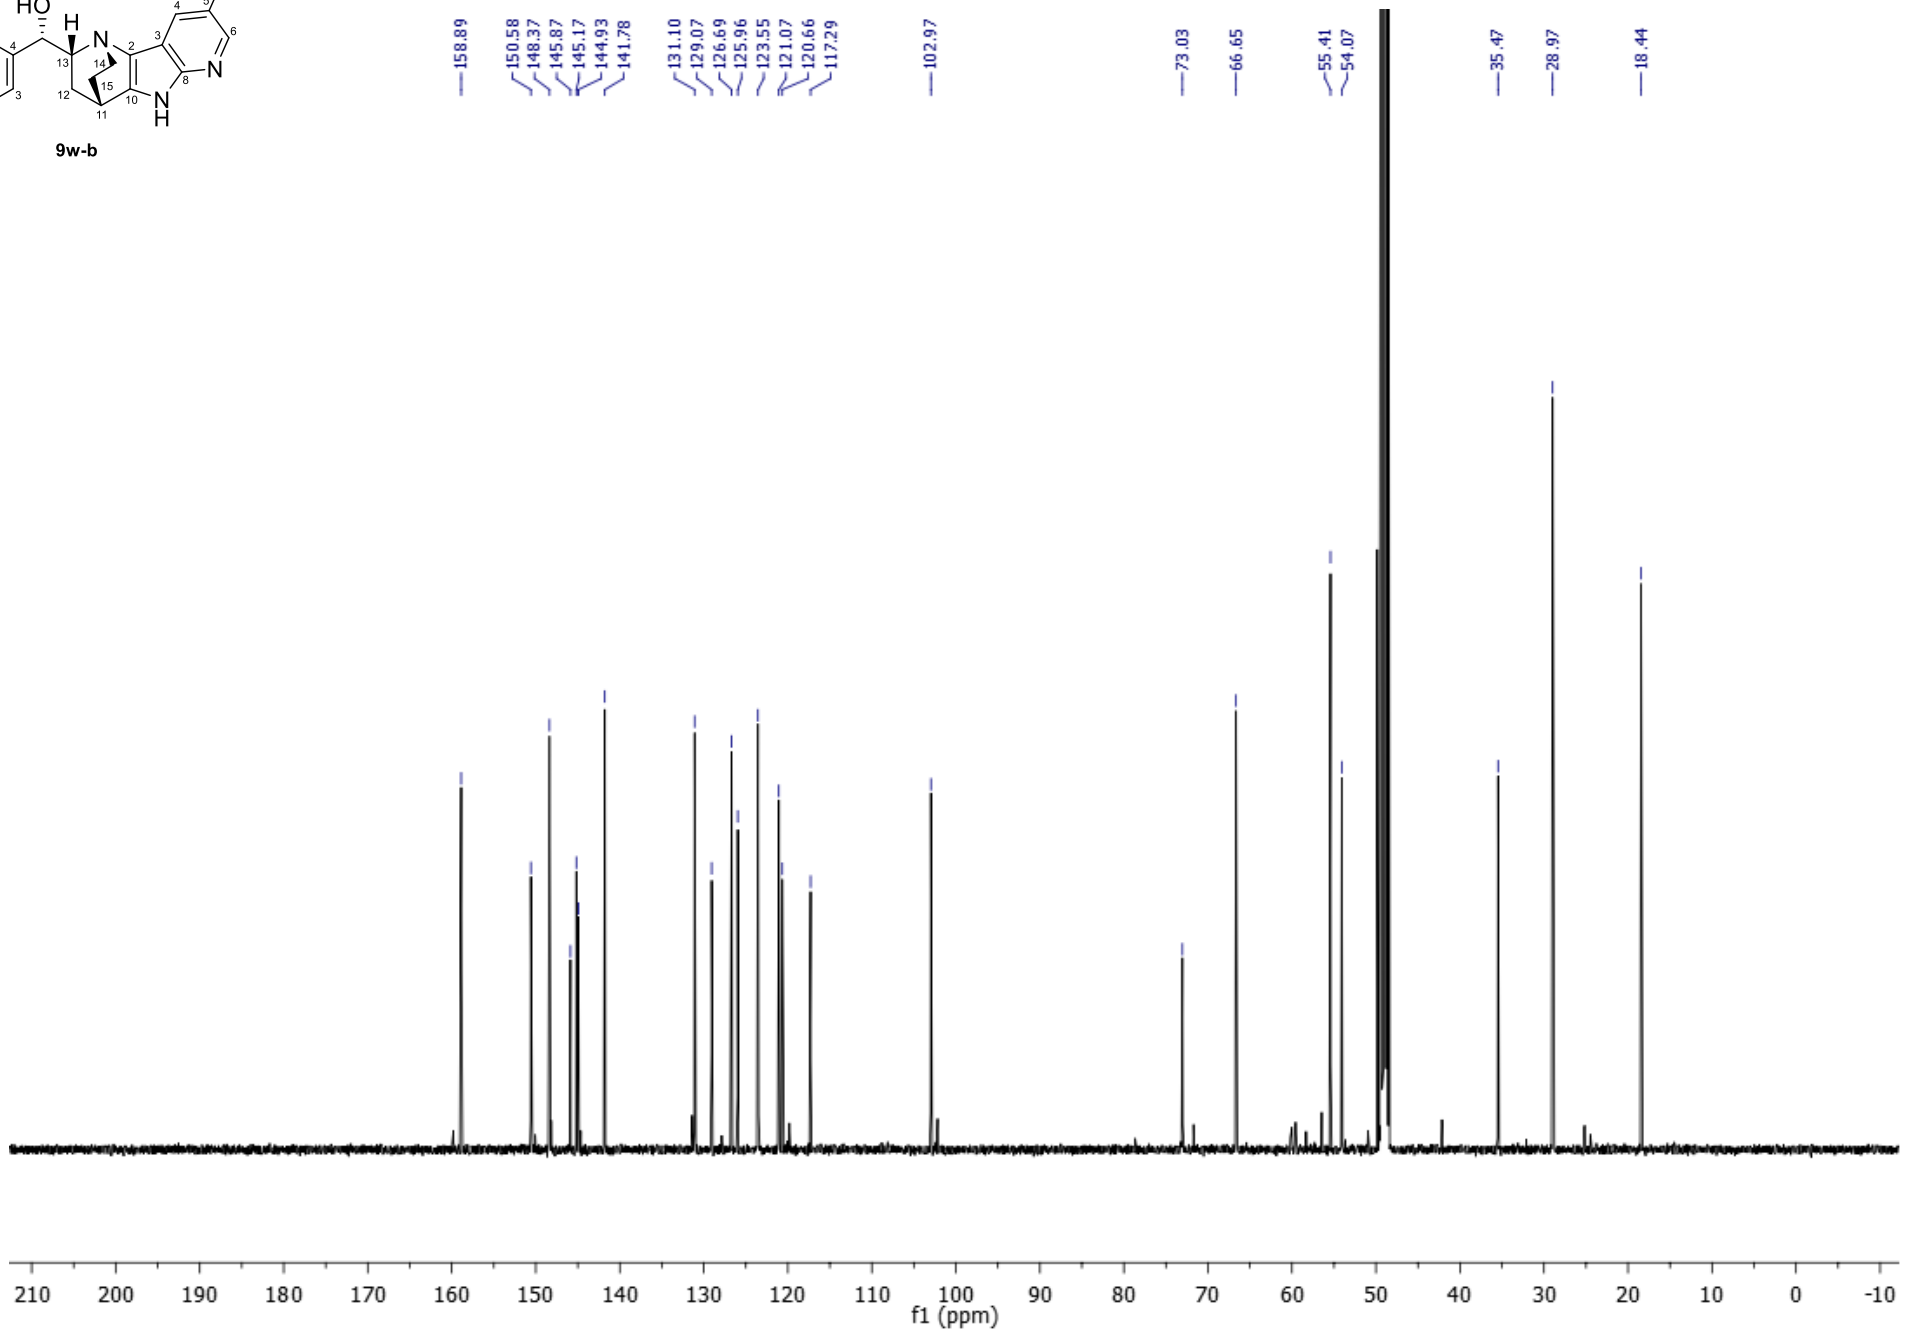

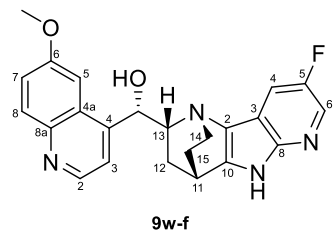

202

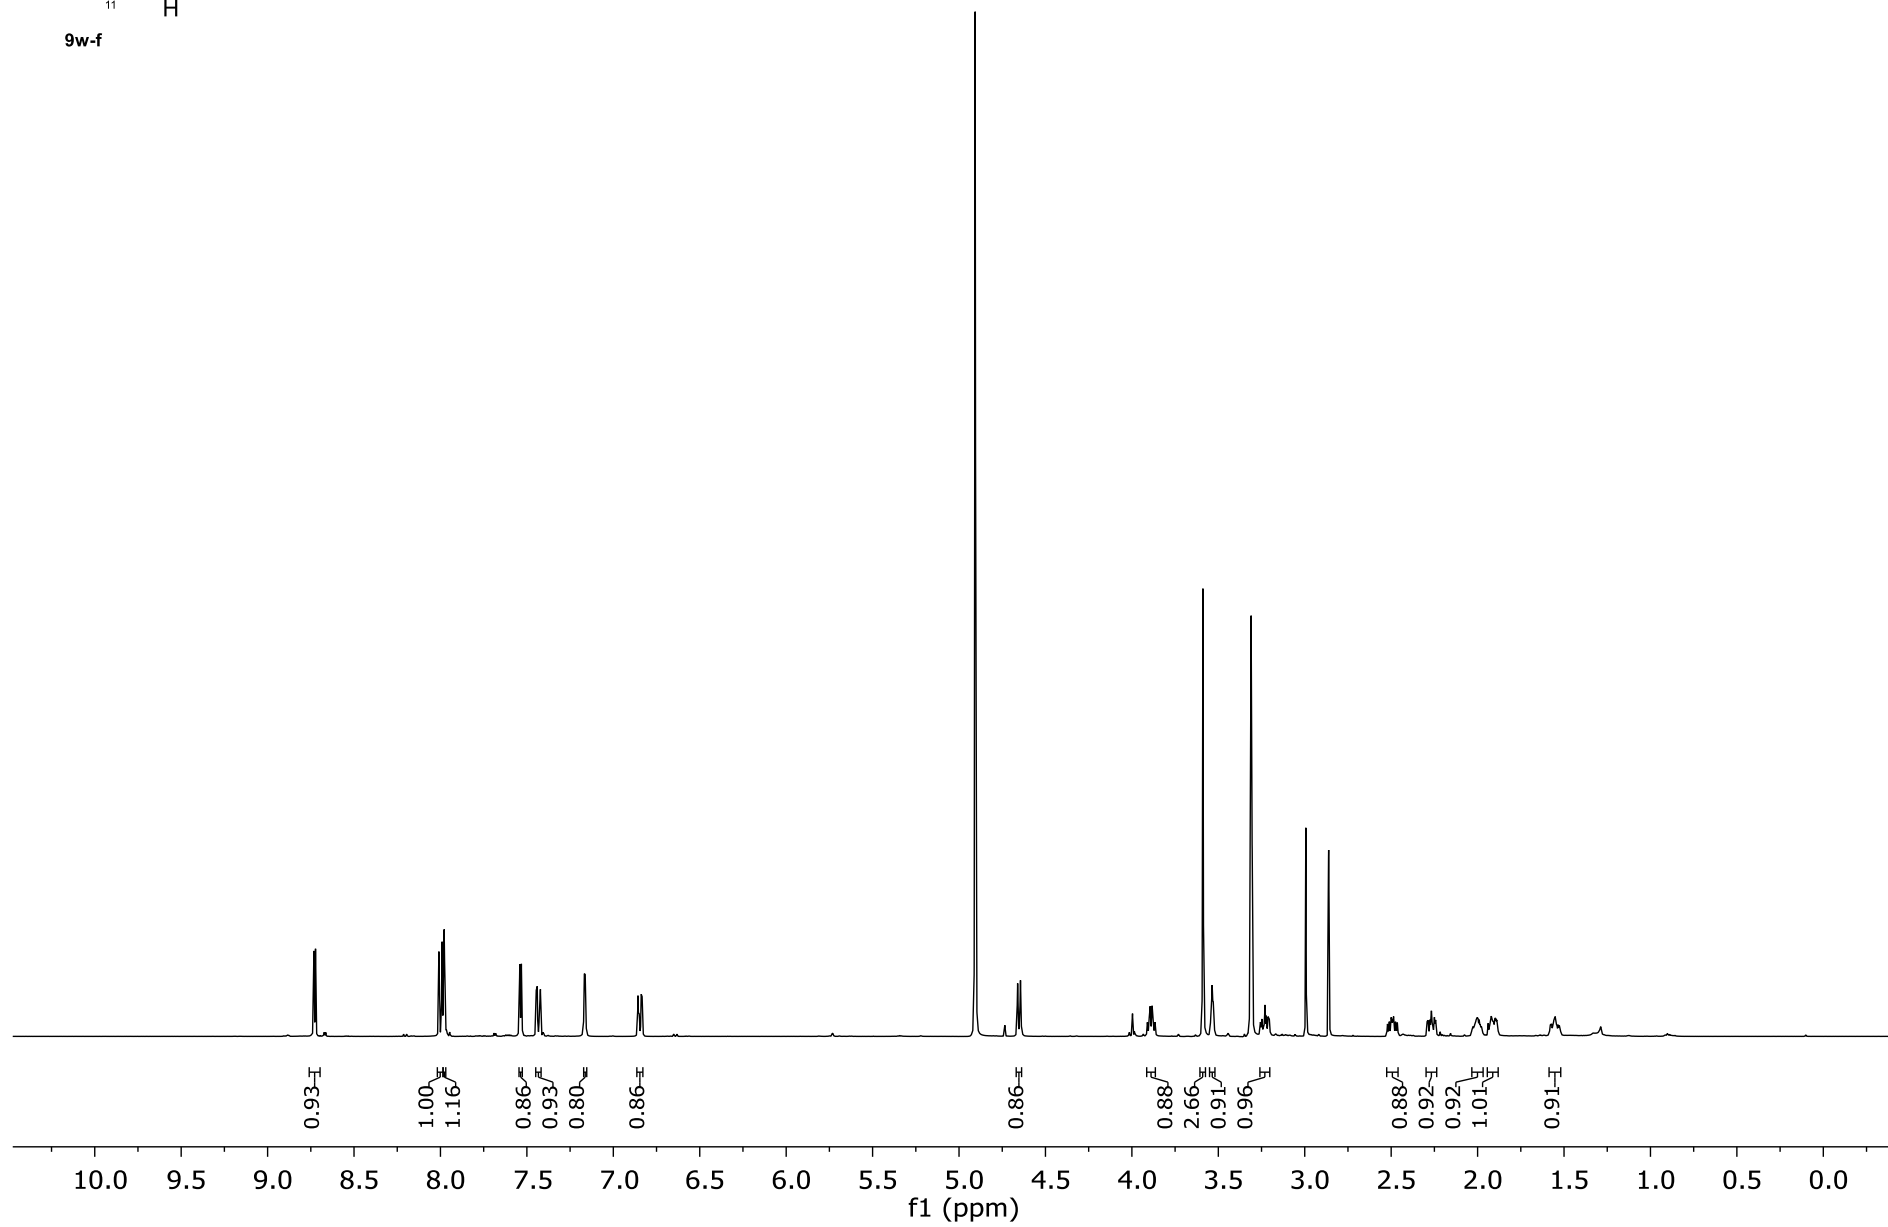

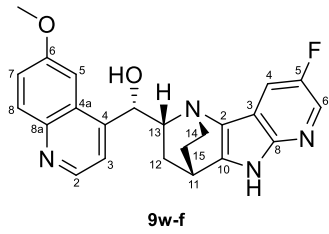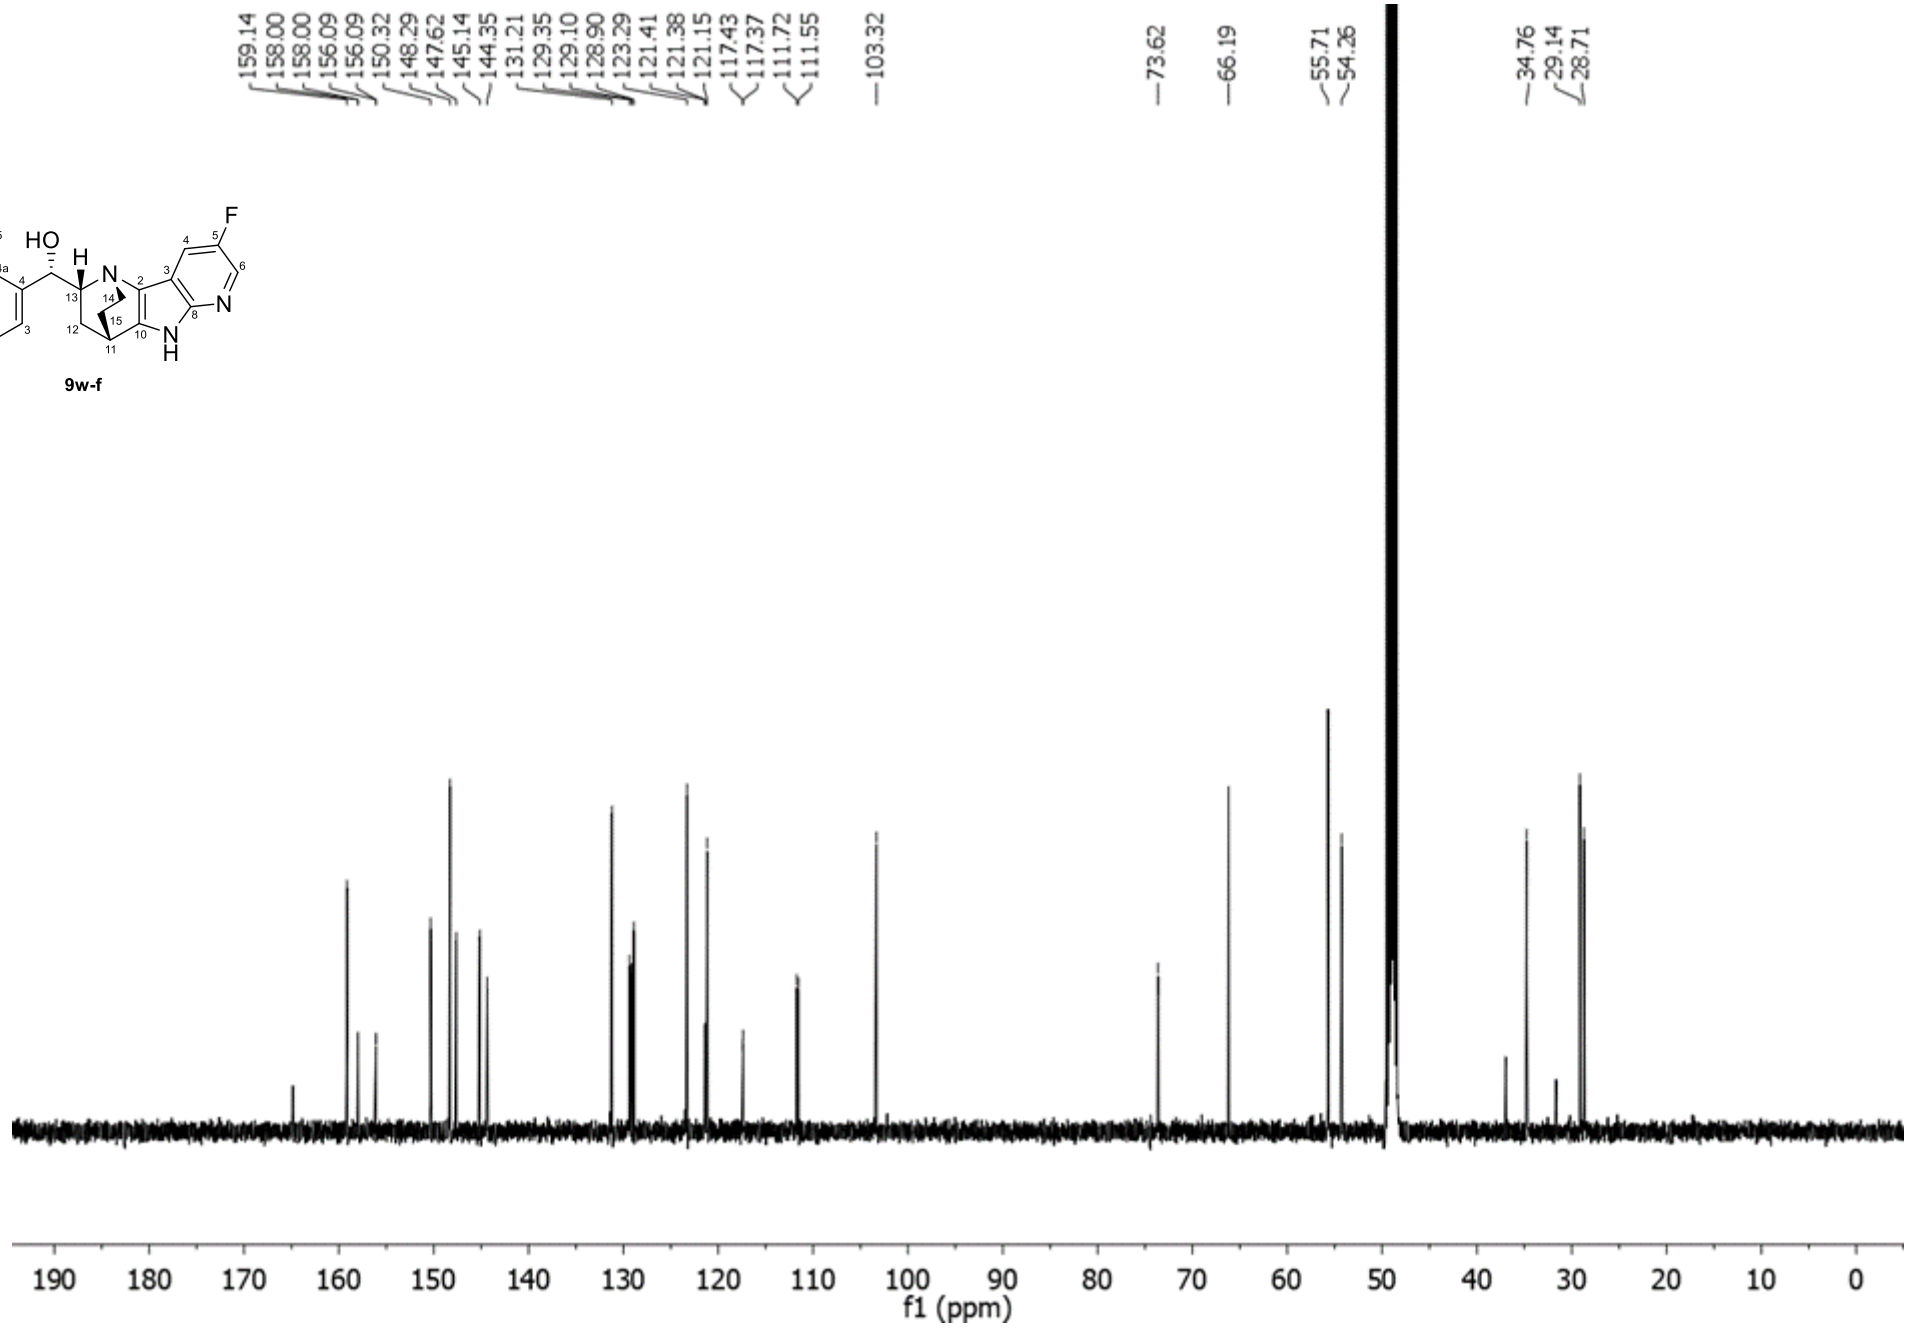

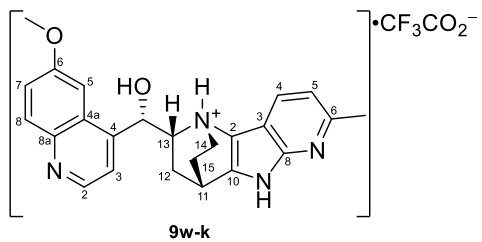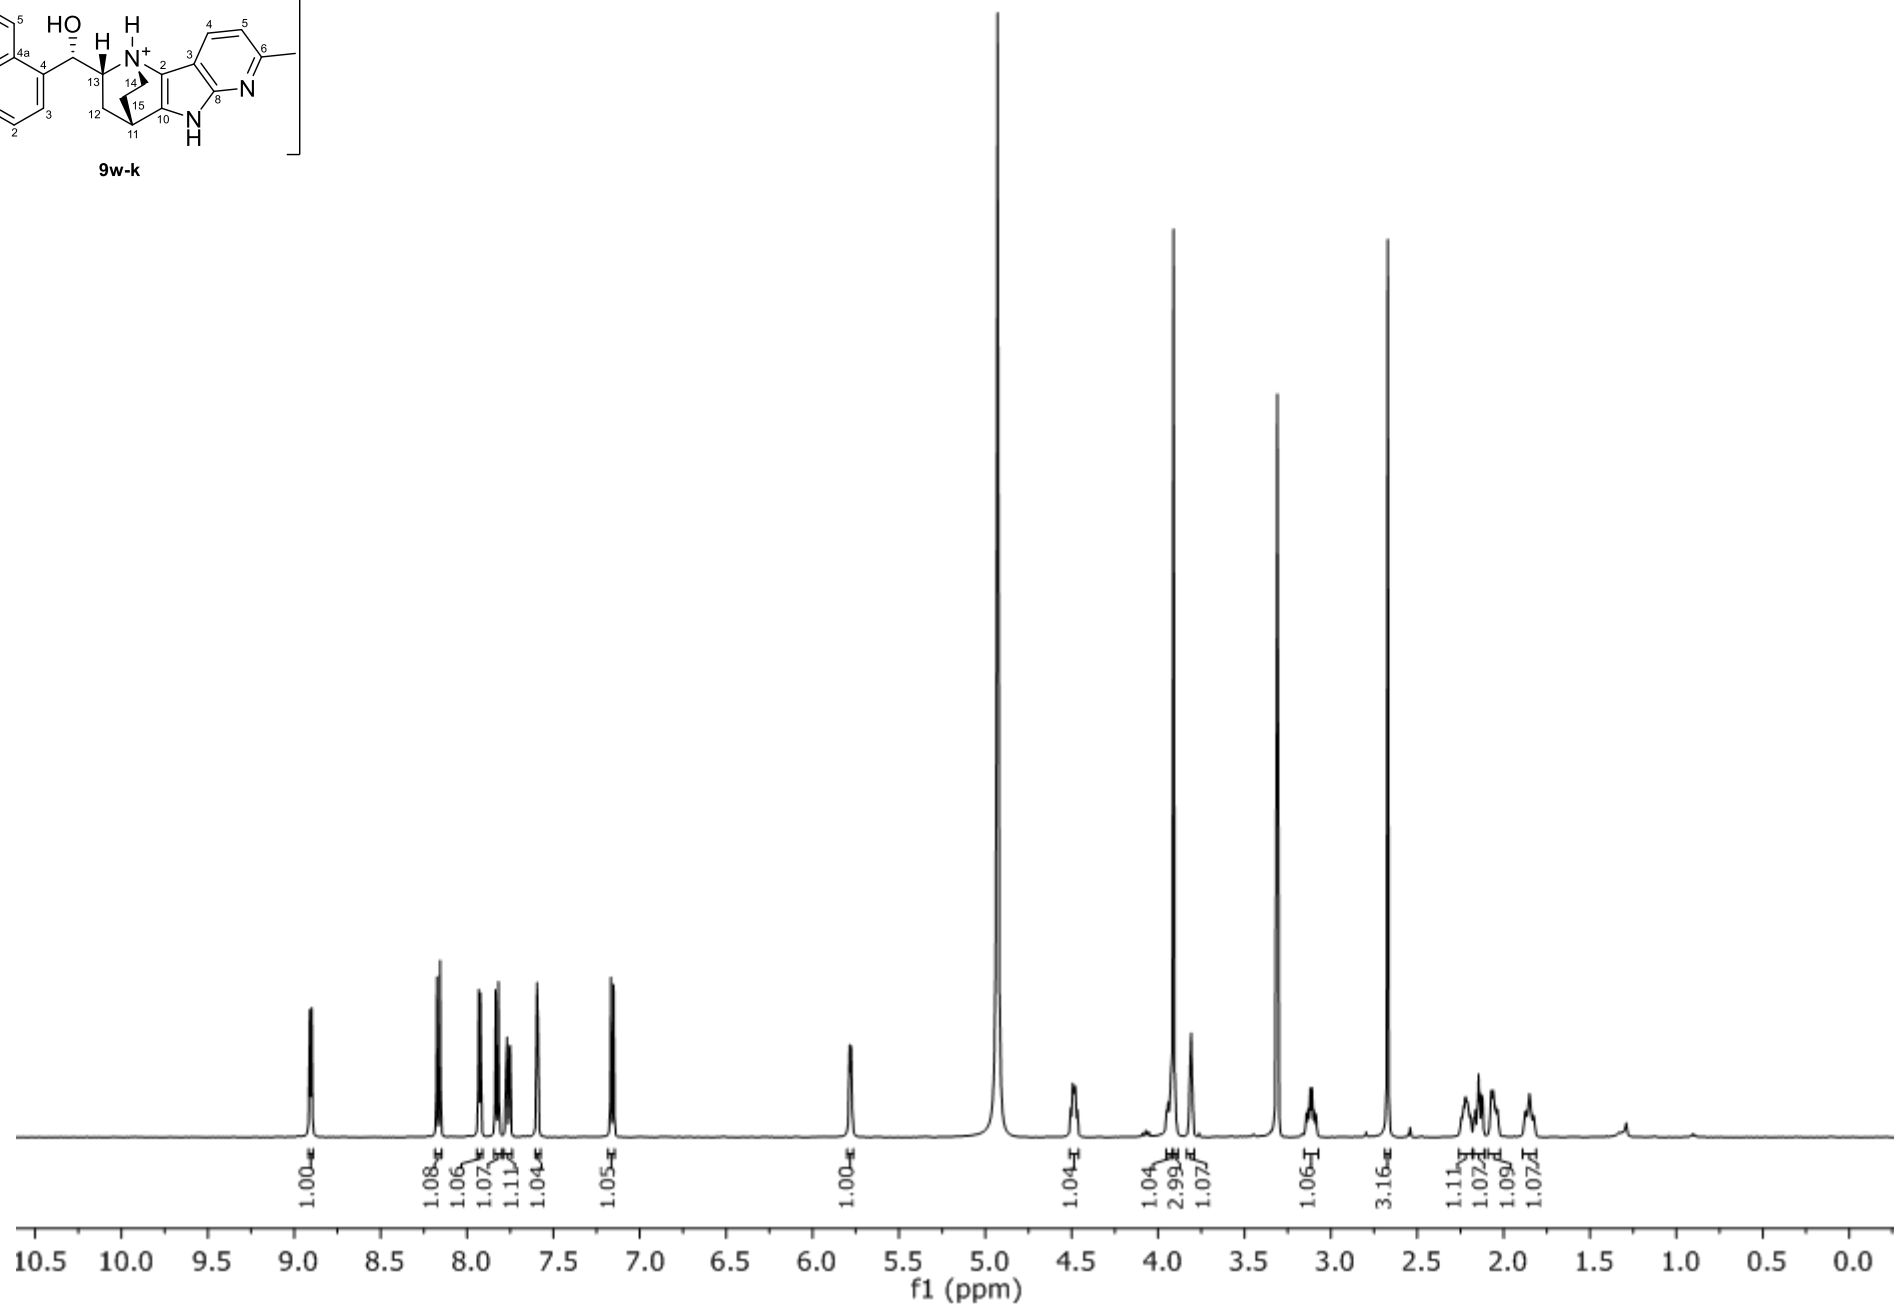

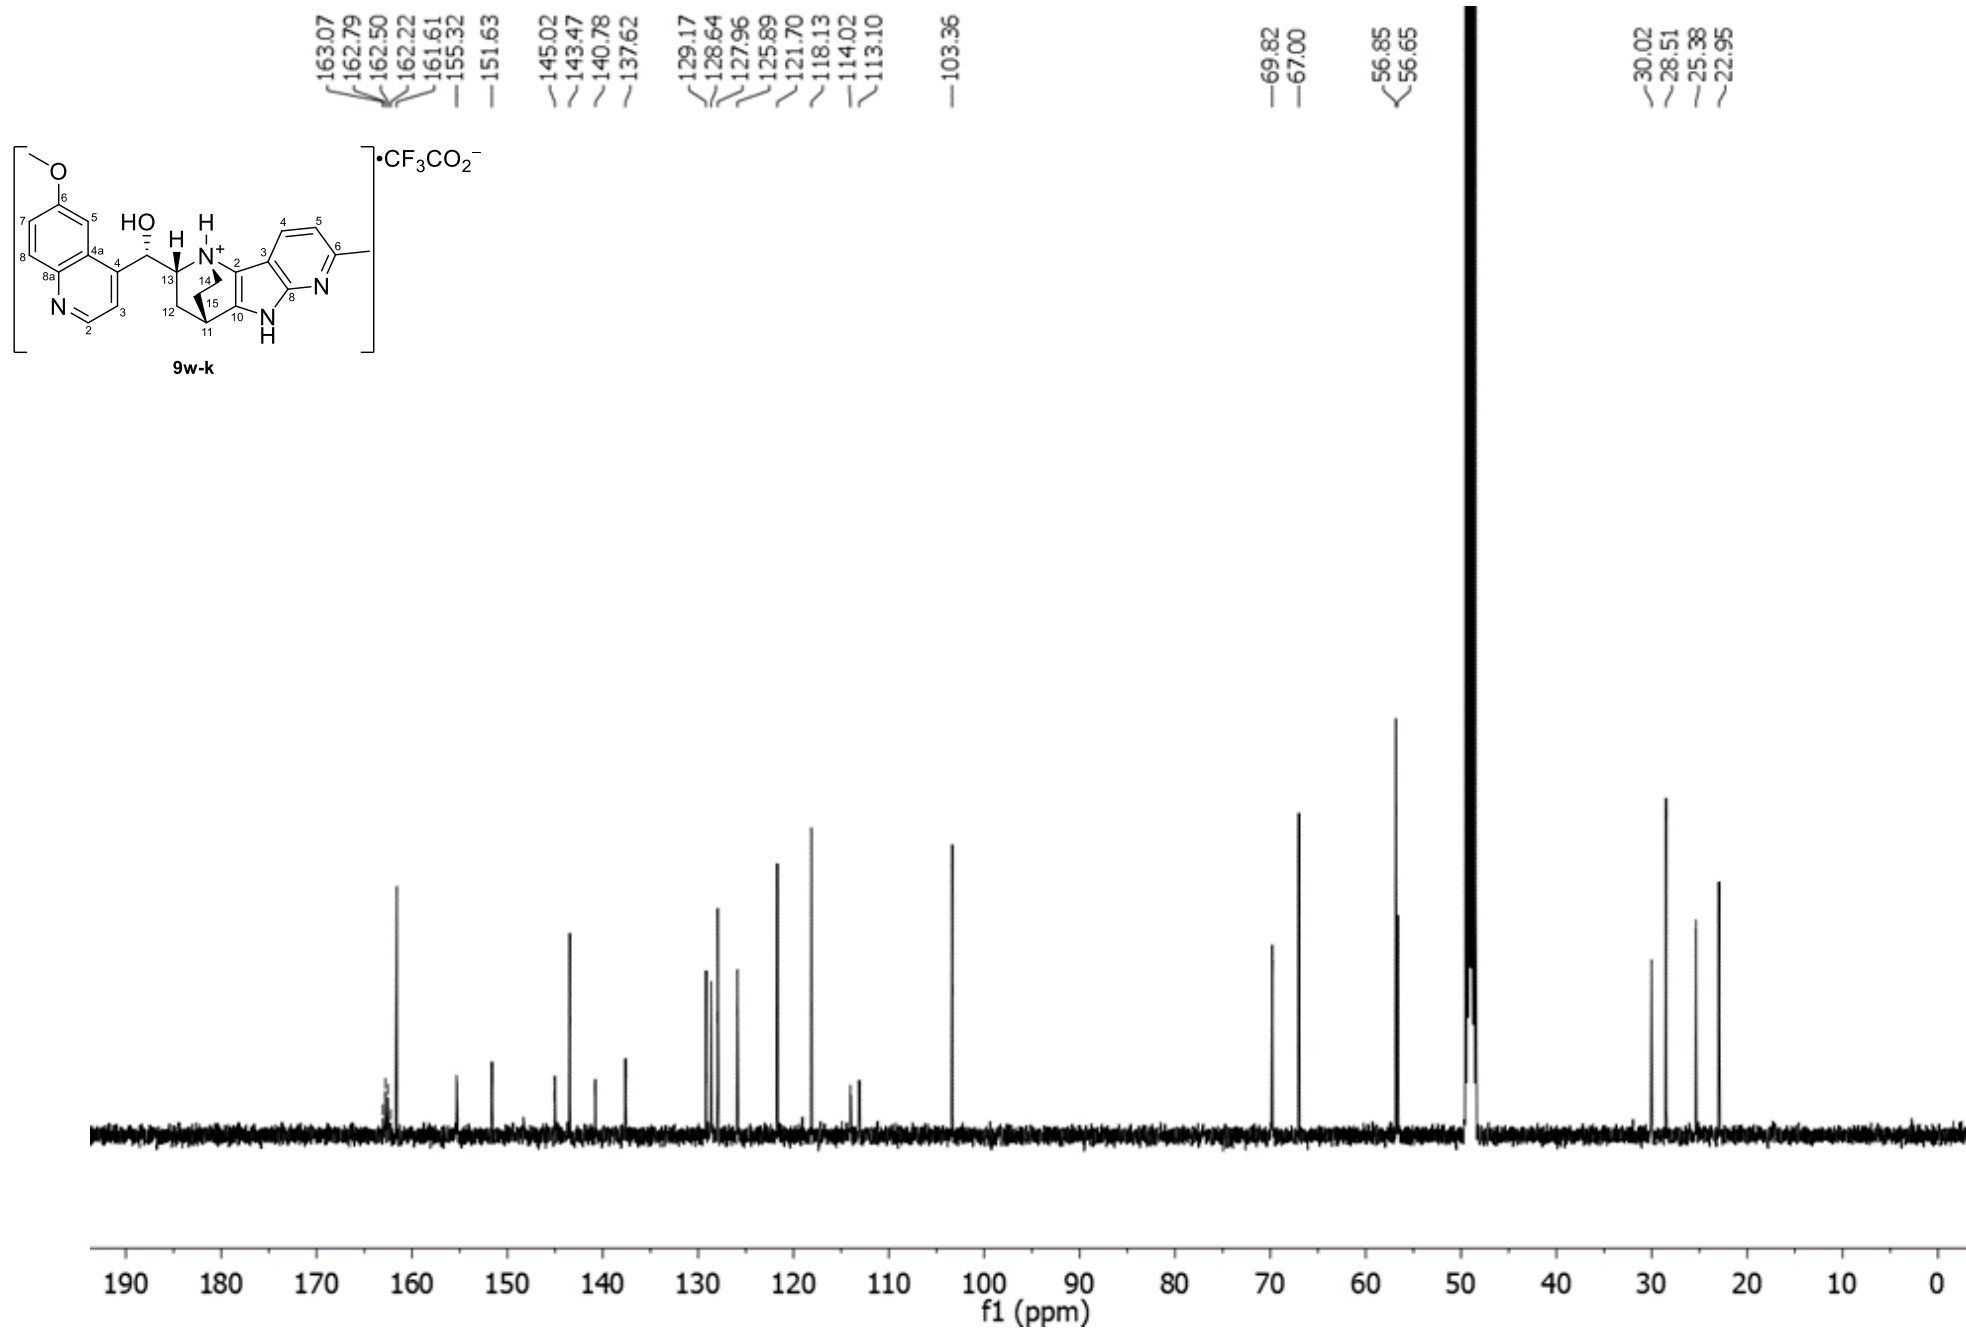

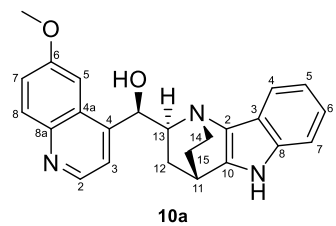

206

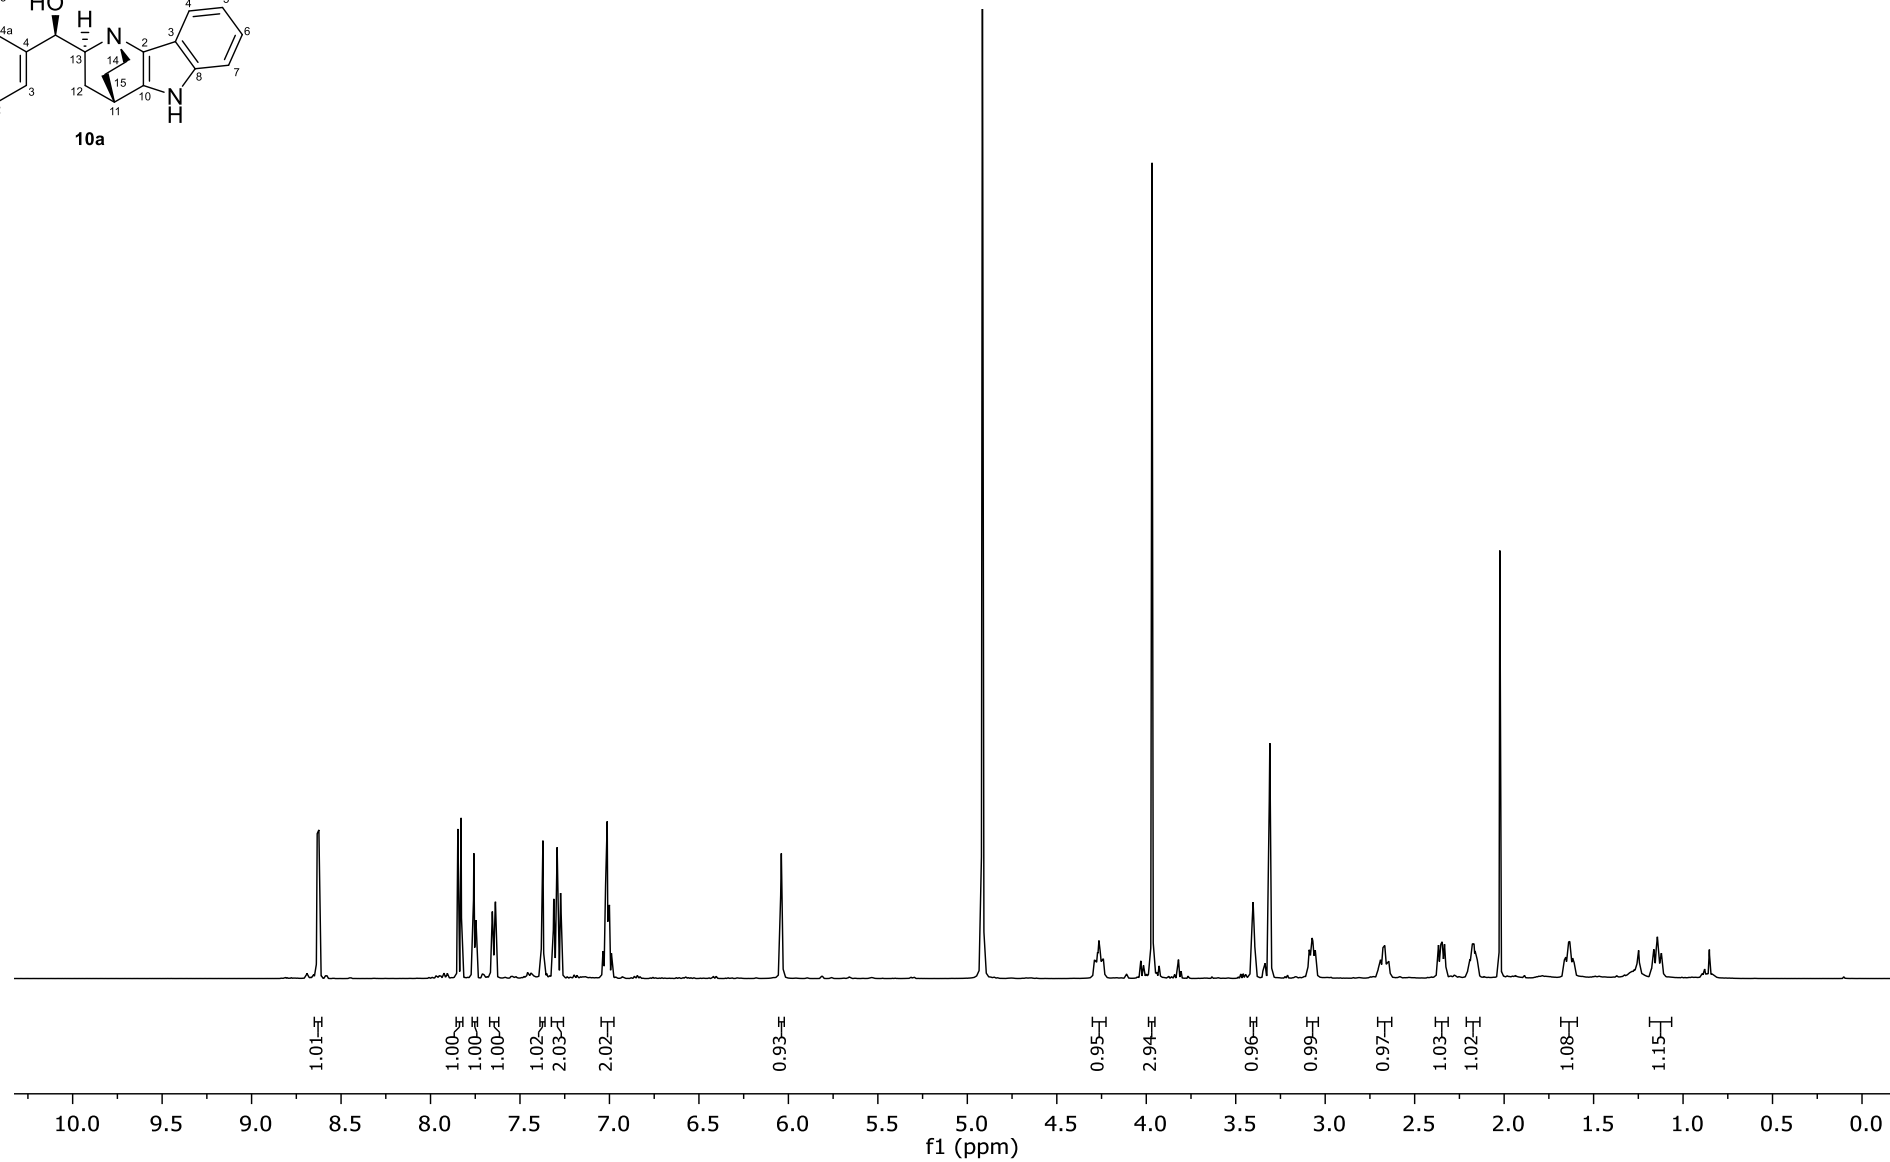

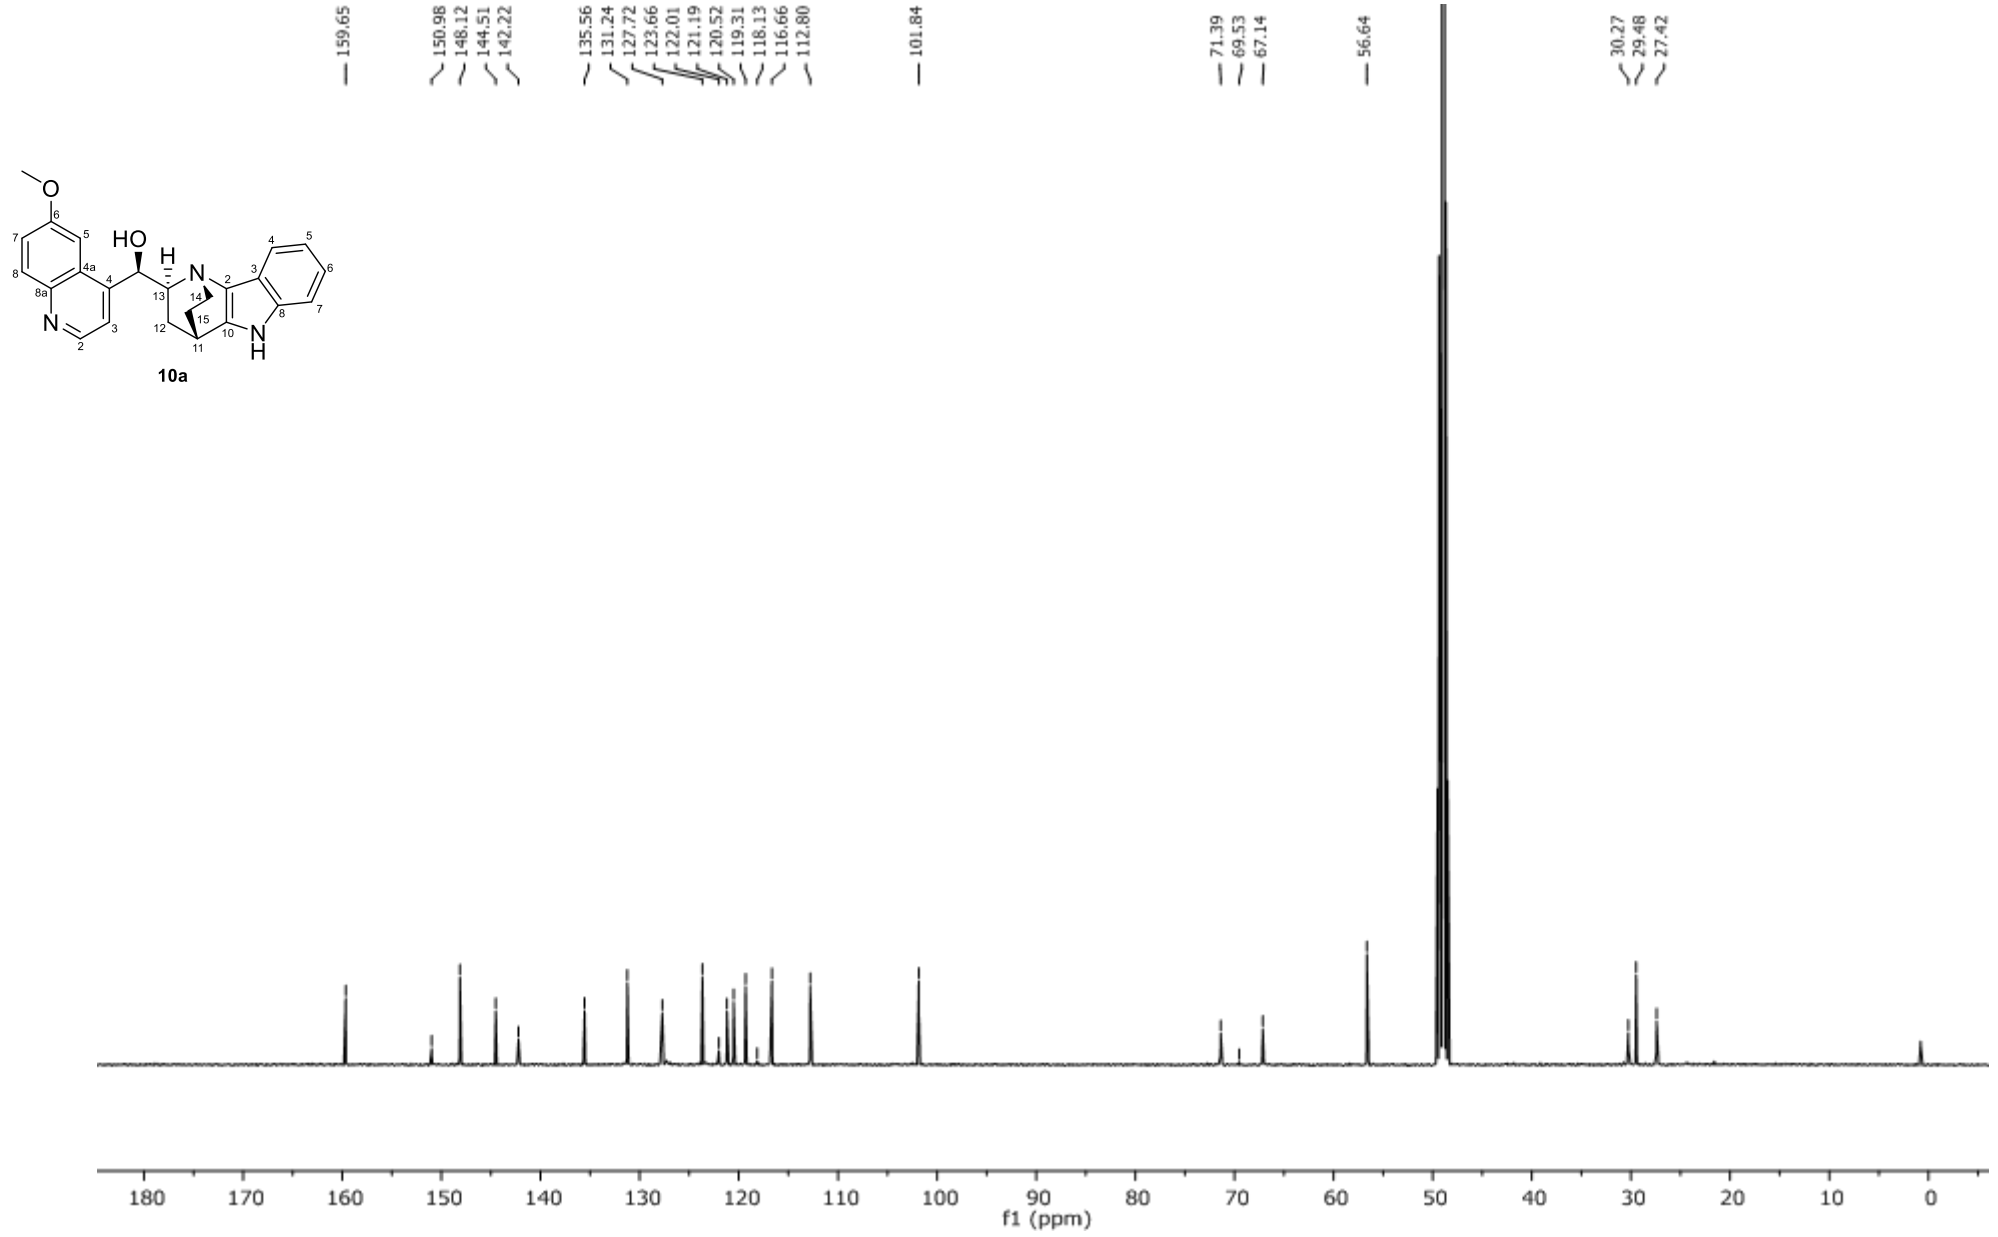



208

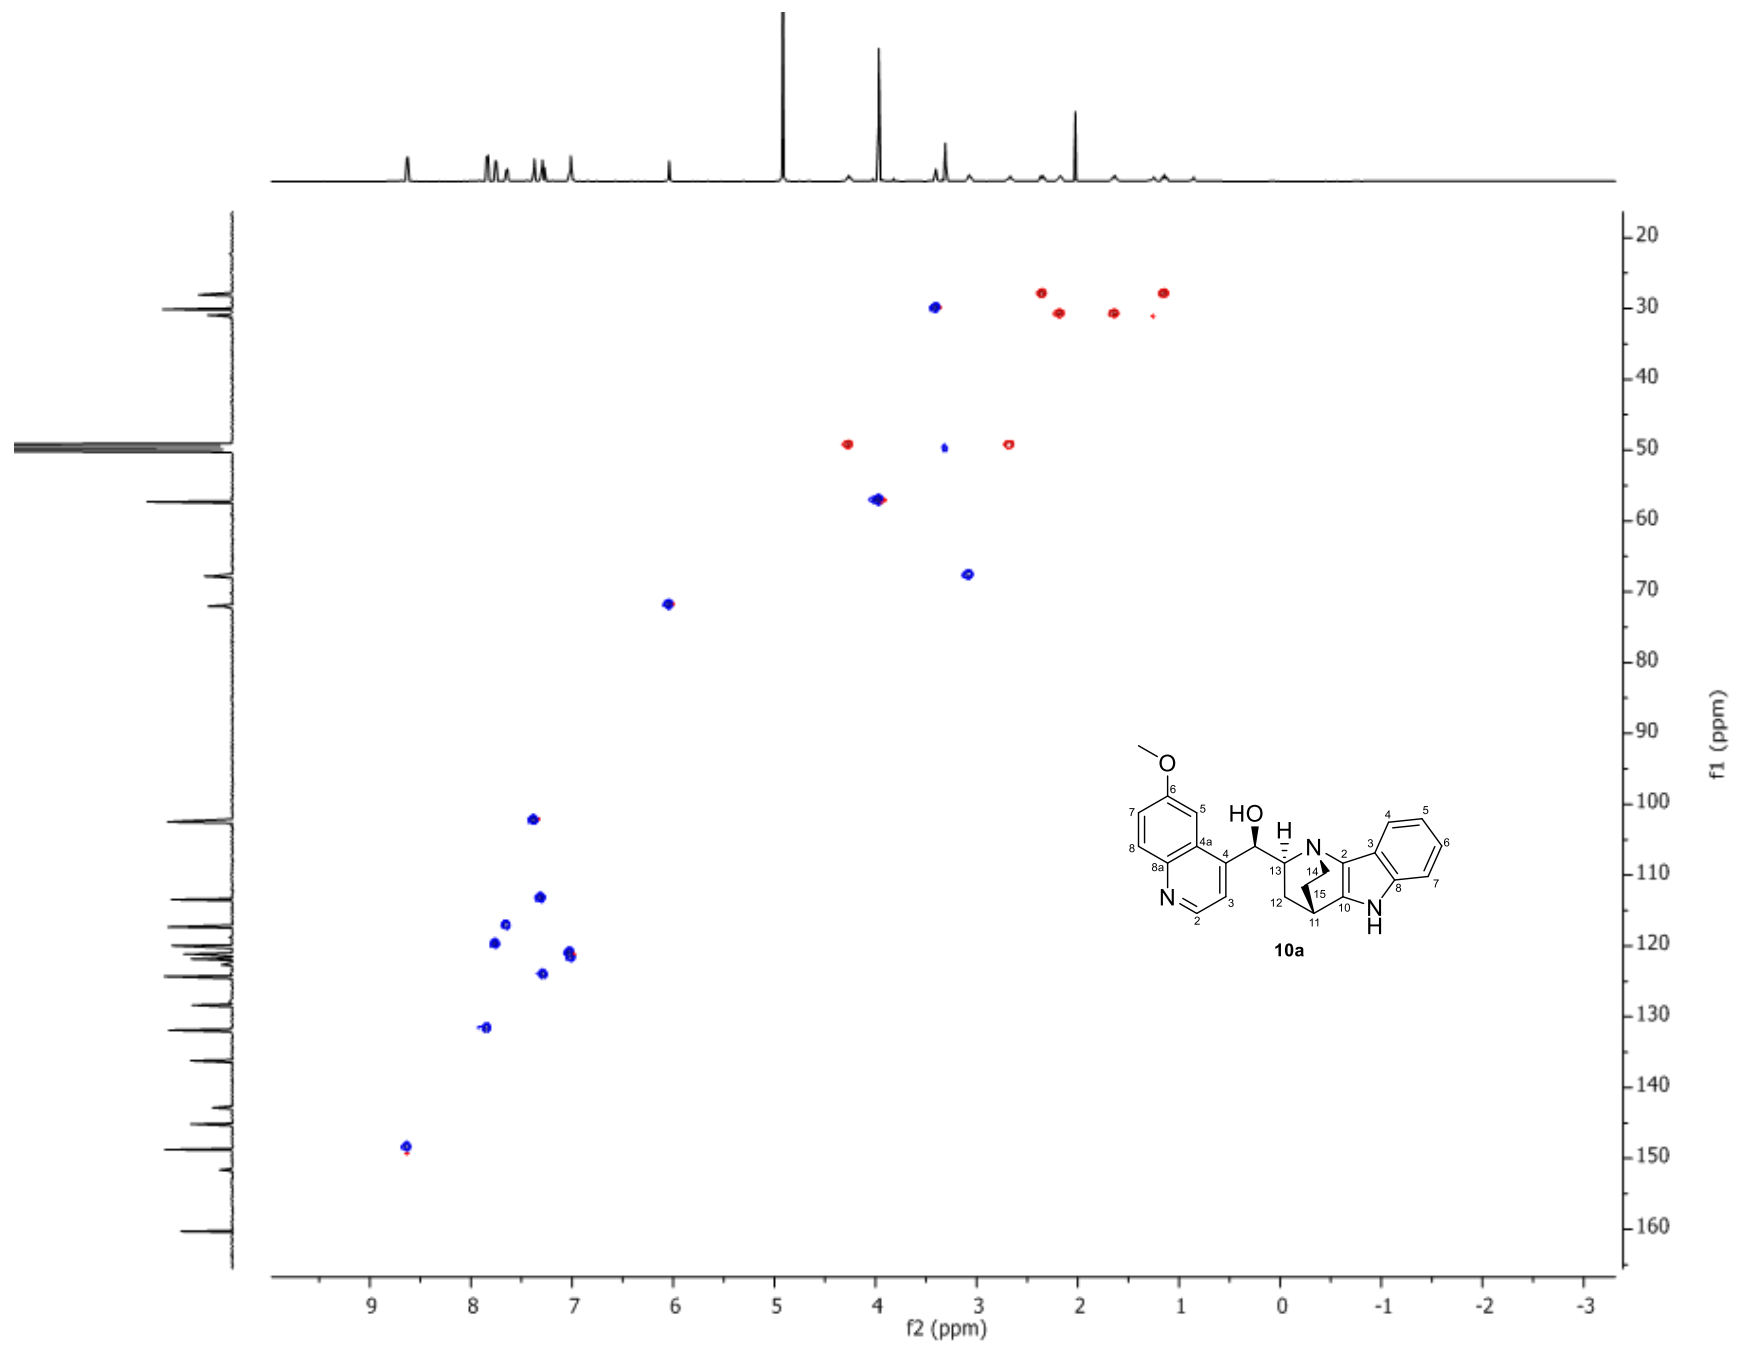

209

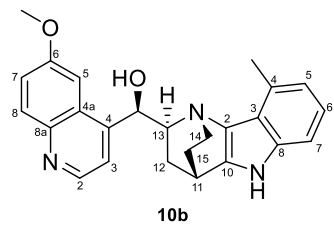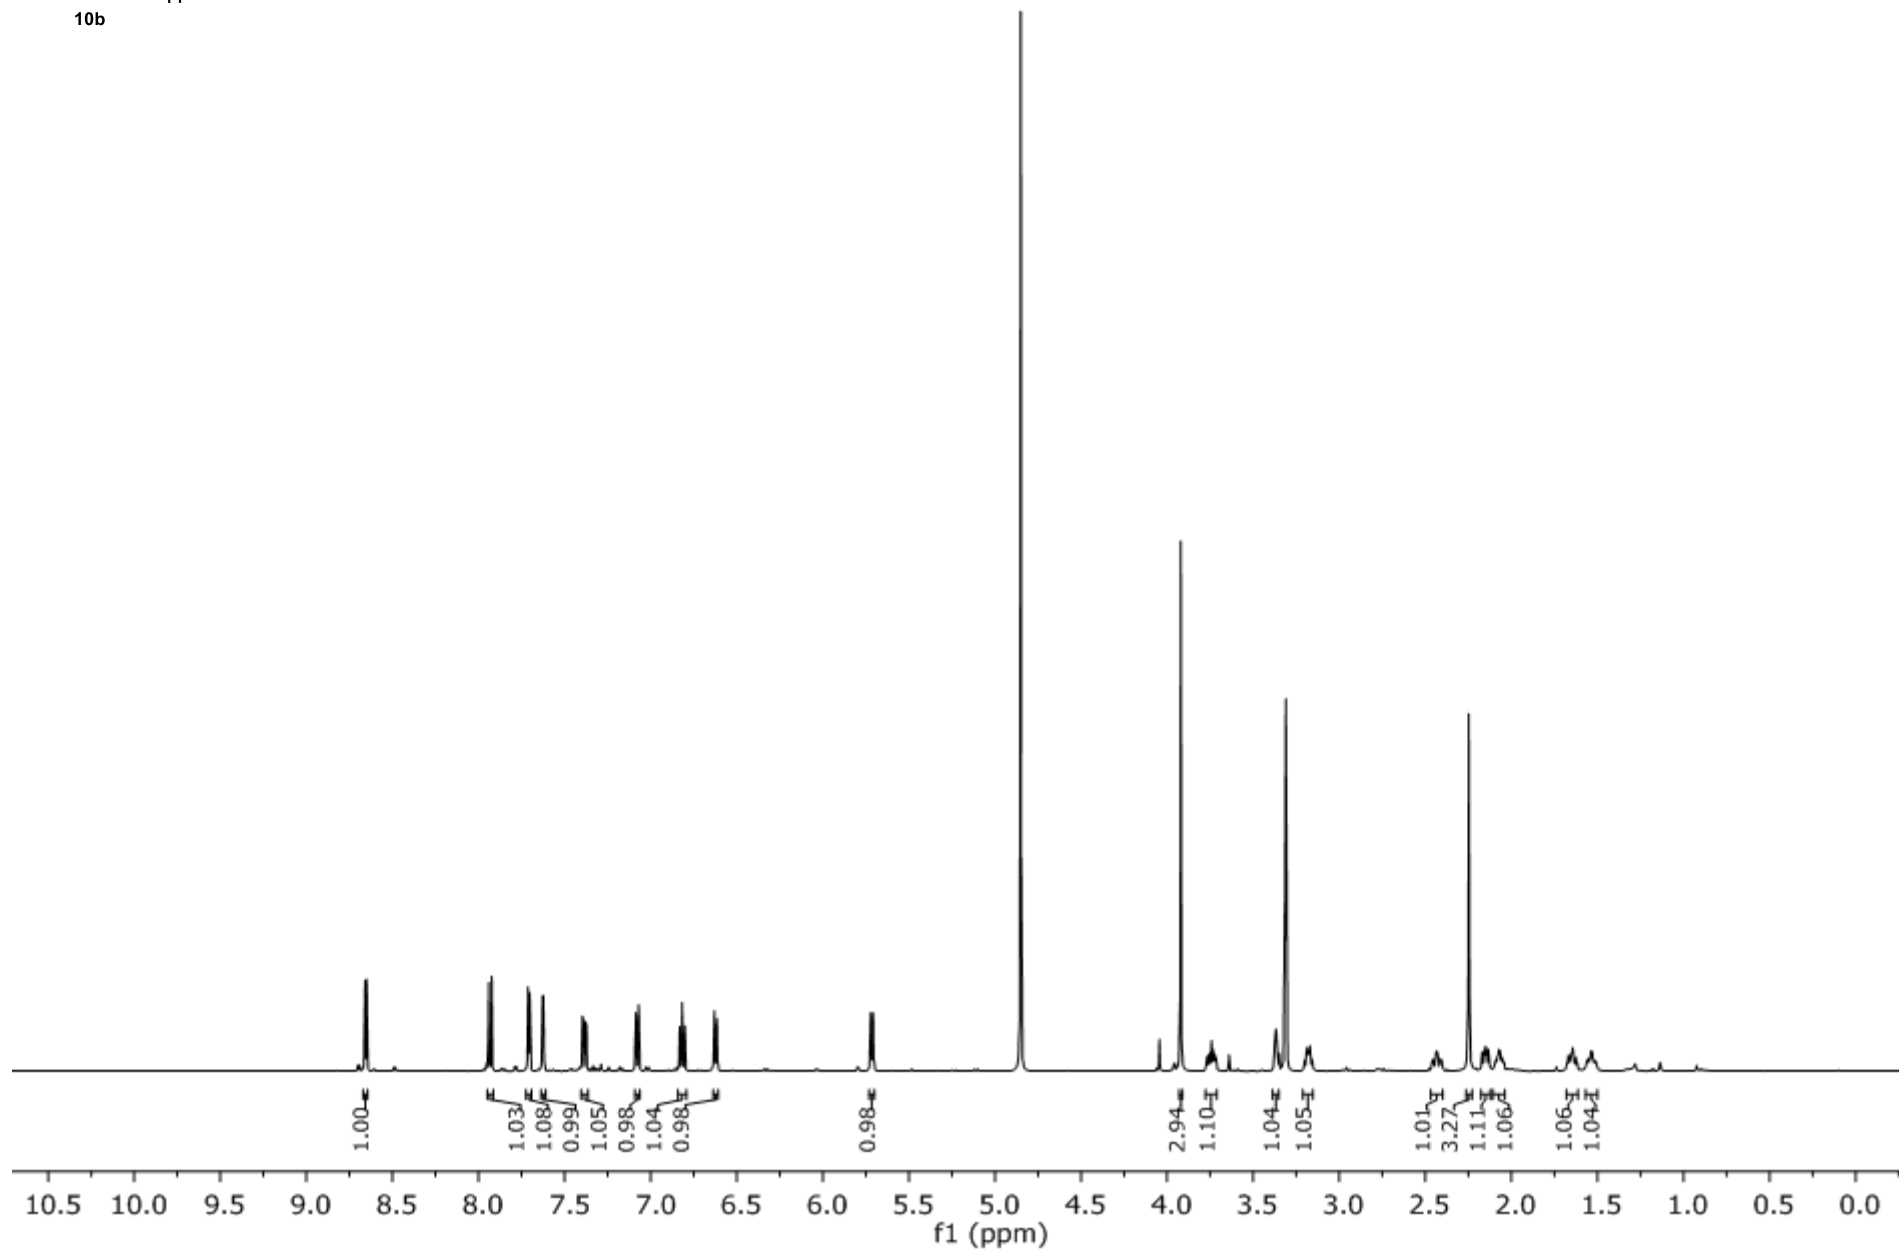

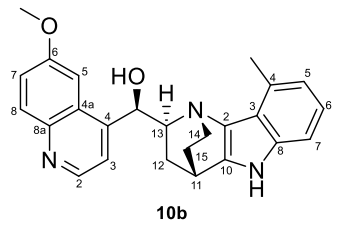

- 159.26
- ~ 151.63
- 148.06
- ~ 144.91
- ~ 142.11
- 135.30
- 131.12
- 130.35
- 128.90
- 128.78
- 123.00
- 122.02
- 120.78
- 120.77
- 120.56
- 109.97
- 103.39

- 73.45
- 67.70
- 56.20
- 47.22
- 31.71
- 31.20
- 29.53
- 18.74

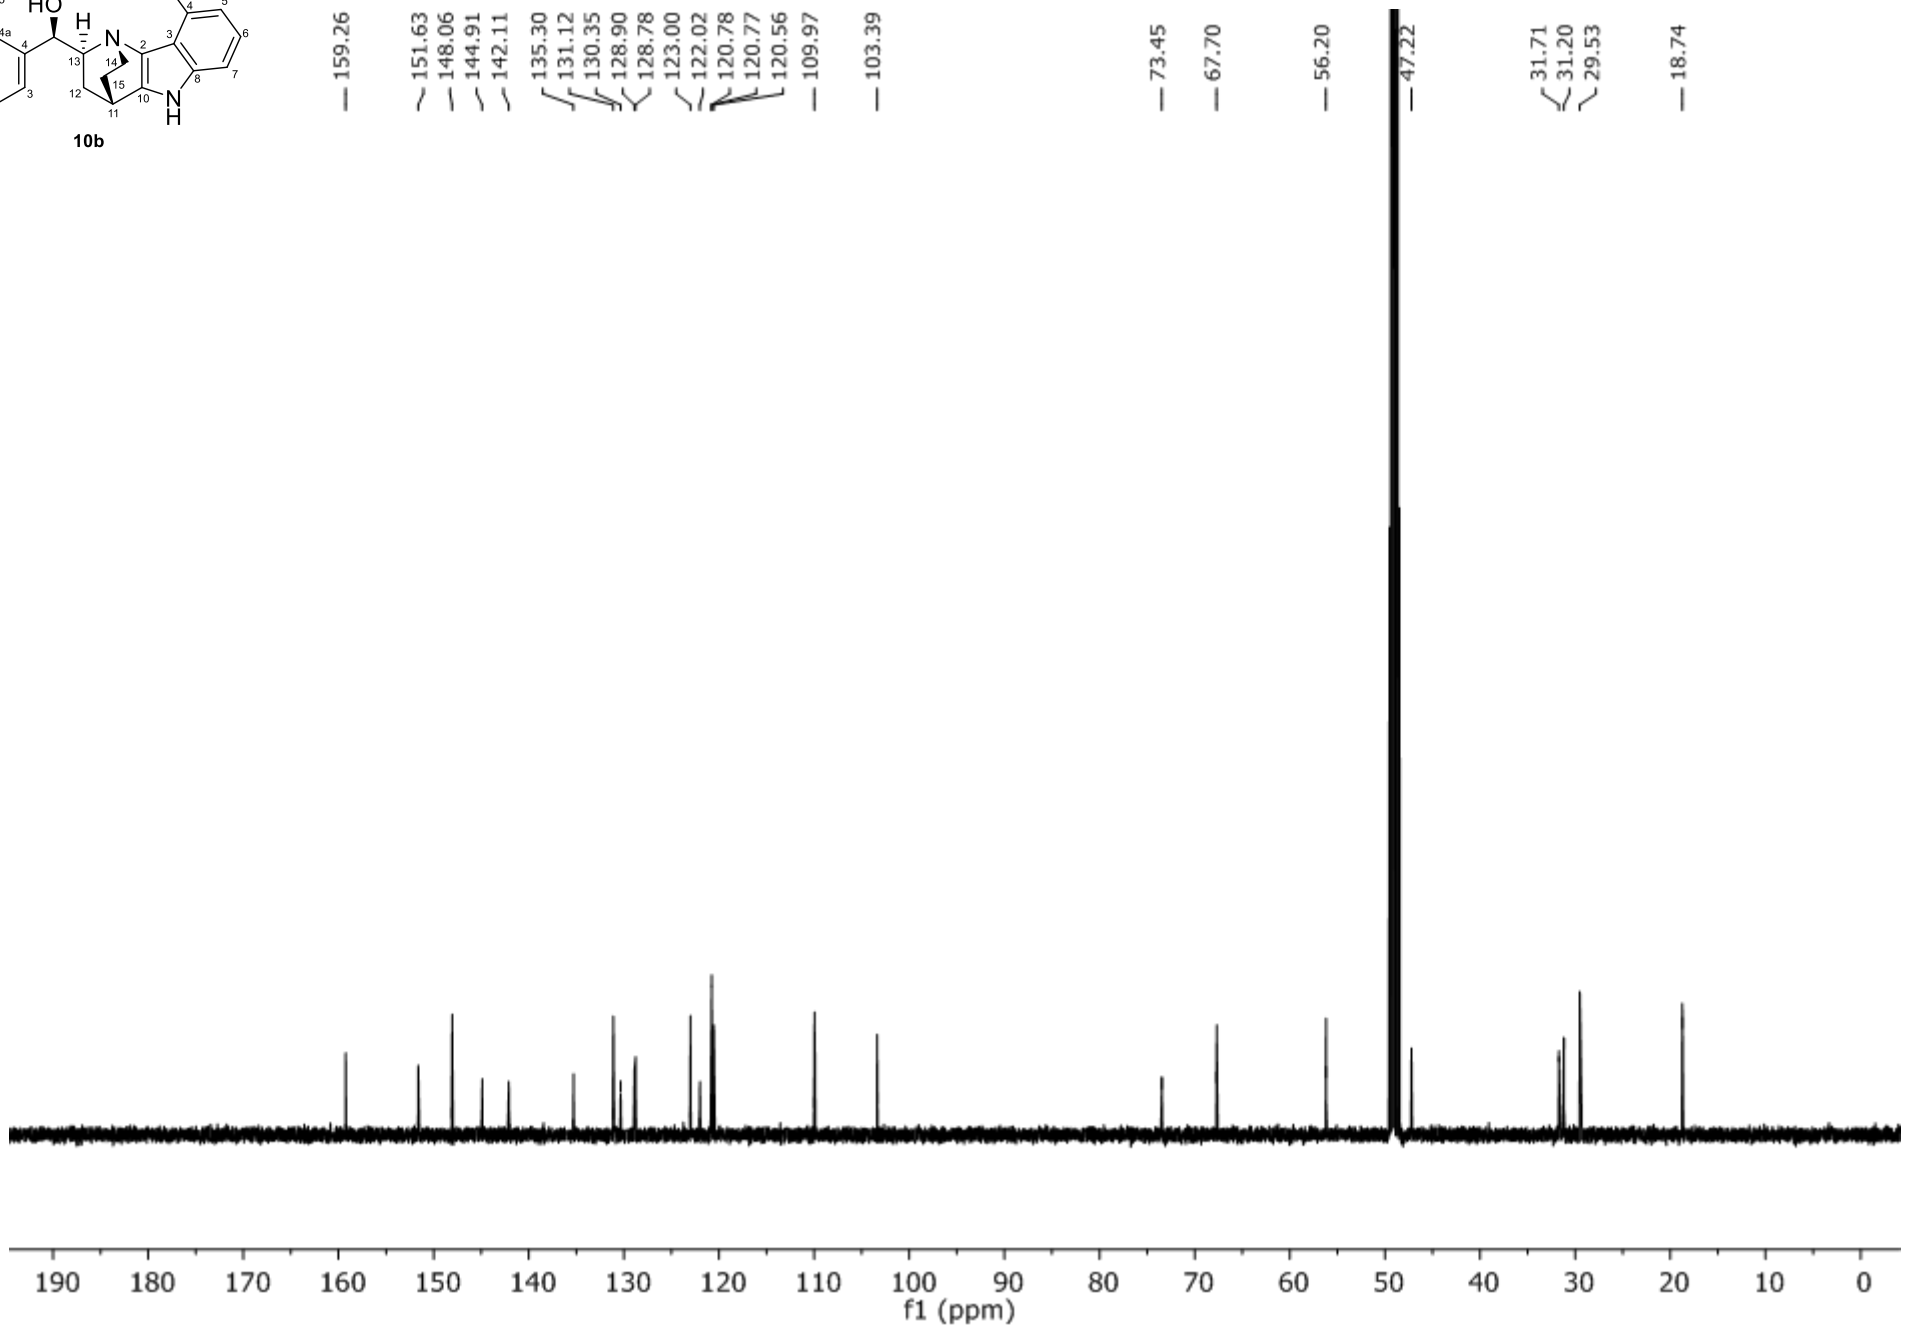

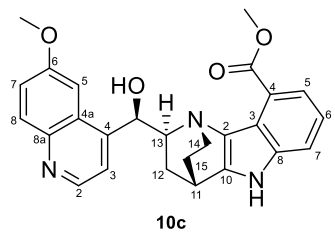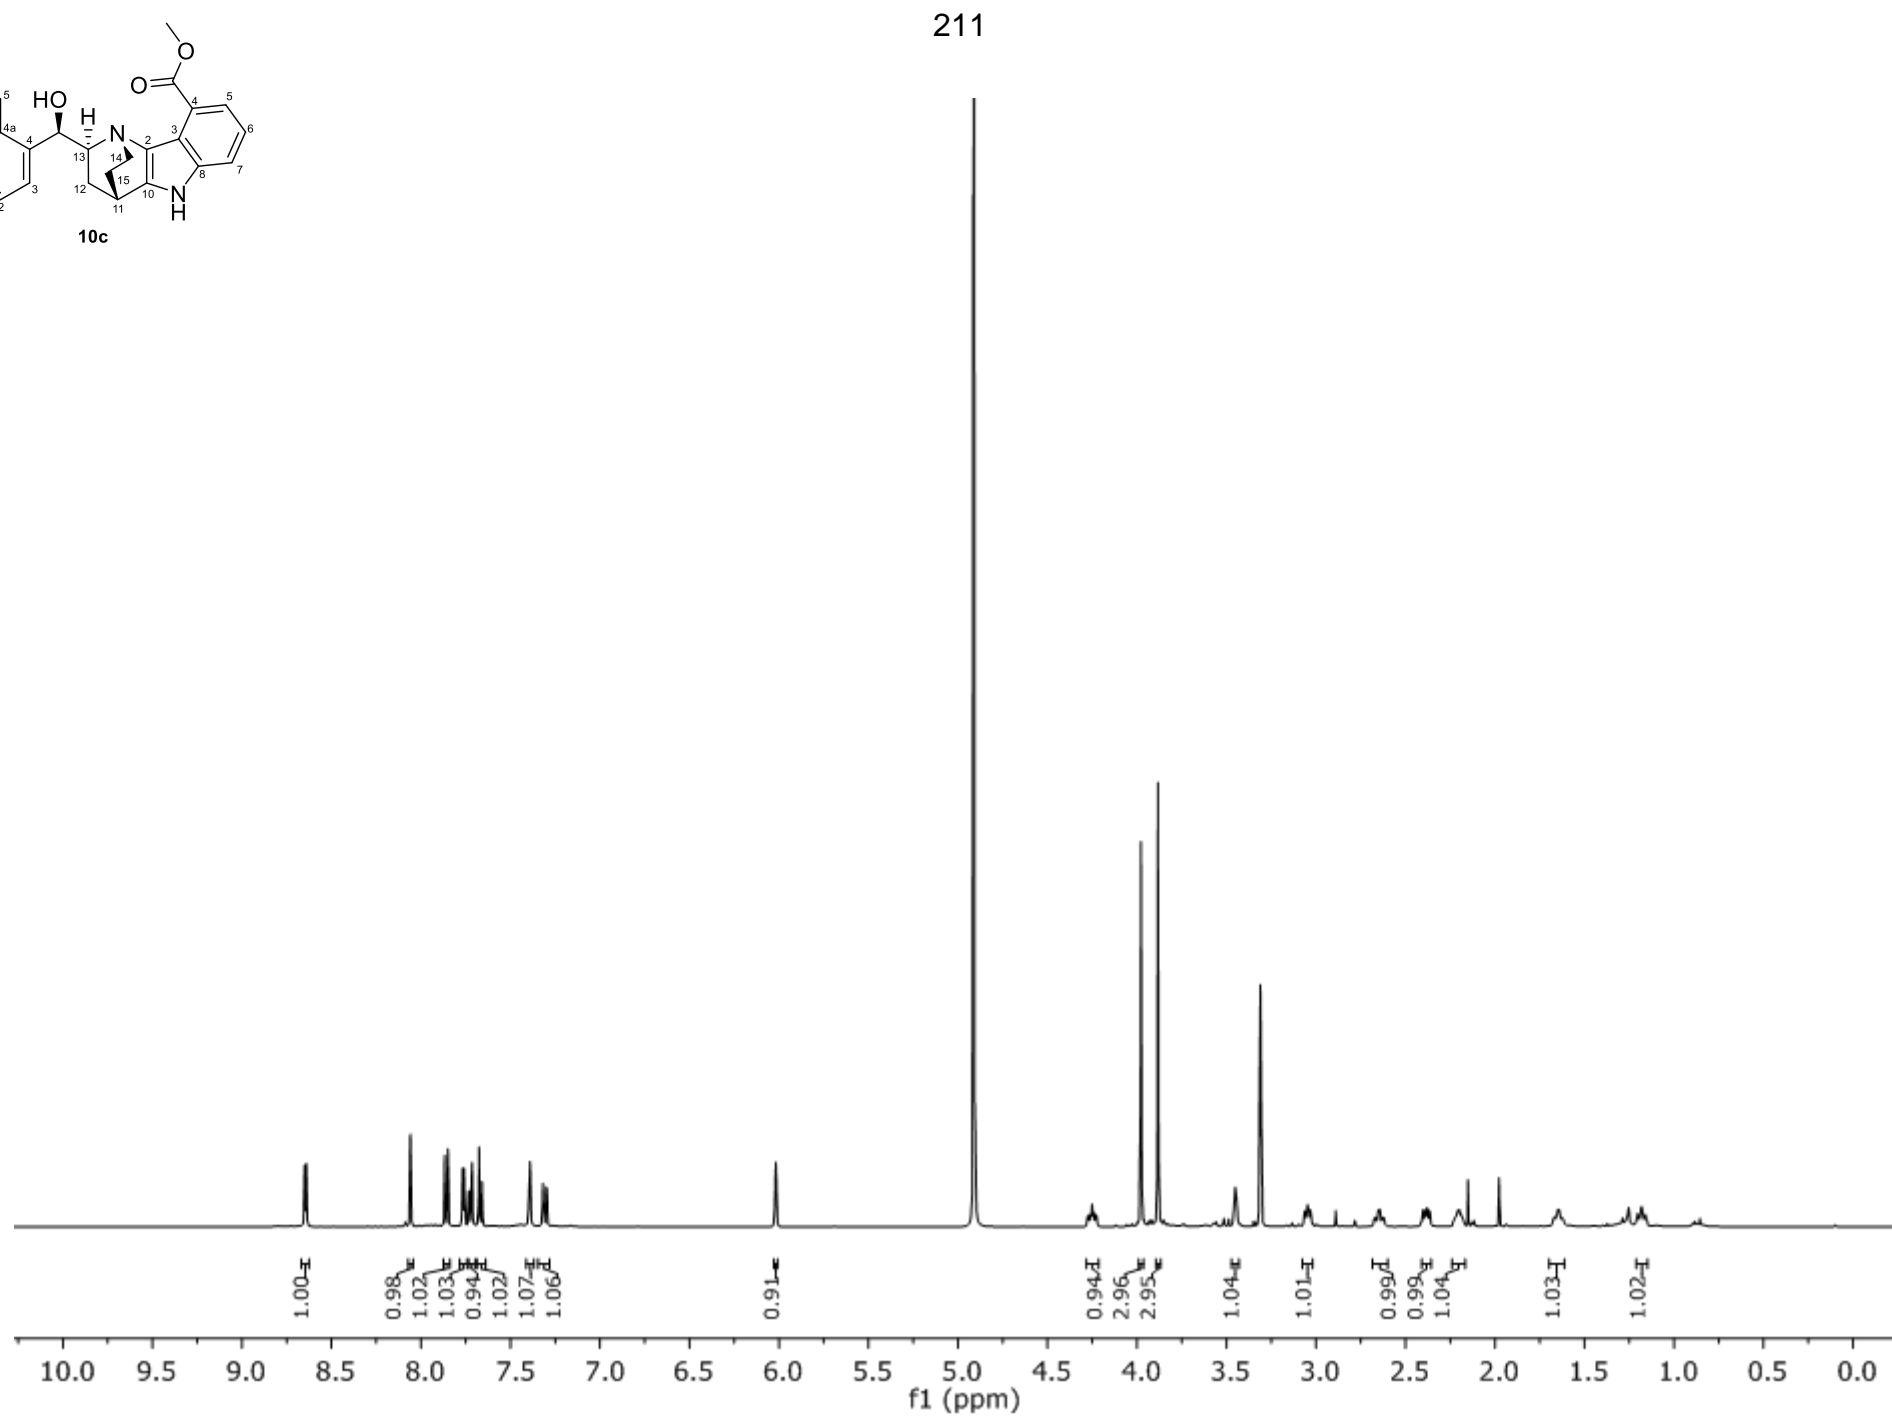

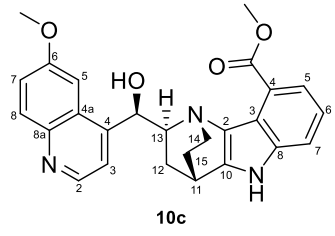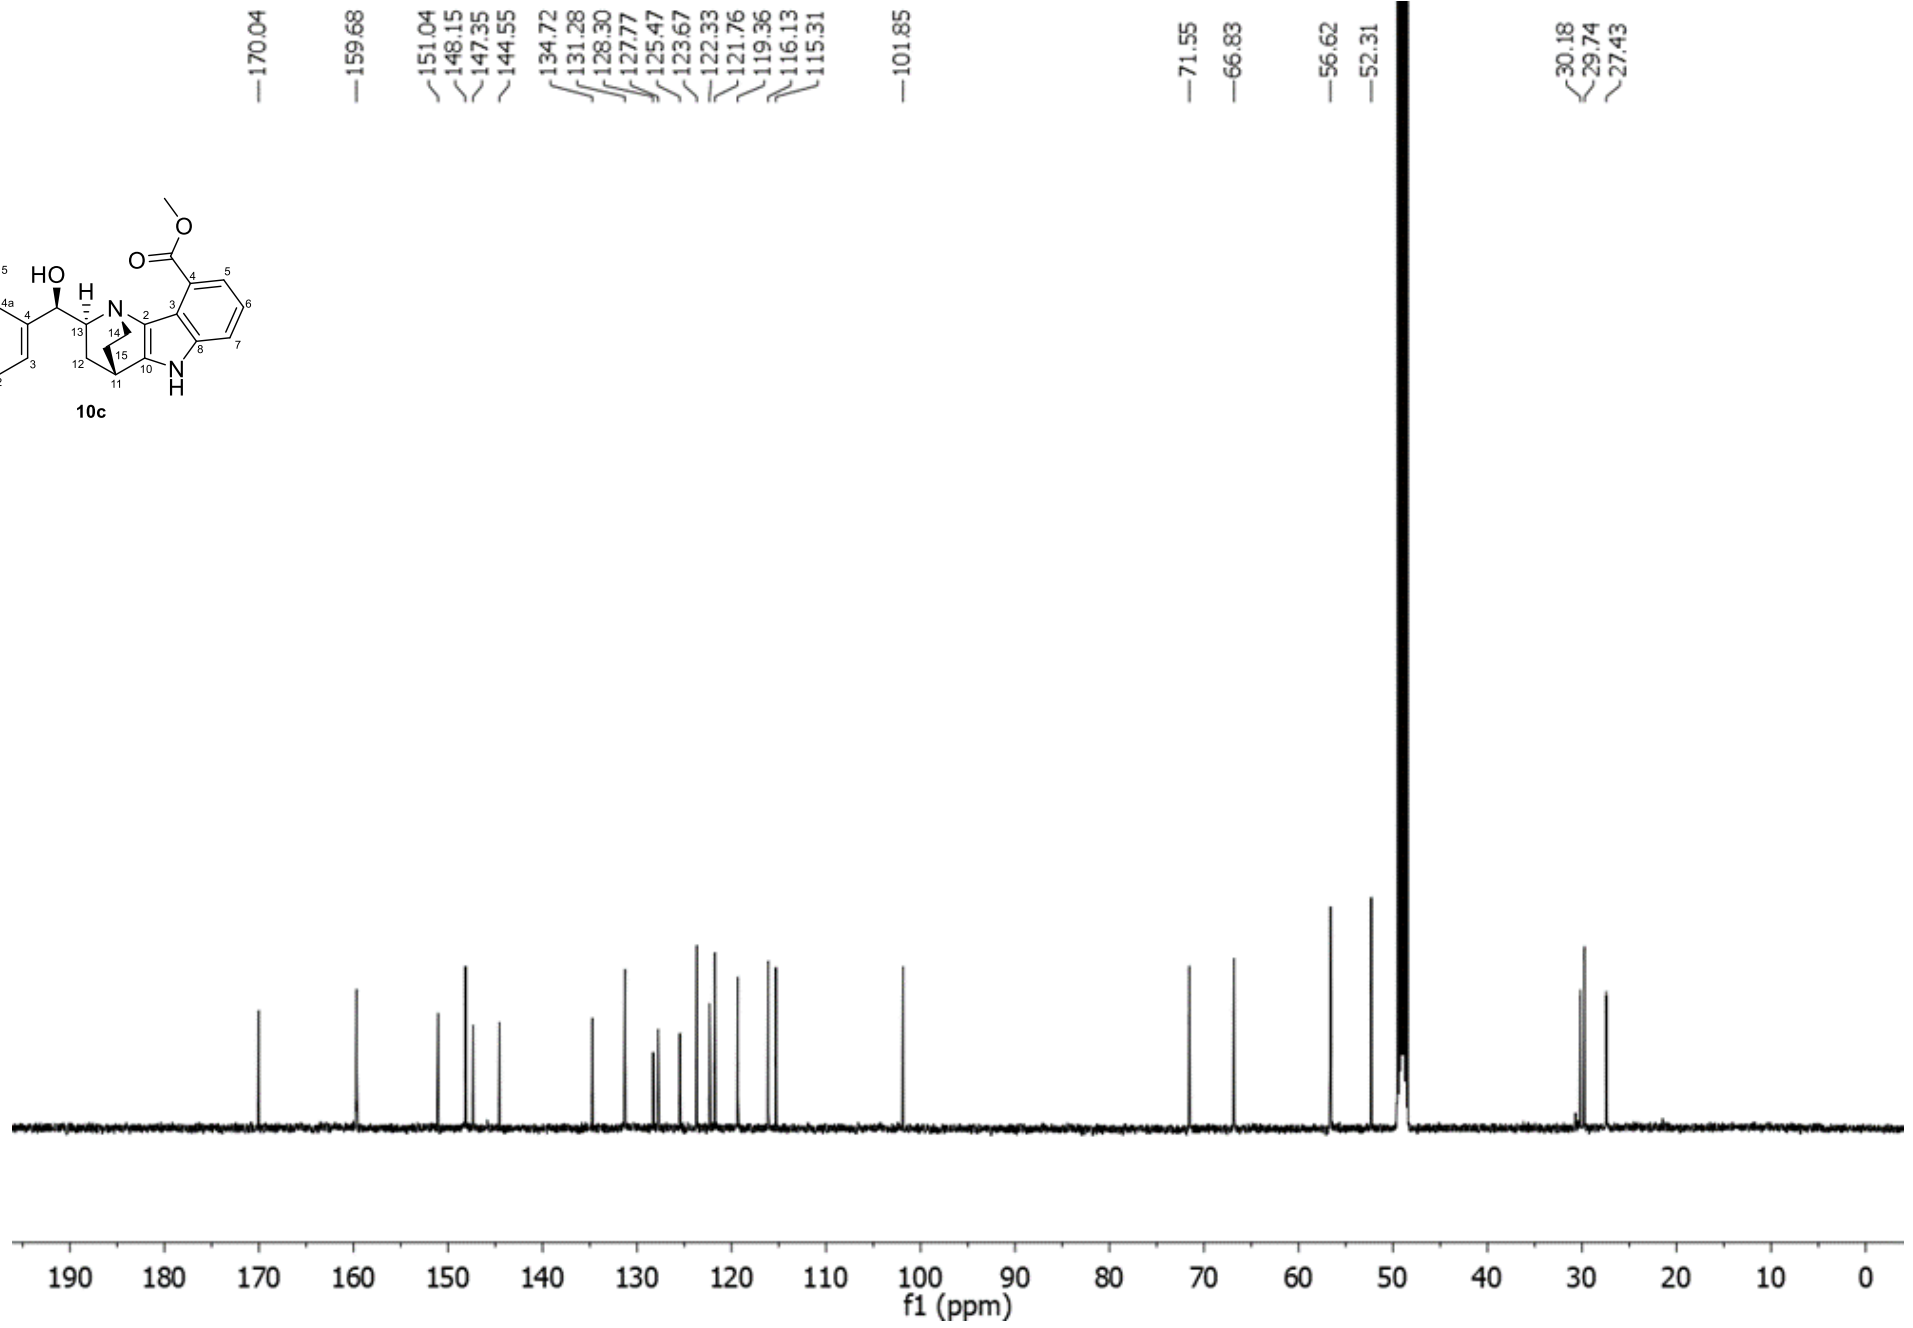

213

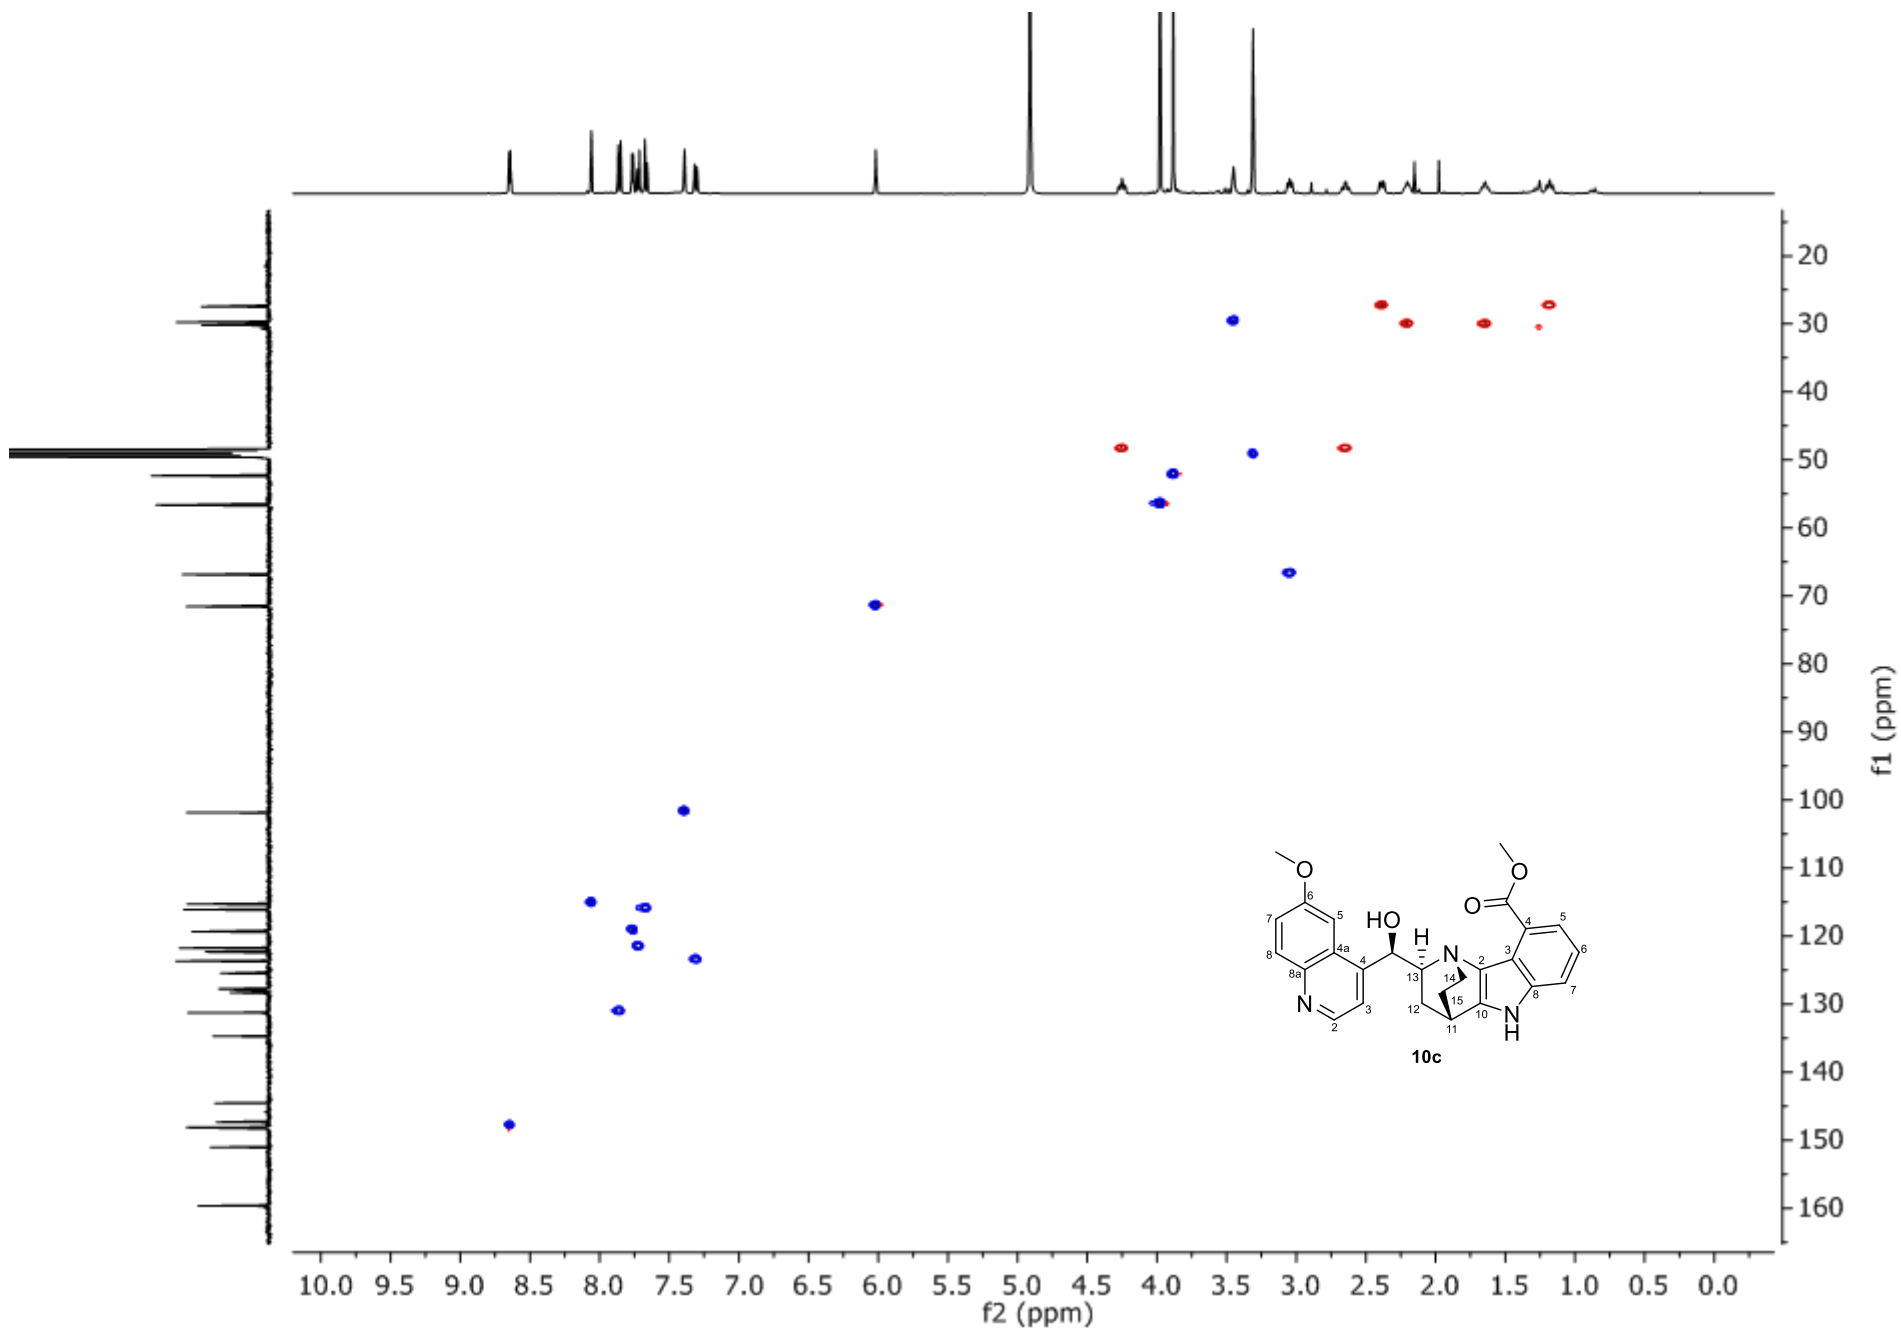

214

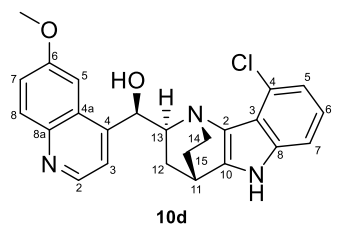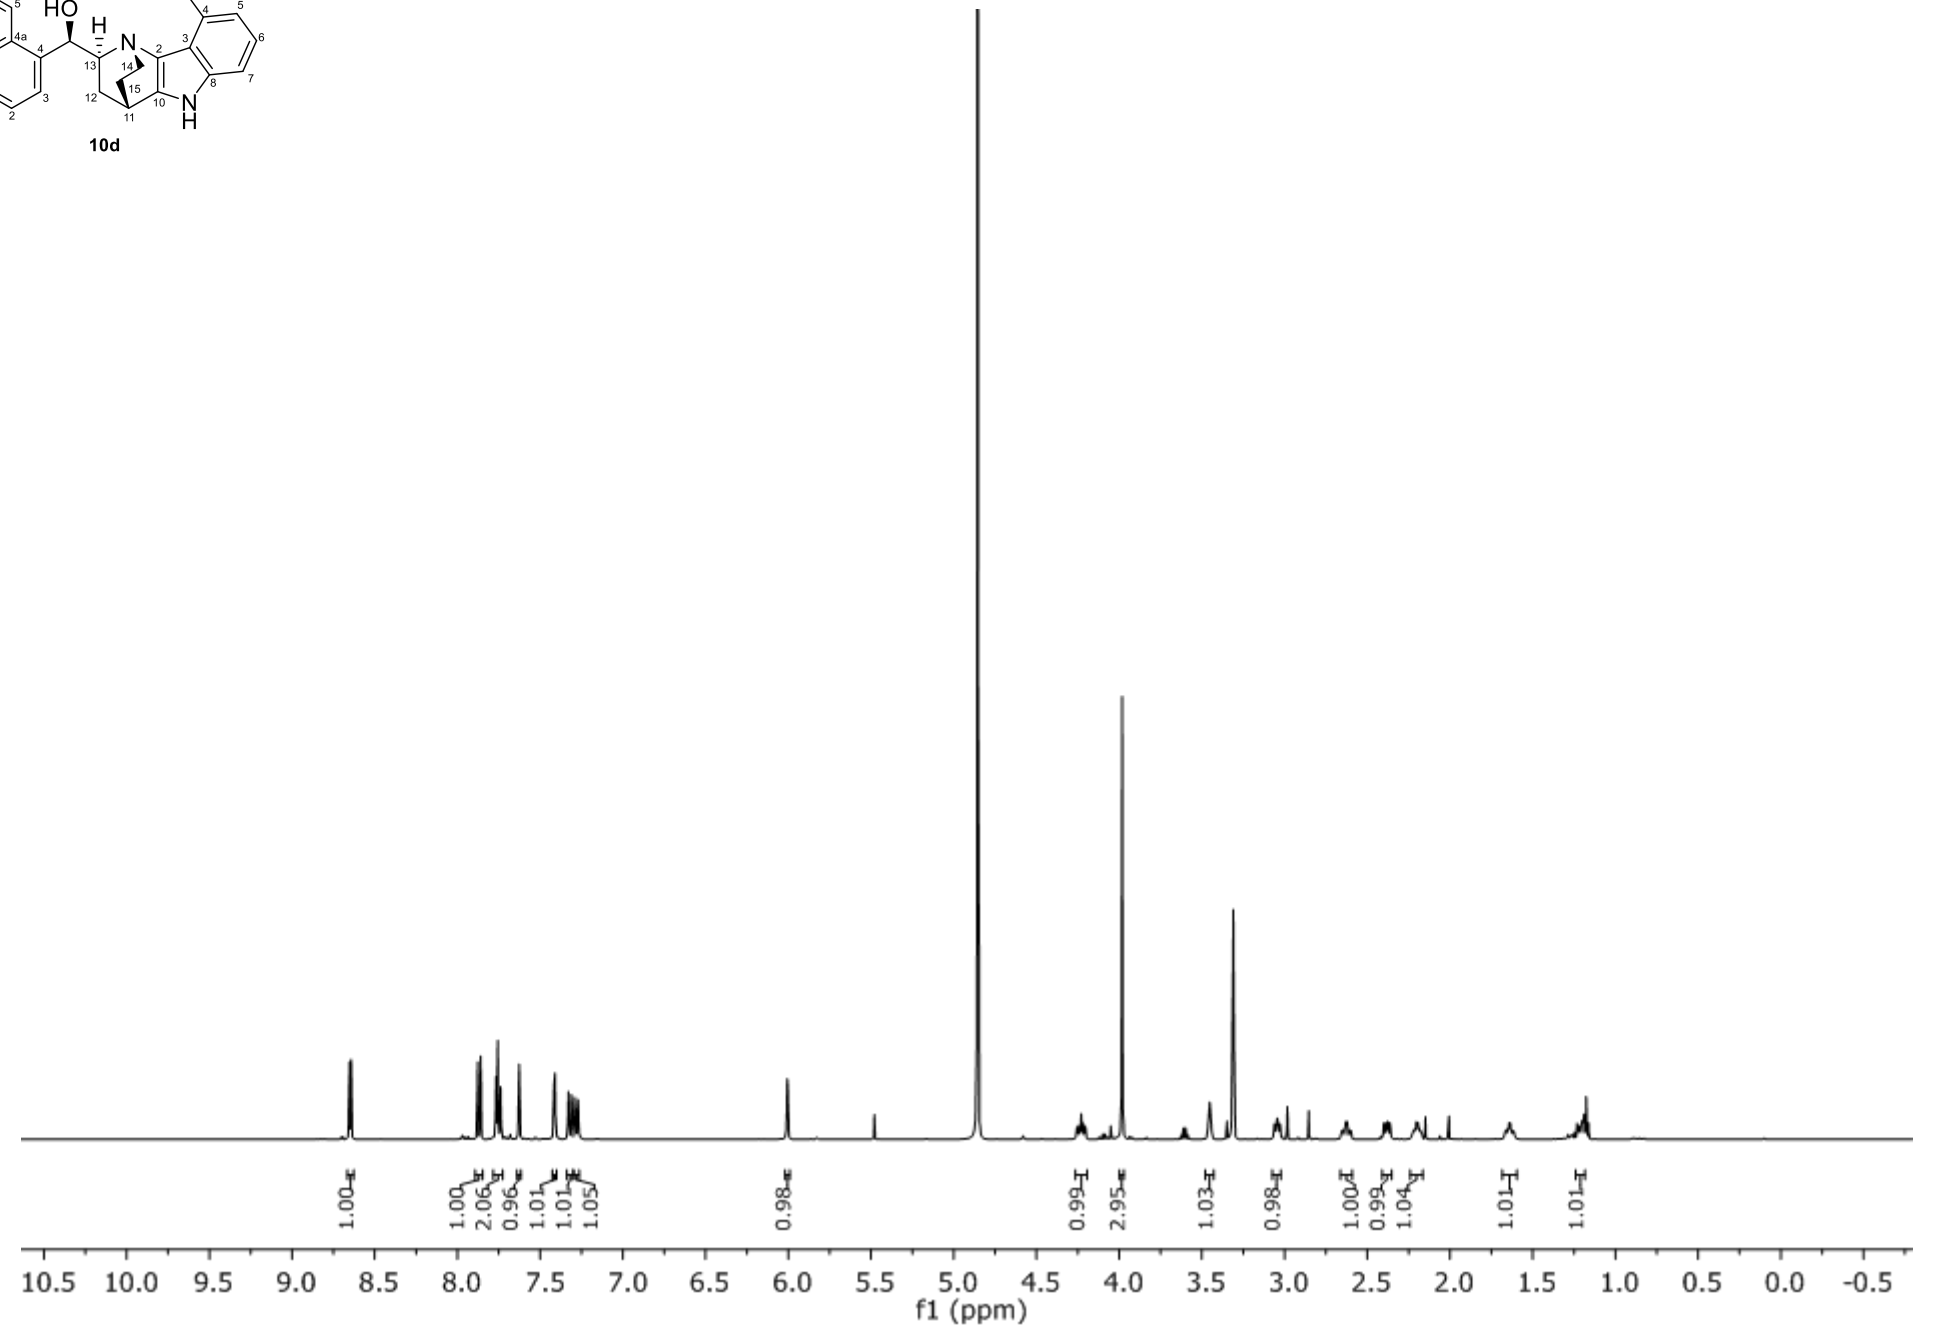

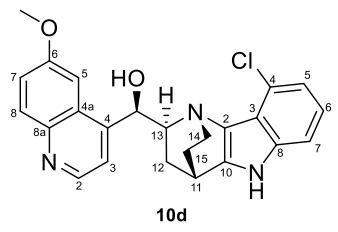

- 159.69
- ✓ 151.10
- ✓ 148.17
- 146.38
- ✓ 144.62
- ✓ 134.34
- ✓ 131.30
- ✓ 128.38
- ✓ 127.84
- ✓ 124.43
- ✓ 123.62
- ✓ 122.66
- ✓ 119.38
- ✓ 116.98
- ✓ 116.95
- 110.25
- 101.96

- 71.72
- 66.81
- 56.60

- ✓ 30.37
- ✓ 29.73
- ✓ 27.72

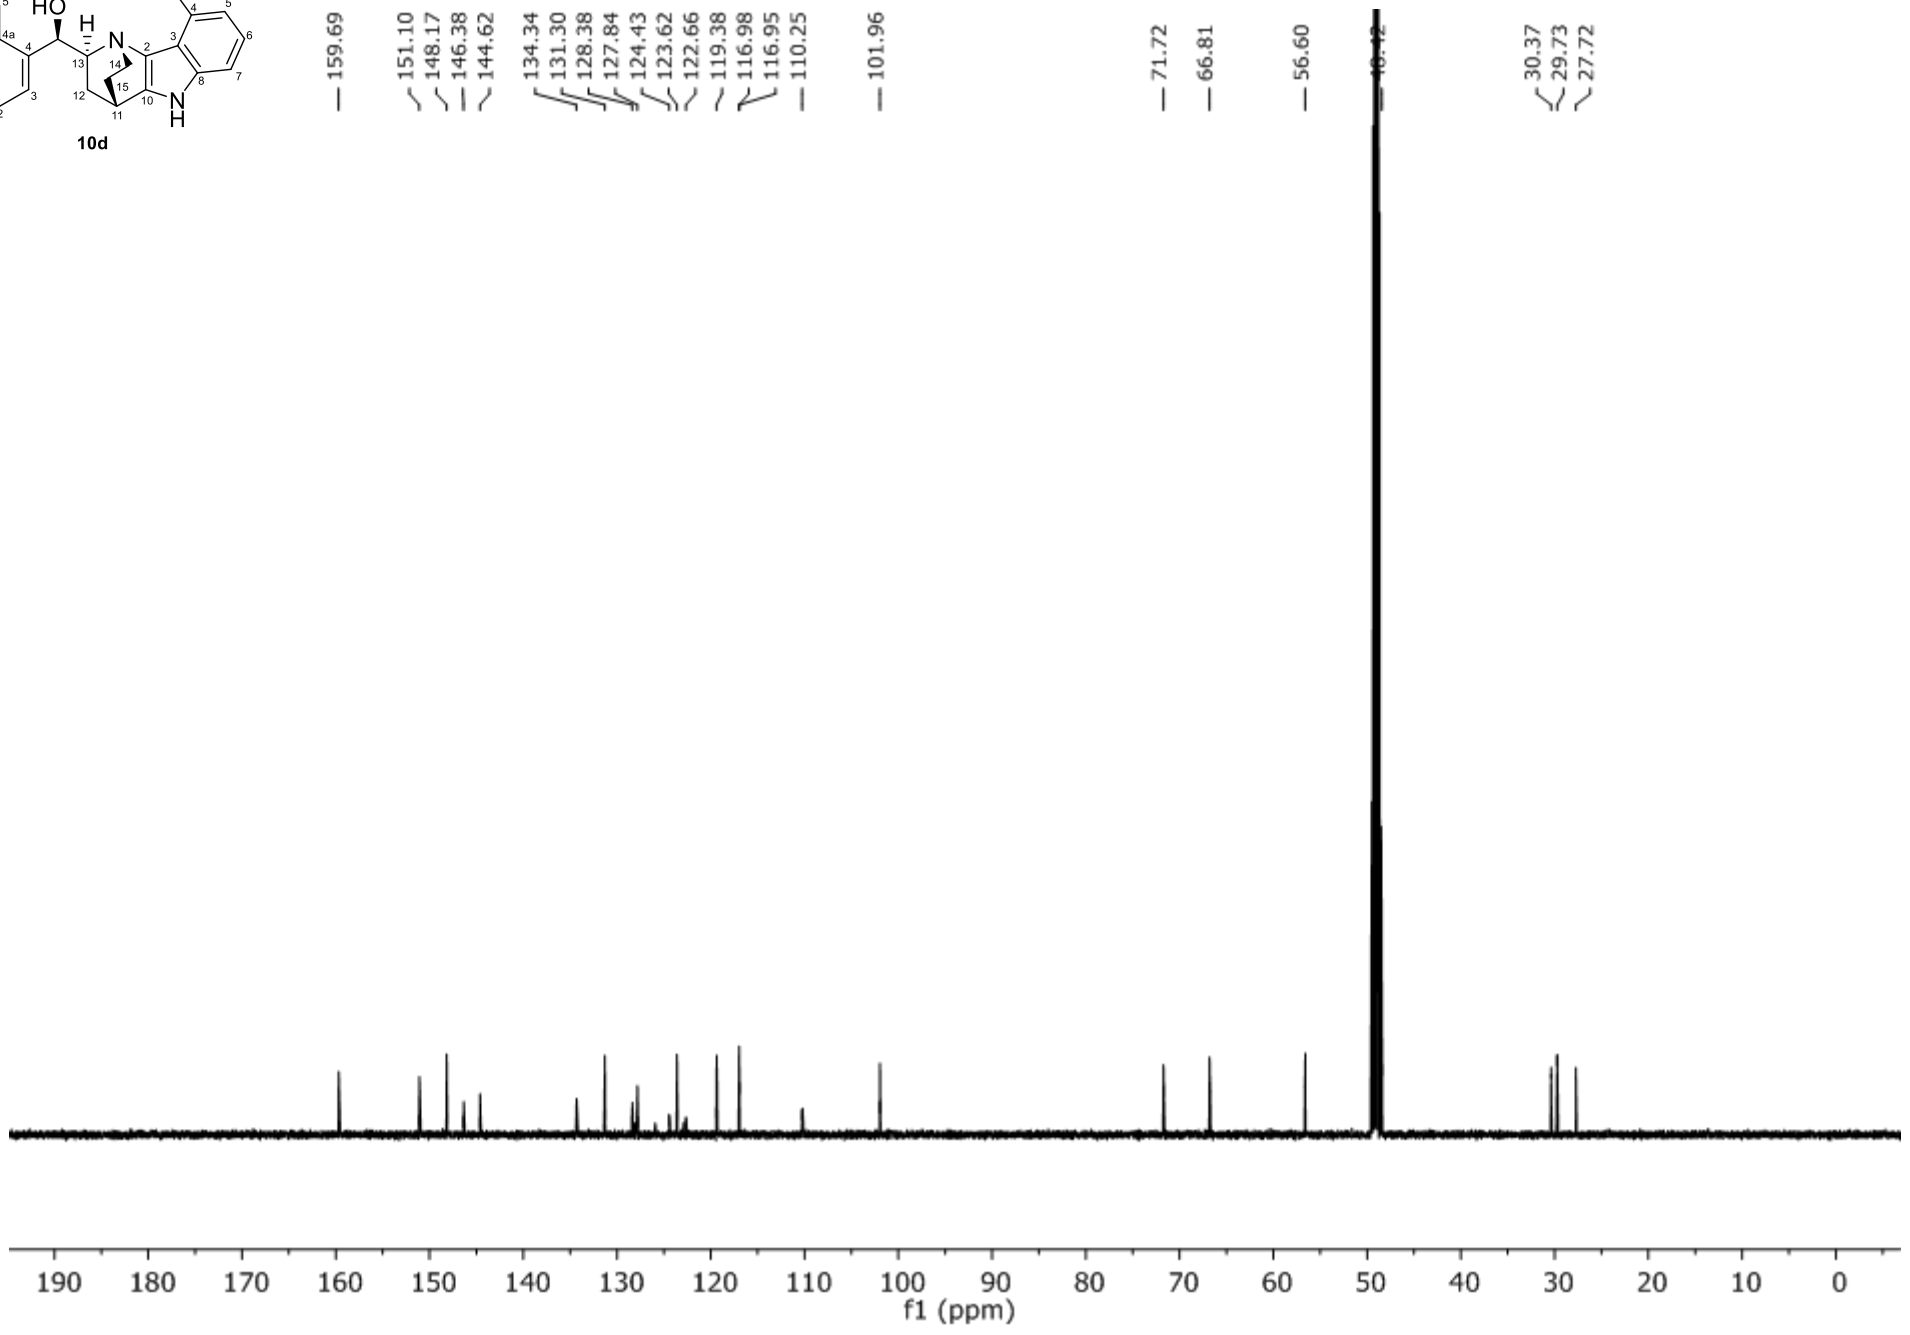



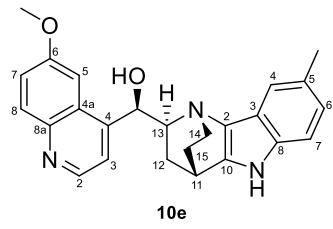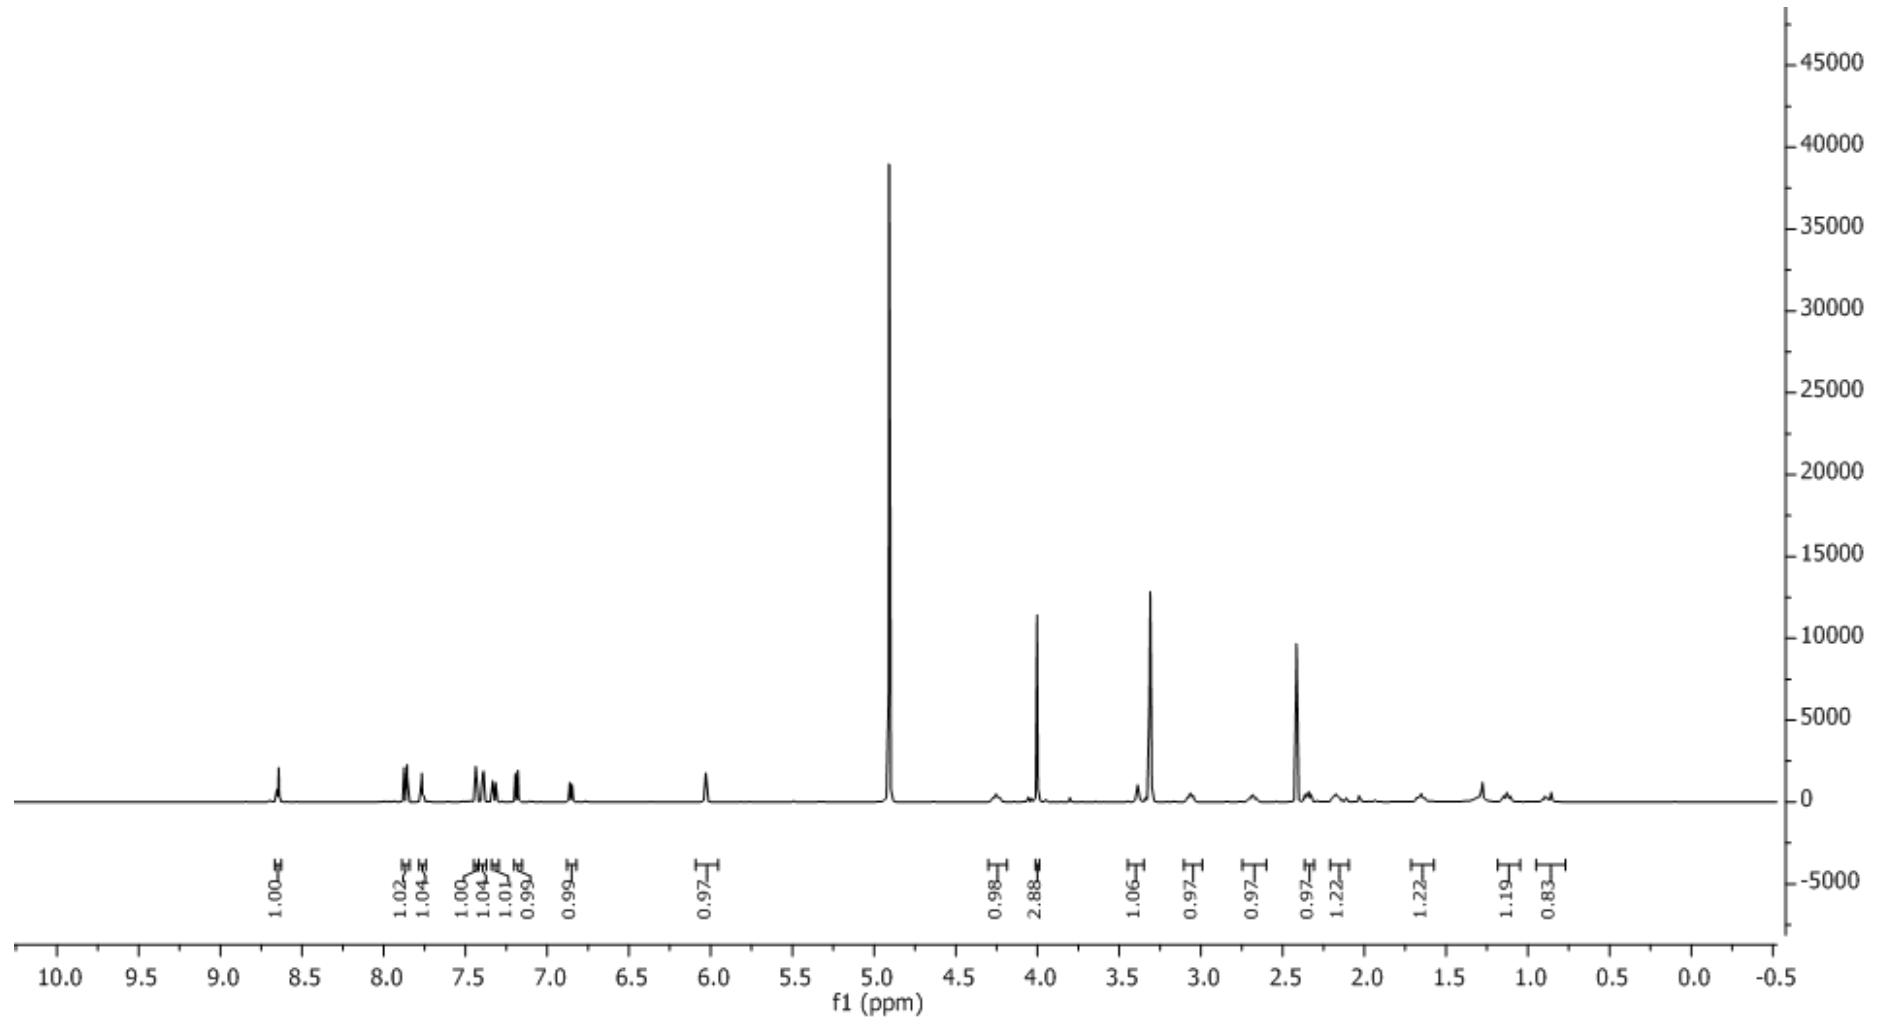

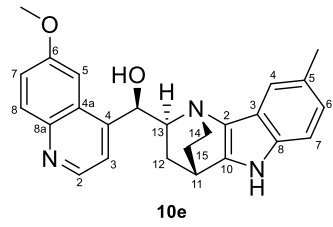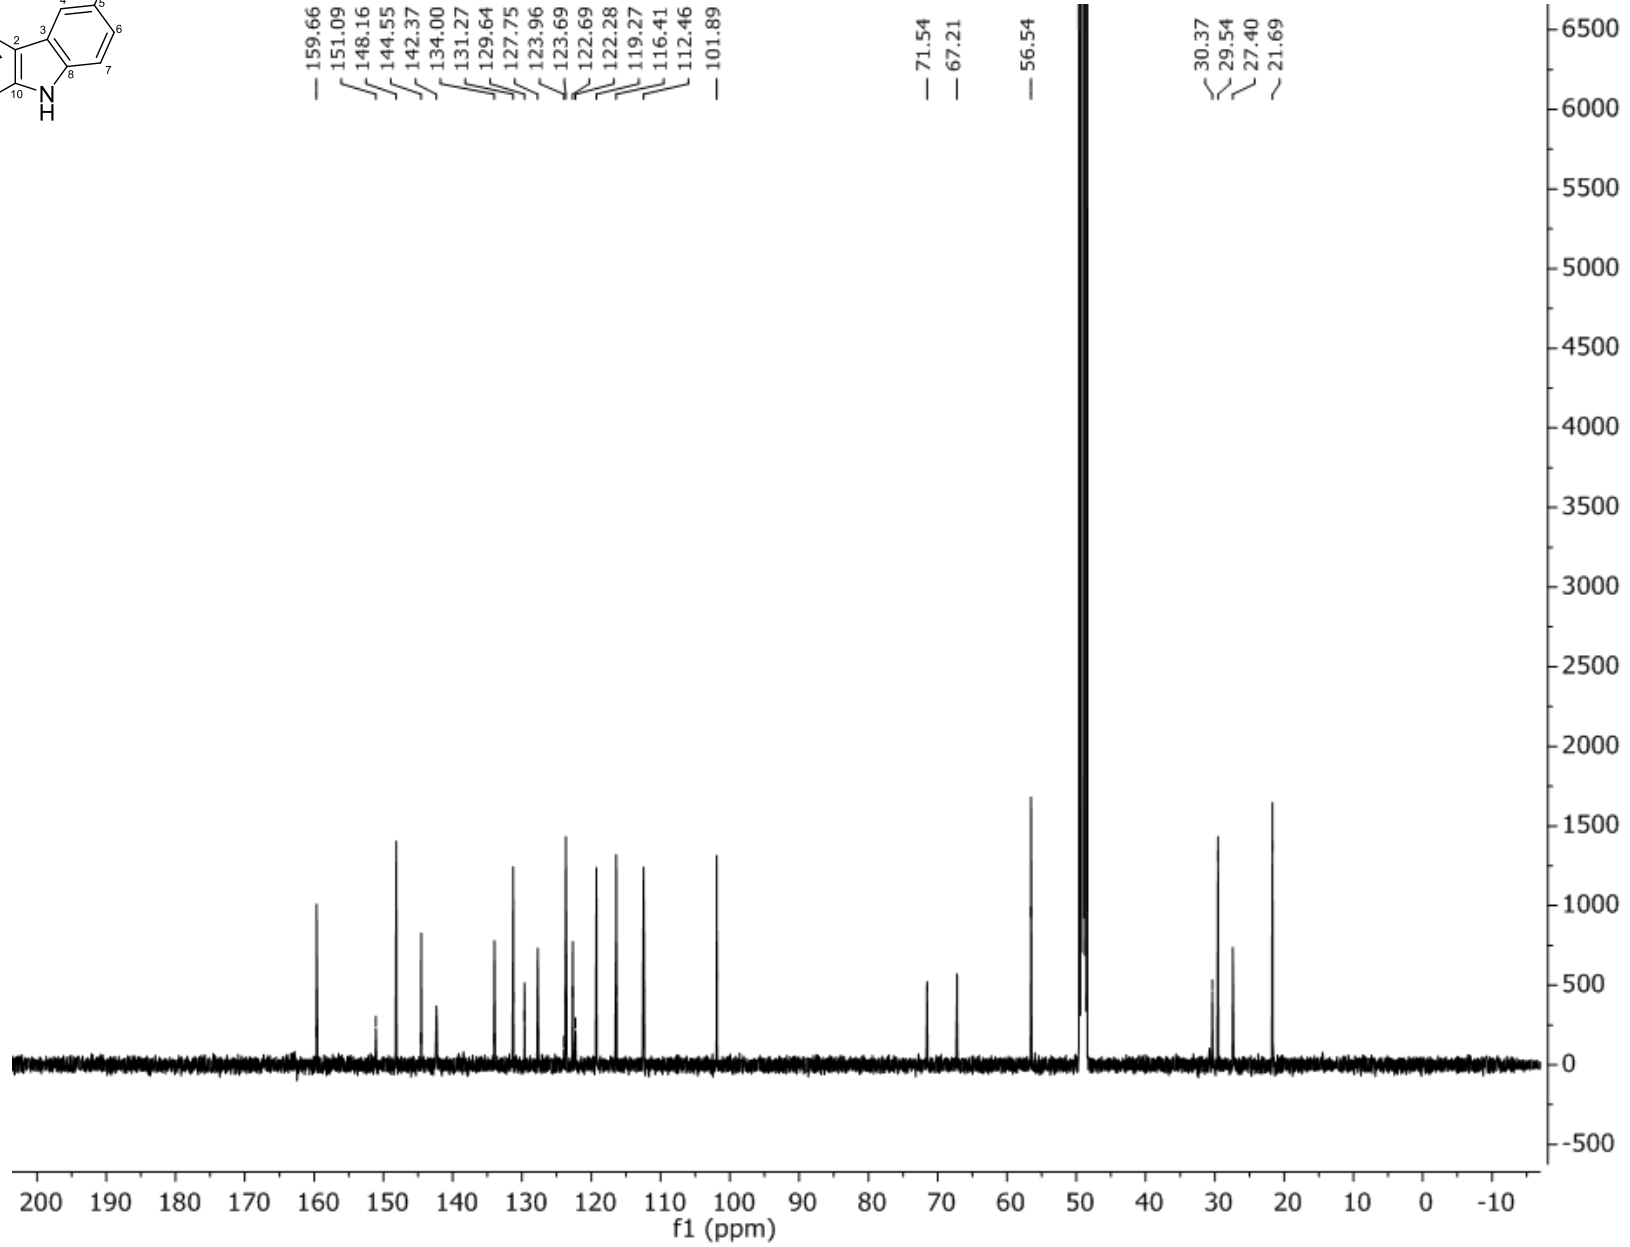

218

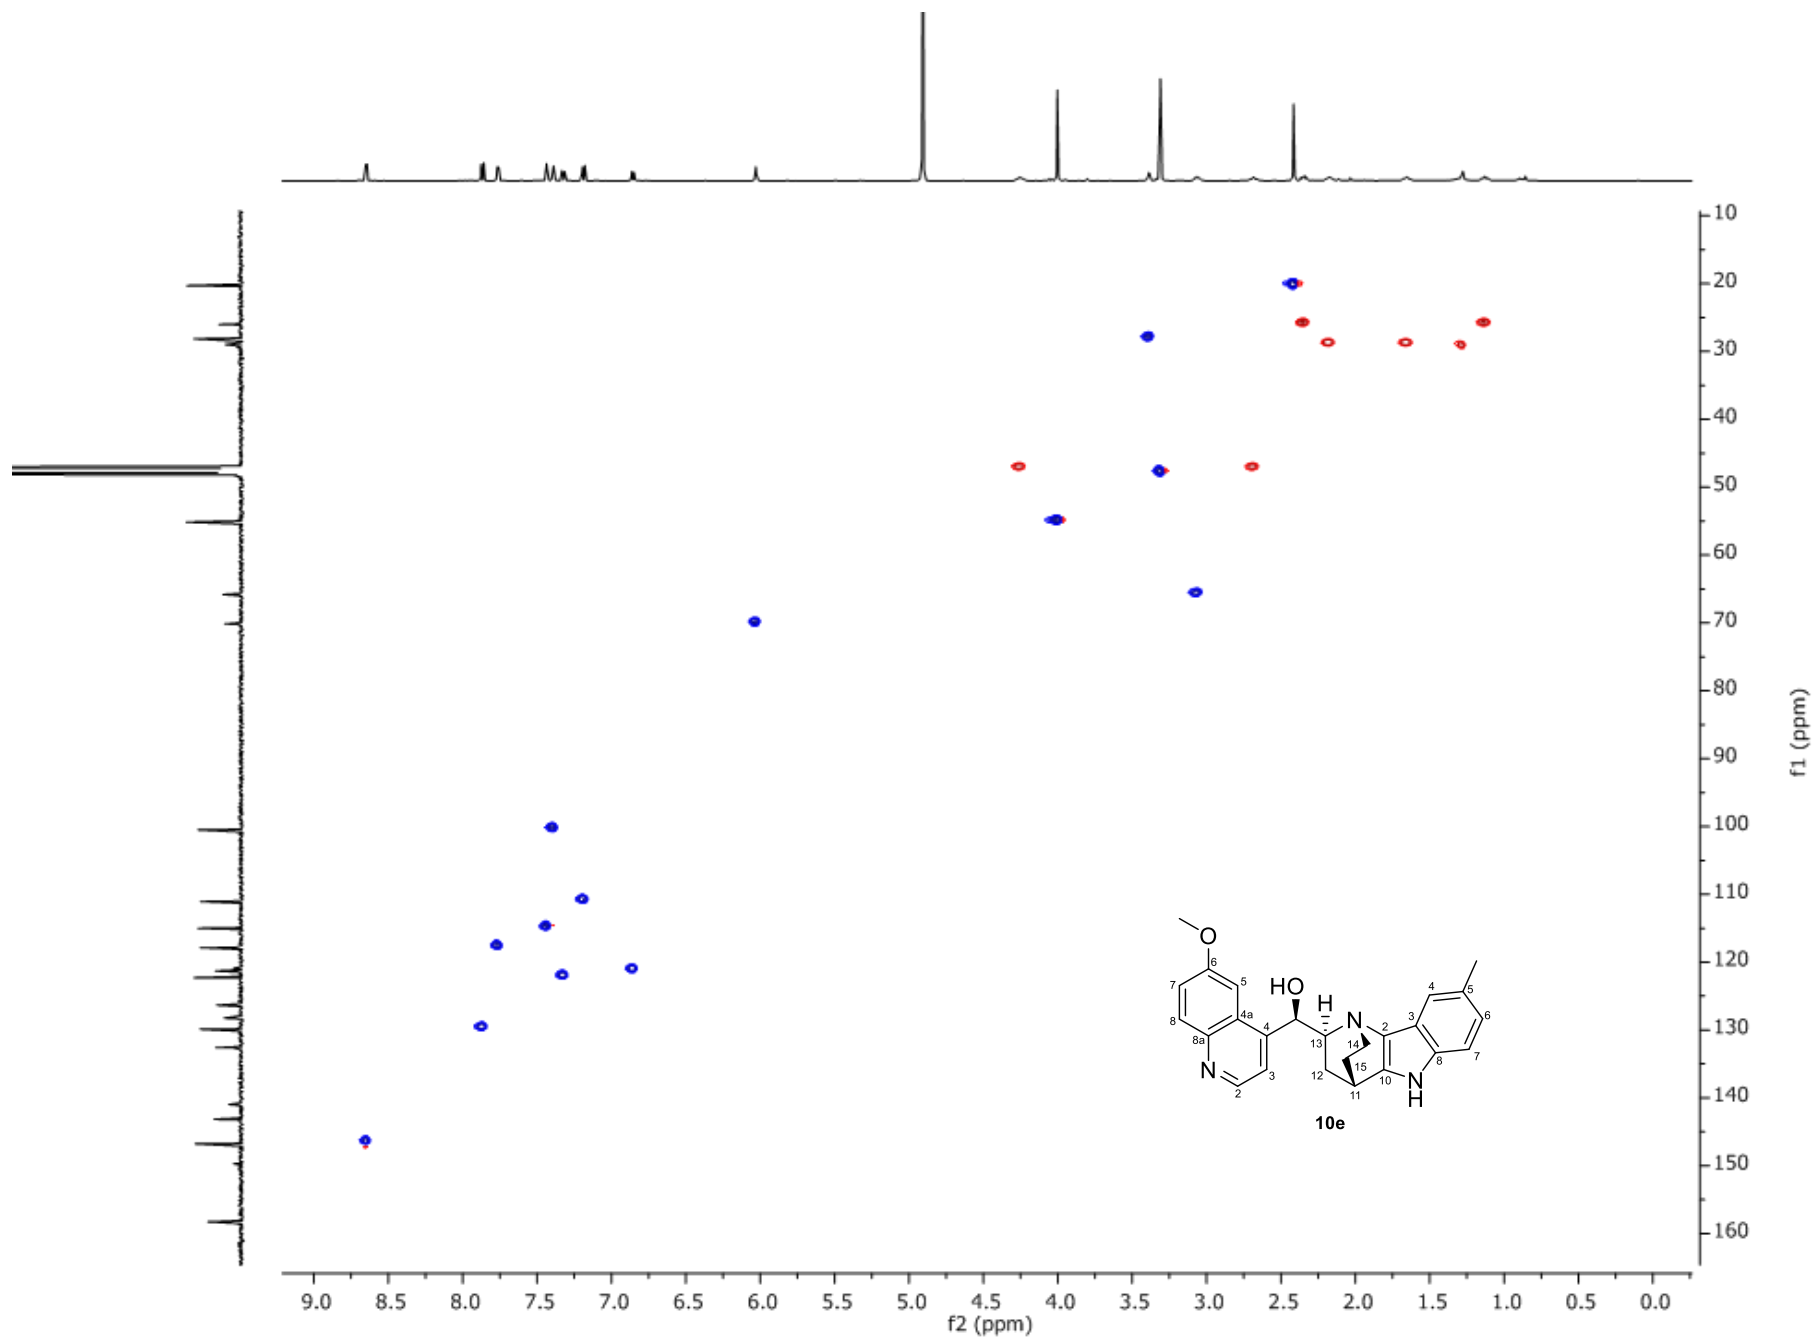

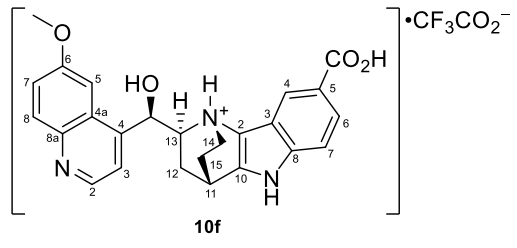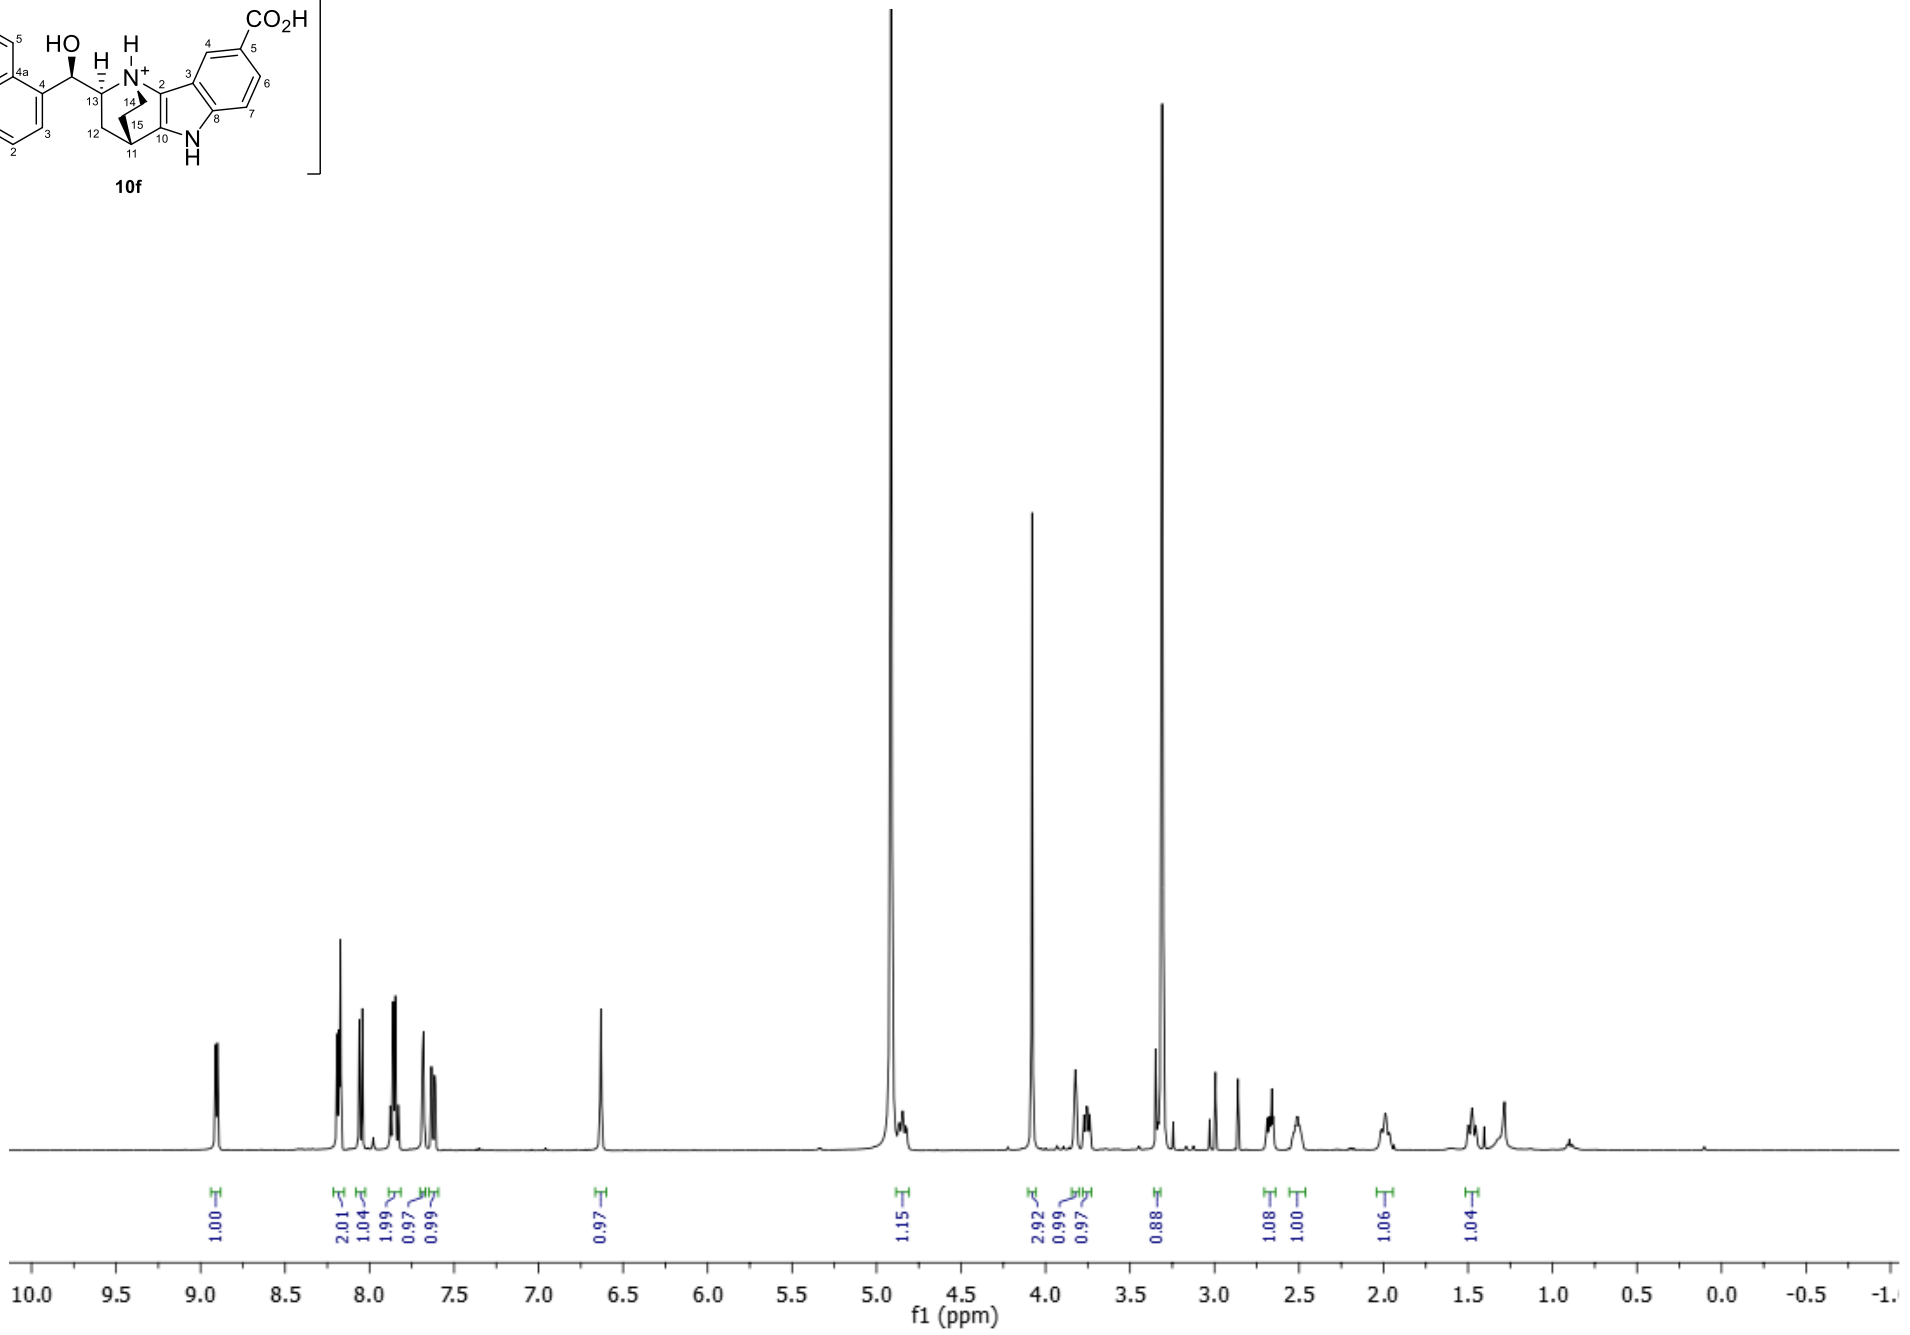

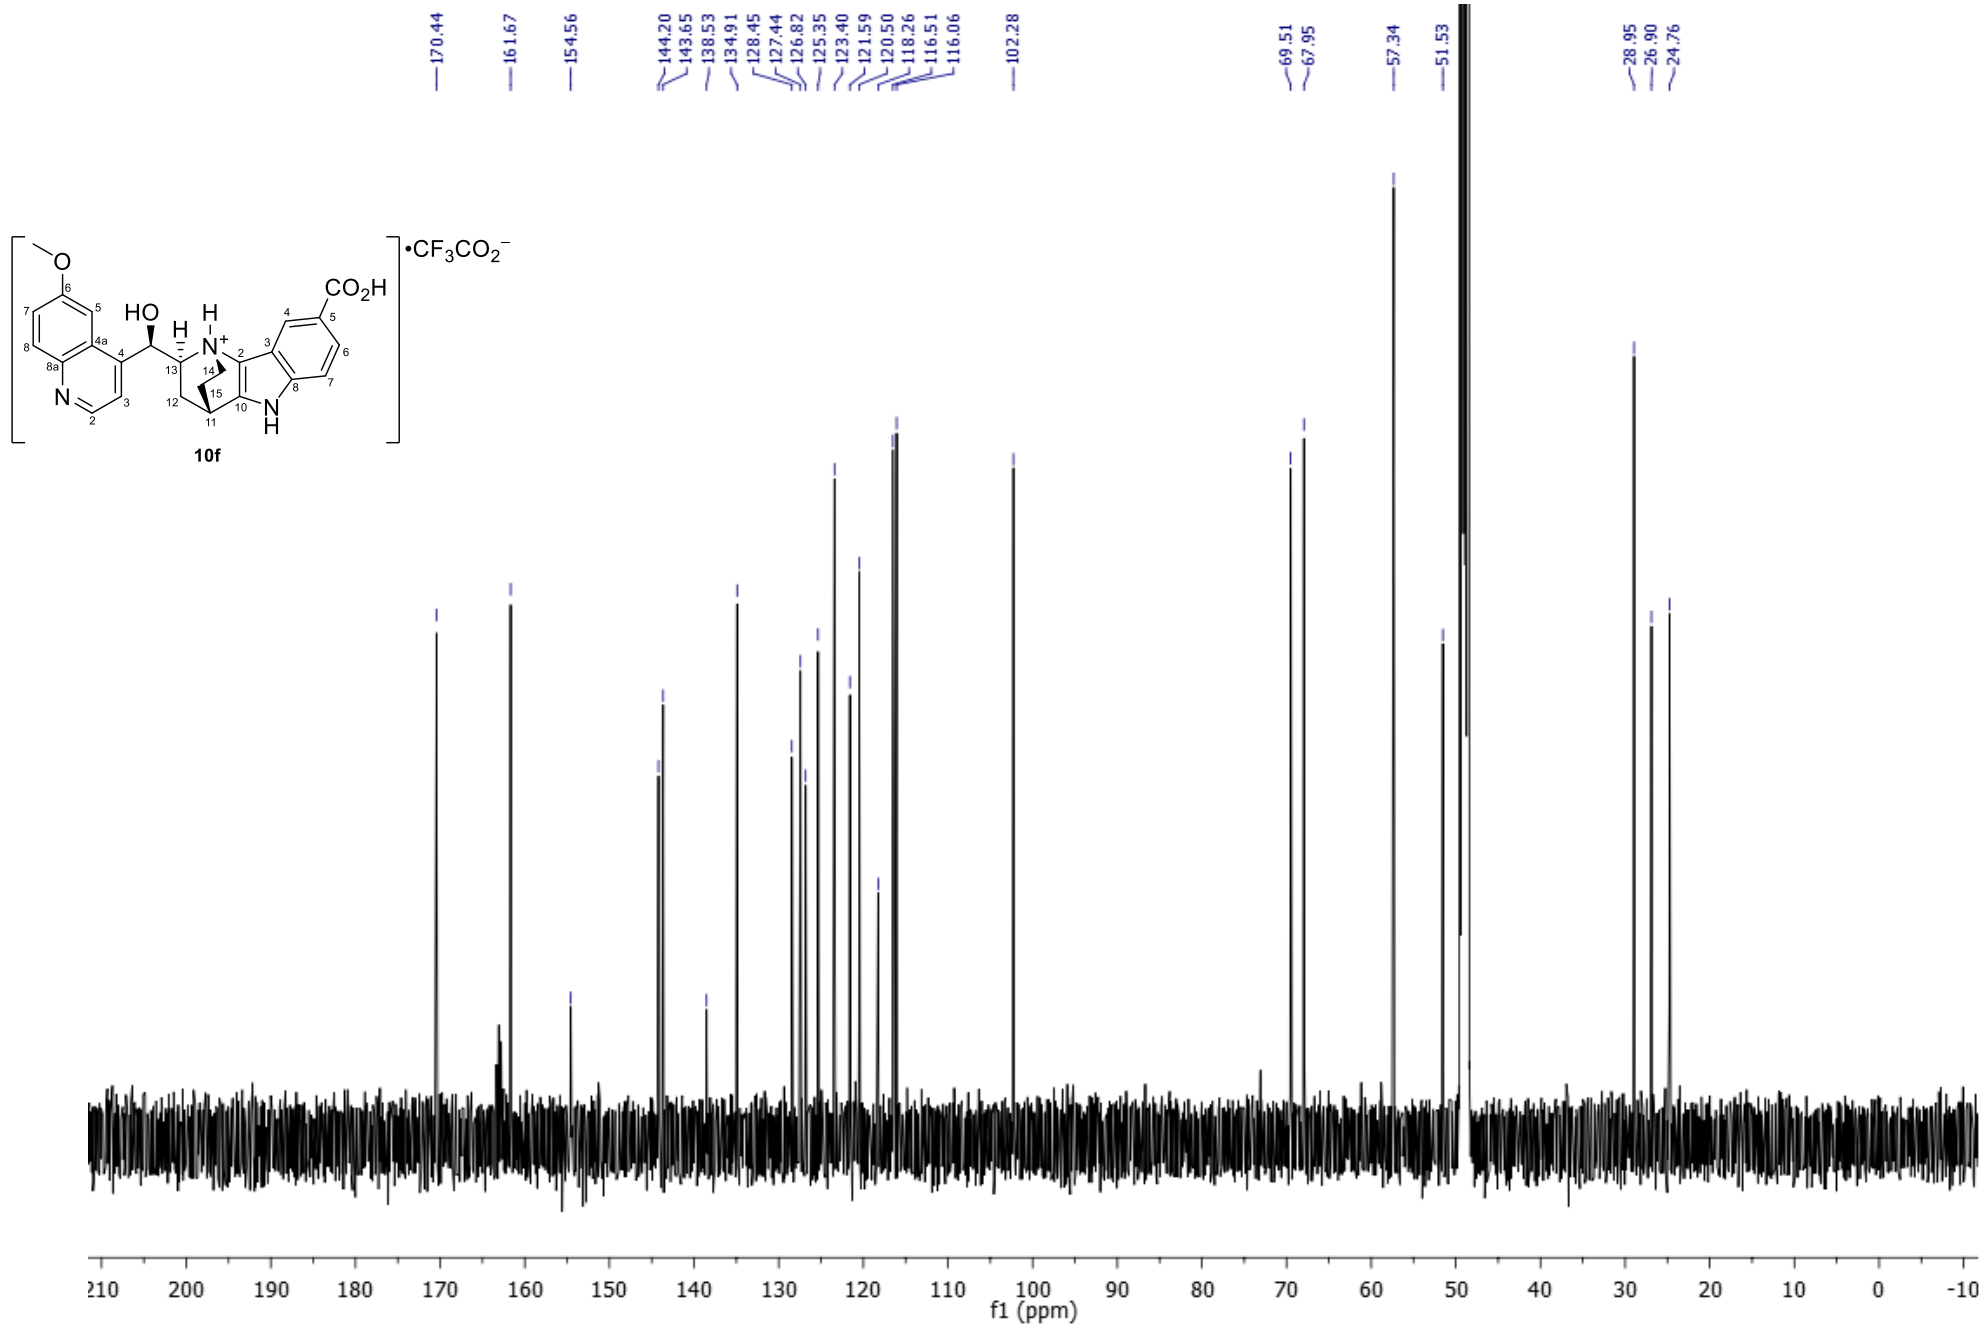

221

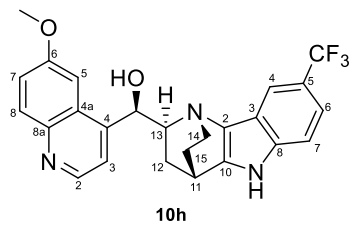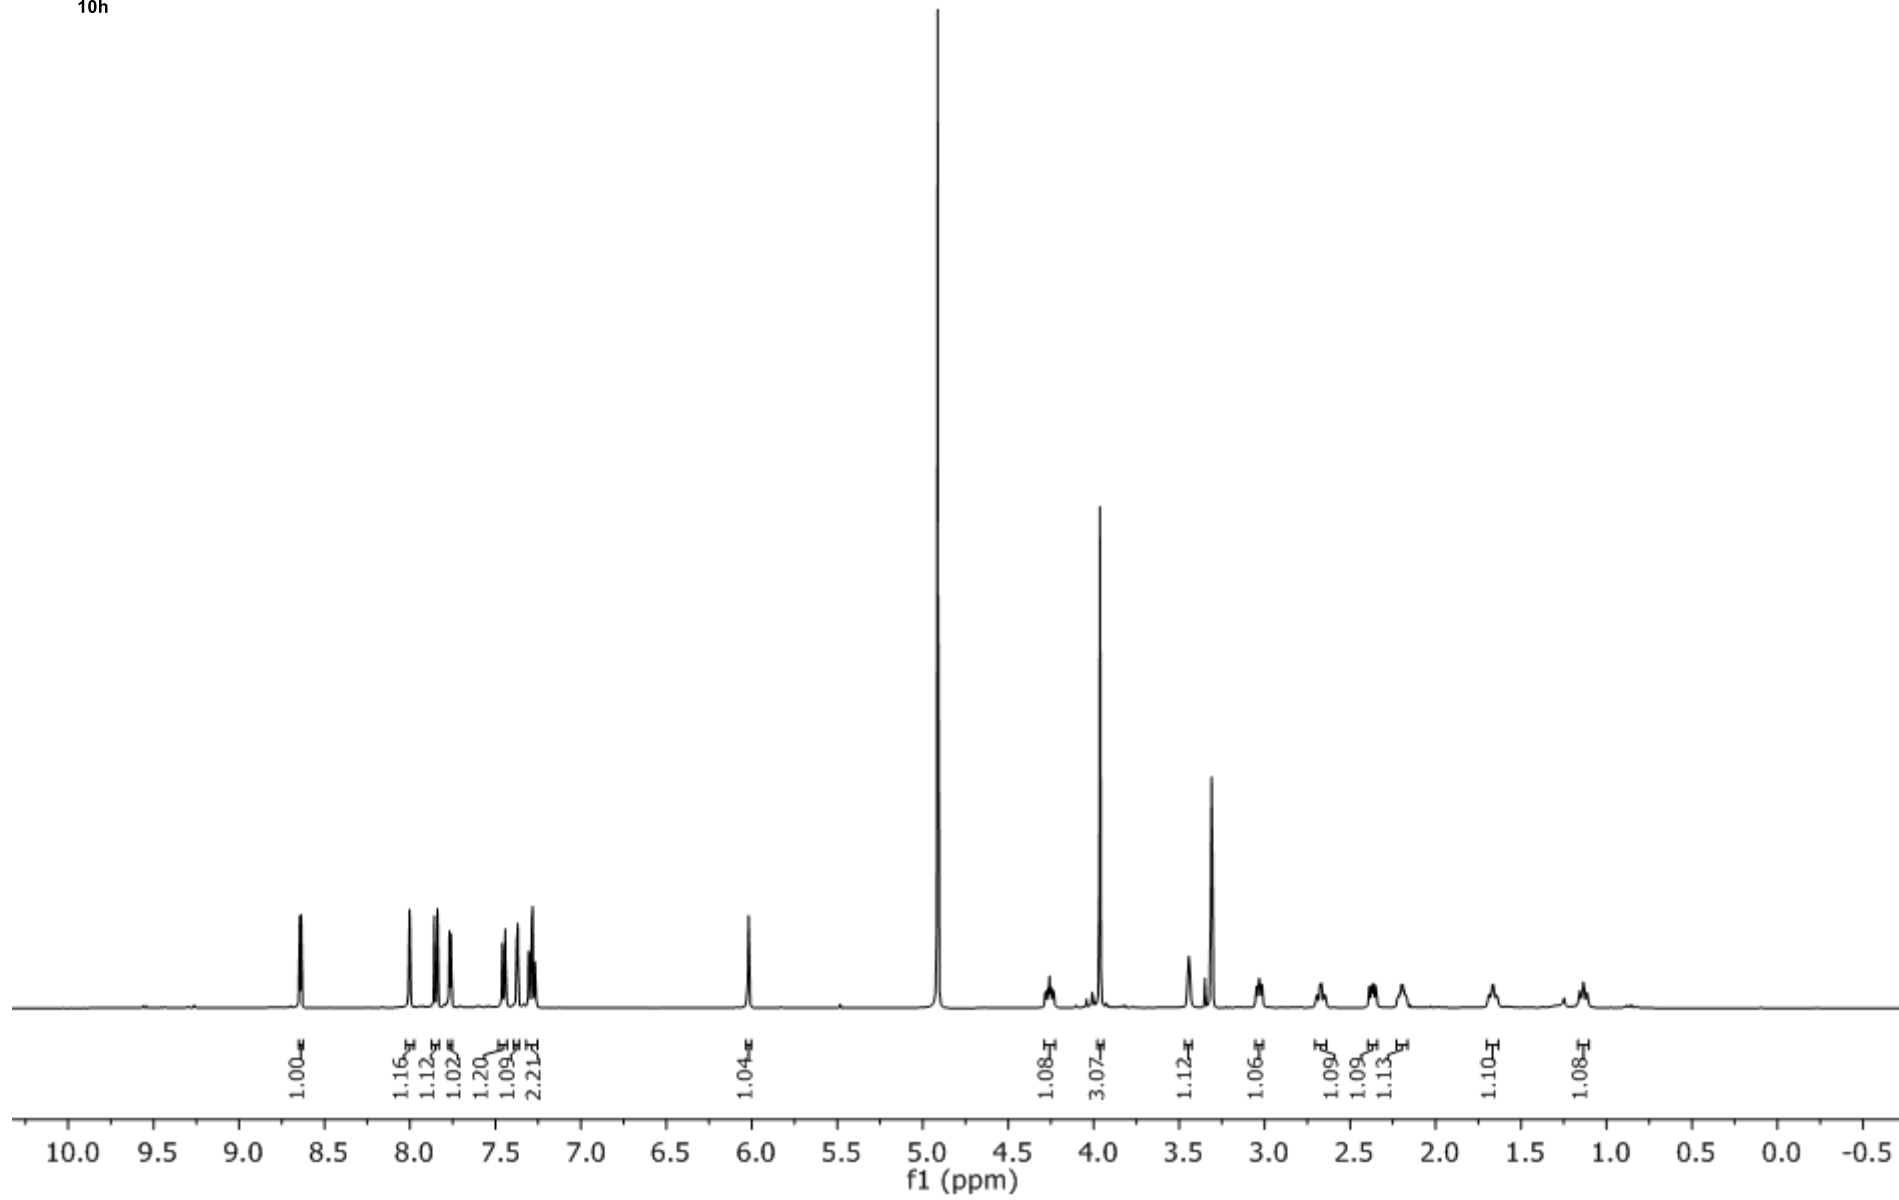

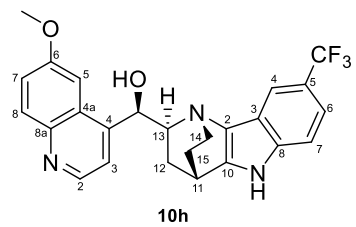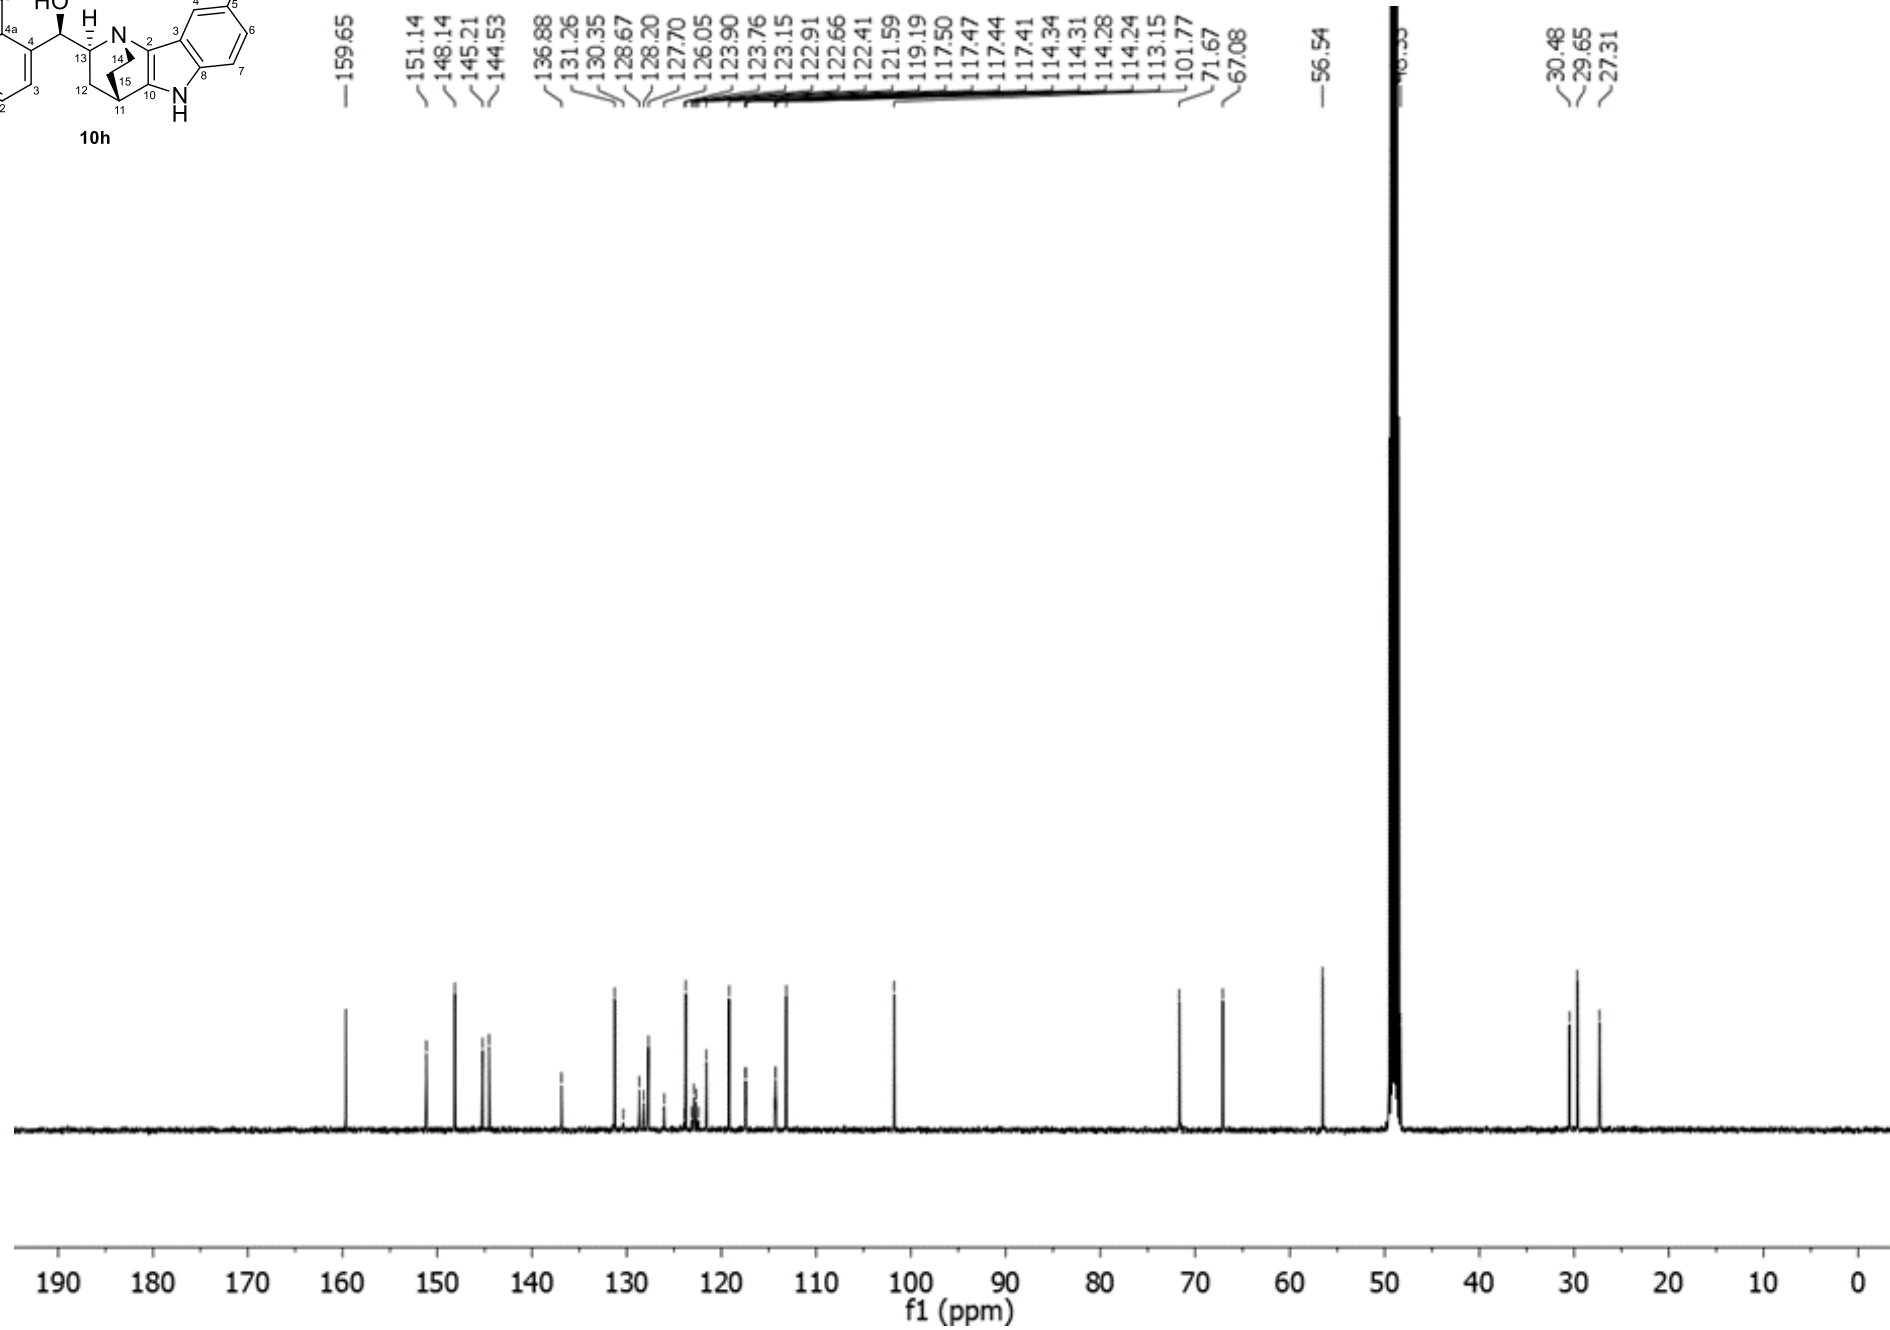

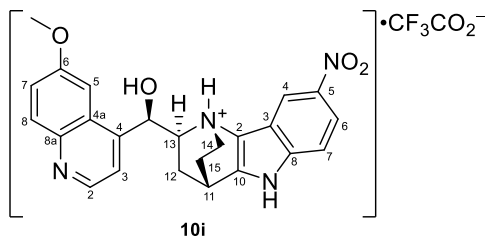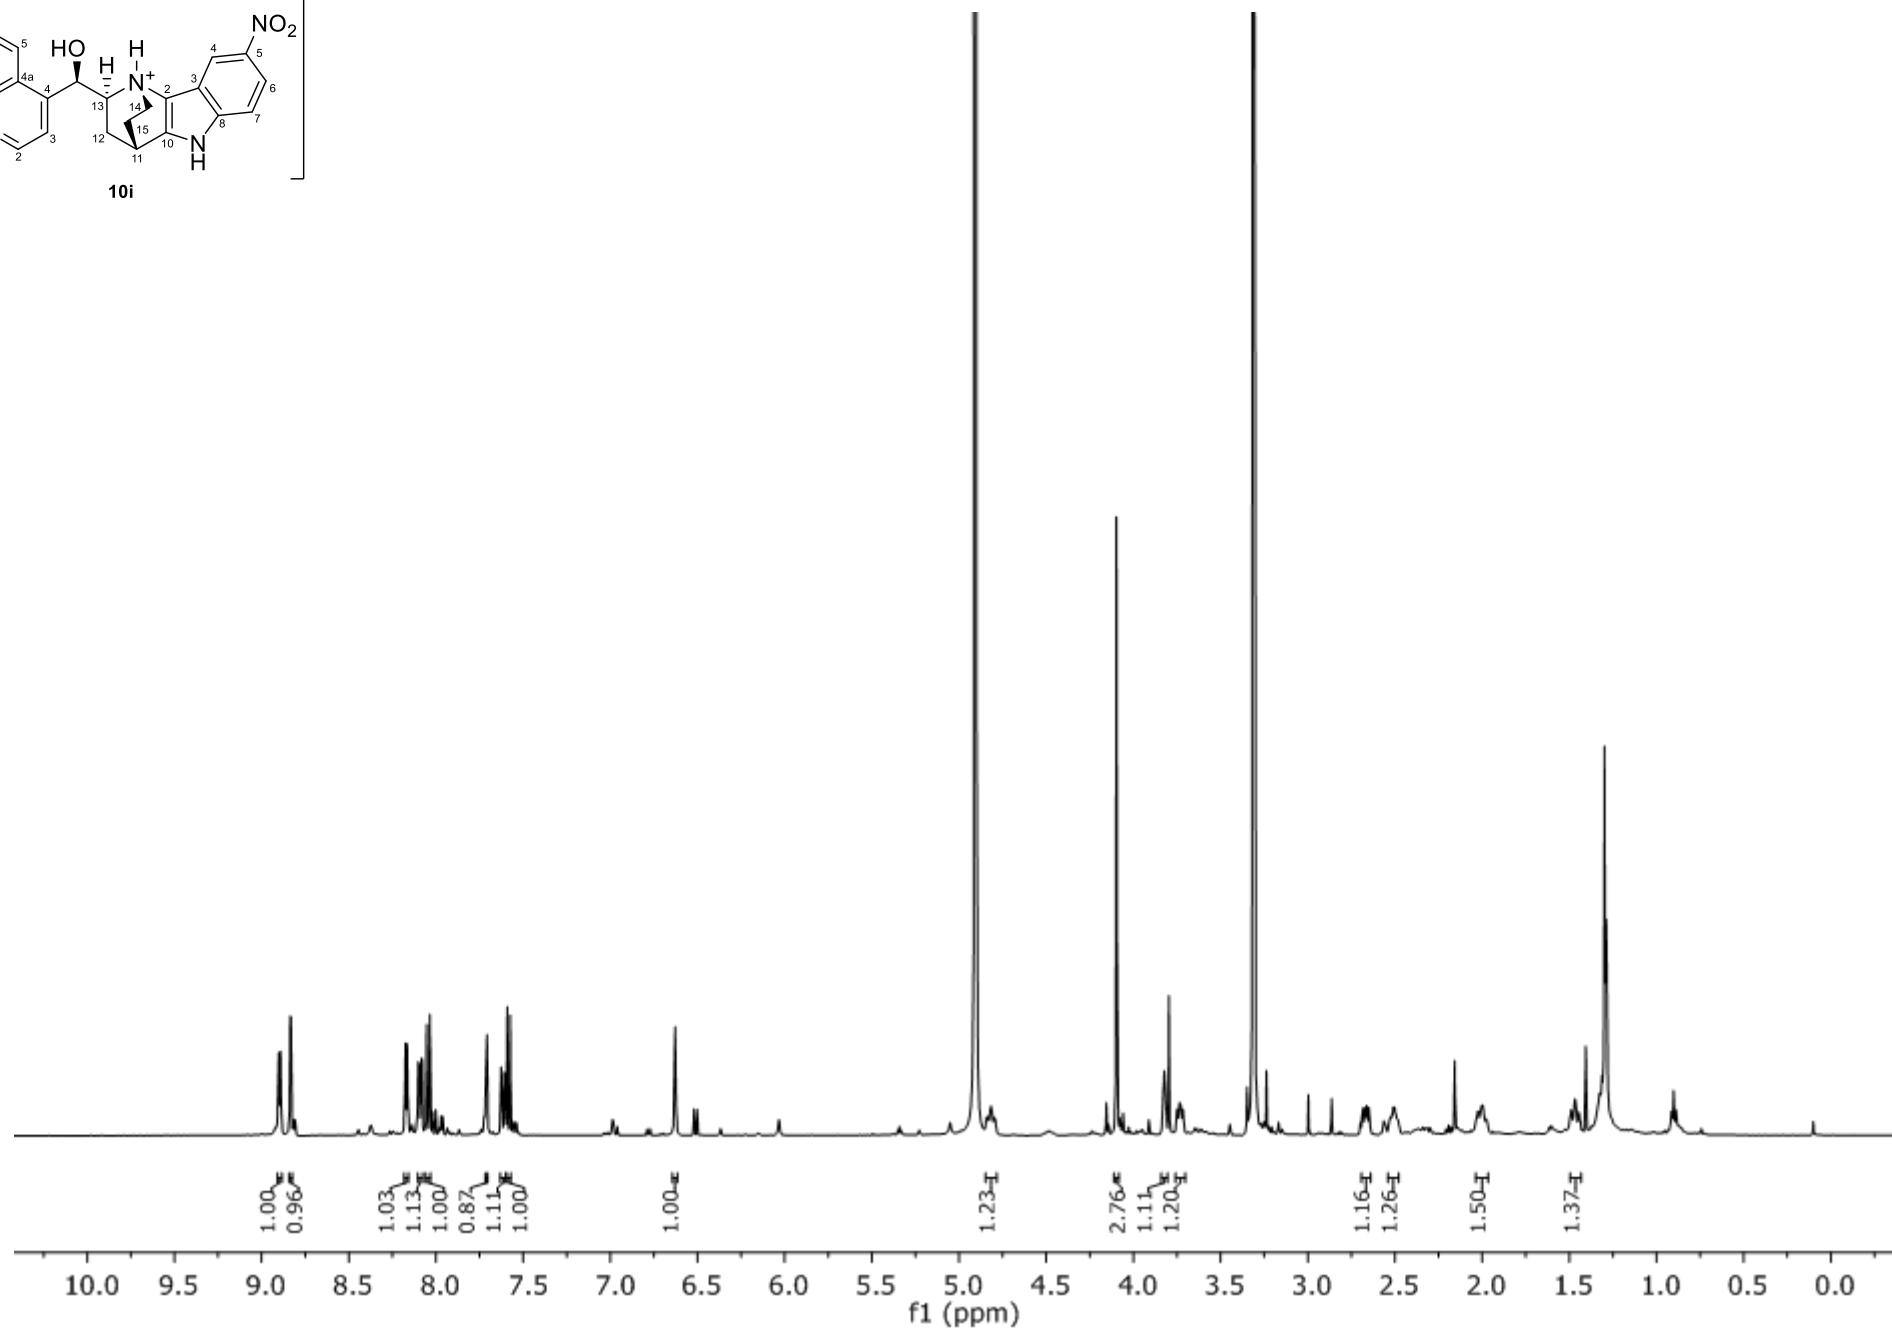



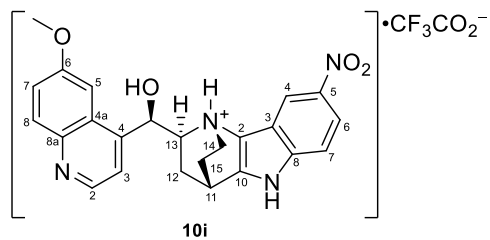

163.35  
163.07  
162.83  
162.53  
161.62  
144.57  
144.32  
143.95  
143.06  
140.53  
138.72  
138.45  
128.44  
127.34  
126.94  
120.43  
118.22  
118.15  
114.23  
113.84  
— 102.43

69.50  
68.13

— 57.41

— 51.15

29.07  
27.13  
24.93

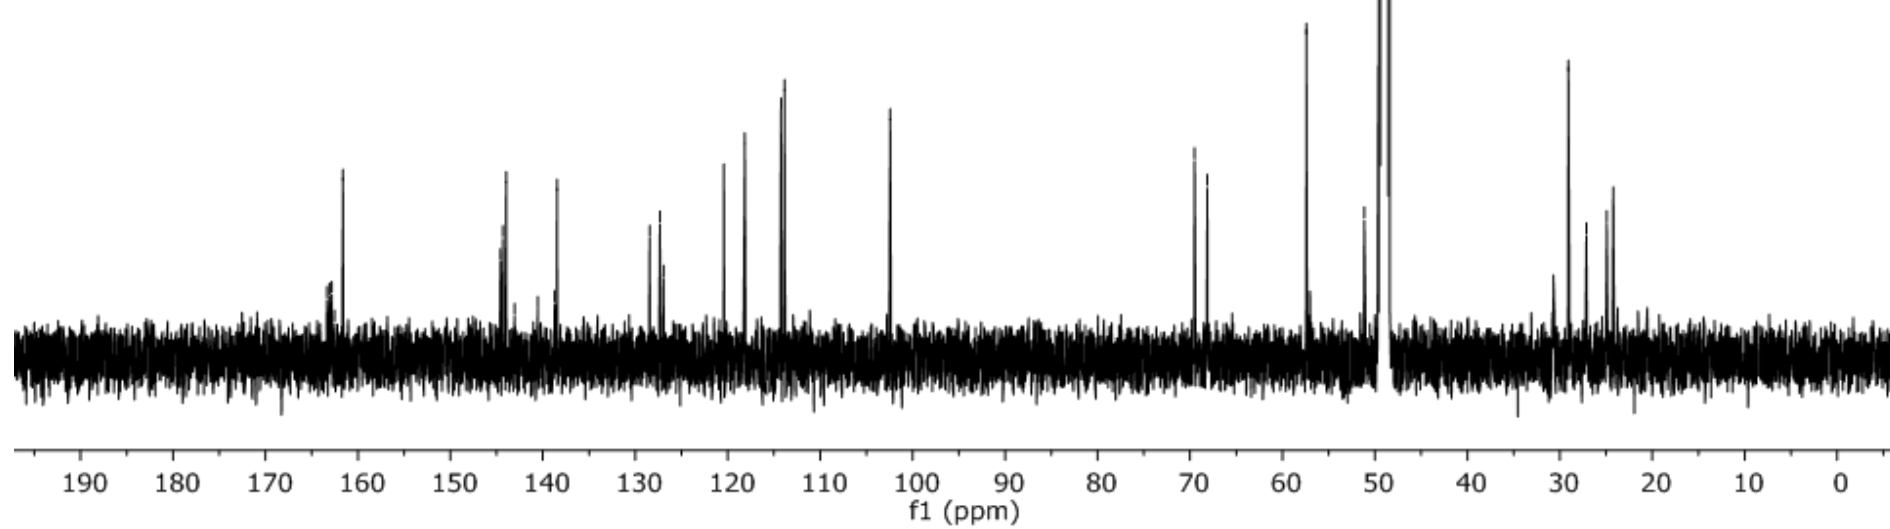

225

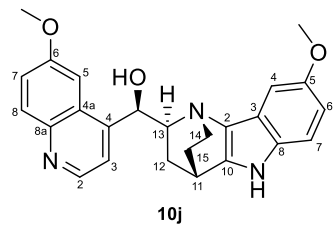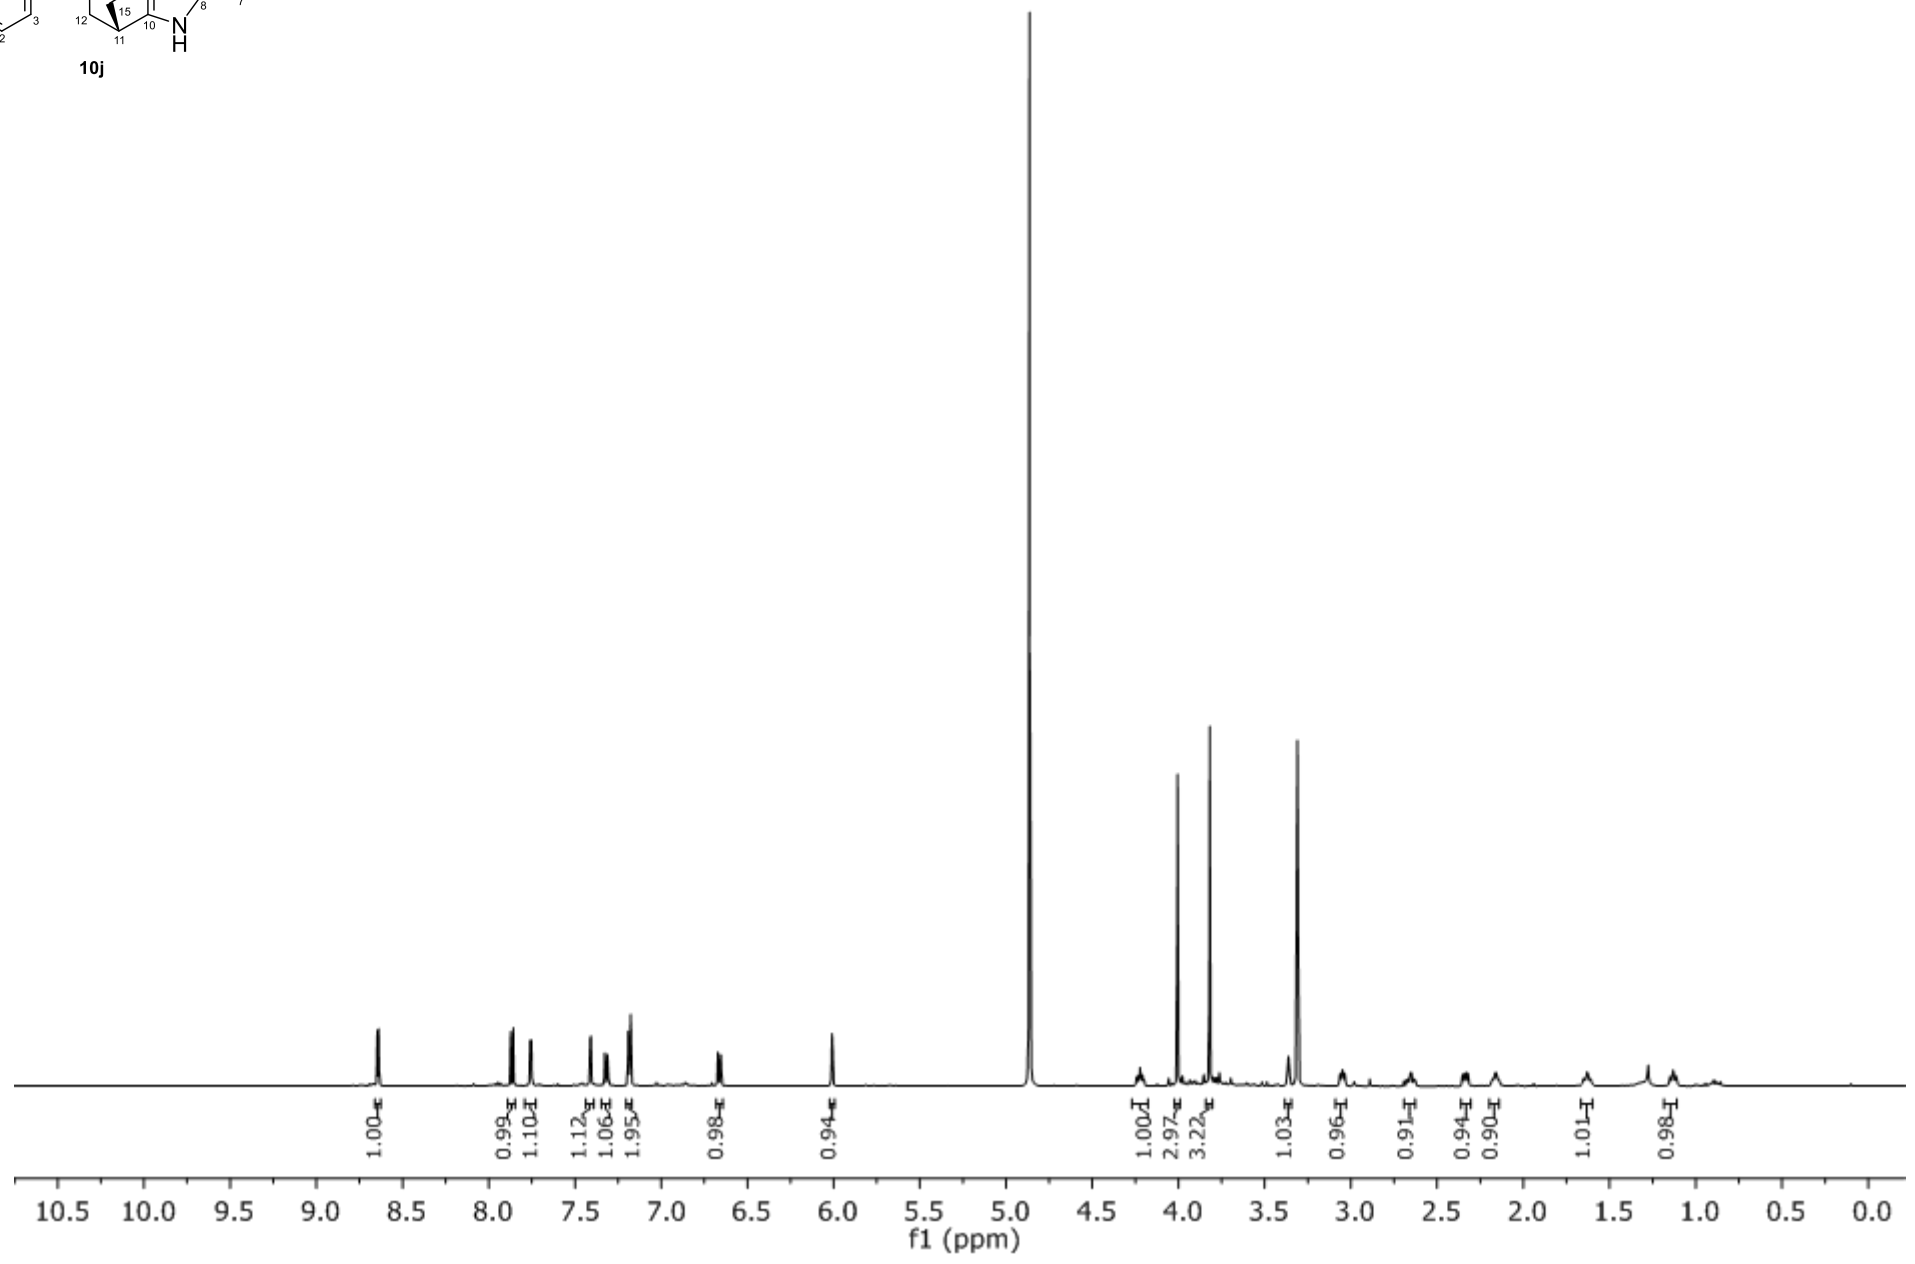

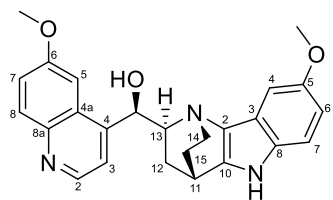

10j

159.65  
155.64  
151.26  
148.17  
144.60  
143.24

131.28  
130.82  
127.91  
127.80  
123.65  
122.51  
119.28  
113.32  
110.93

101.98  
99.05

71.76  
67.01

56.70  
56.19

30.47  
29.65  
27.59

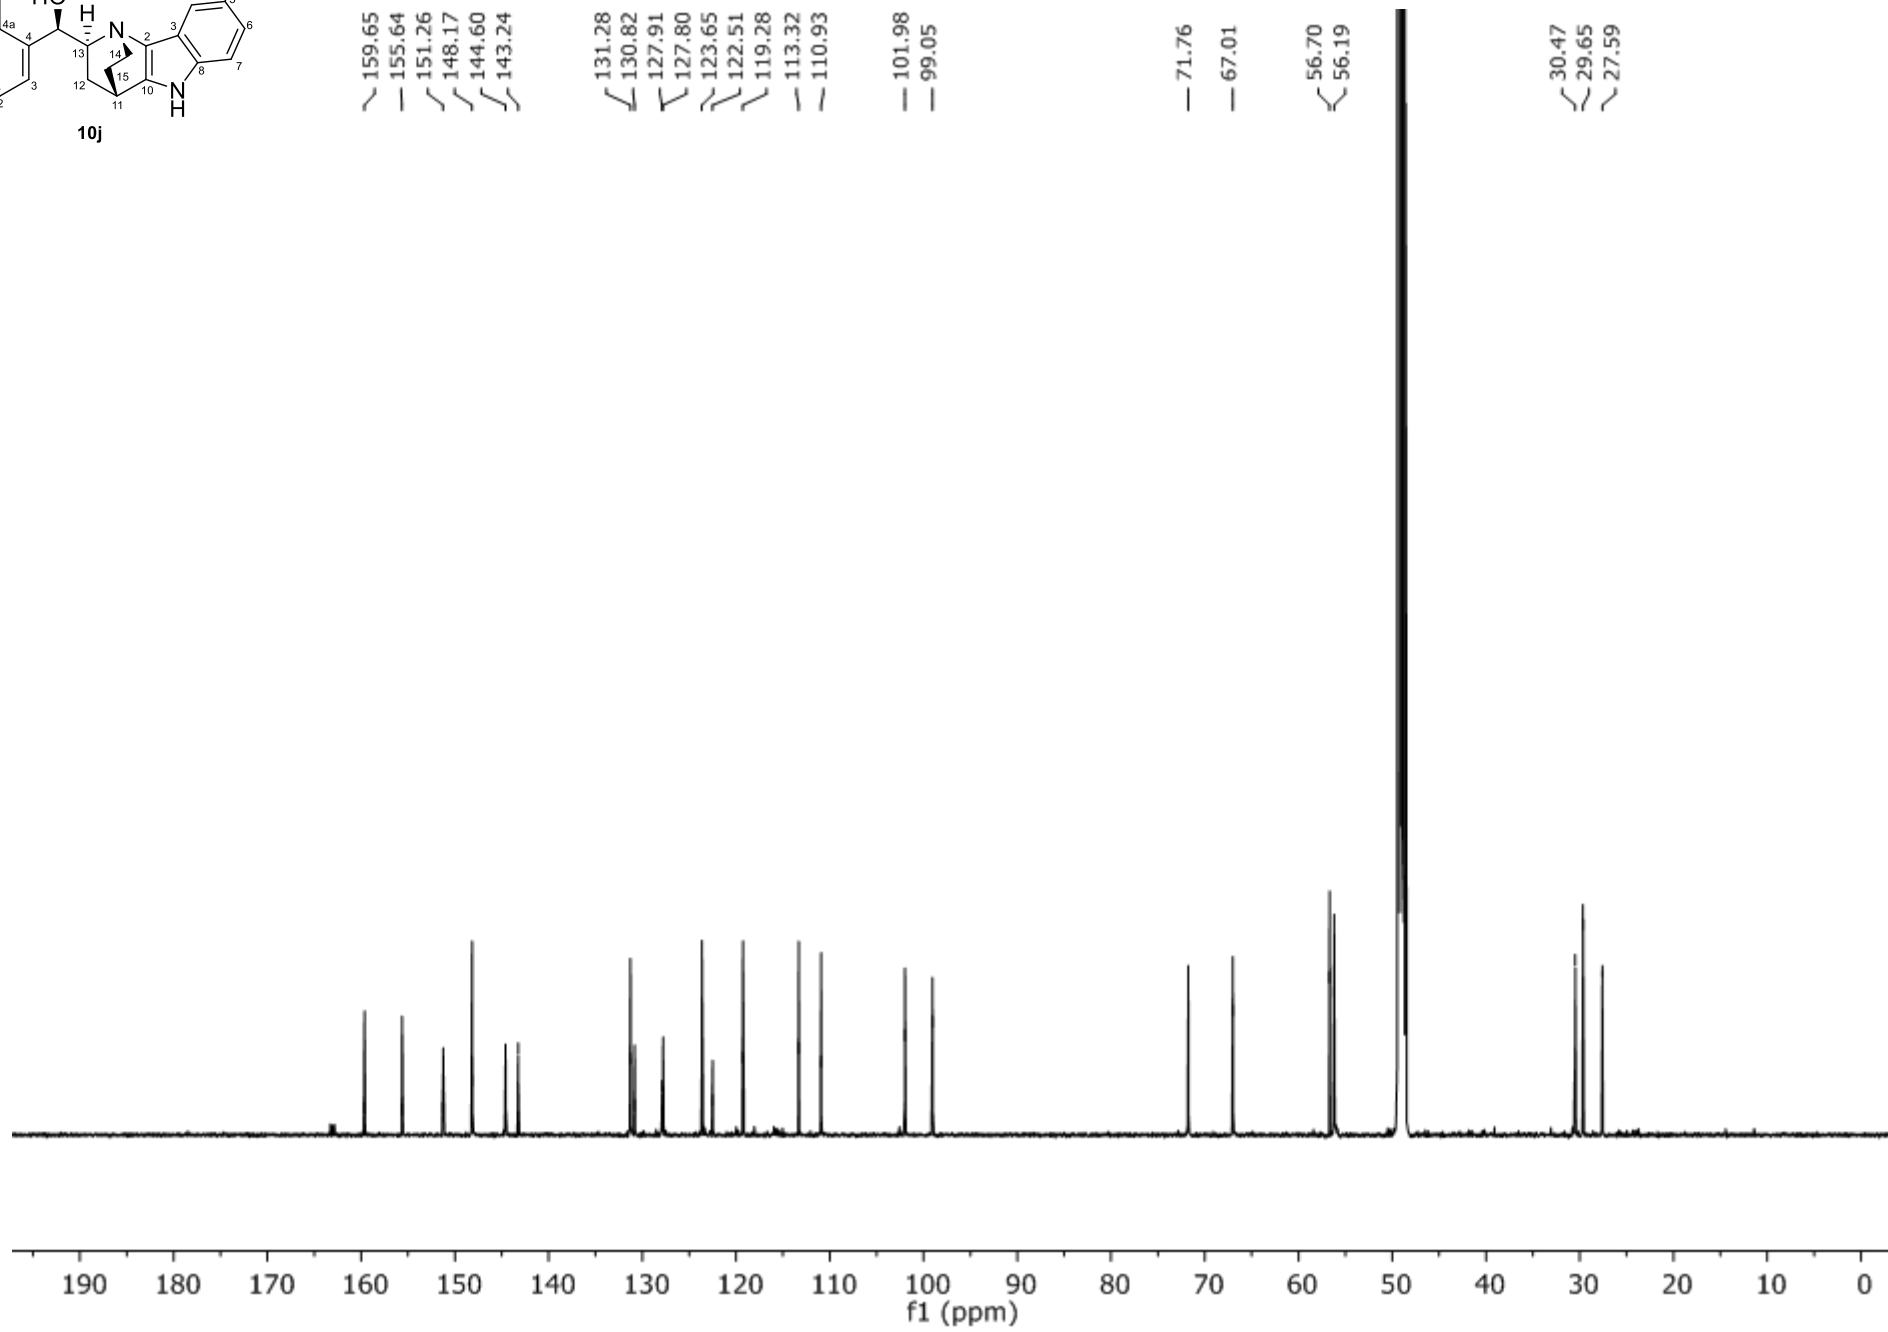

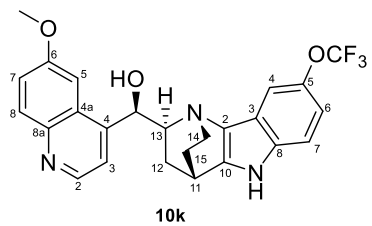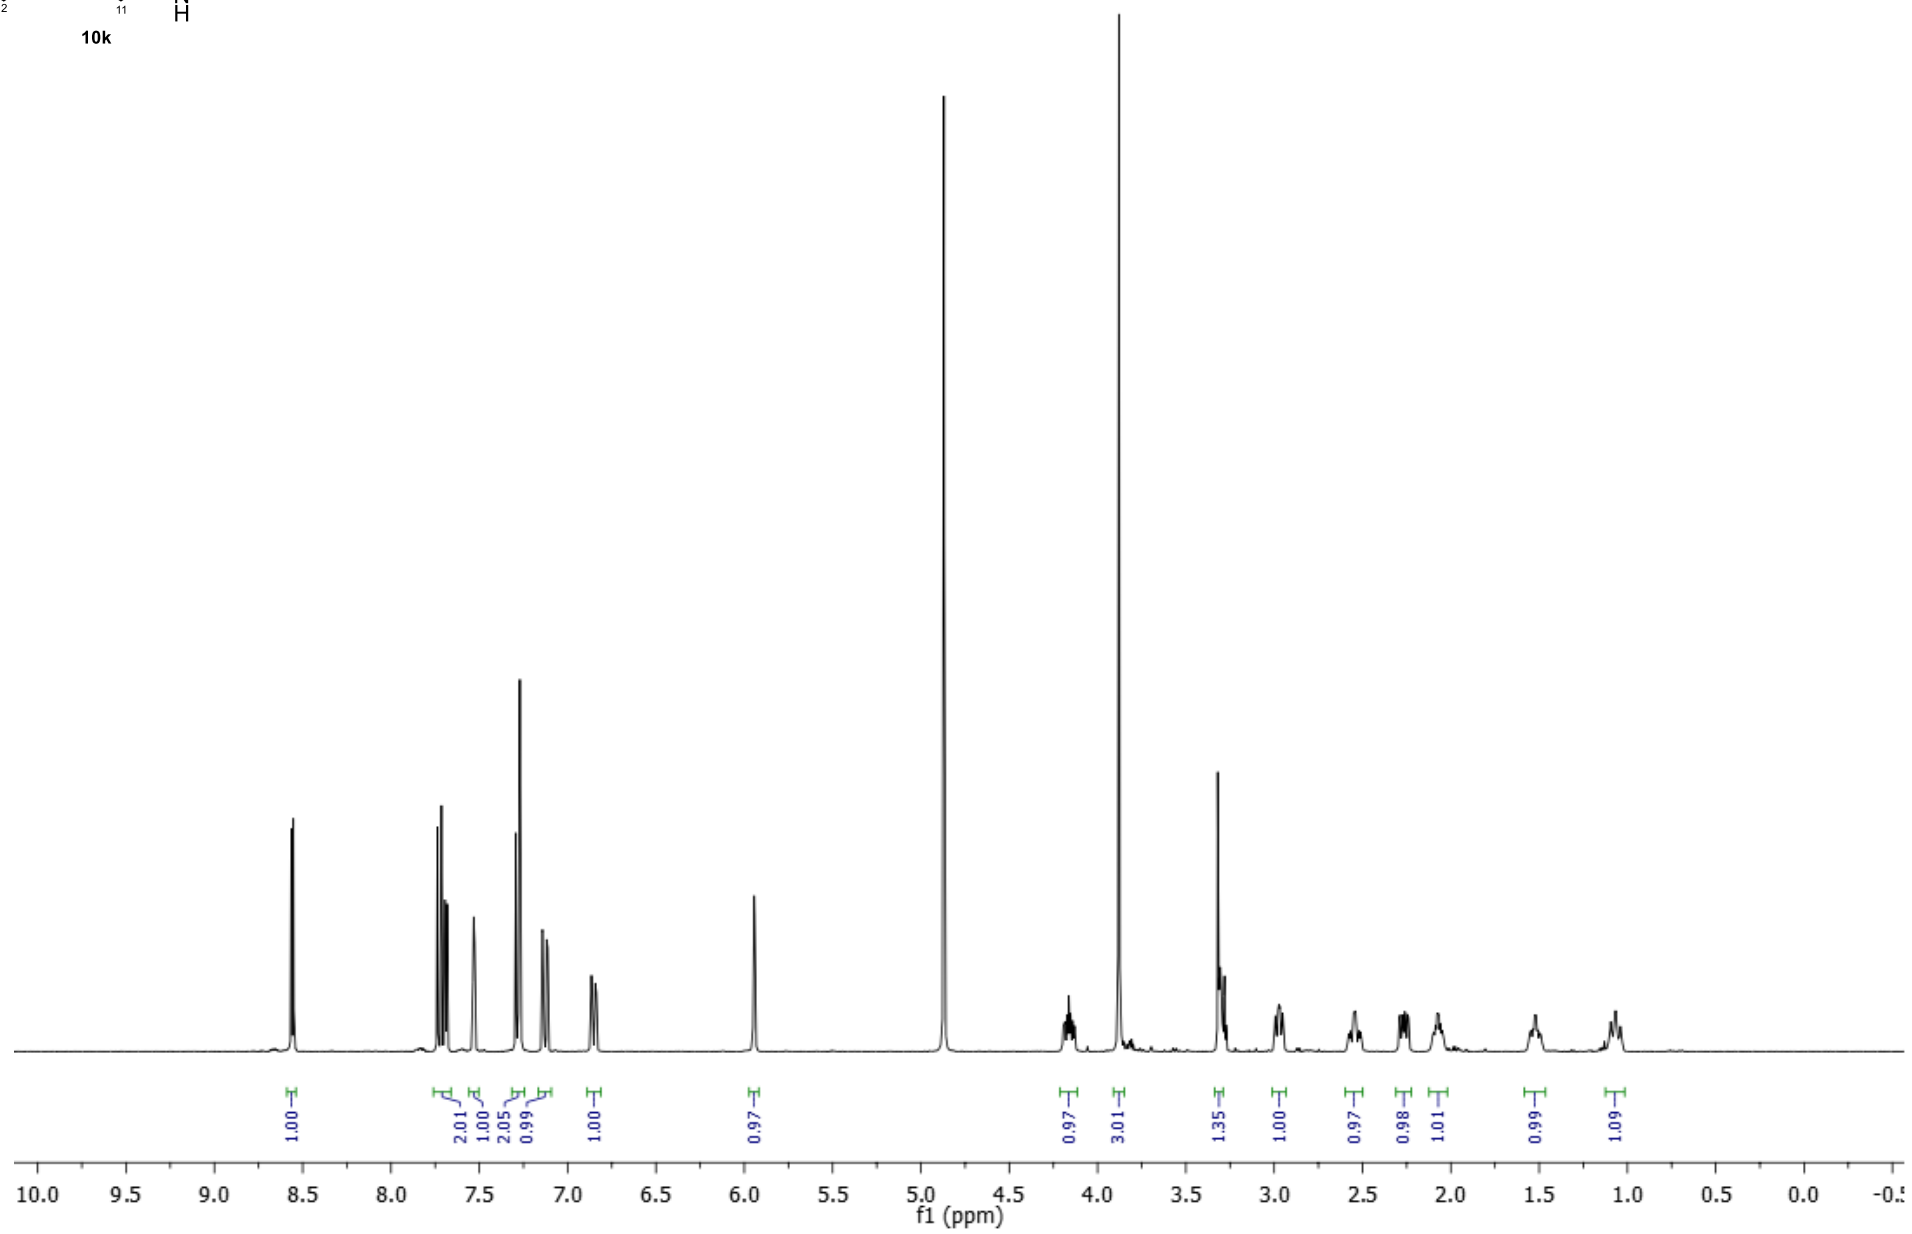

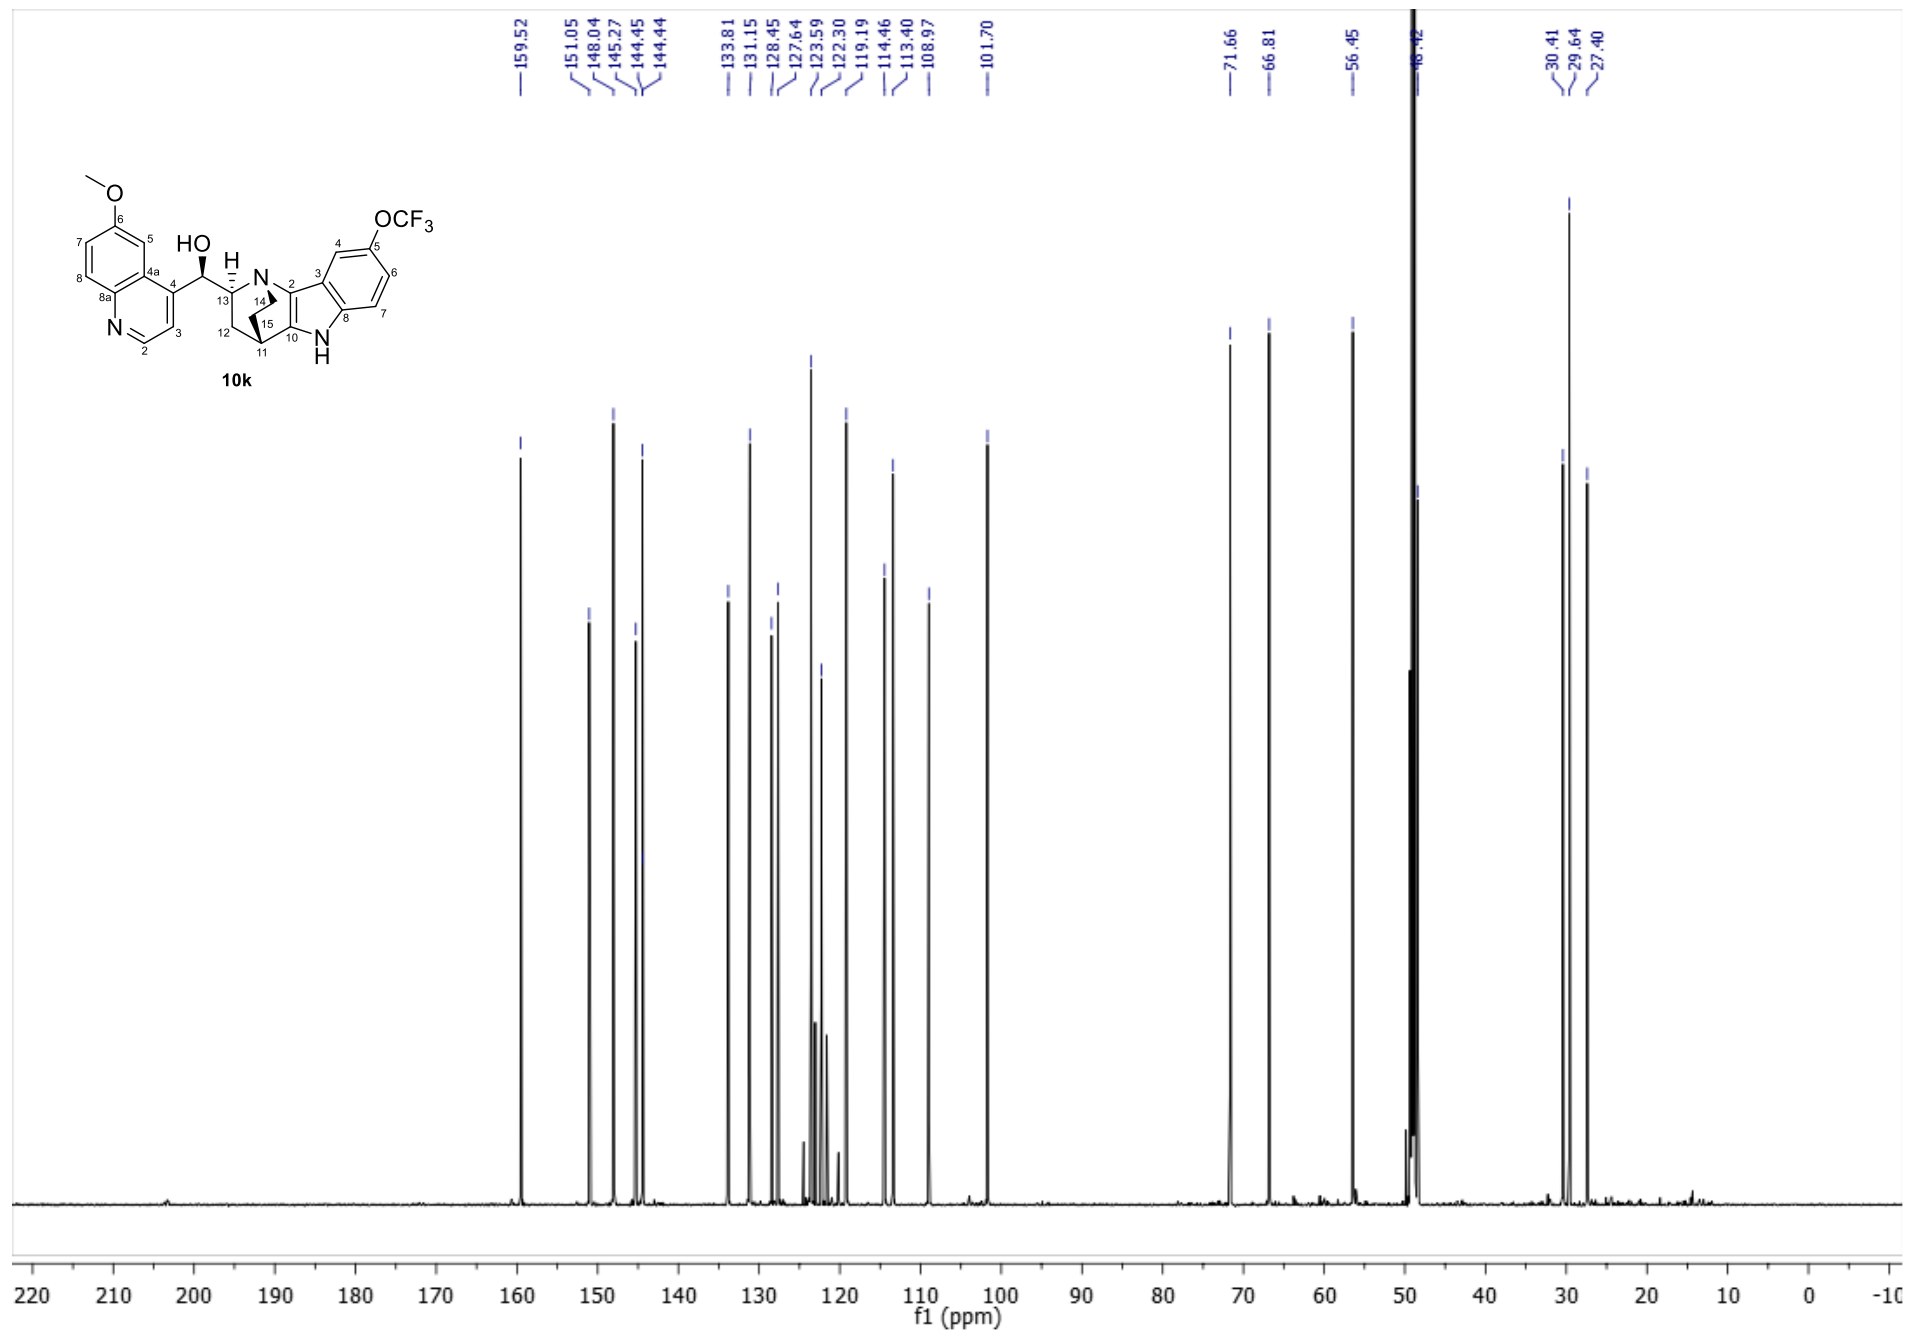

229

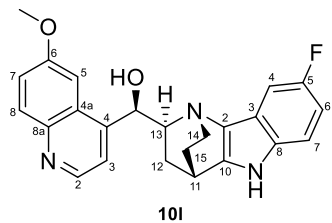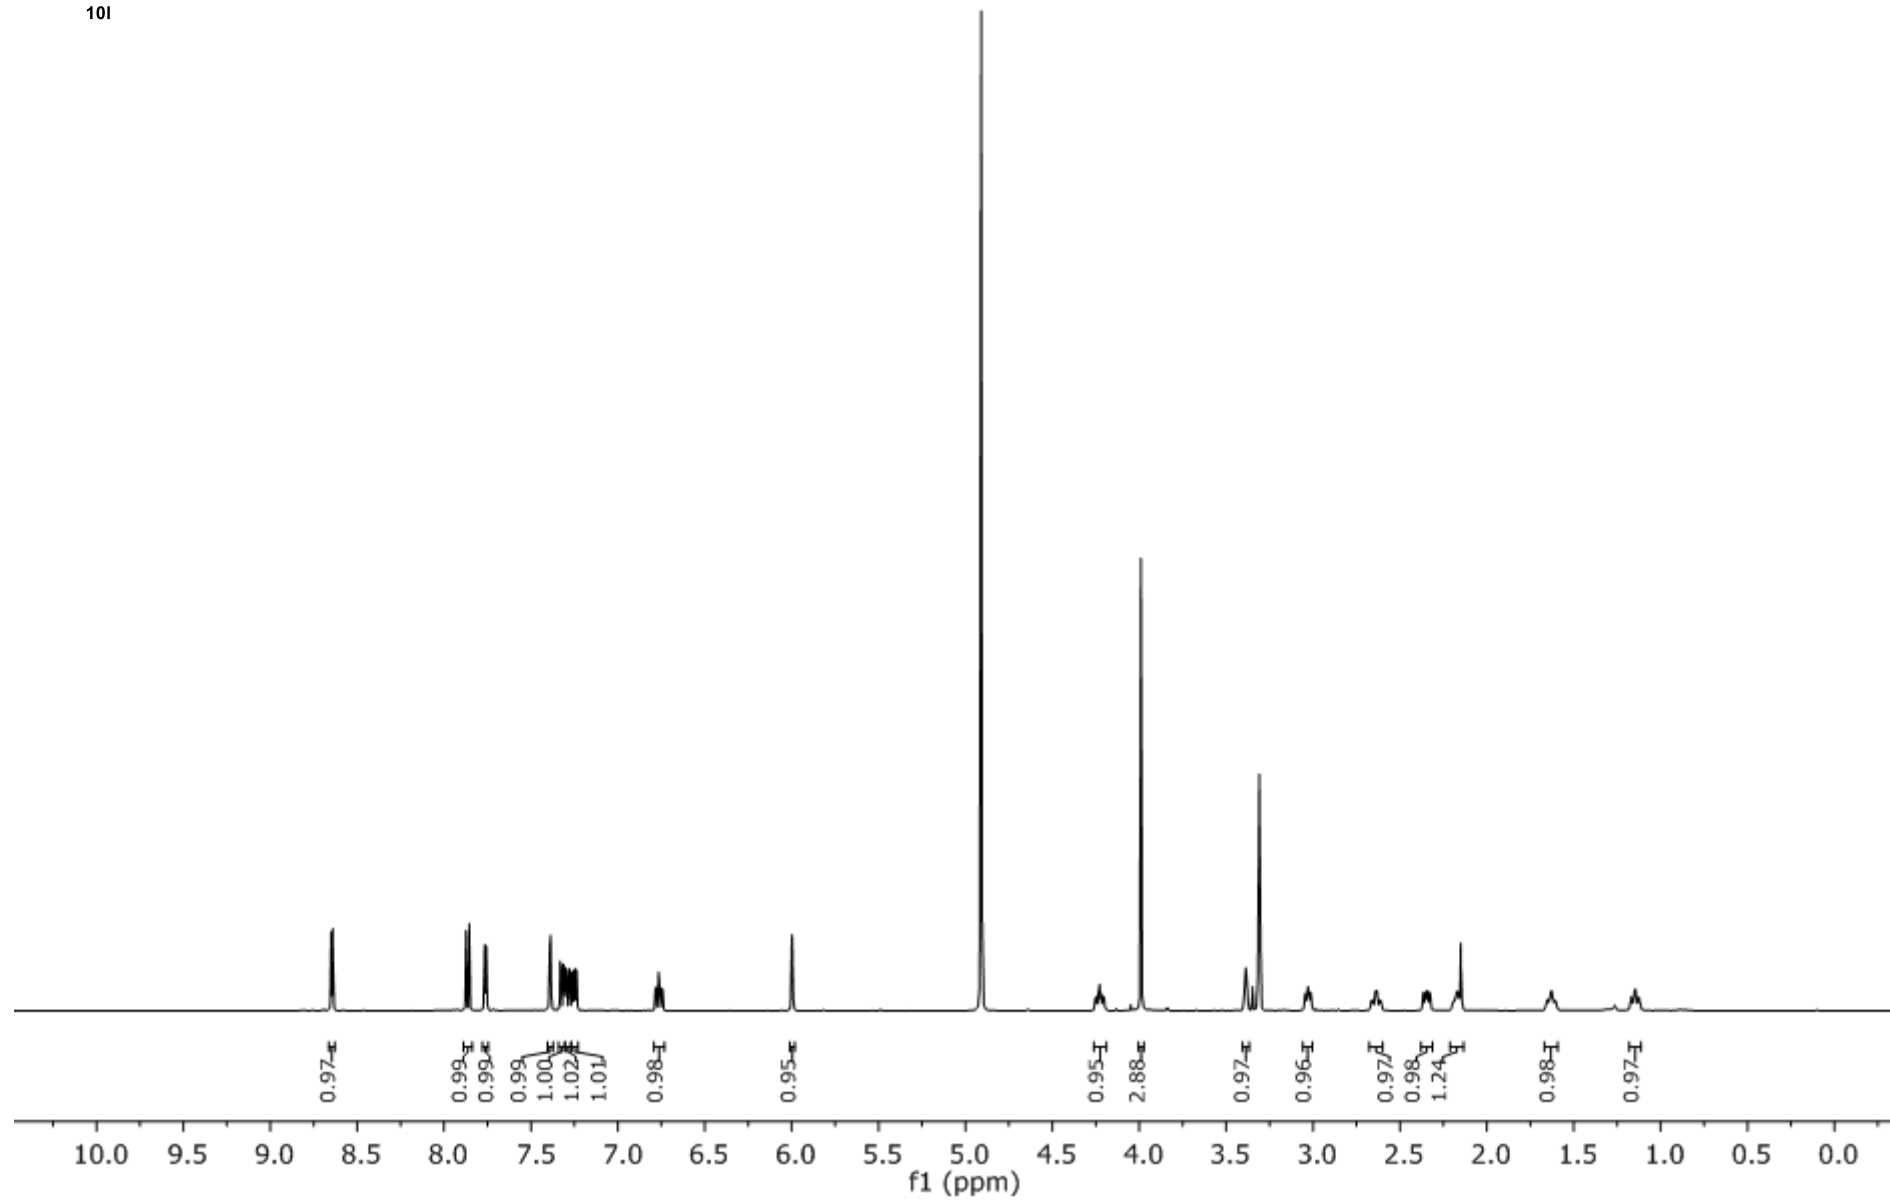

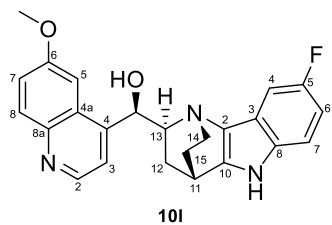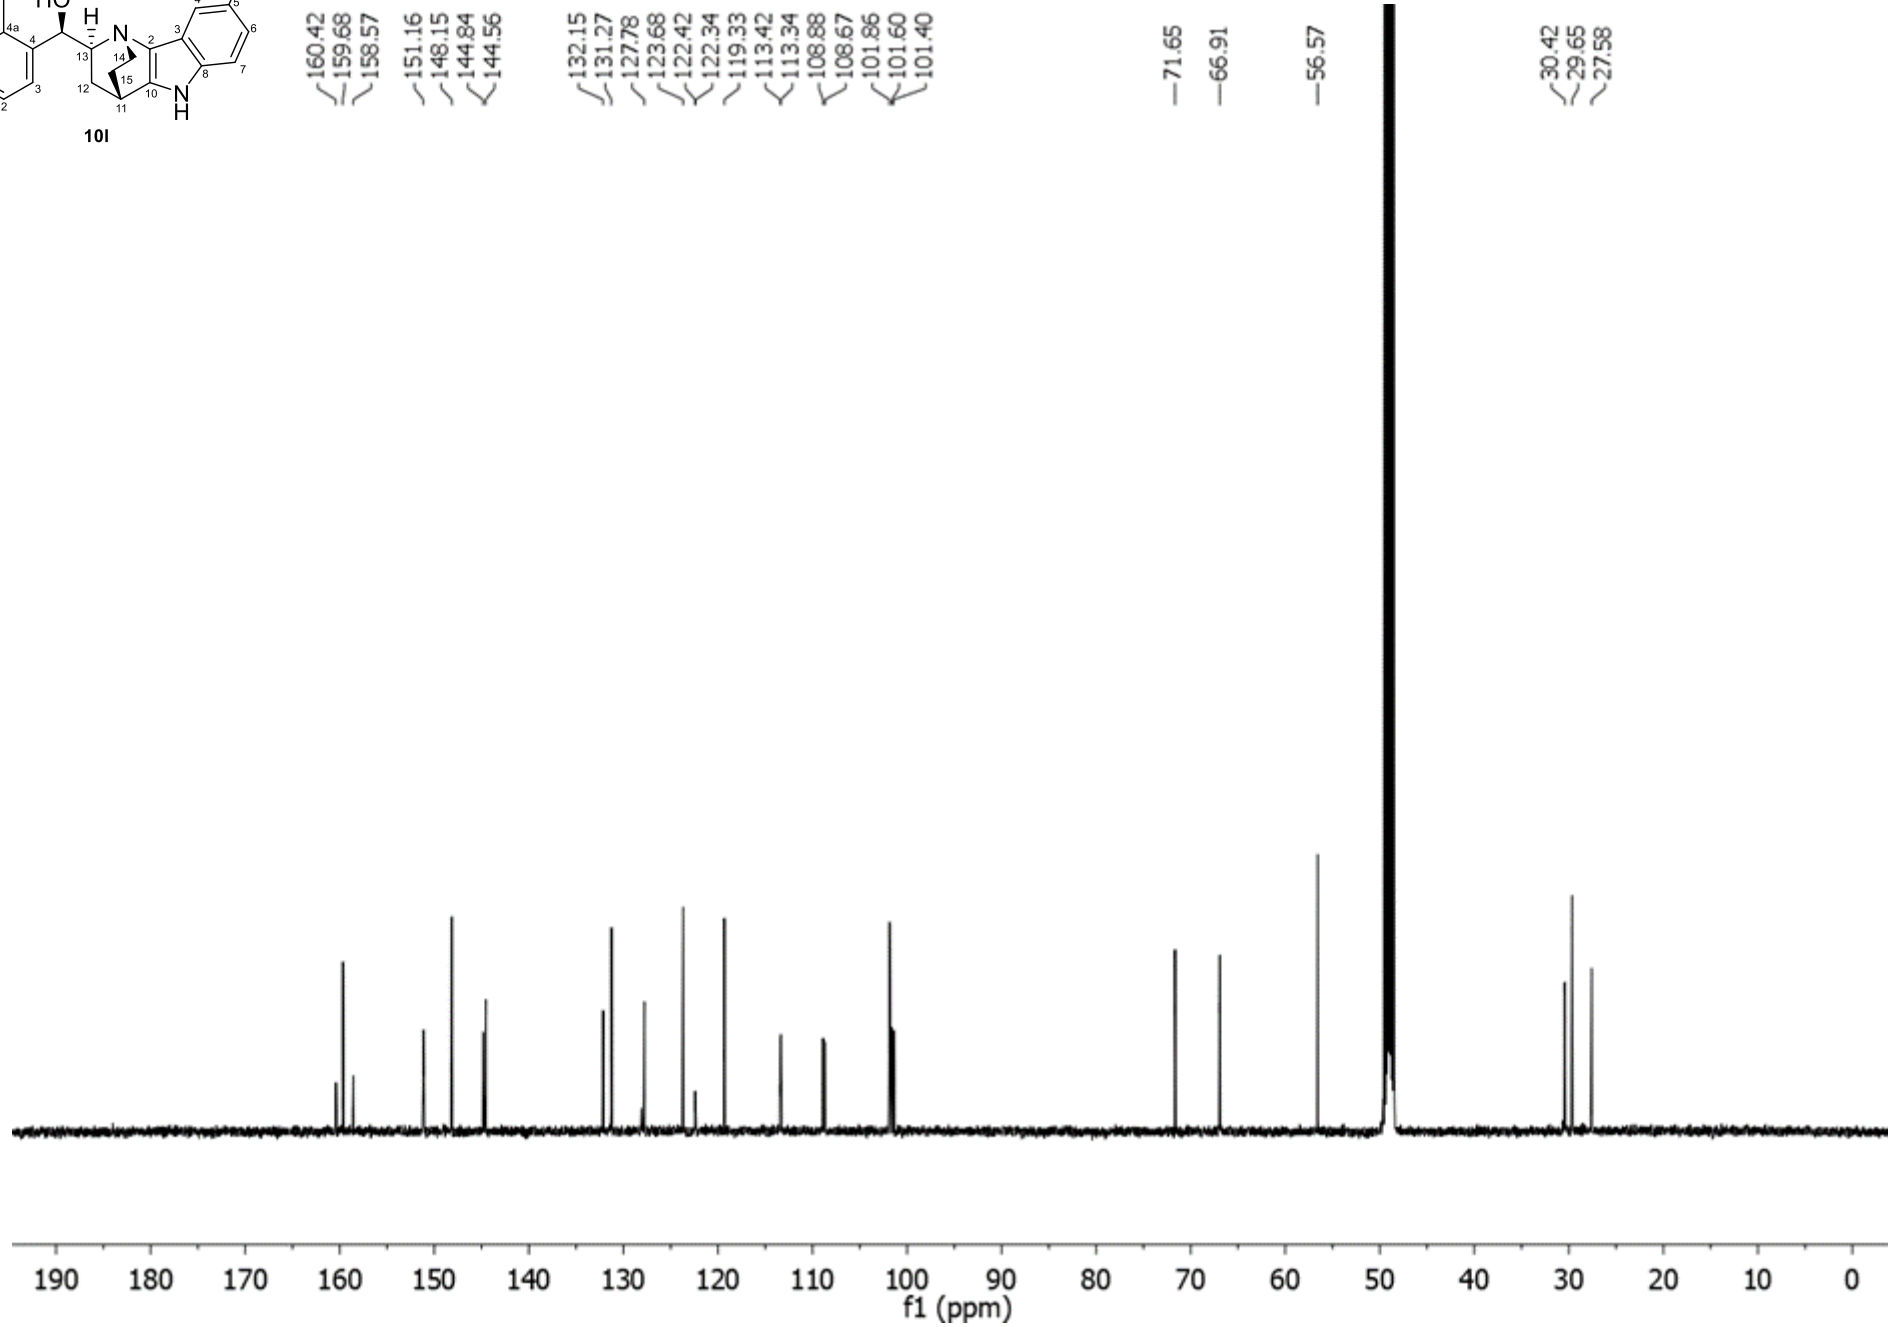

231

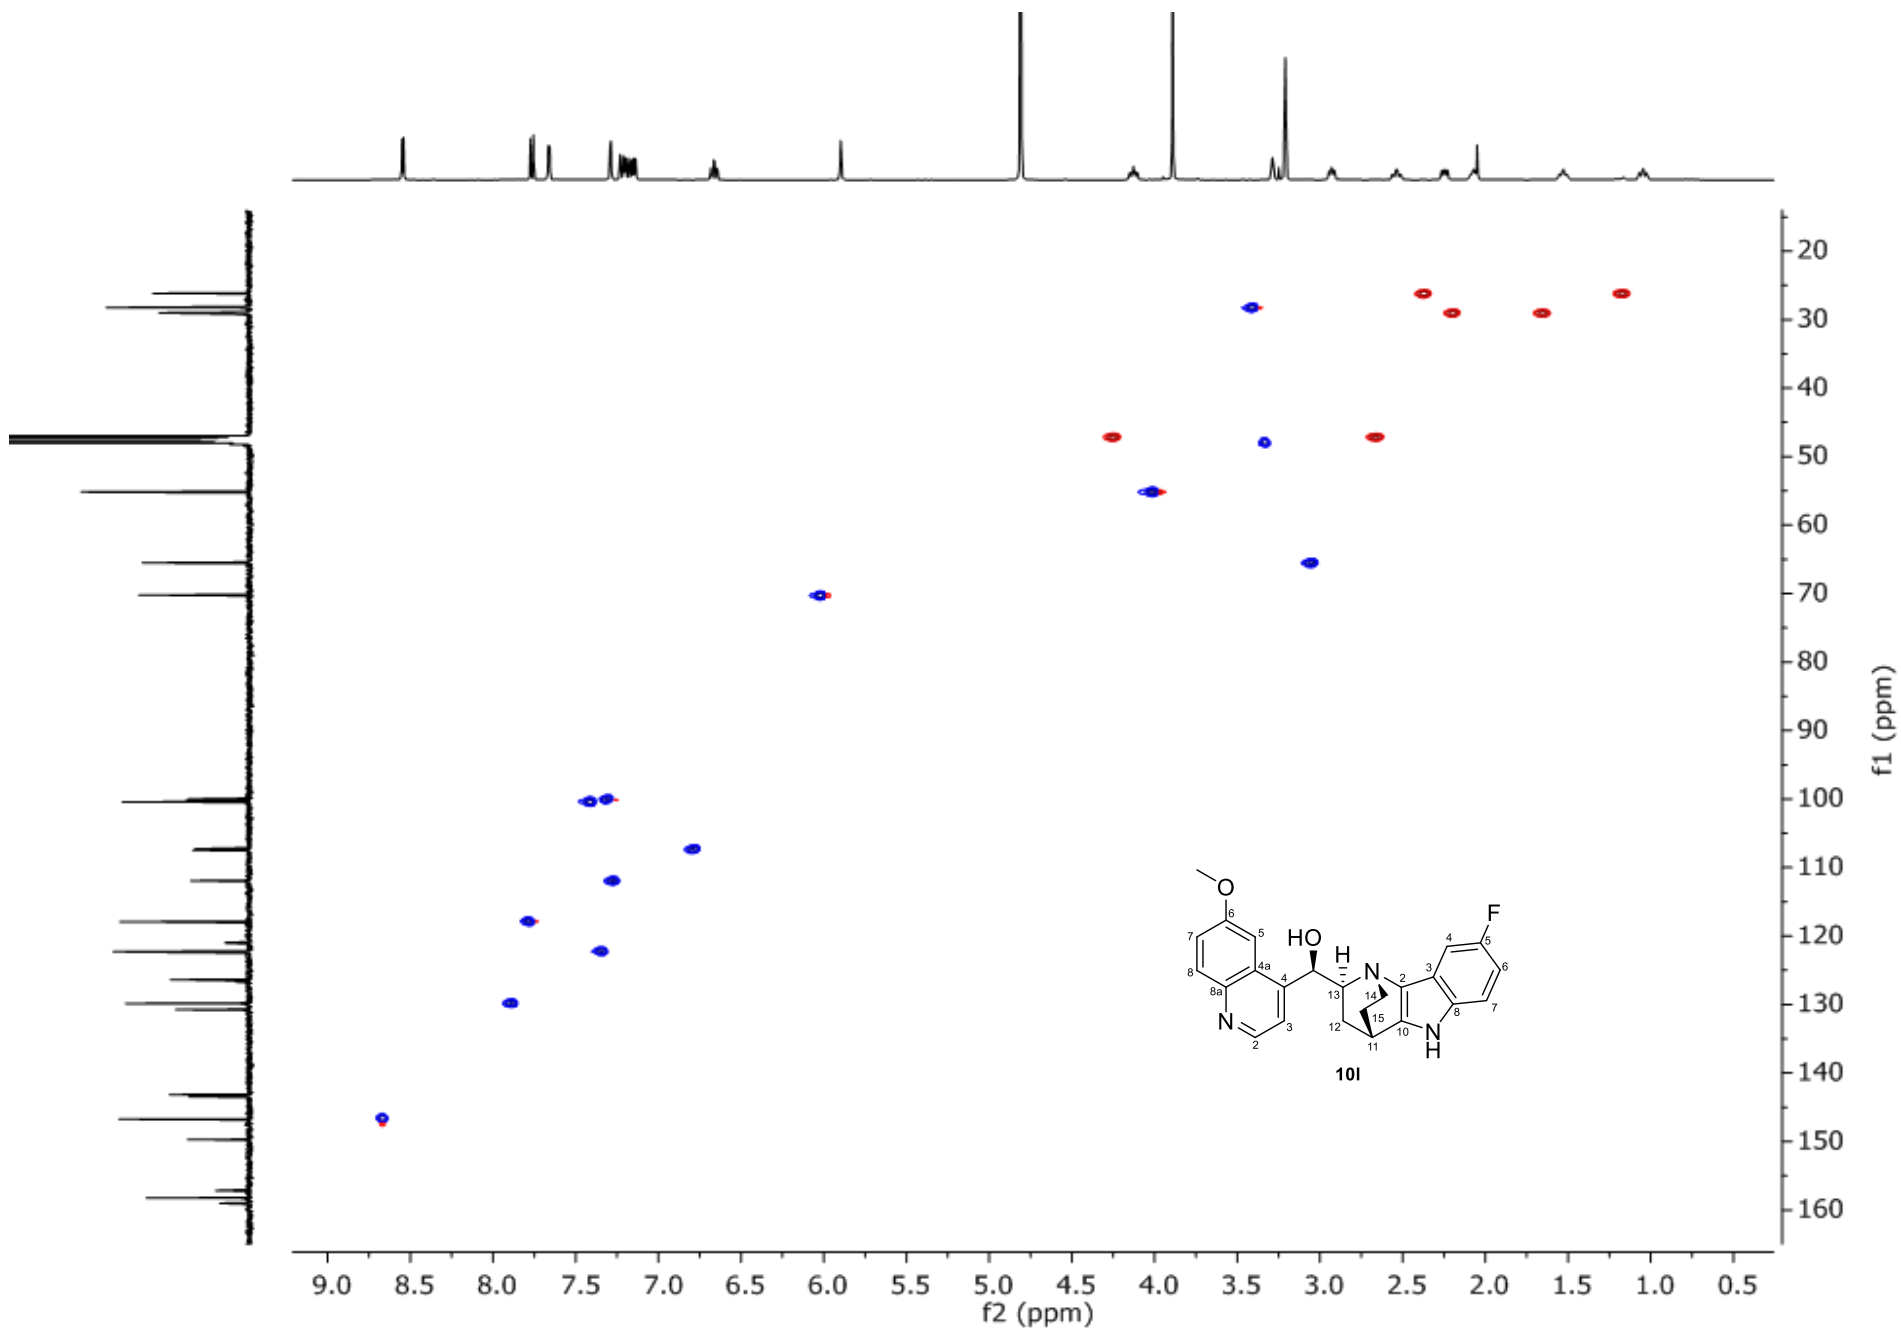



232

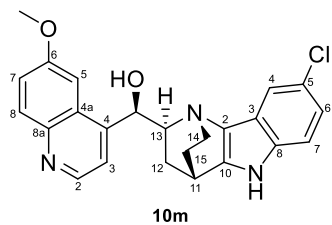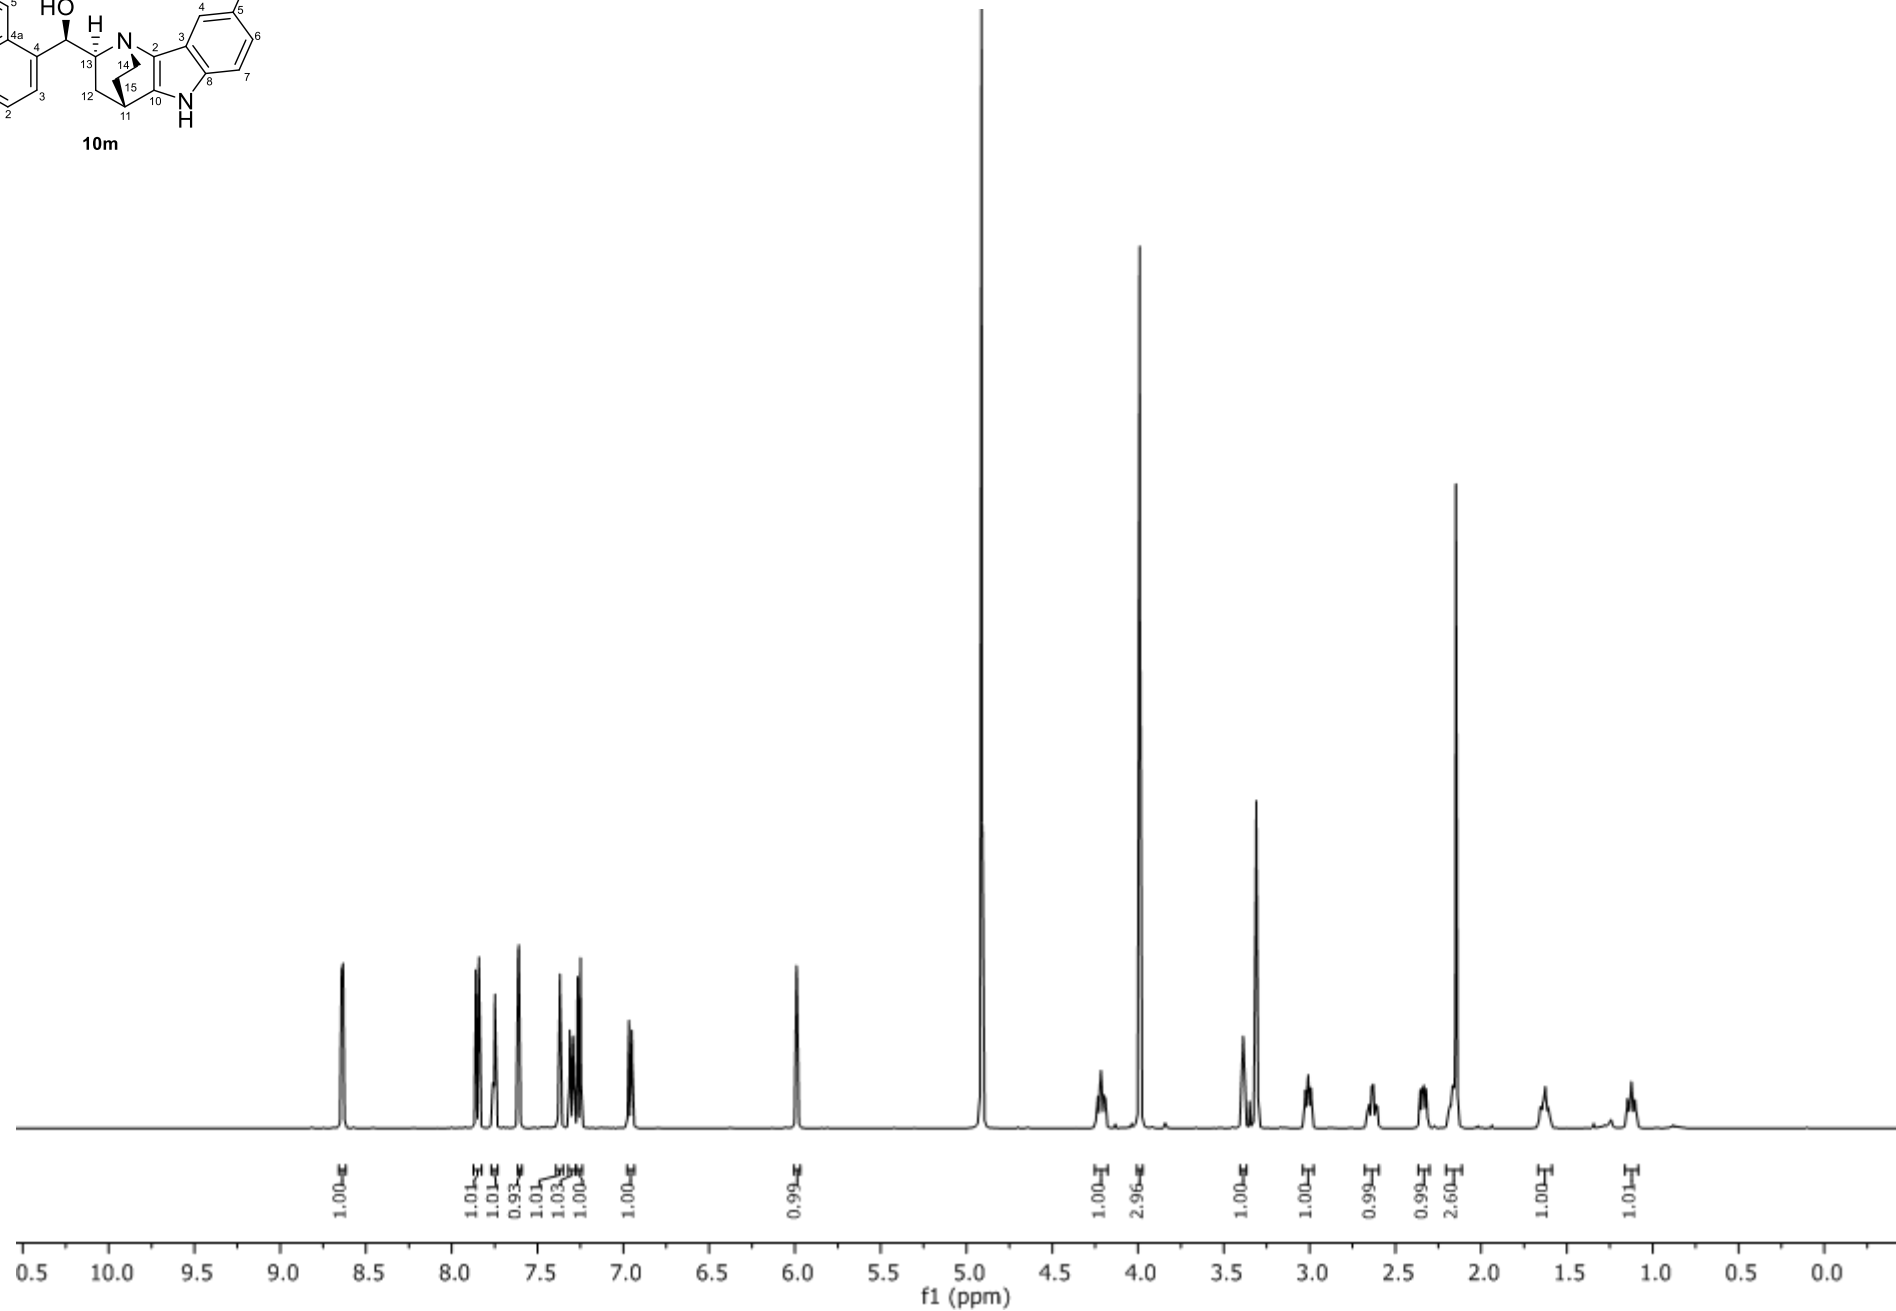

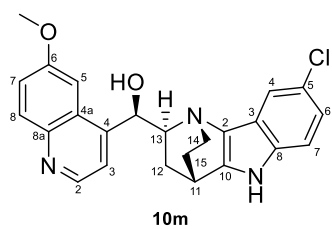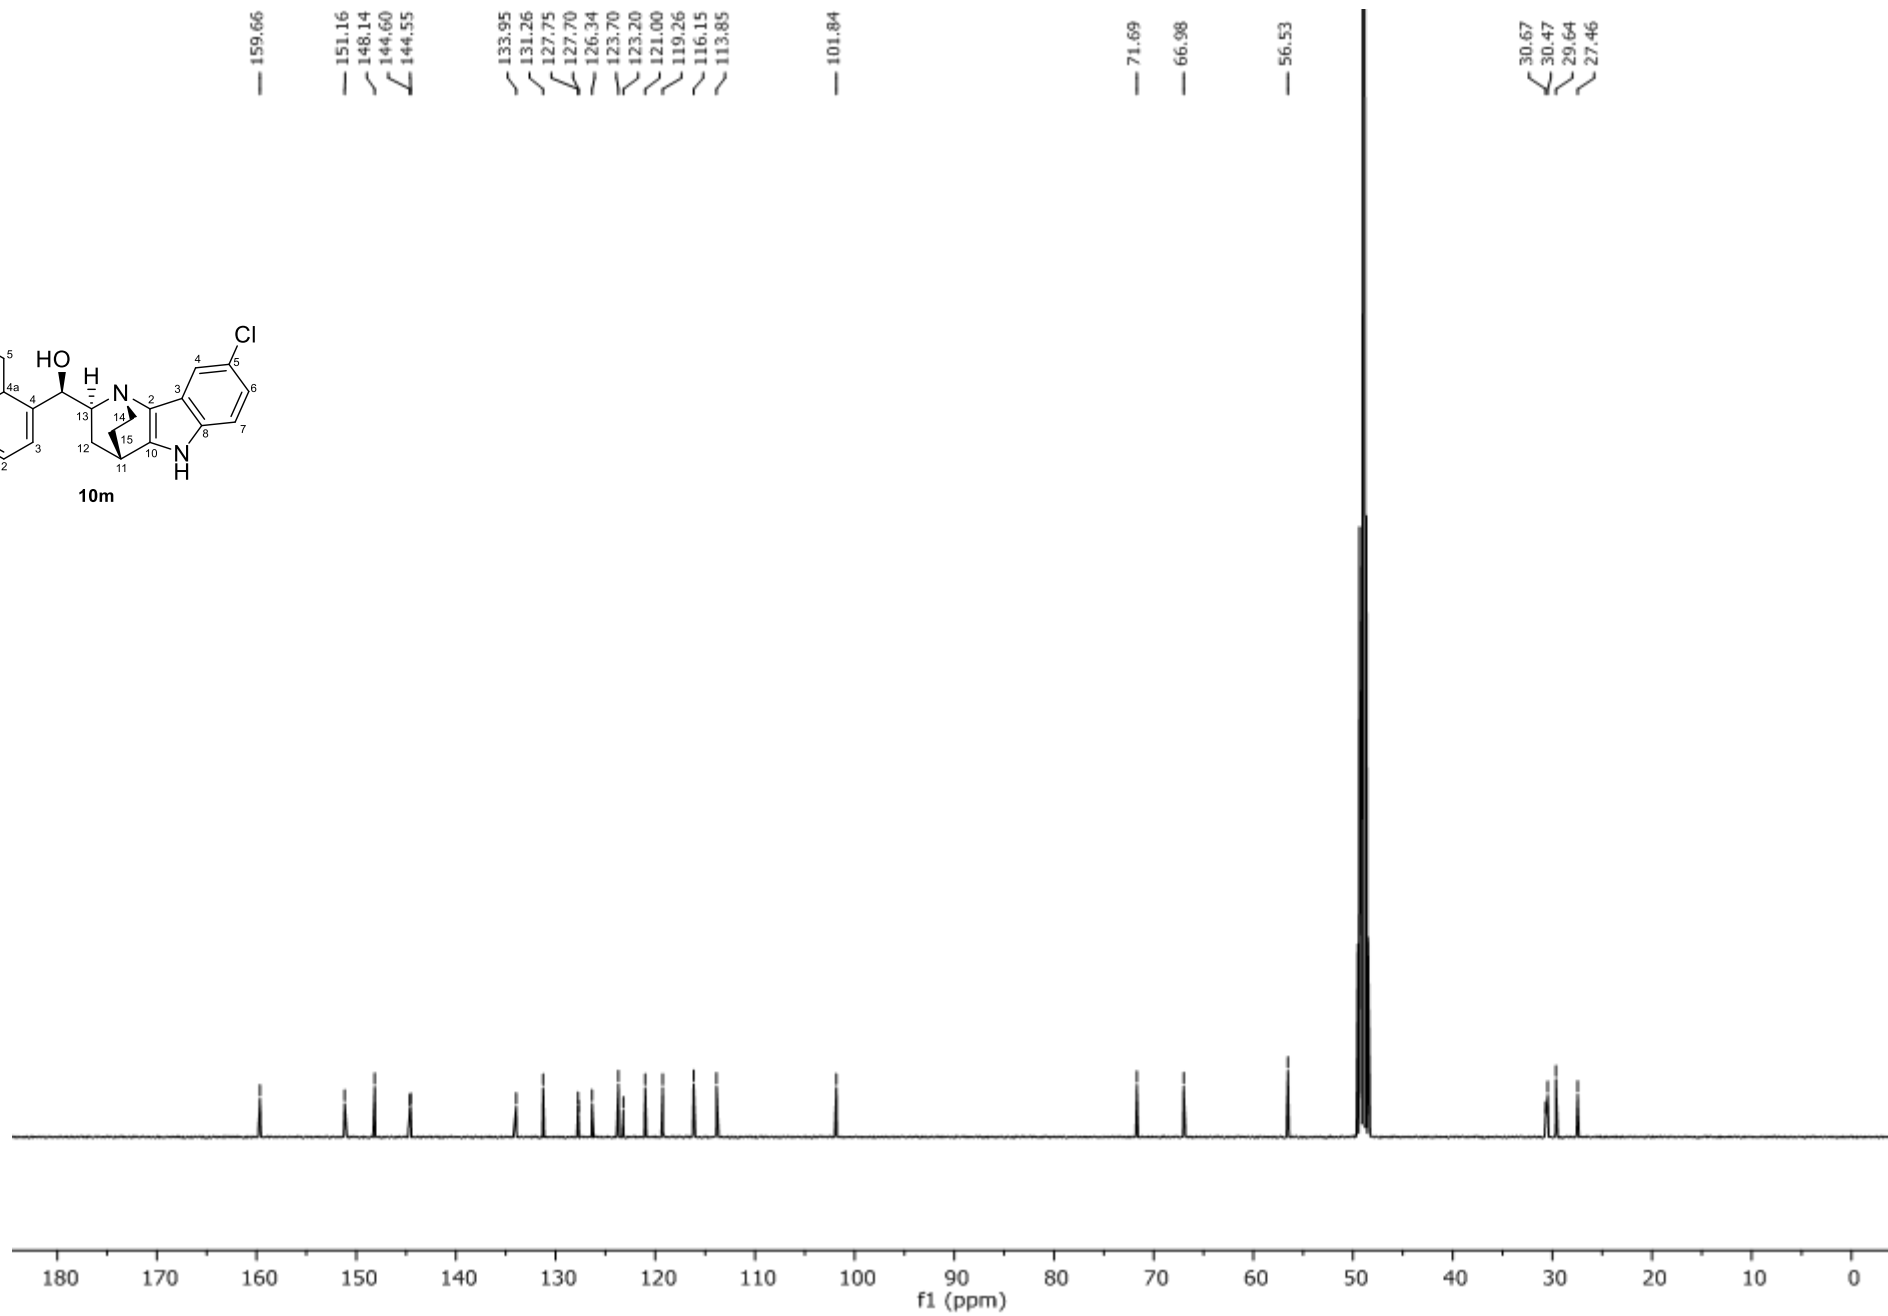

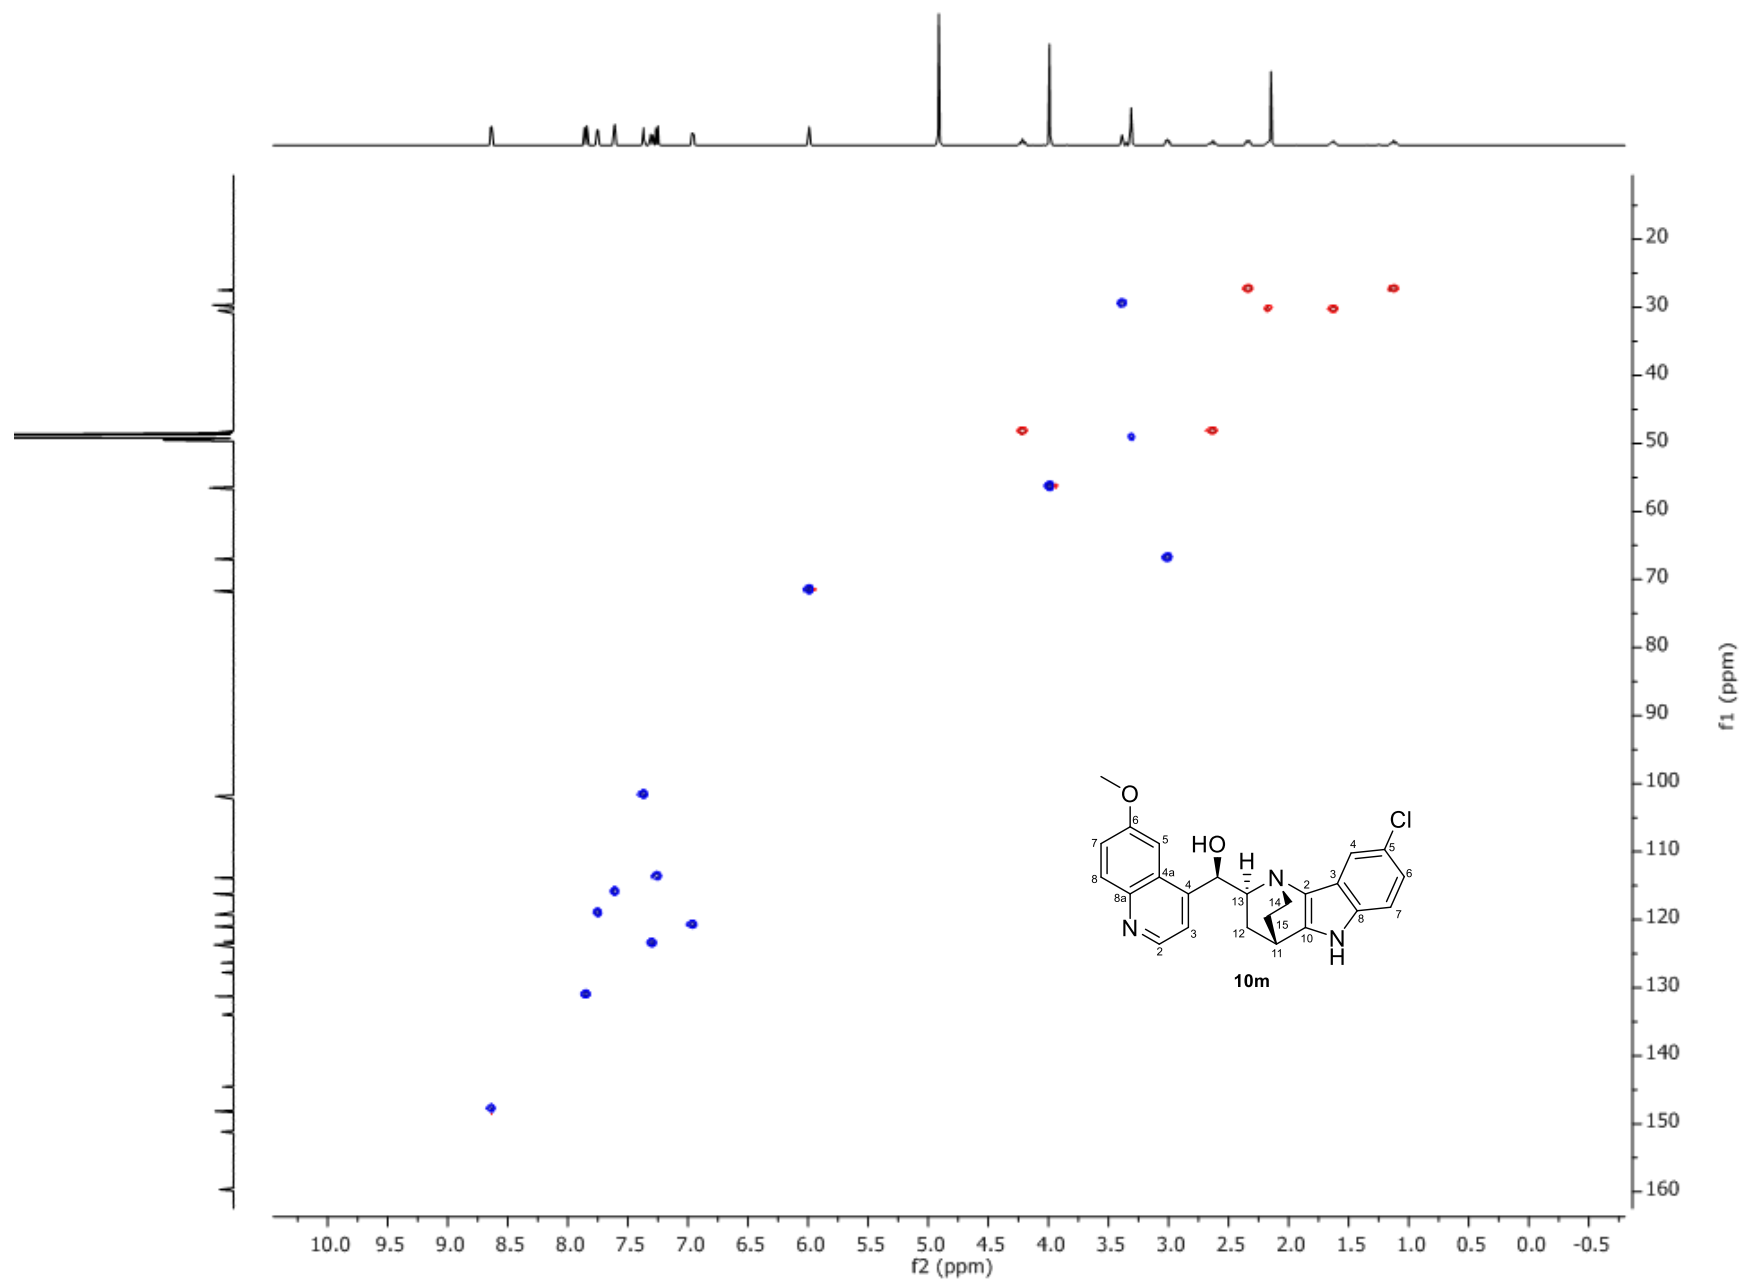



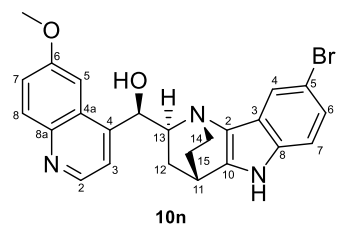

— 159.69  
/ 151.13  
/ 148.16  
/ 144.60  
/ 144.45  
/ 134.25  
/ 131.30  
/ 127.77  
/ 127.52  
/ 123.85  
/ 123.70  
/ 123.66  
/ 119.34  
/ 119.25  
/ 114.32  
/ 113.84  
— 101.91

— 71.72  
— 67.09  
— 56.56

30.47  
29.65  
27.45

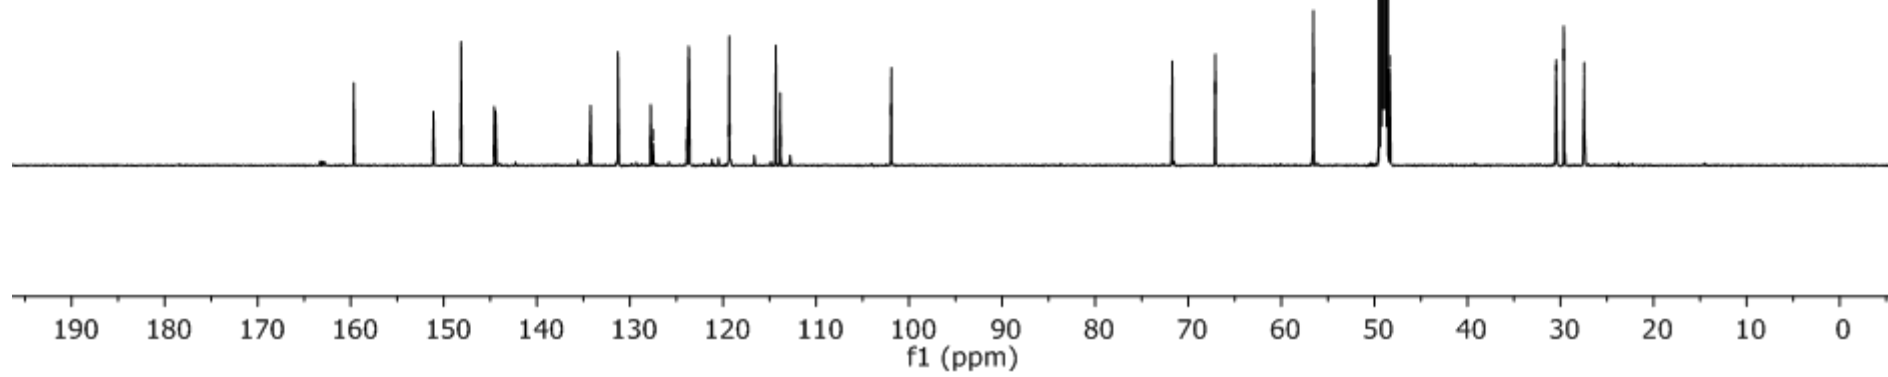

237

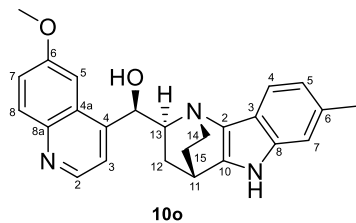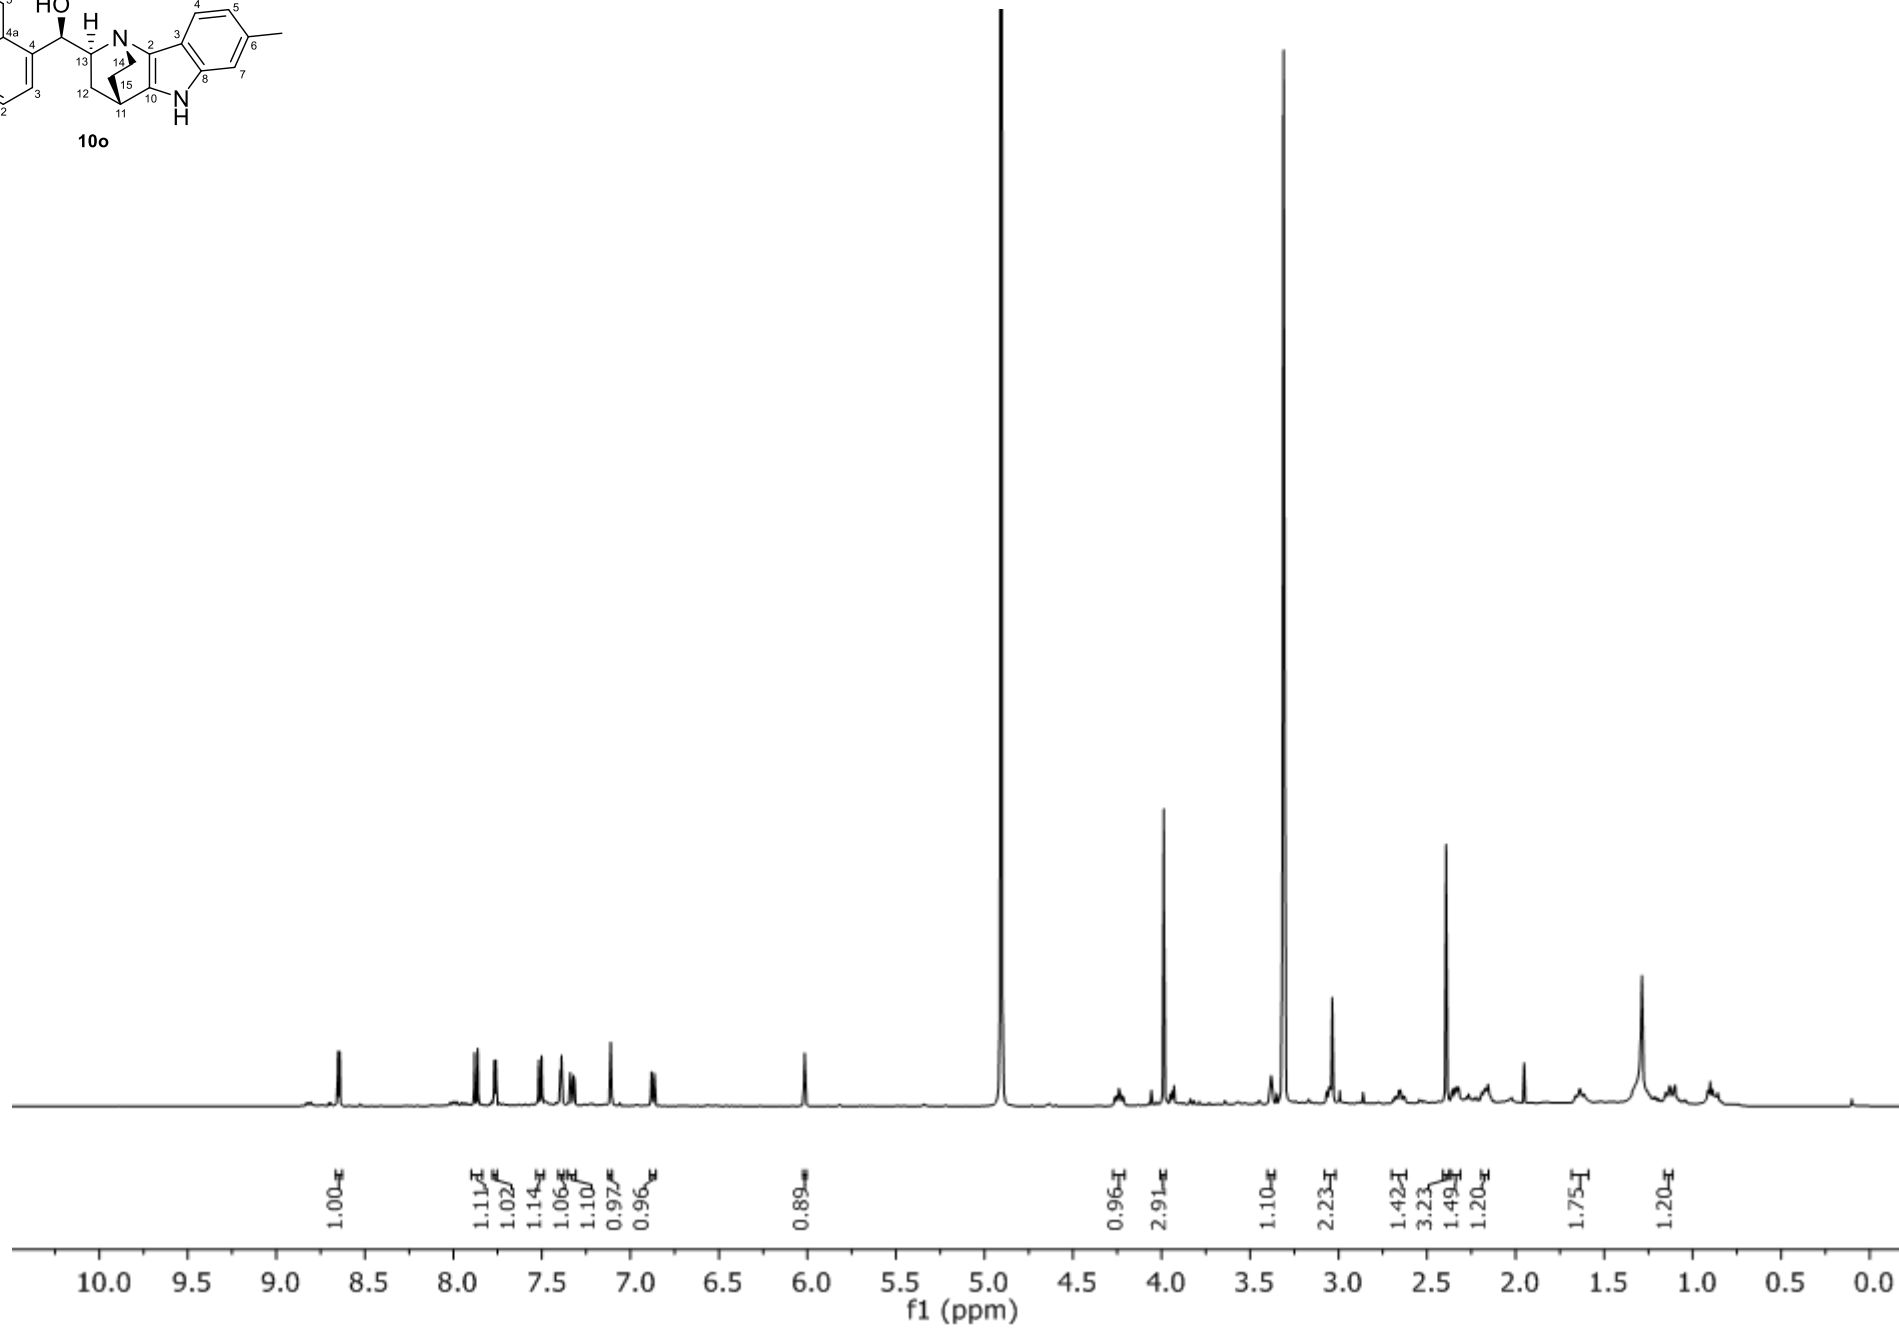

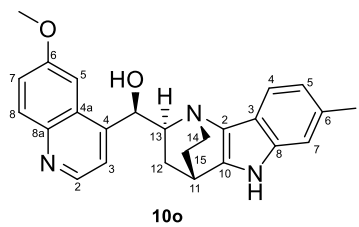

— 159.66  
/ 151.17  
/ 148.14  
/ 144.54  
/ 141.54  
/ 136.04  
/ 131.25  
/ 130.69  
/ 127.76  
/ 123.68  
/ 122.07  
/ 120.18  
/ 120.10  
/ 119.29  
/ 116.38  
/ 112.70  
— 101.87  
— 71.59  
— 67.01  
— 56.64  
— 46.26  
/ 30.47  
/ 29.51  
/ 27.58  
— 21.77

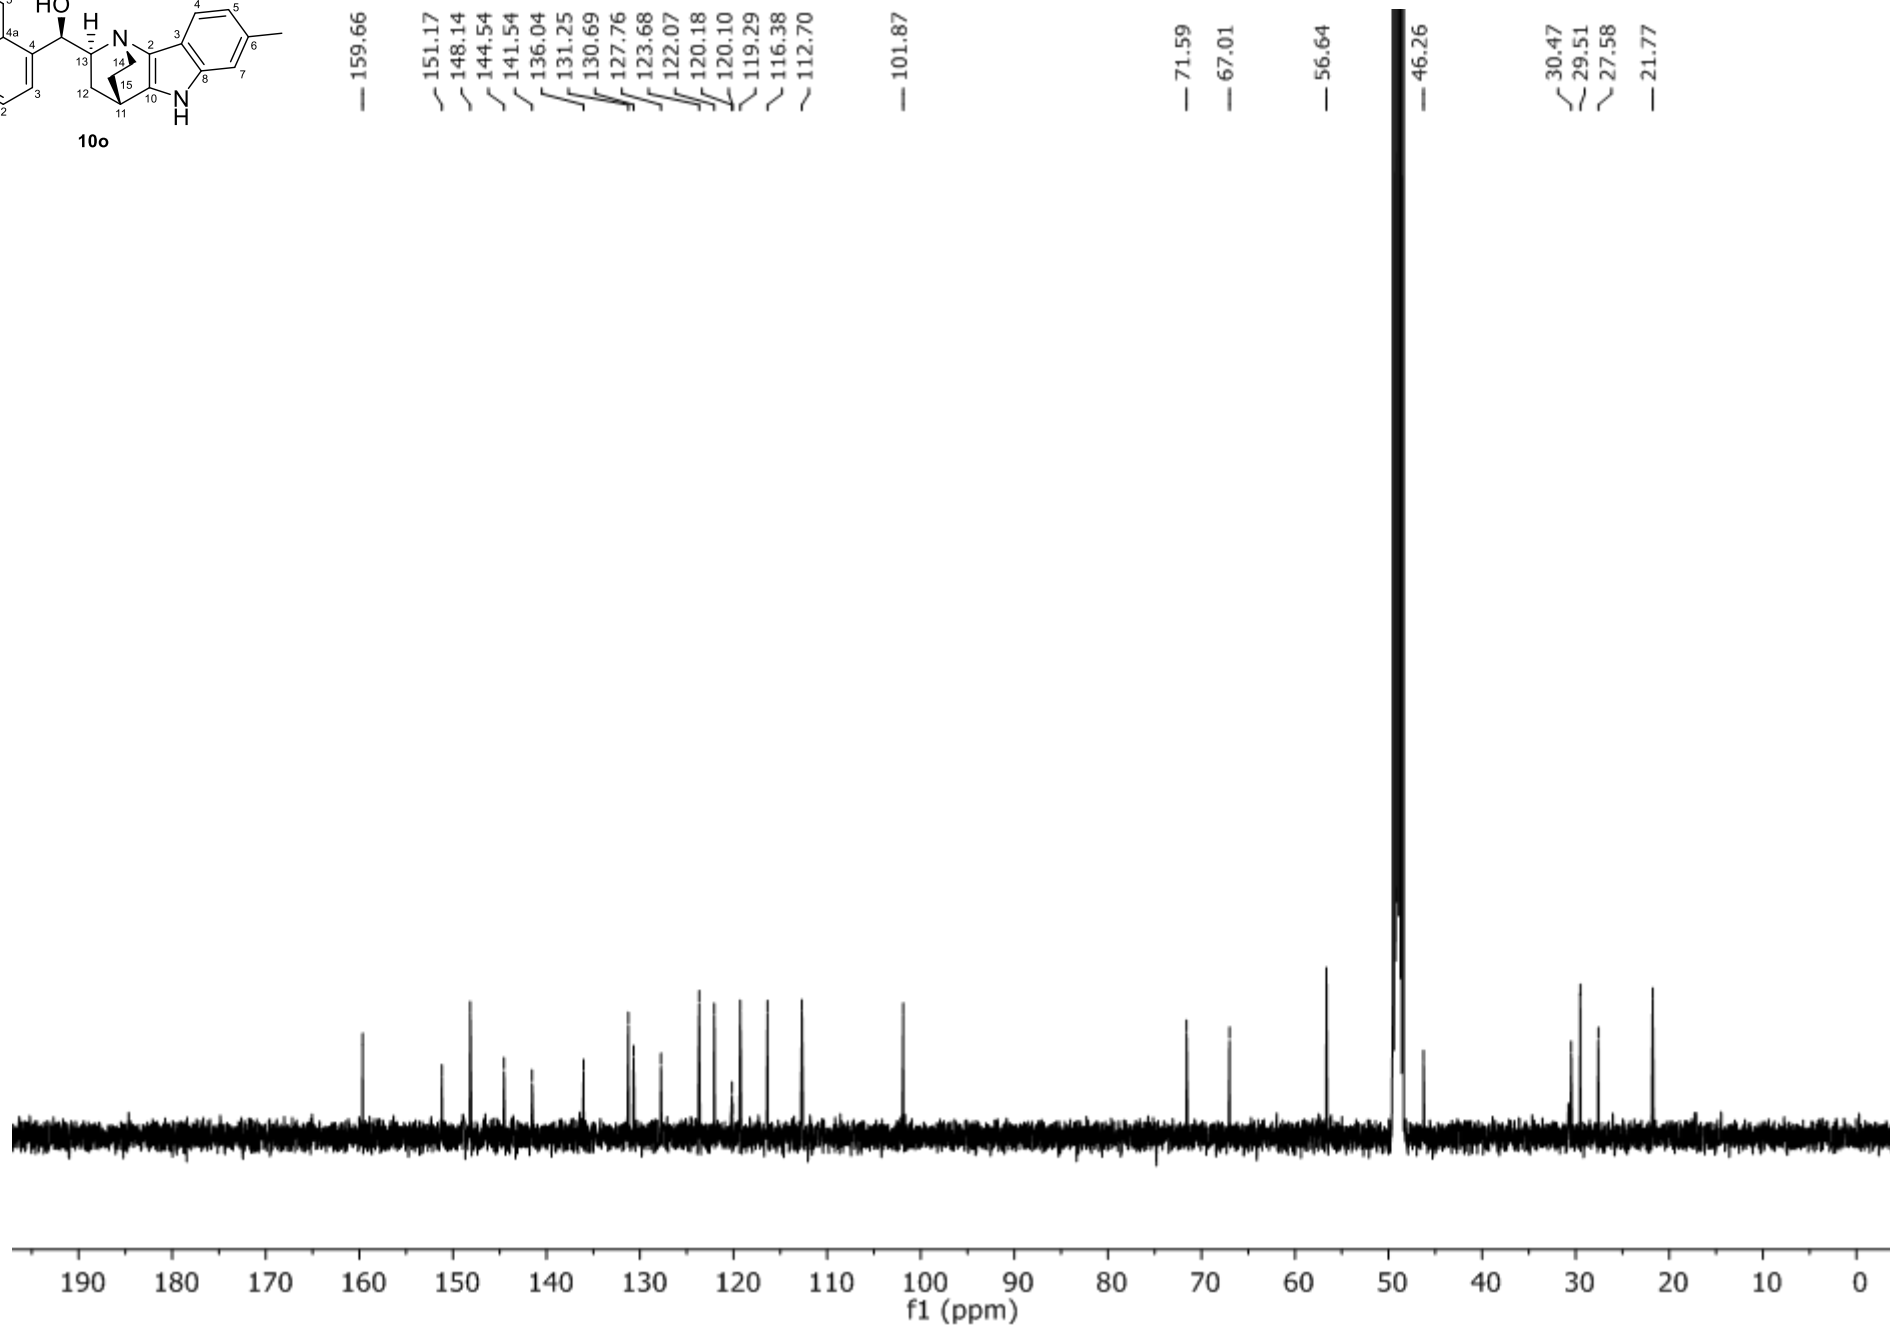

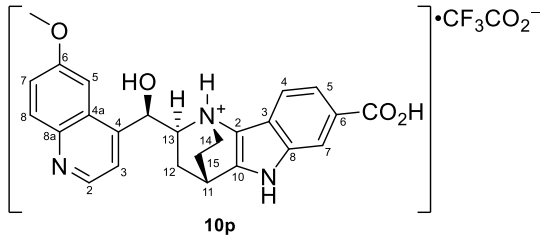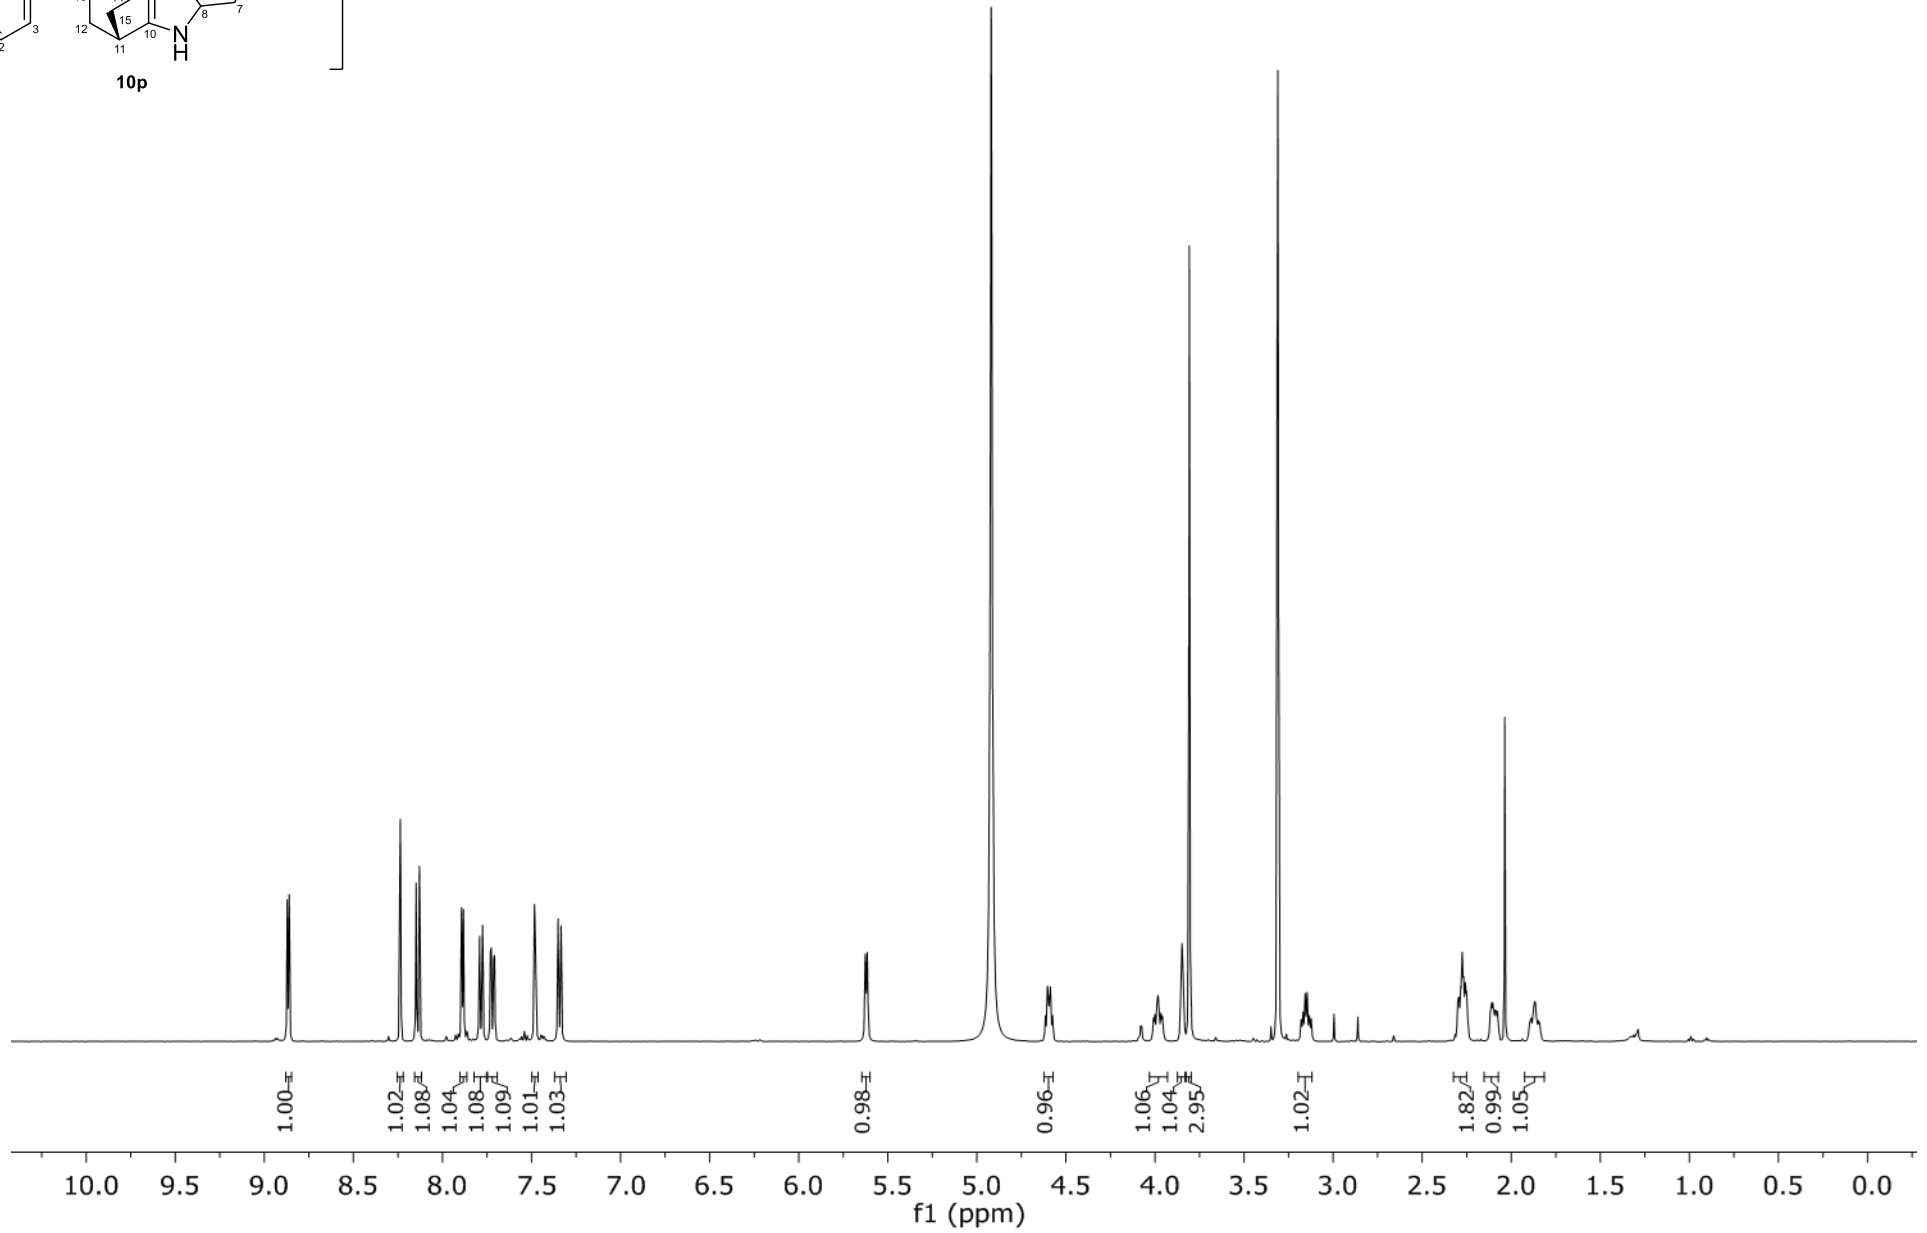



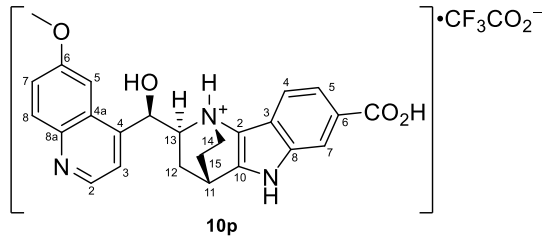

170.53  
 162.99  
 162.71  
 162.42  
 162.14  
 161.31  
 153.46

144.21  
 143.17  
 138.80  
 135.06  
 129.09  
 127.32  
 126.76  
 125.17  
 123.38  
 123.08  
 121.92  
 116.85  
 115.93  
 113.91  
 103.29

69.88  
 67.61

57.08  
 56.60

30.08  
 28.75  
 25.19

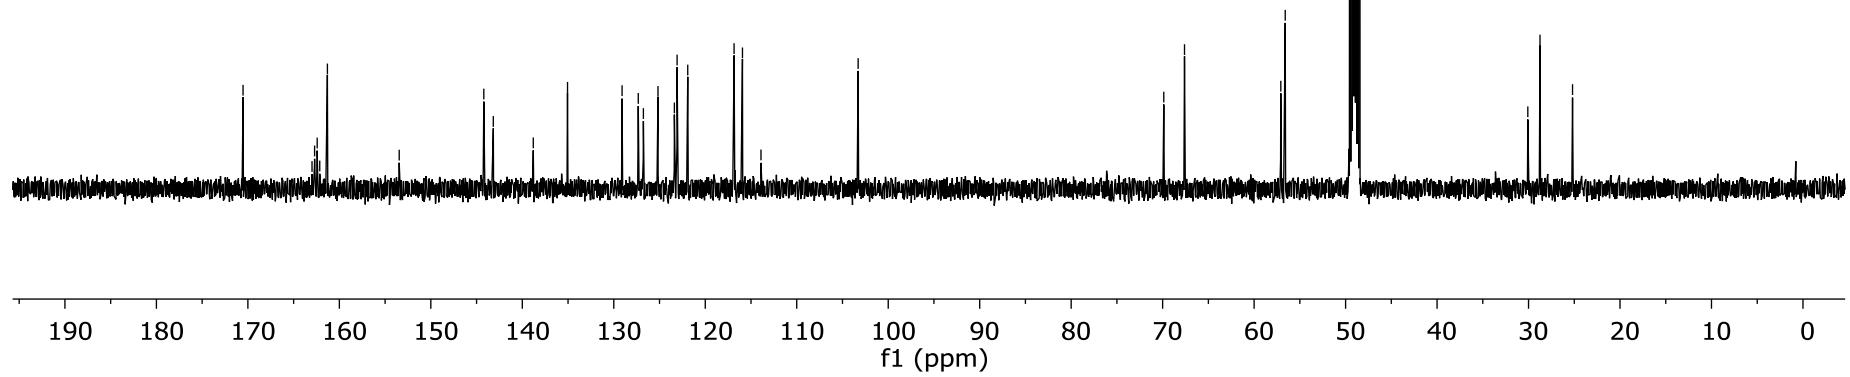

241

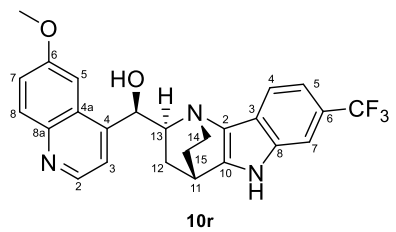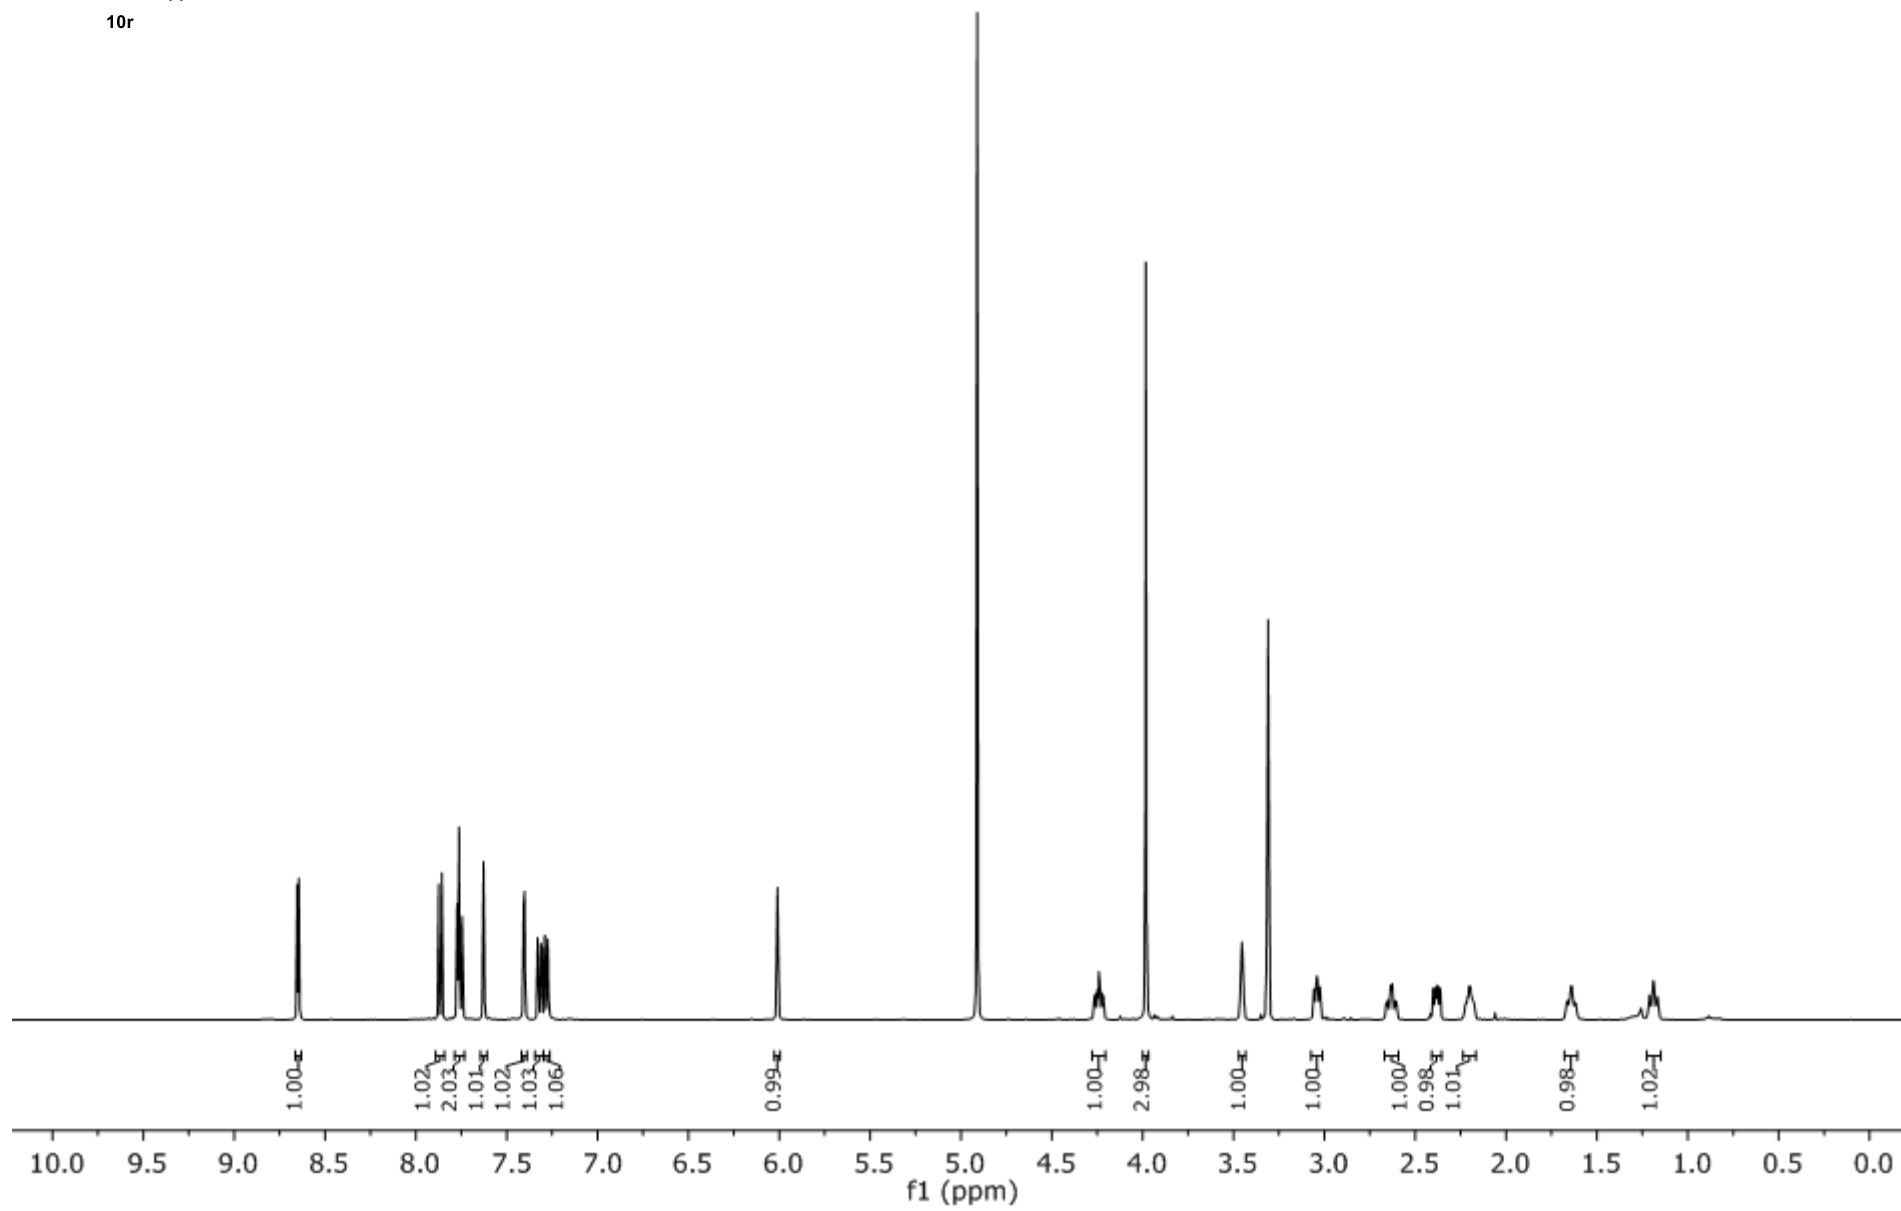

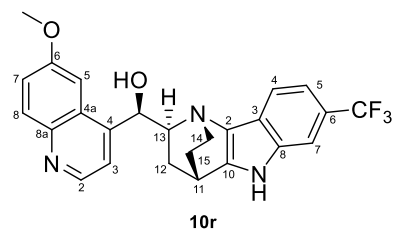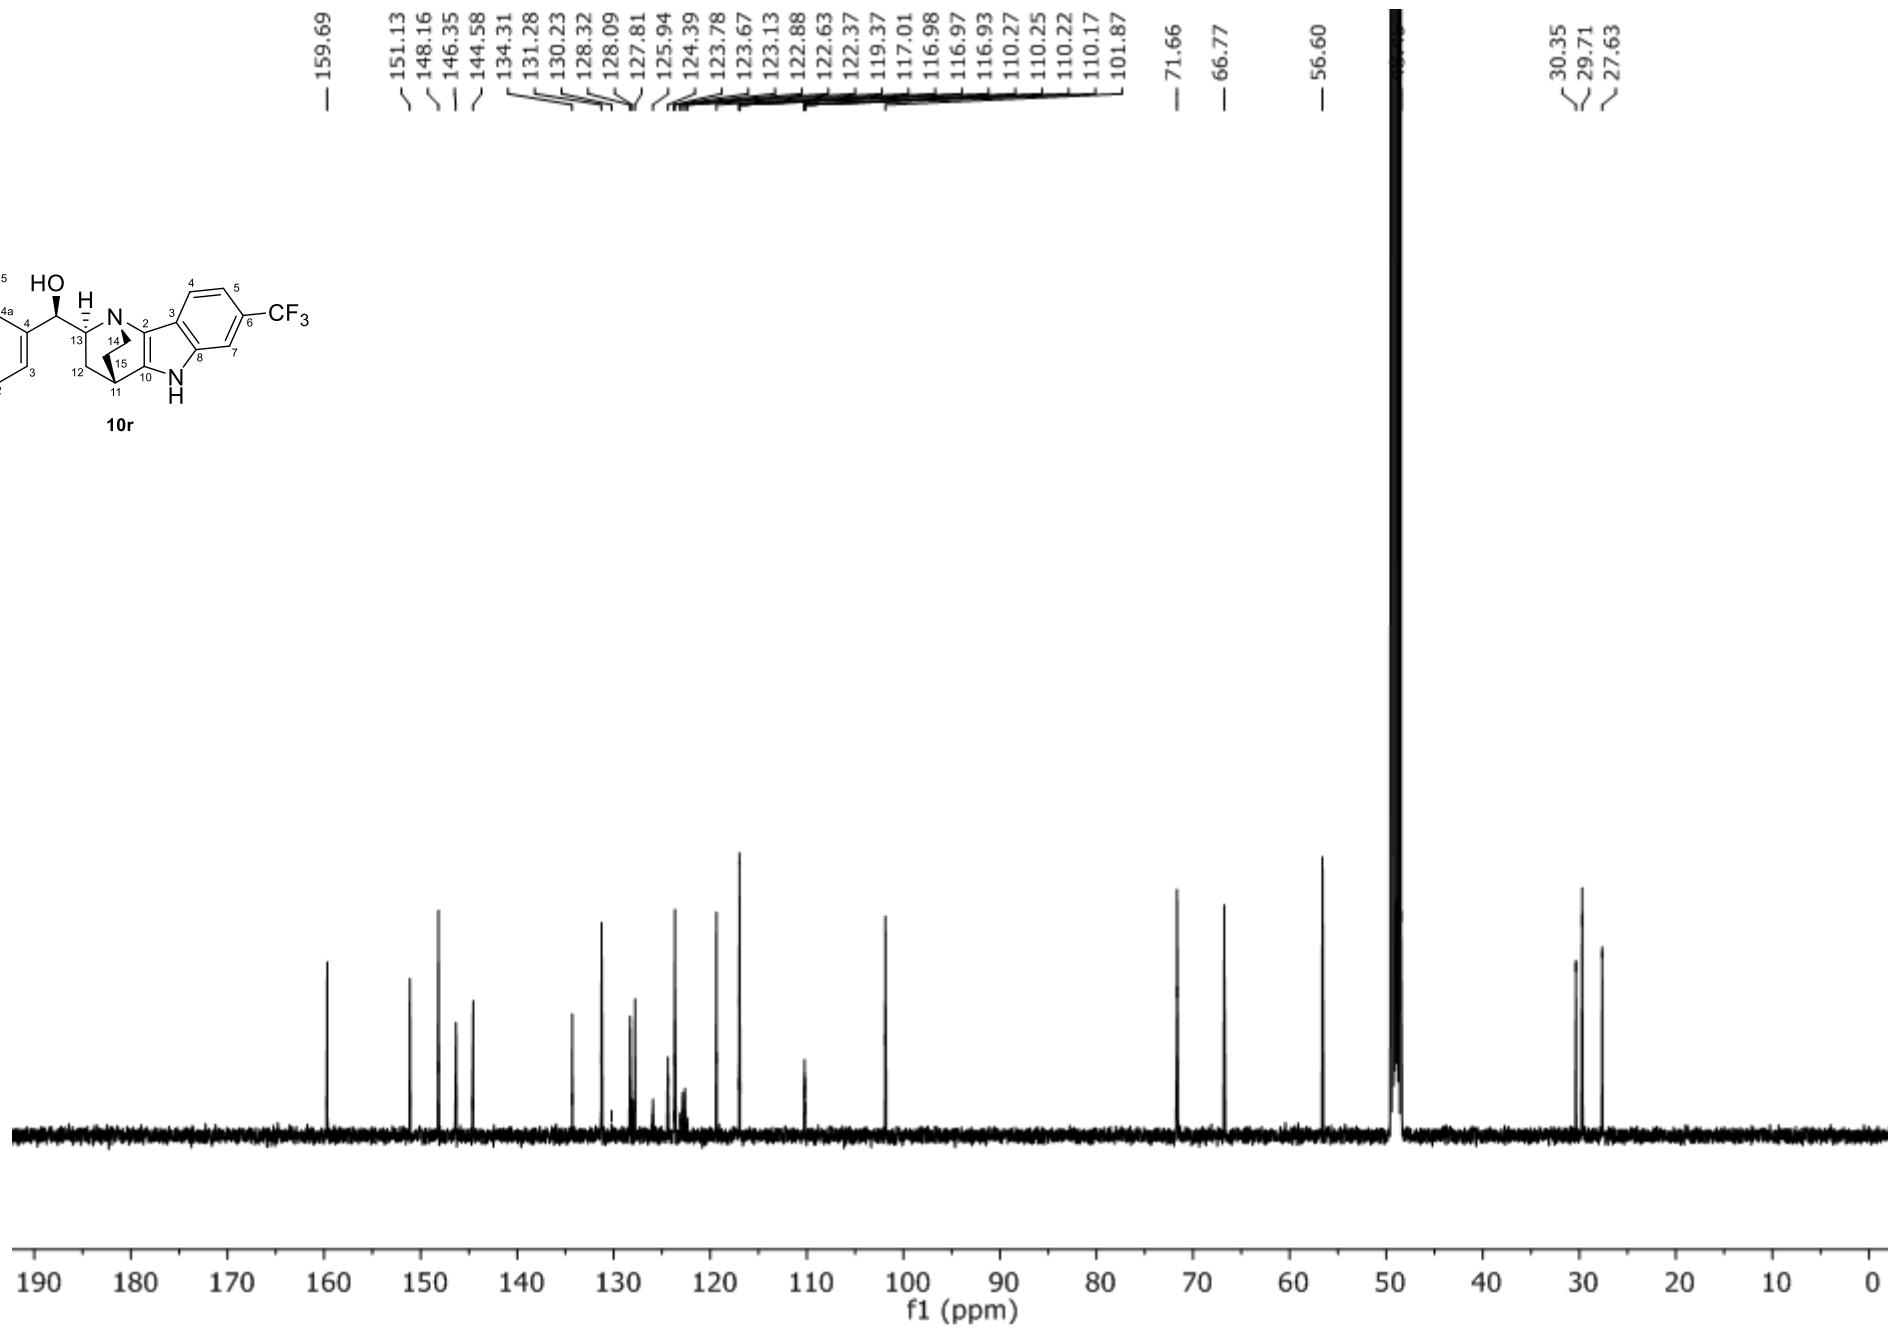

243

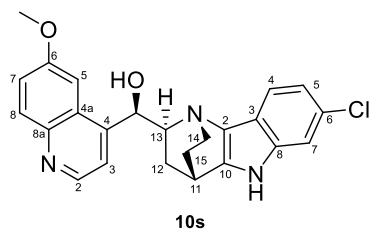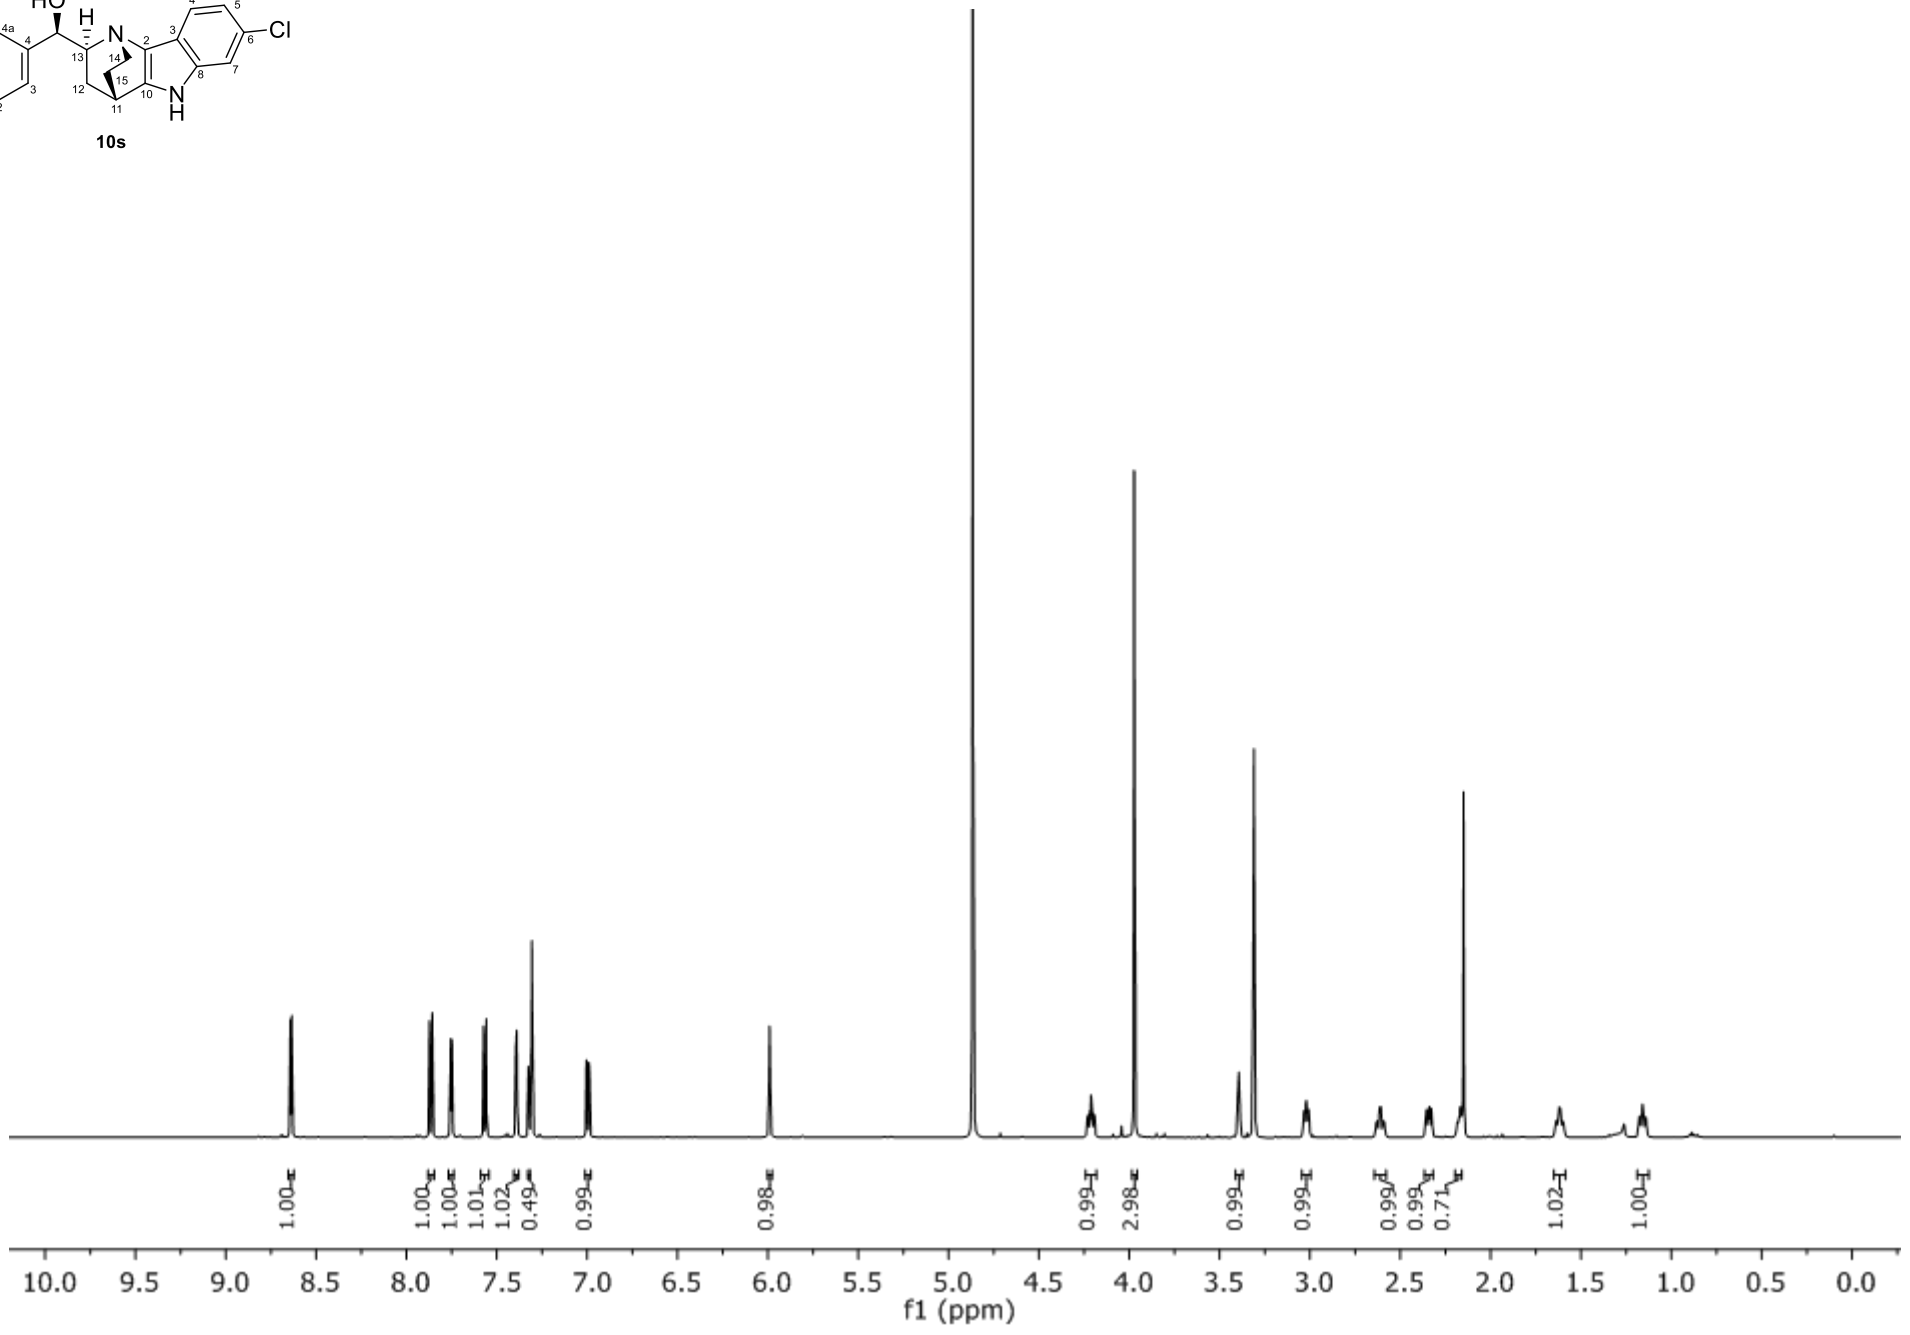

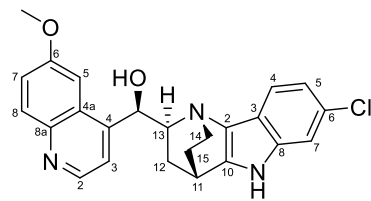

10s

— 159.67  
— 151.14  
— 148.16  
— 144.60  
— 143.68  
— 135.90  
— 131.28  
— 128.13  
— 127.81  
— 126.71  
— 123.63  
— 121.01  
— 120.86  
— 119.35  
— 117.55  
— 112.62  
— 101.95

— 71.69  
— 66.86

— 56.60

— 30.46  
— 29.60  
— 27.72

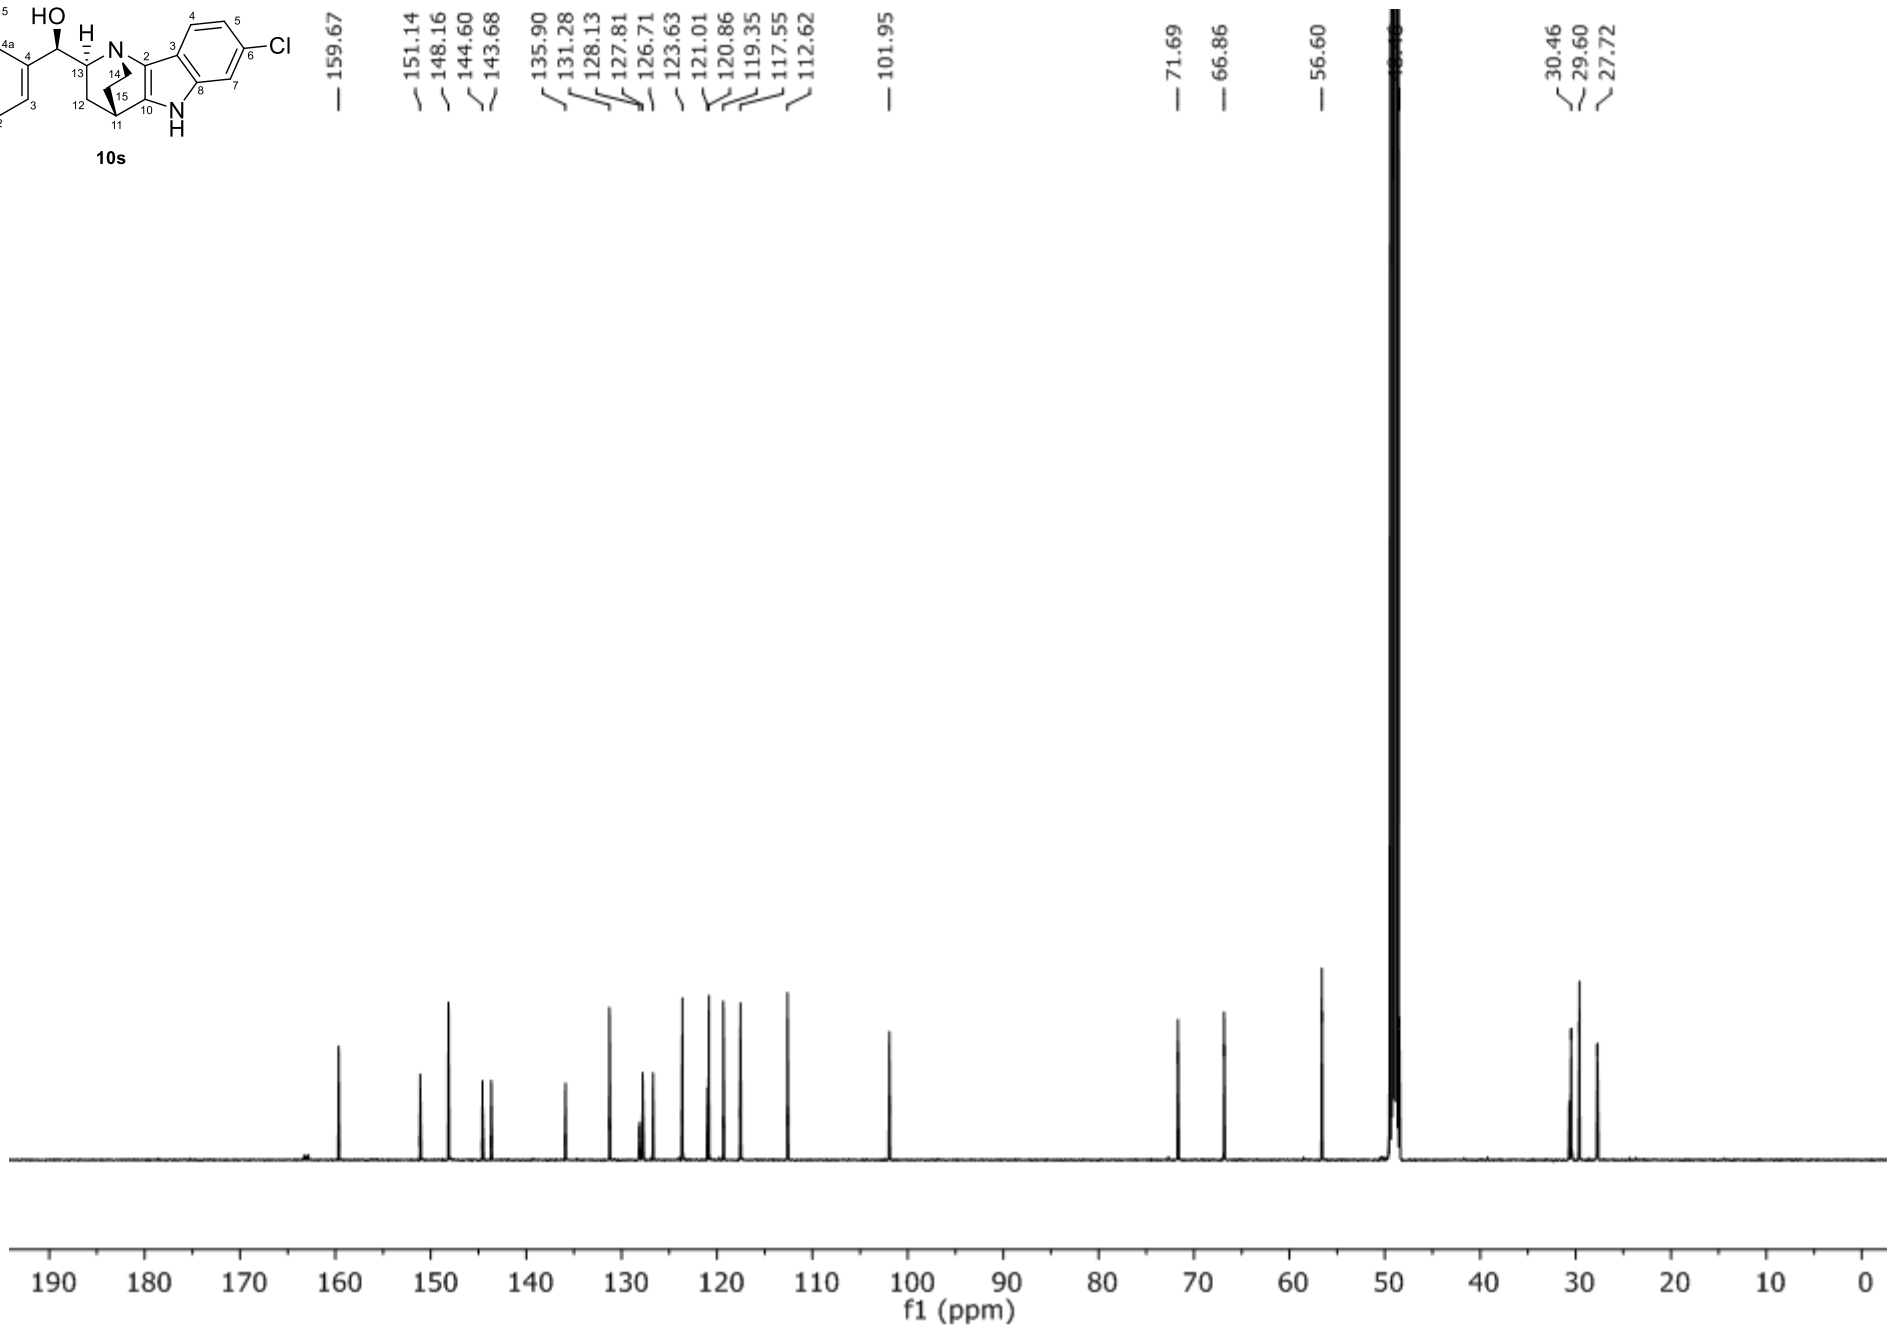

245

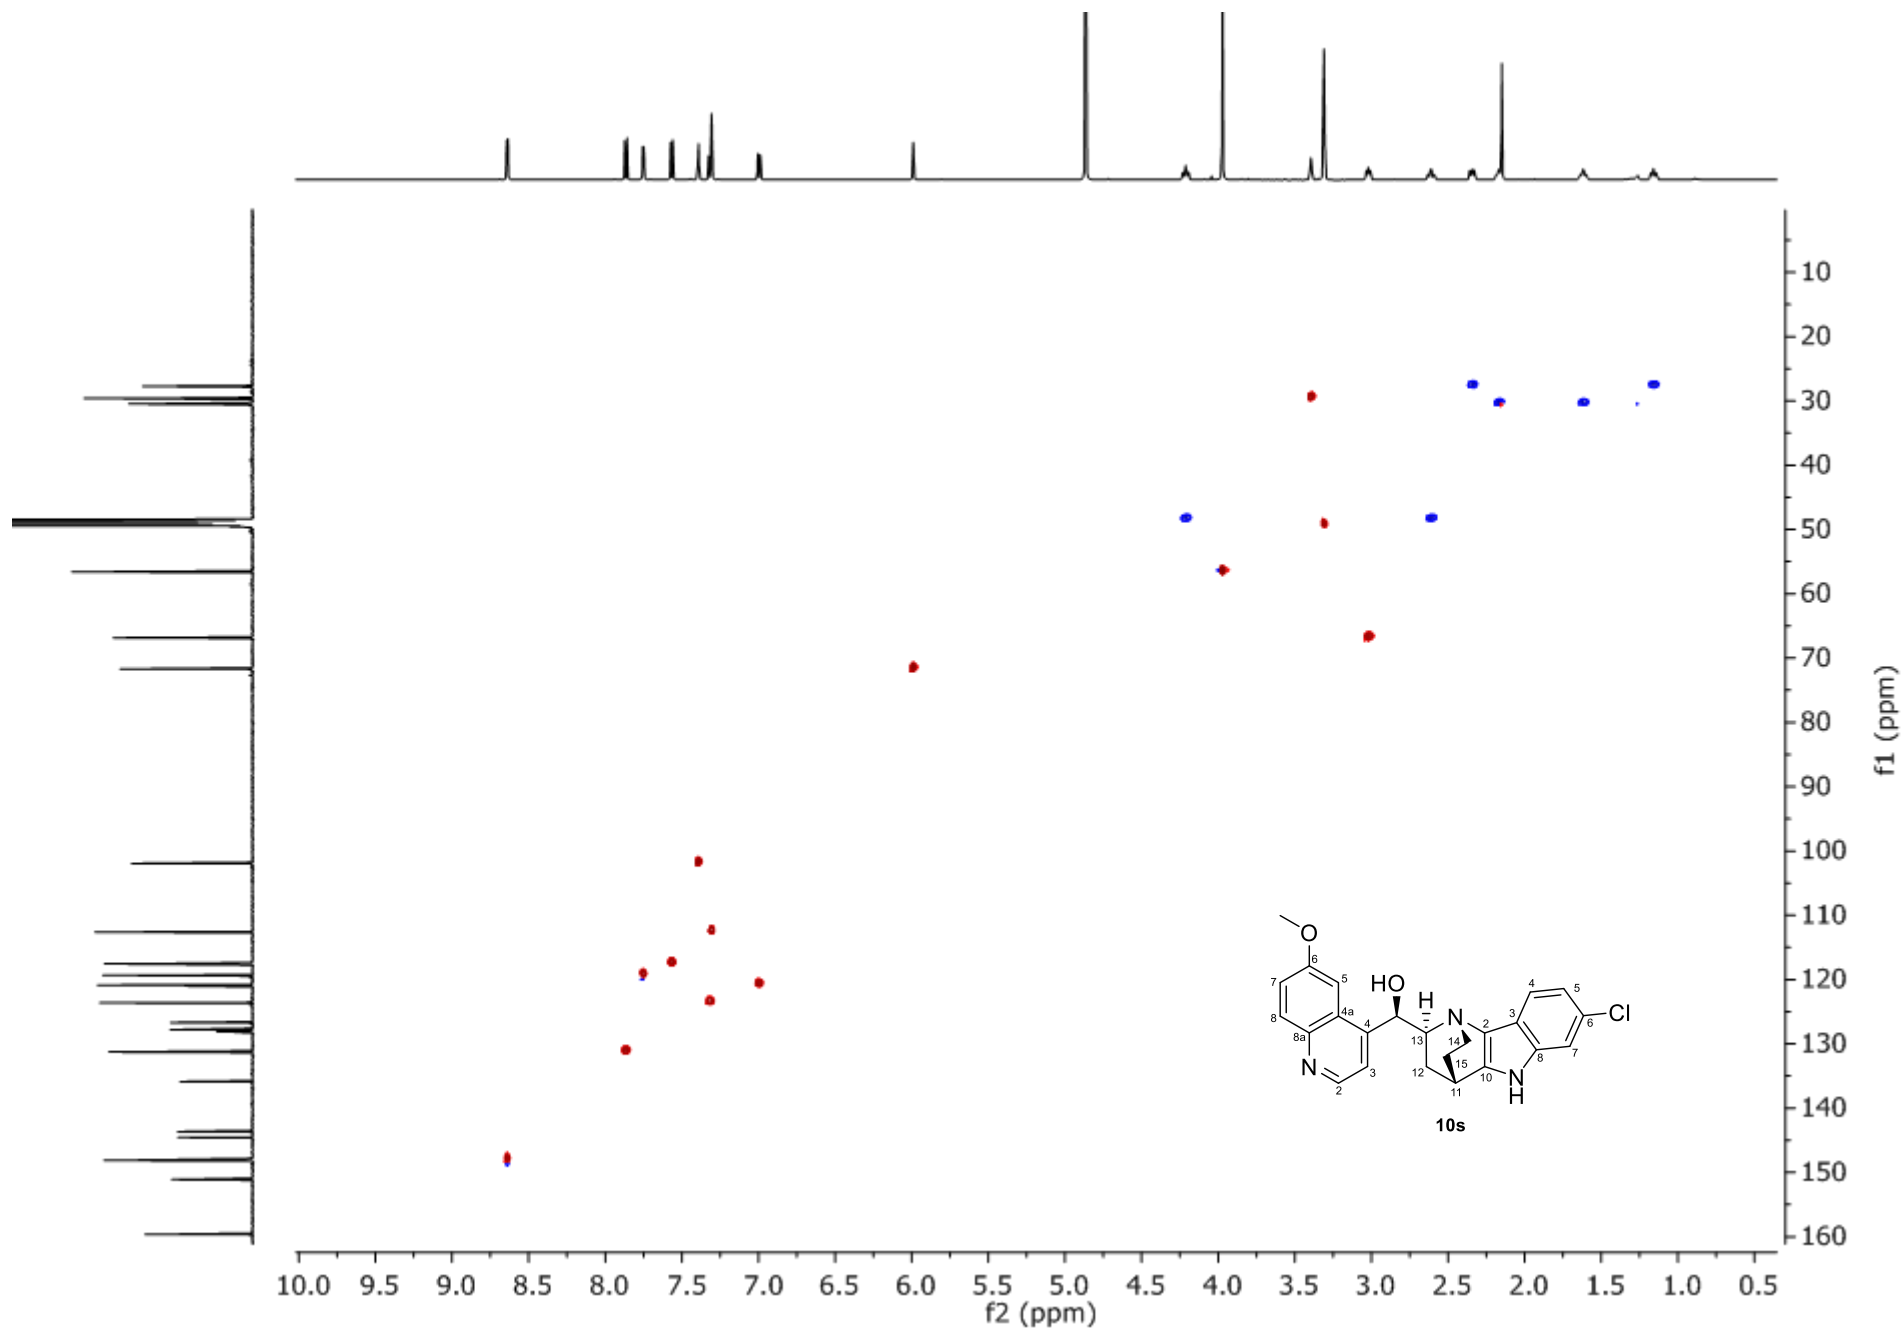



247

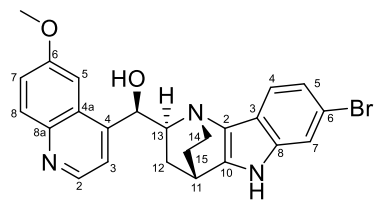

10t

- 159.69
- ✓ 151.14
- ✓ 148.17
- ✓ 144.61
- ✓ 143.68
- ✓ 136.33
- ✓ 131.29
- ✓ 127.82
- ✓ 123.64
- ✓ 121.26
- ✓ 121.11
- ✓ 120.43
- ✓ 119.36
- ✓ 117.95
- ✓ 115.63
- ✓ 114.05

- 101.95

- 71.69
- 66.85

- 56.61

- ✓ 30.42
- ✓ 29.57
- ✓ 27.70

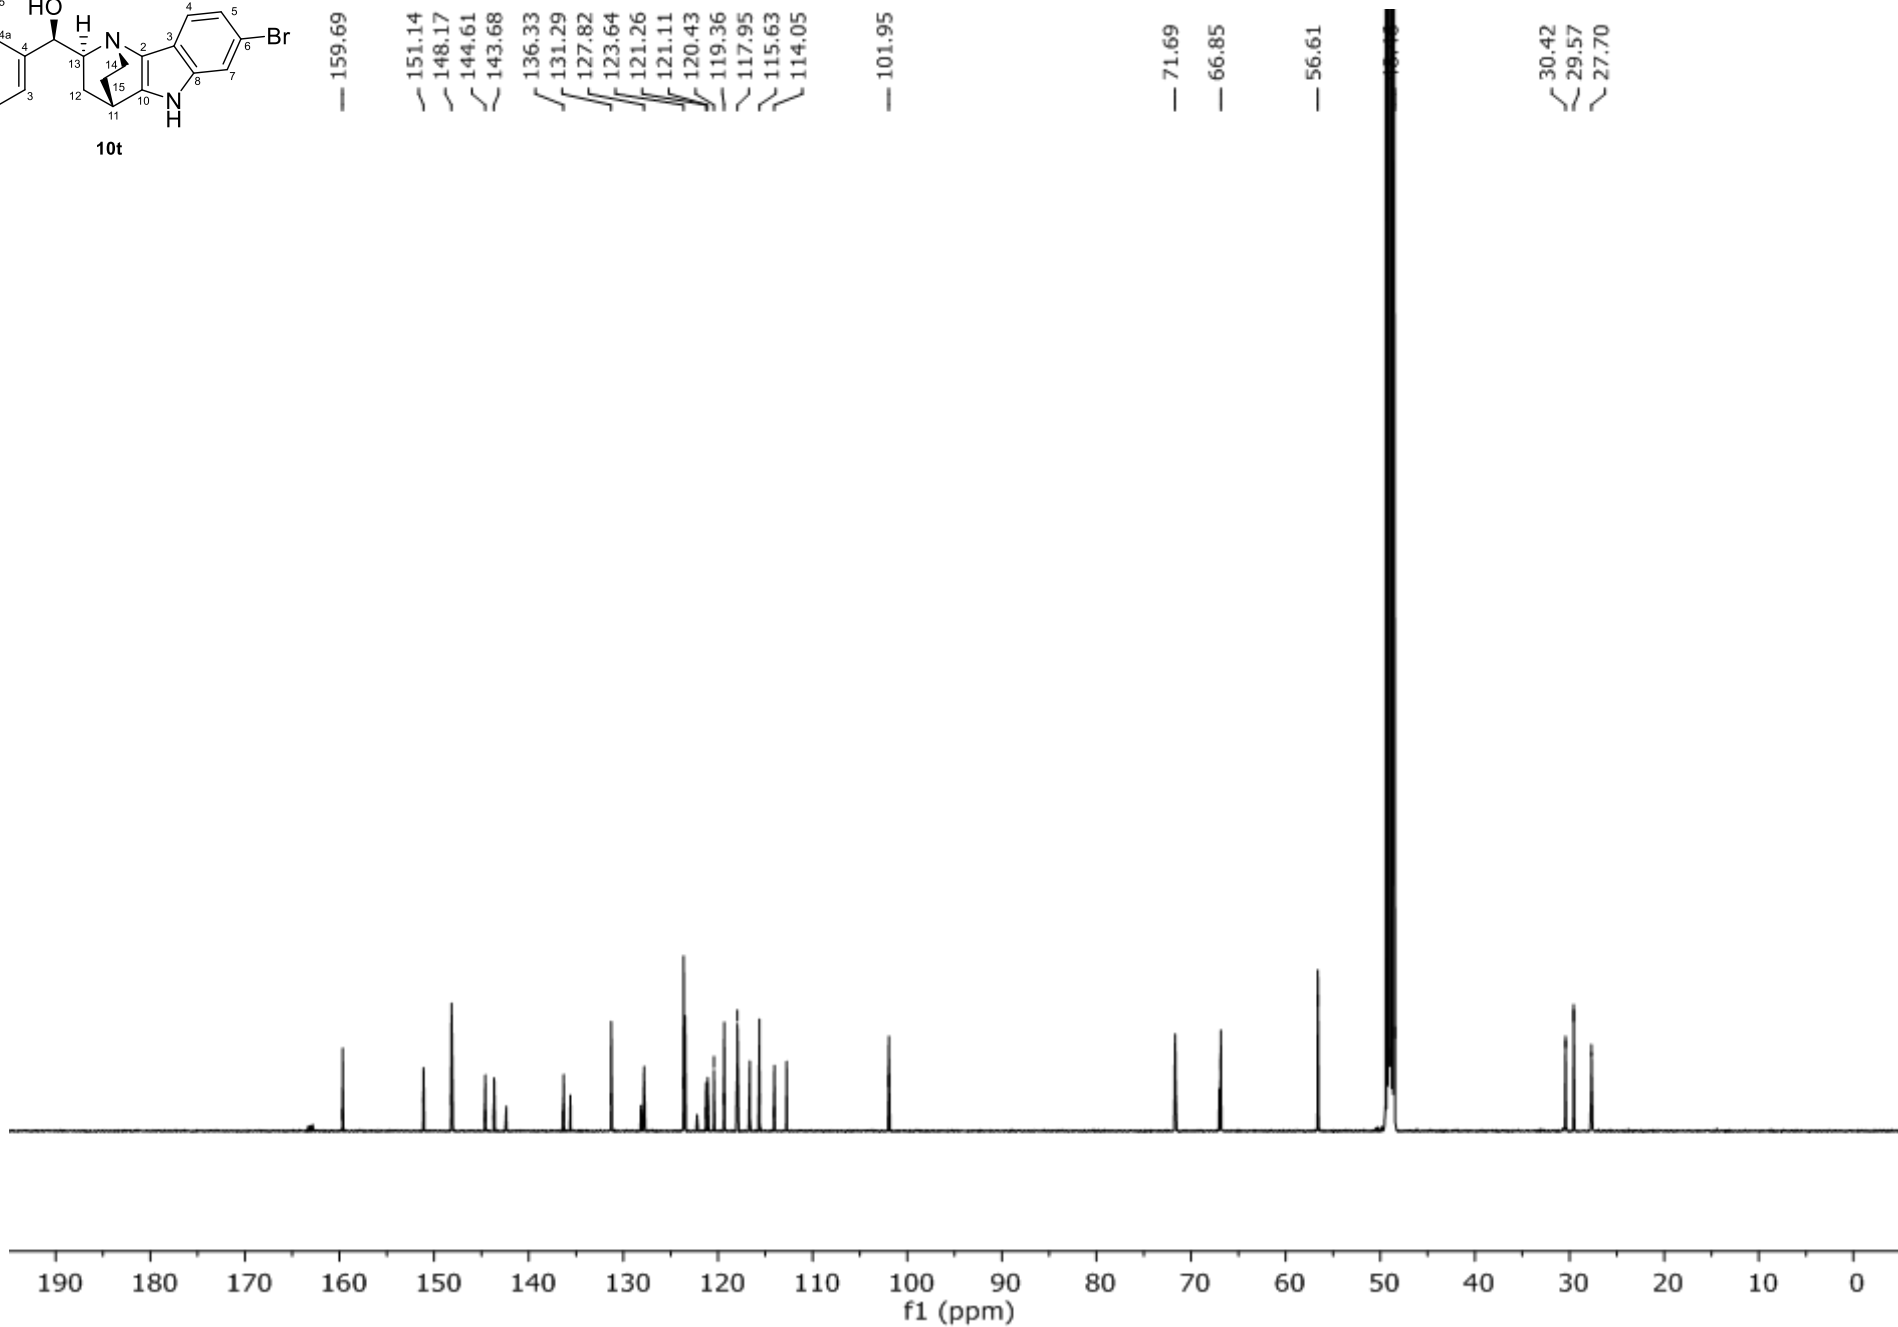



248

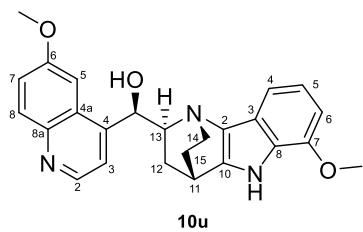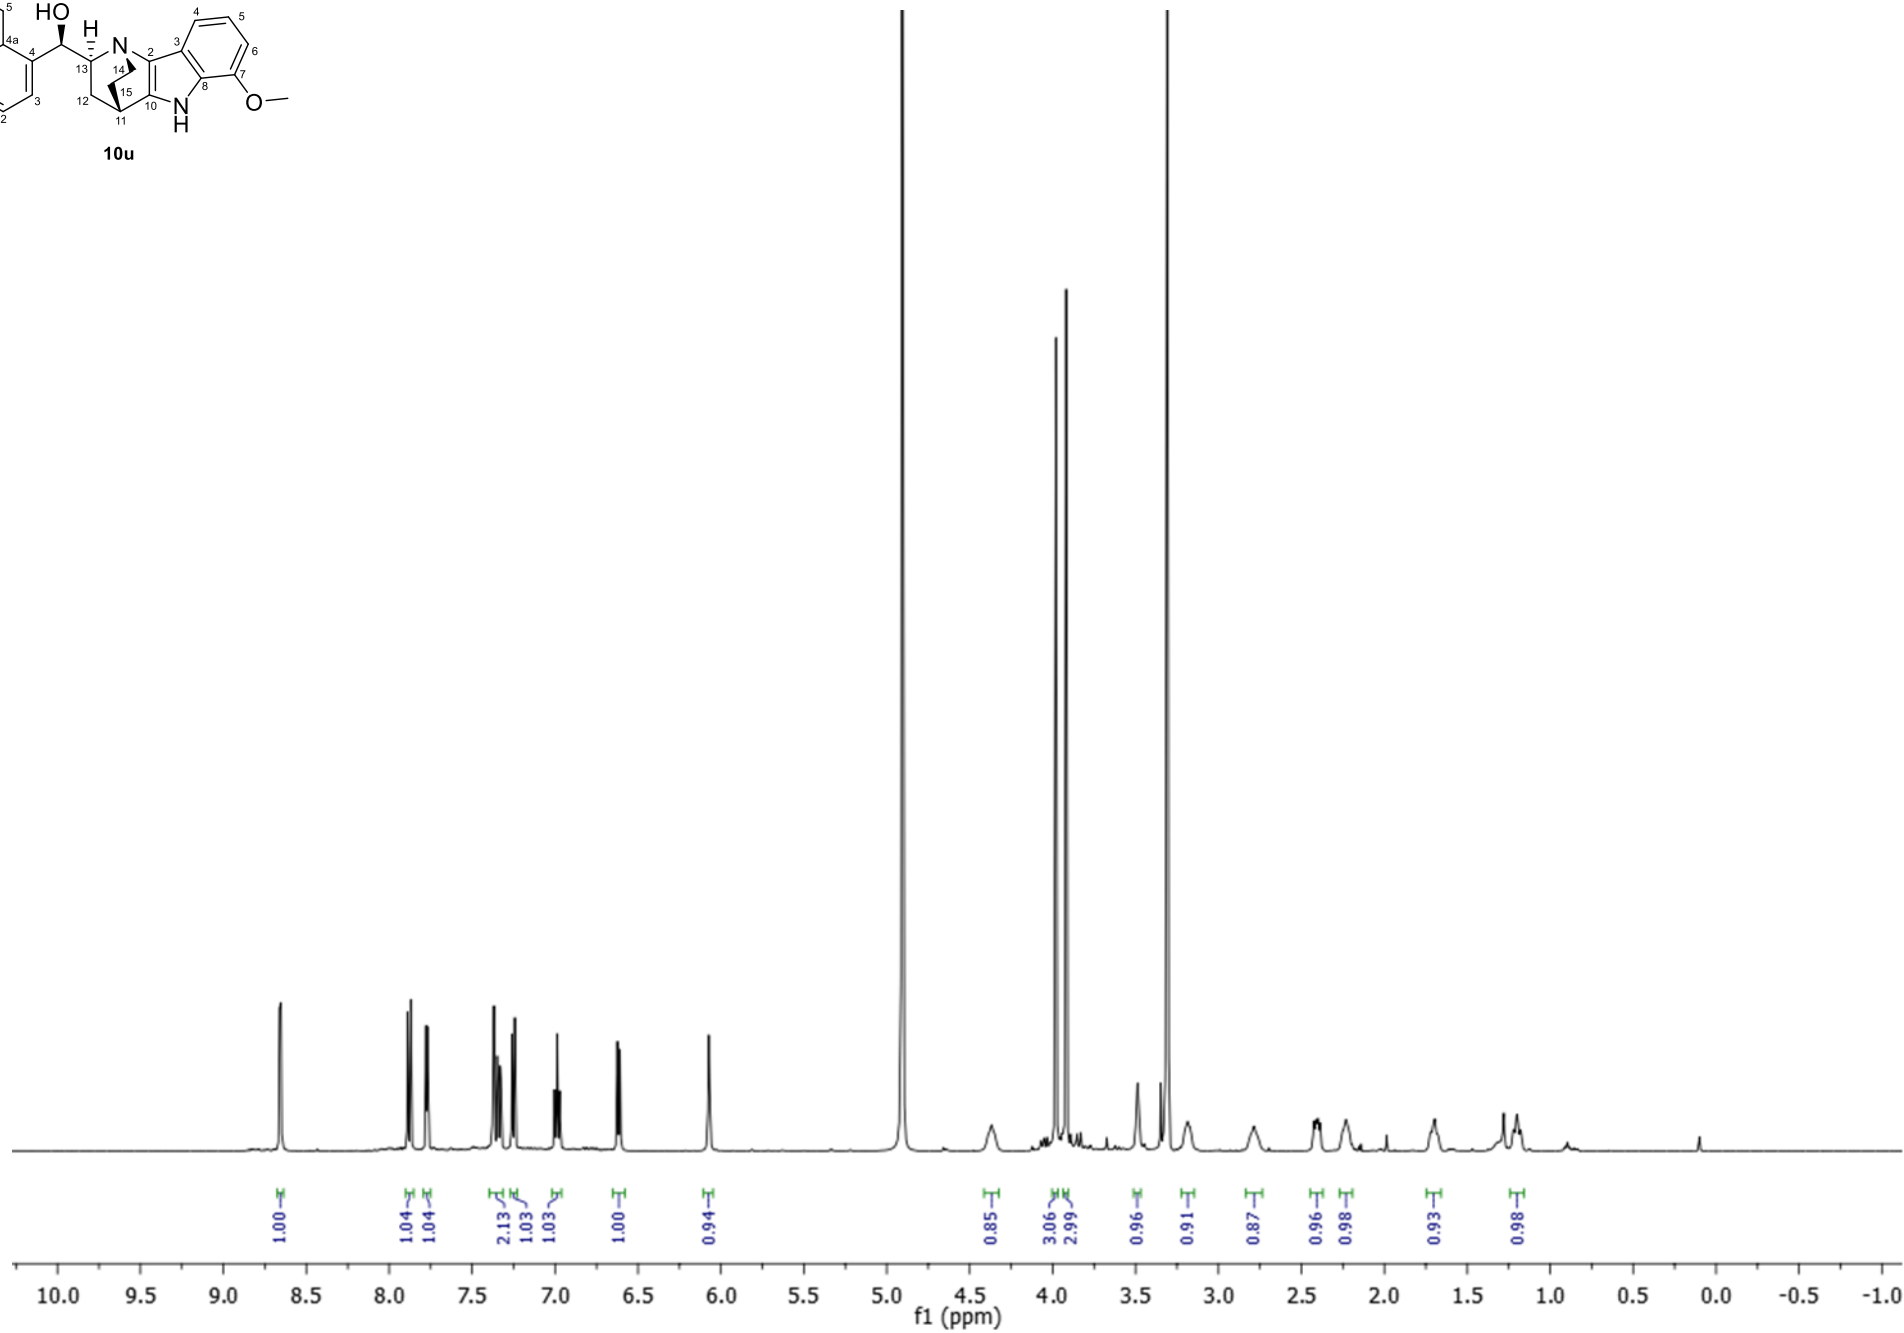

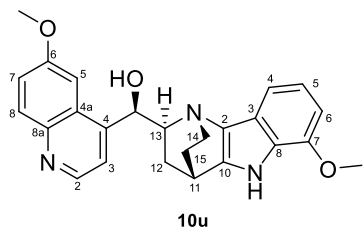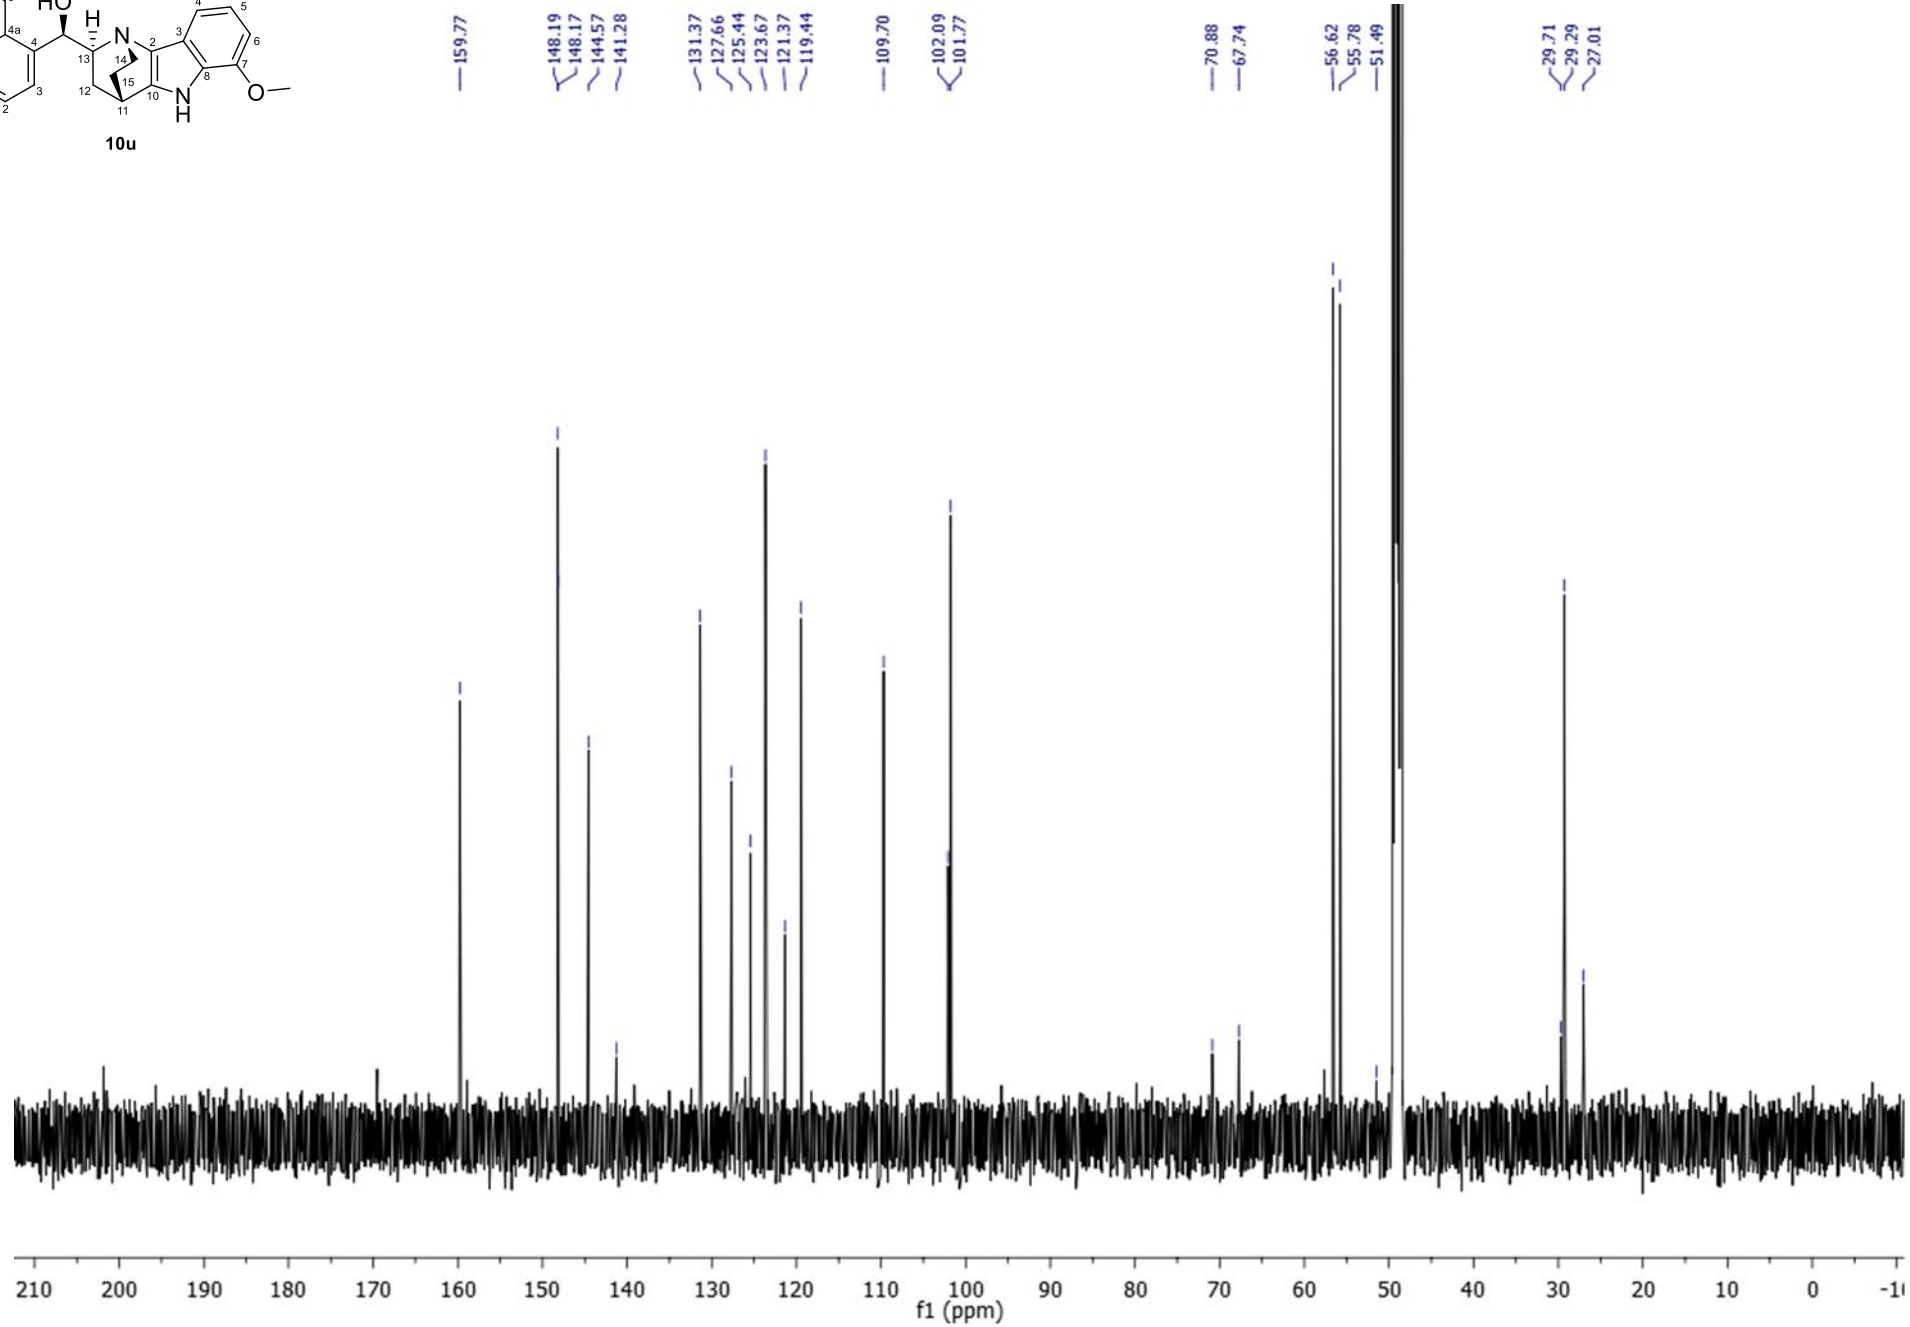

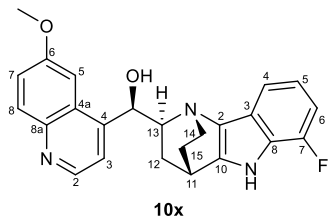

250

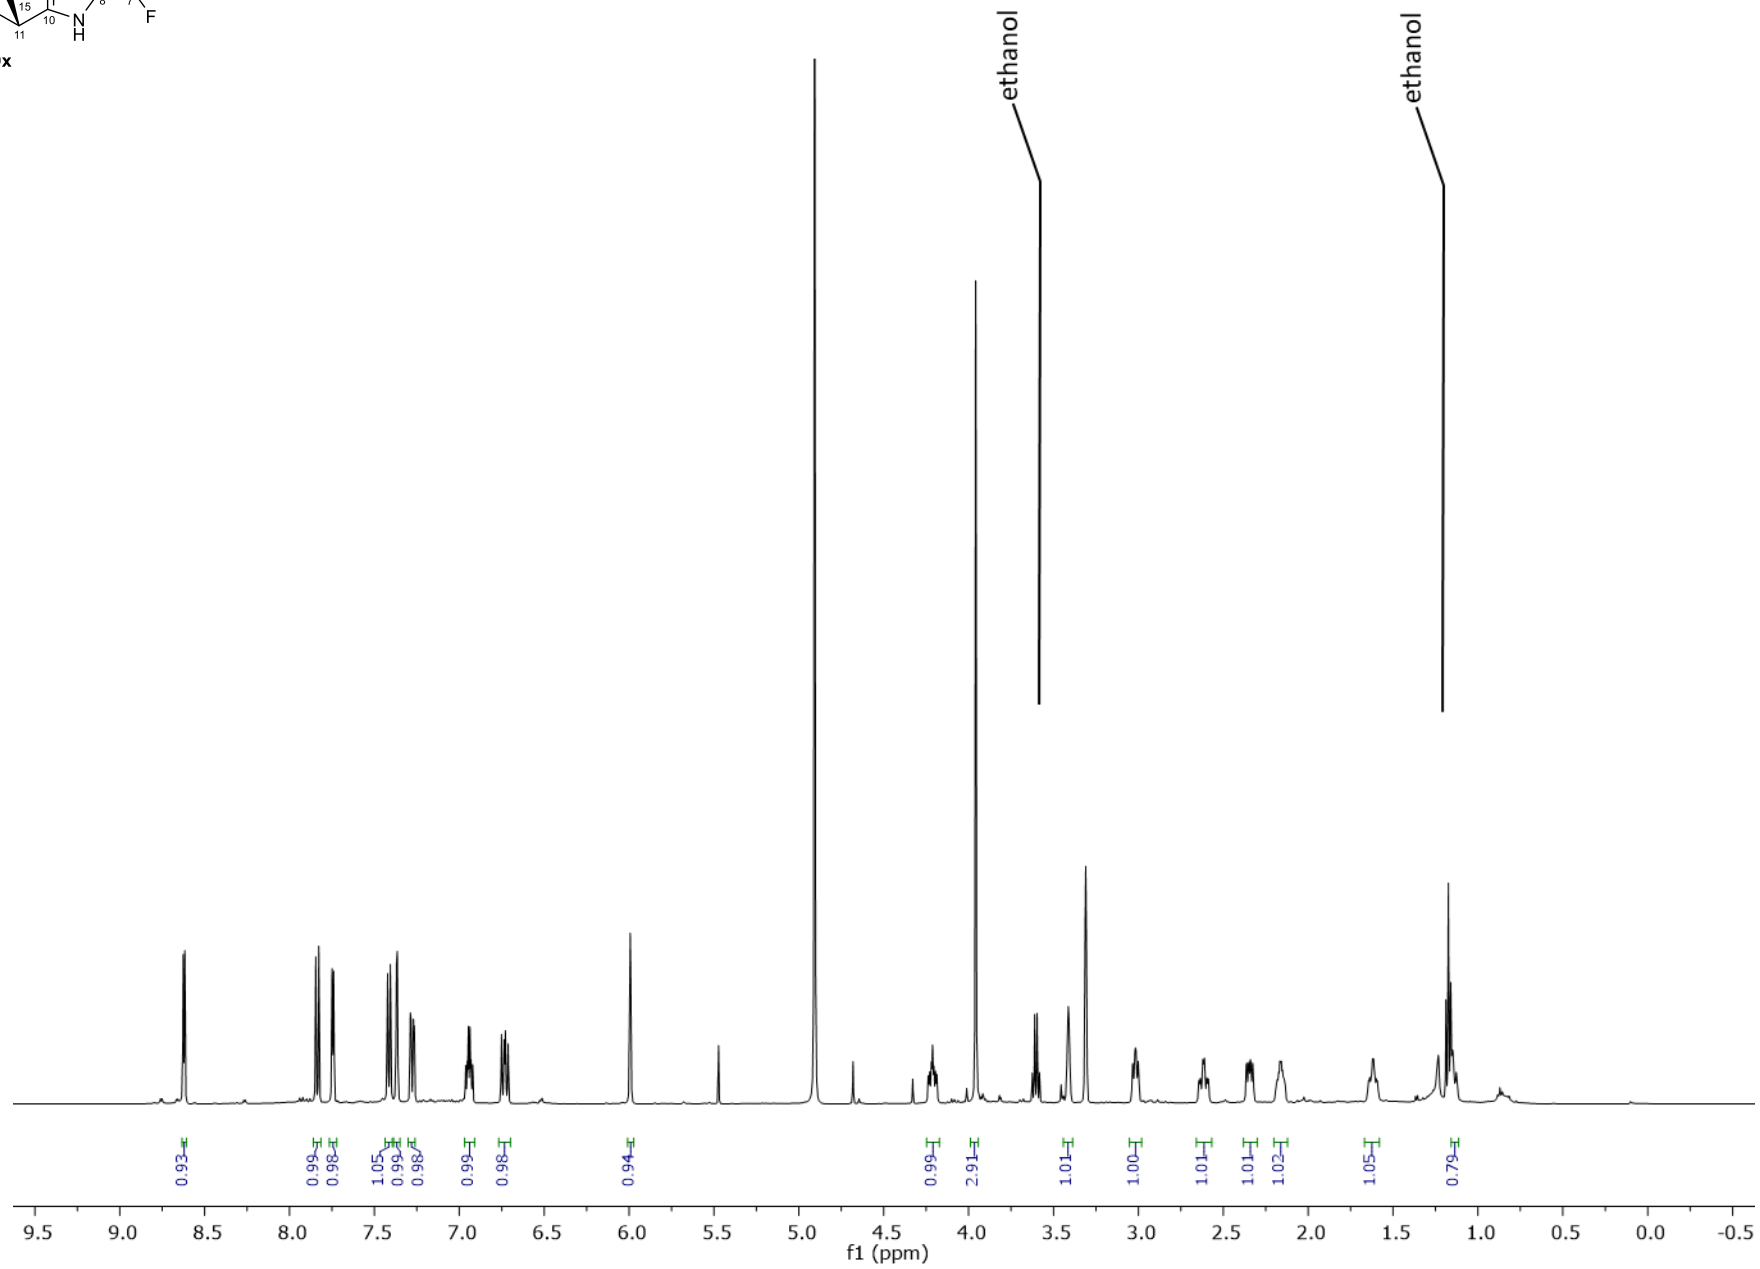

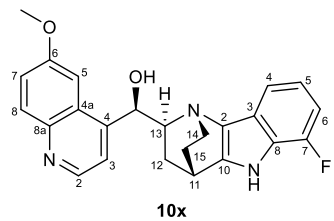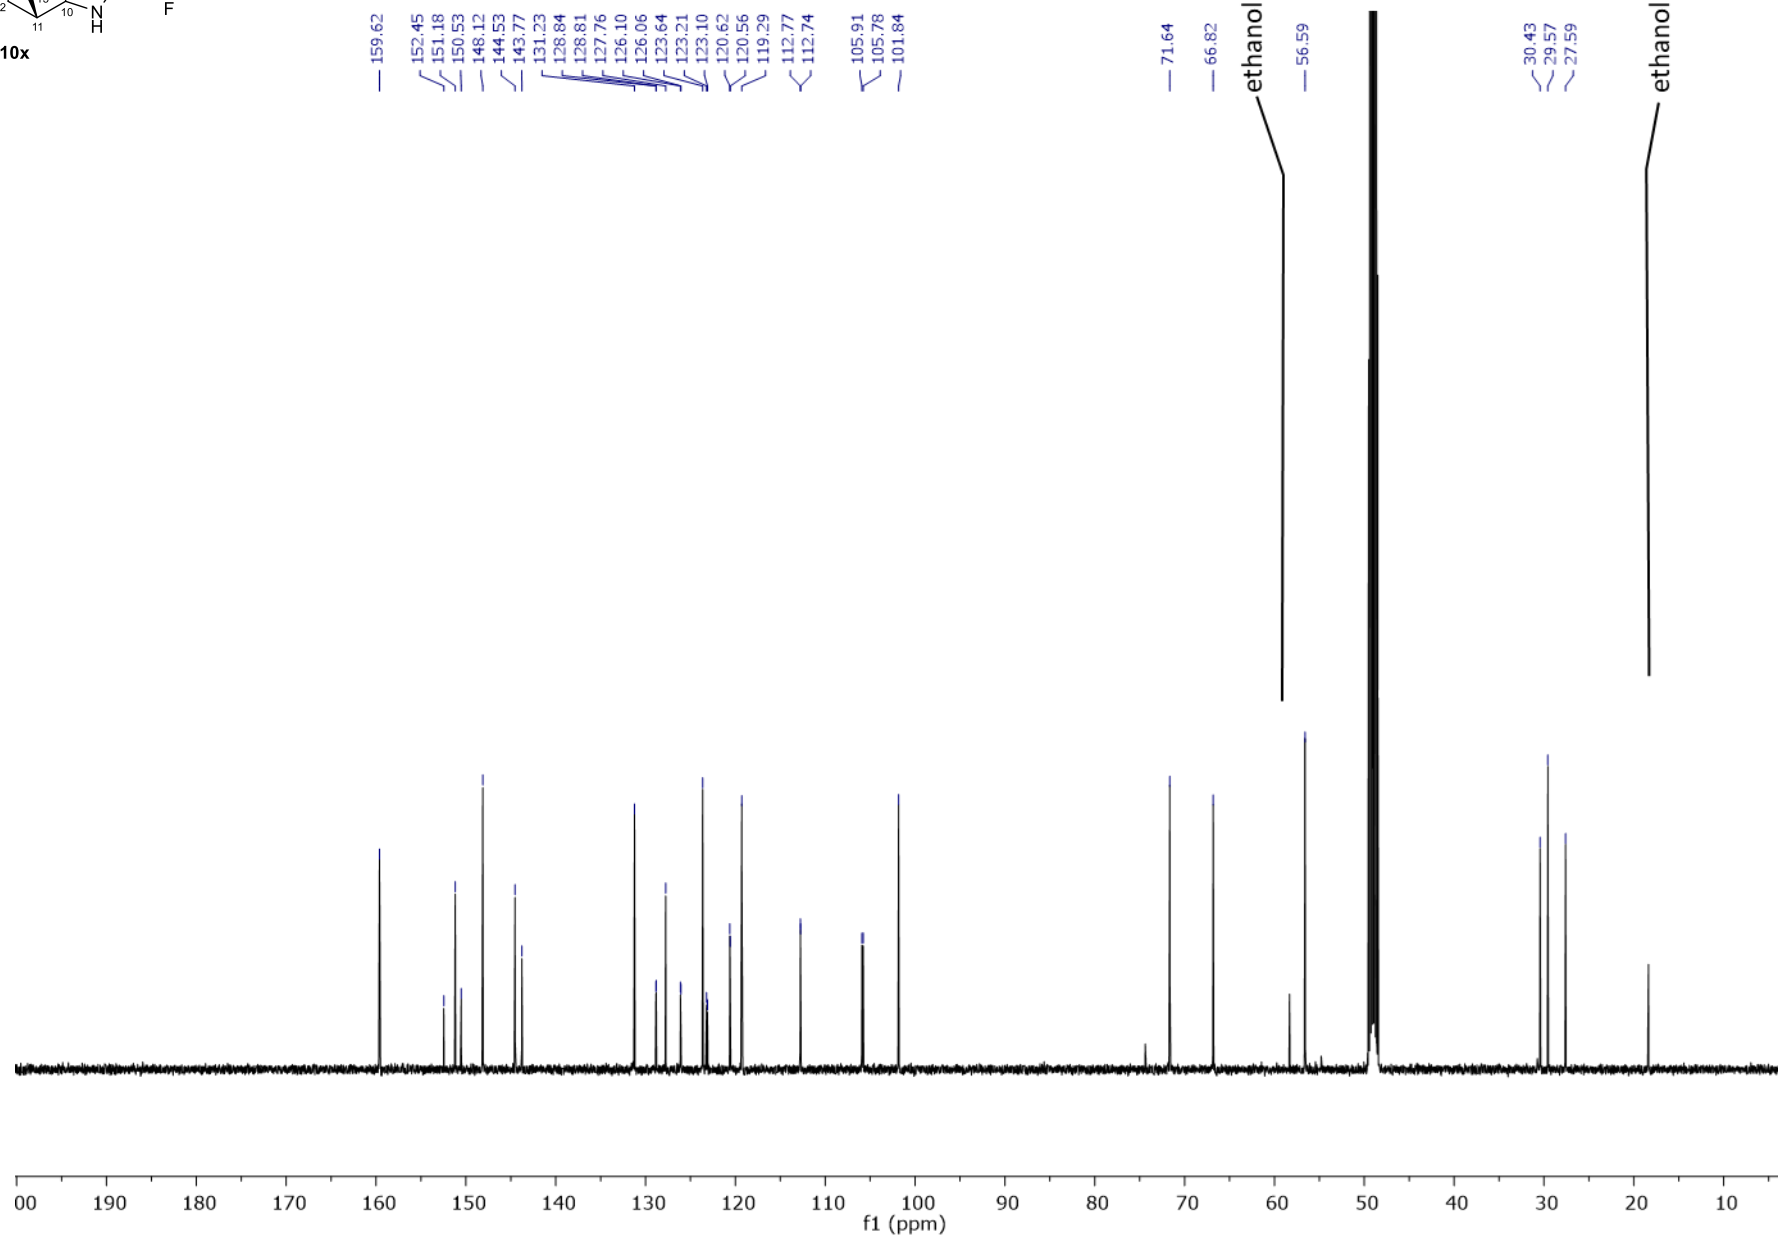

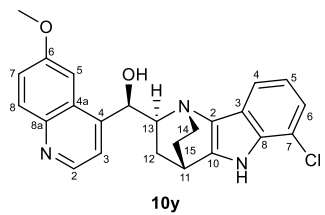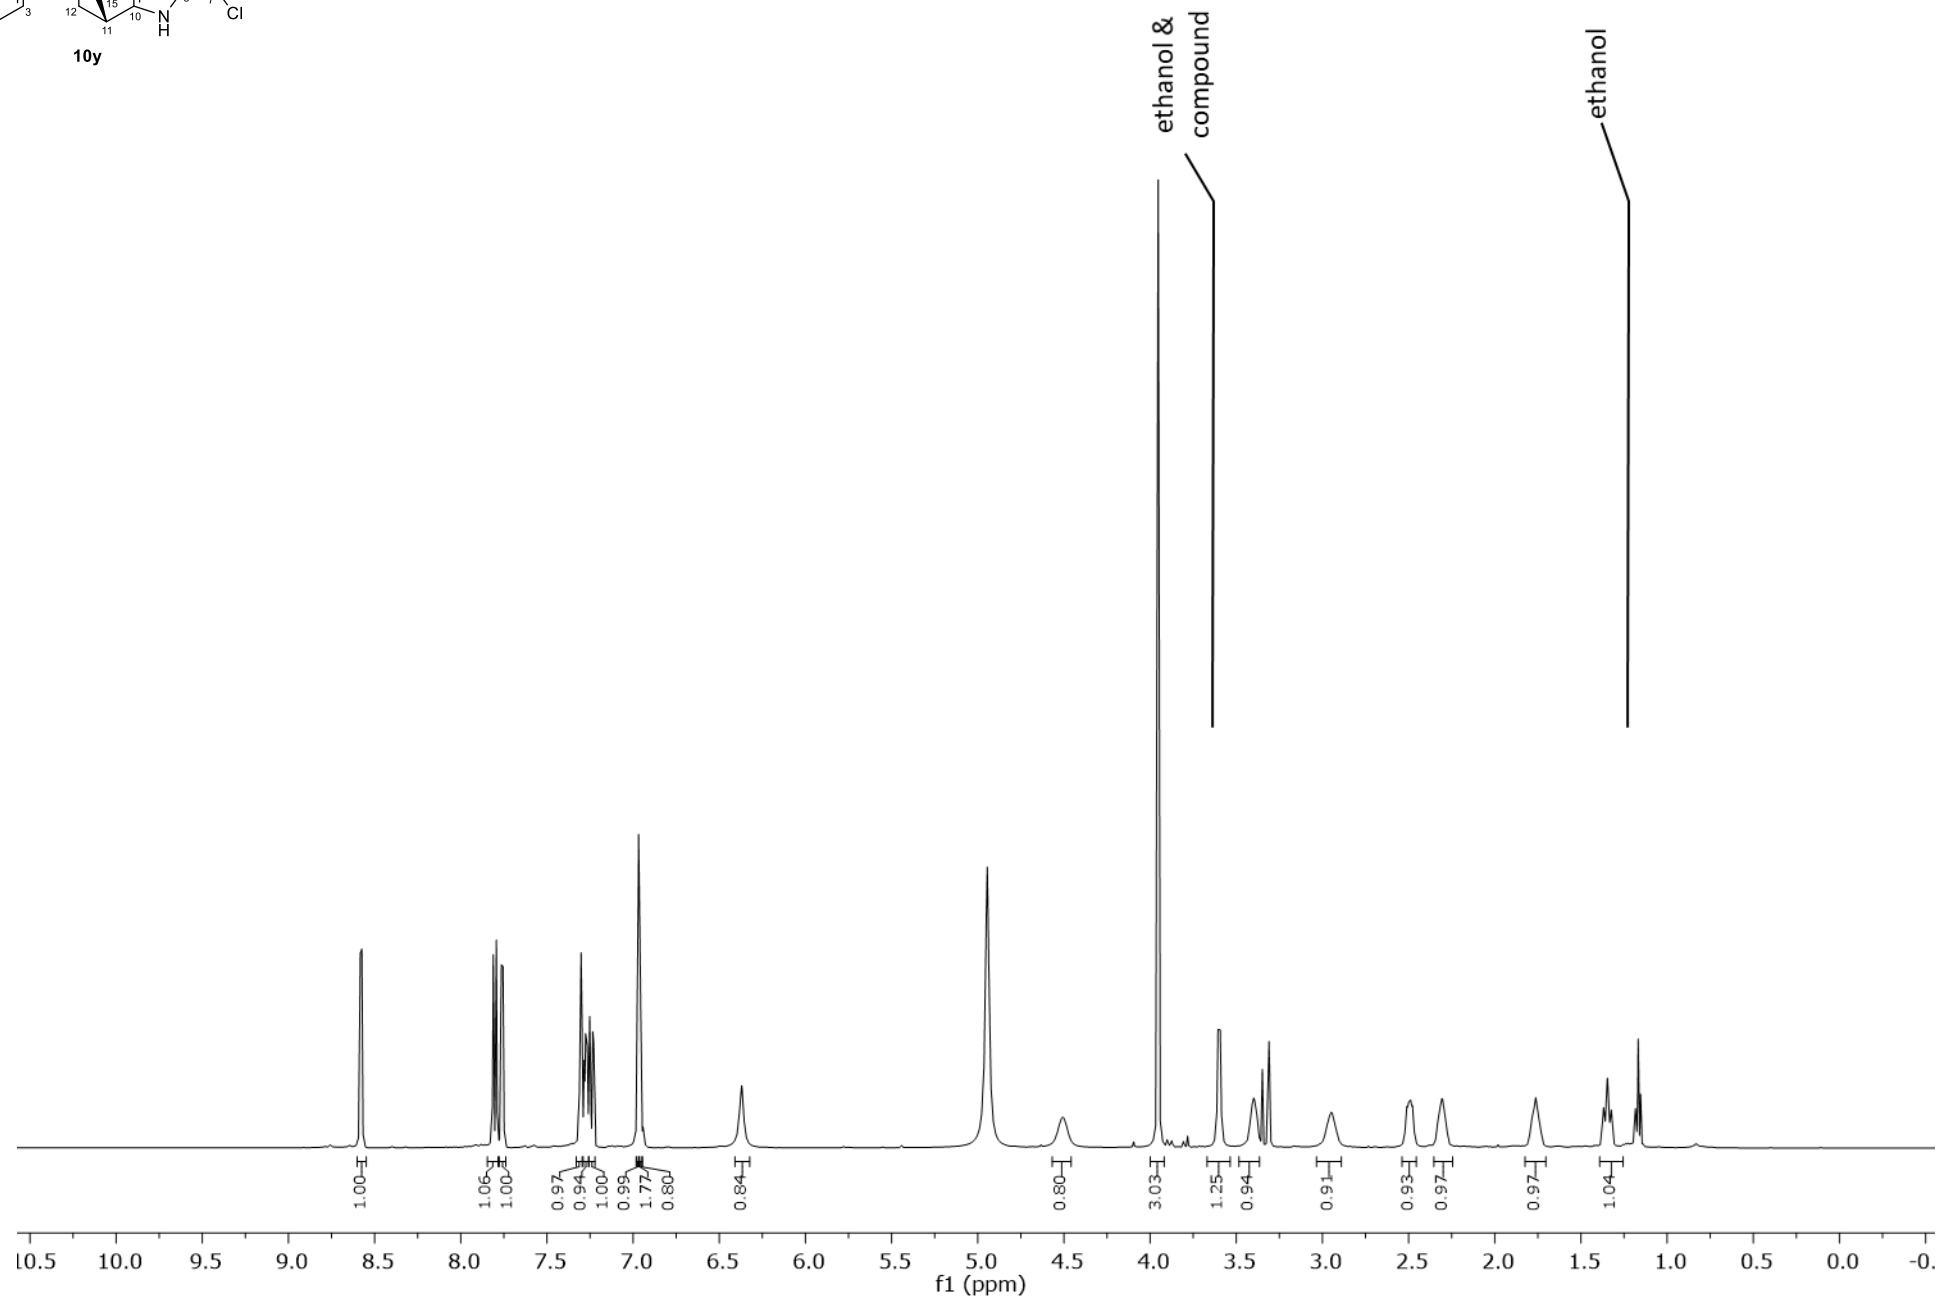

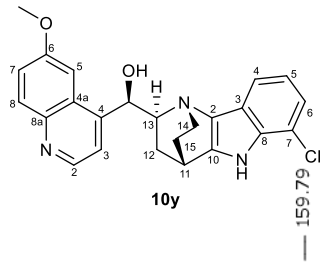

— 149.07  
— 148.01  
— 144.33  
— 142.90

— 136.27  
— 131.27  
— 127.60  
— 123.70  
— 122.88  
— 122.66  
— 121.37  
— 119.93  
— 118.64

— 112.06

— 101.43

— 69.52  
— 68.93

— ethanol

— 56.68

— 51.59

— 28.78  
— 27.83  
— 26.46

— ethanol

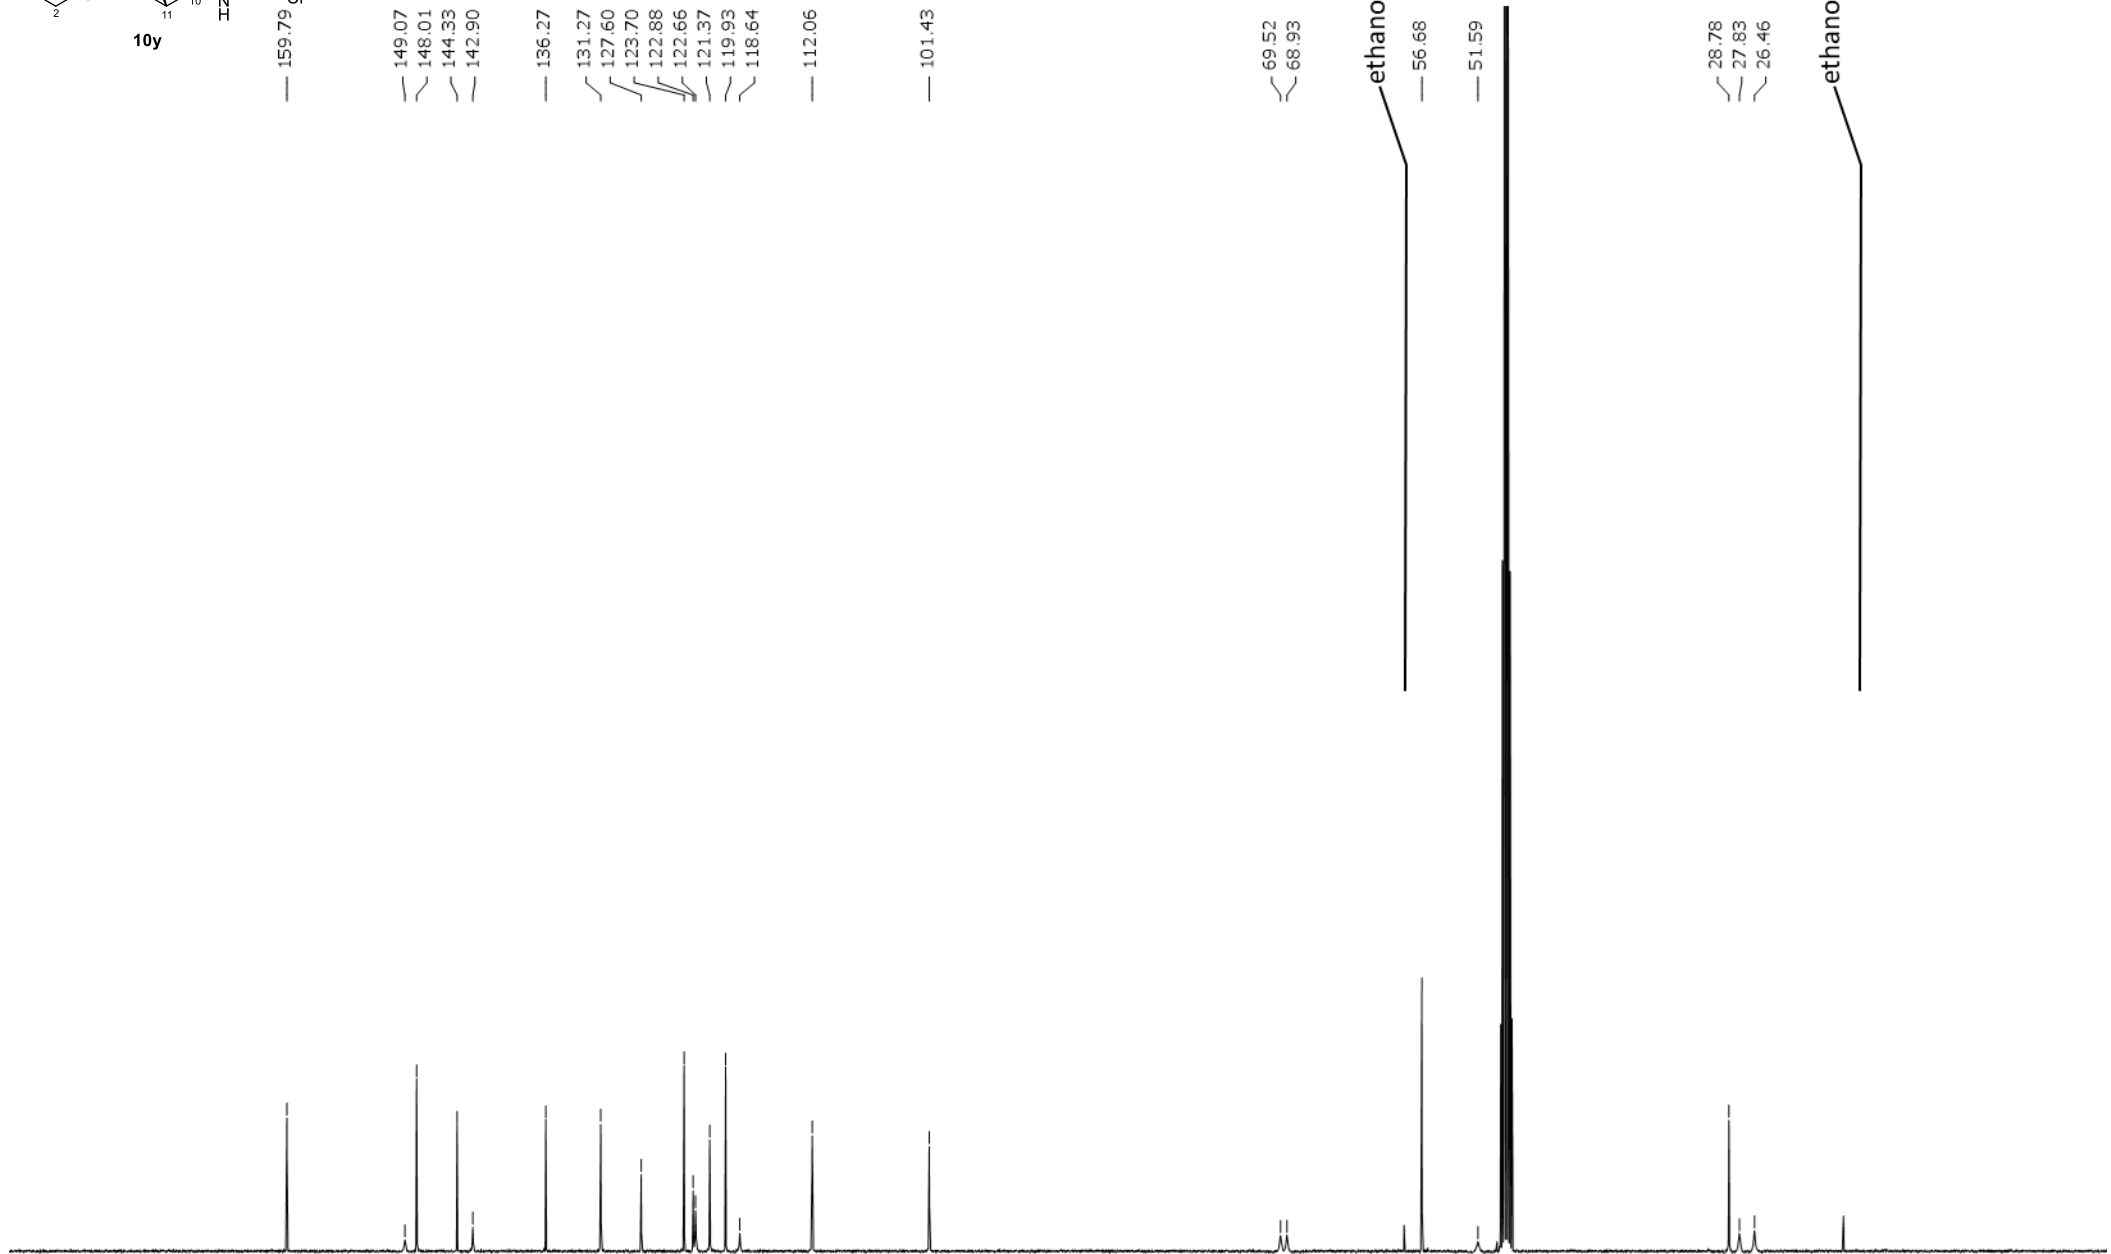

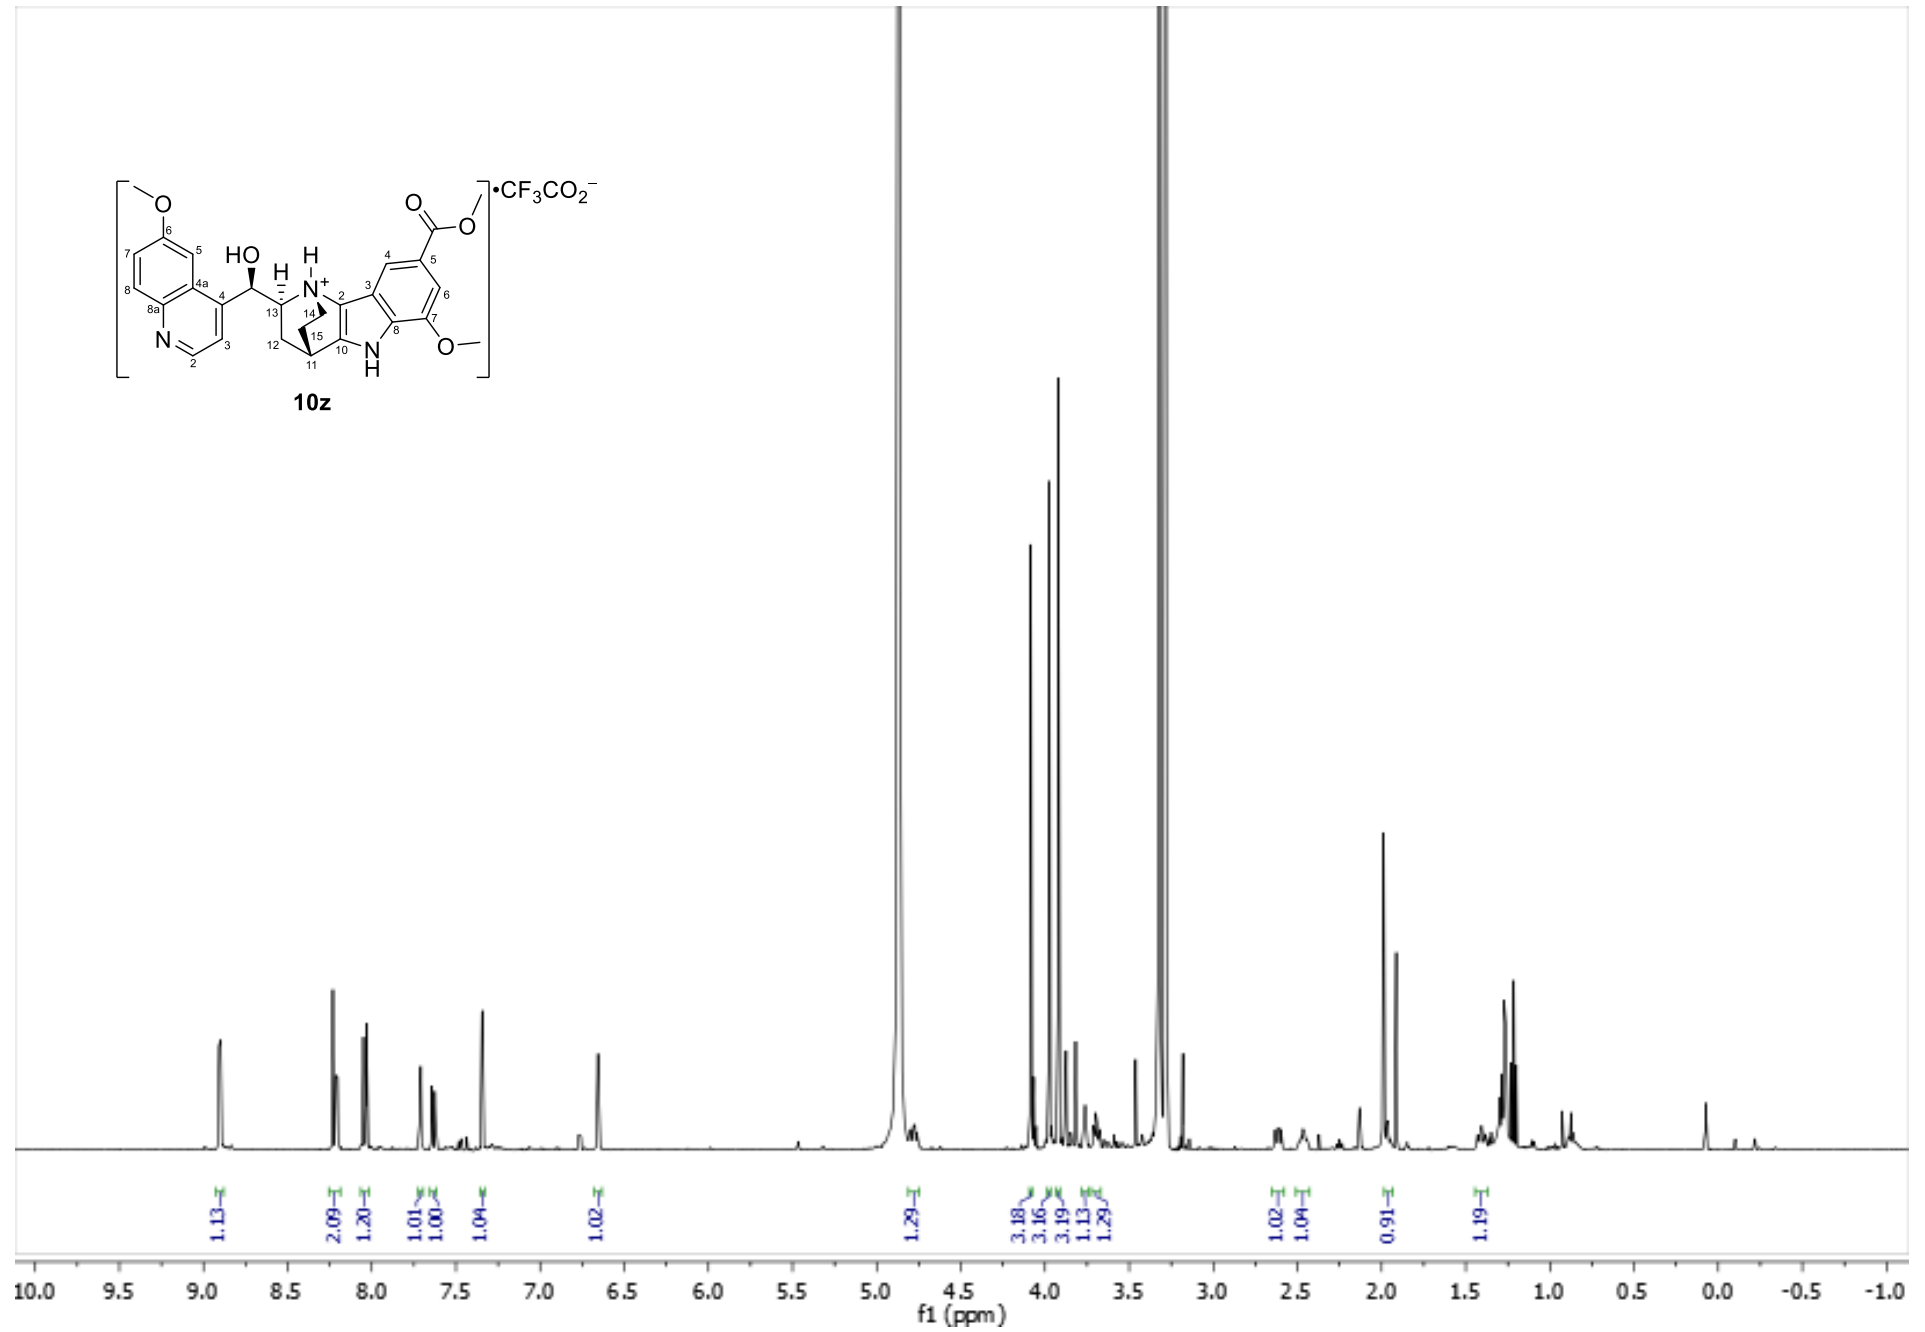

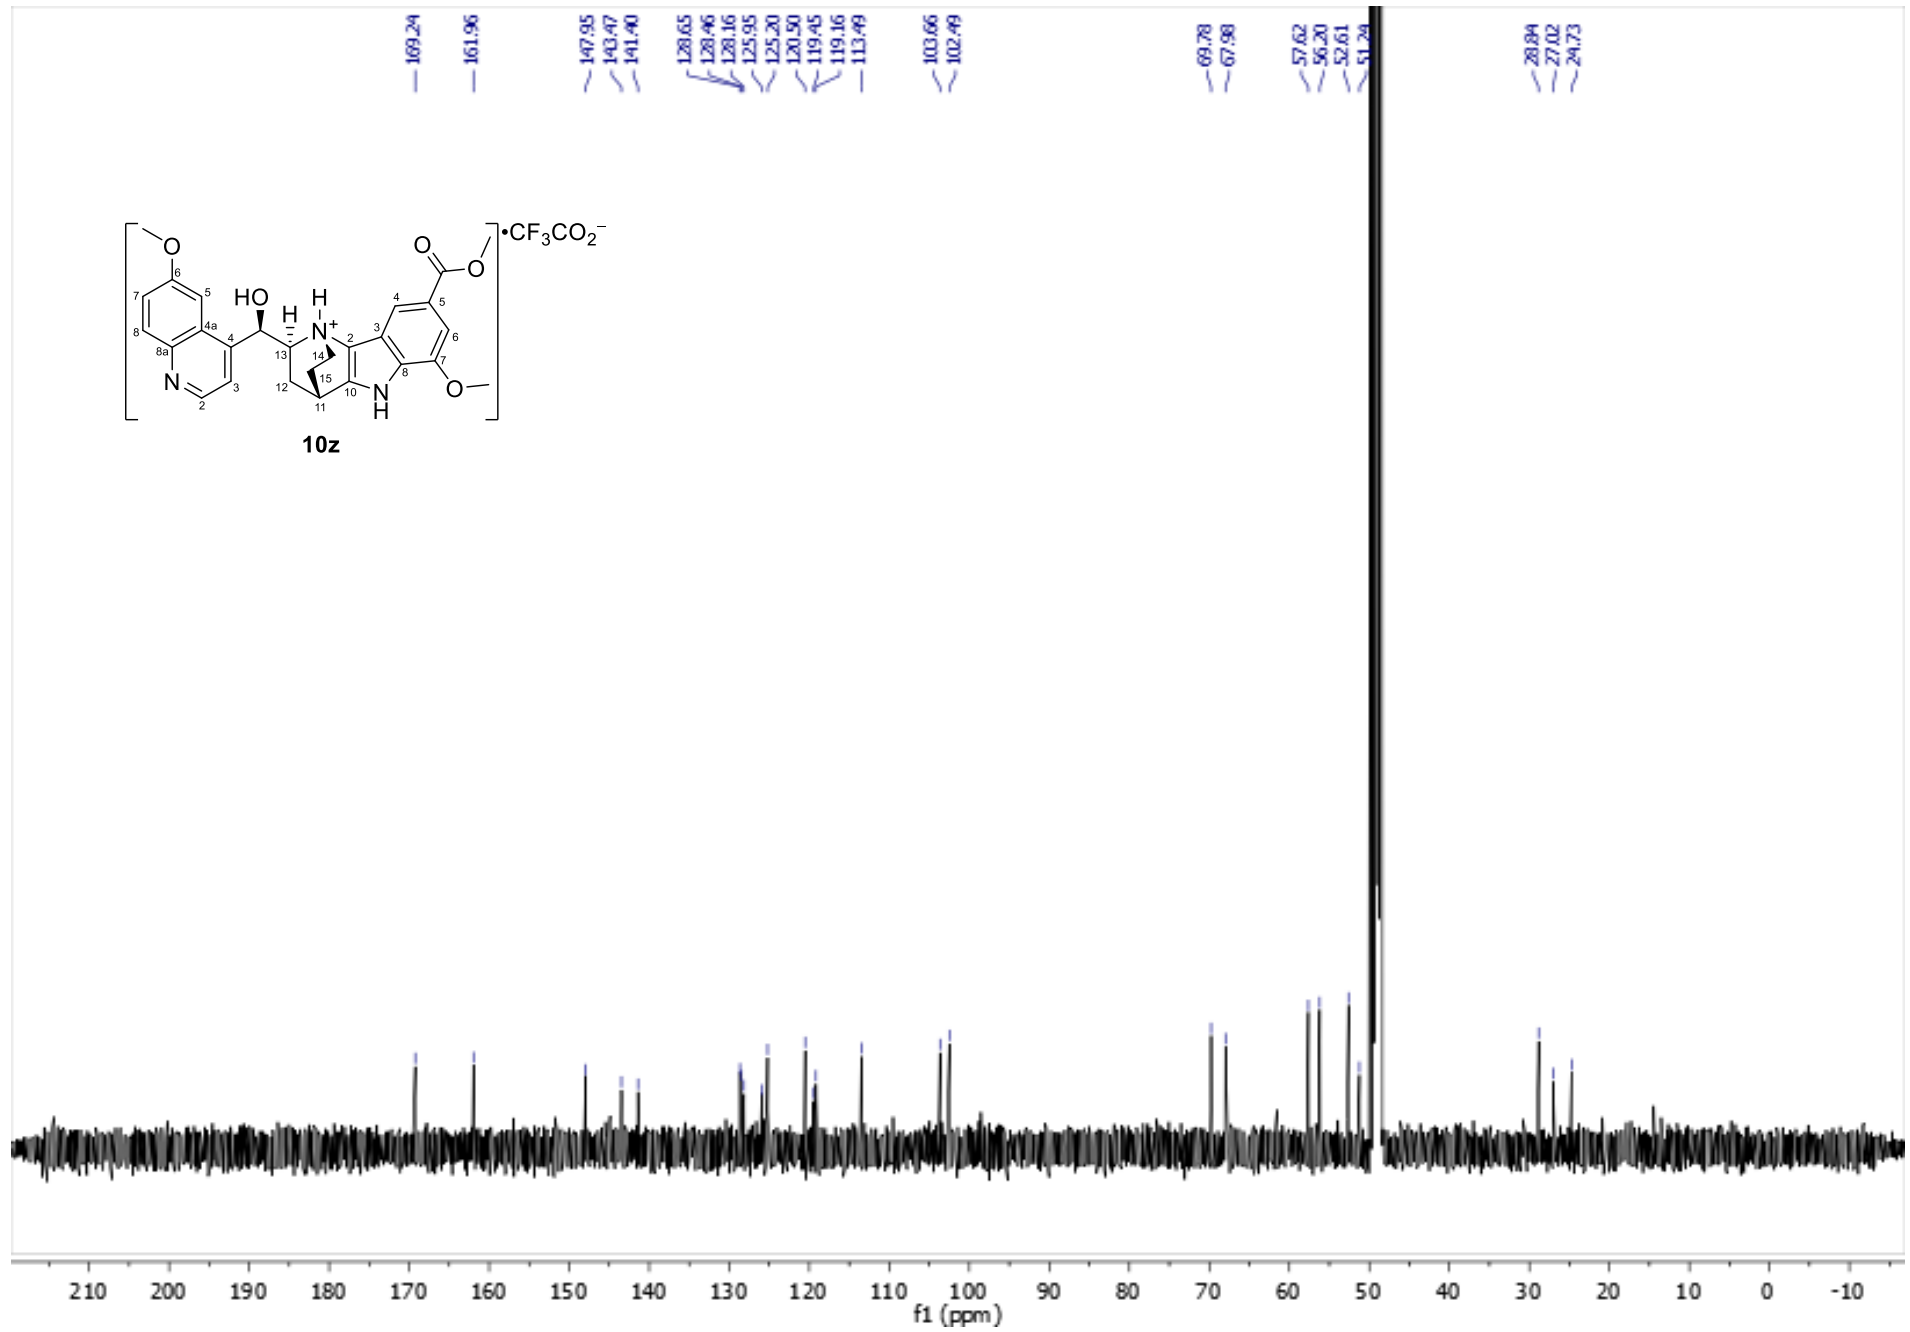



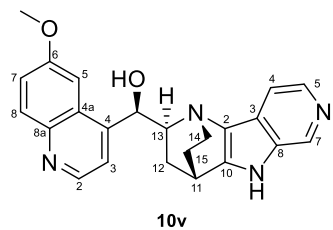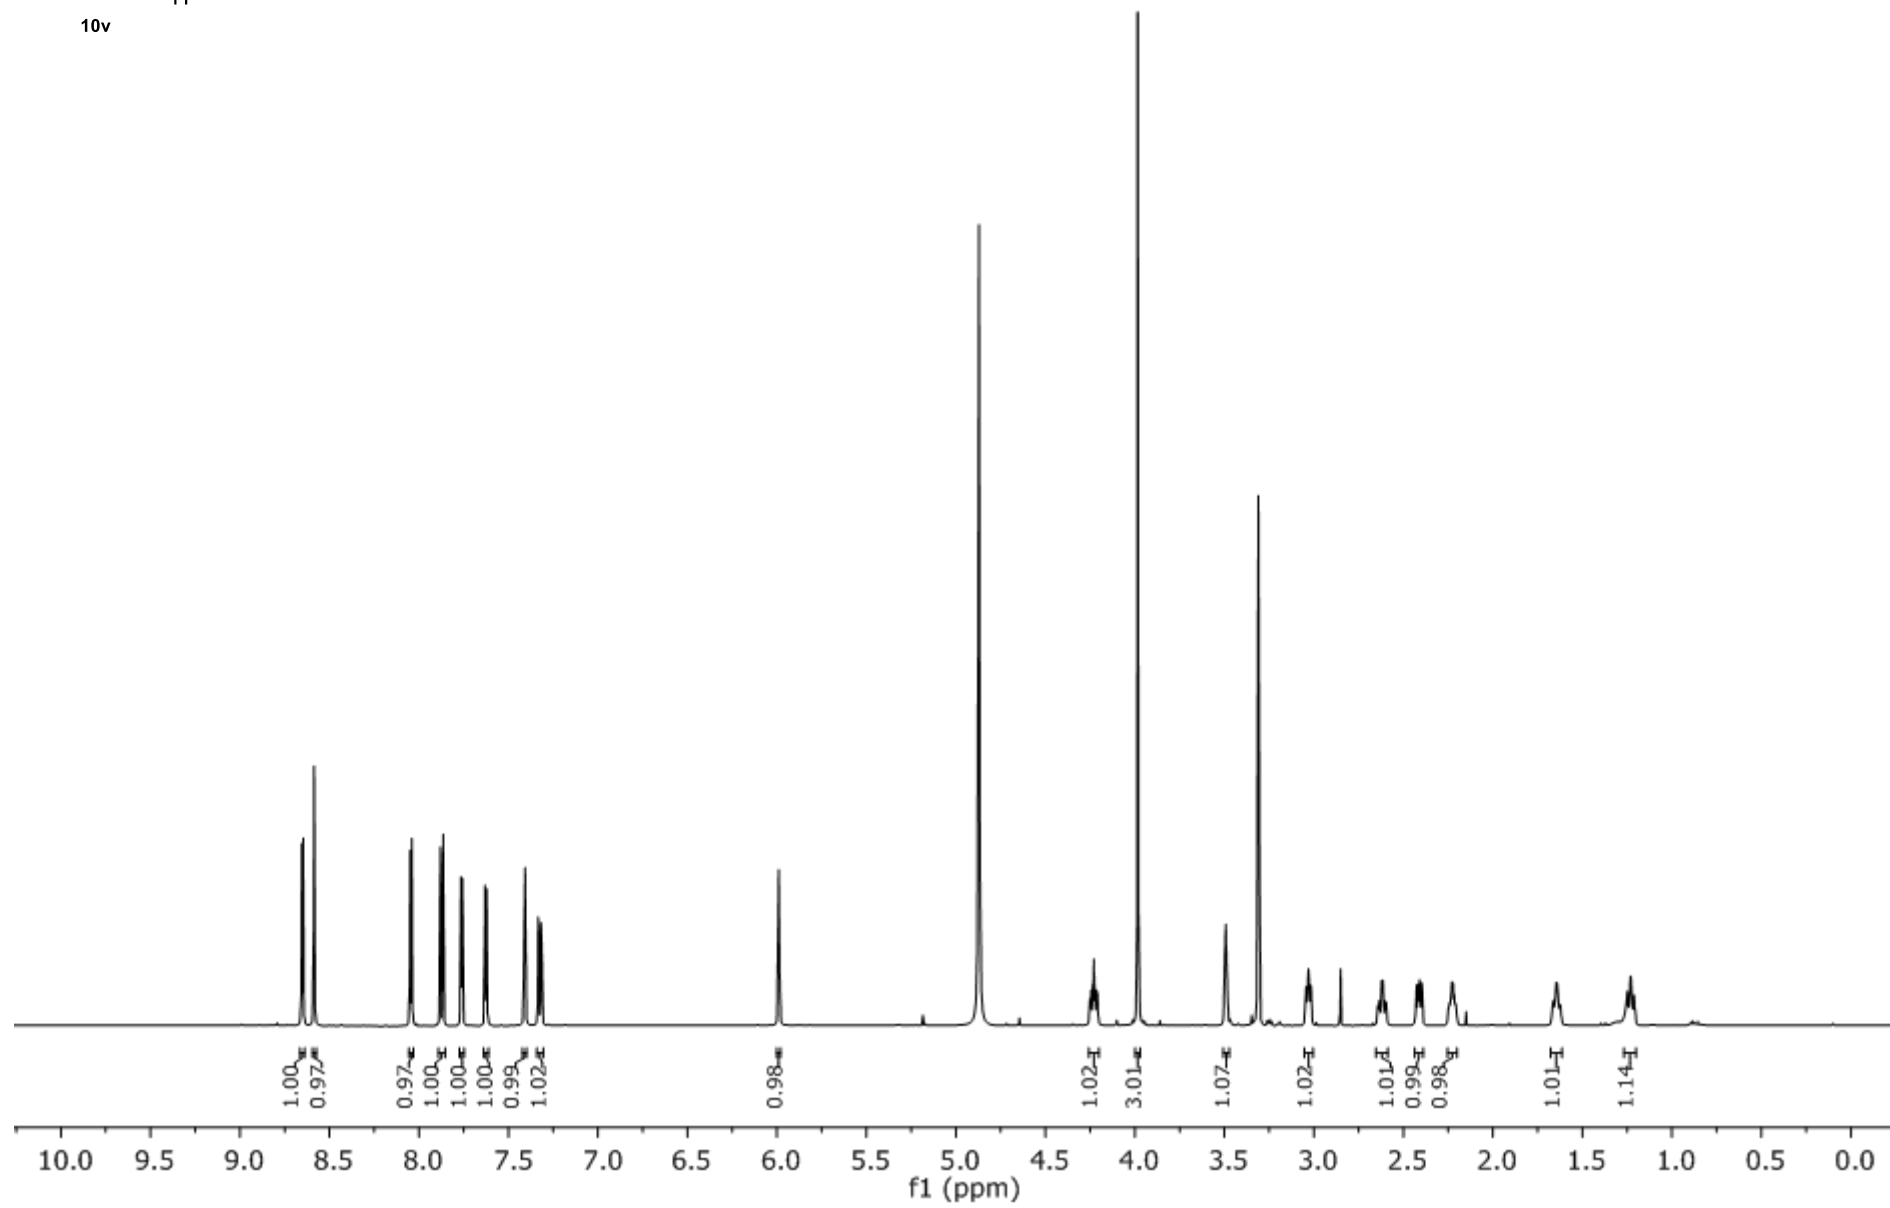

257

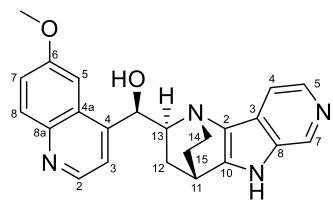

10v

- 159.70
- 150.97
- 149.88
- 148.20
- 144.64
- 138.08
- 134.36
- 132.47
- 131.34
- 127.88
- 127.84
- 126.78
- 123.59
- 119.44
- 111.93

- 101.96

- 71.69
- 66.74

- 56.59

- 46.29

- 30.10
- 29.85
- 27.56

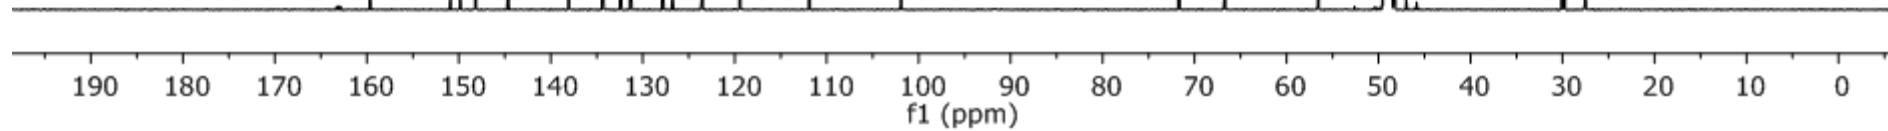

258

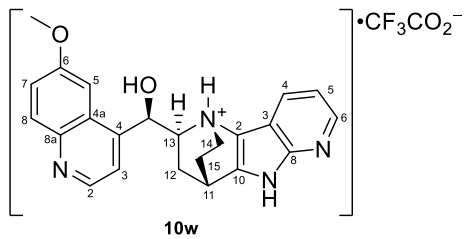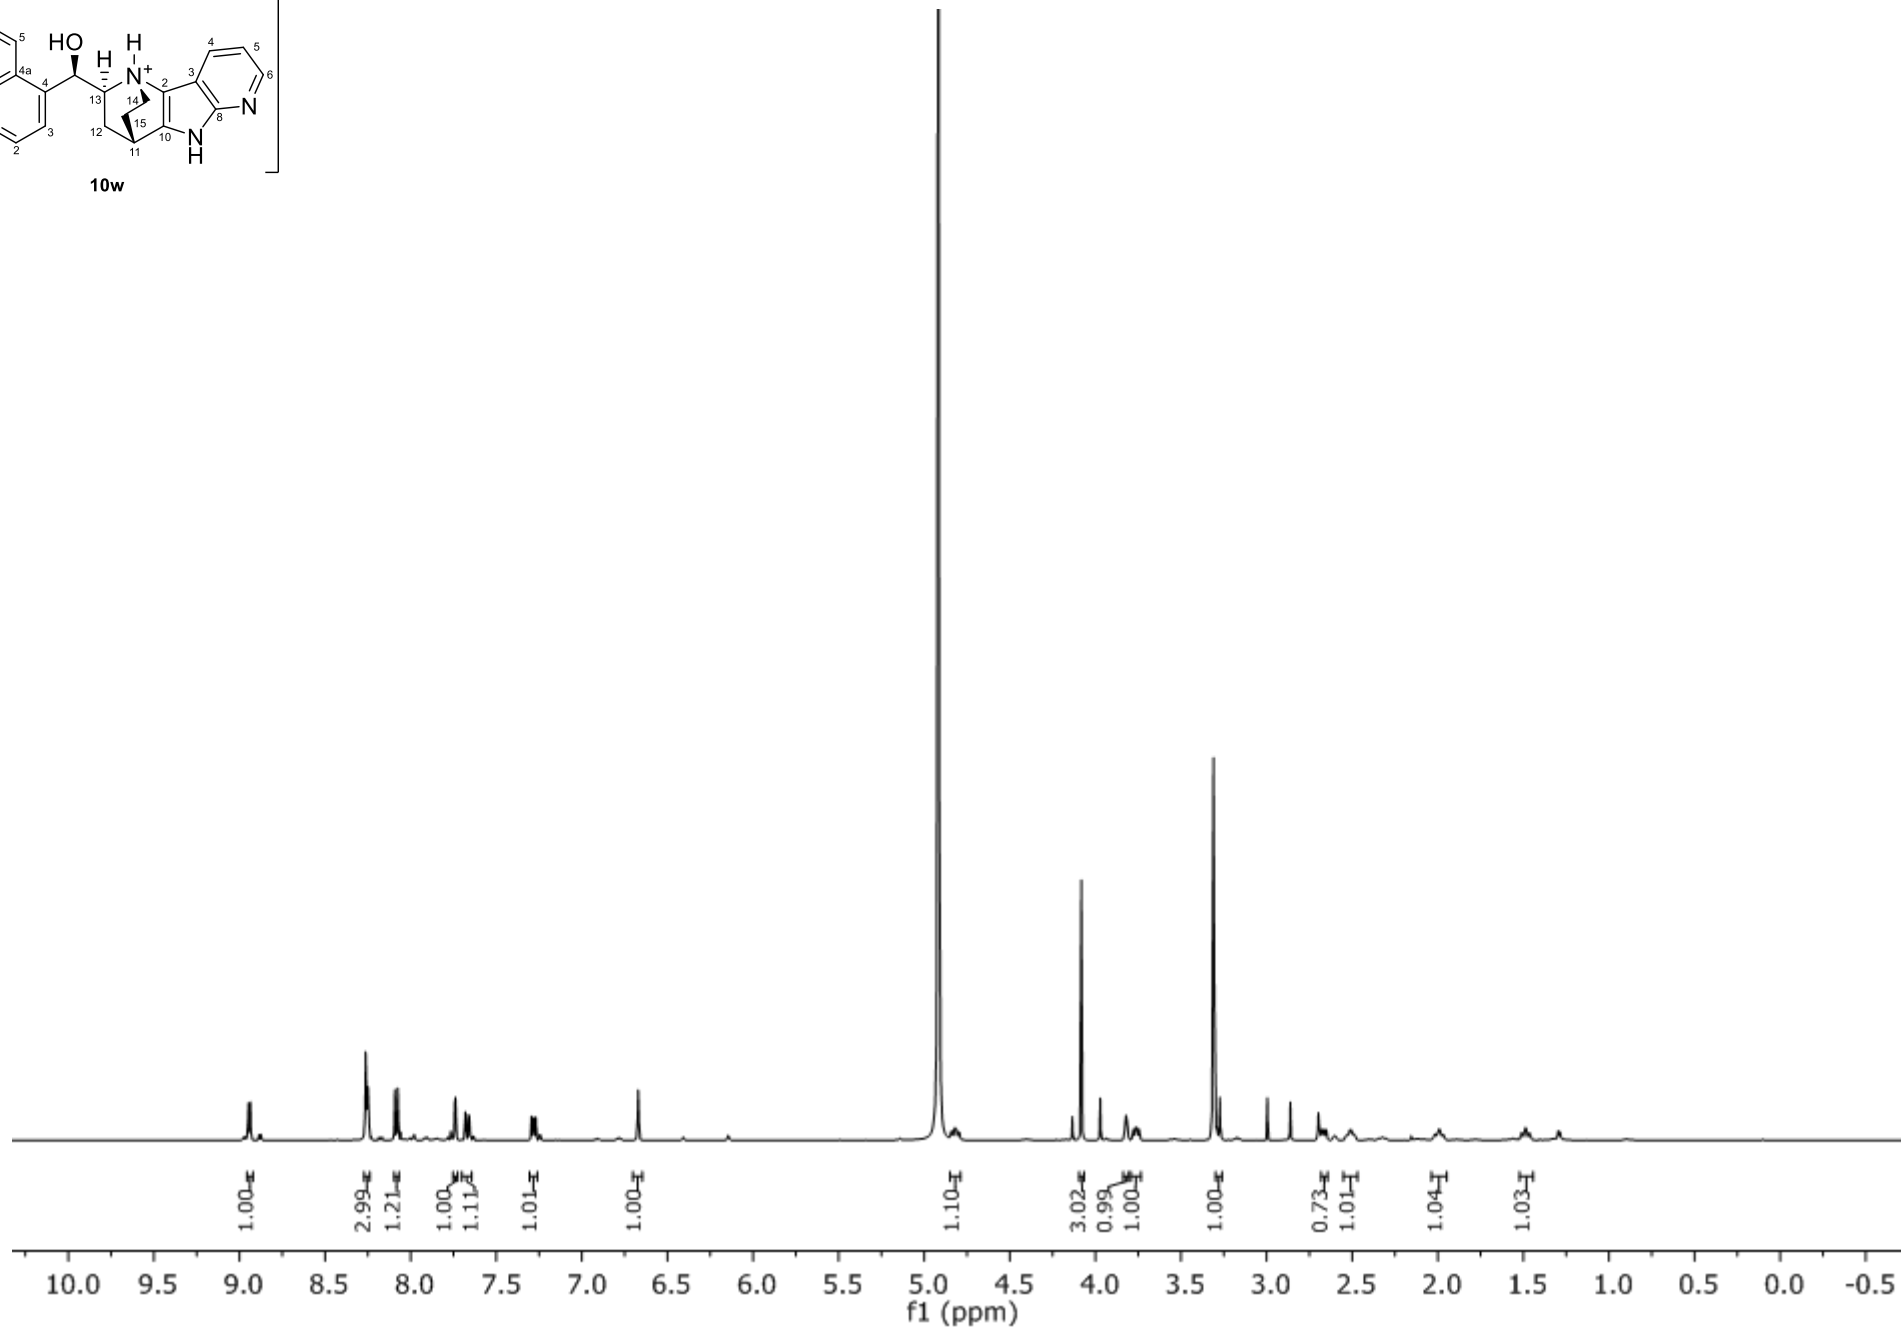

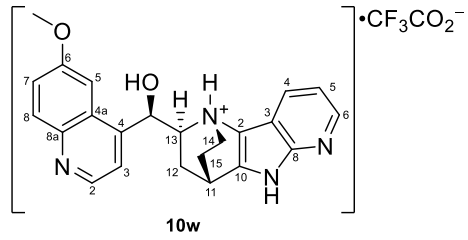

163.22  
162.94  
162.66  
162.37  
161.93  
156.04

146.50  
143.58  
143.43  
141.57  
137.39

128.69  
128.14  
126.57  
125.88  
120.65  
118.39  
116.80  
112.37

102.46

69.21  
67.94

57.46

51.34

28.63  
27.00  
24.86

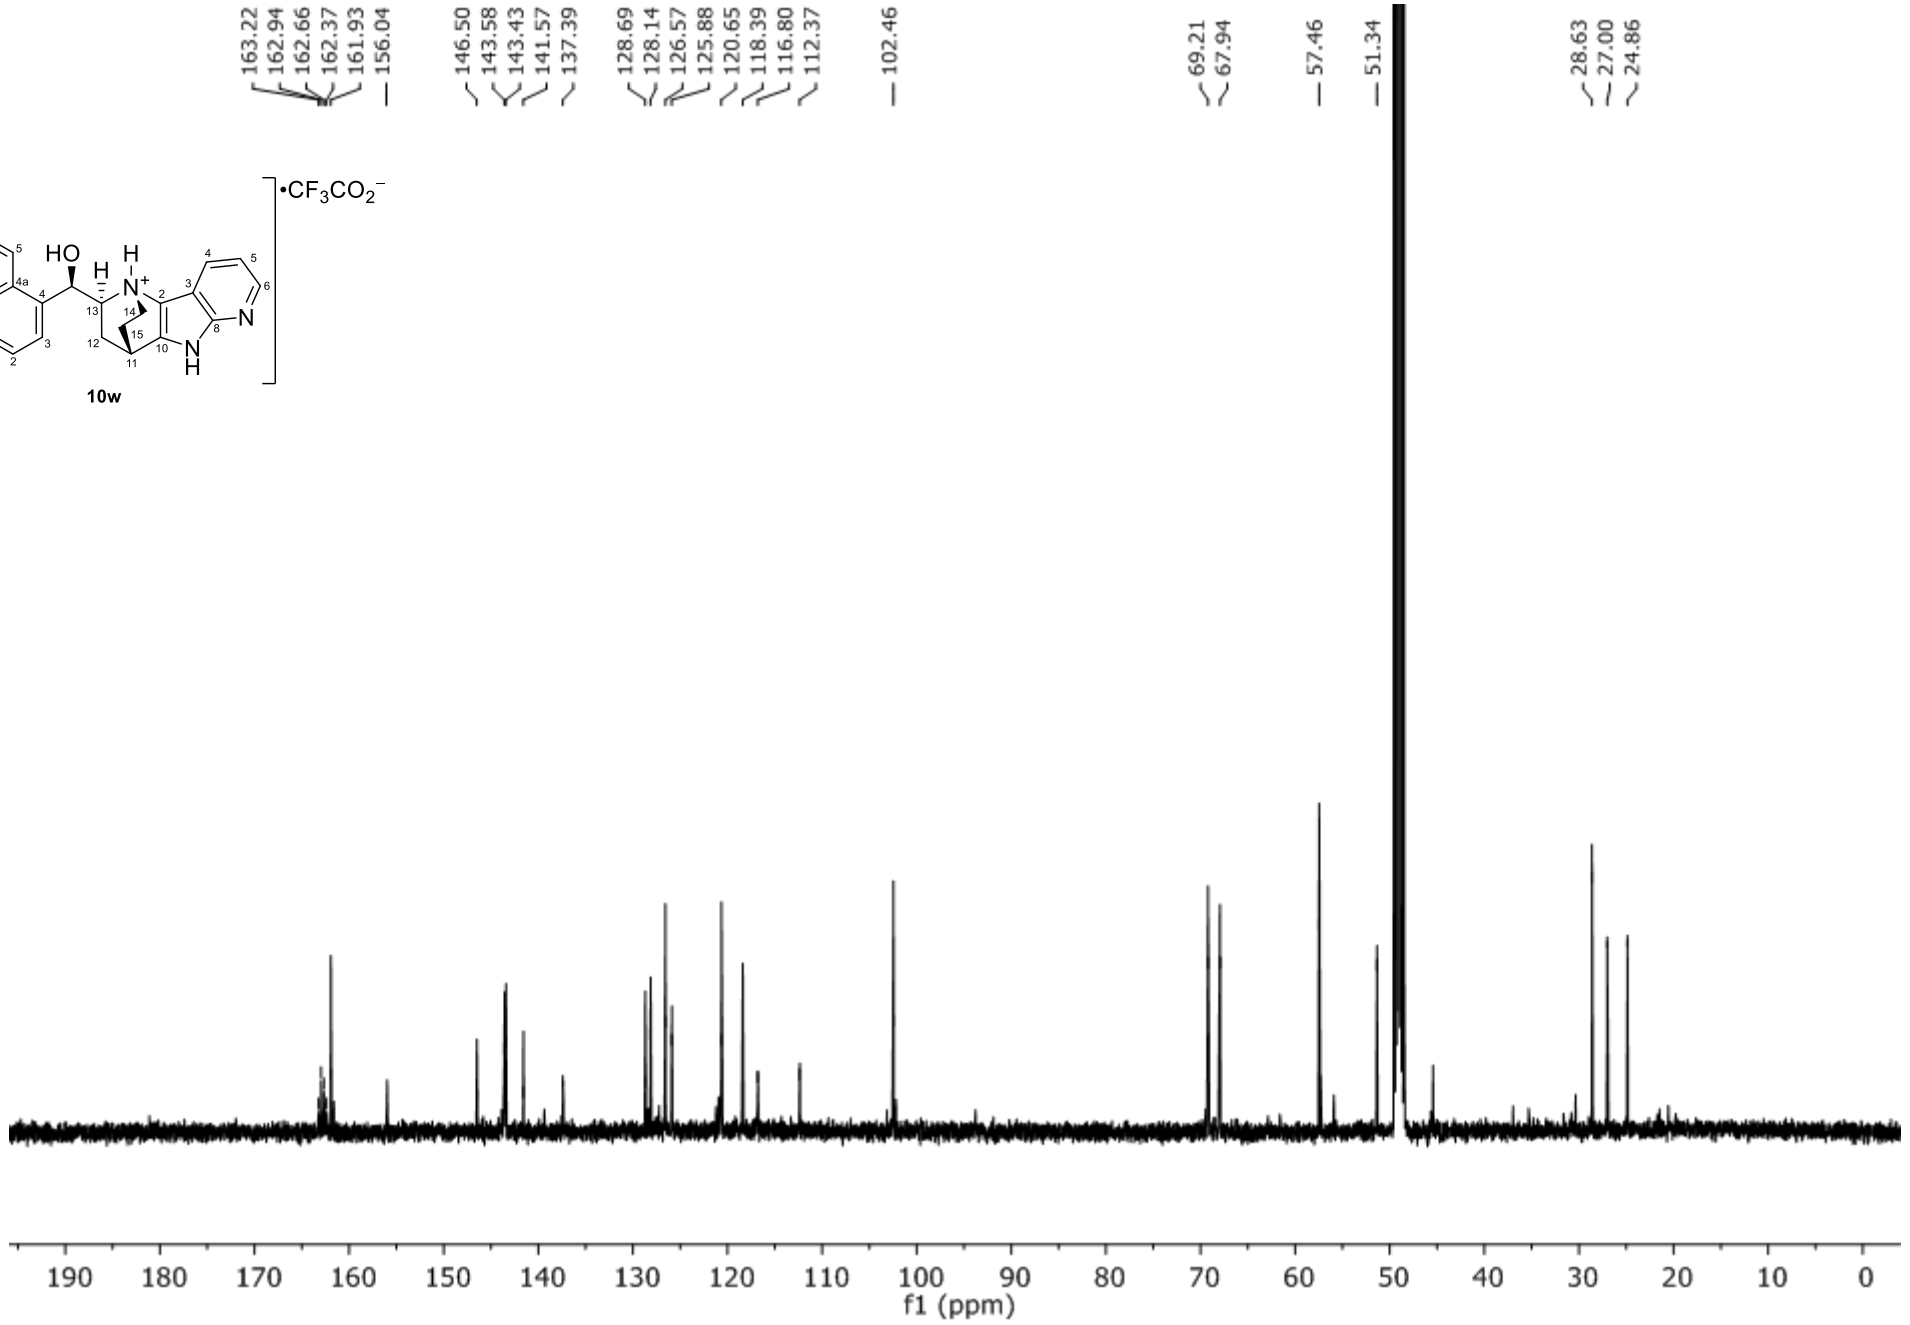

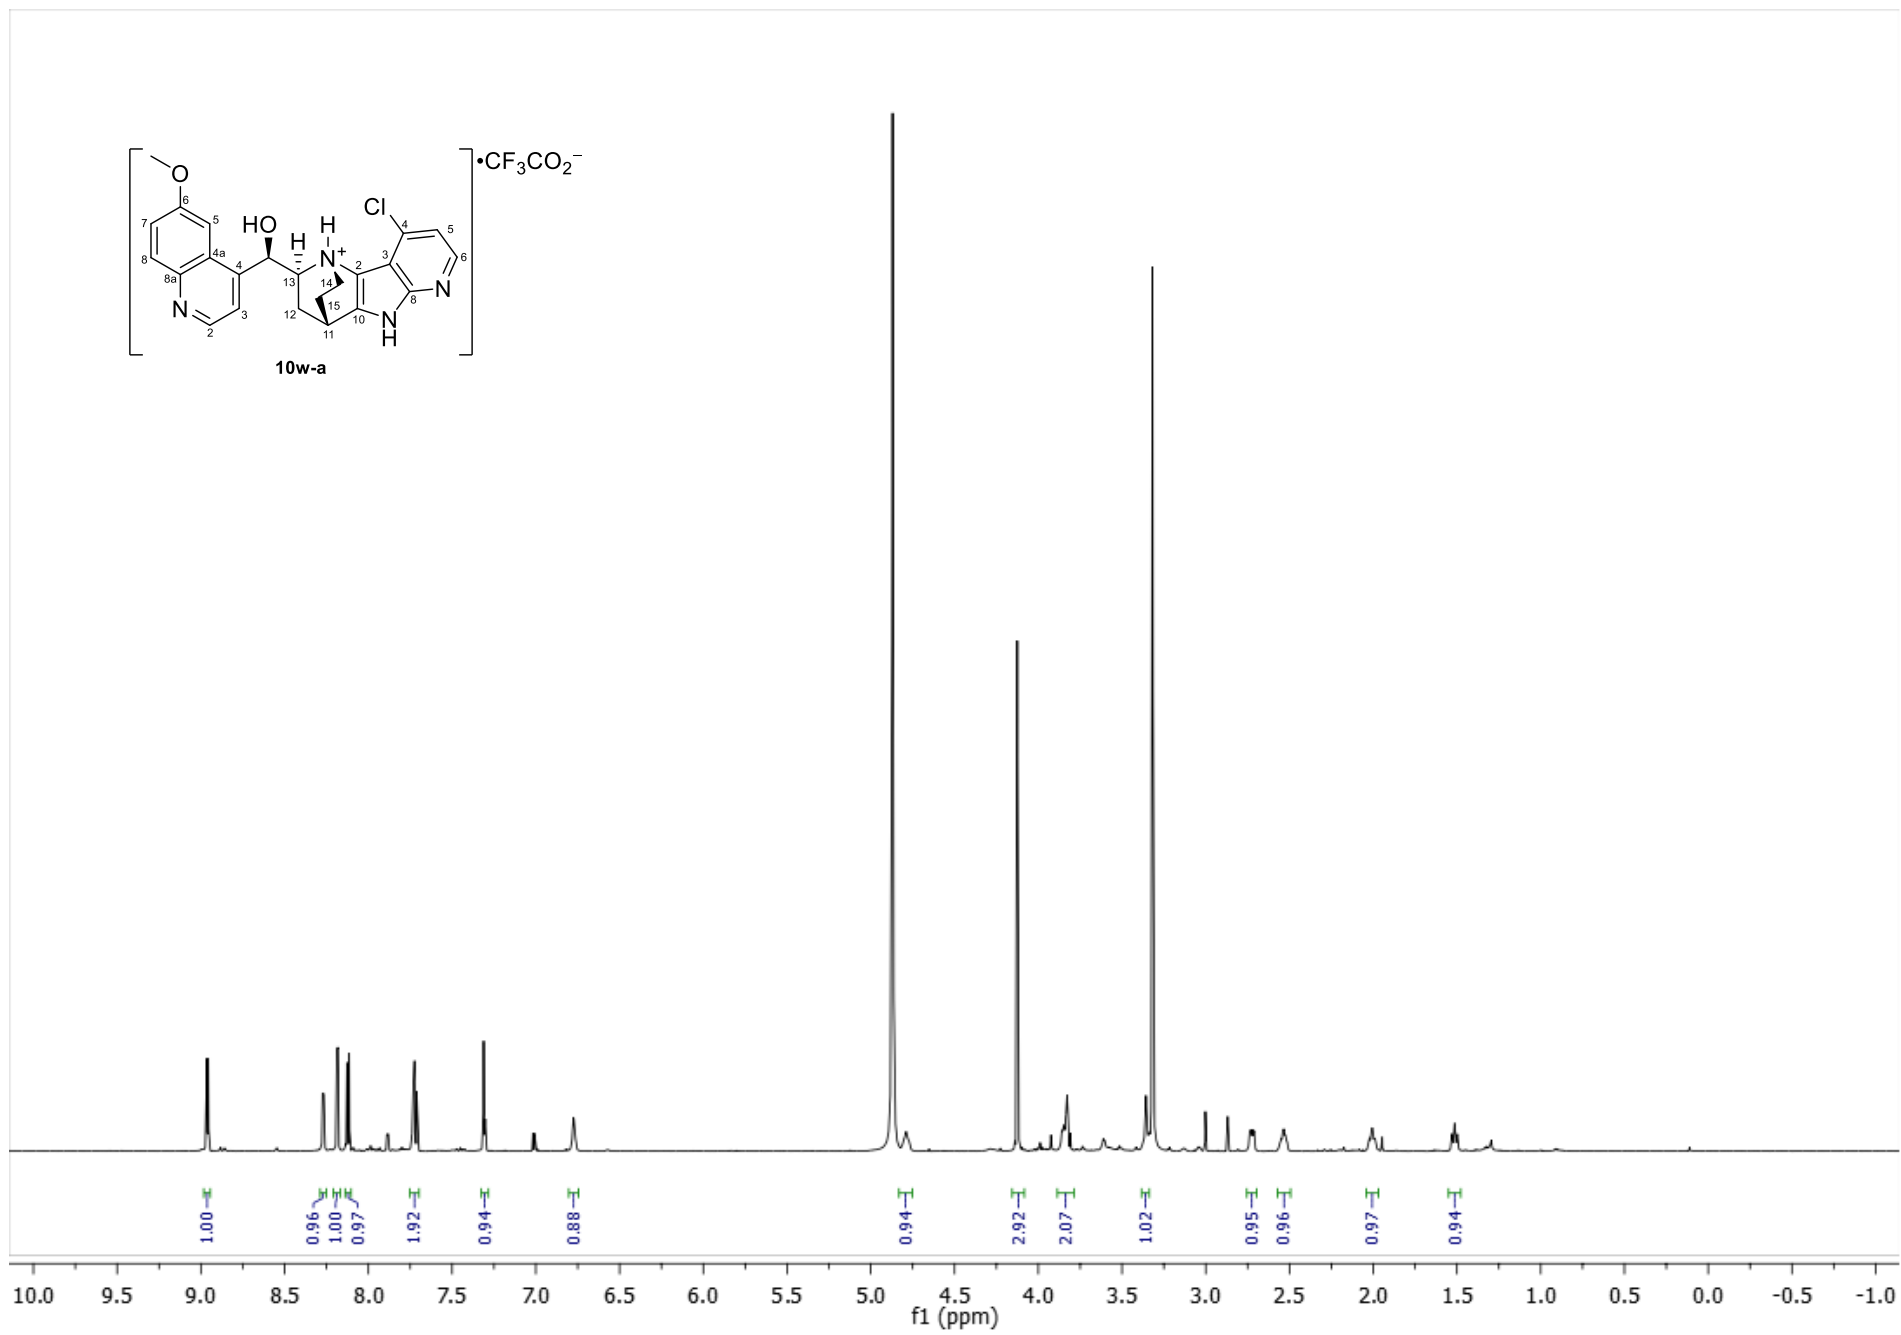

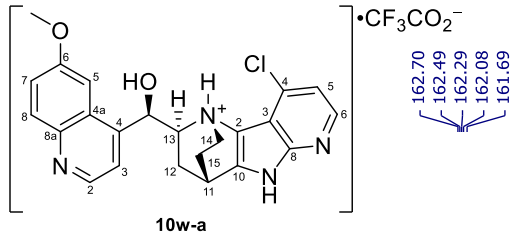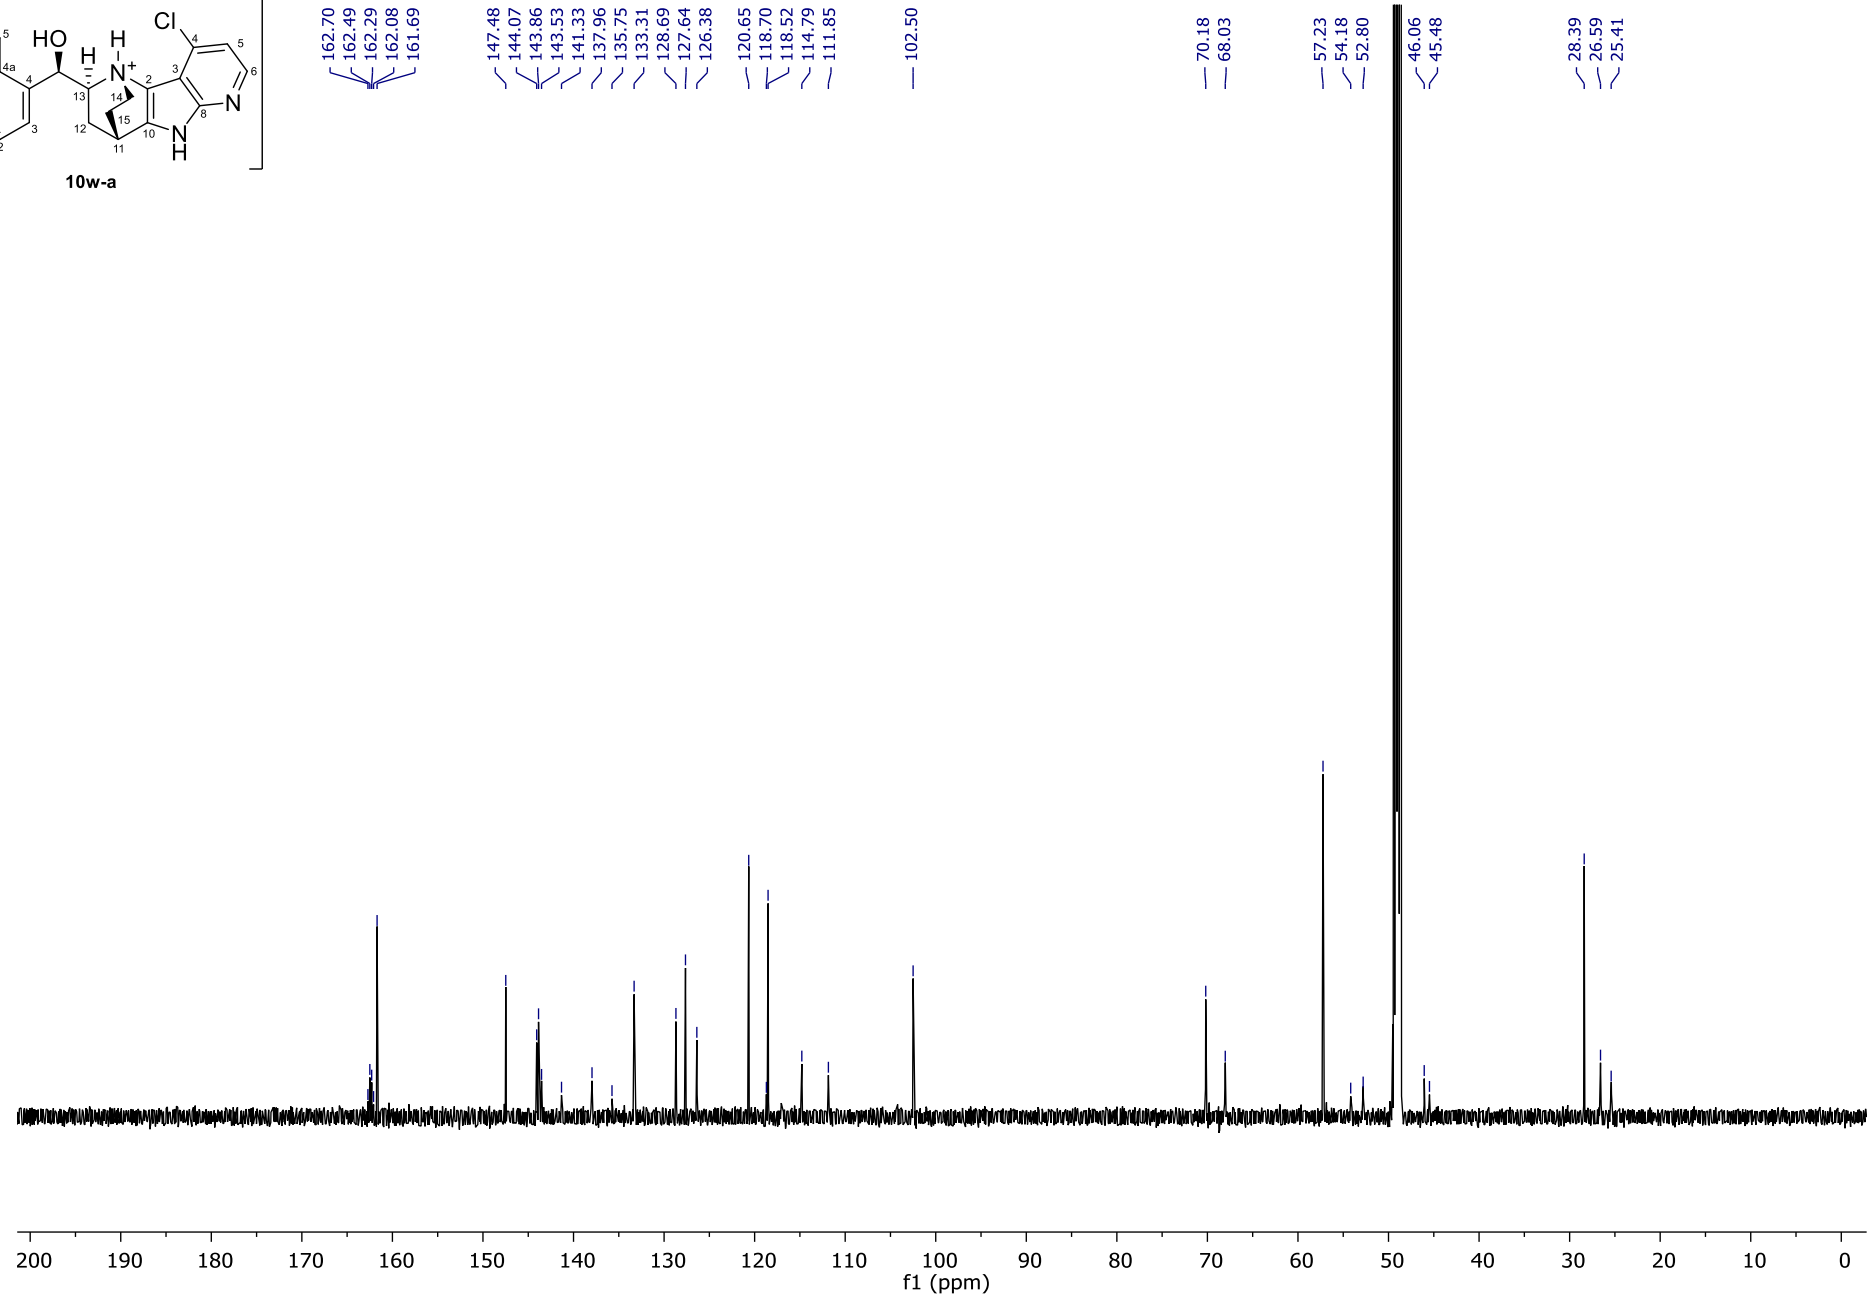

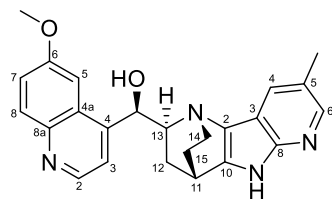**10w-b**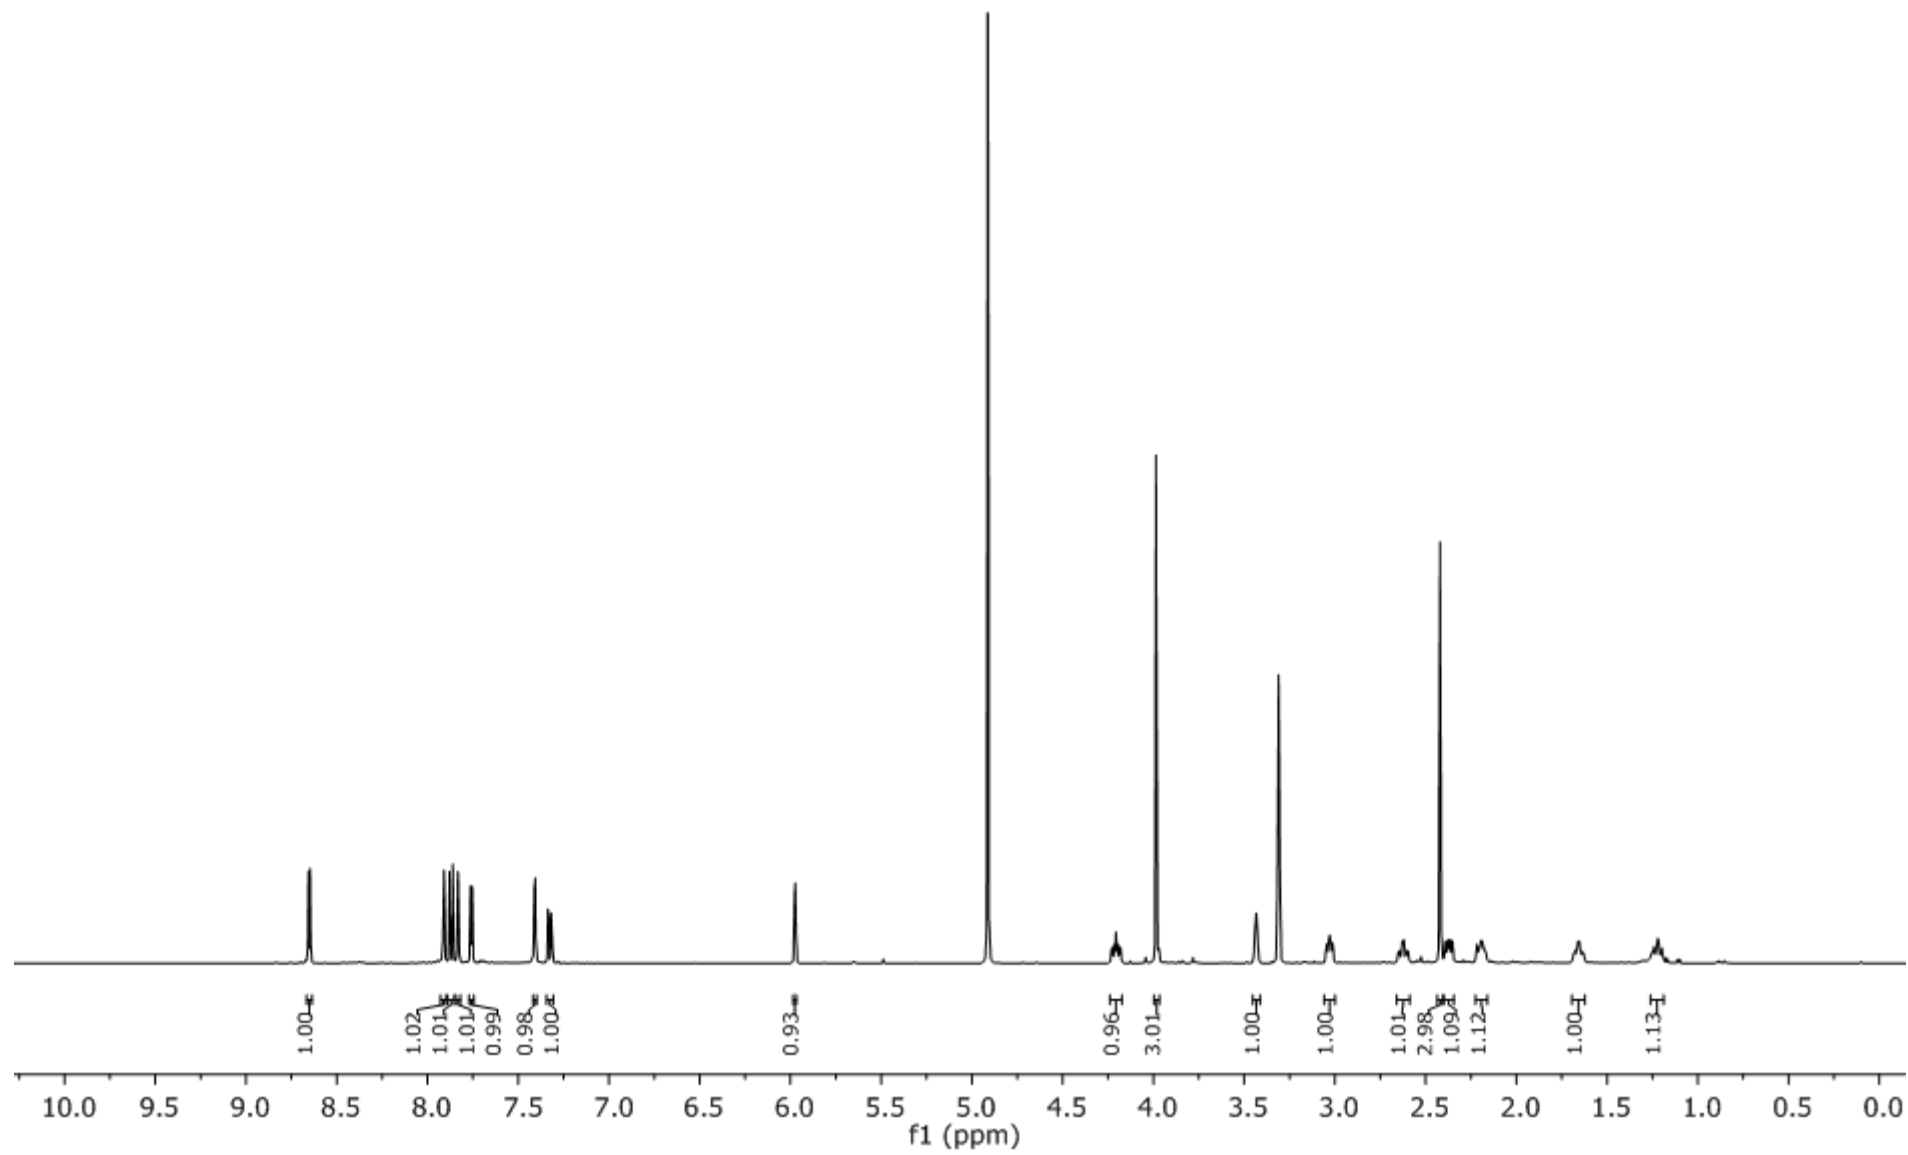

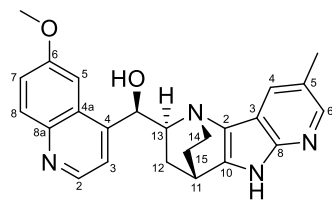

10w-b

— 159.66  
/ 151.06  
/ 148.20  
/ 145.67  
/ 144.68  
/ 144.61  
/ 141.90  
/ 131.31  
/ 127.84  
/ 126.26  
/ 126.07  
/ 125.52  
/ 123.59  
/ 119.43  
/ 115.65

— 101.95

— 71.70

— 66.88

— 56.49

— 46.98

/ 30.46  
/ 29.33

/ 27.86

— 18.56

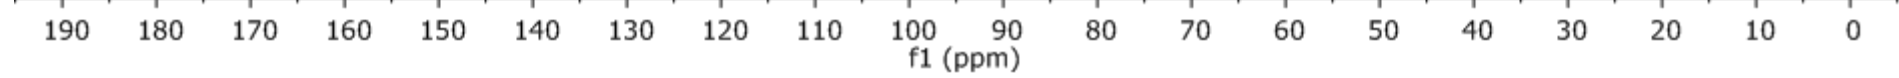



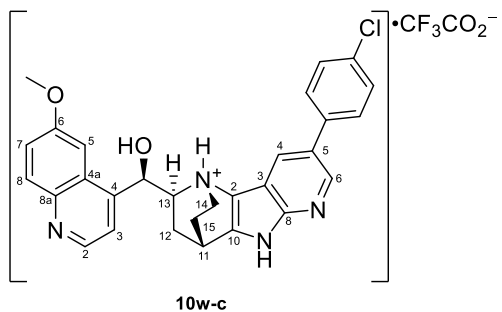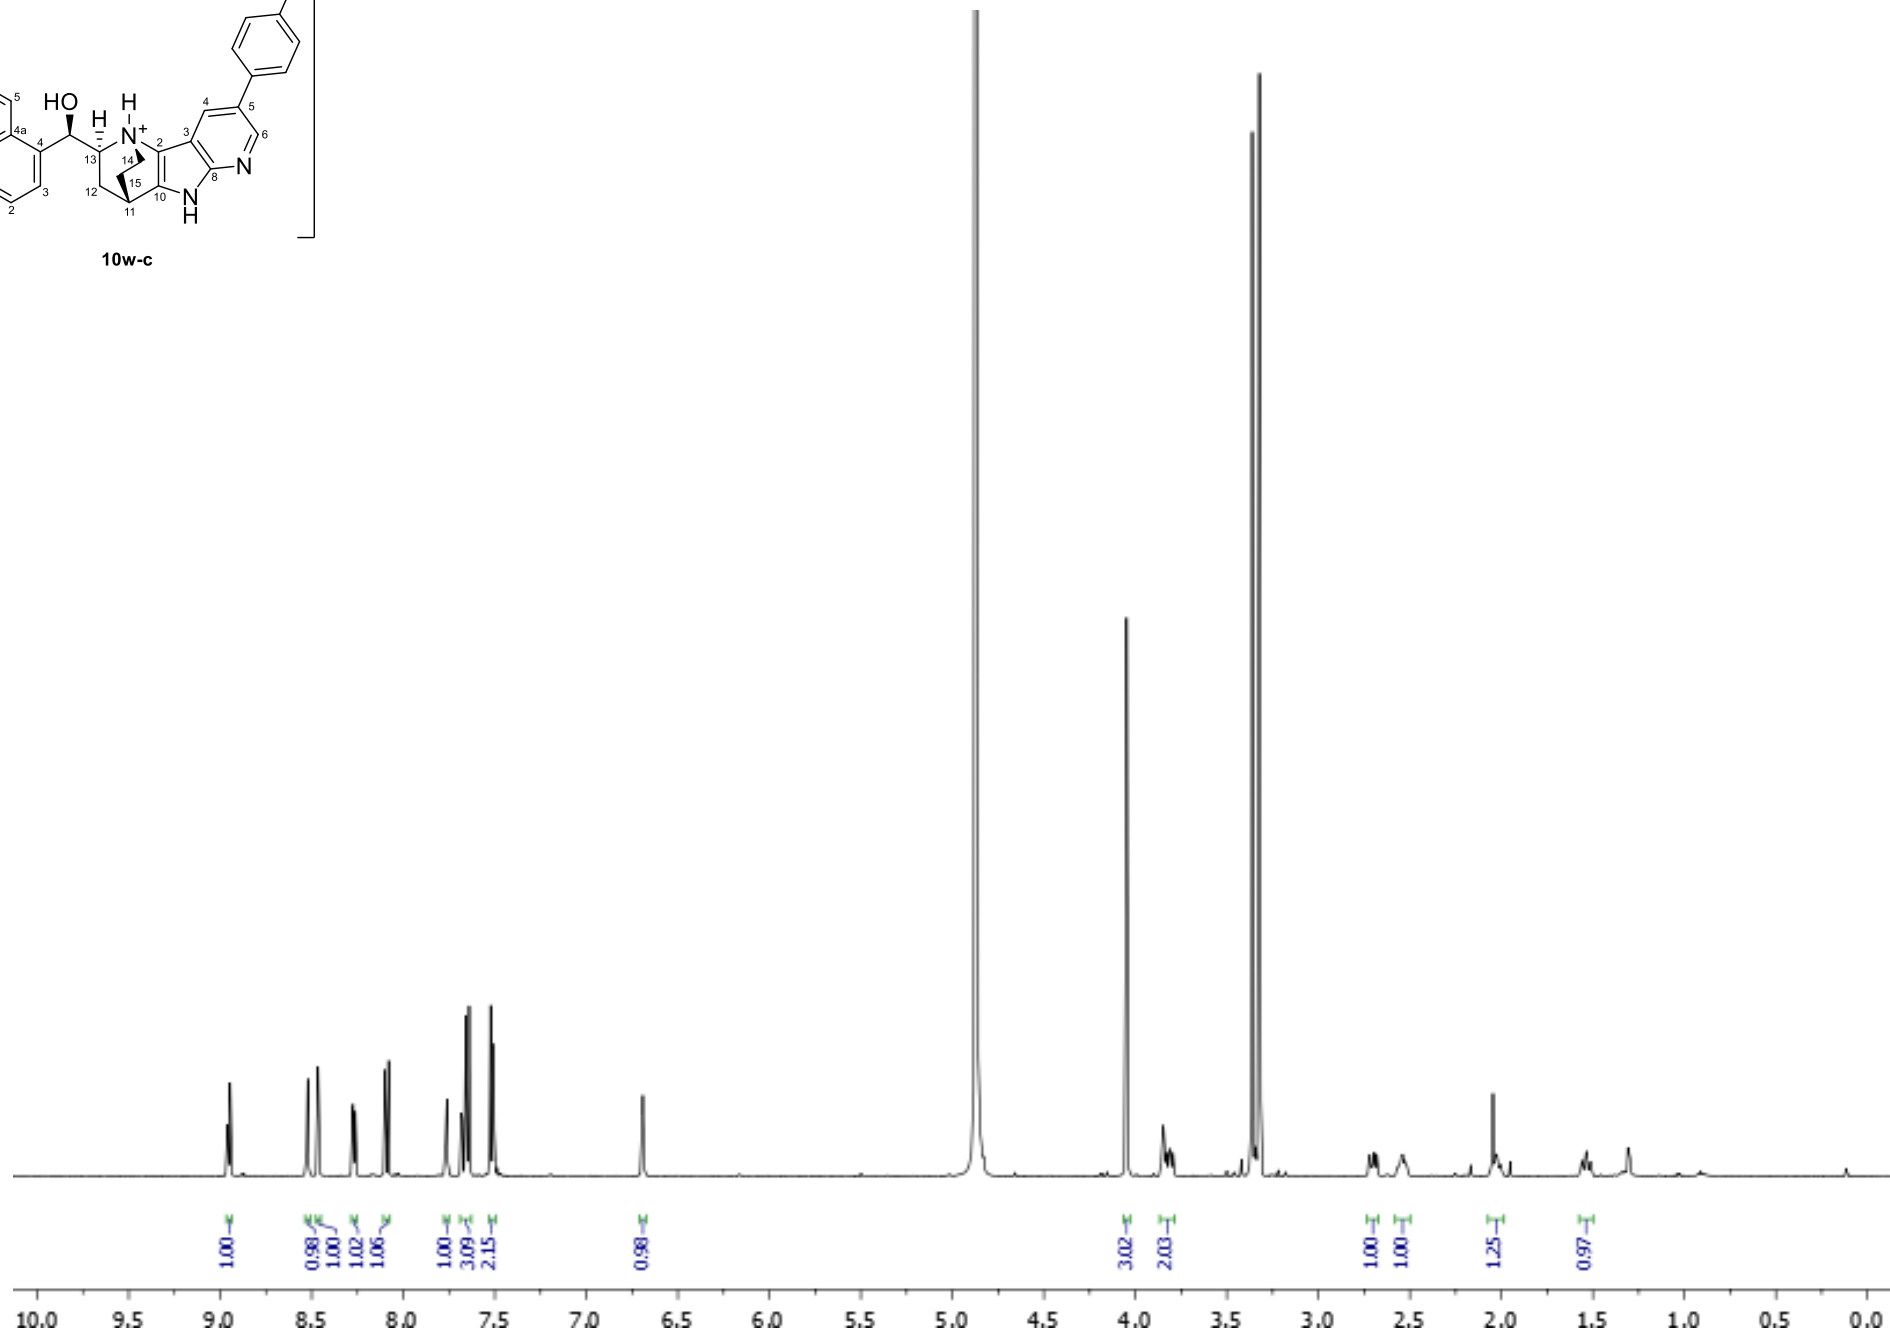

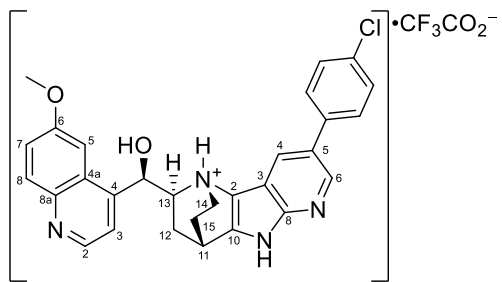**10w-c**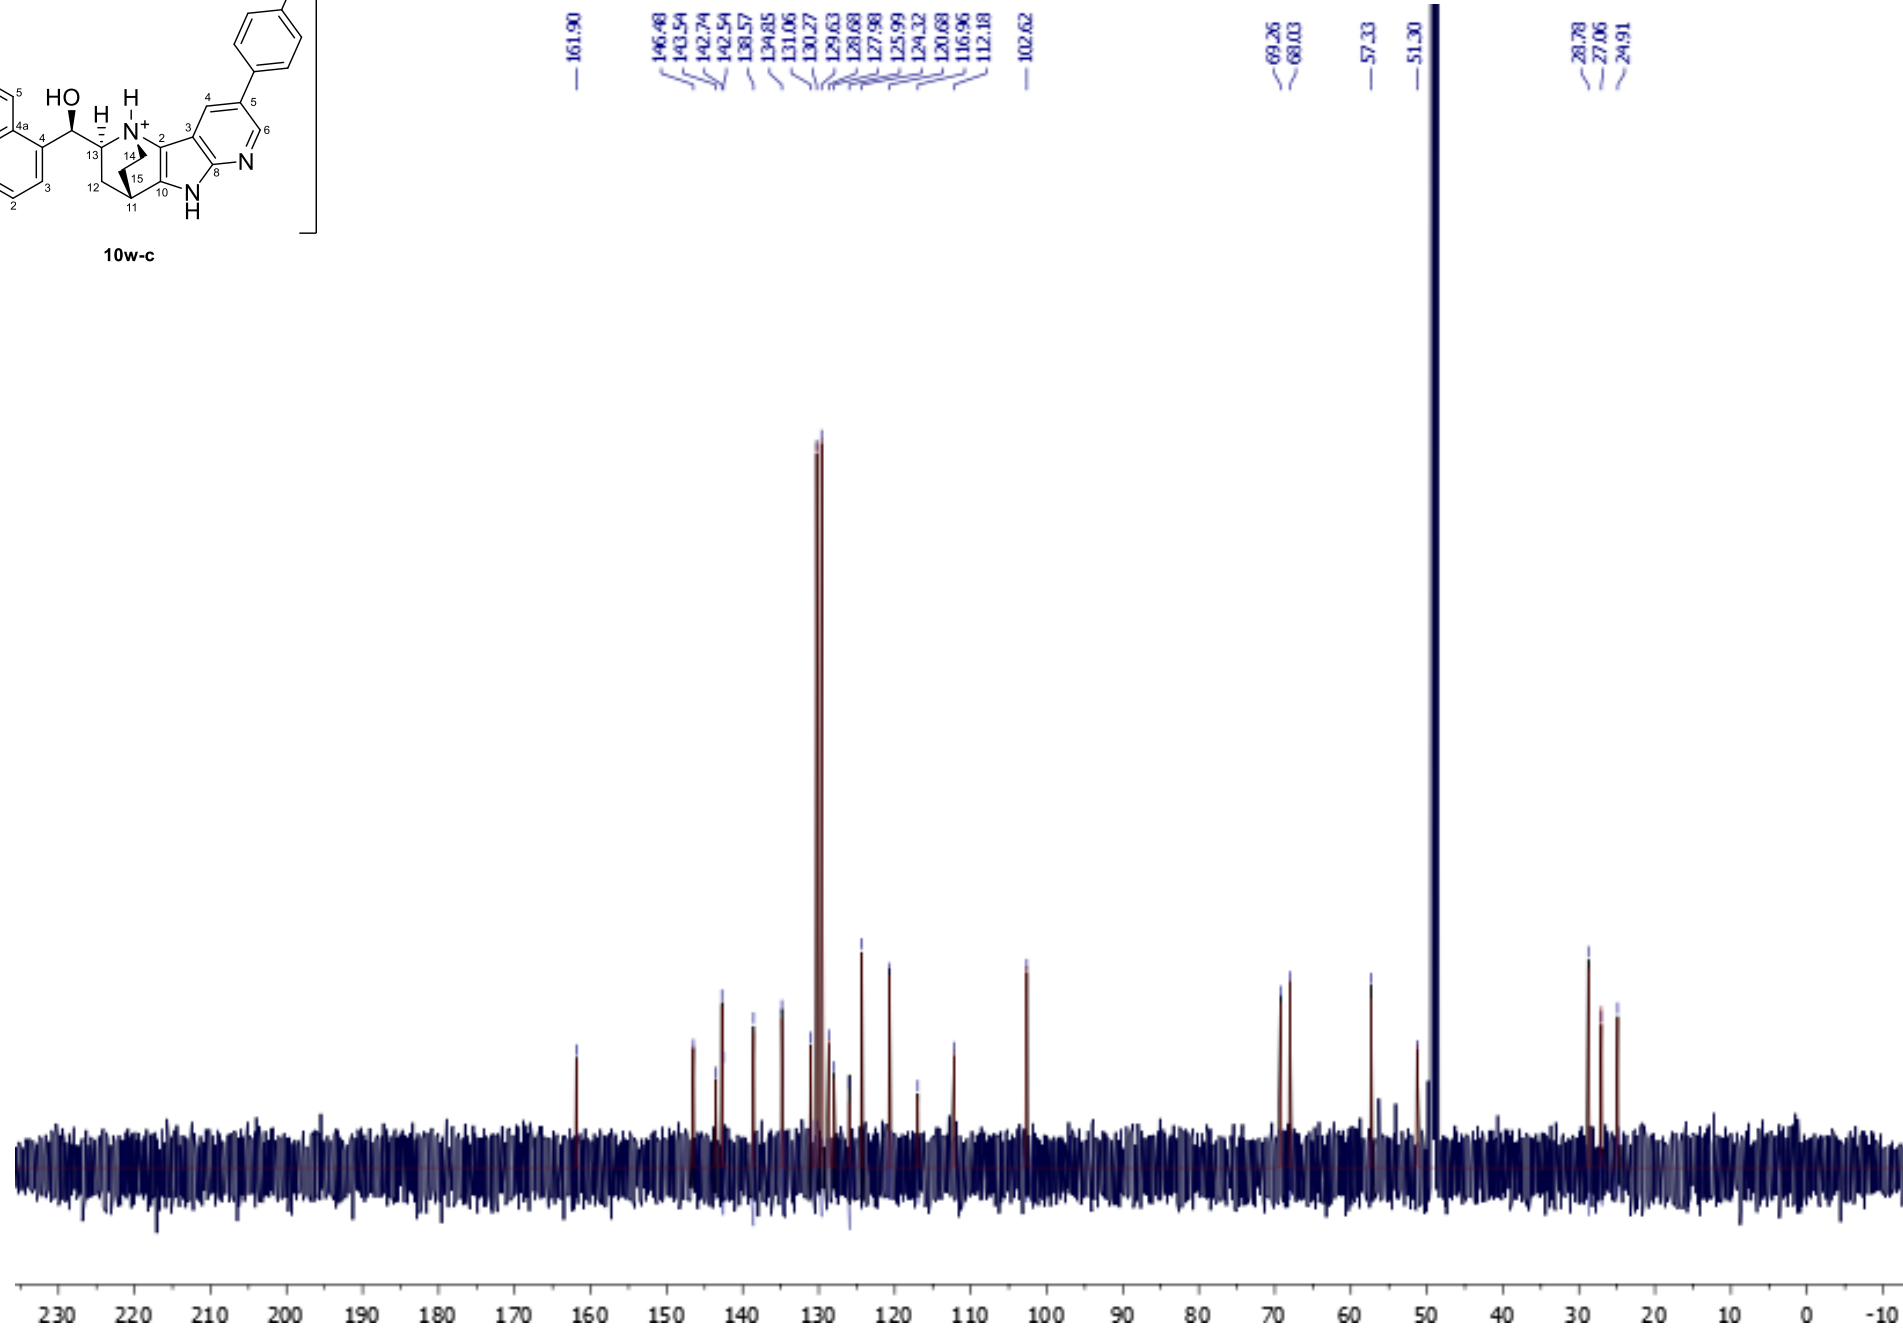

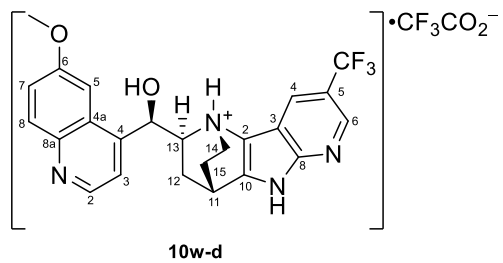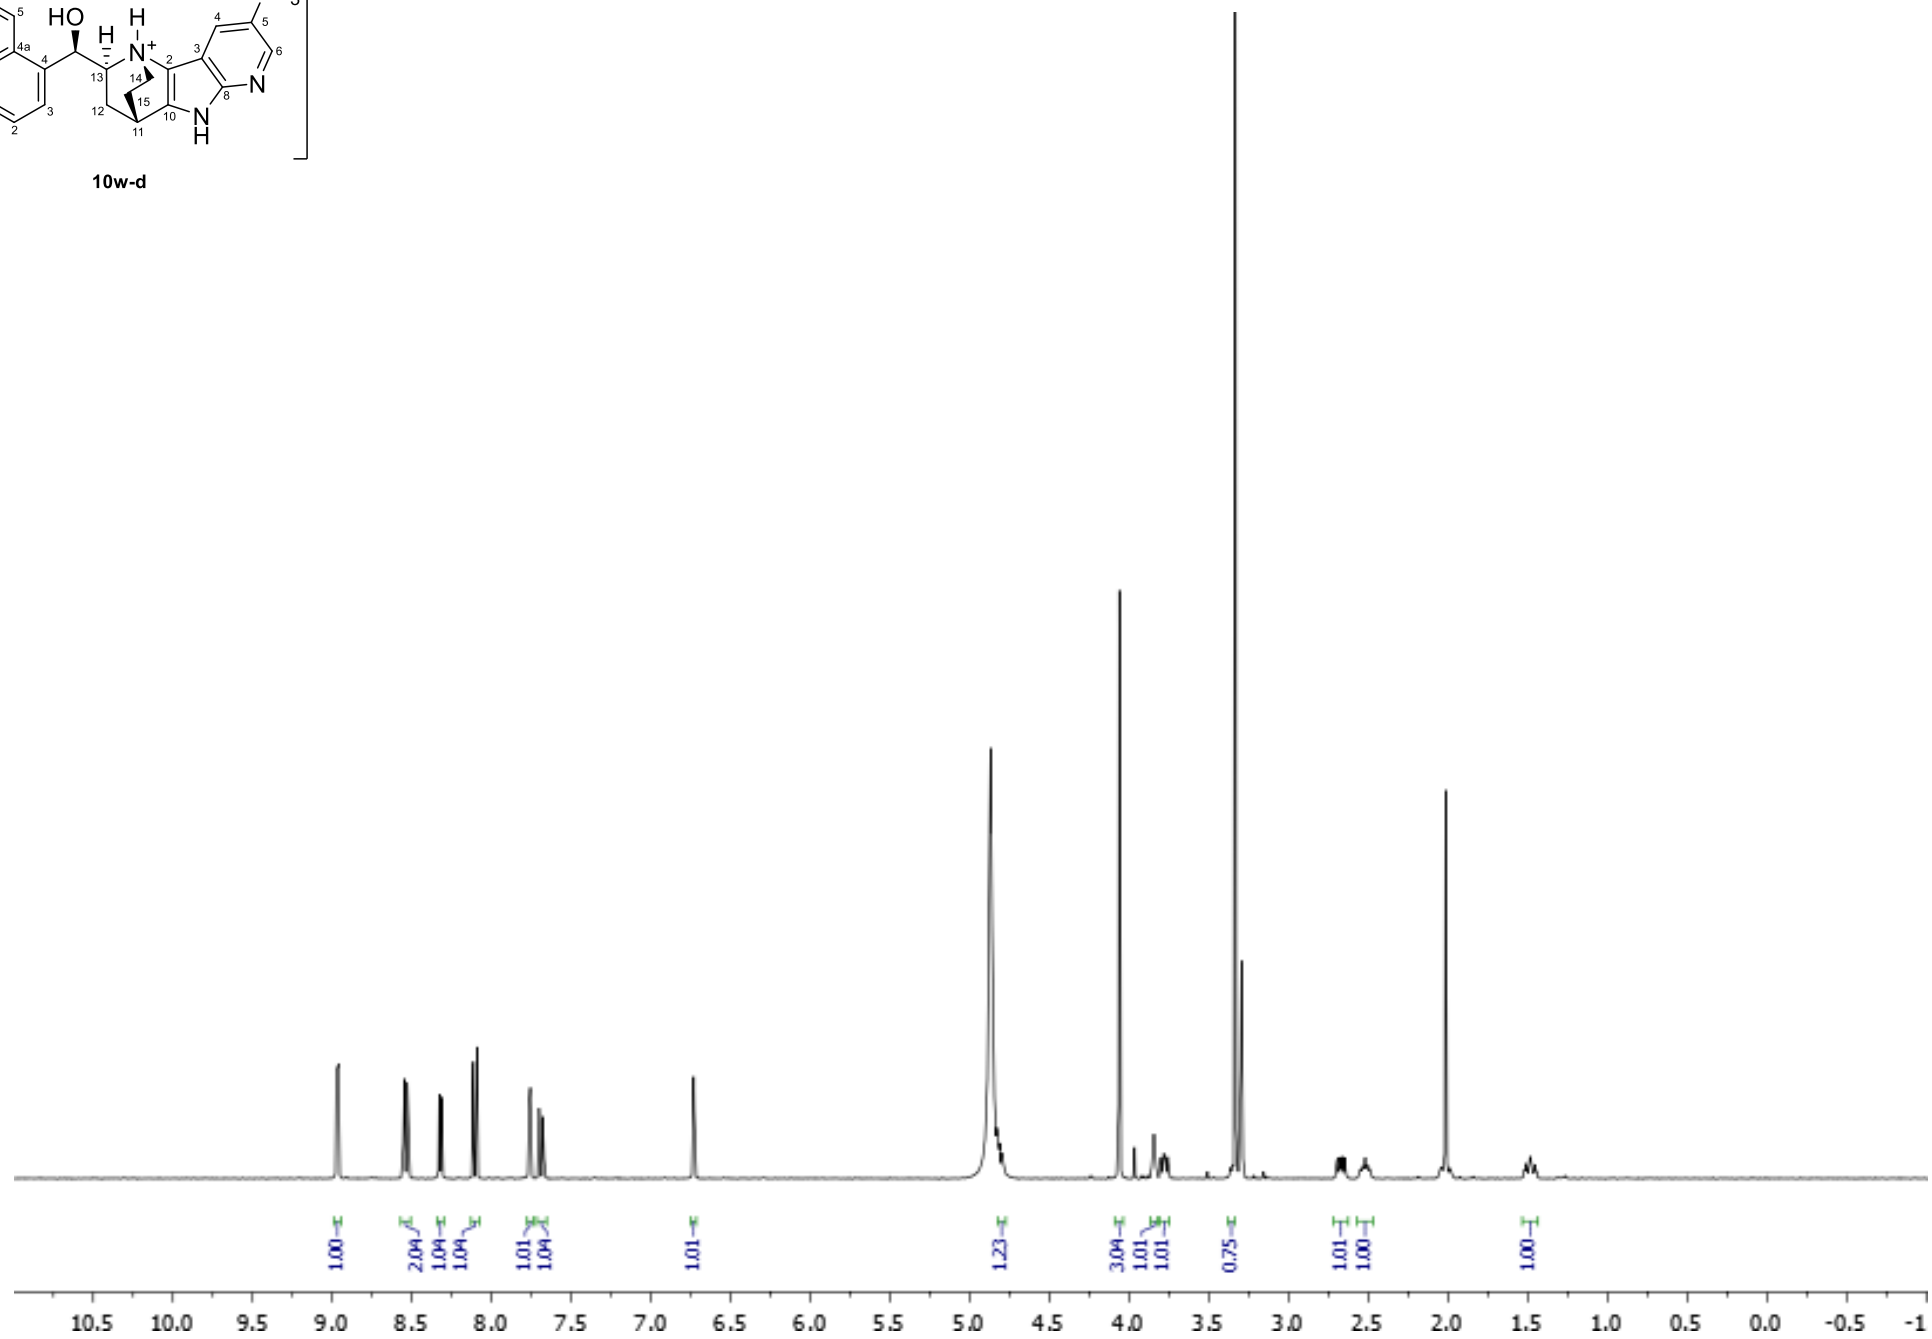

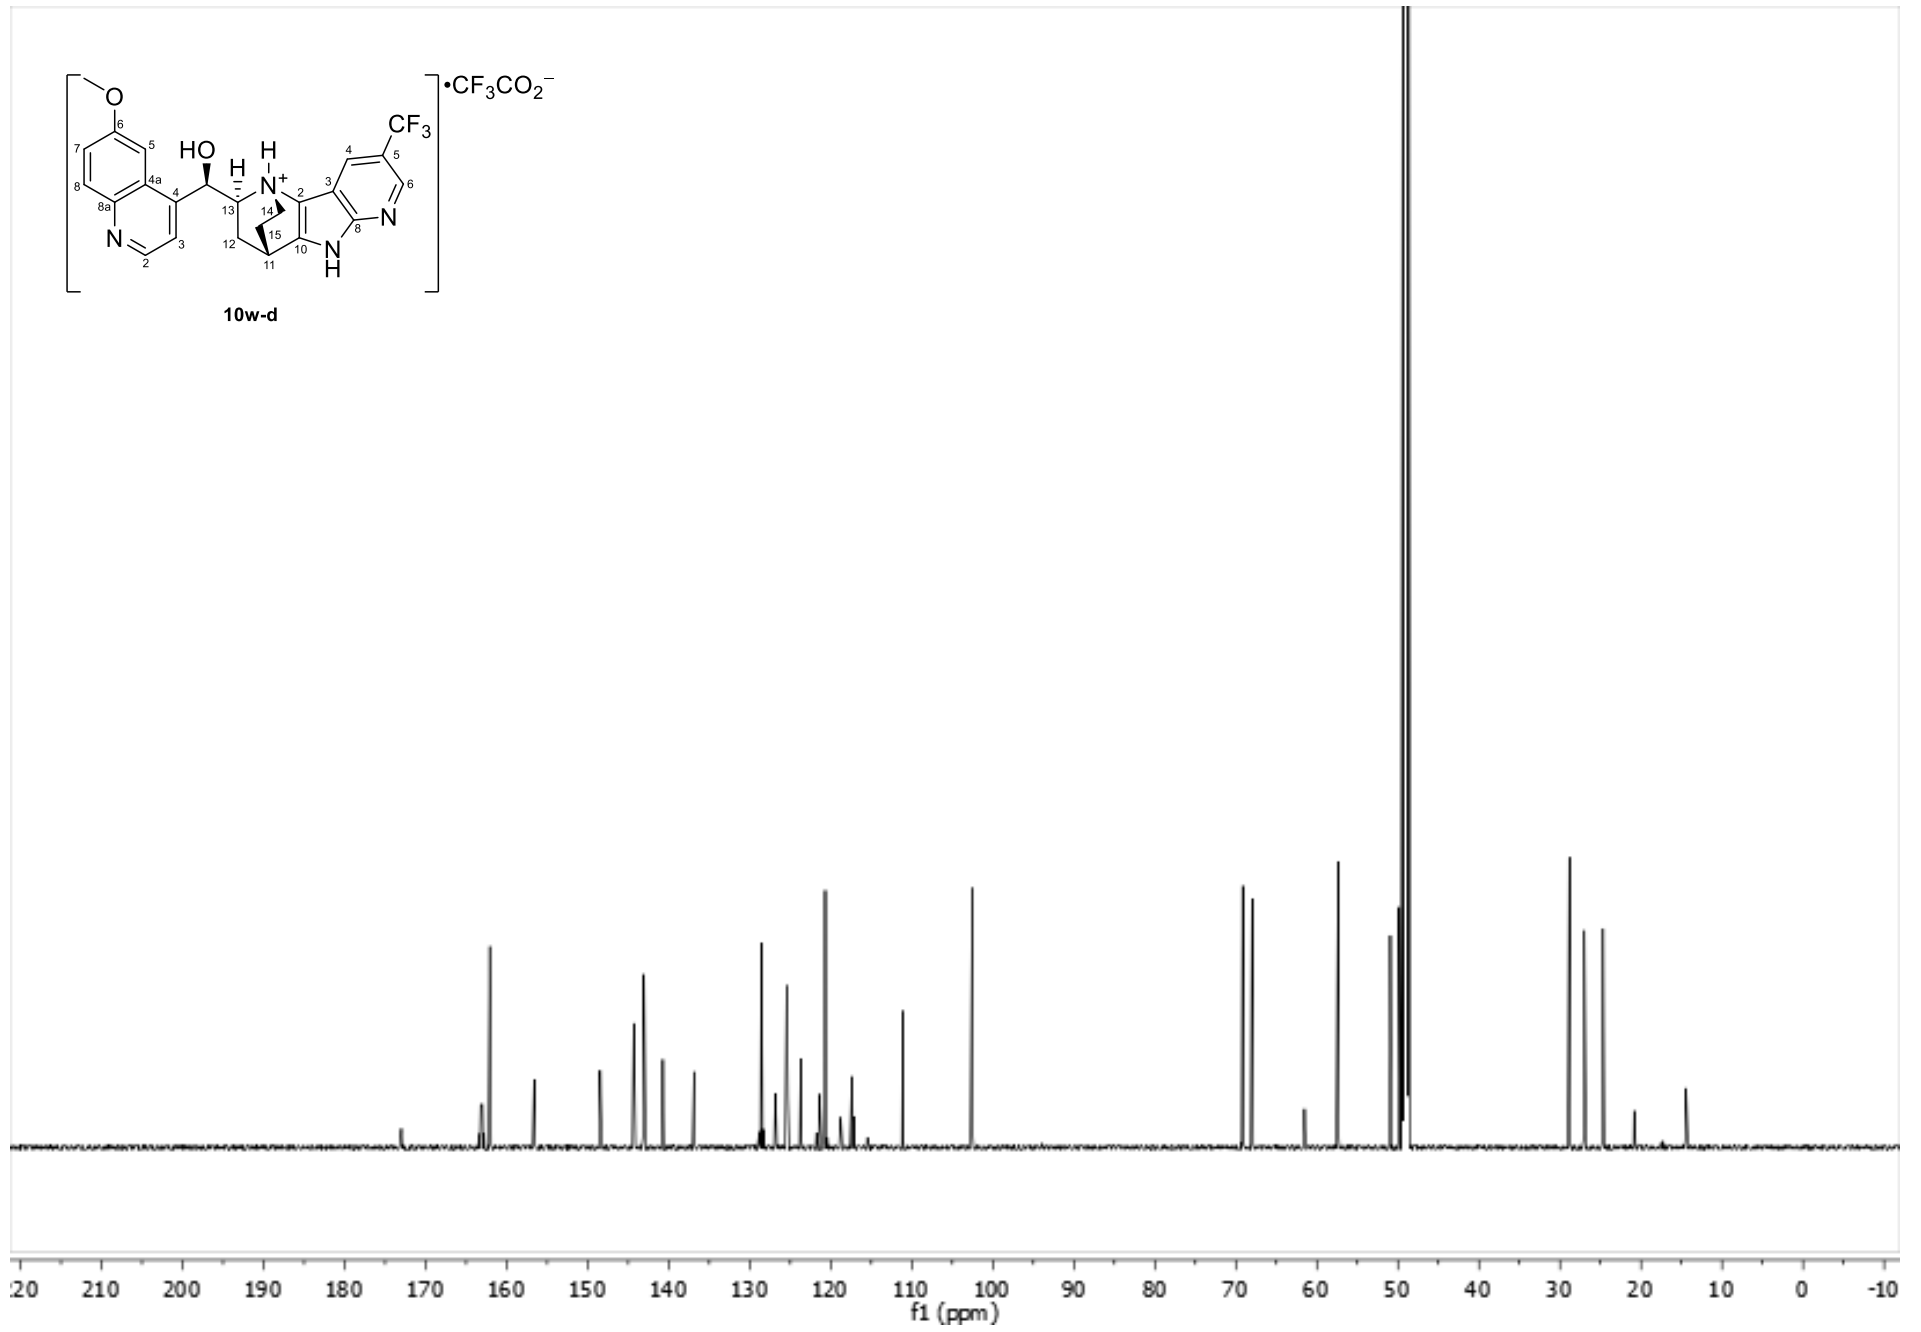

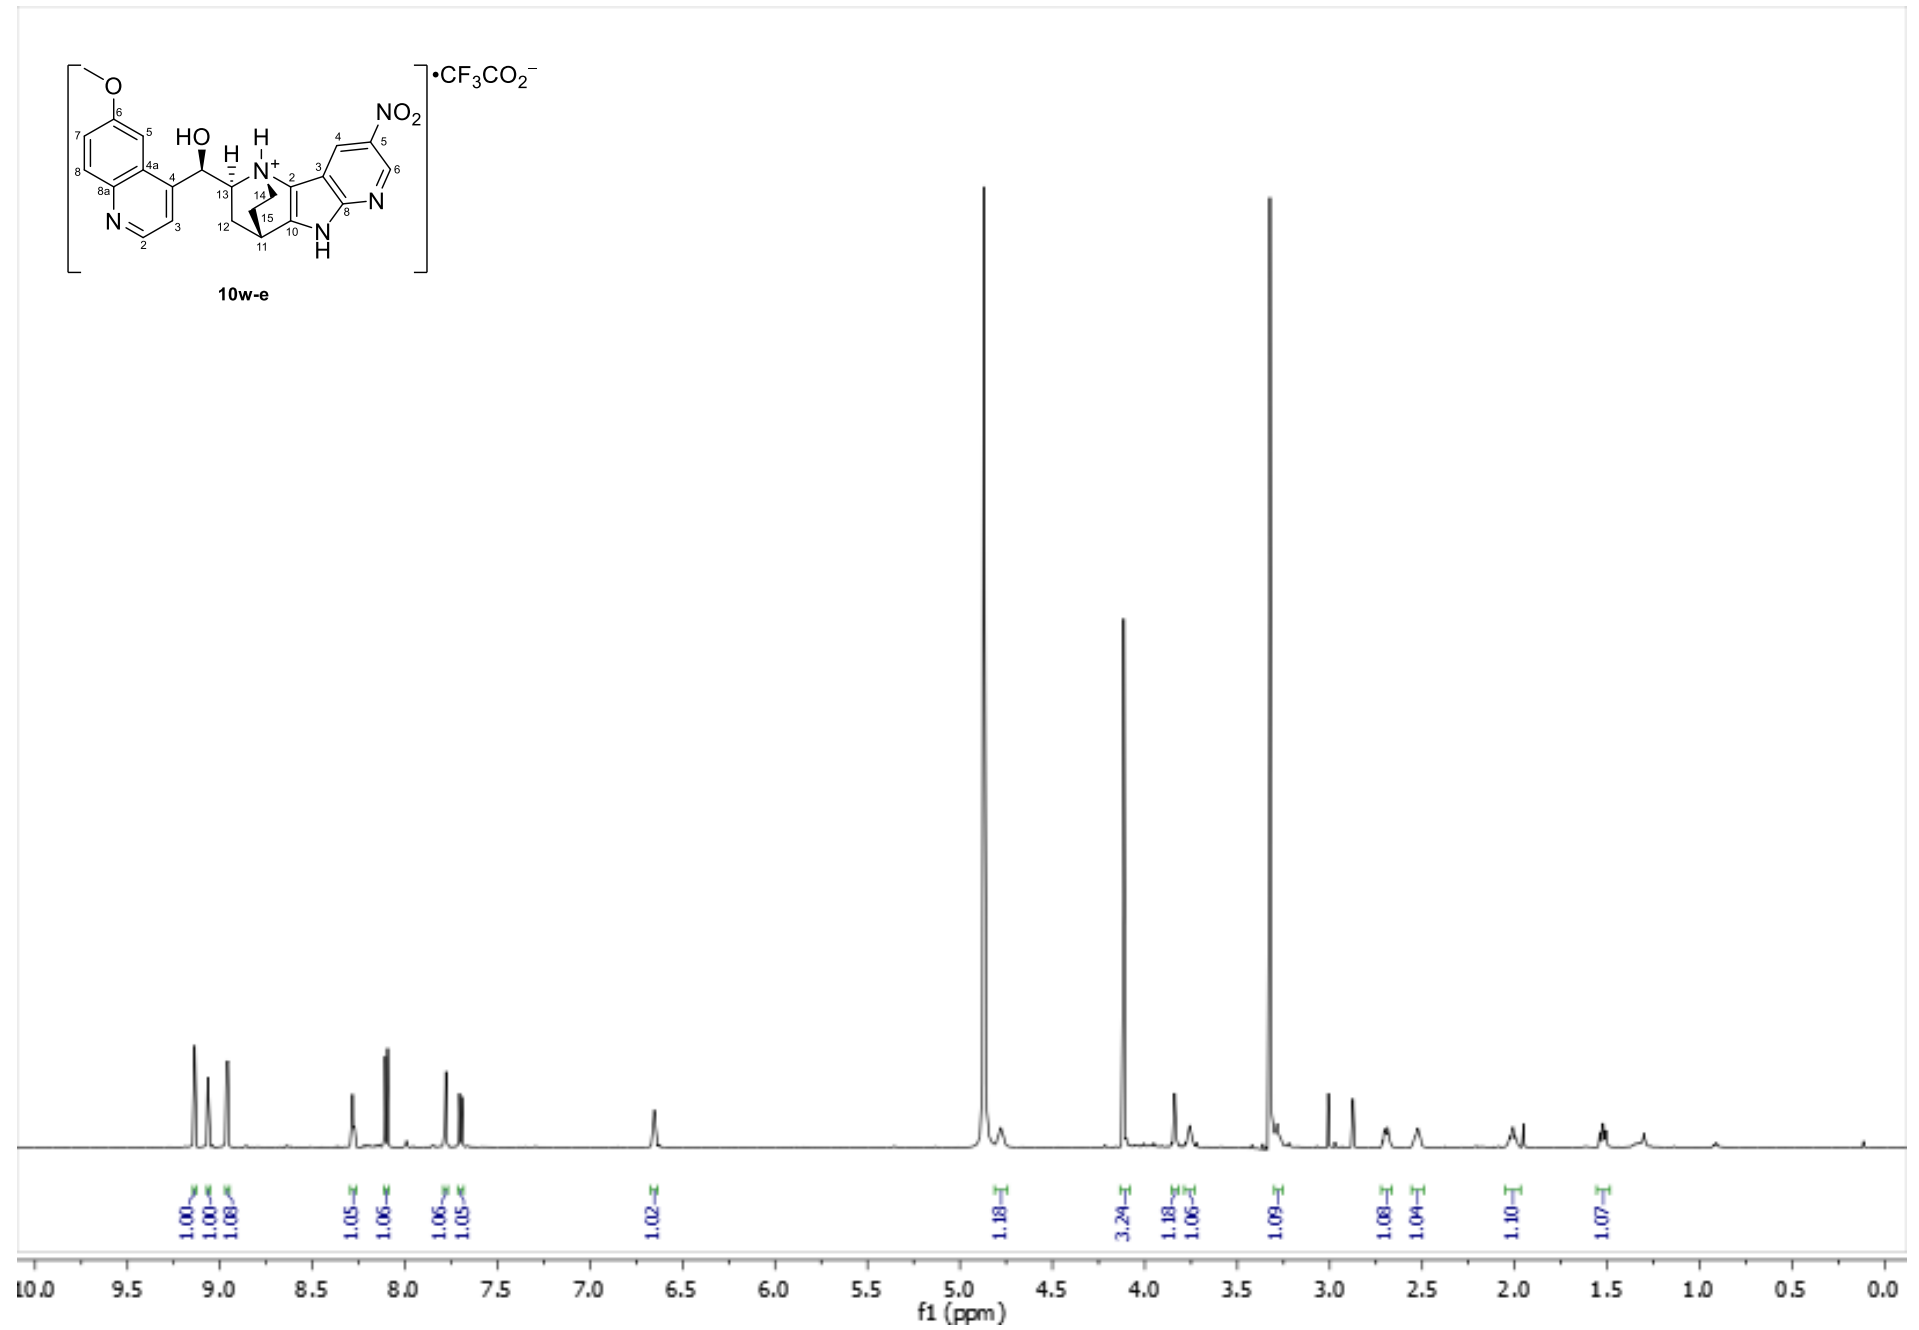

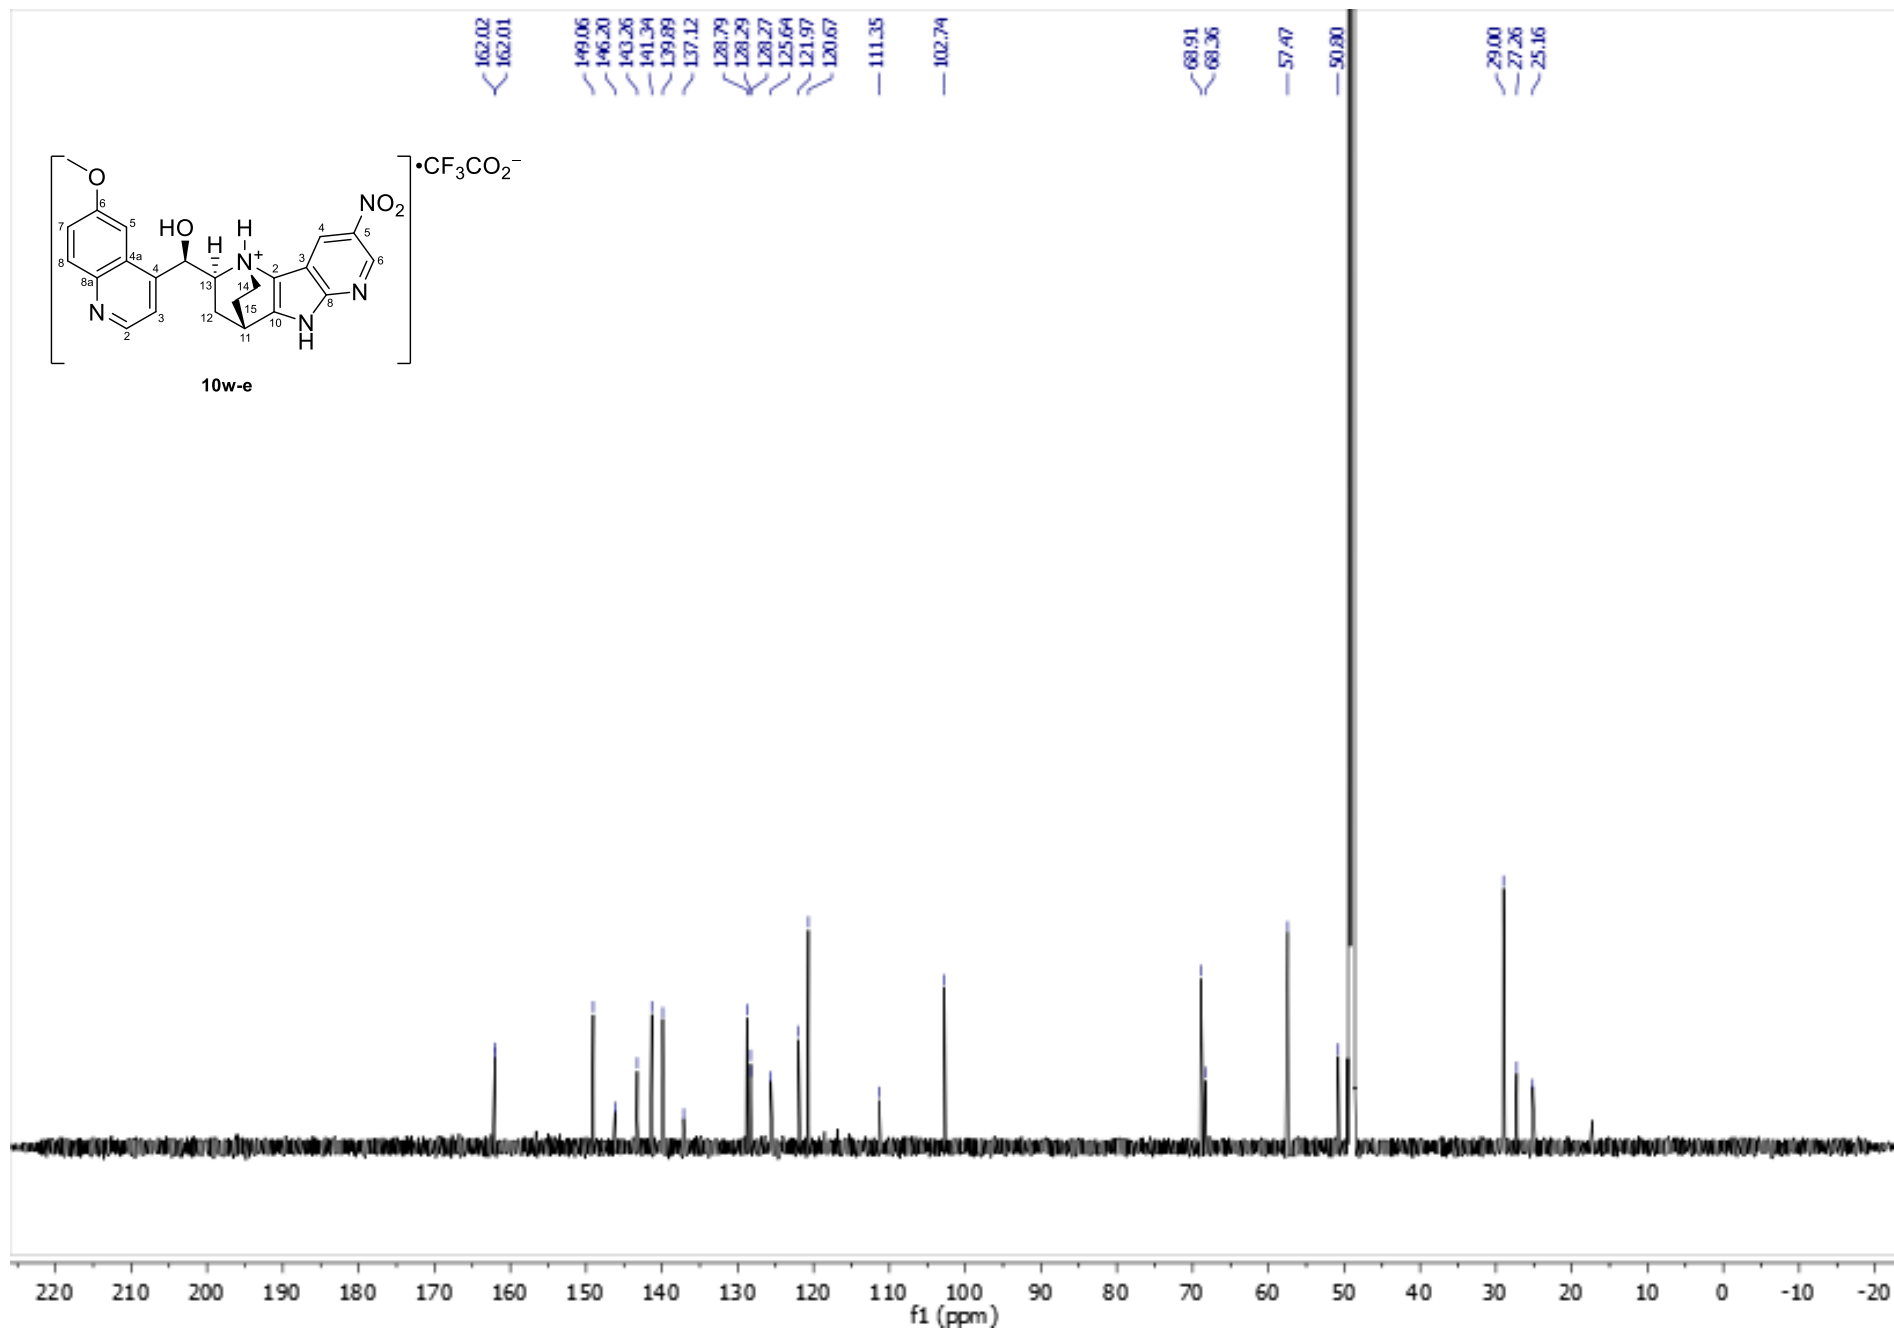

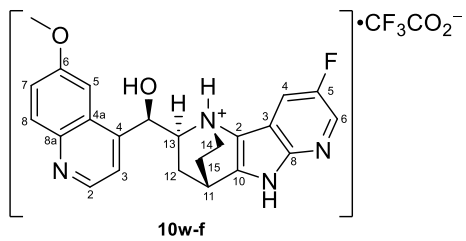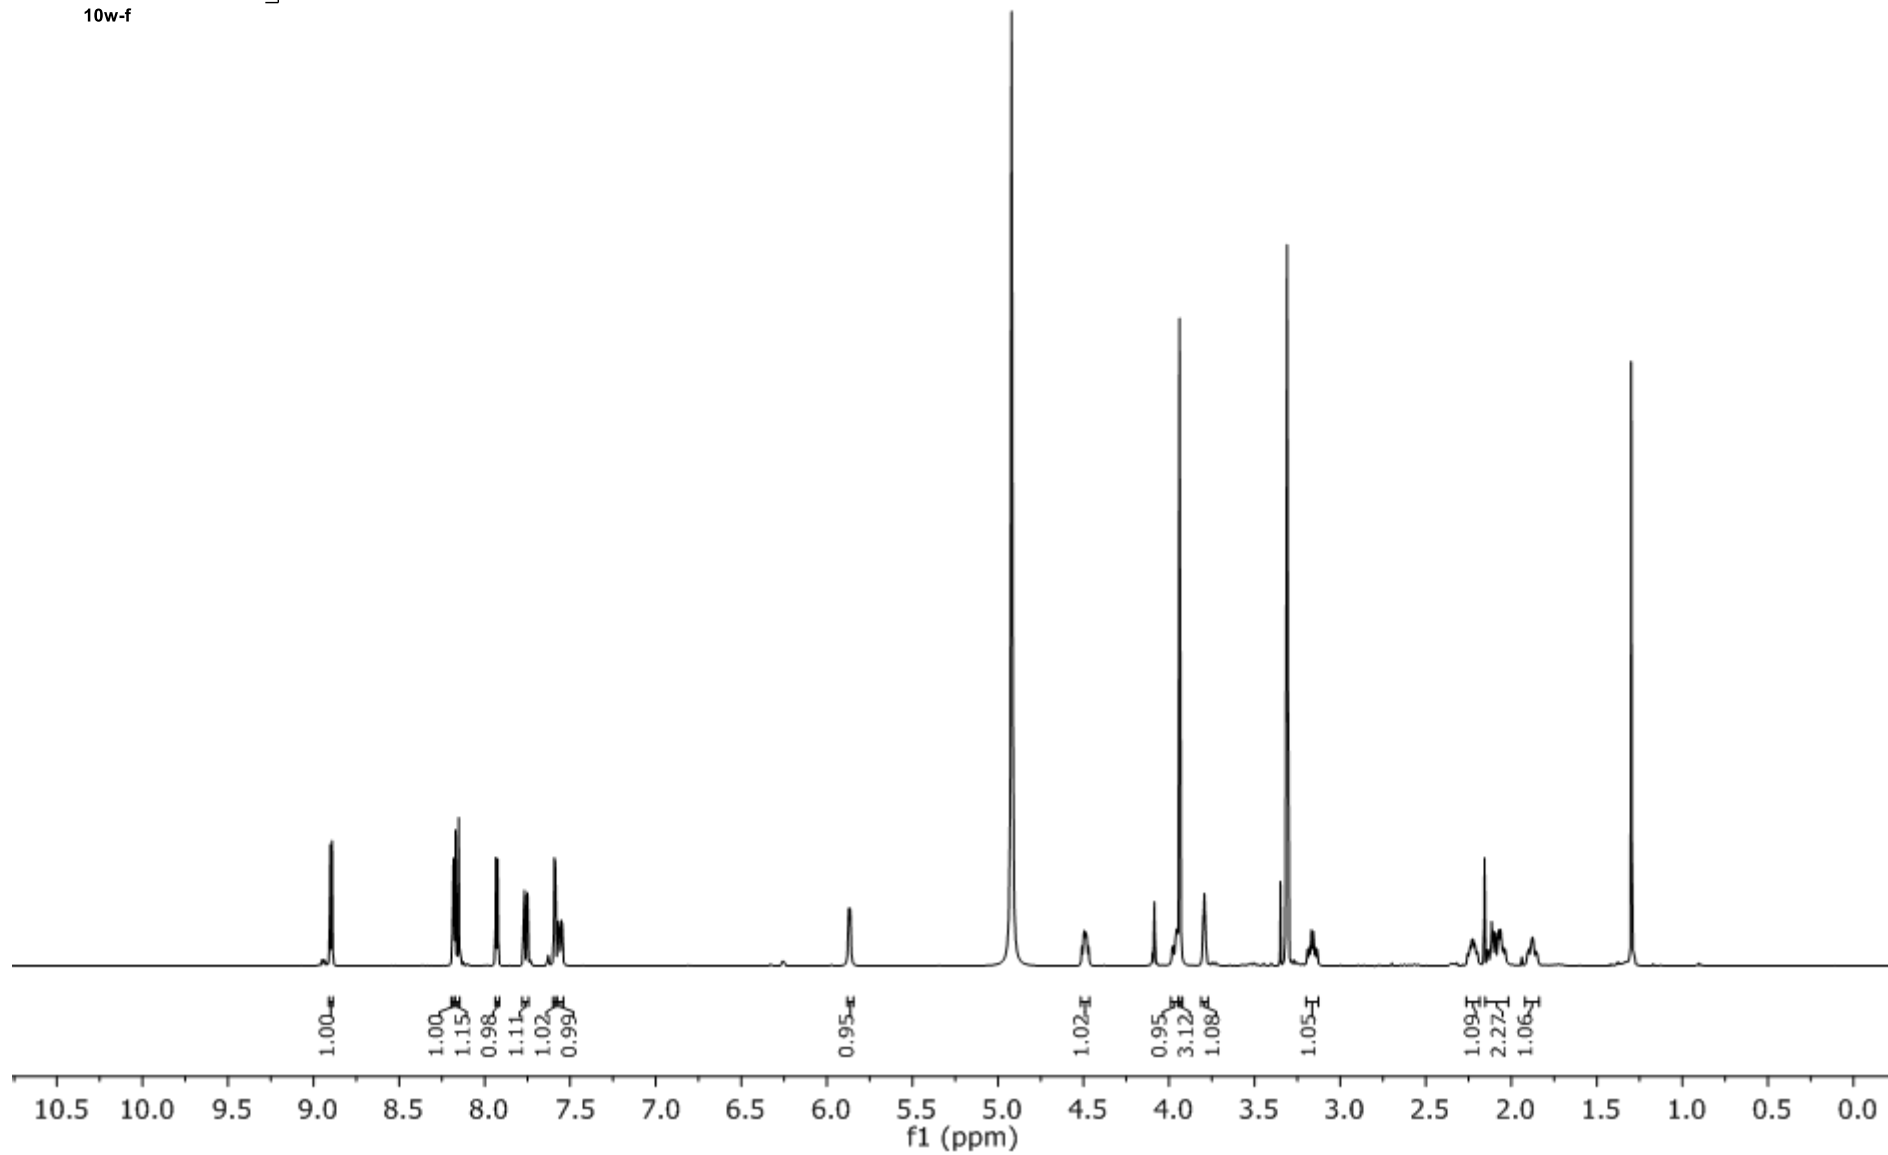

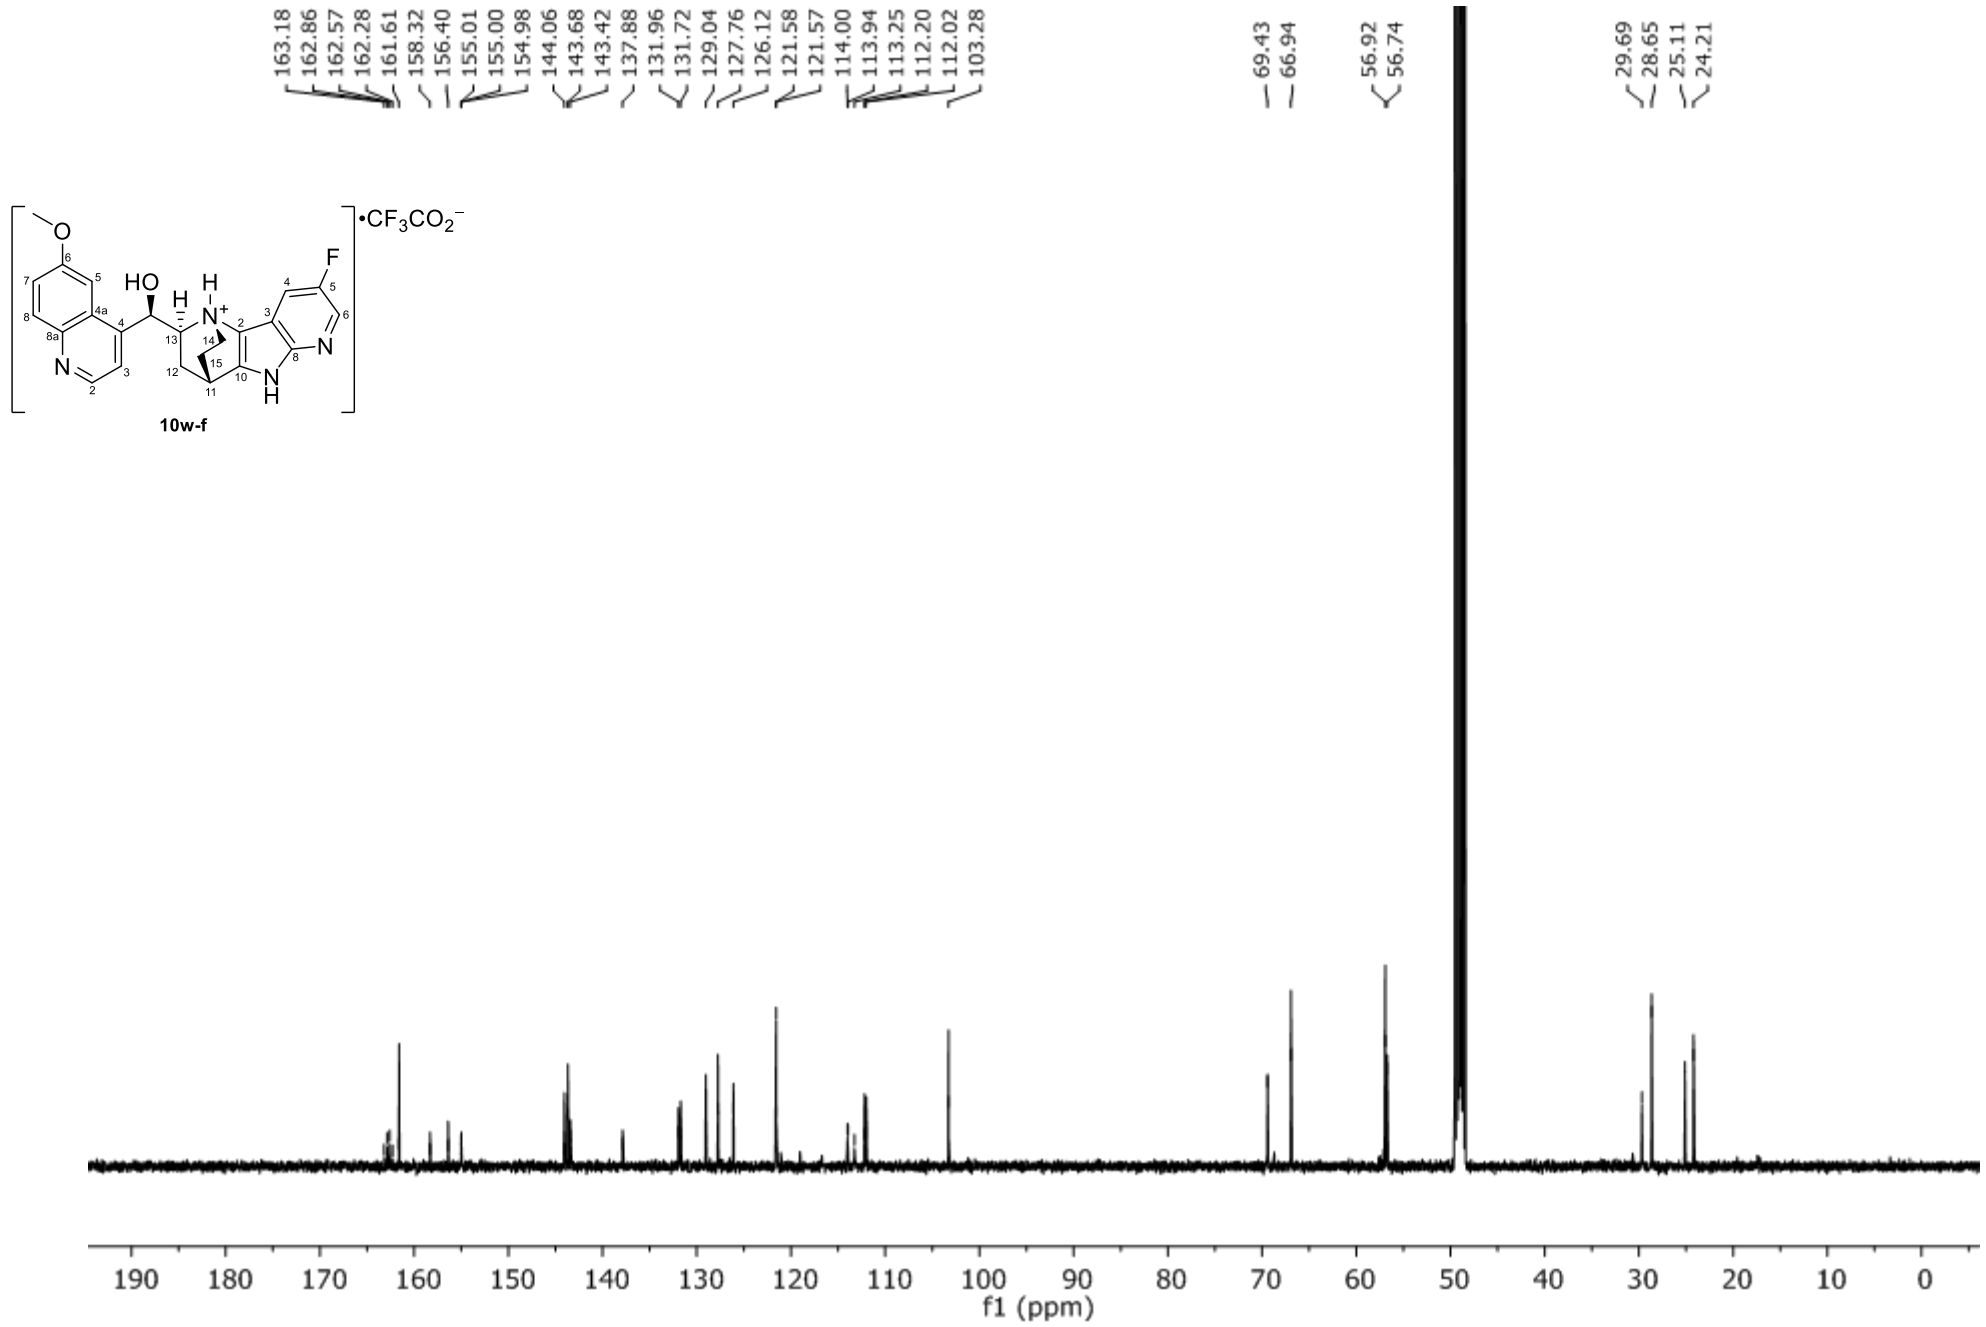



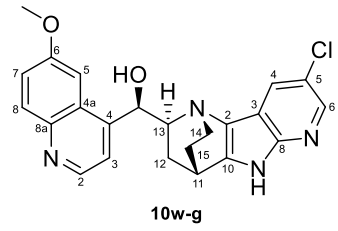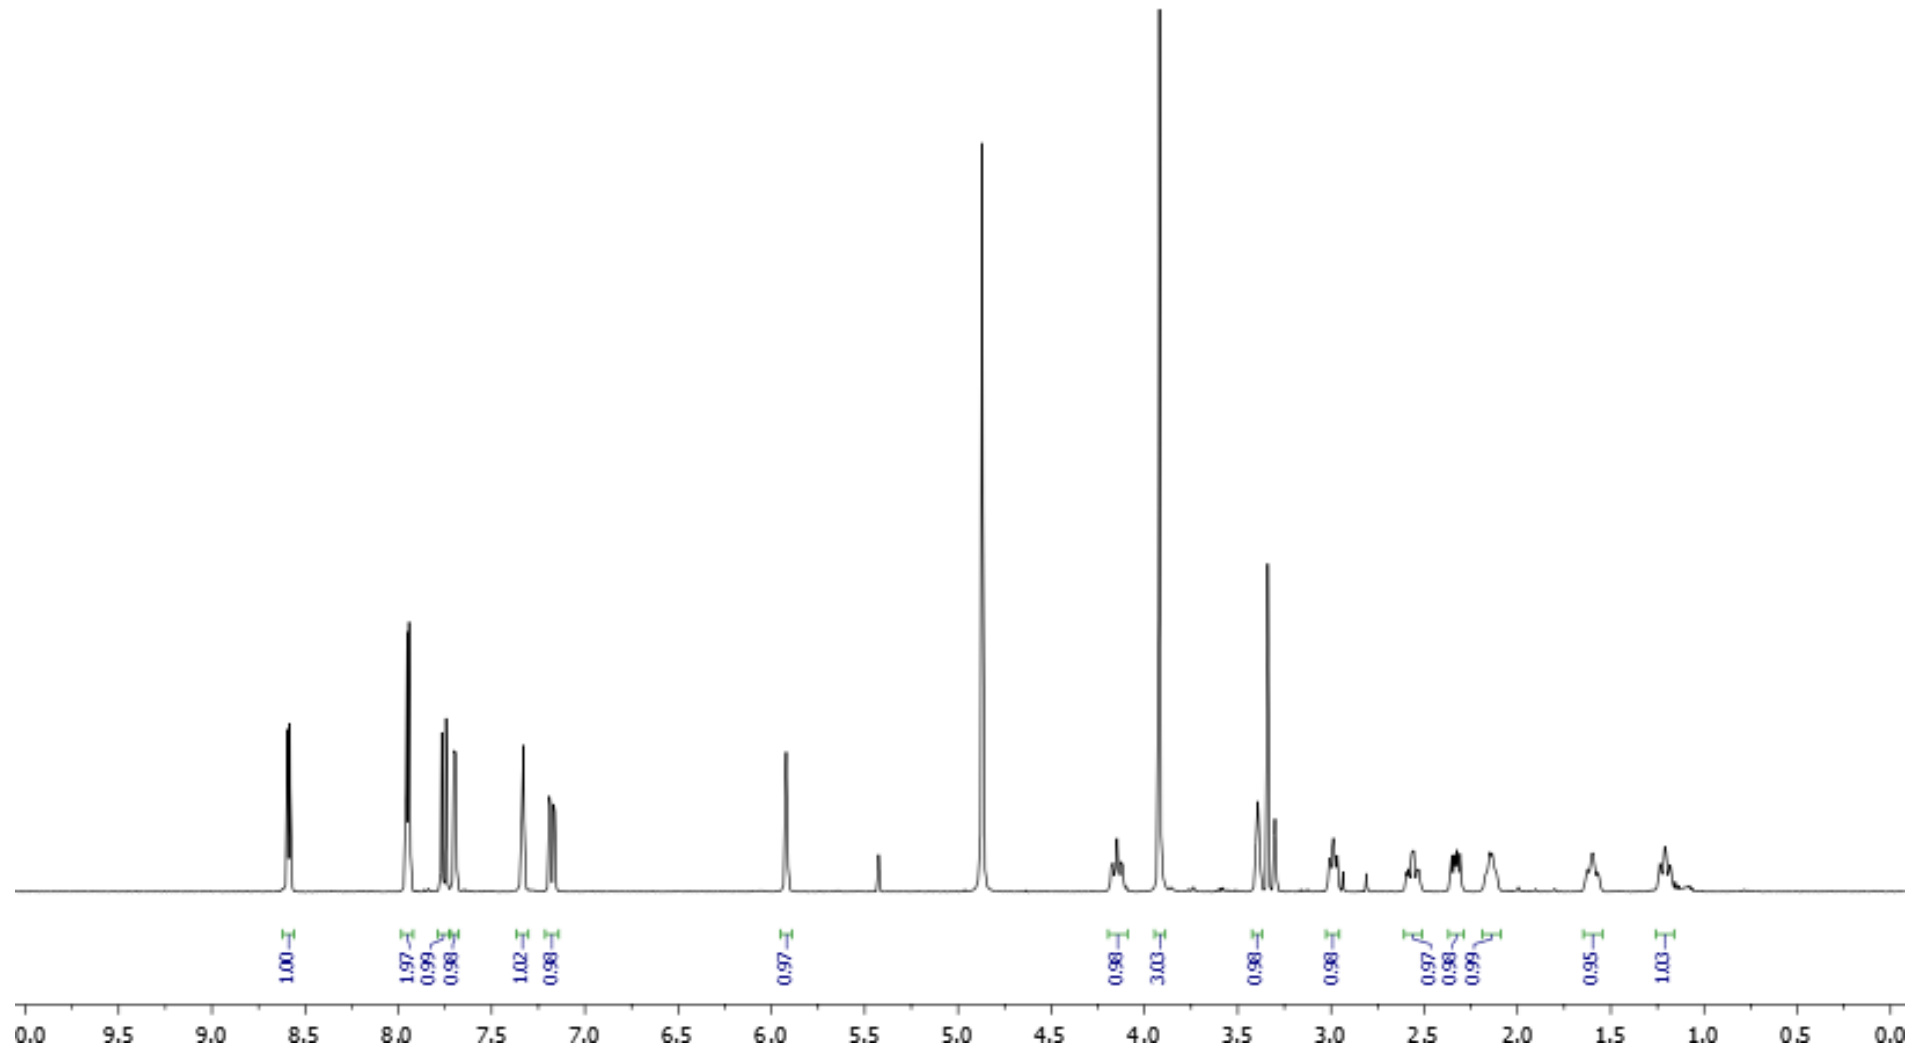

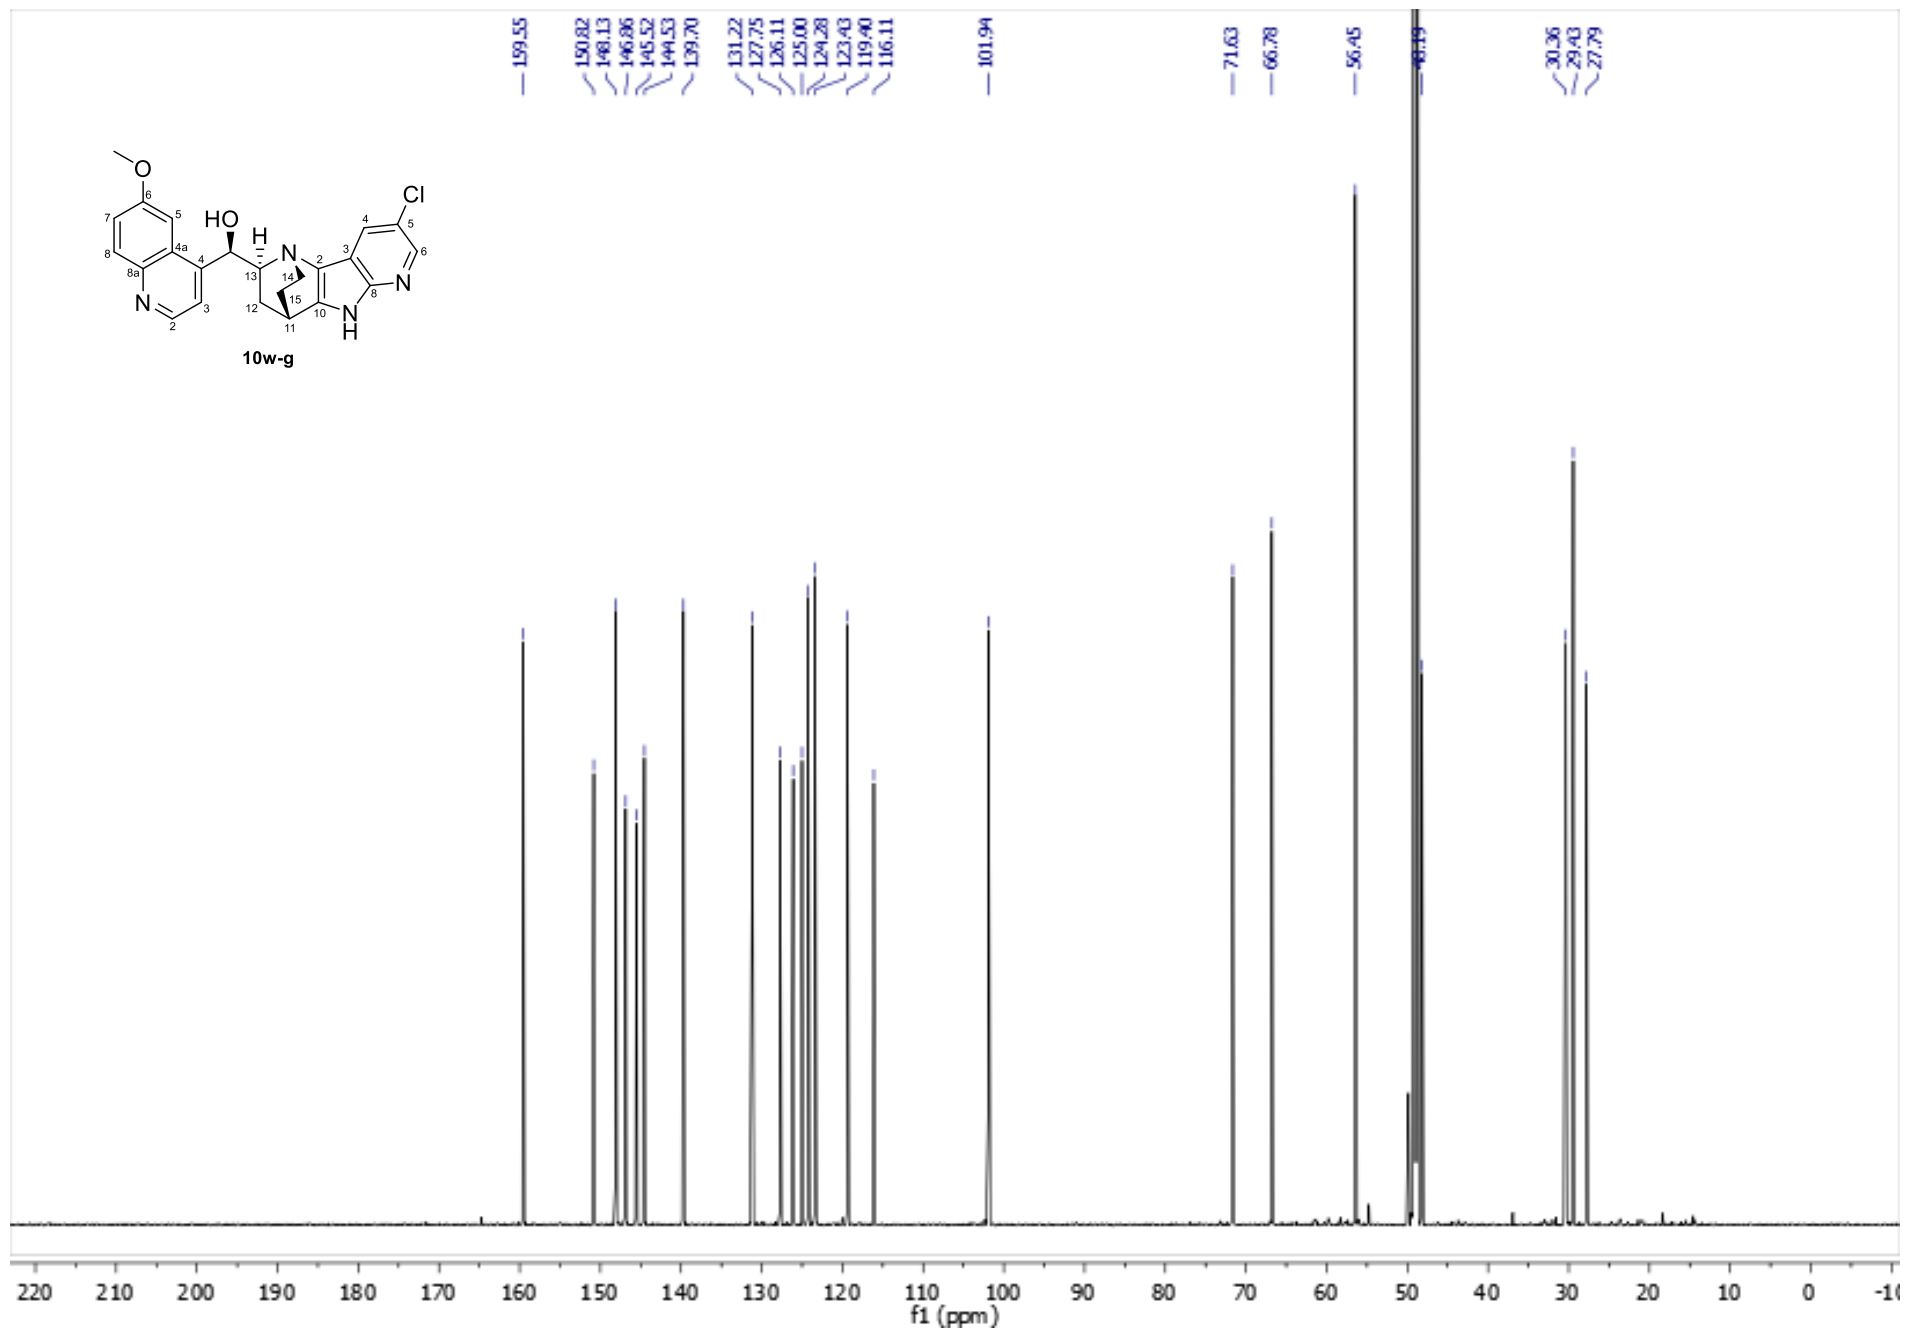

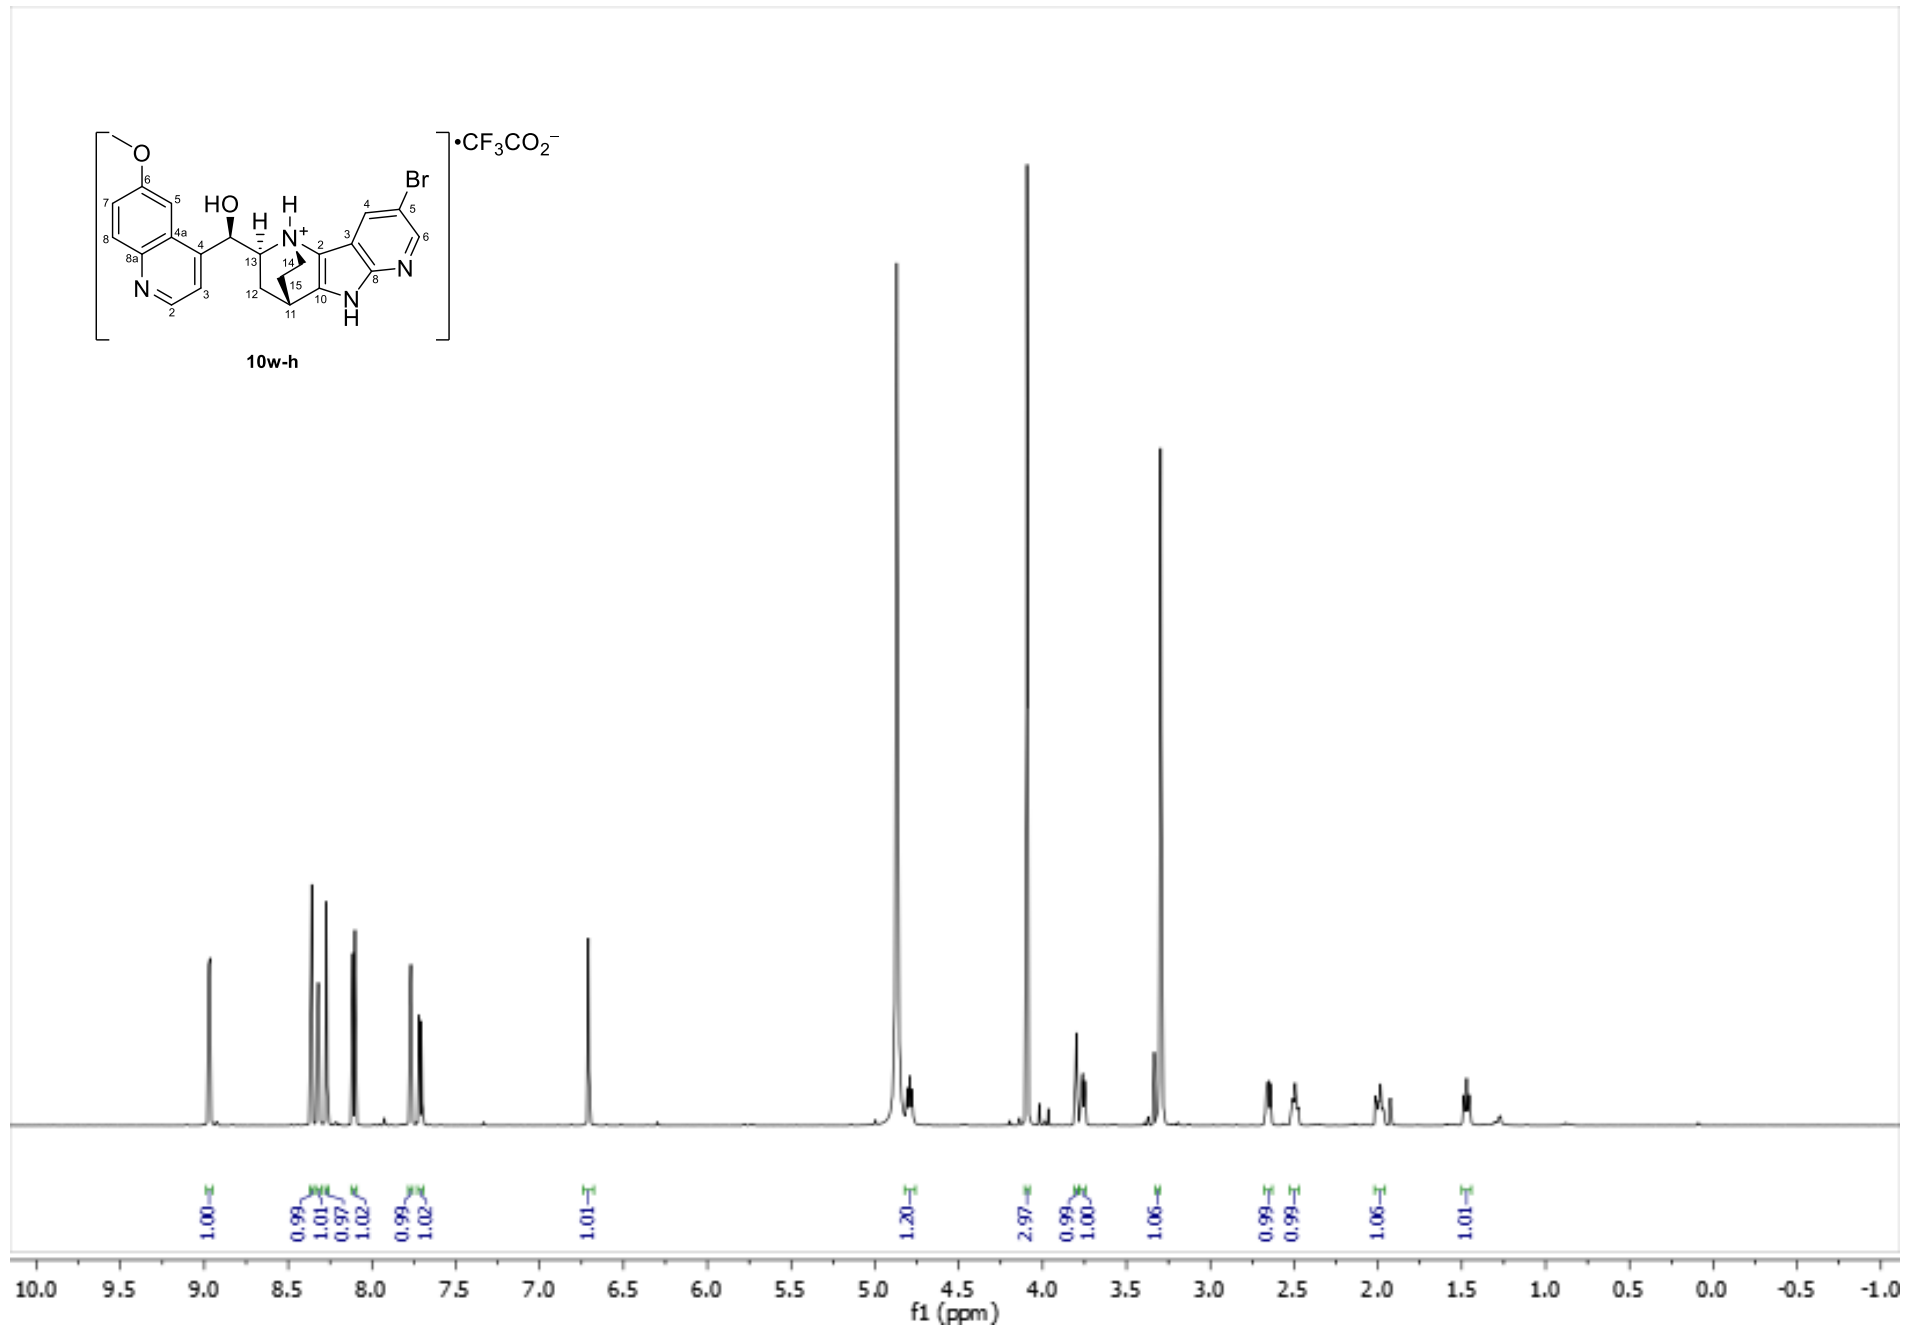

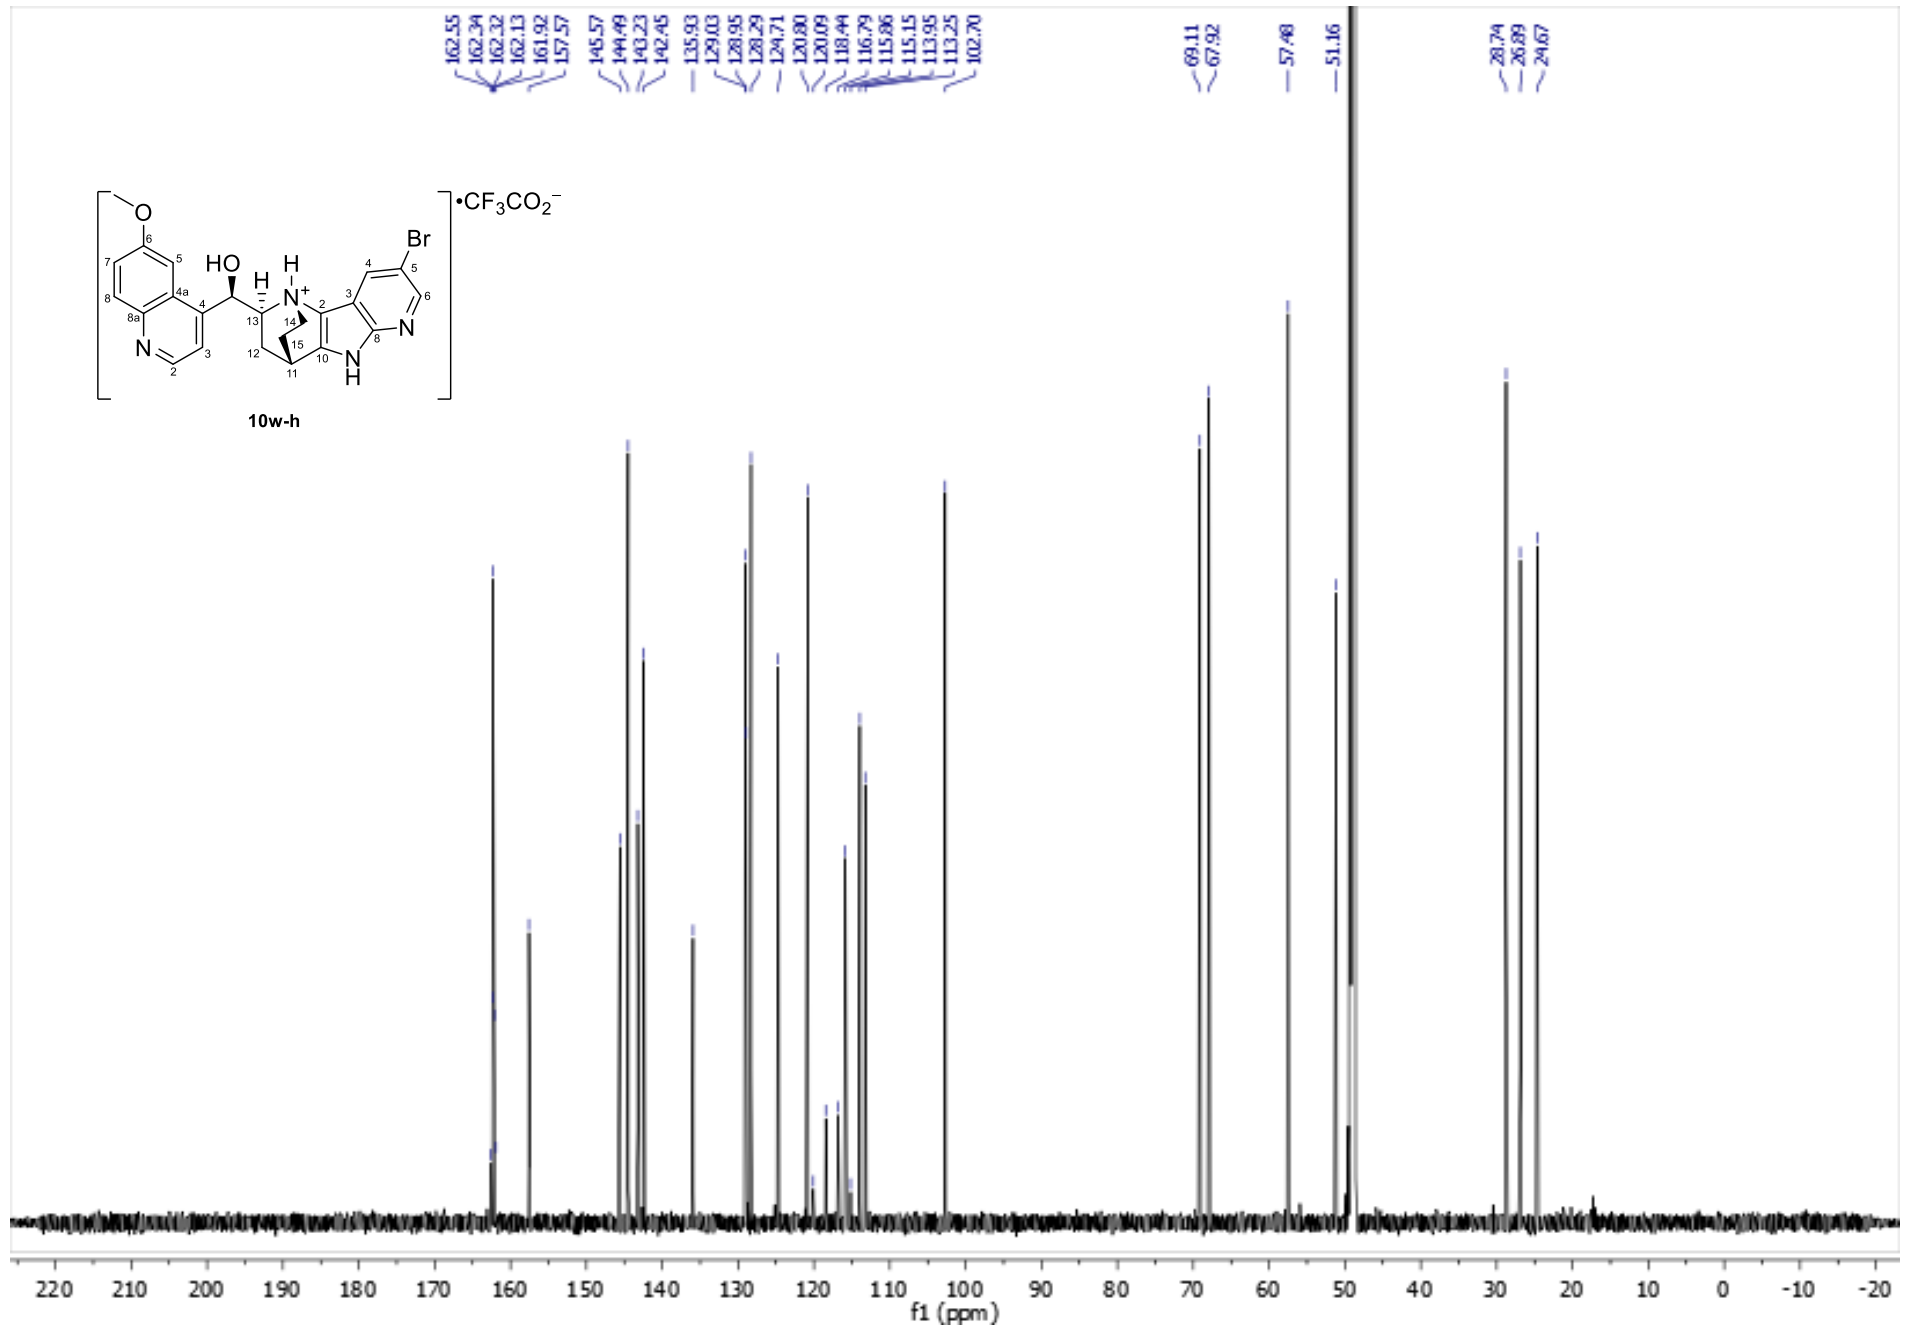

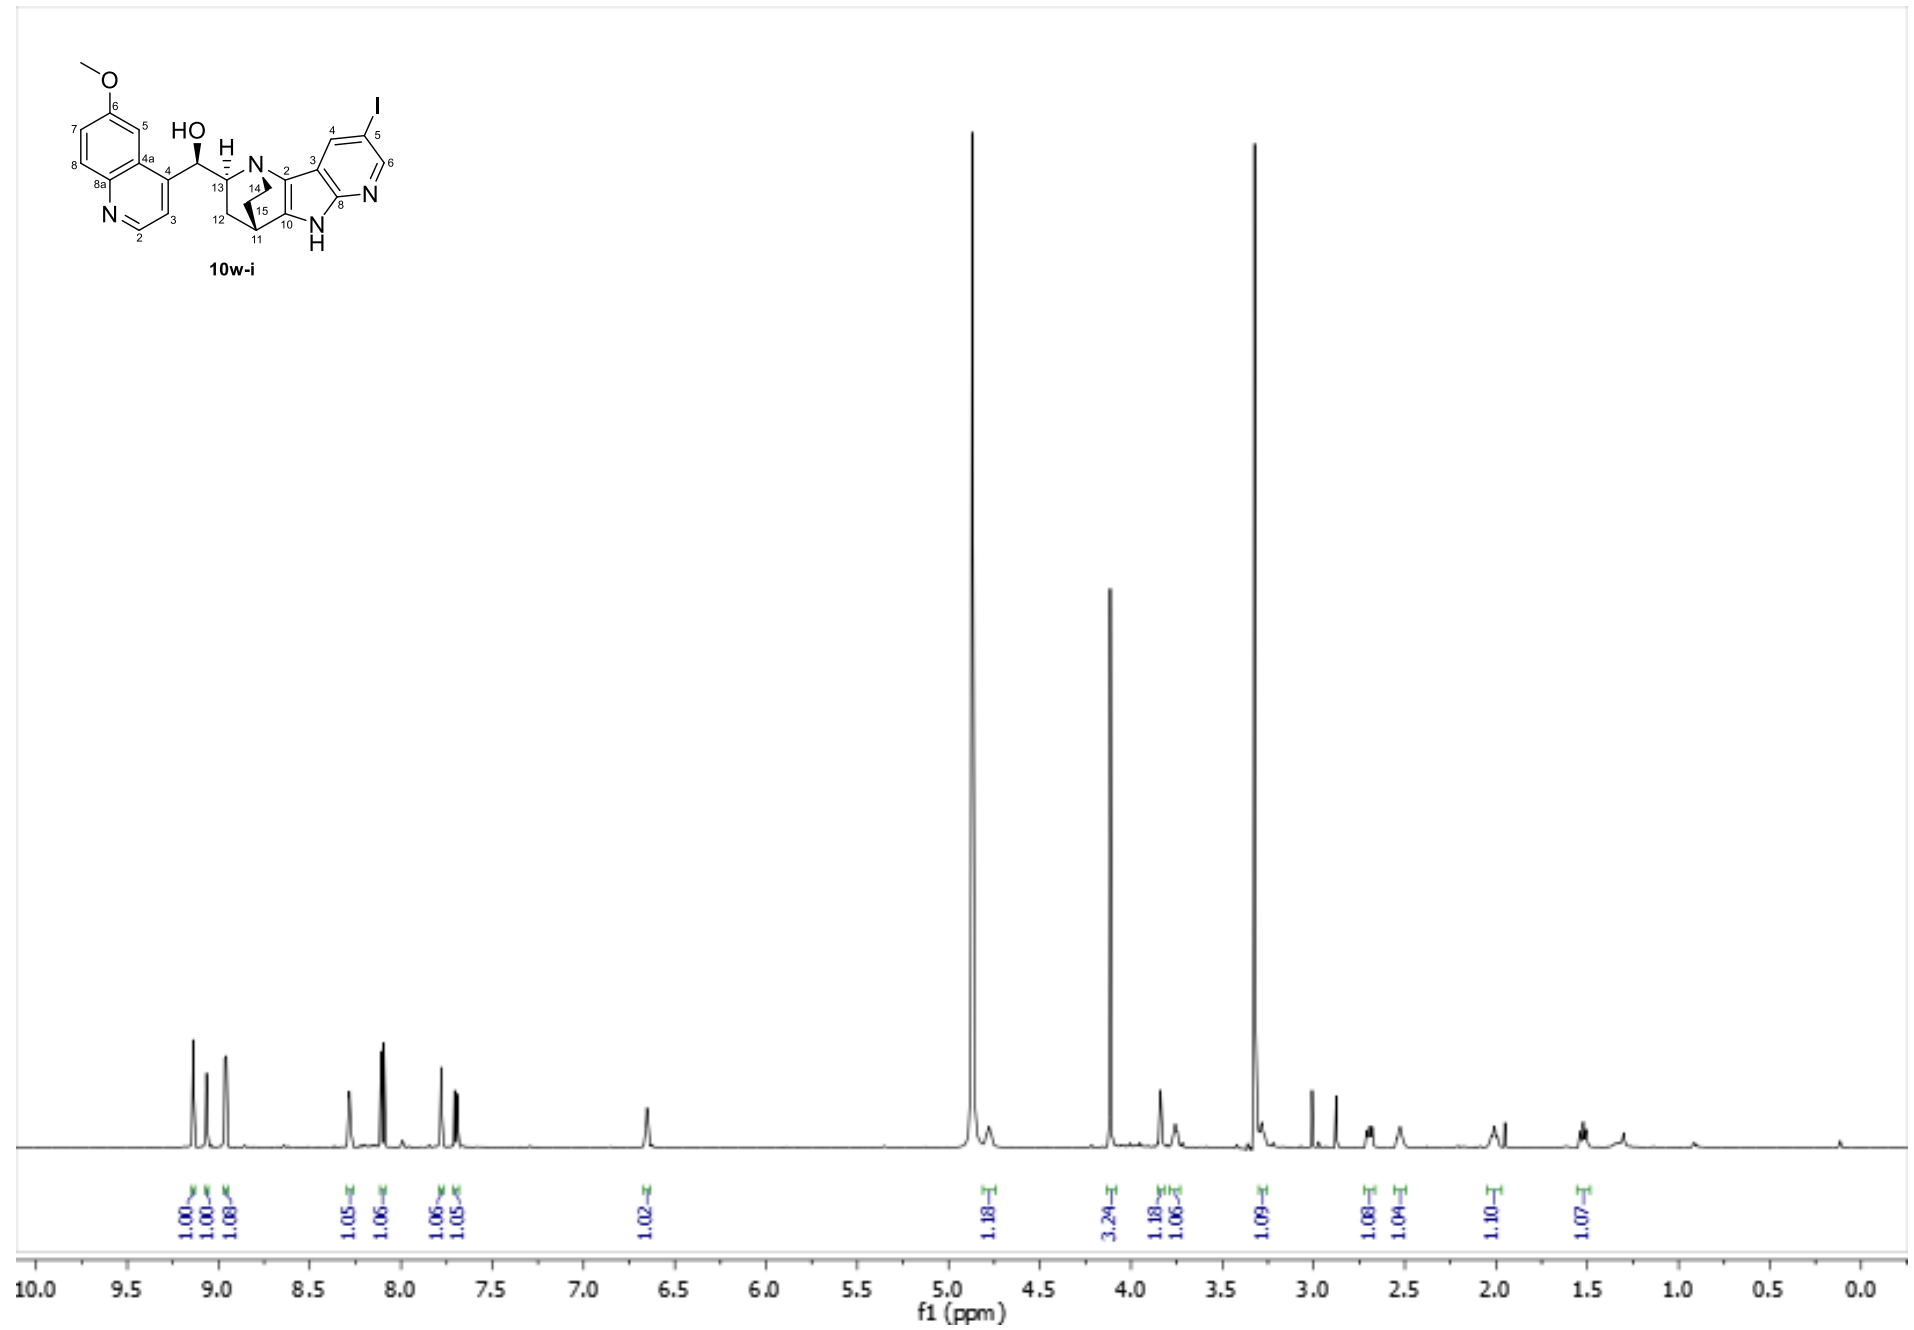

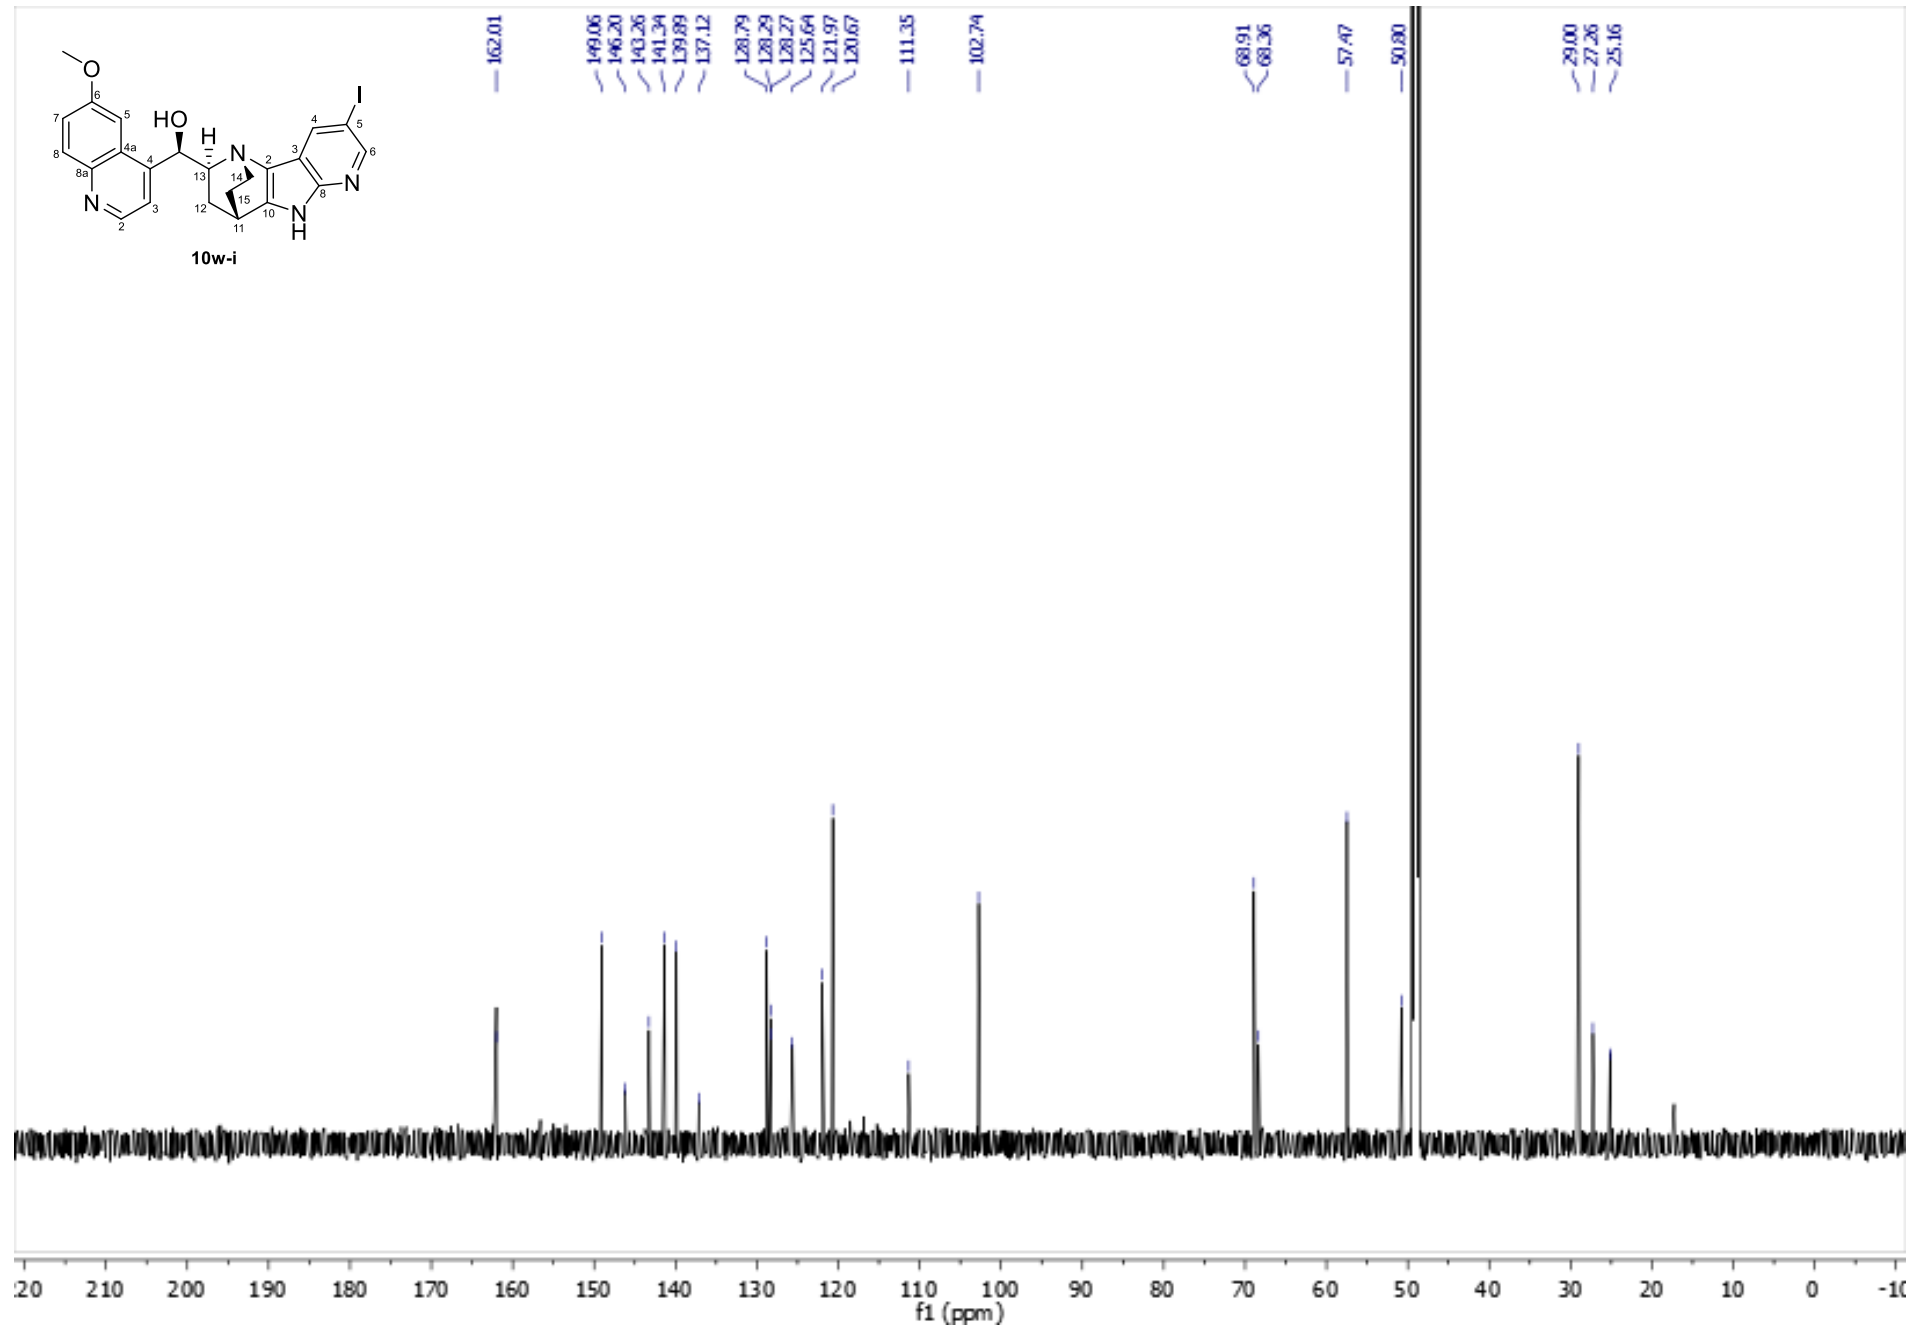

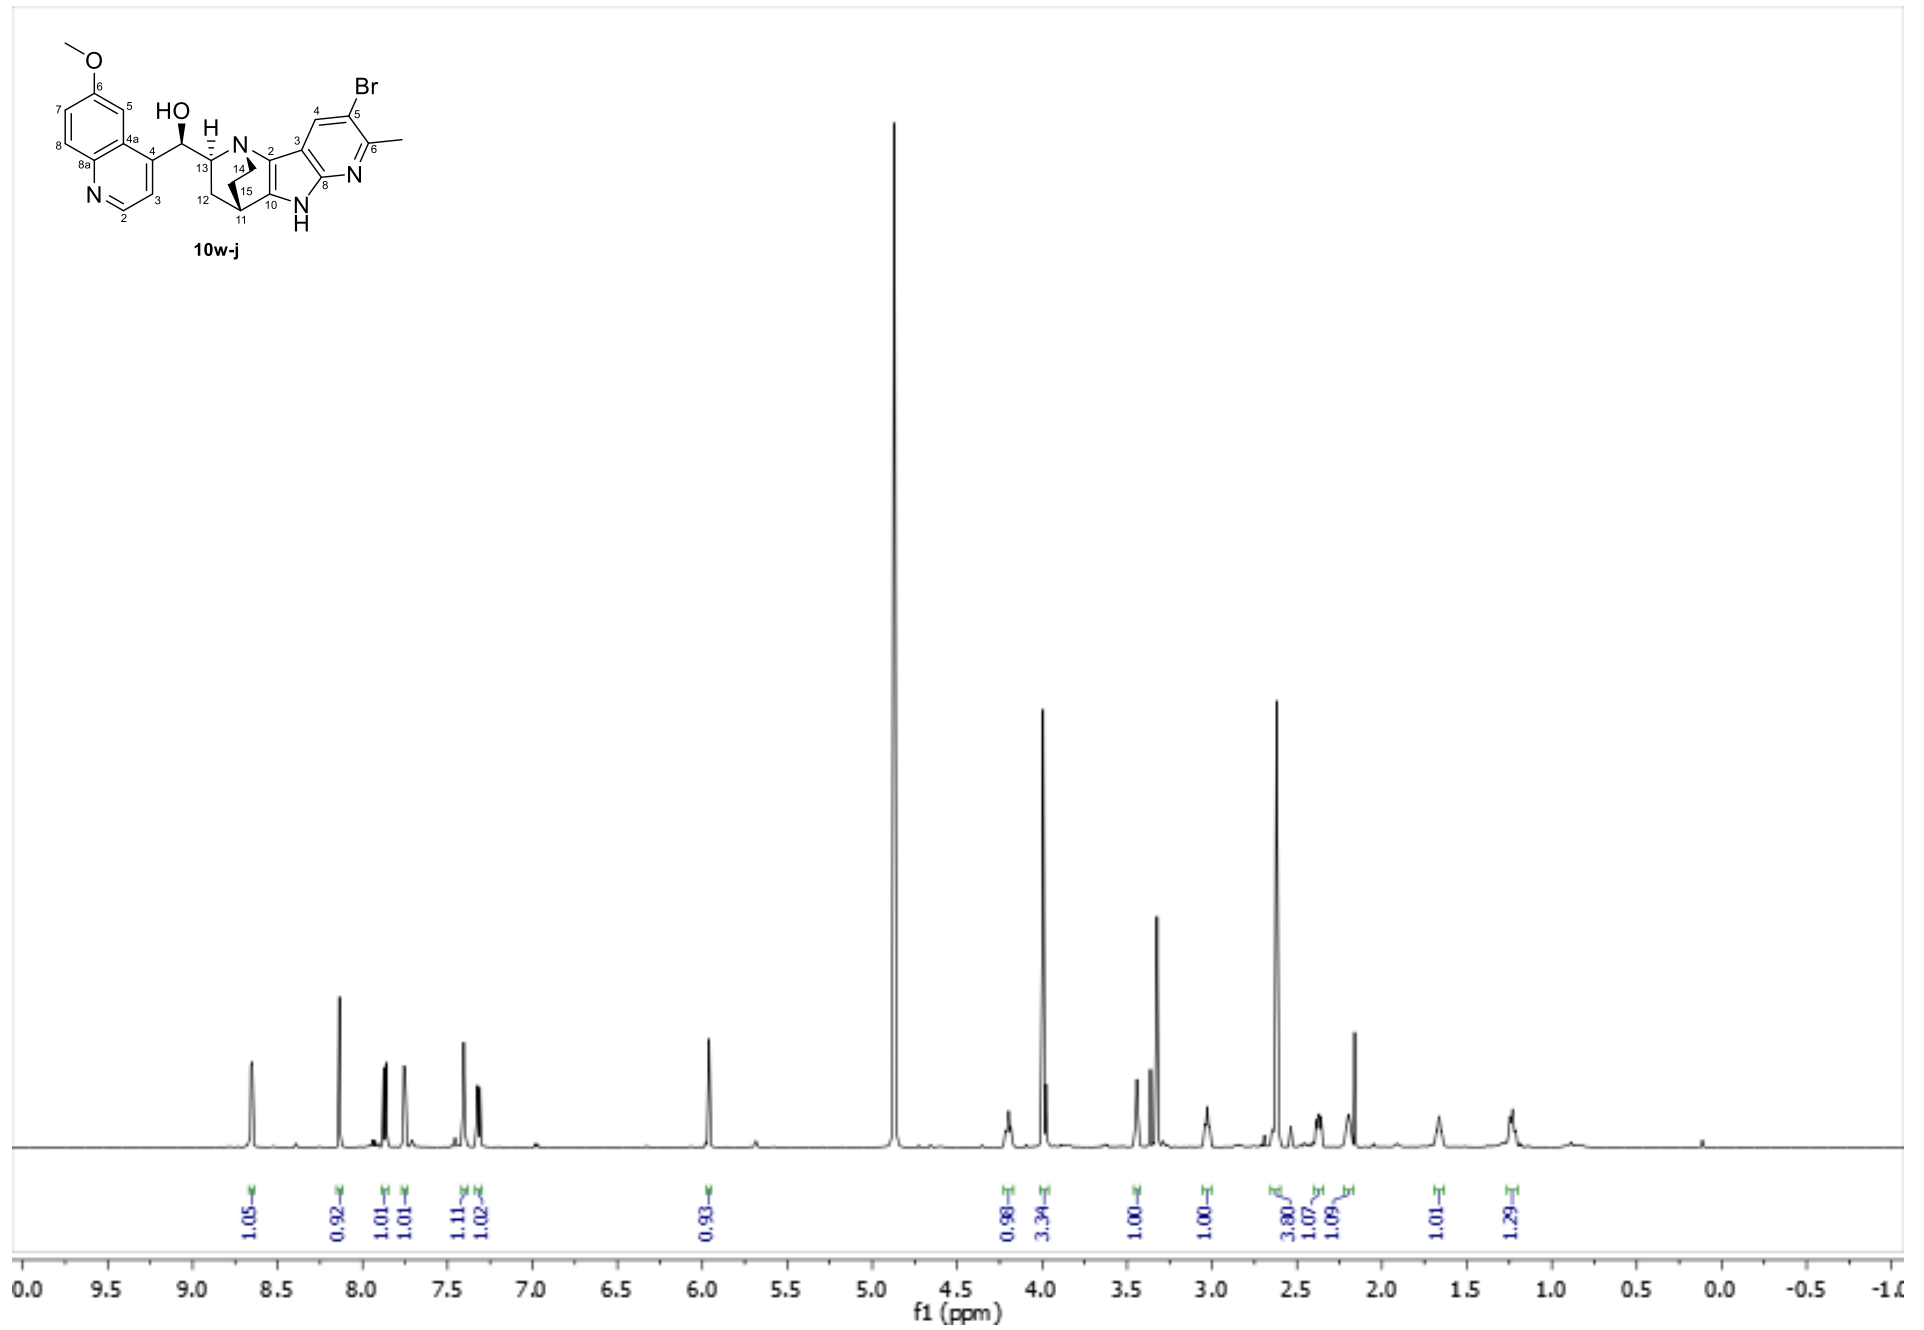

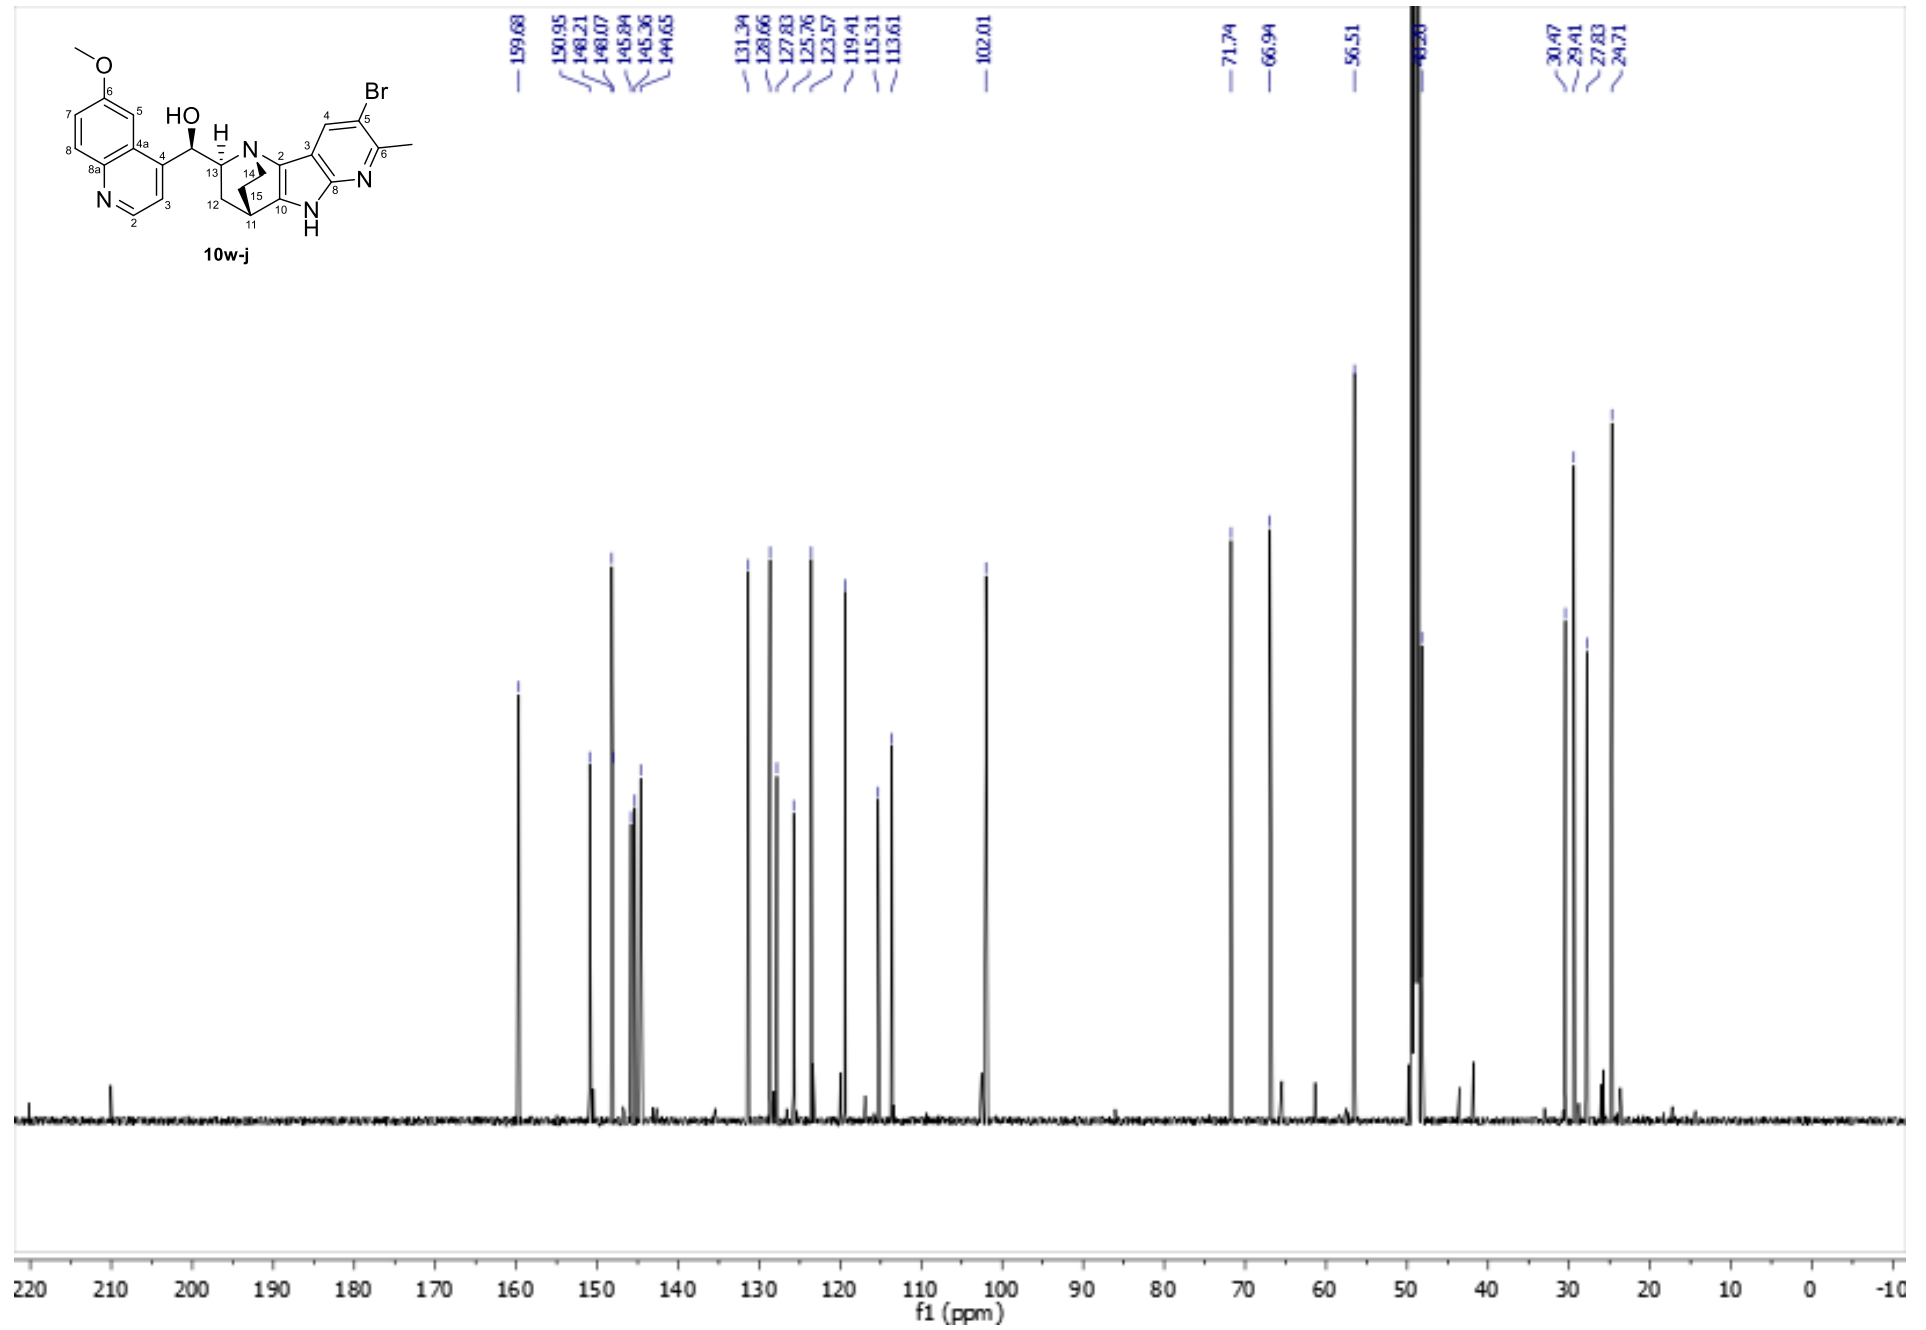



280

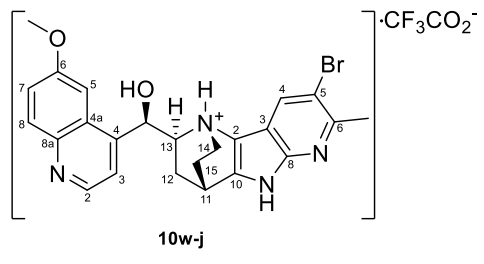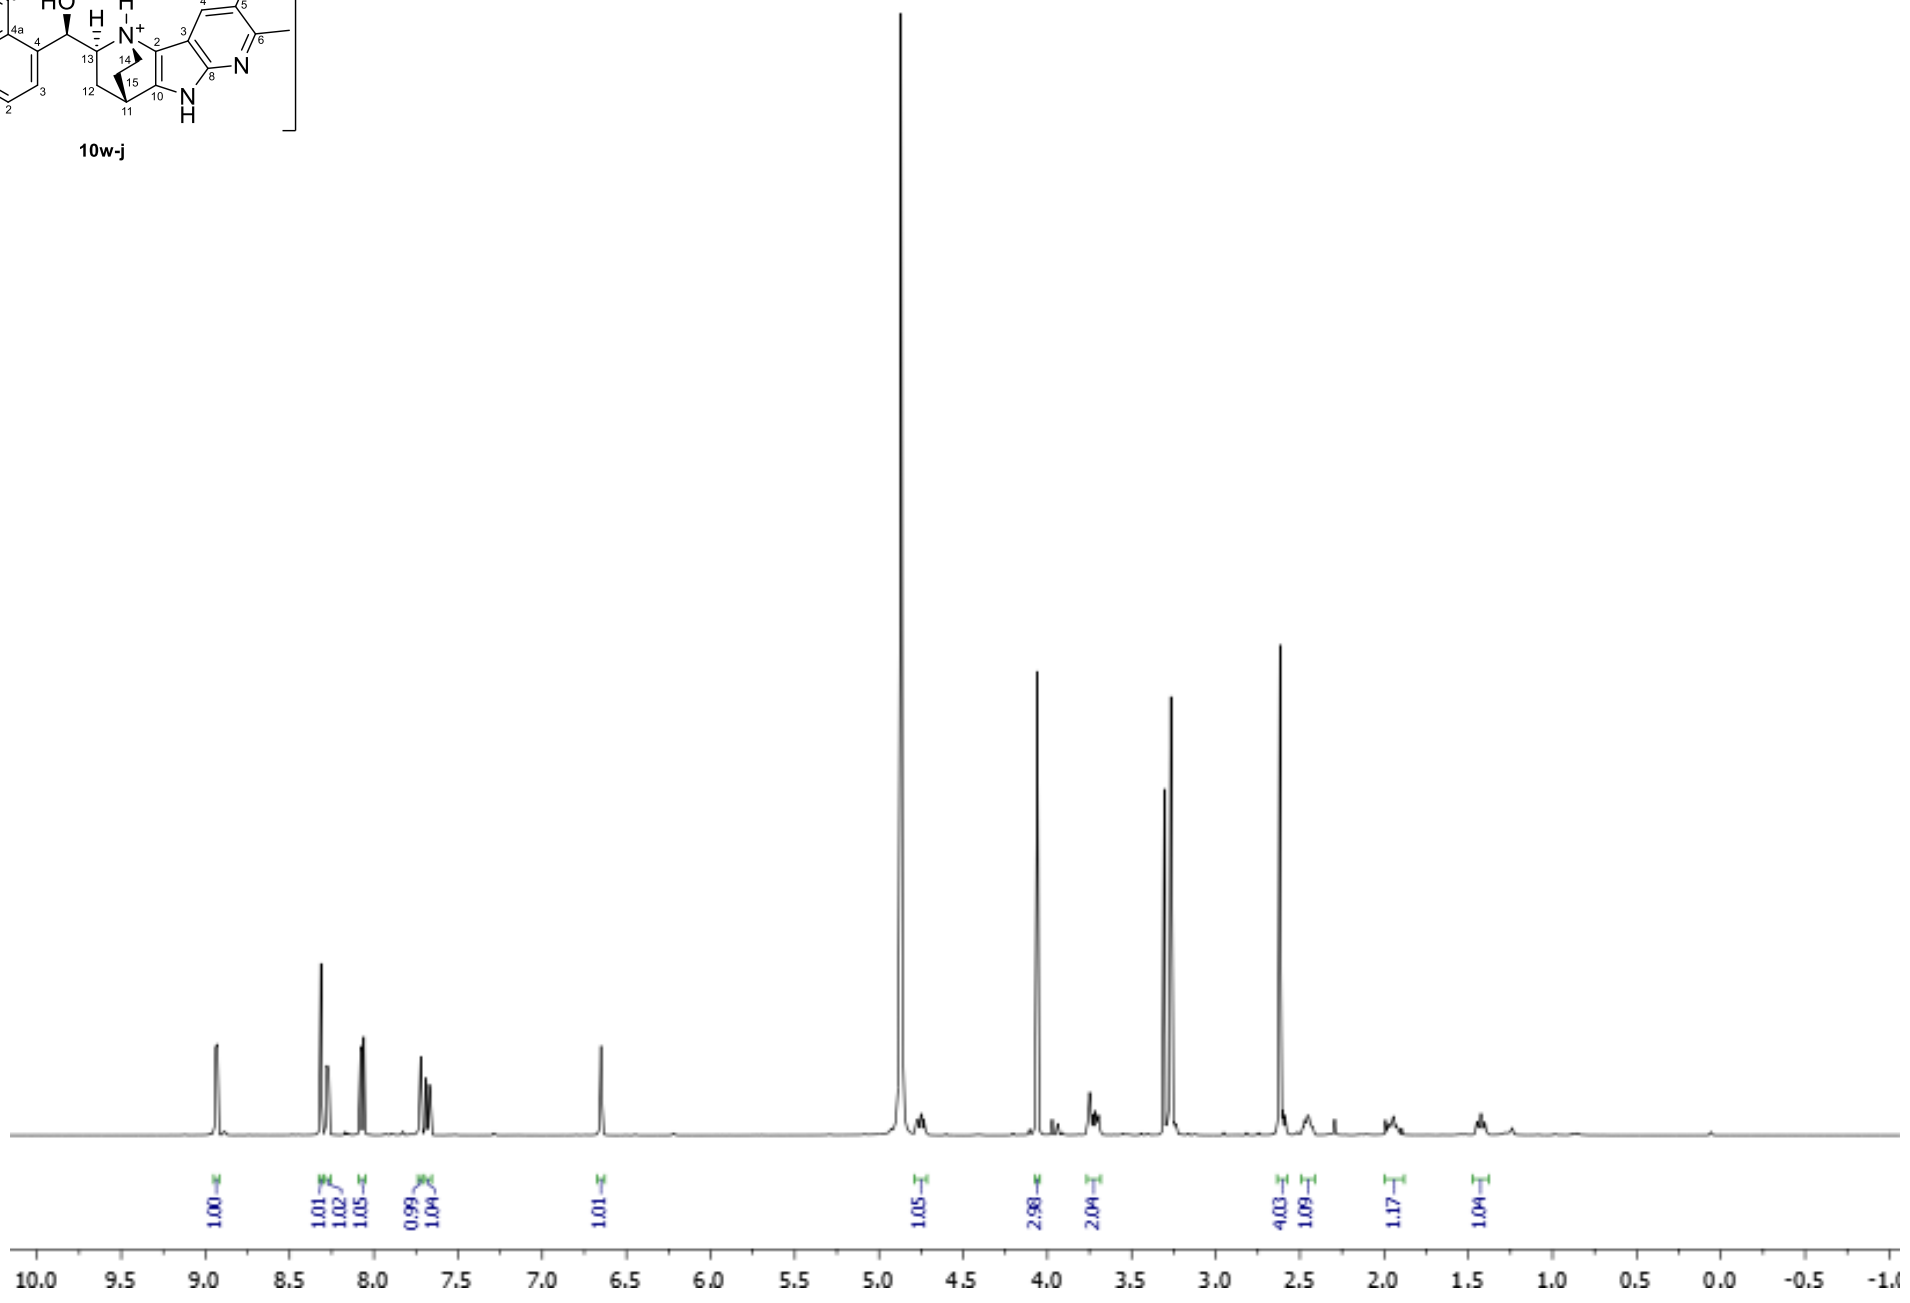

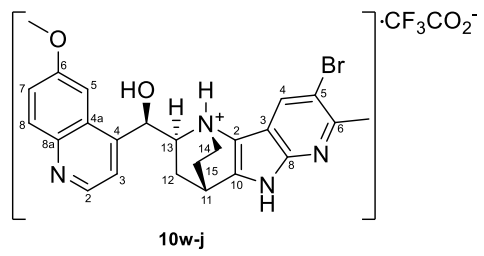

- 160.84
- 155.92
- 149.79
- 144.24
- 141.23
- 140.60
- 134.77
- 128.14
- 127.90
- 123.90
- 119.36
- 114.19
- 113.45
- 110.15
- 101.25

- 67.78
- 66.54

- 56.06

- 49.75

- 27.29
- 25.57
- 23.69
- 23.32

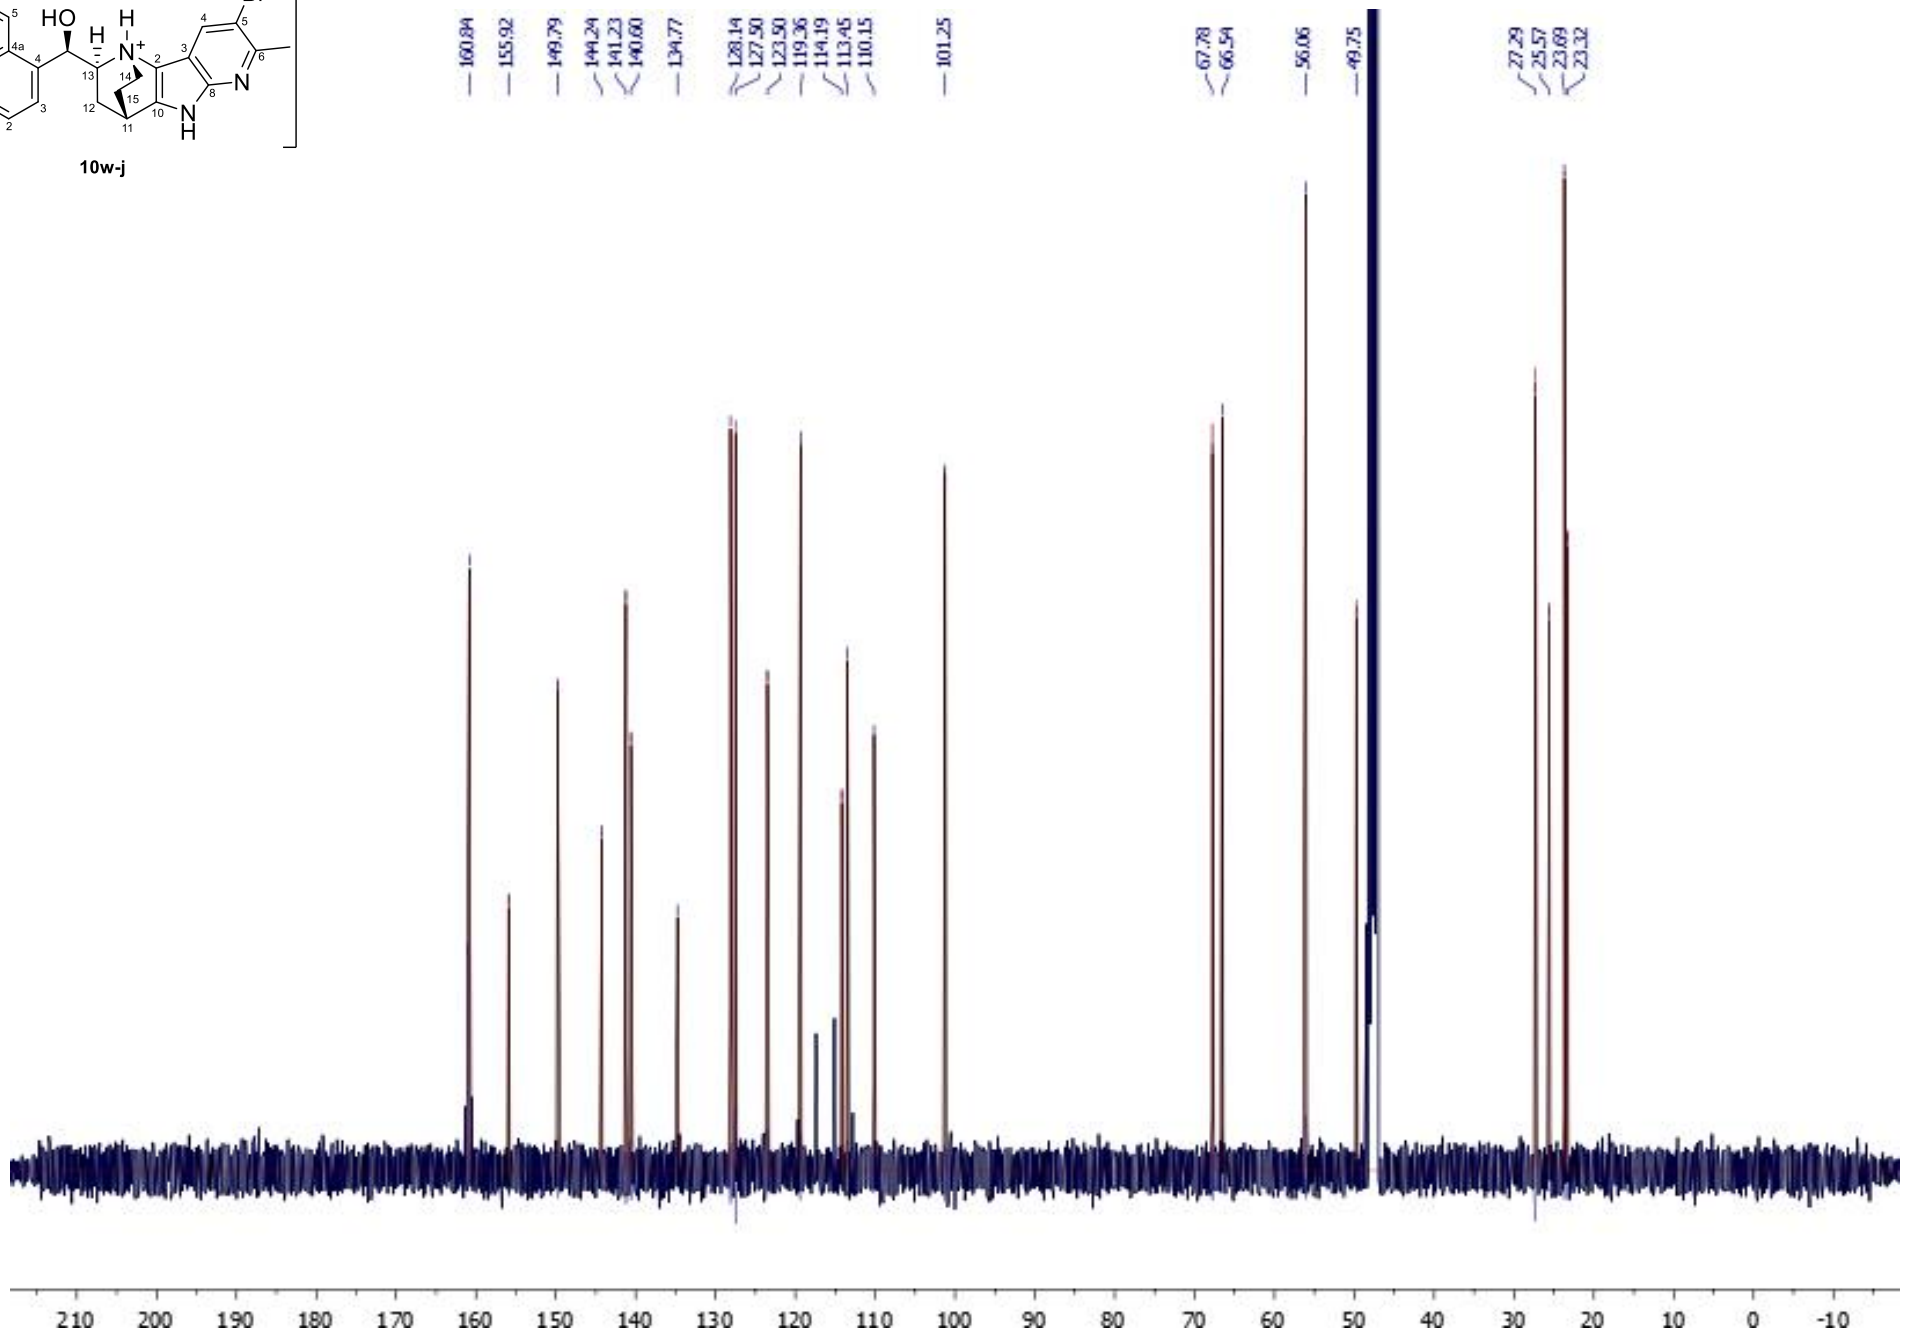

282

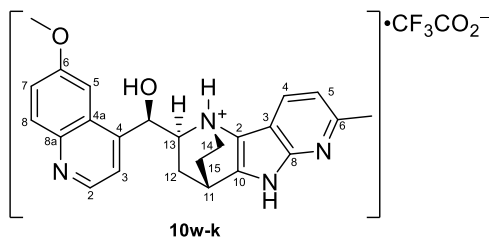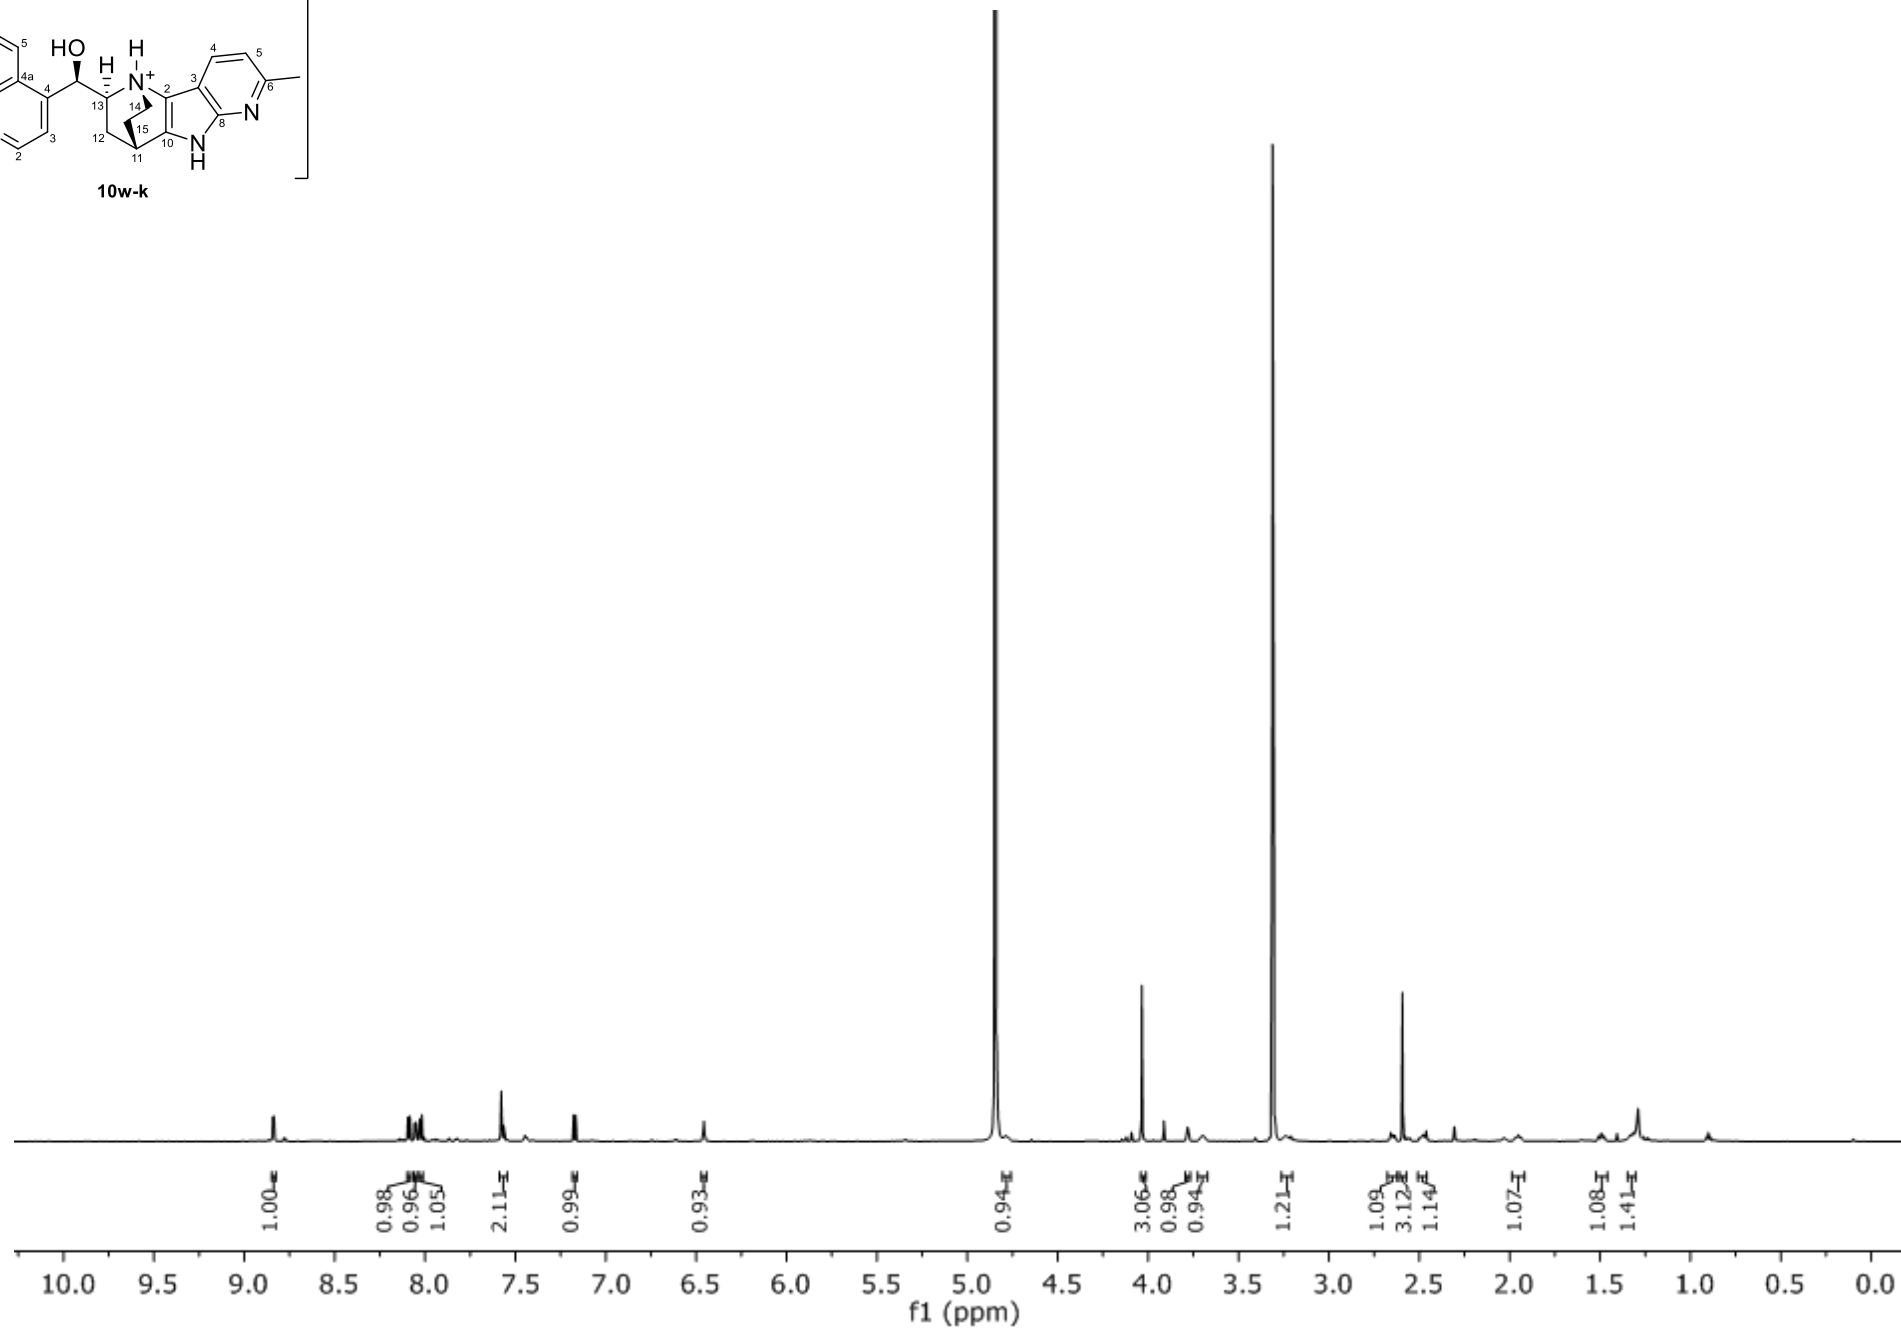

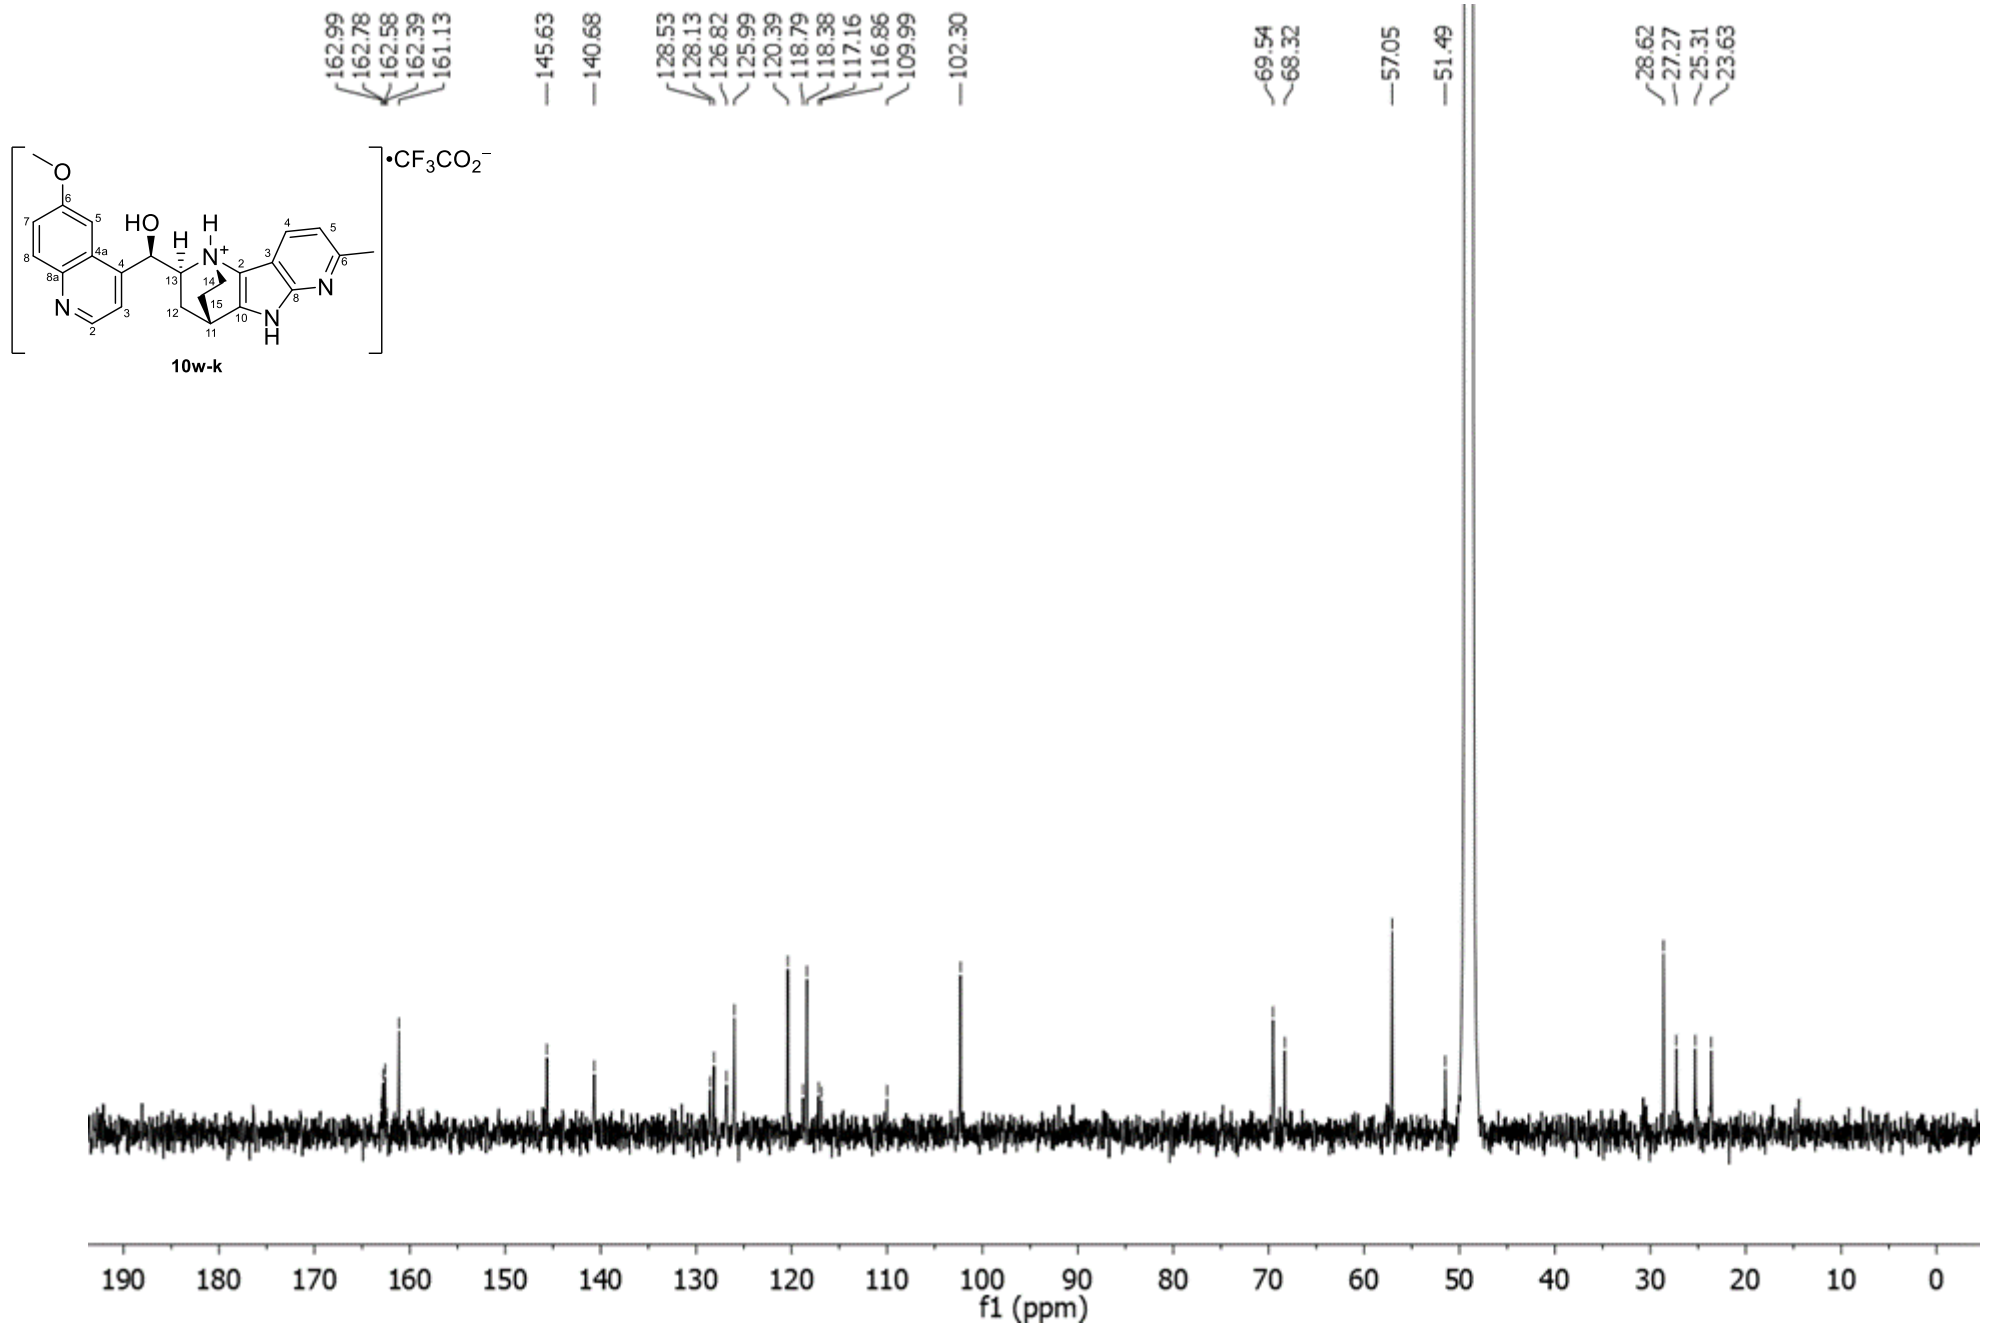

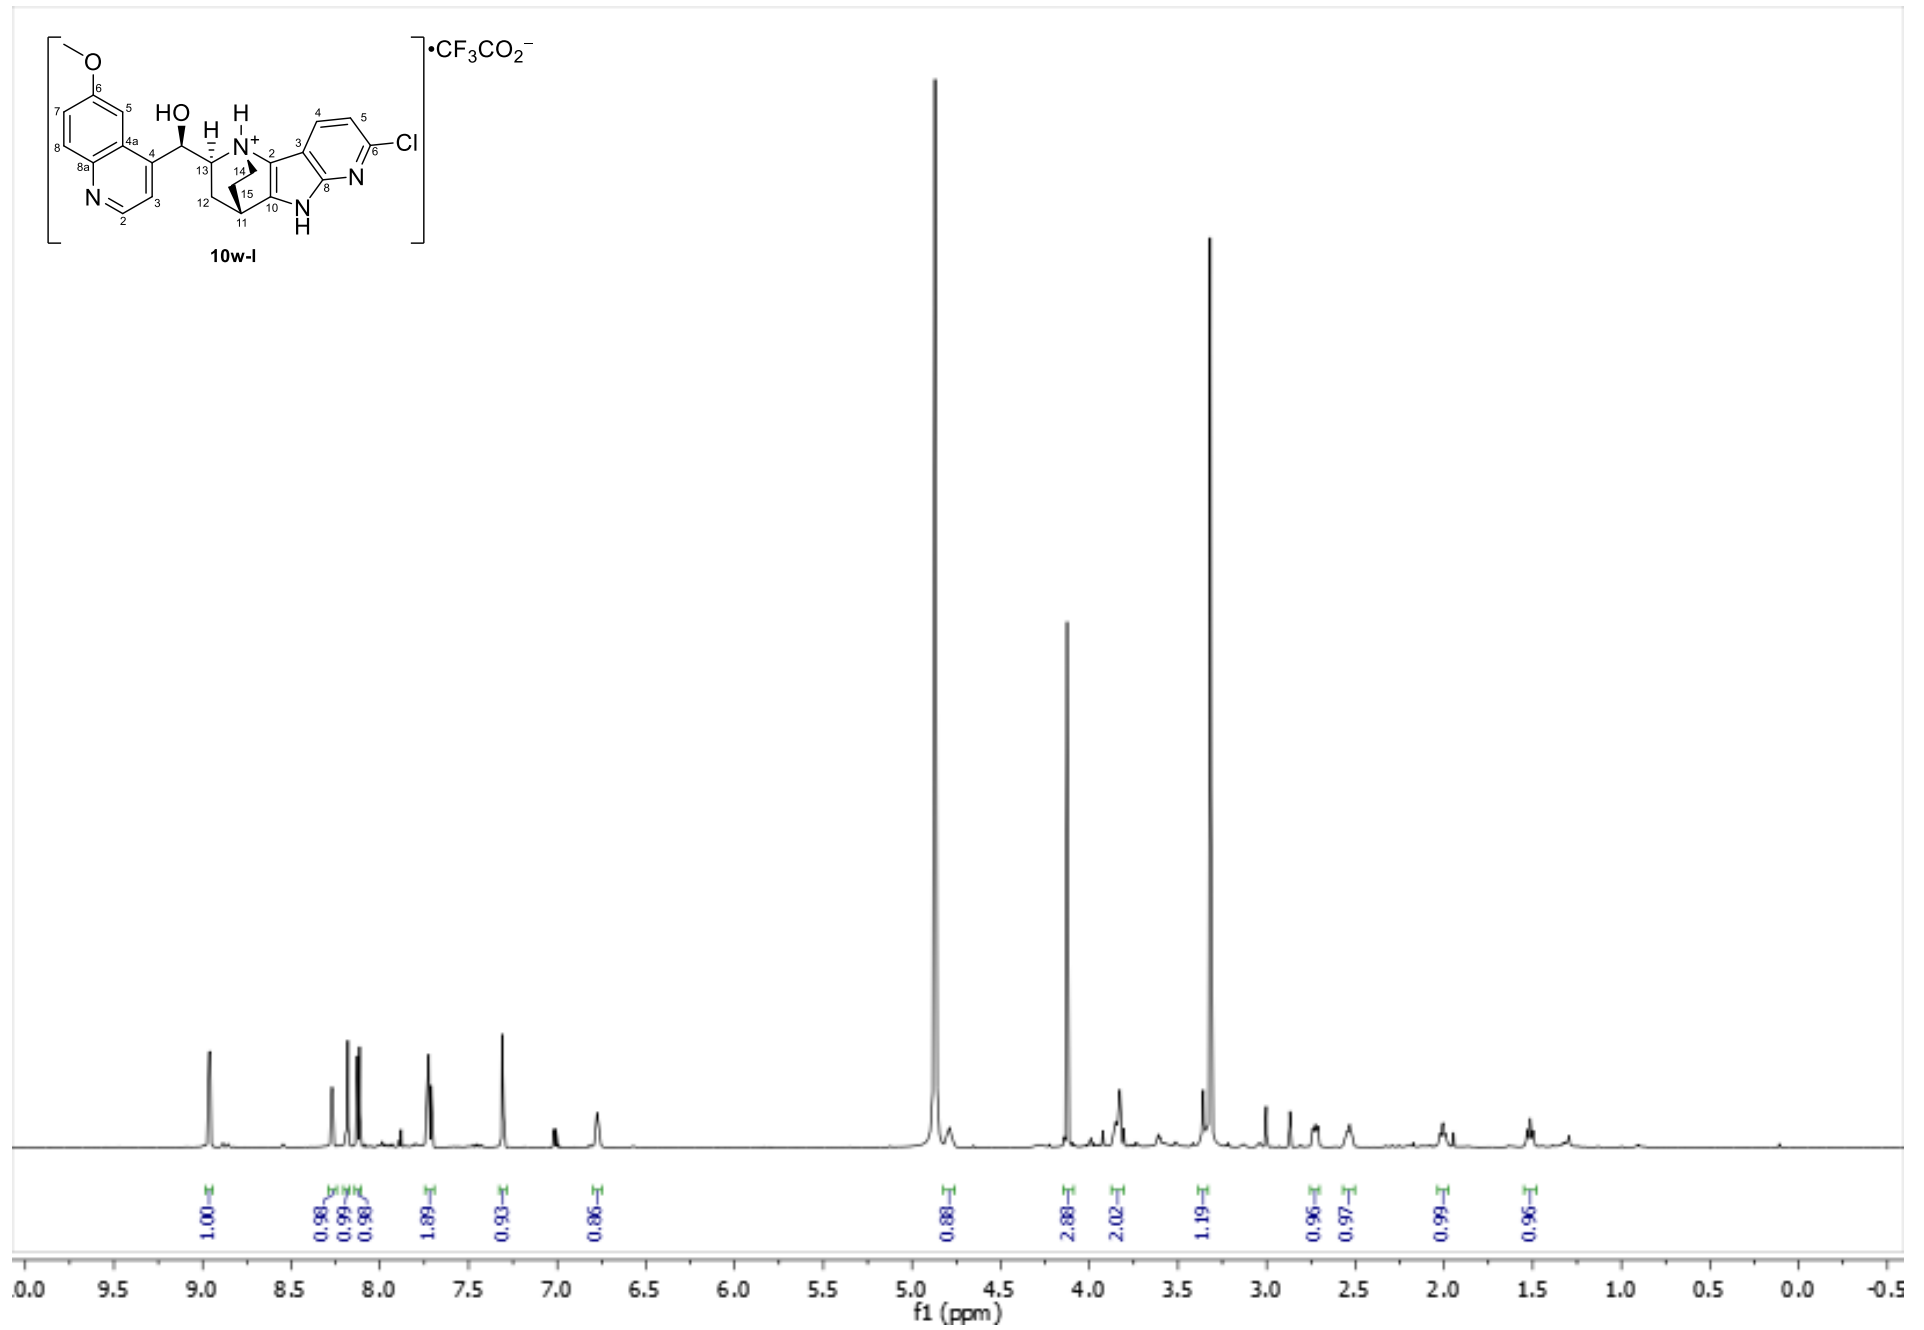

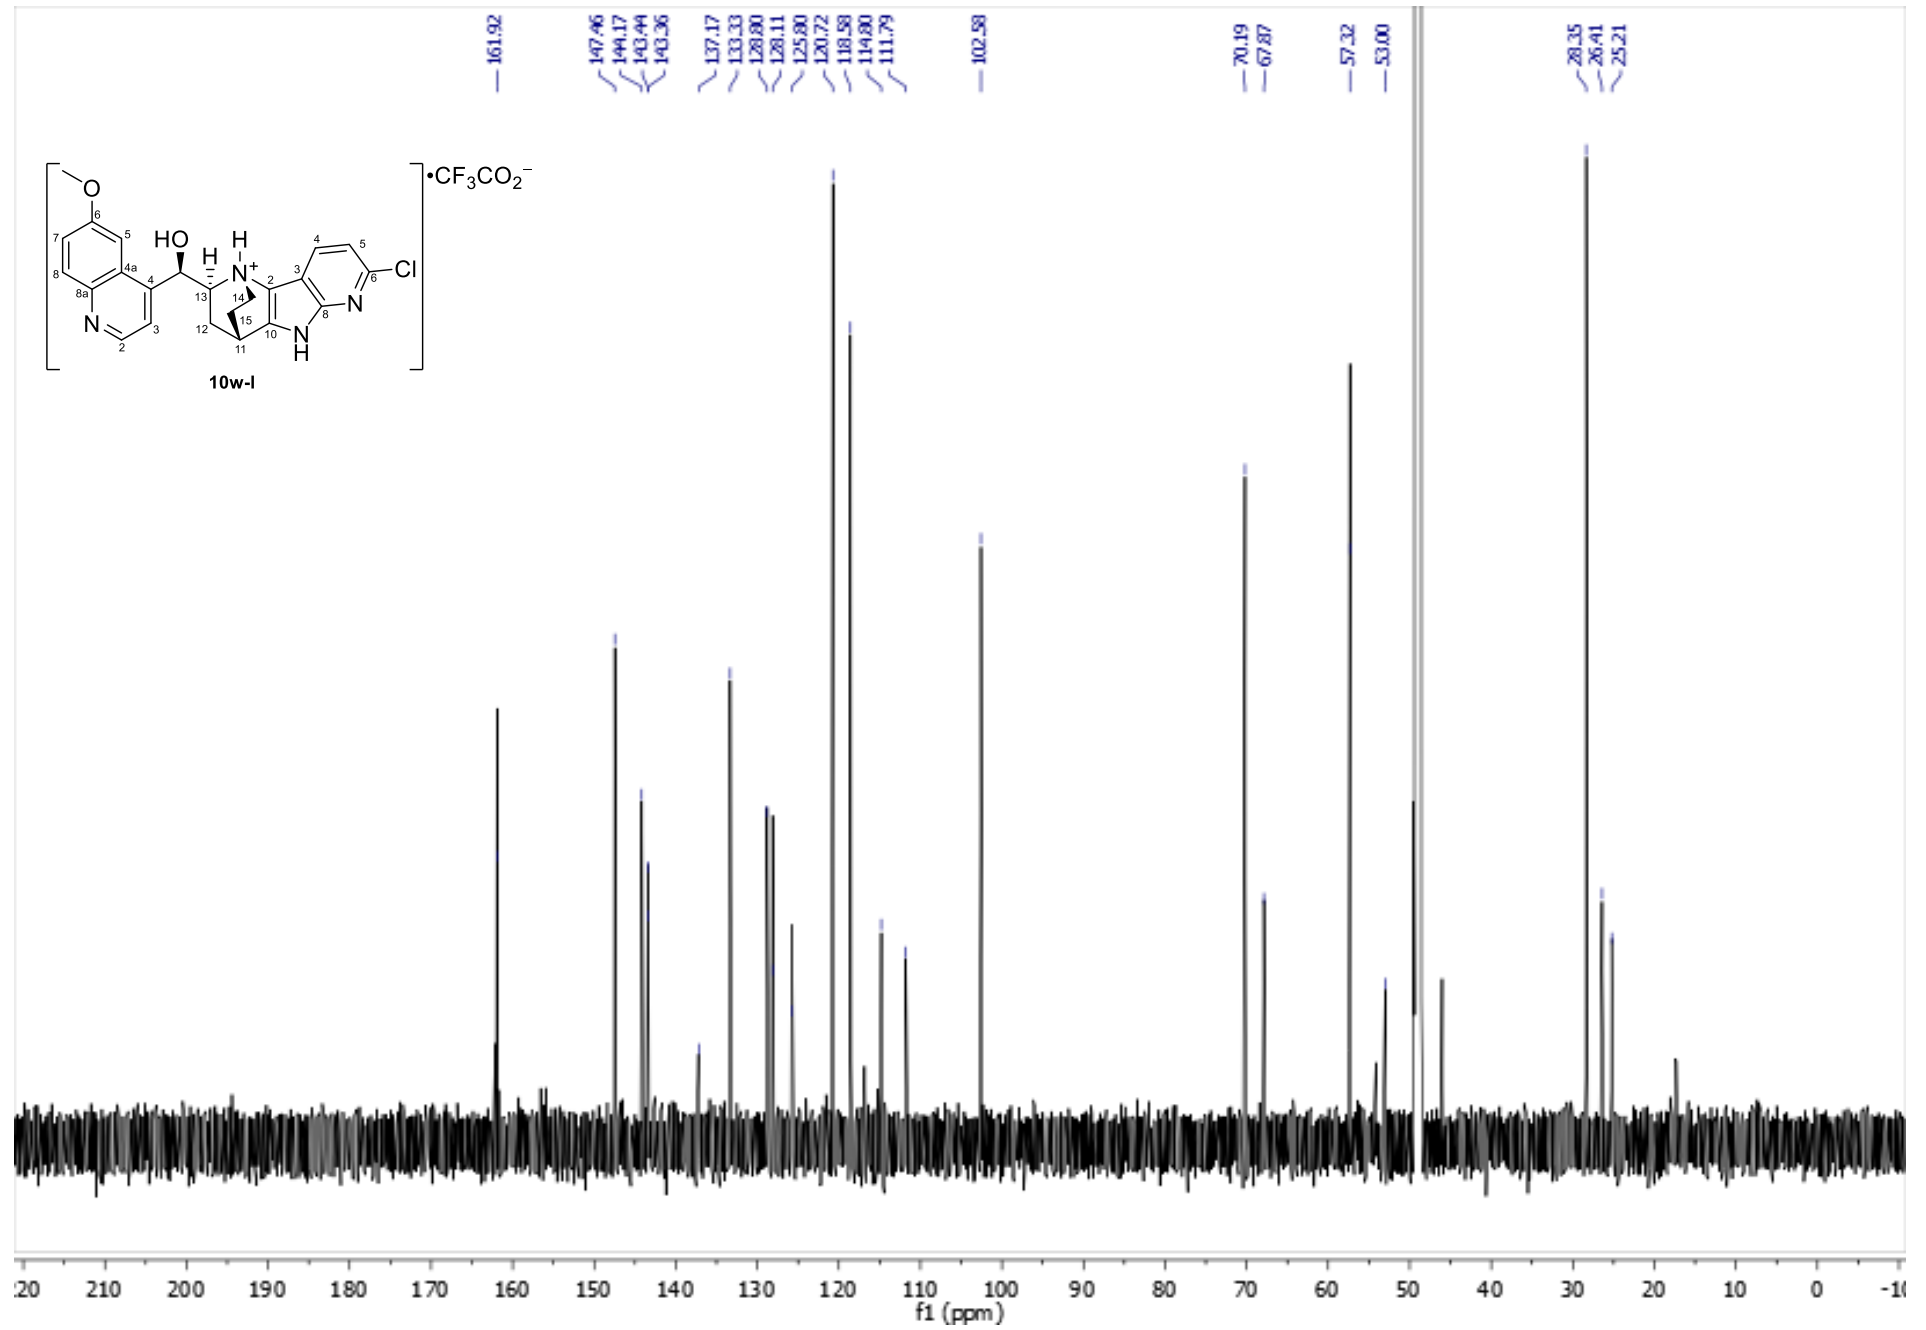

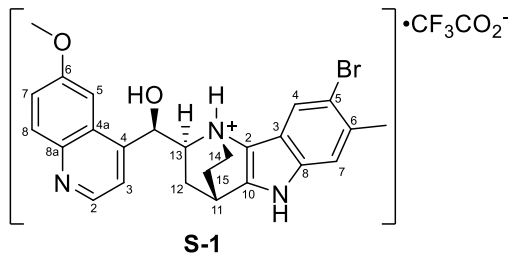

286

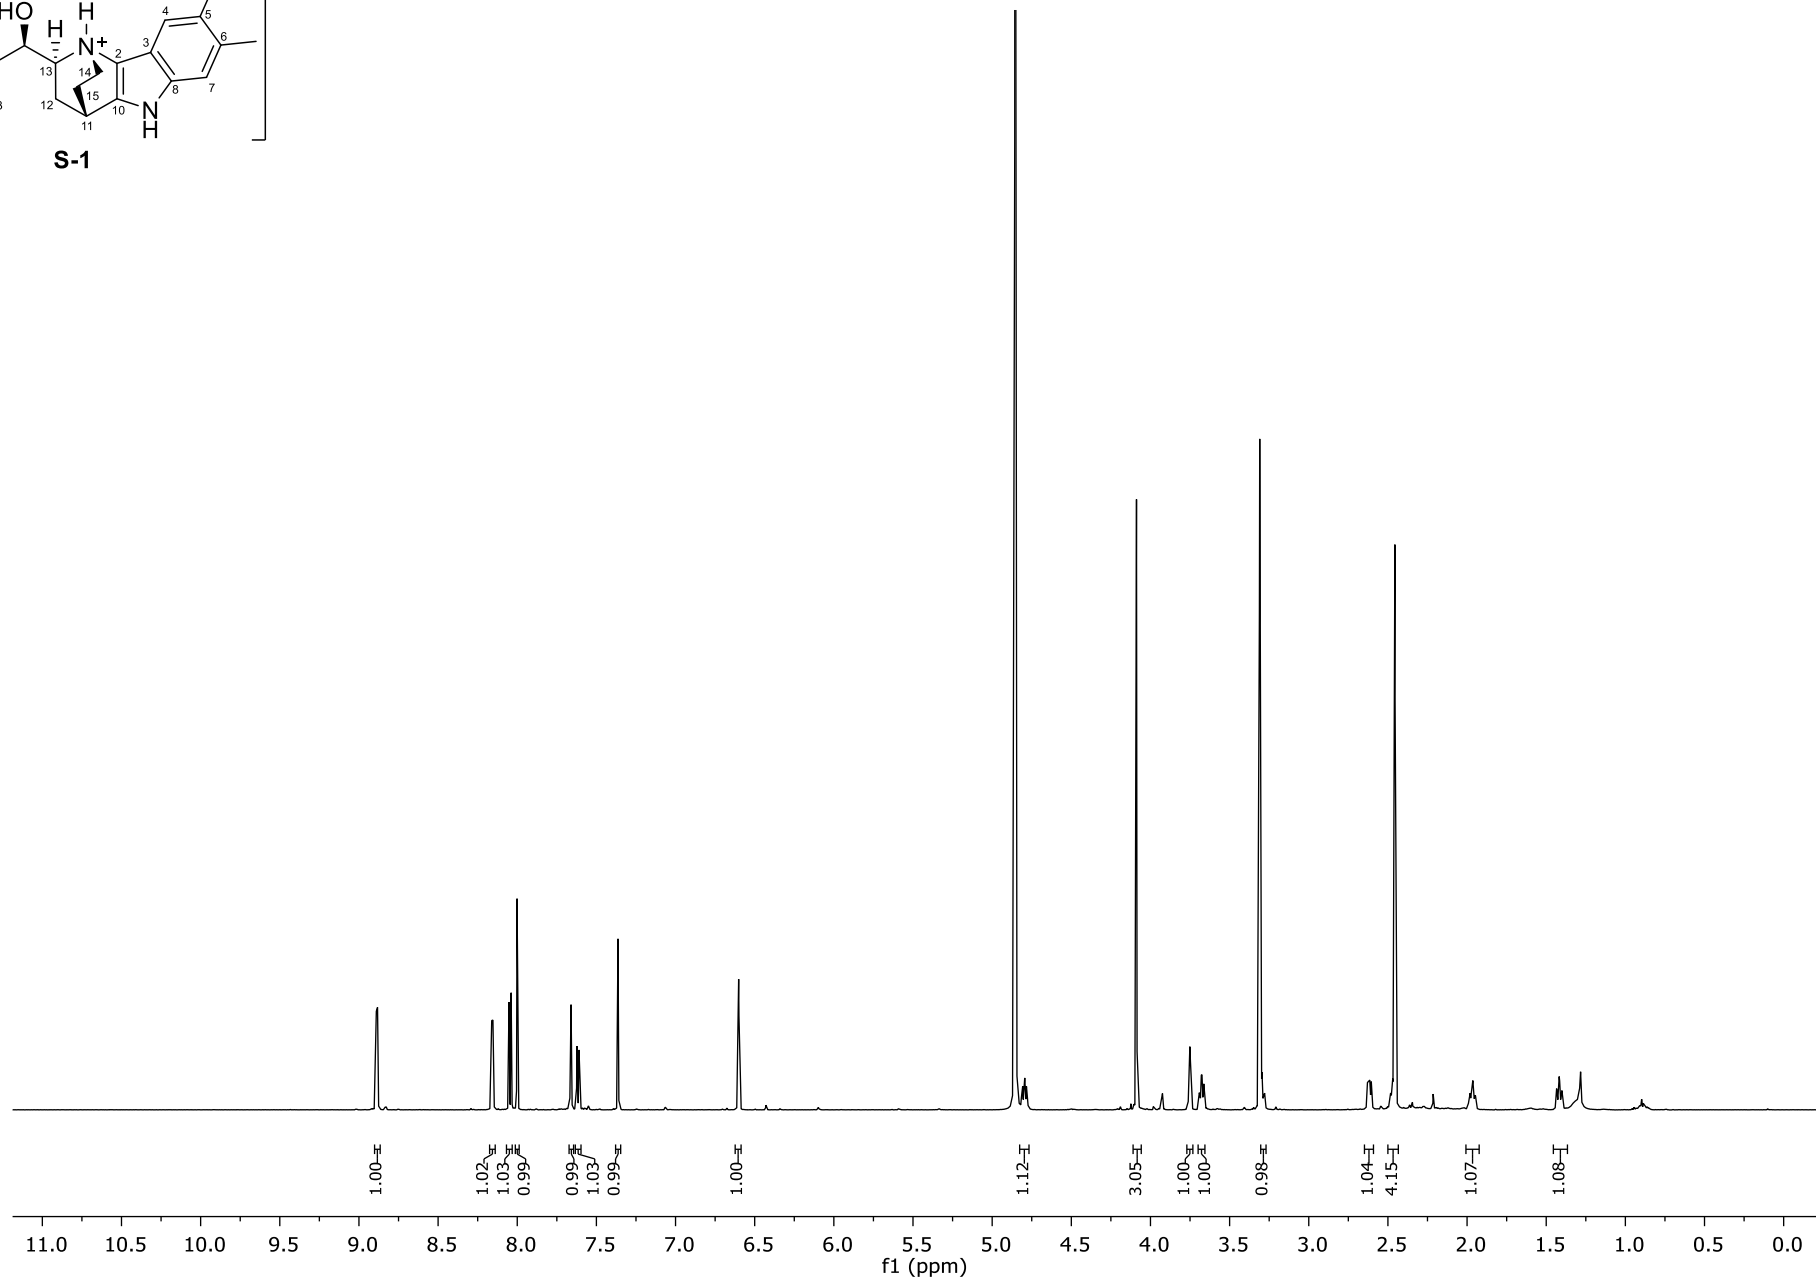

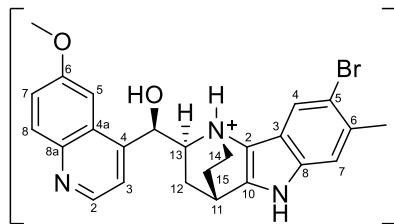

S-1

$\cdot\text{CF}_3\text{CO}_2^-$

163.28  
163.05  
162.84  
162.64  
161.64  
— 154.40

— 144.30  
— 140.95  
— 138.72  
— 135.20  
— 132.26  
— 128.41  
— 127.36  
— 126.96

— 120.37  
— 118.47  
— 118.28  
— 117.13  
— 114.91

— 102.30

287

— 69.85  
— 68.01

— 57.25

— 51.28

— 28.88  
— 27.09  
— 24.83  
— 23.55

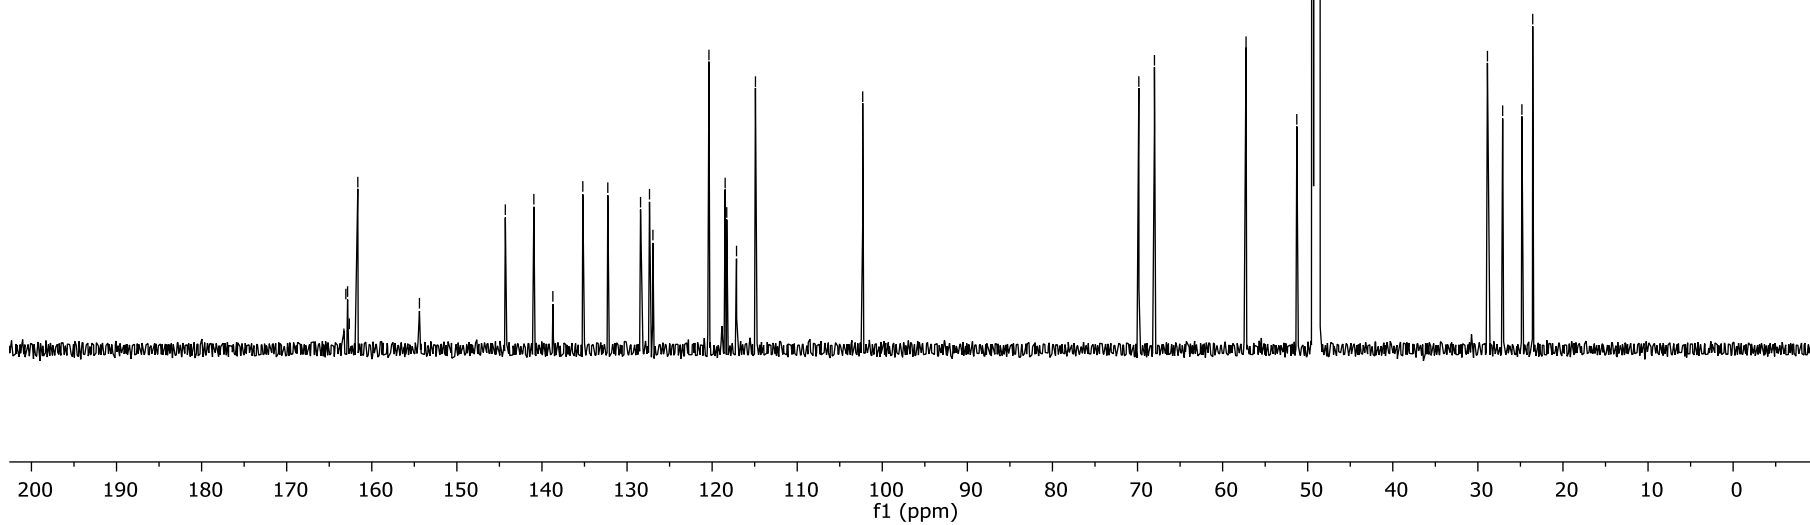



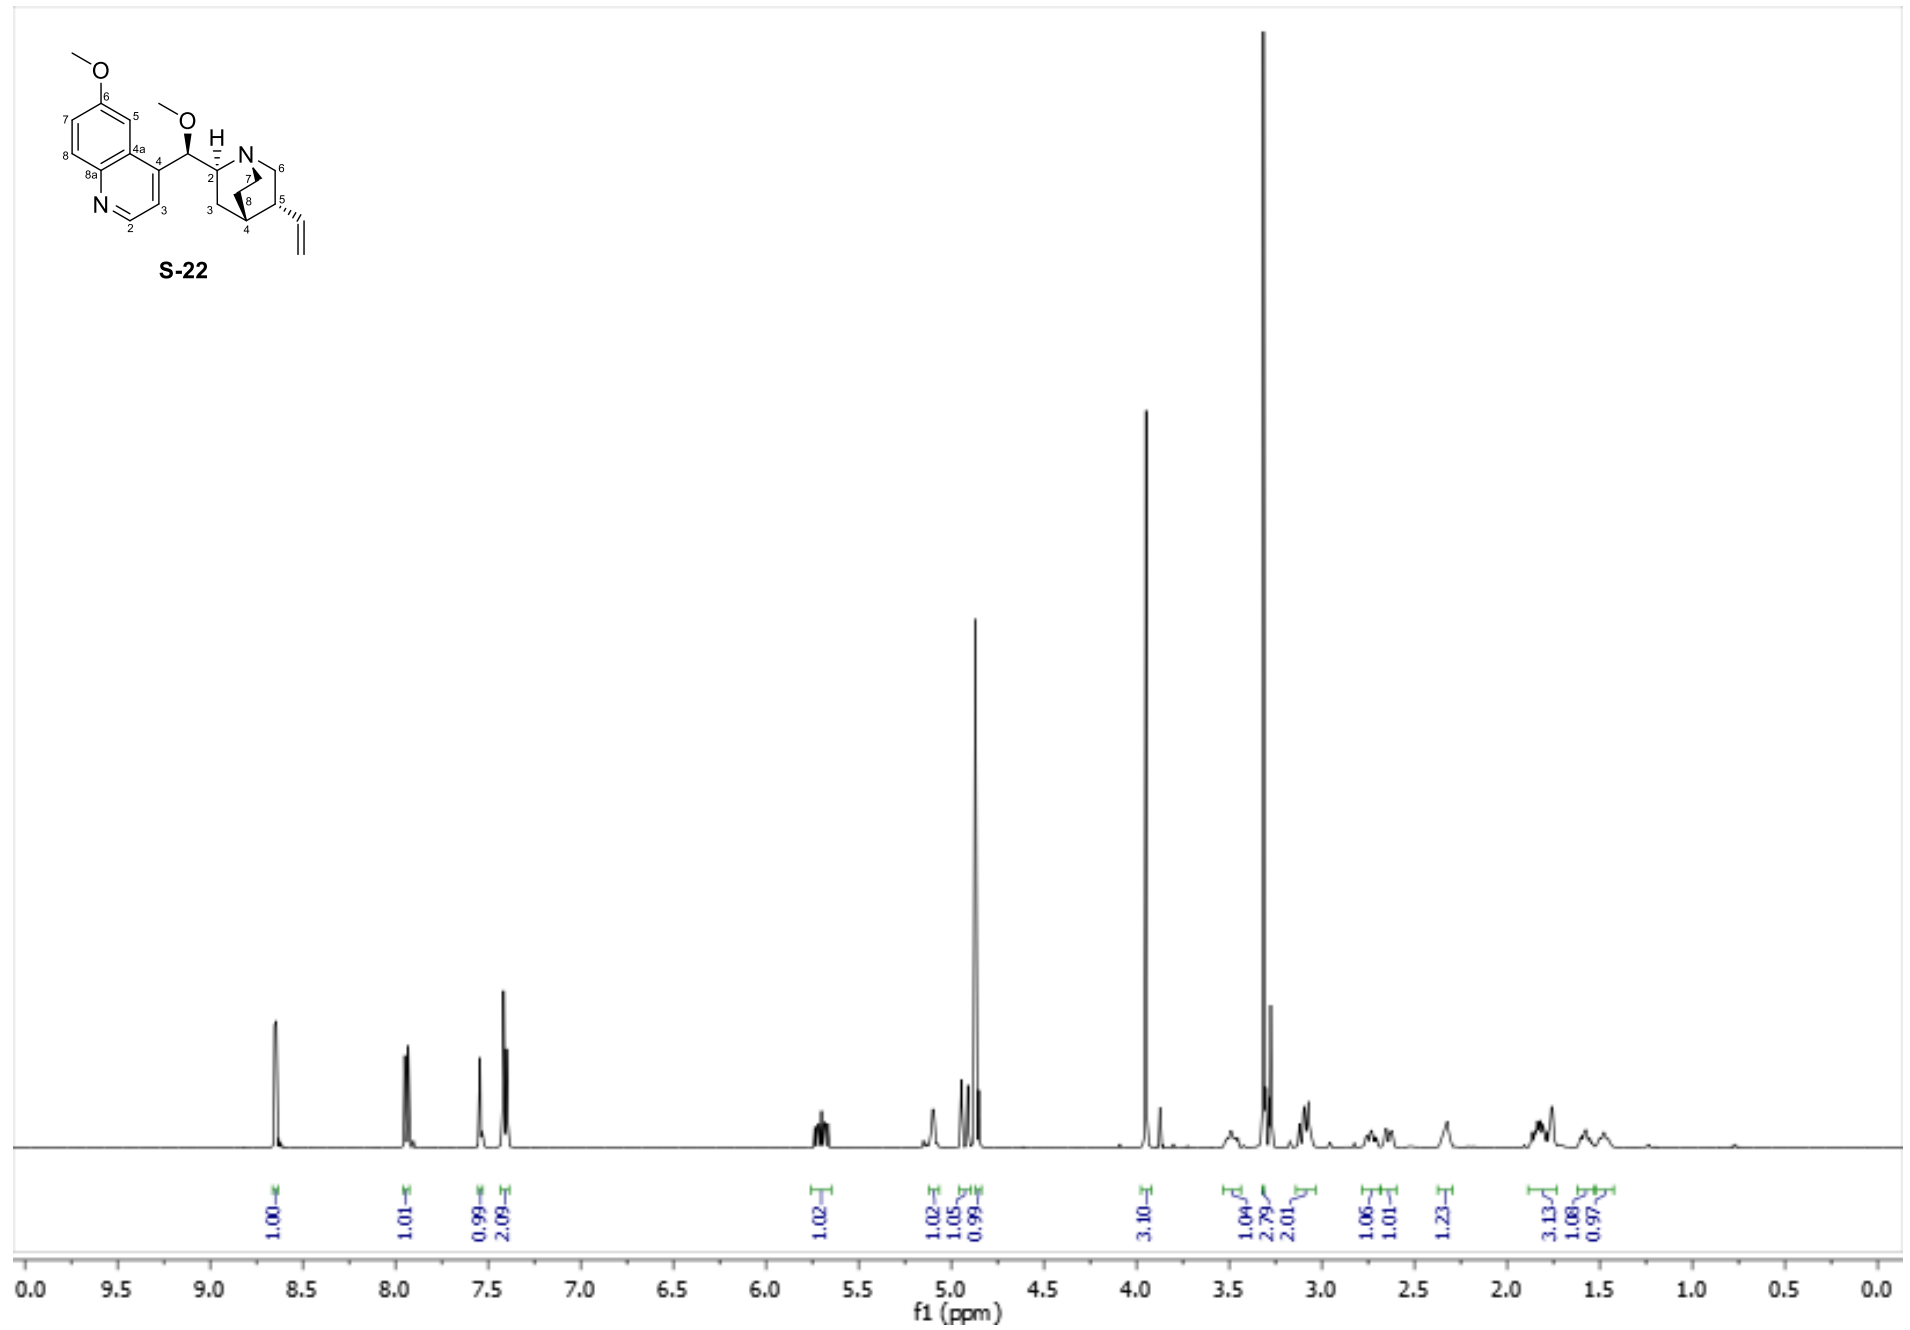

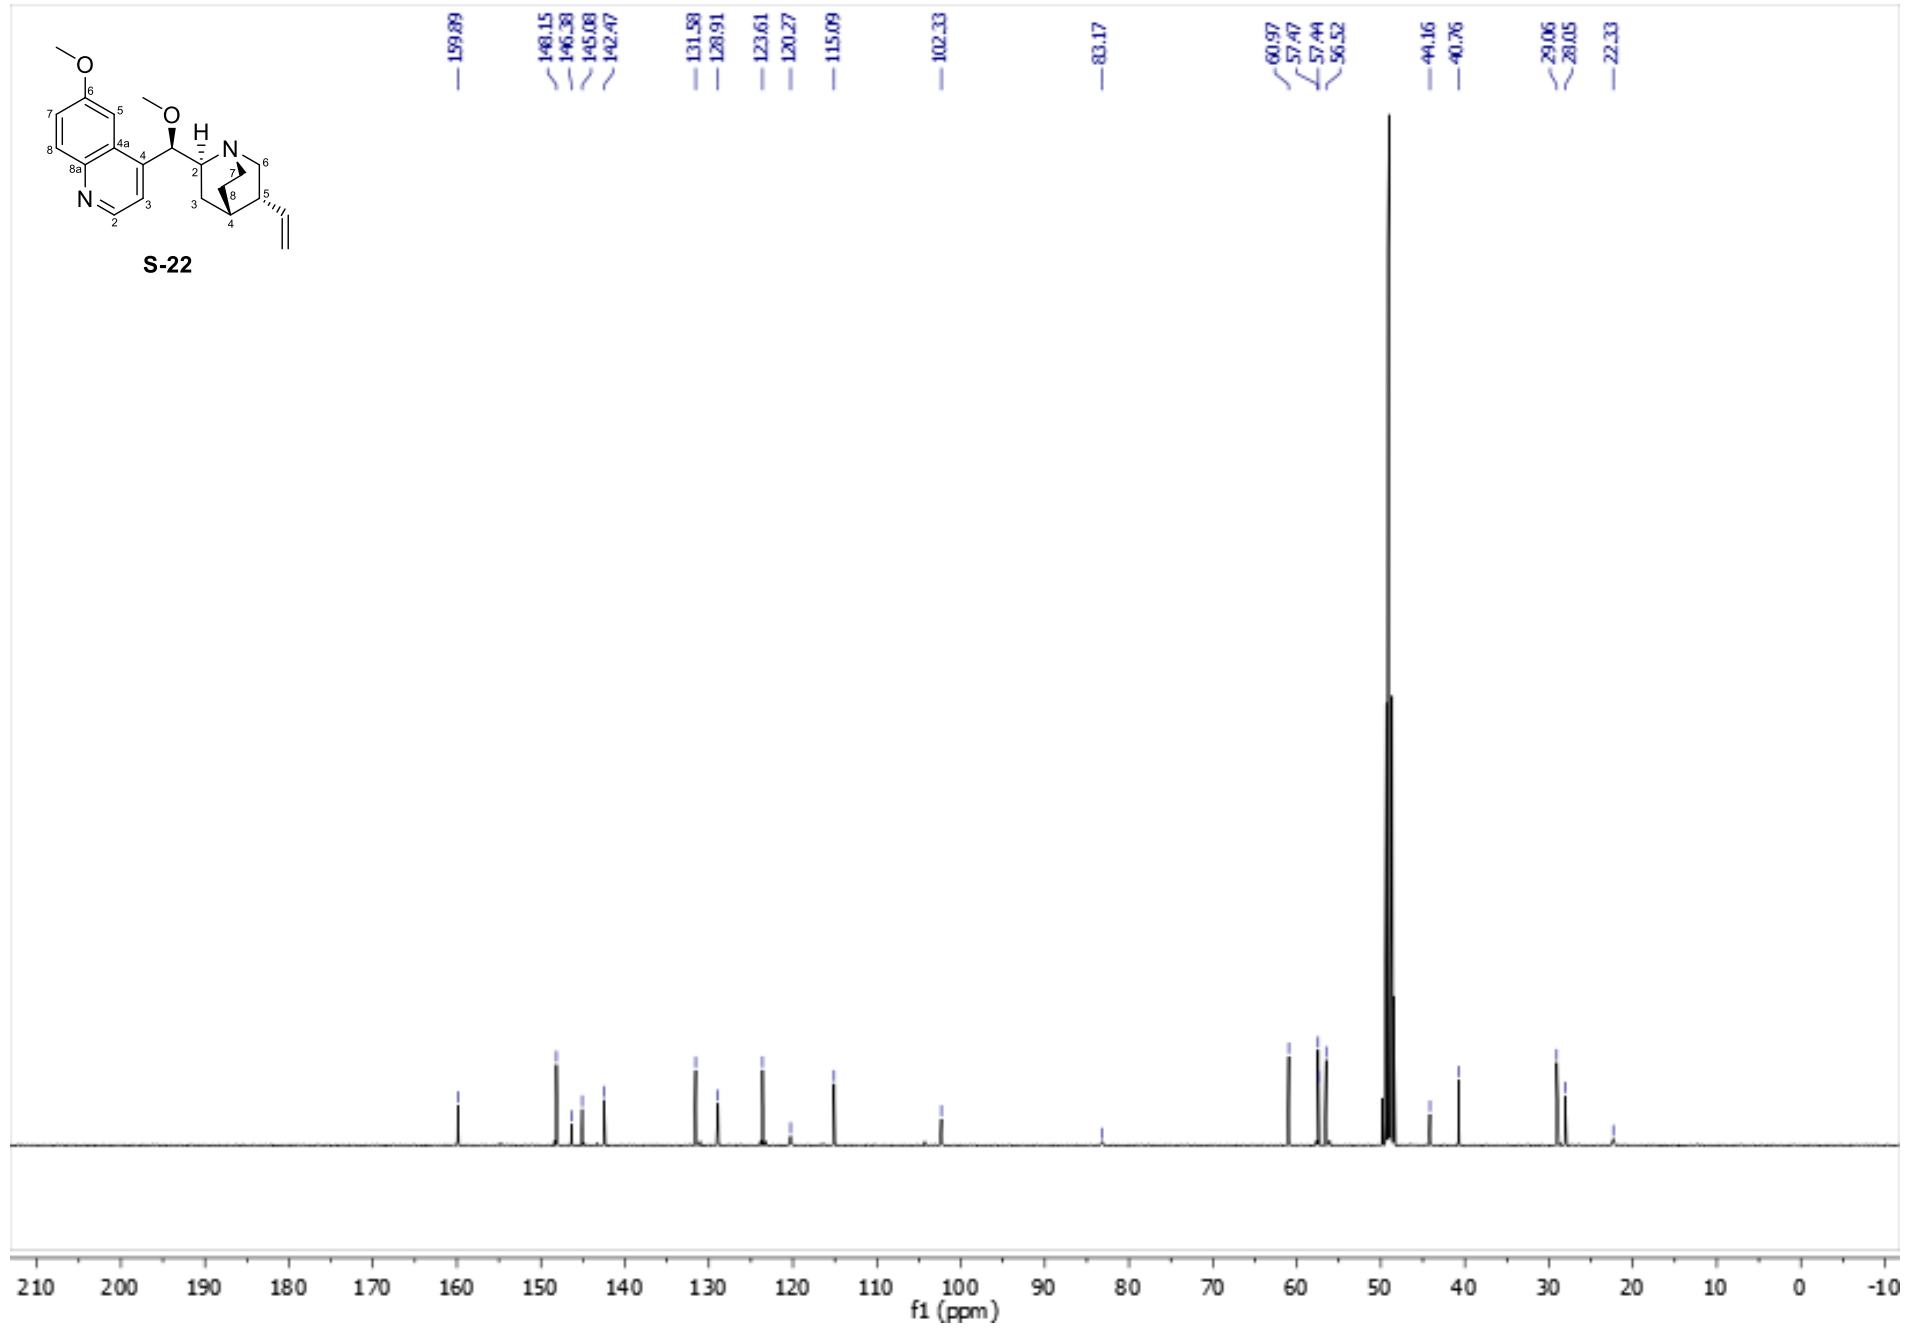

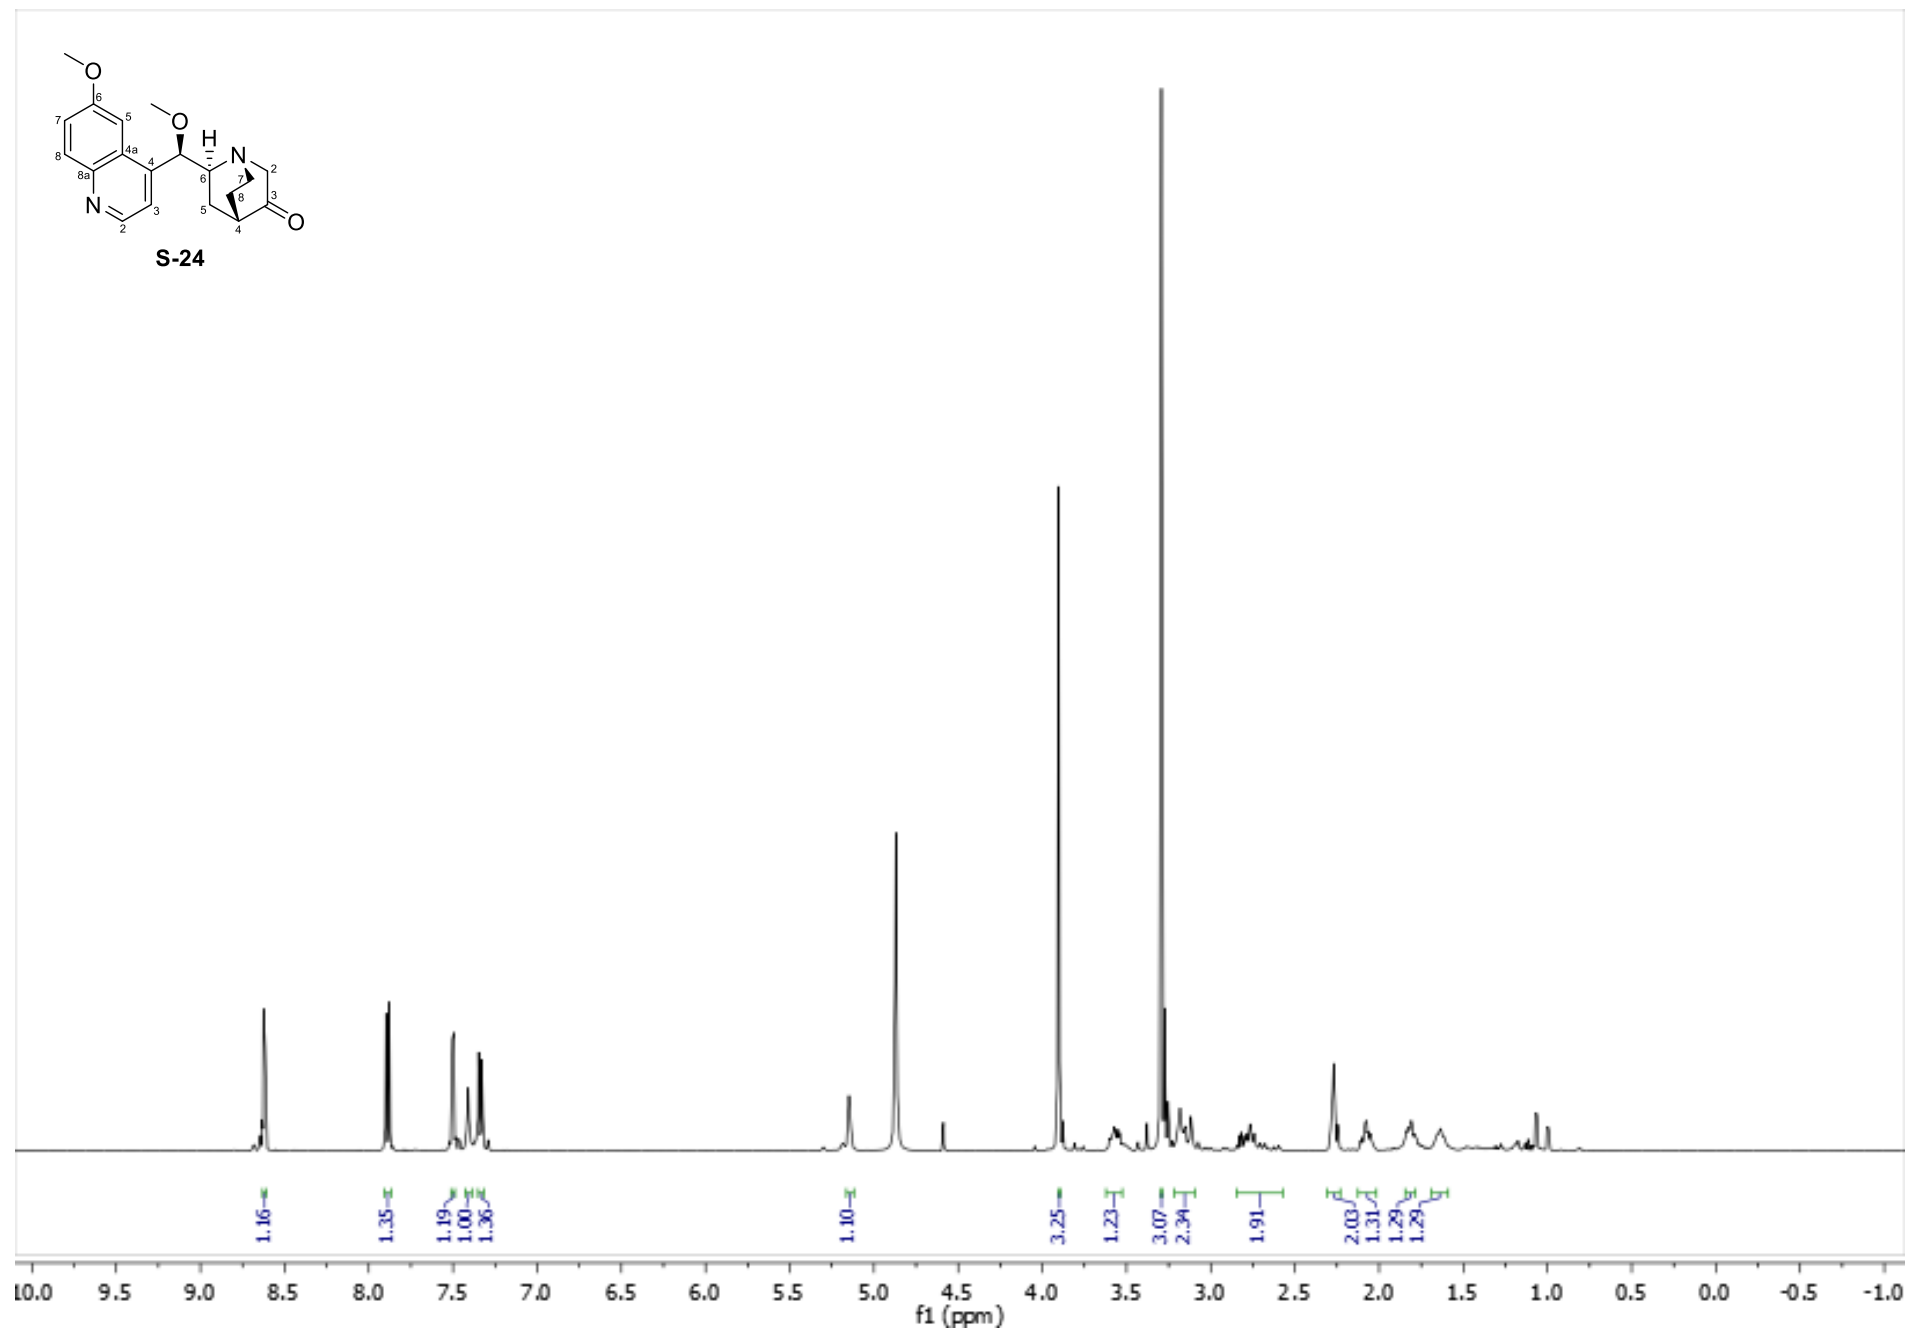

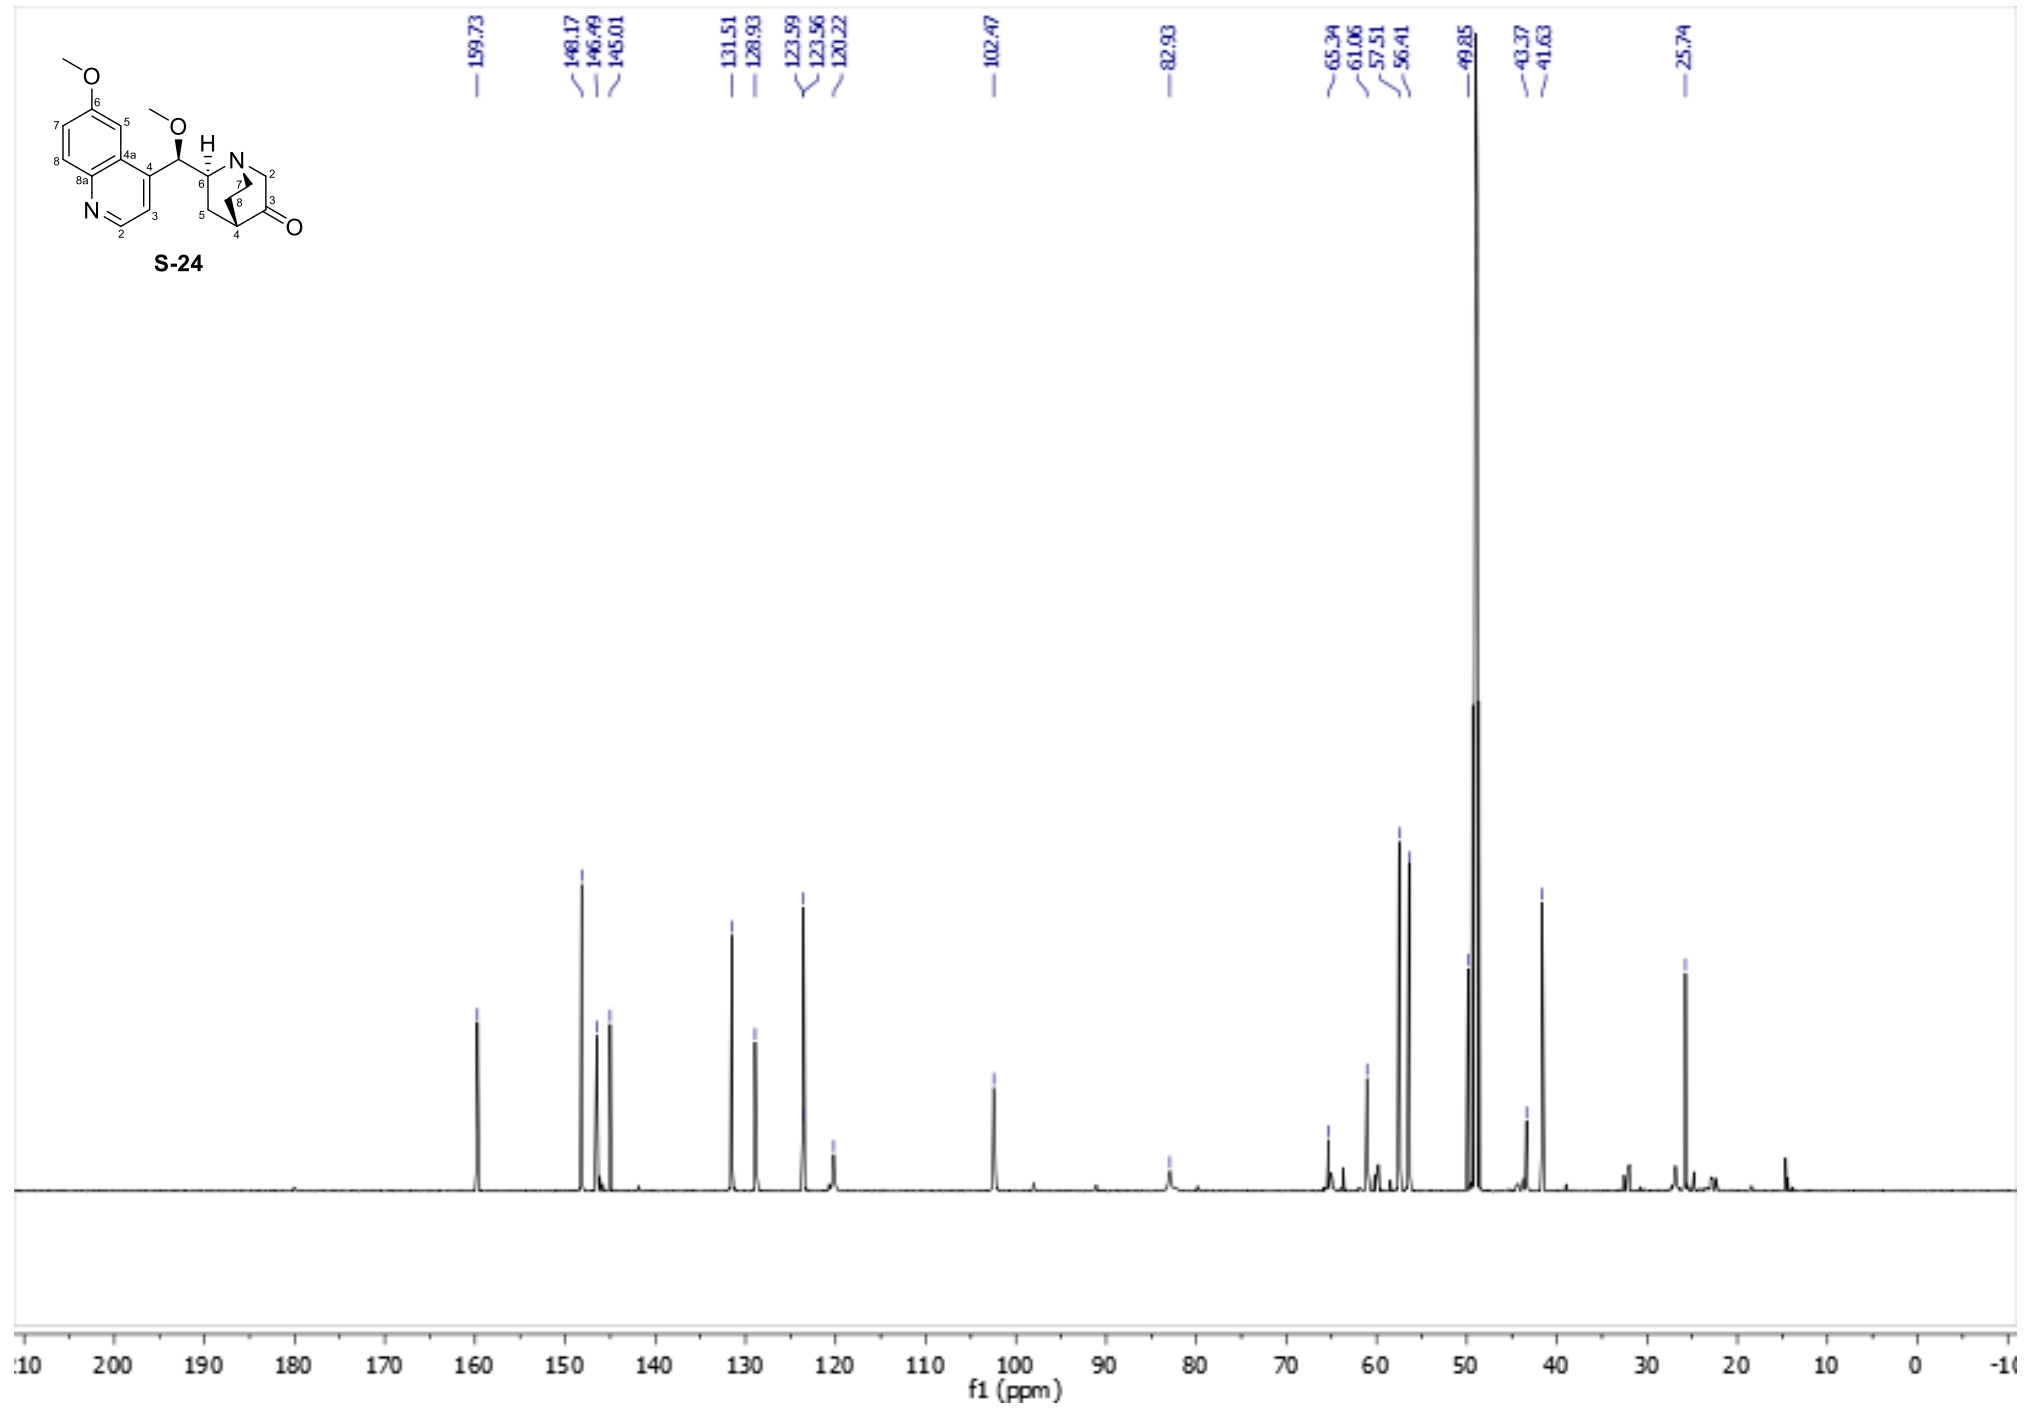

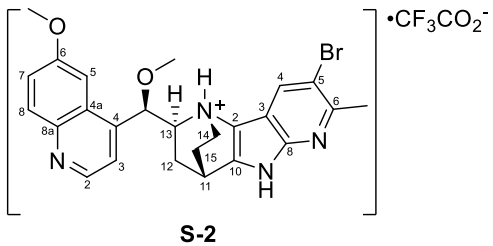

292

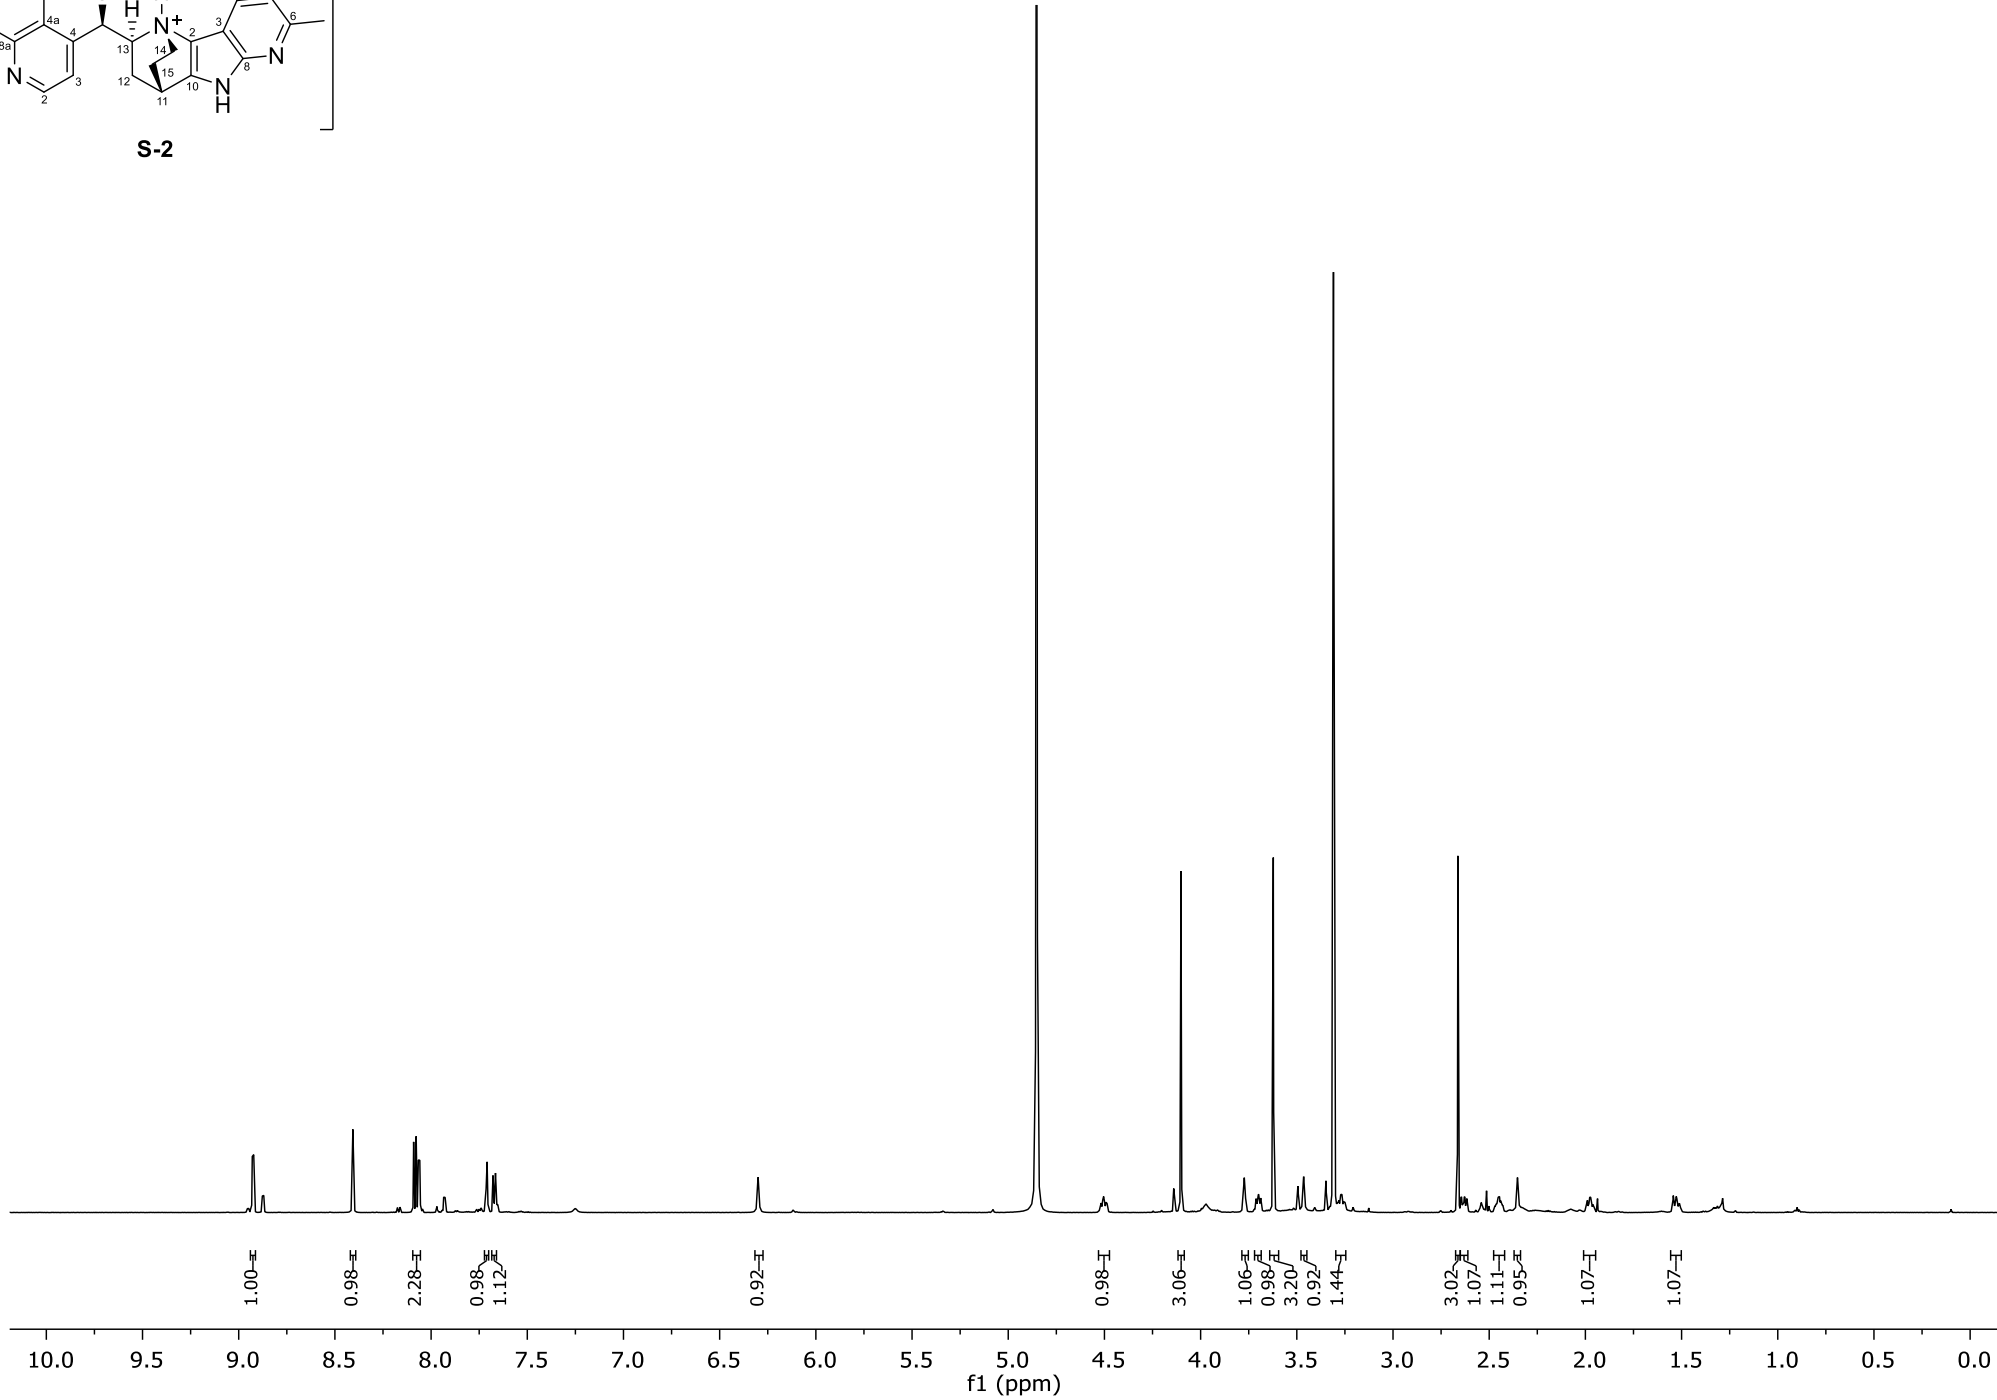

162.54  
162.35  
162.14  
161.92  
161.88

— 151.14

~ 145.66

~ 144.08

~ 141.93

~ 129.64

~ 127.84

~ 126.70

— 120.40

~ 114.83

~ 111.70

~ 109.06

— 102.55

— 93.59

— 78.14

— 68.65

~ 58.09

~ 57.47

~ 55.46

~ 51.13

~ 49.53

~ 48.63

~ 30.51

~ 28.64

~ 27.14

~ 25.08

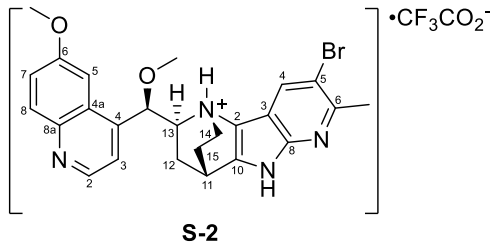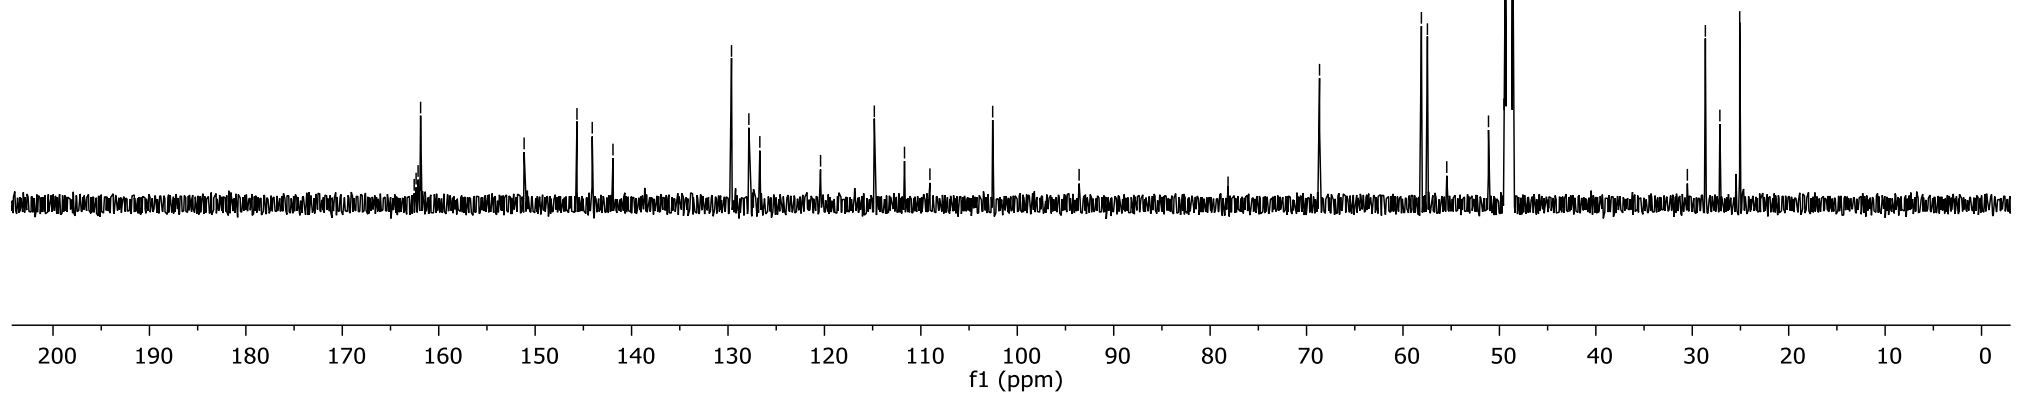

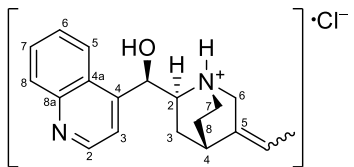

**S-25**

294

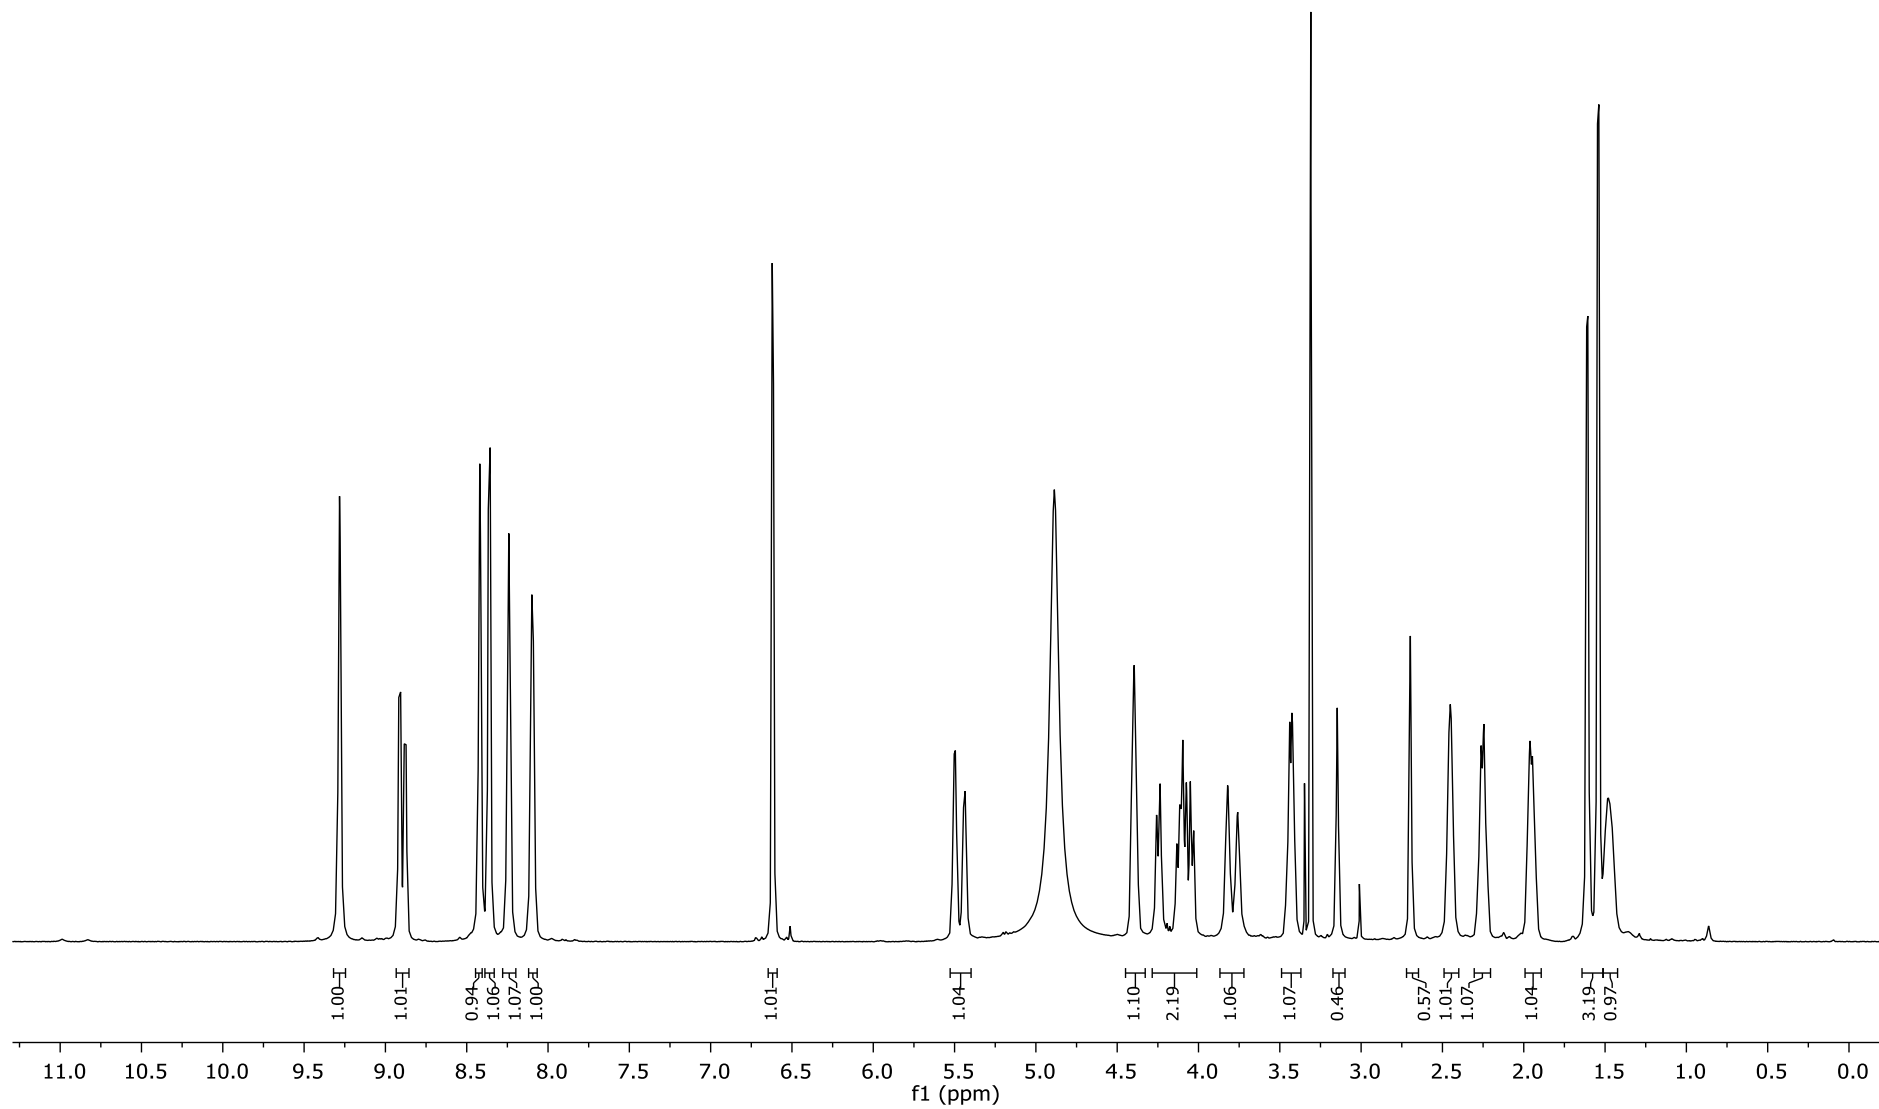

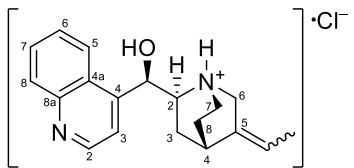

**S-25**

295

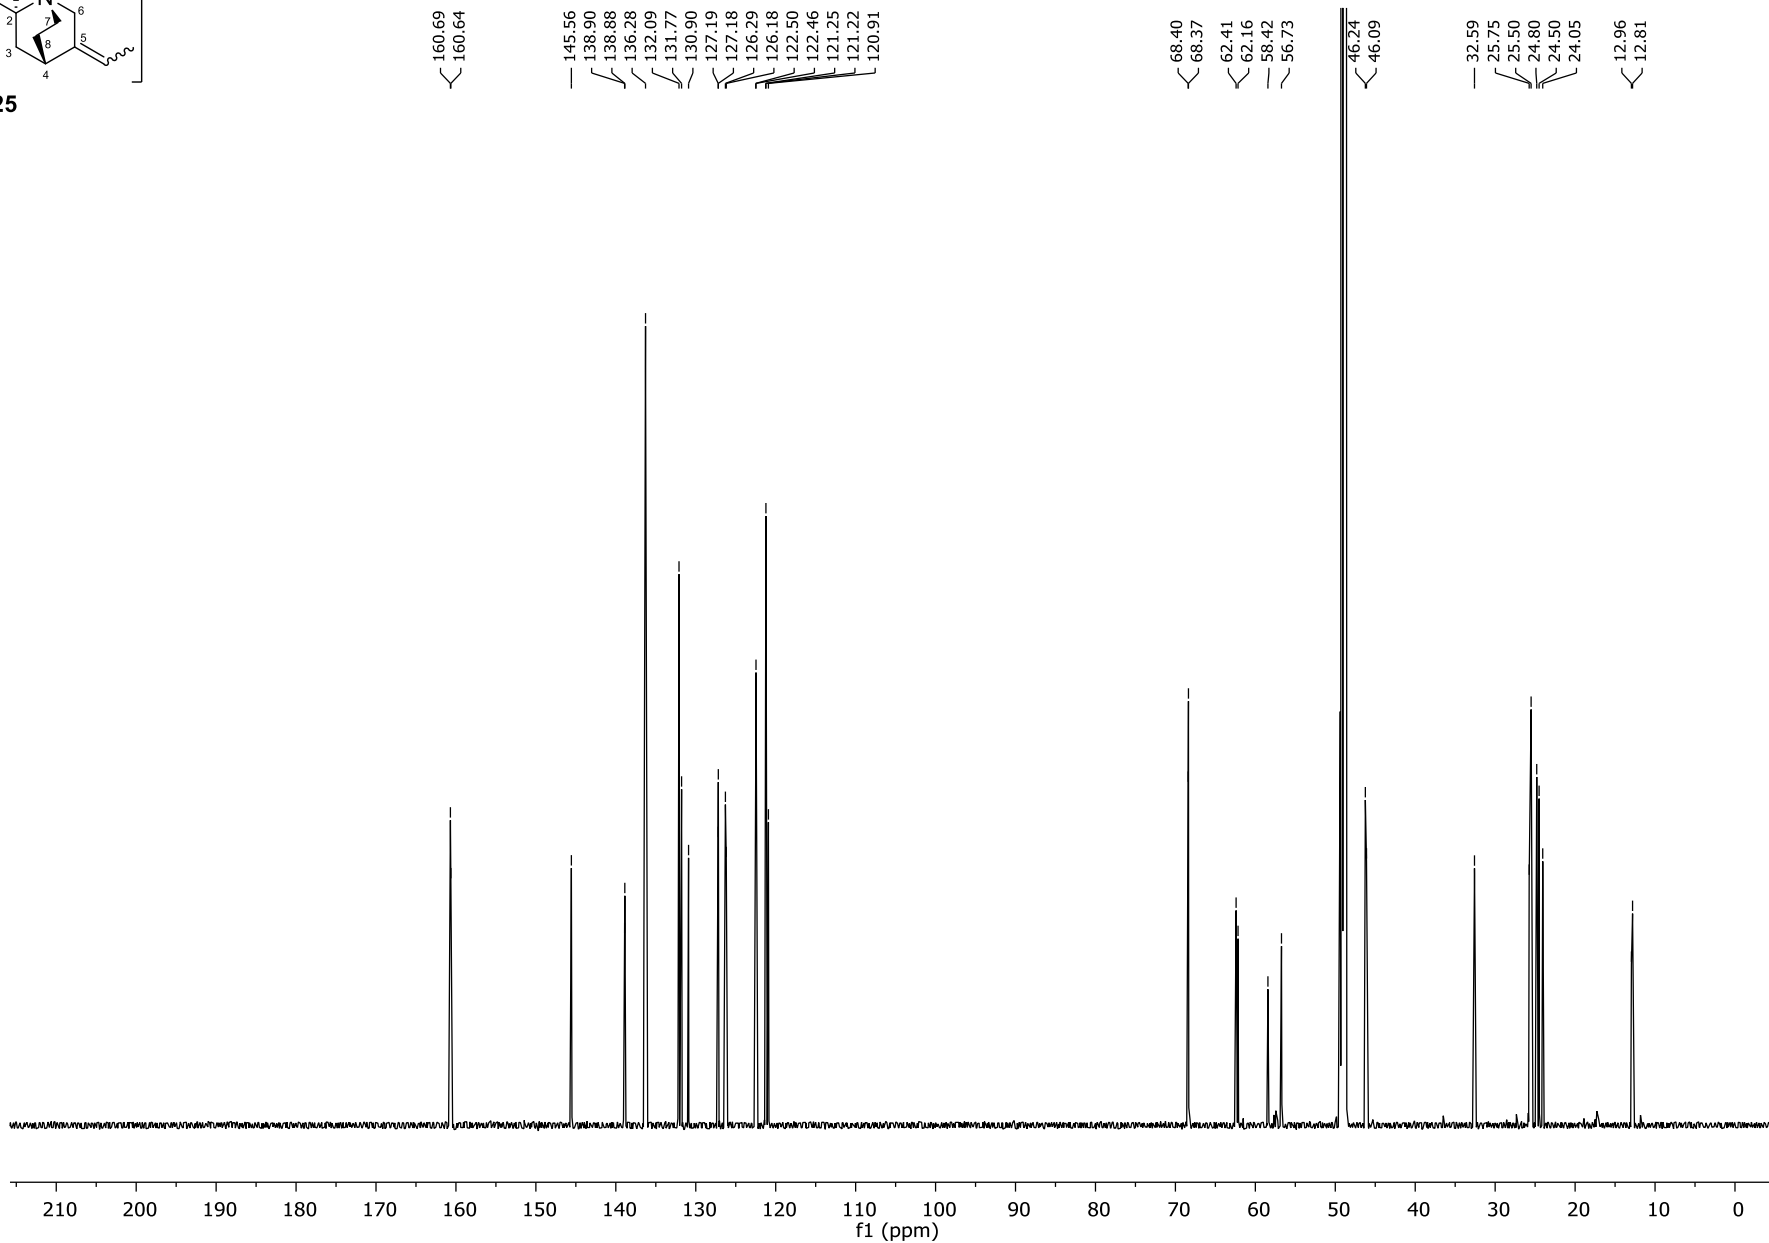



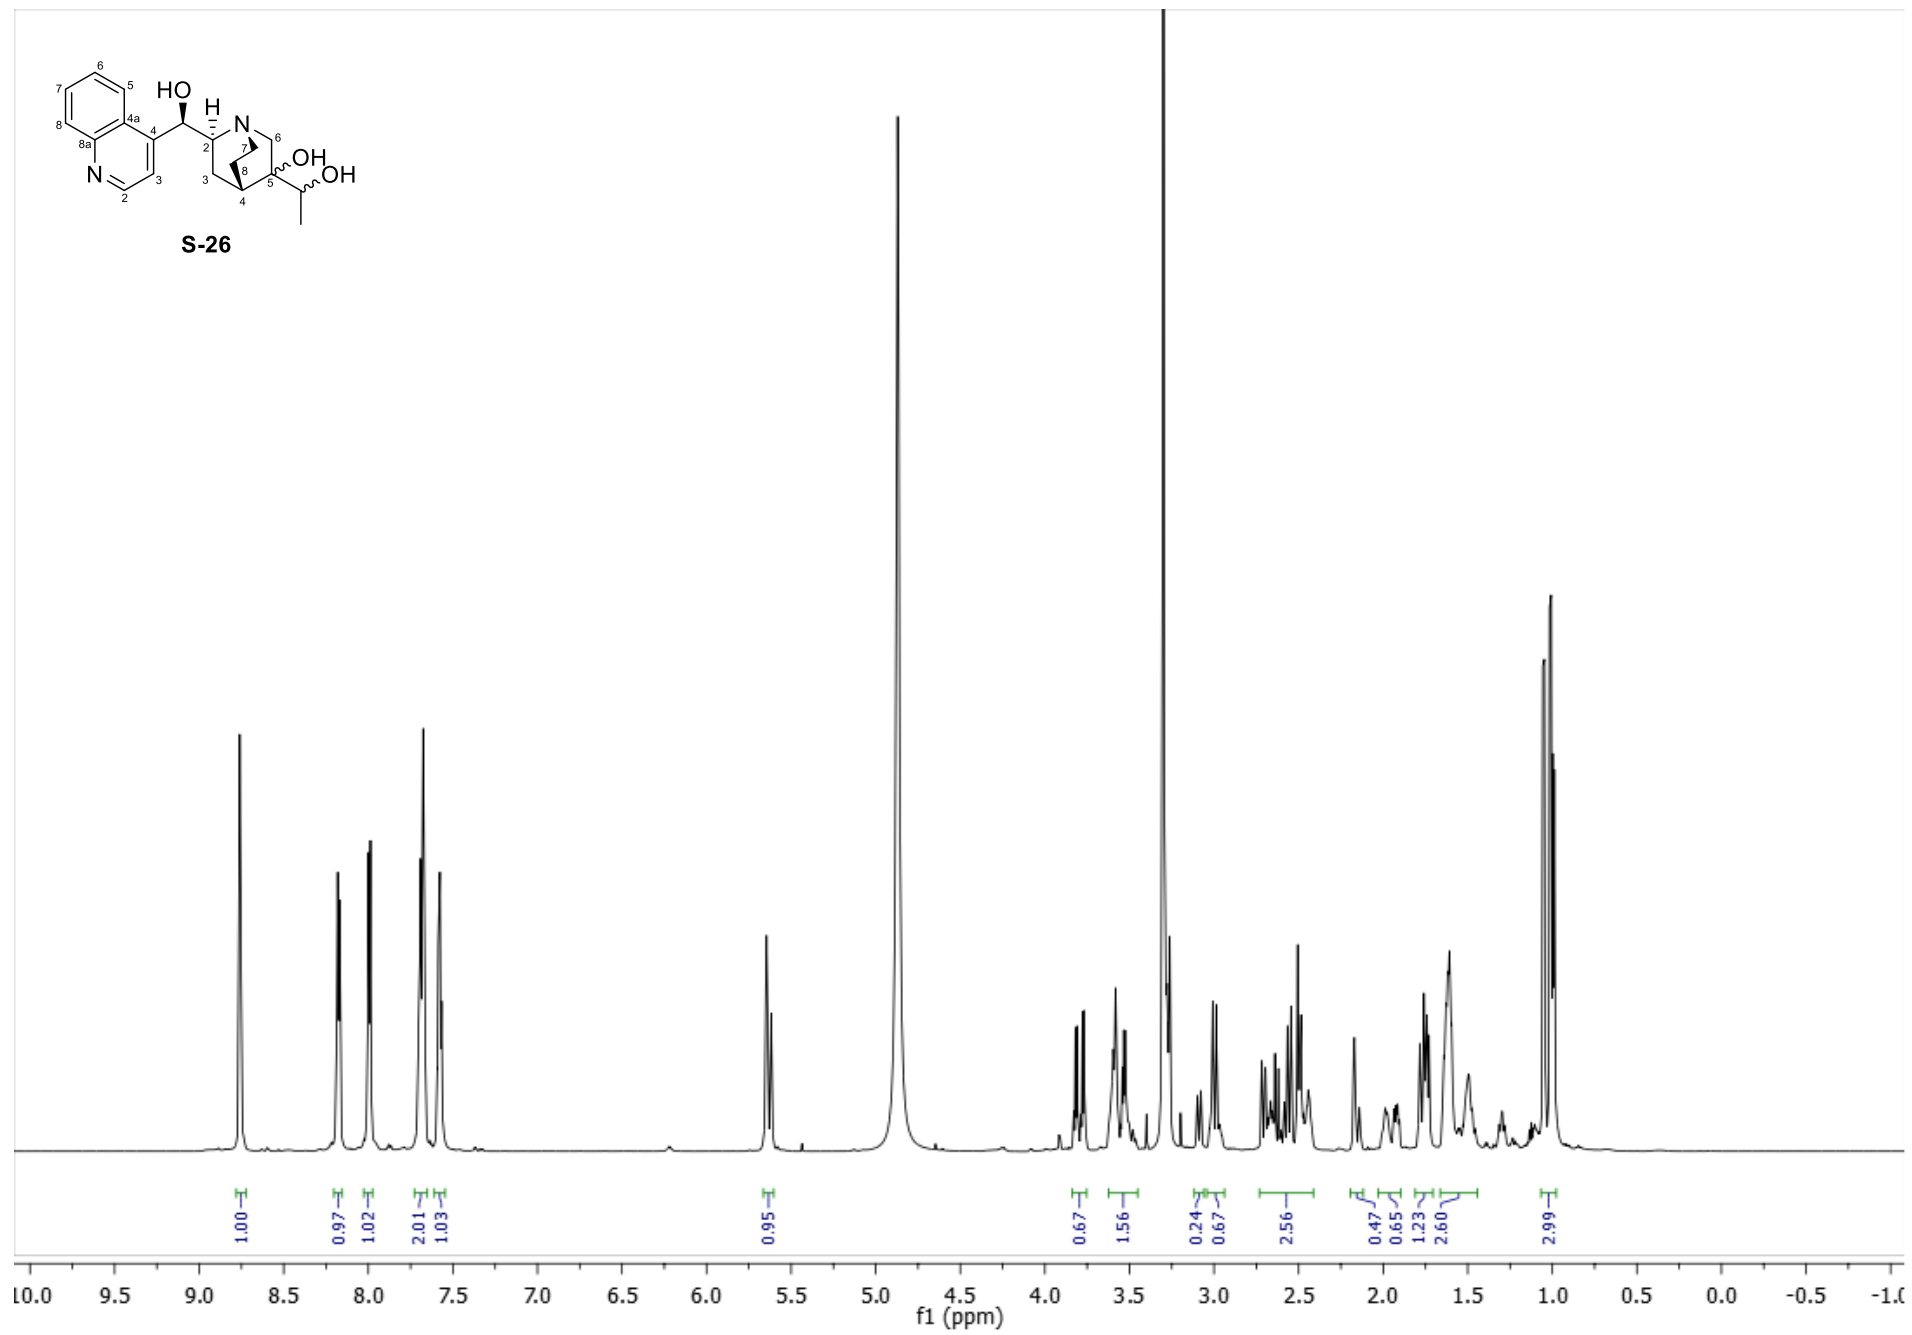

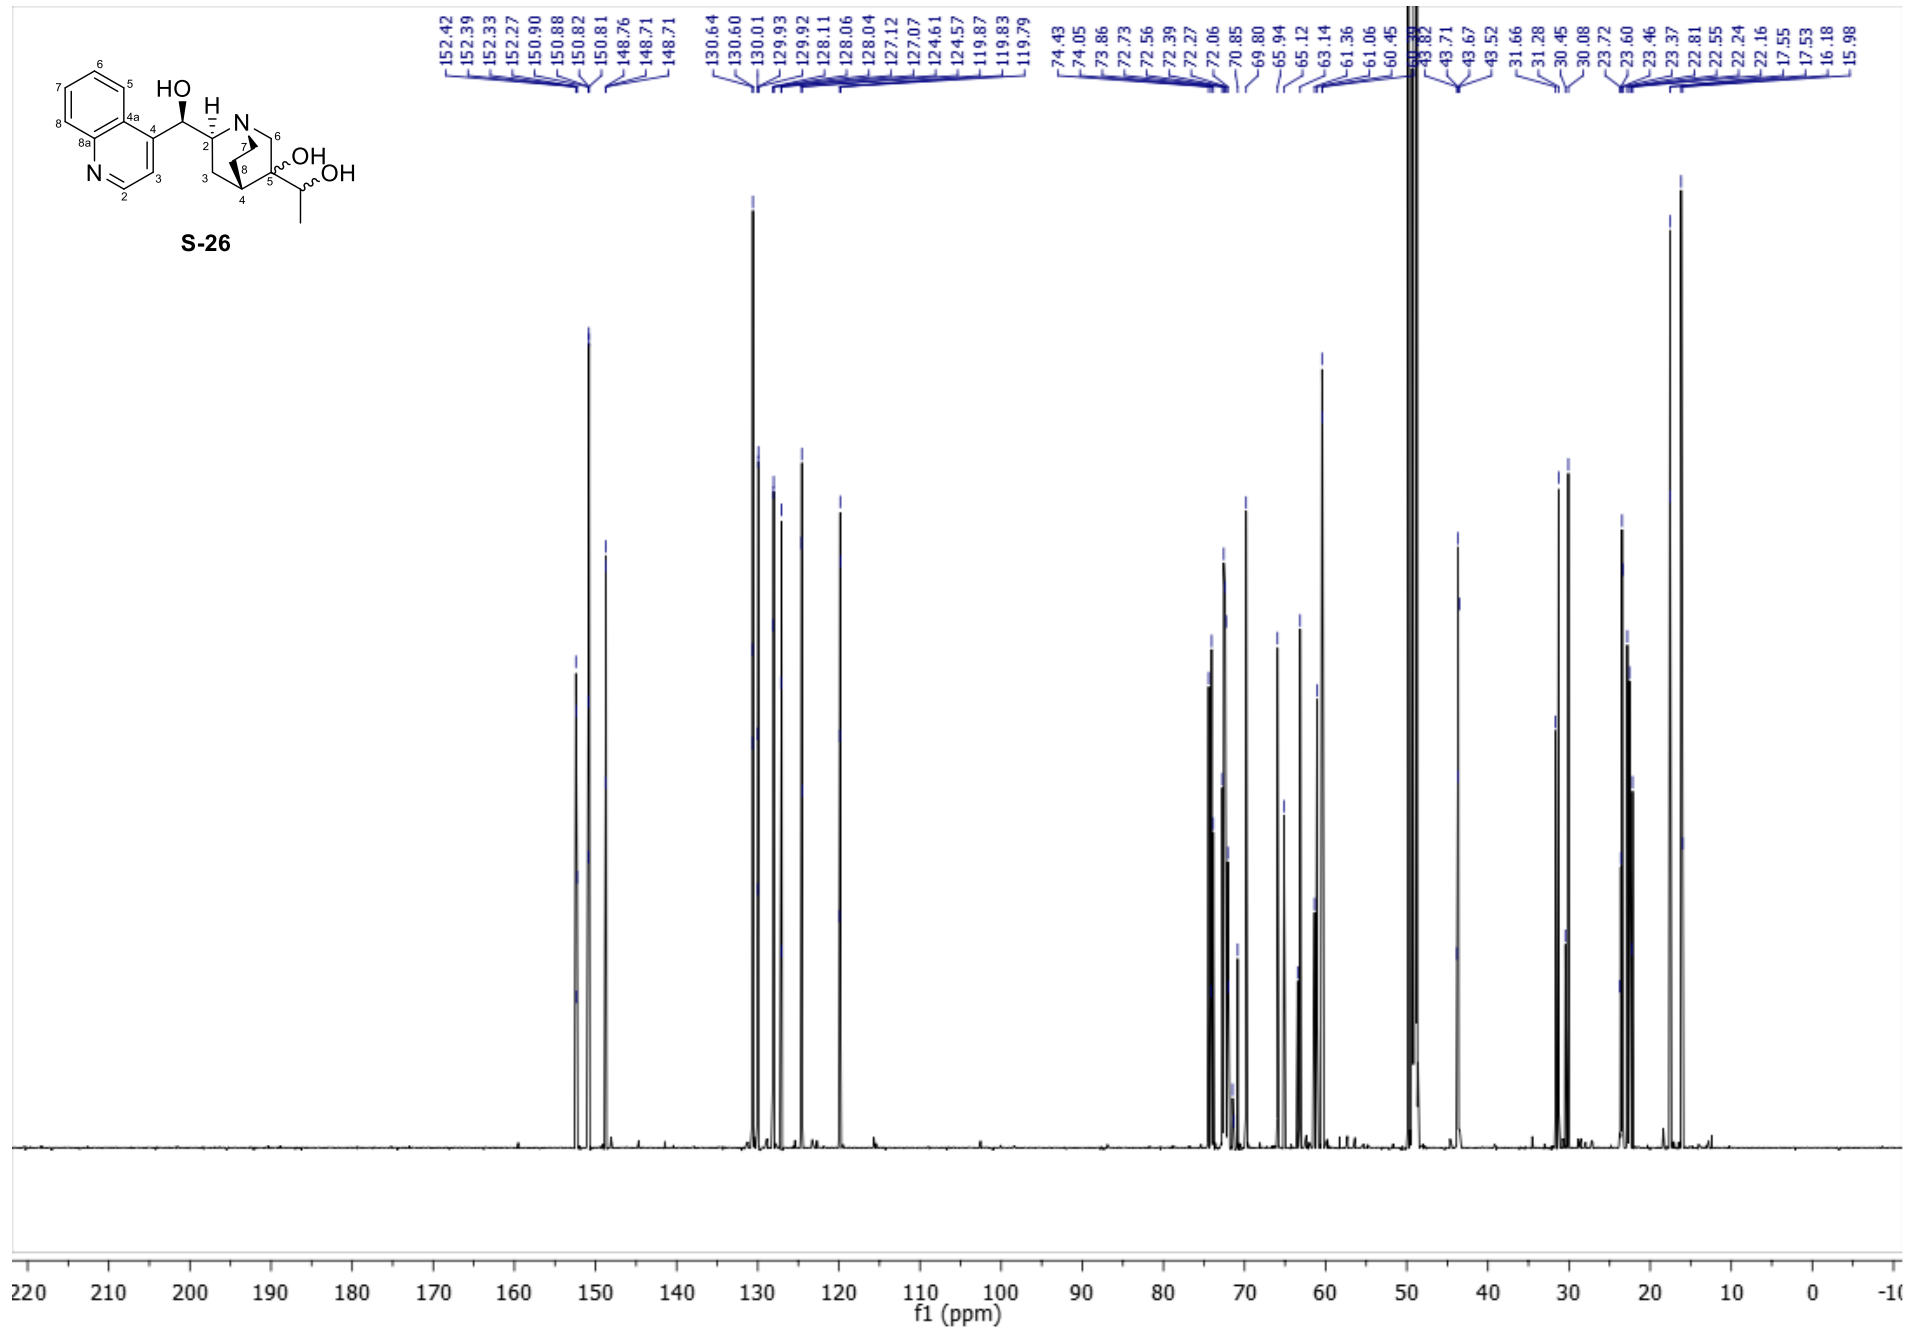

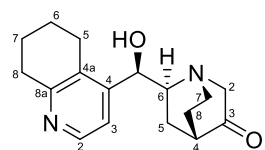**S-27**

*spectrum complicated by deuterium exchange at 2-C*

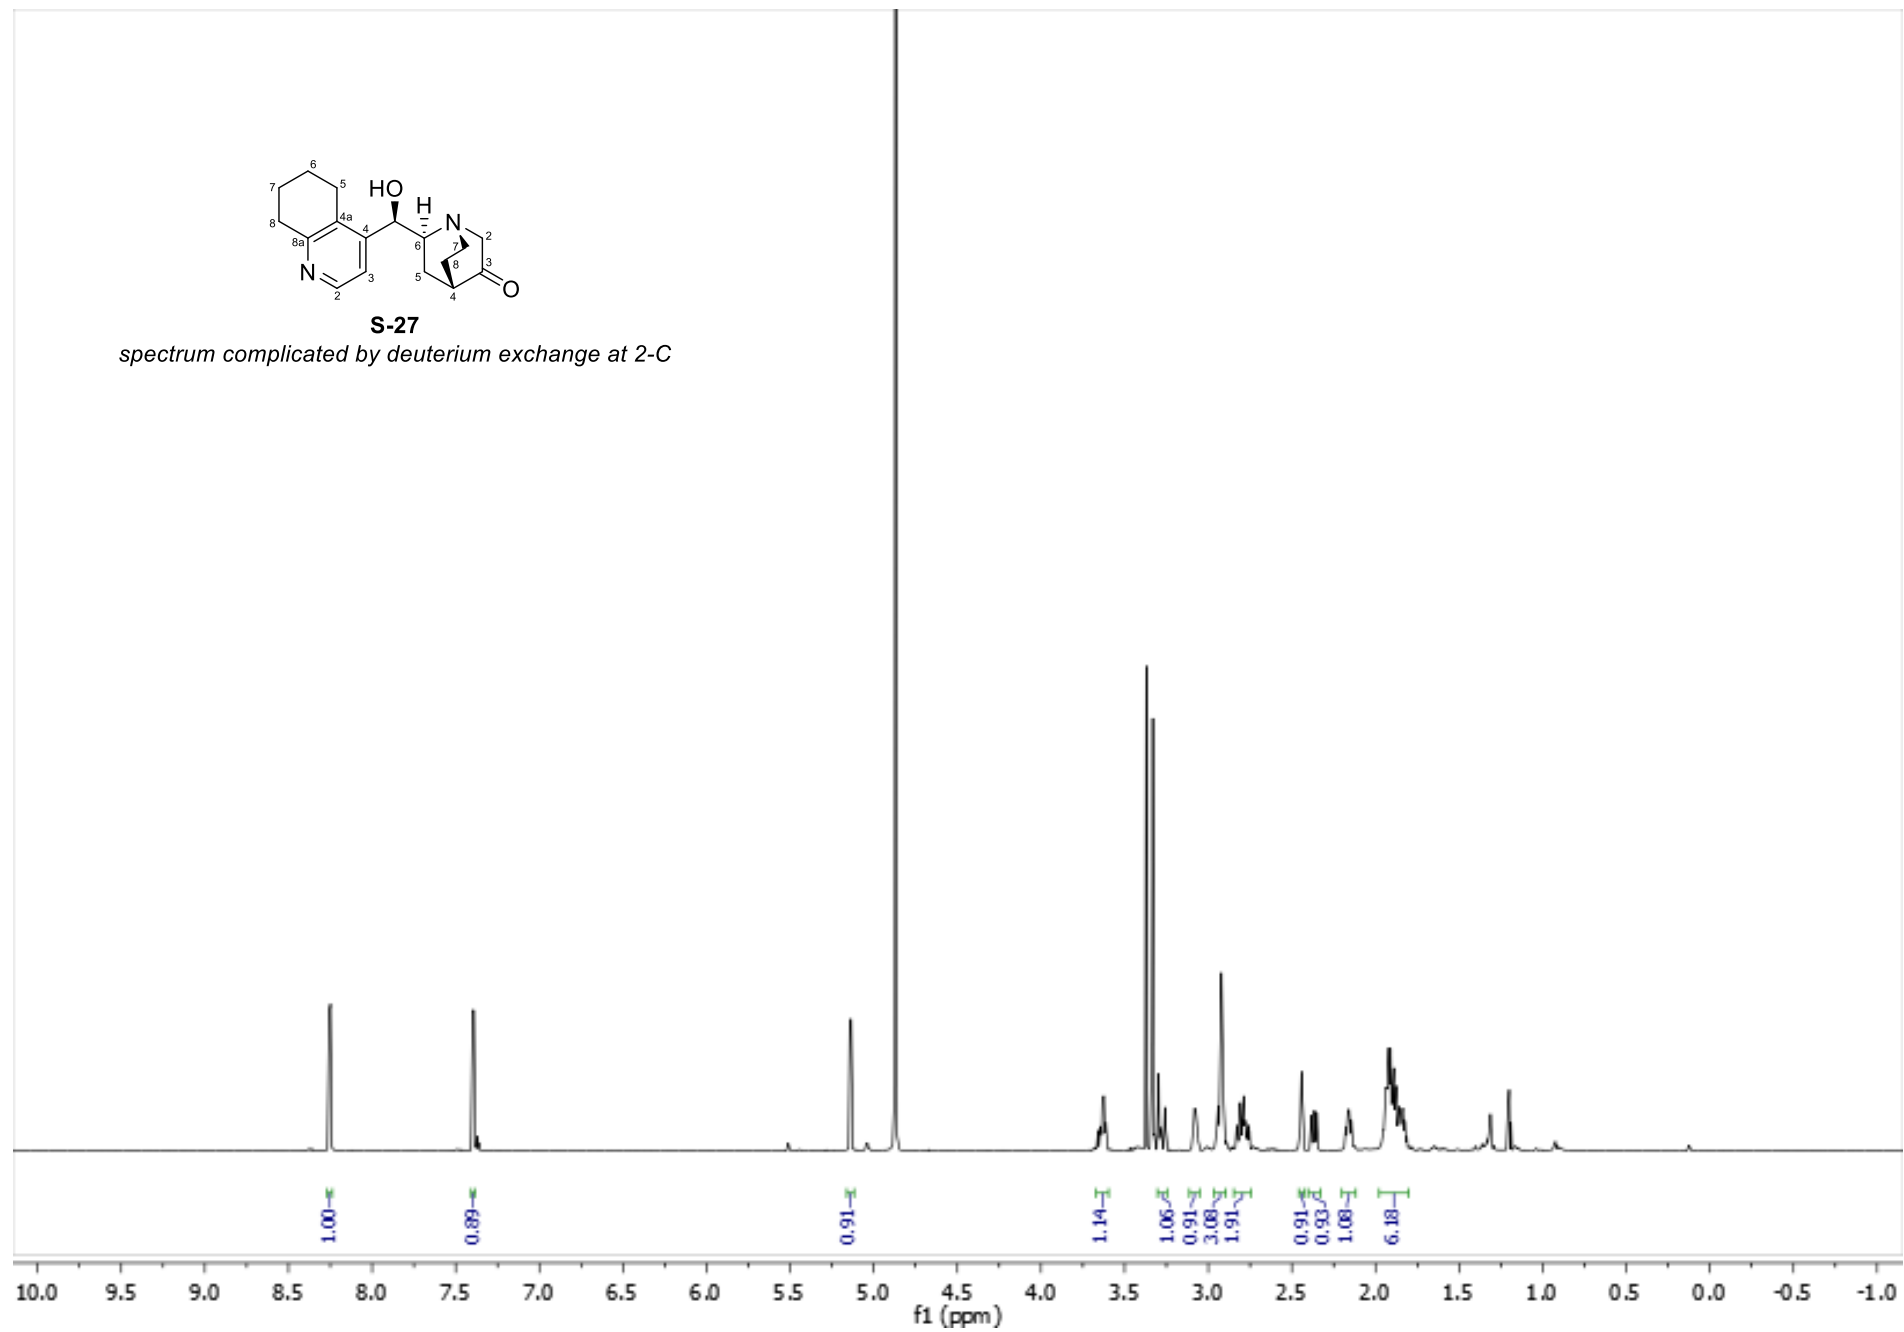

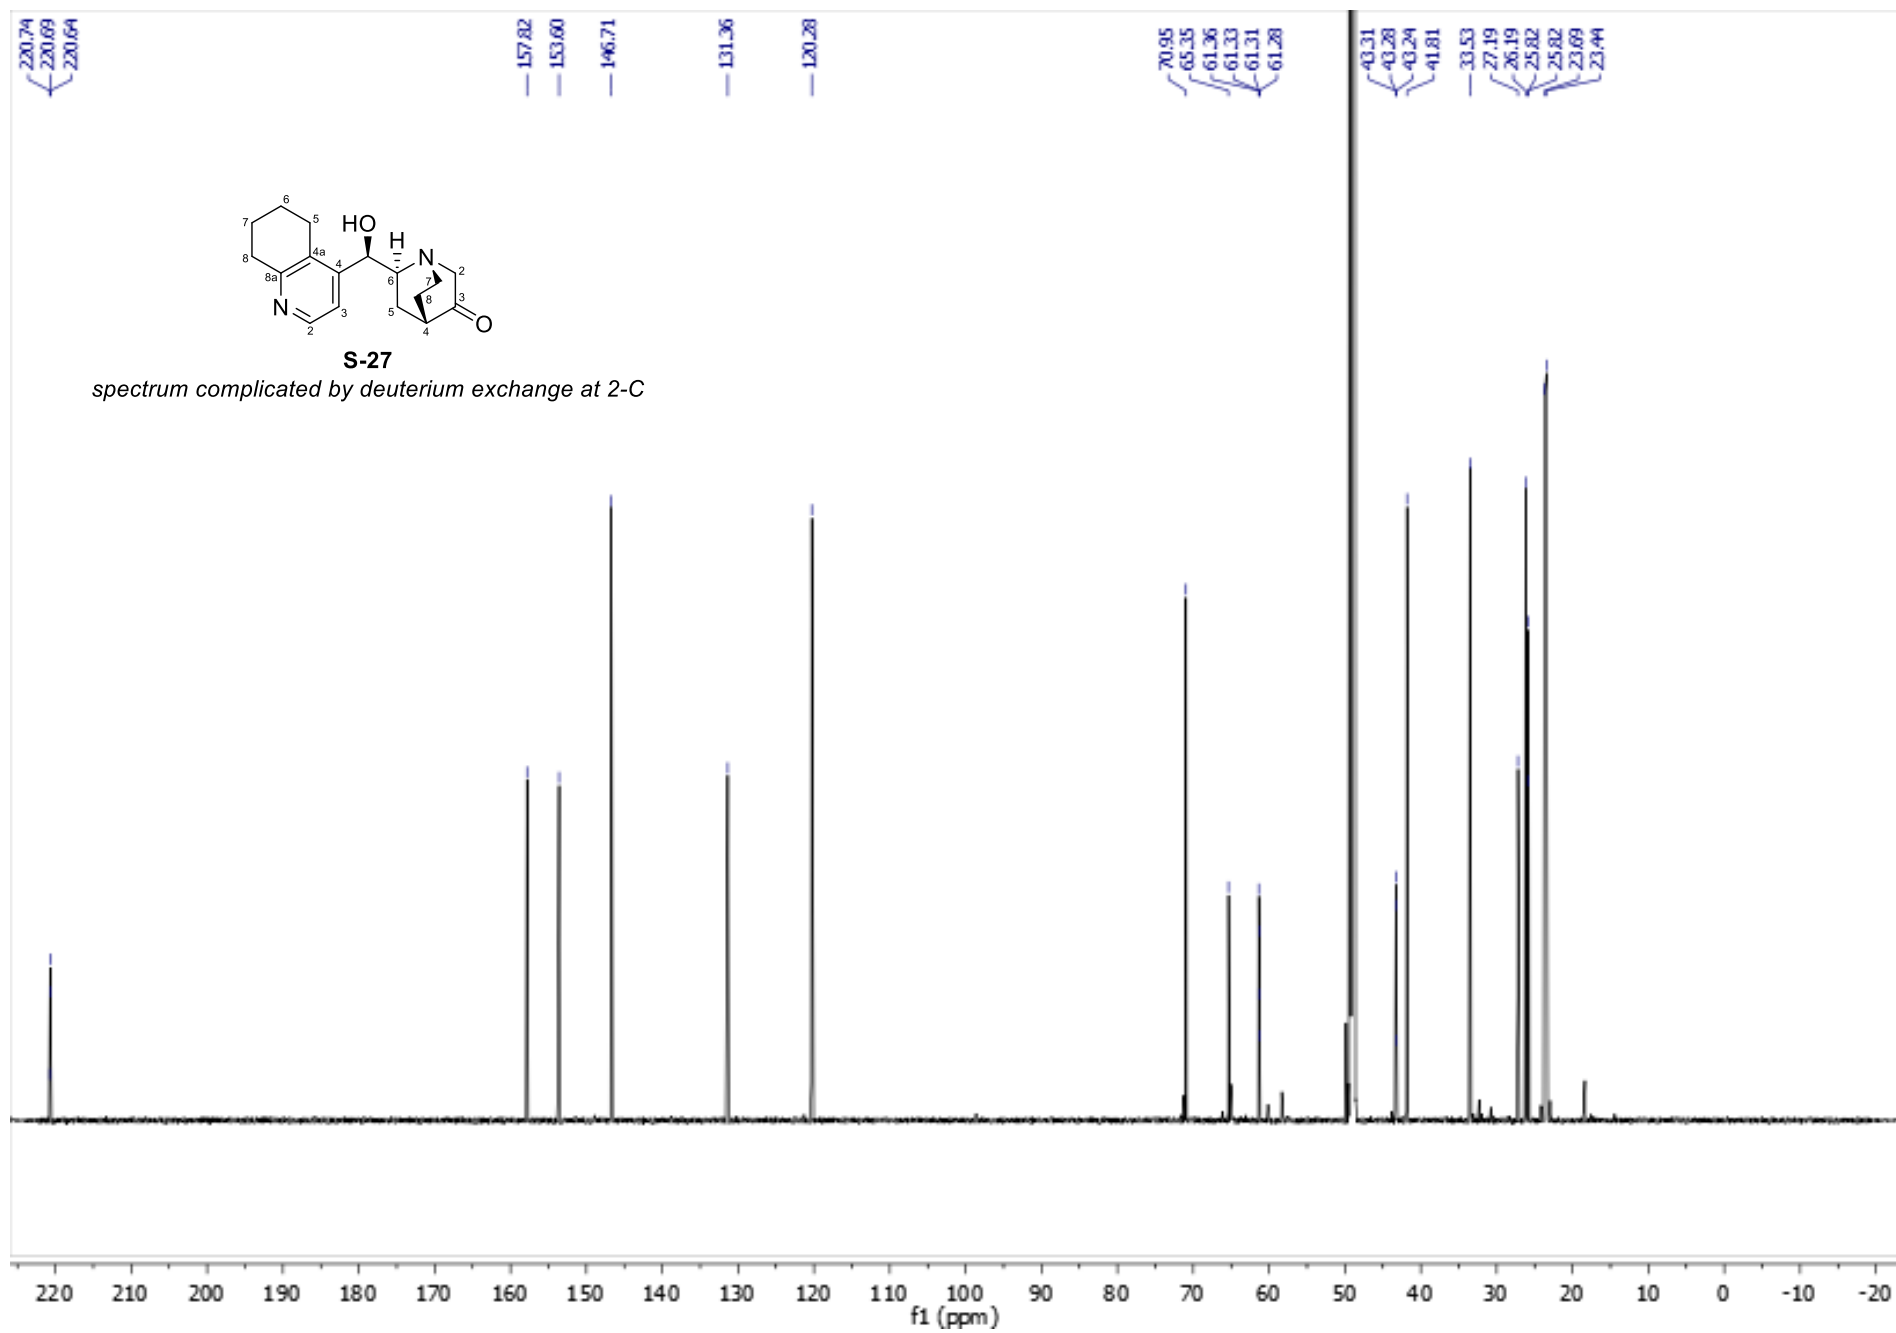

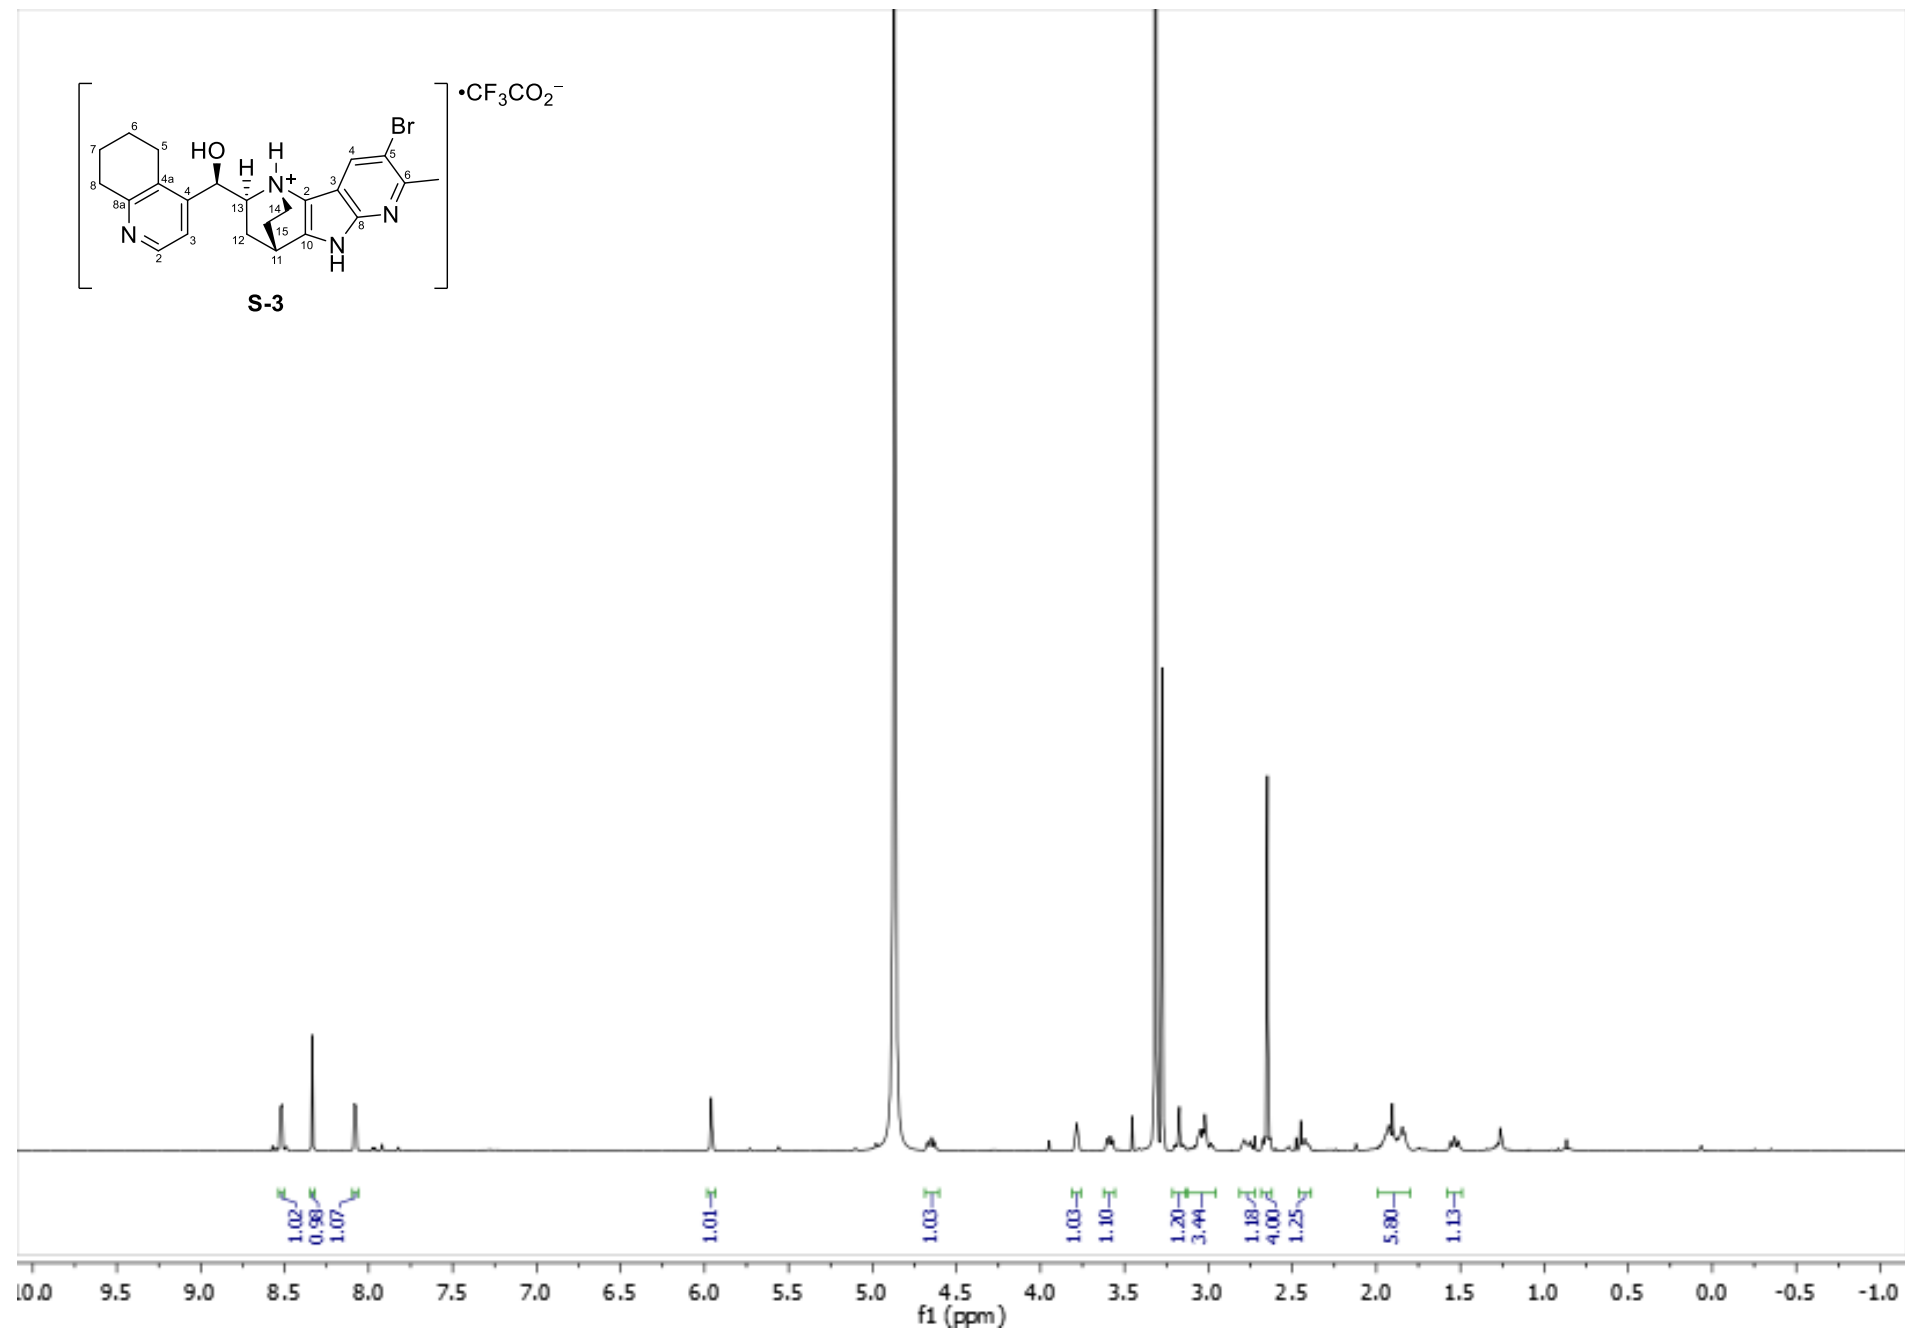

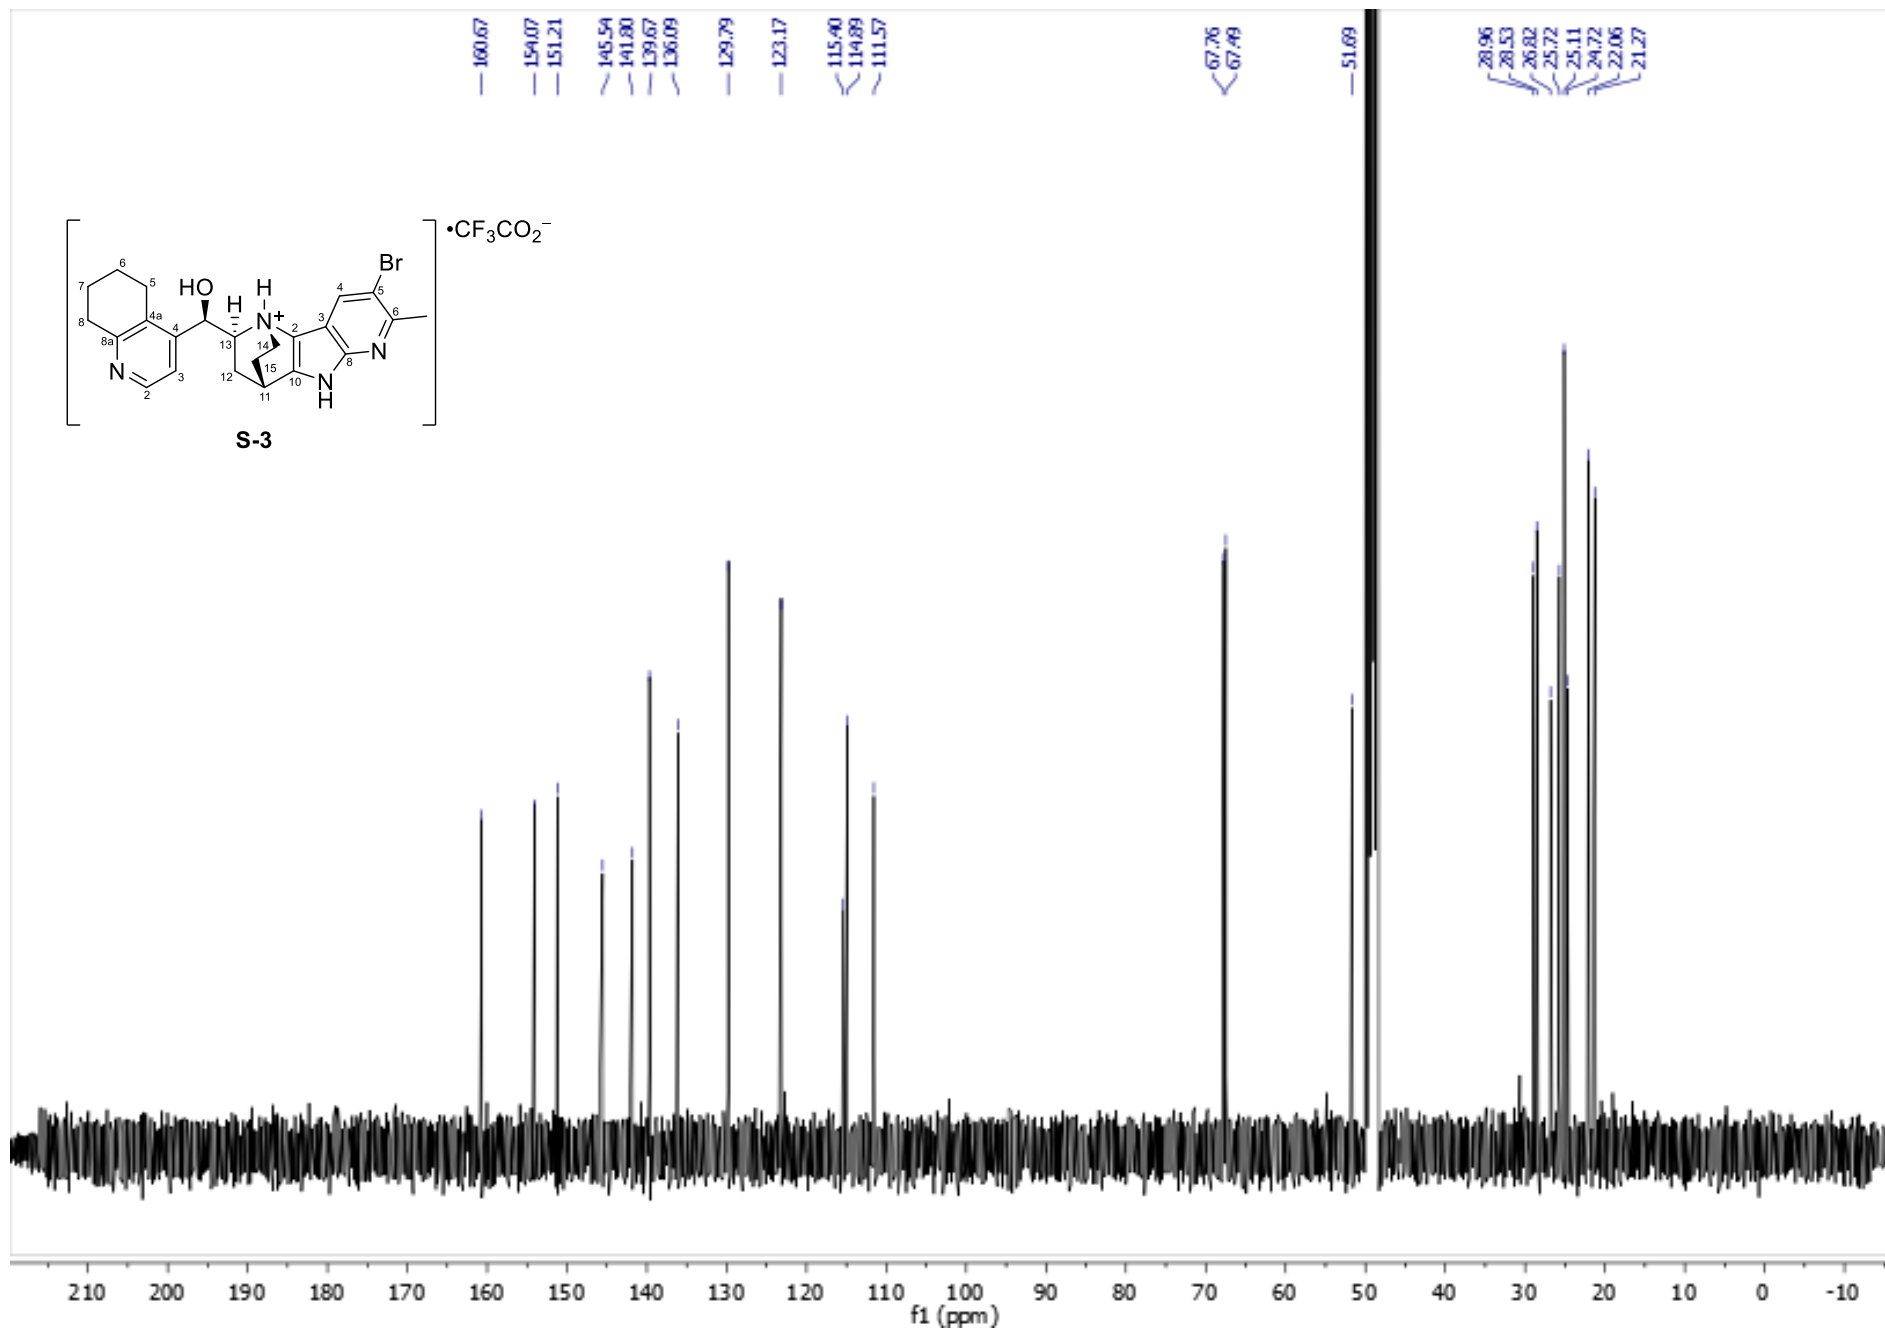

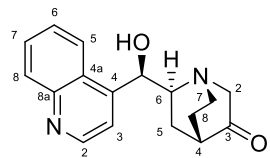

**S-28**

302

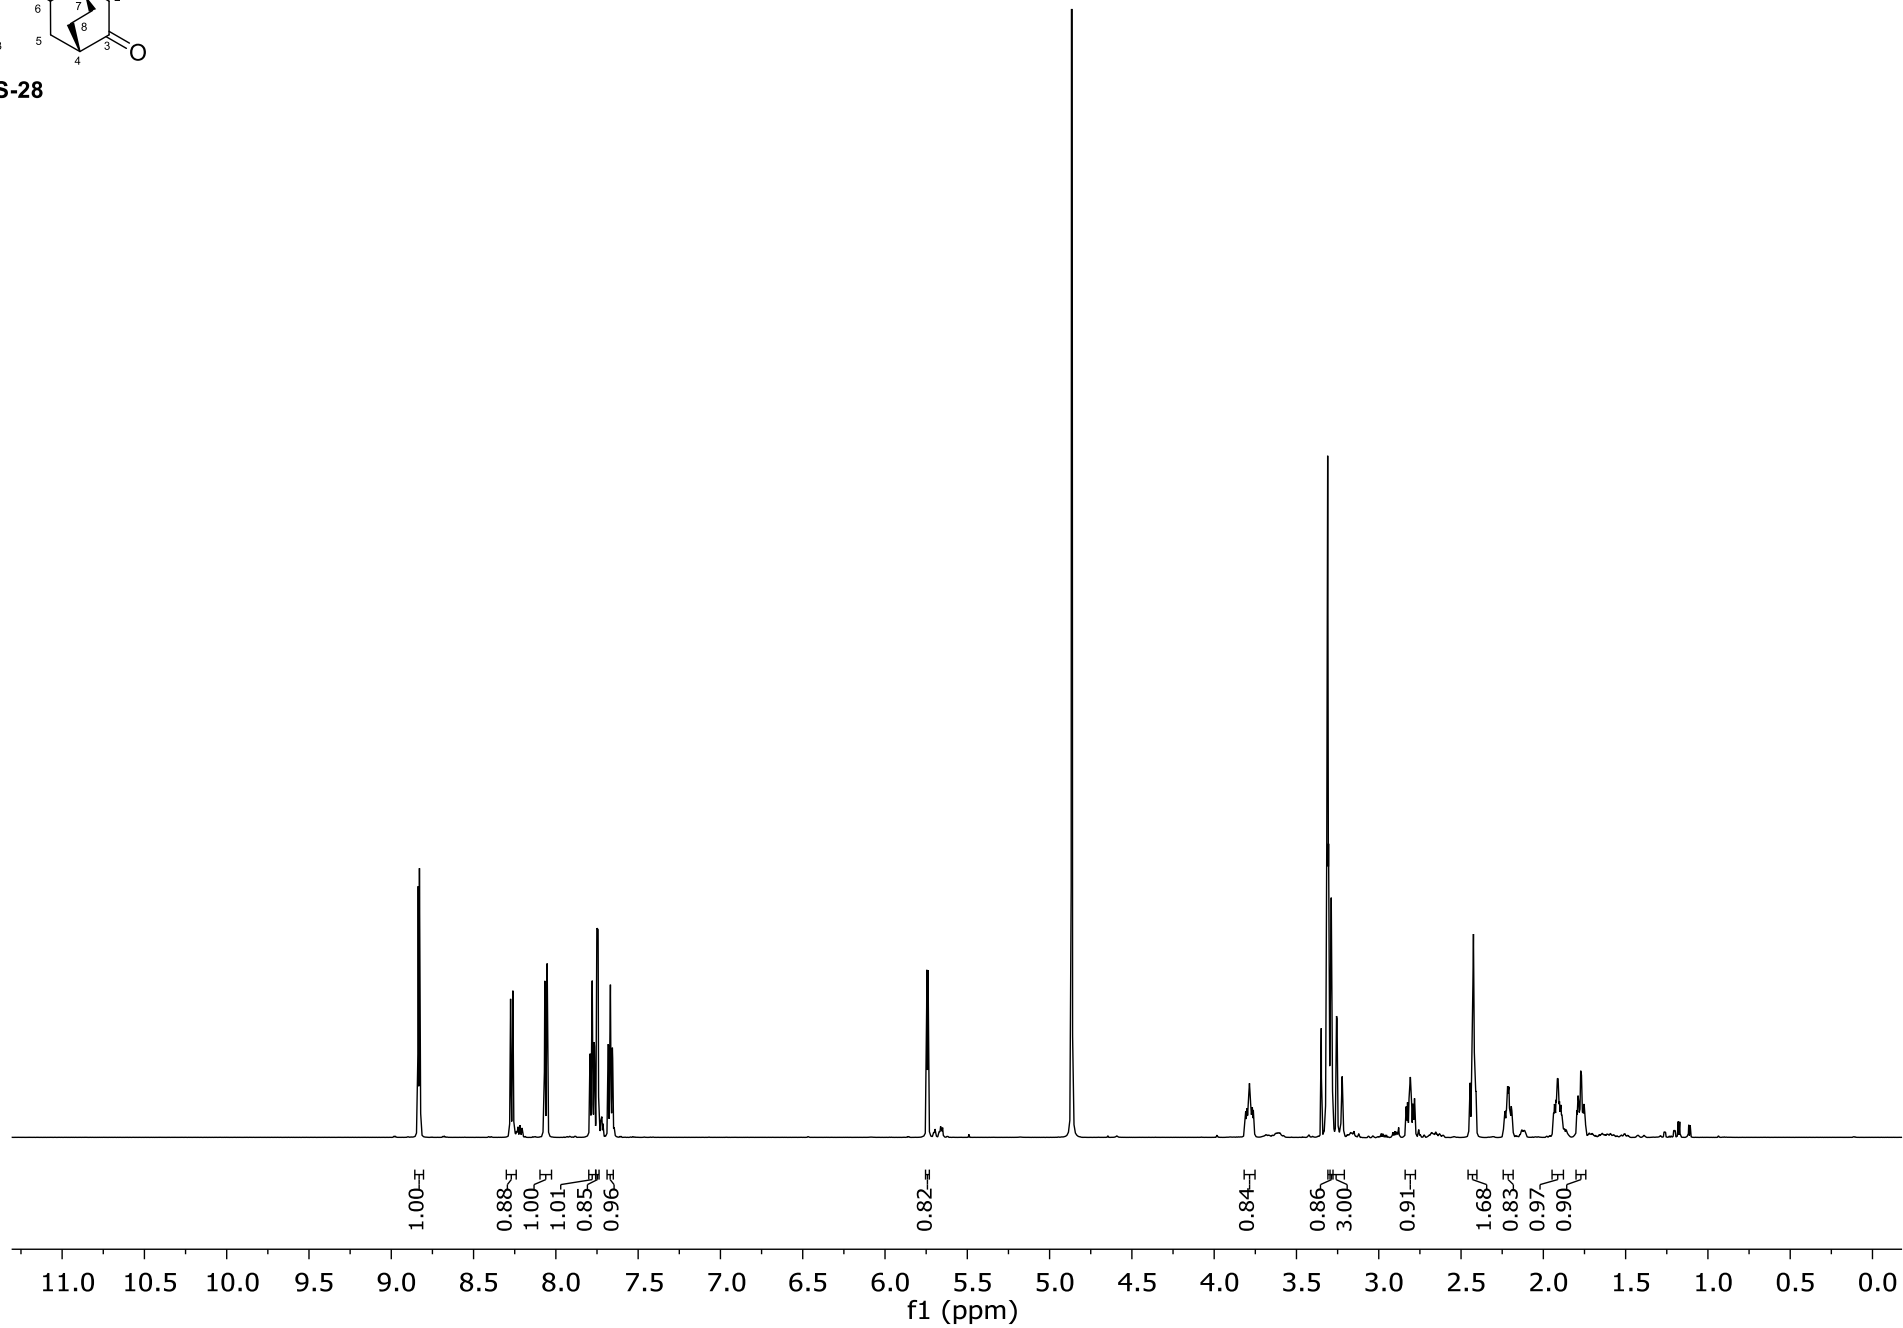

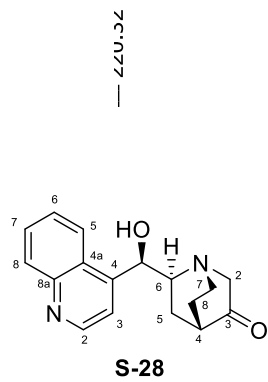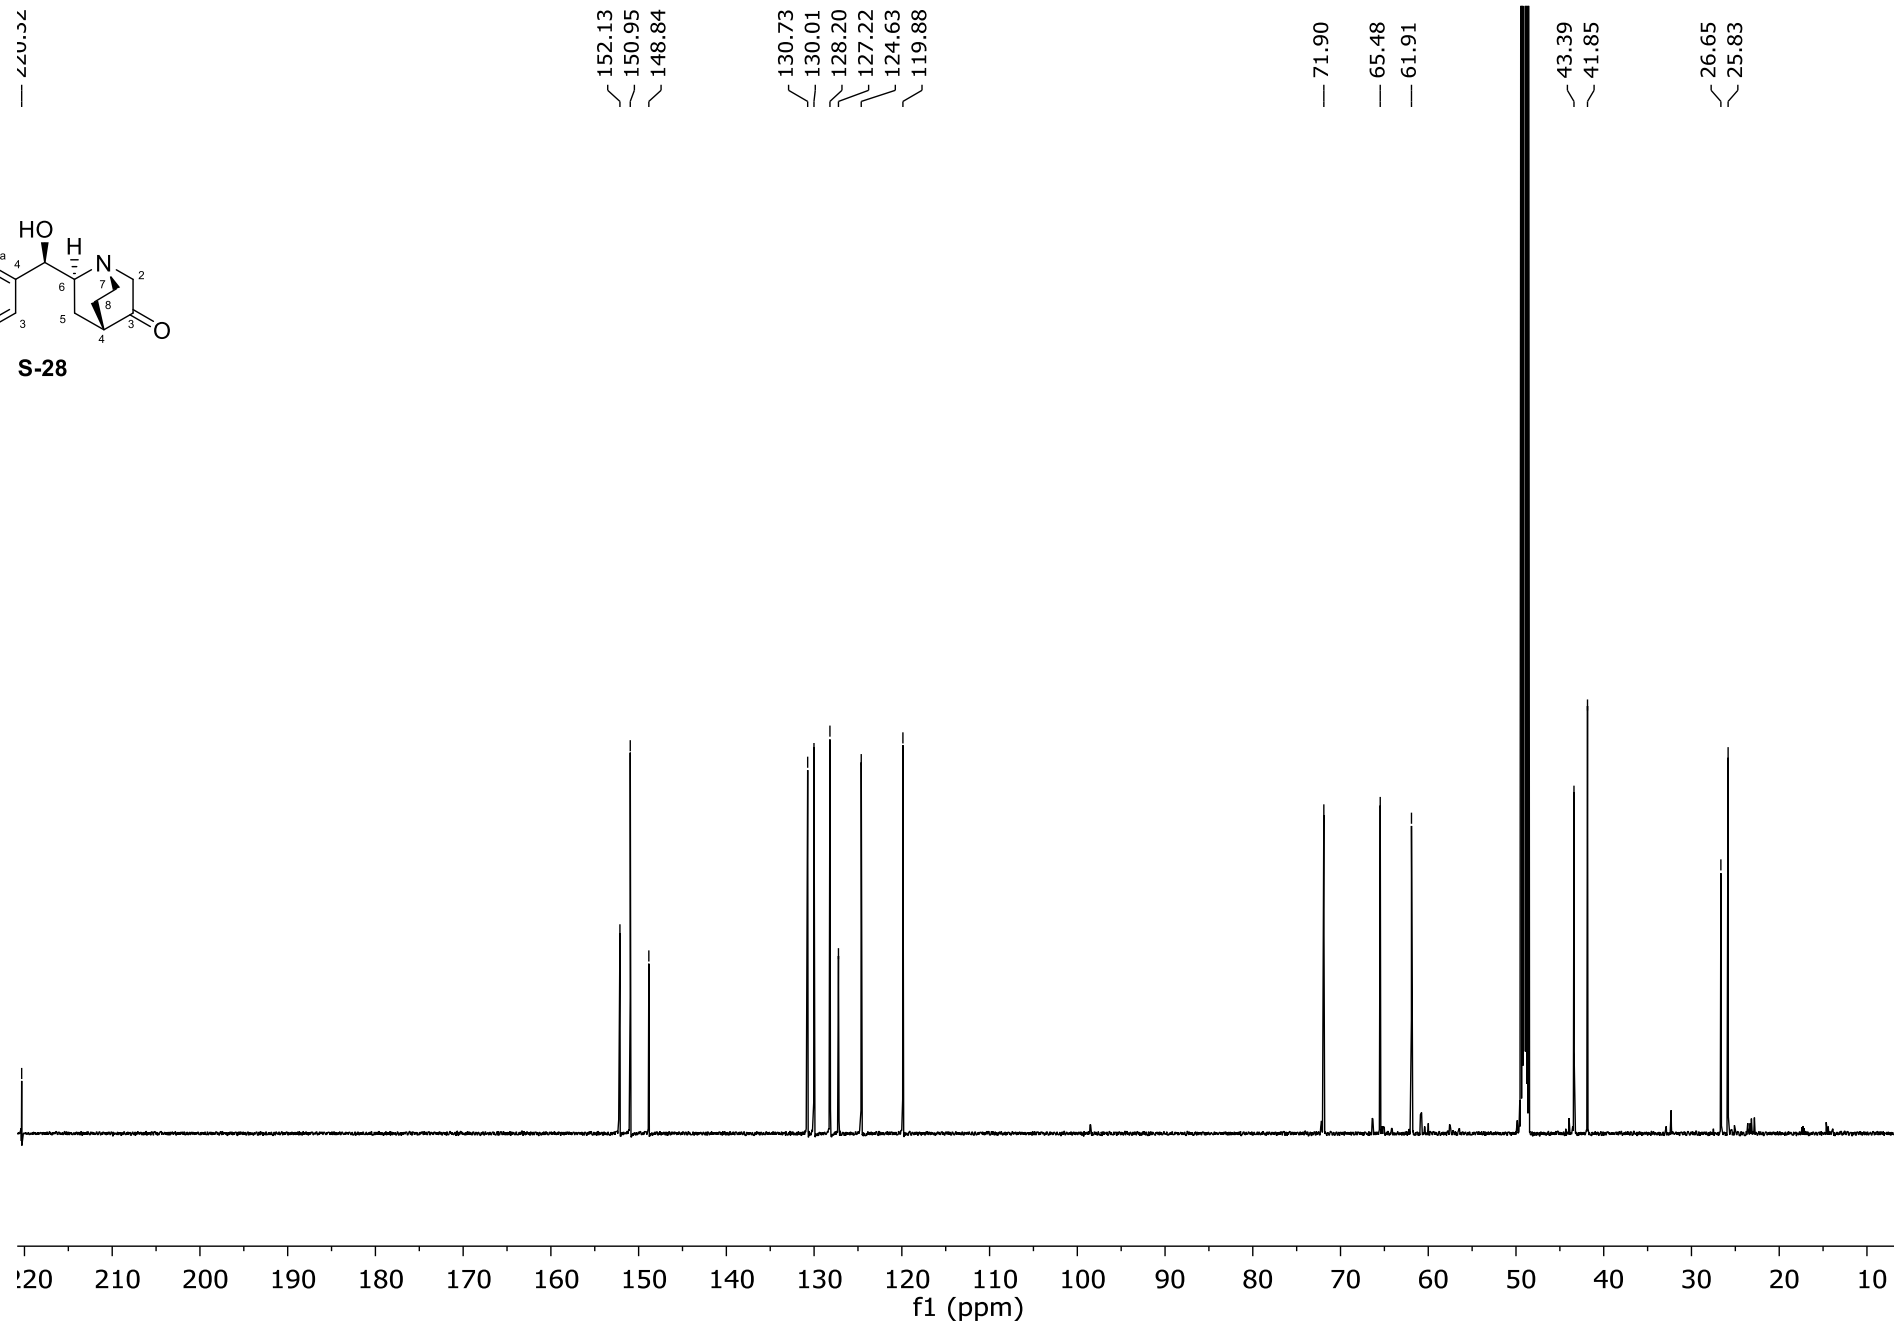



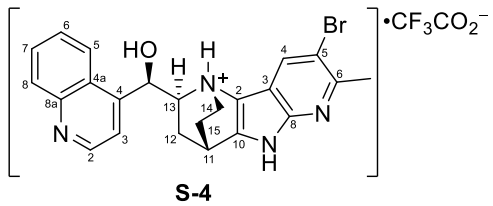

304

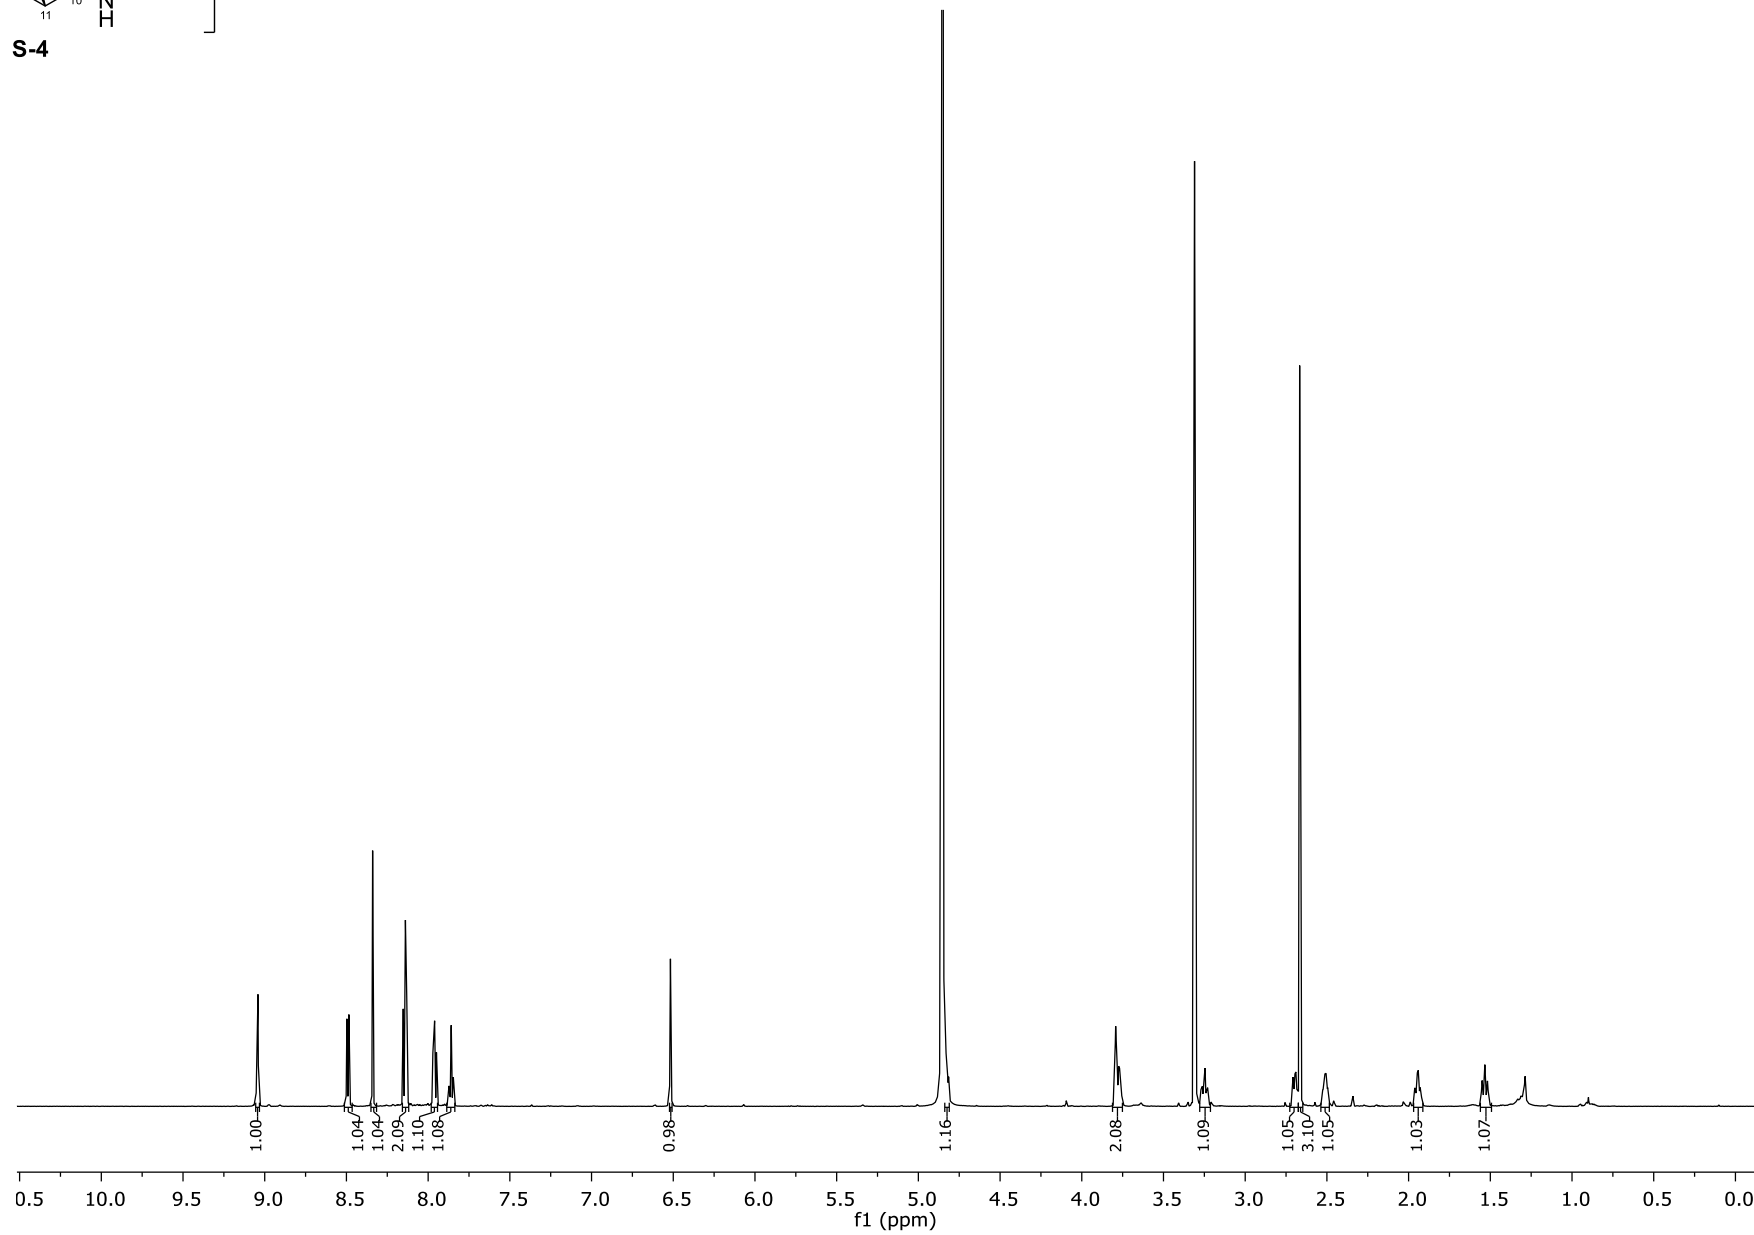

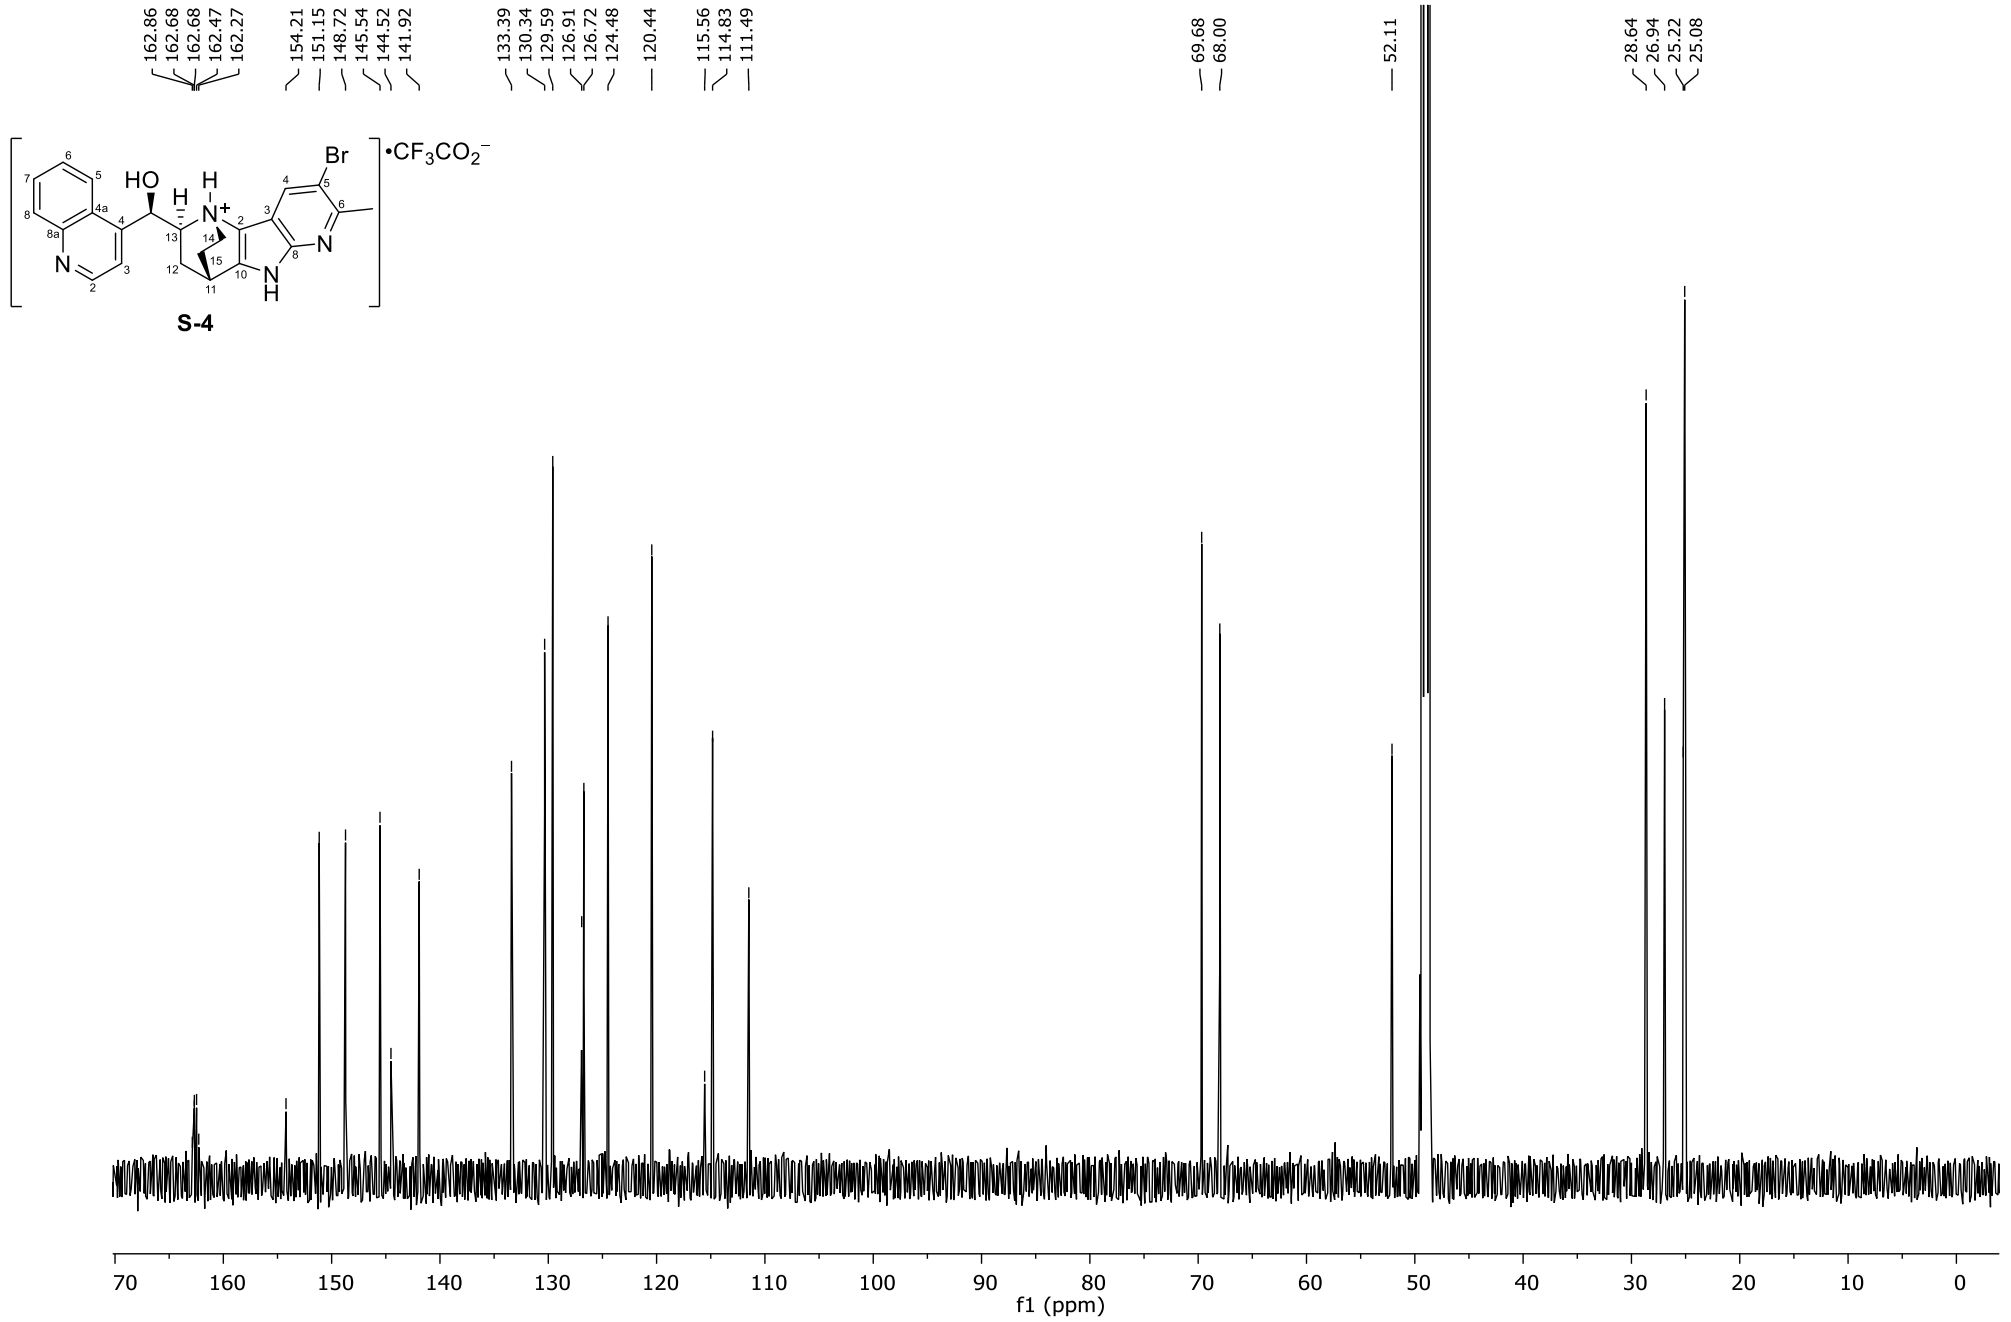

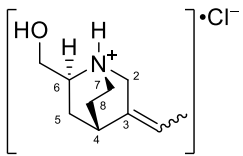

S-29

306

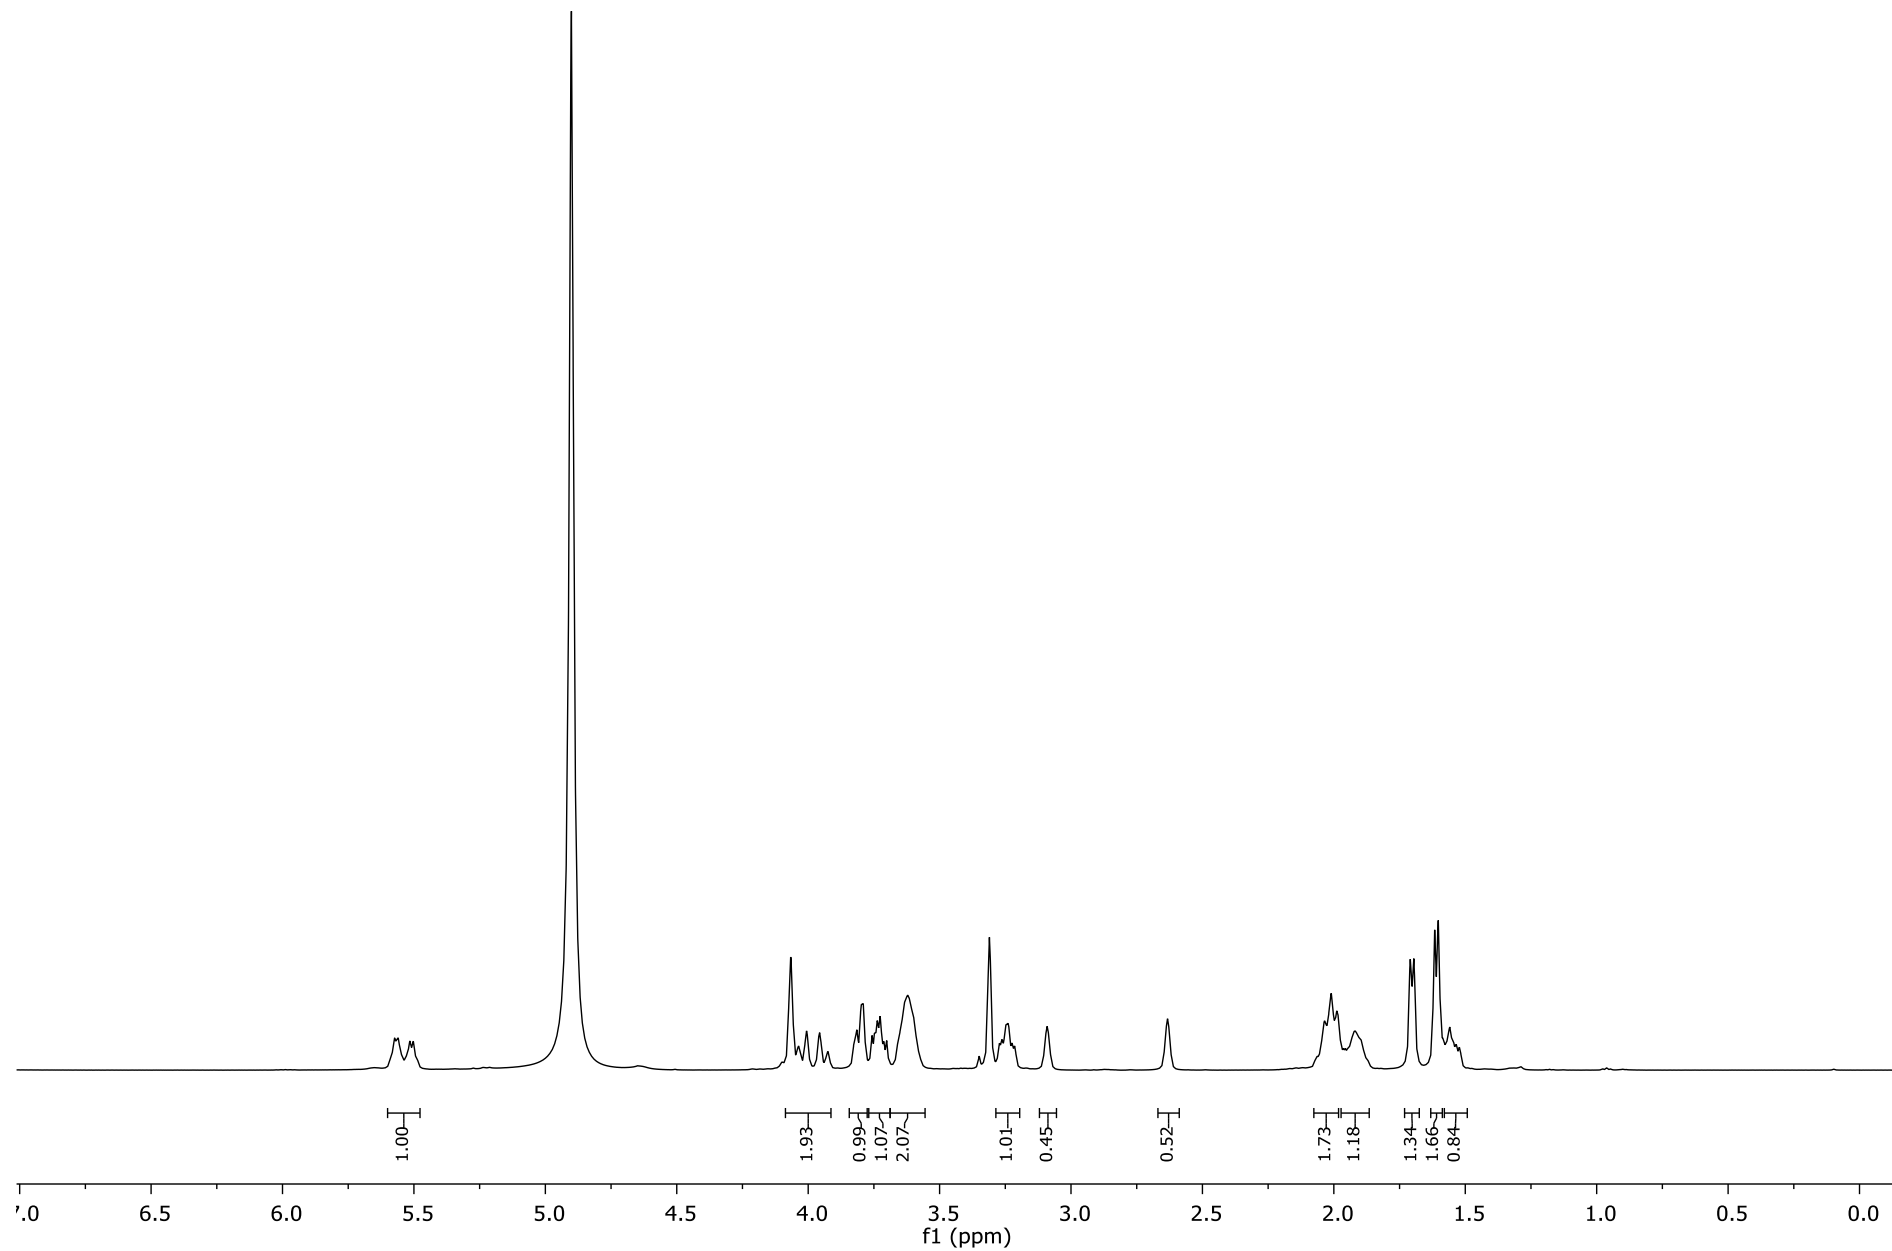

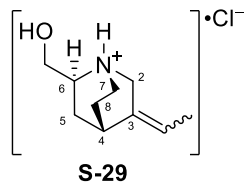

307

132.20  
131.37

120.81  
120.62

61.59  
61.44  
61.35  
61.20  
56.87  
55.07

42.76  
42.63

31.93  
28.39  
27.49  
25.35  
25.10  
24.46

12.89  
12.79

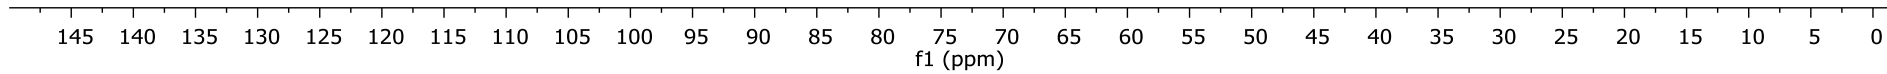

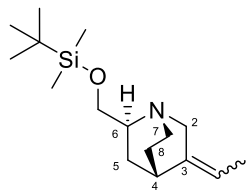

S-30

308

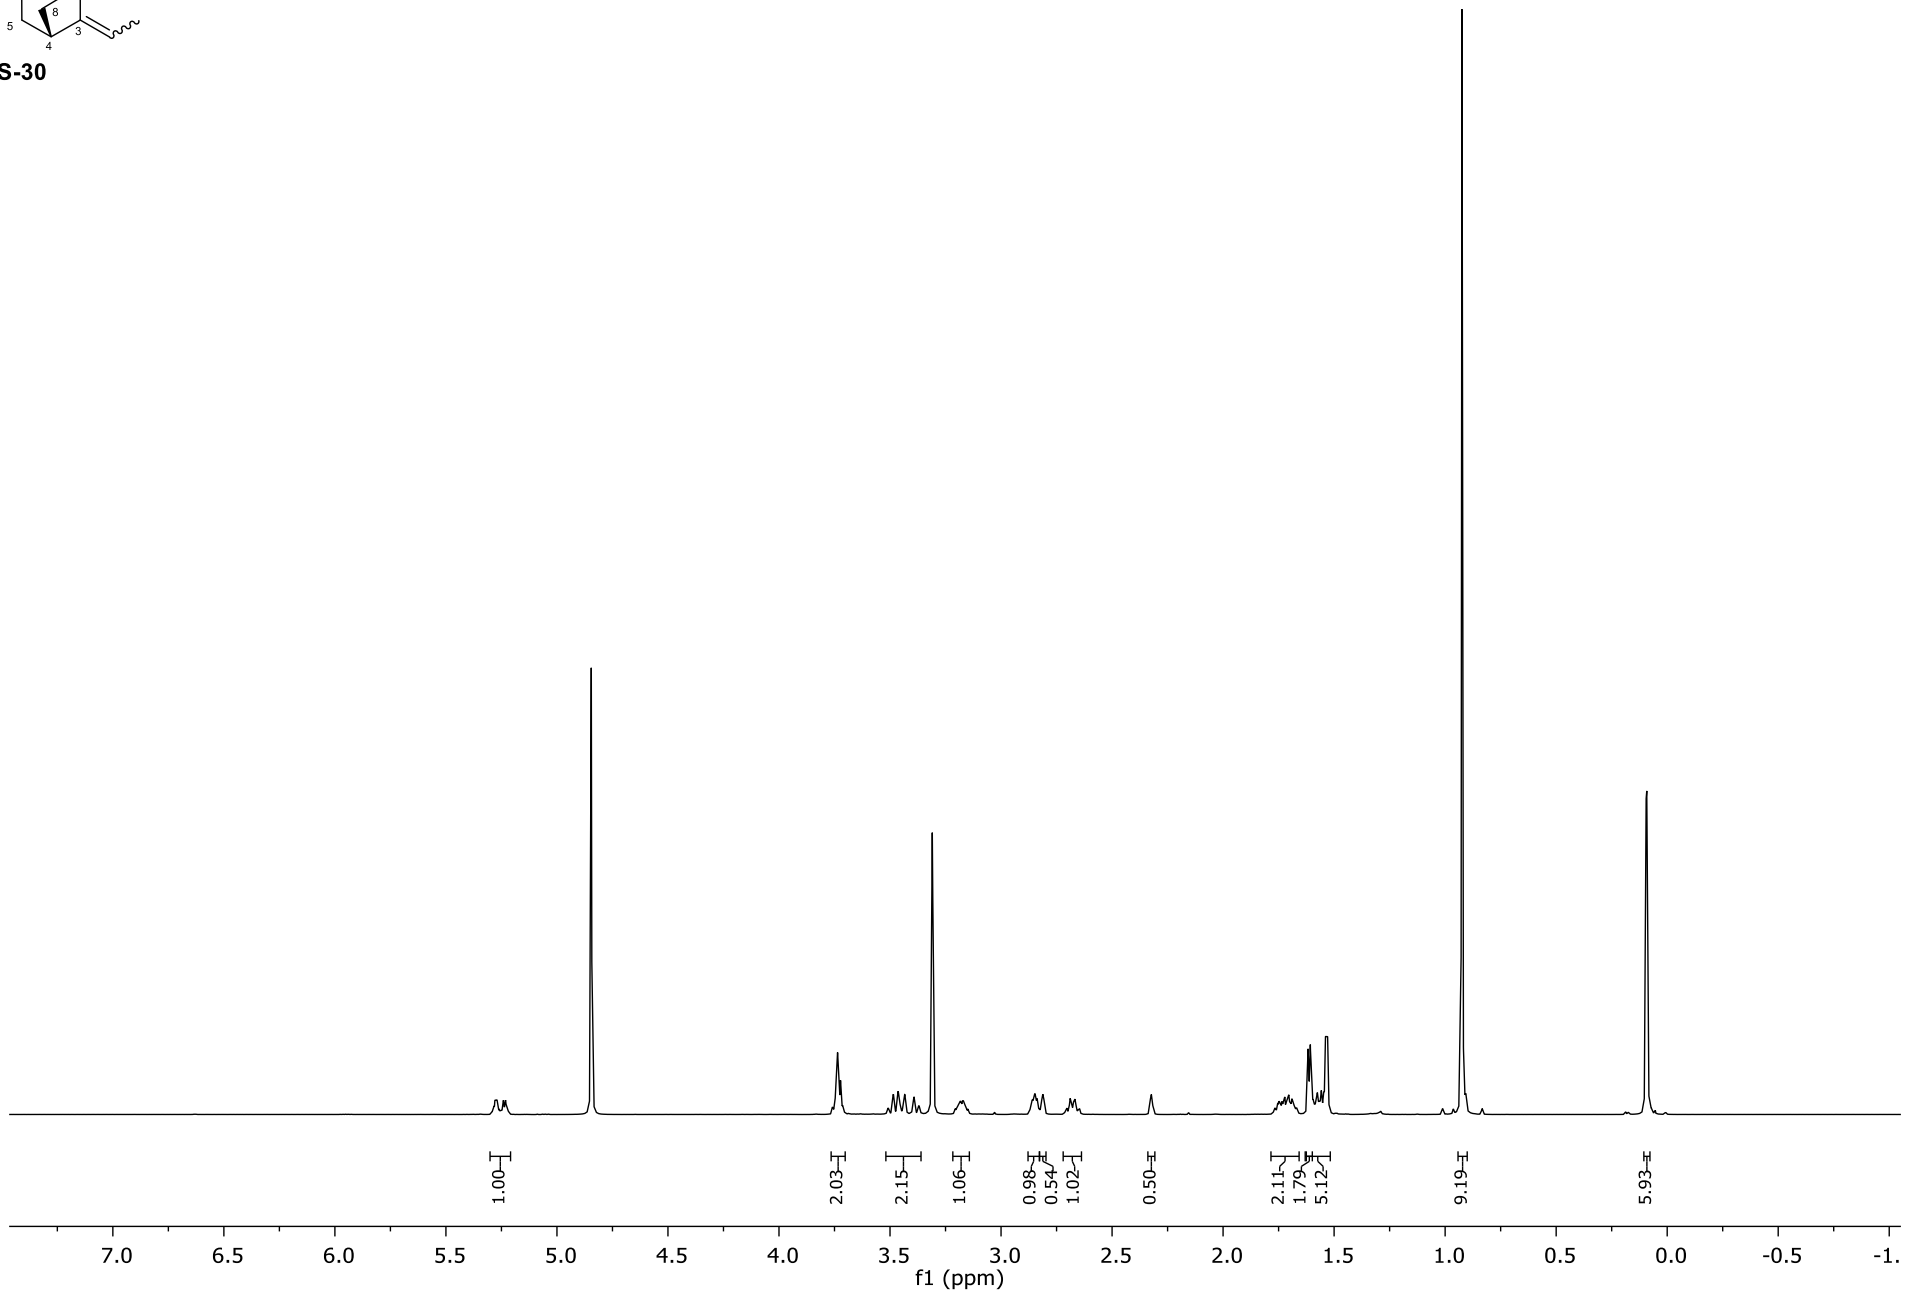

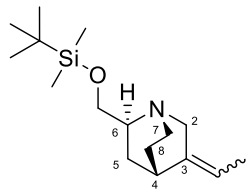

S-30

309

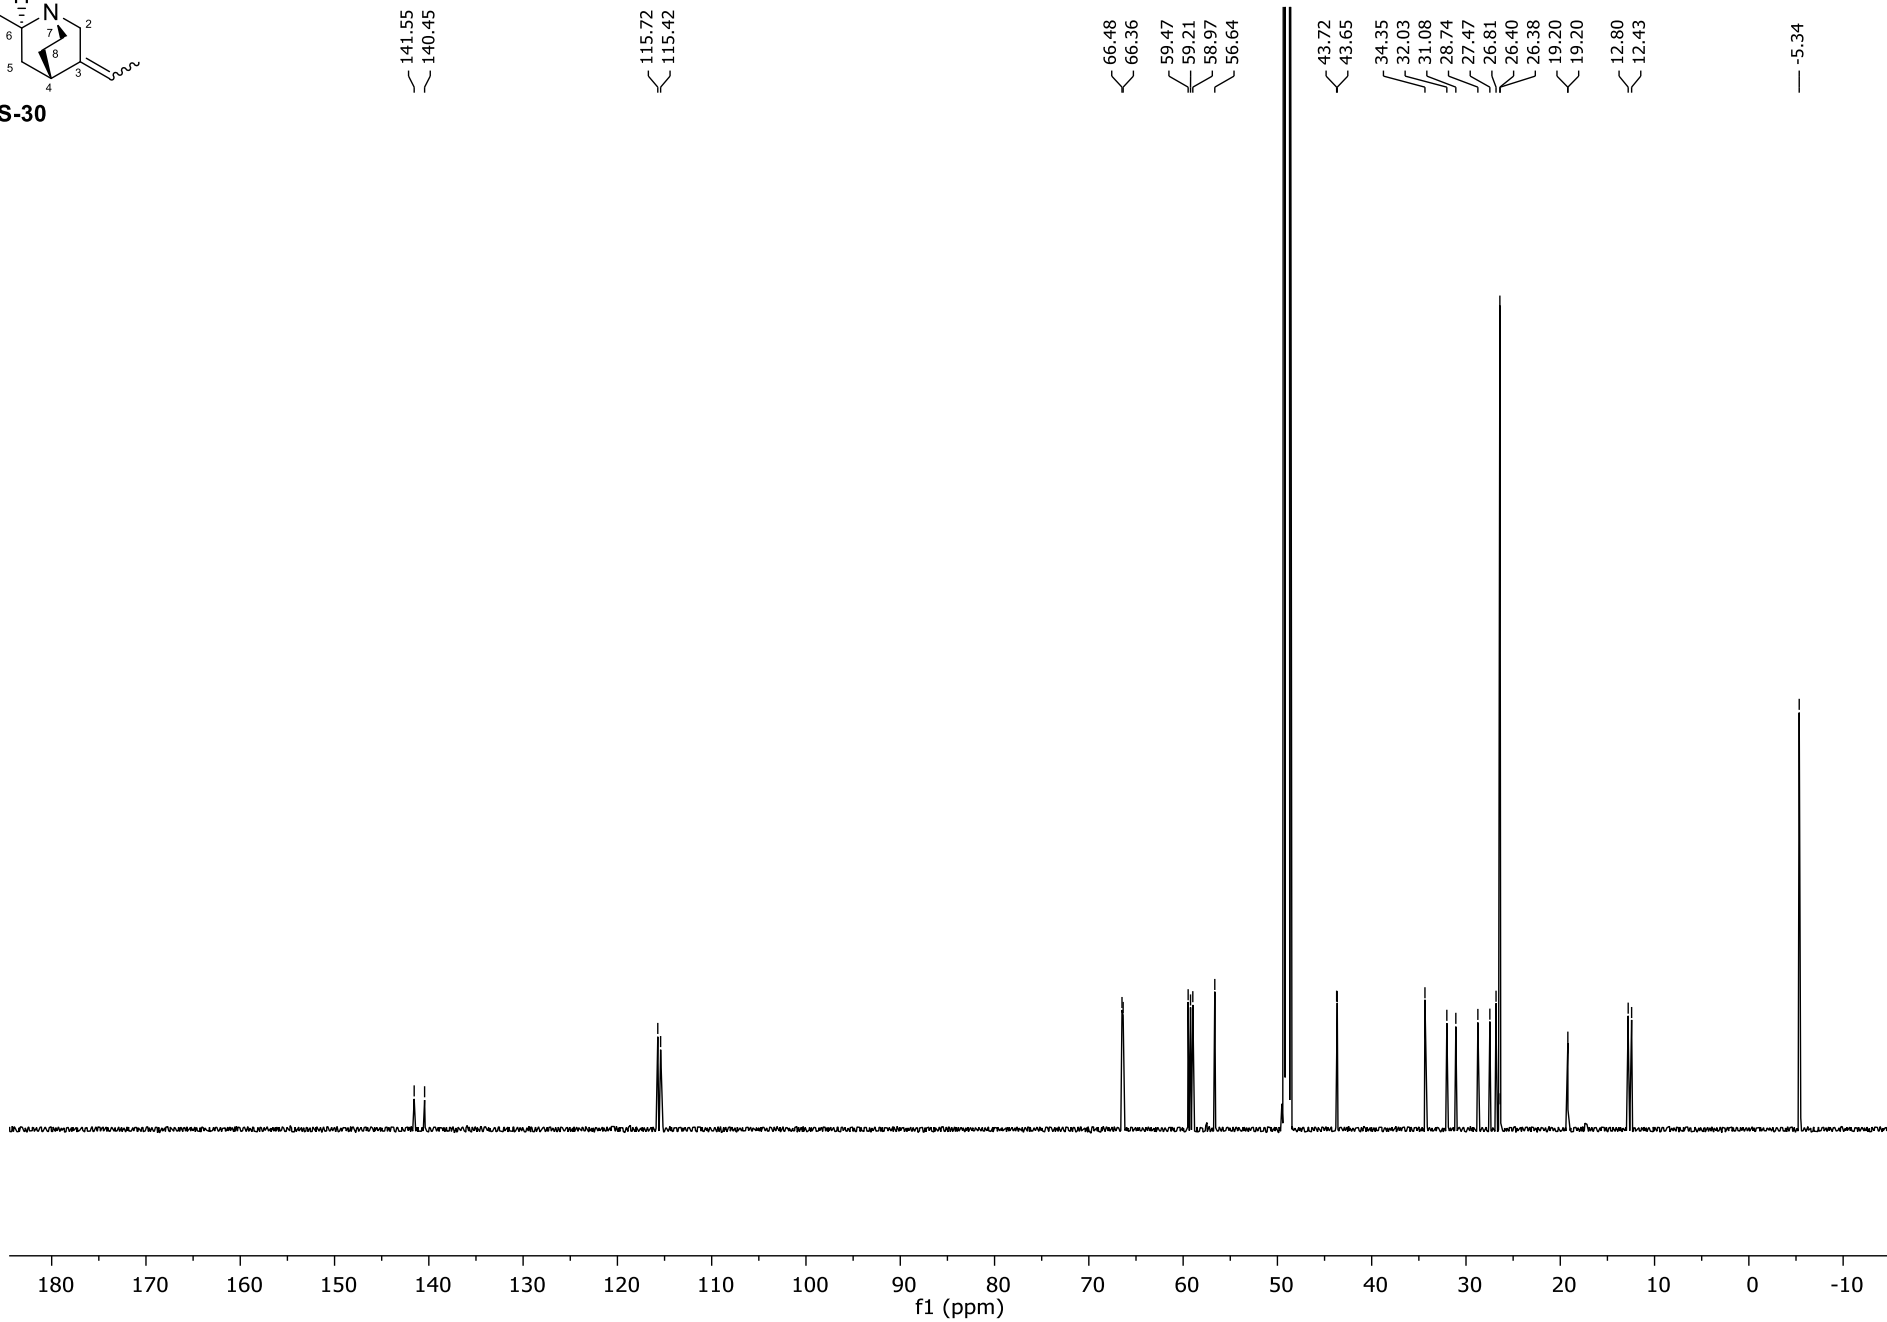

310

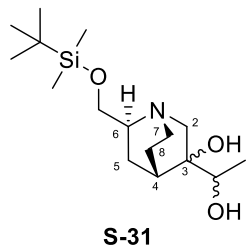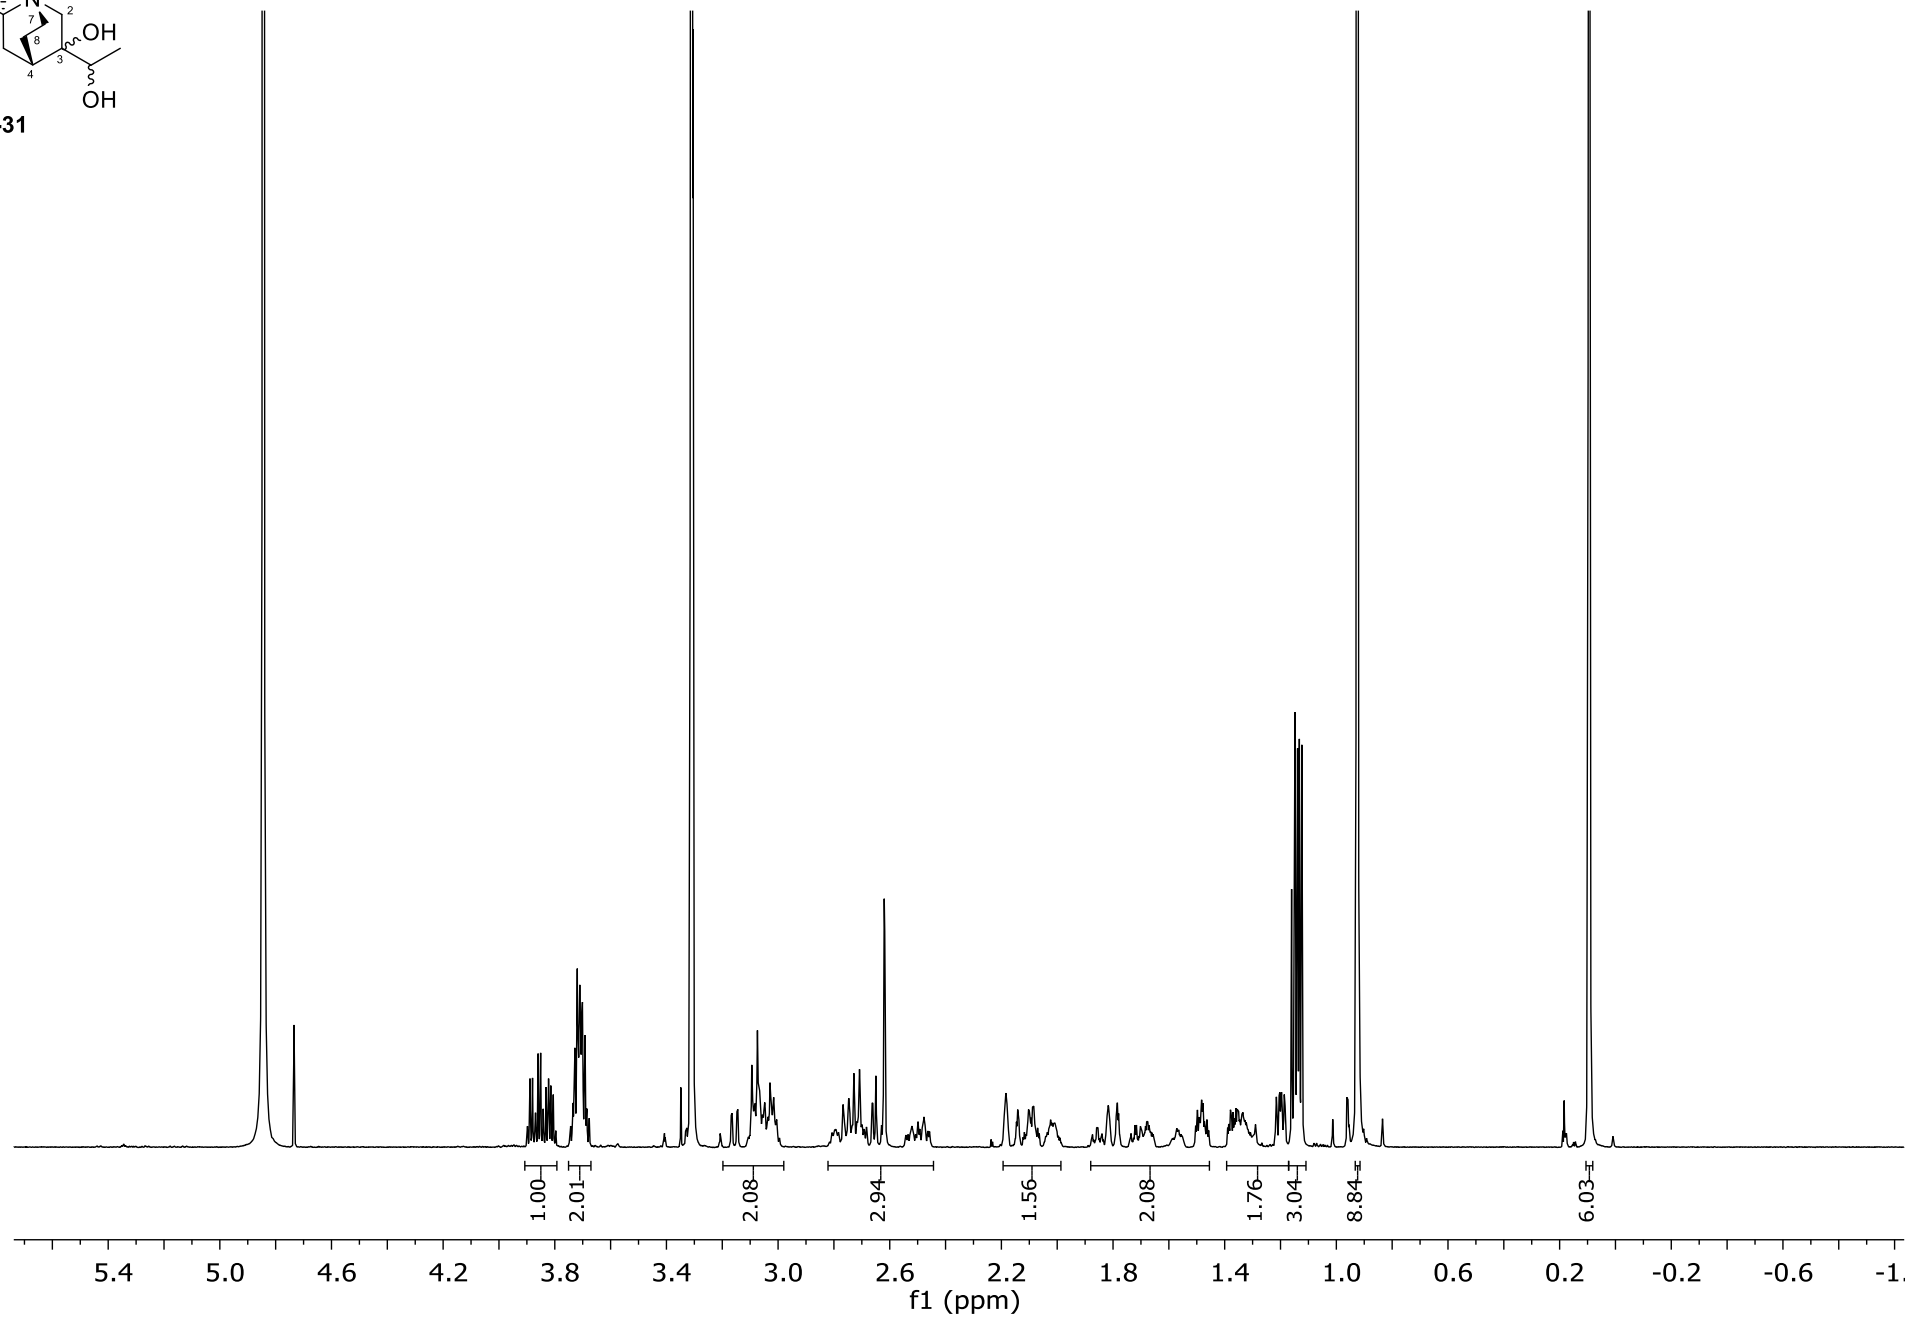

311

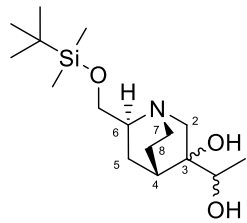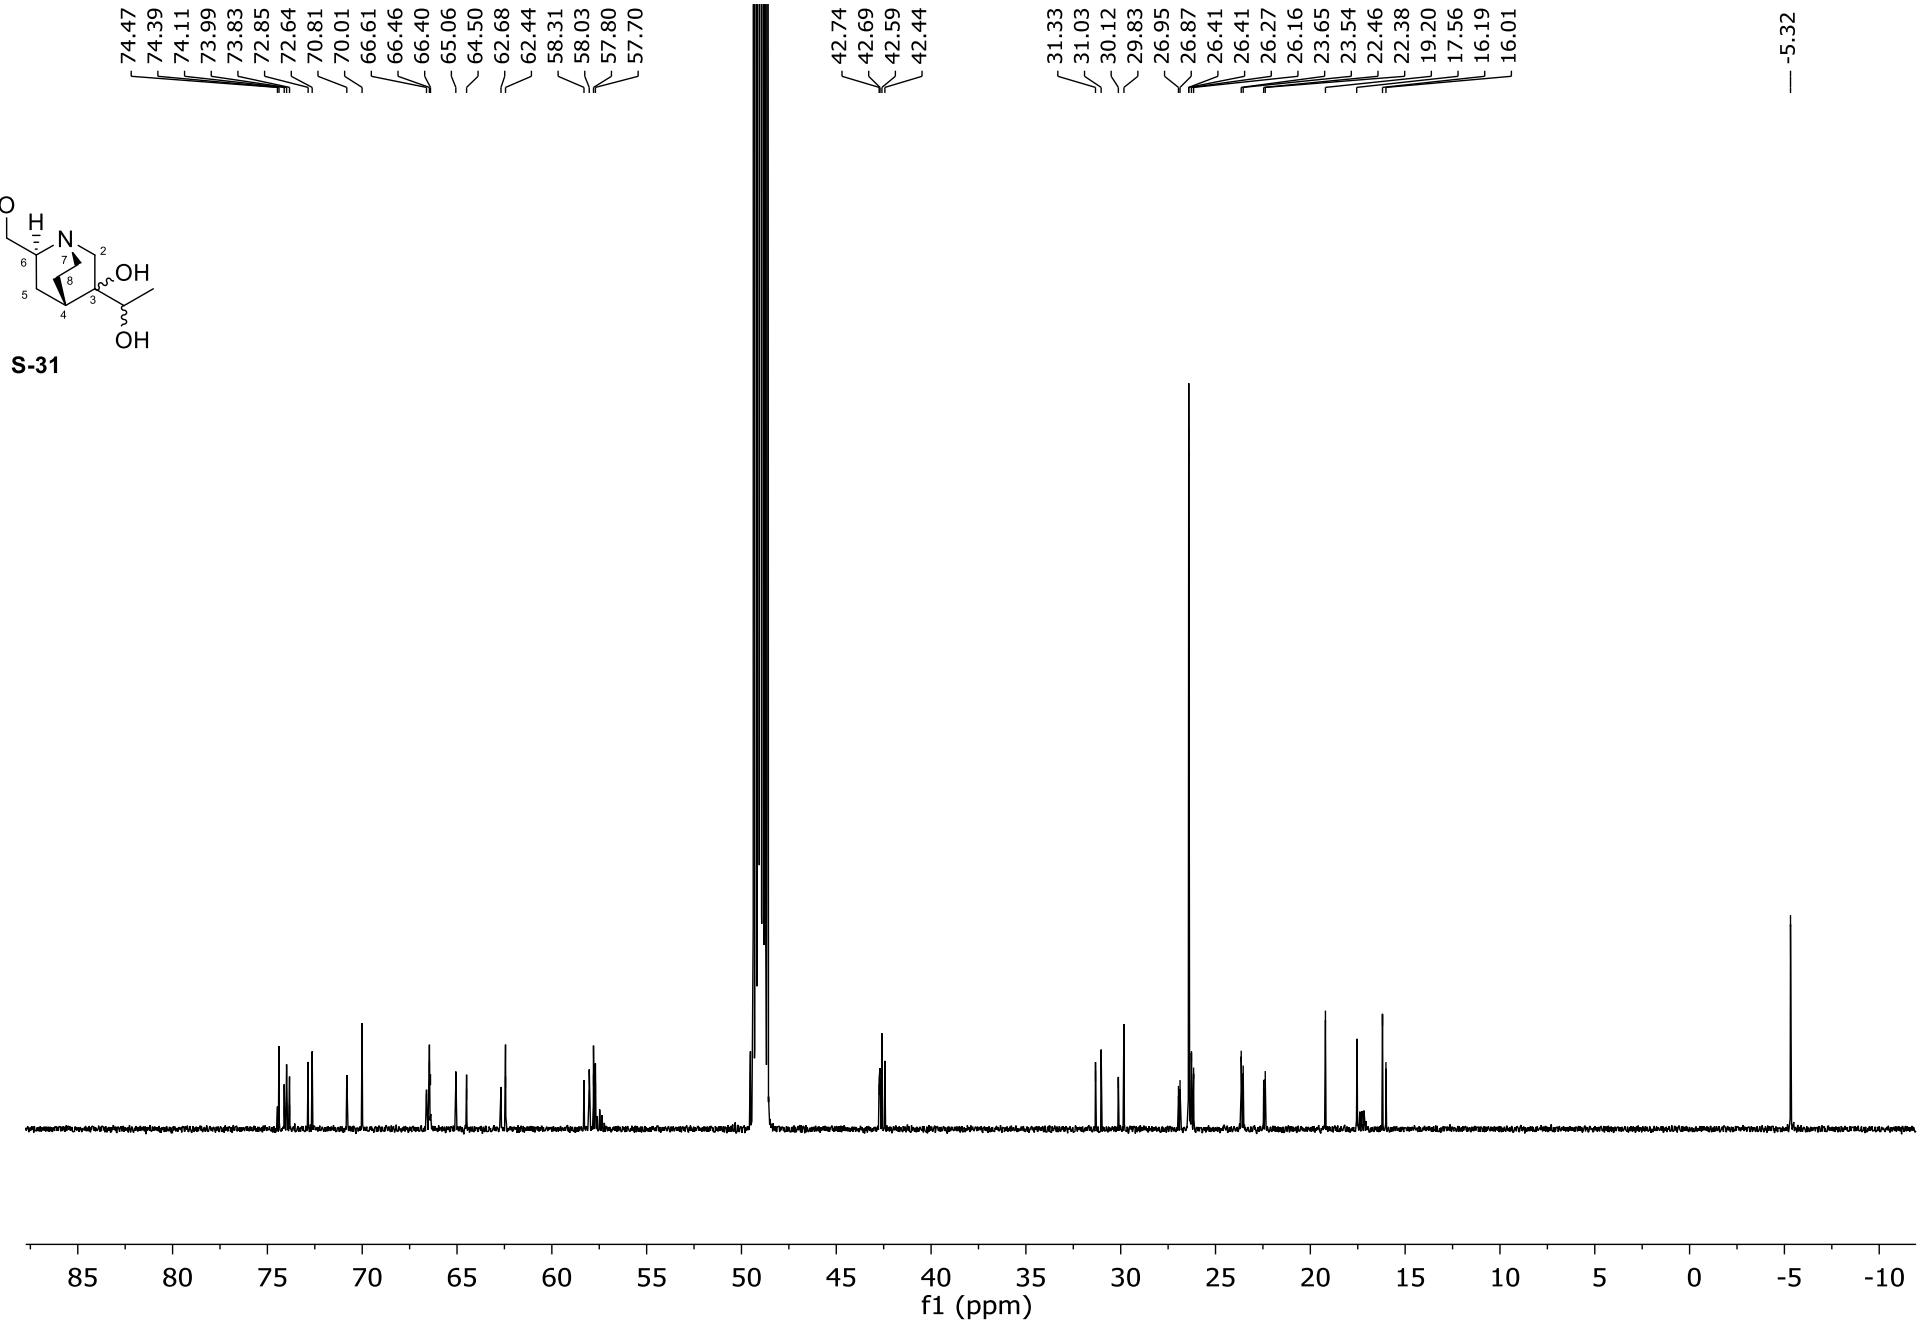



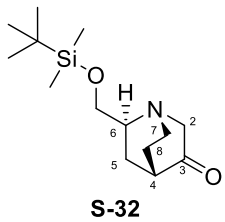

312

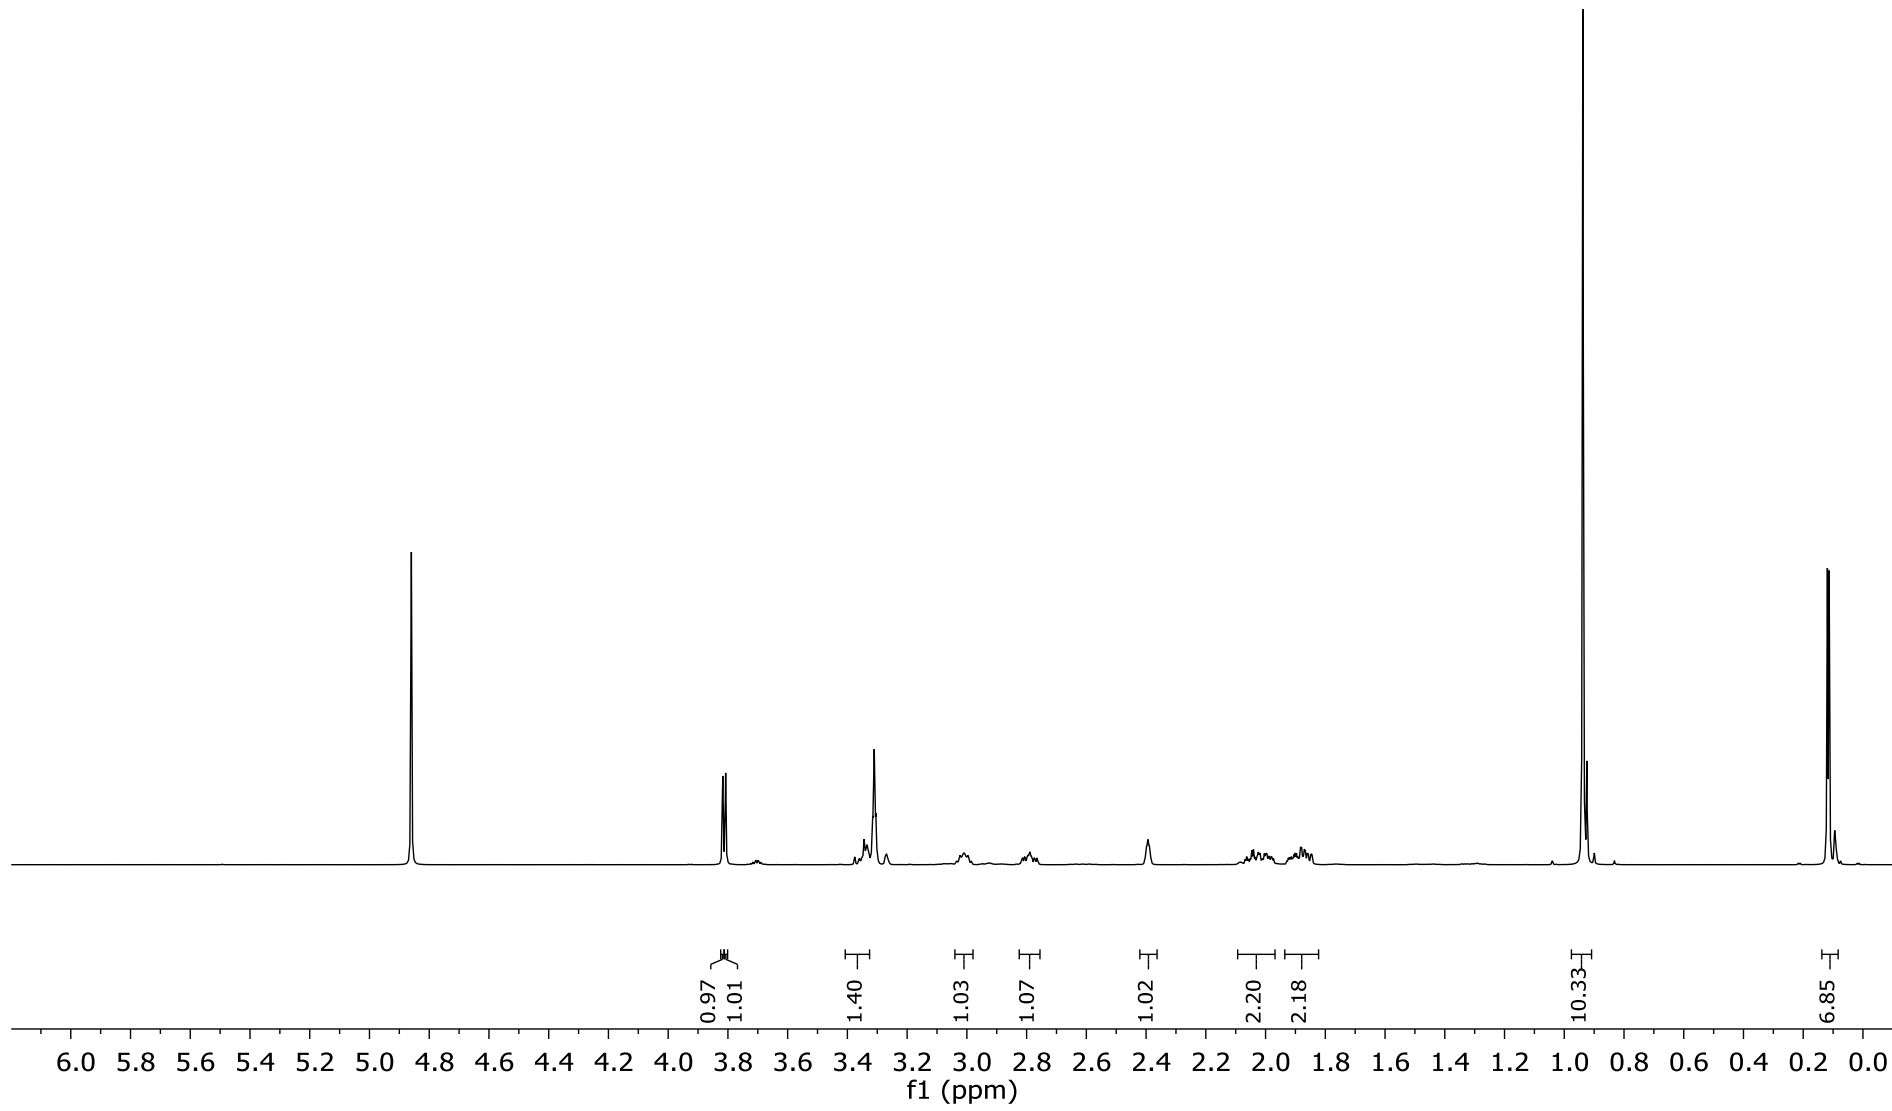

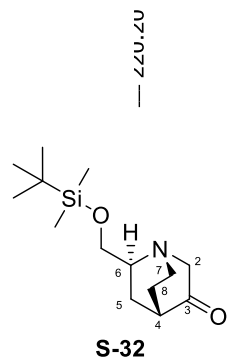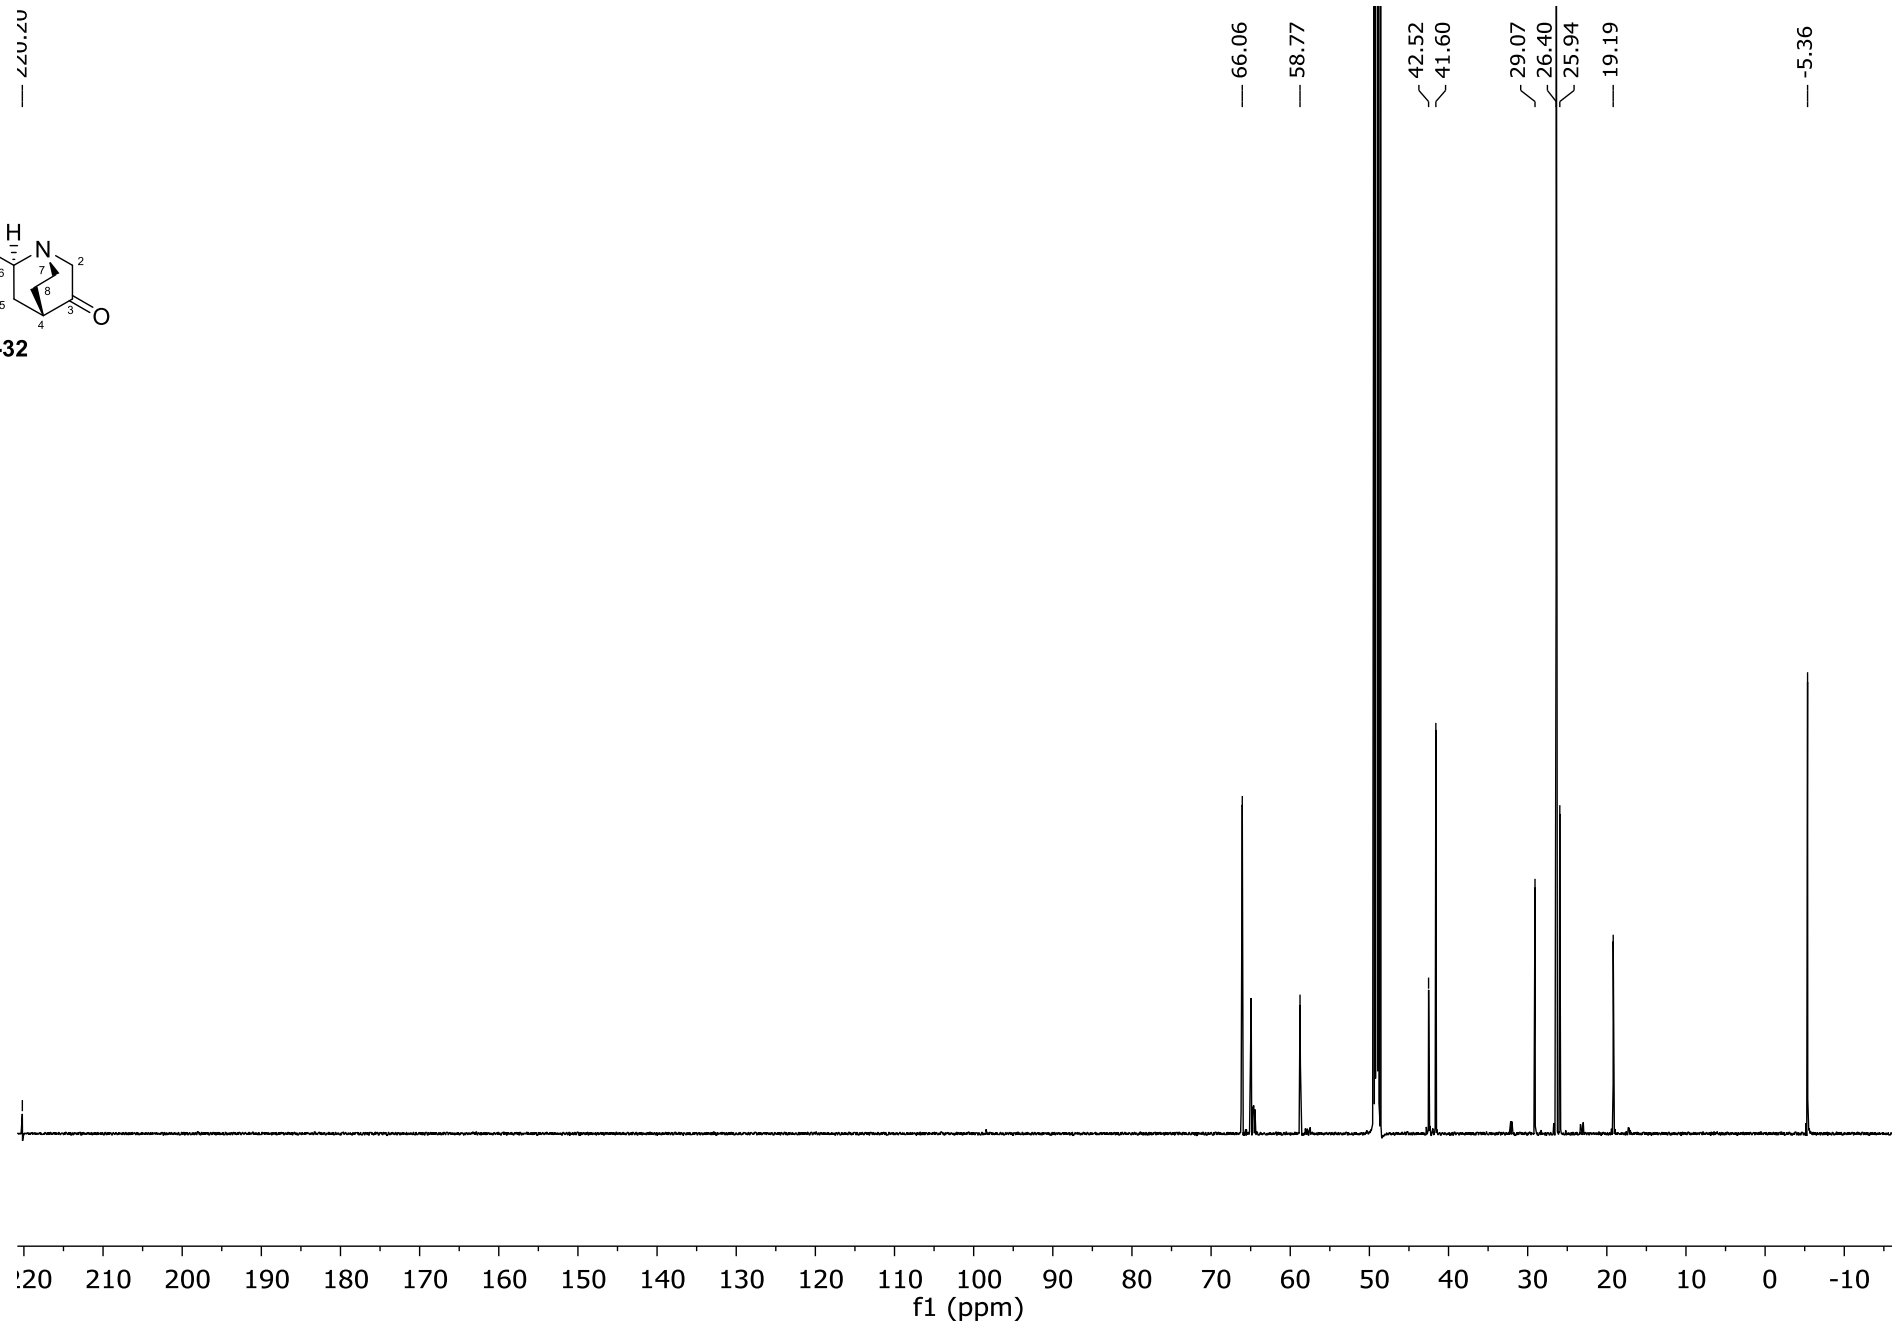

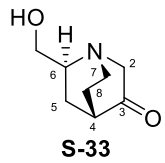

314

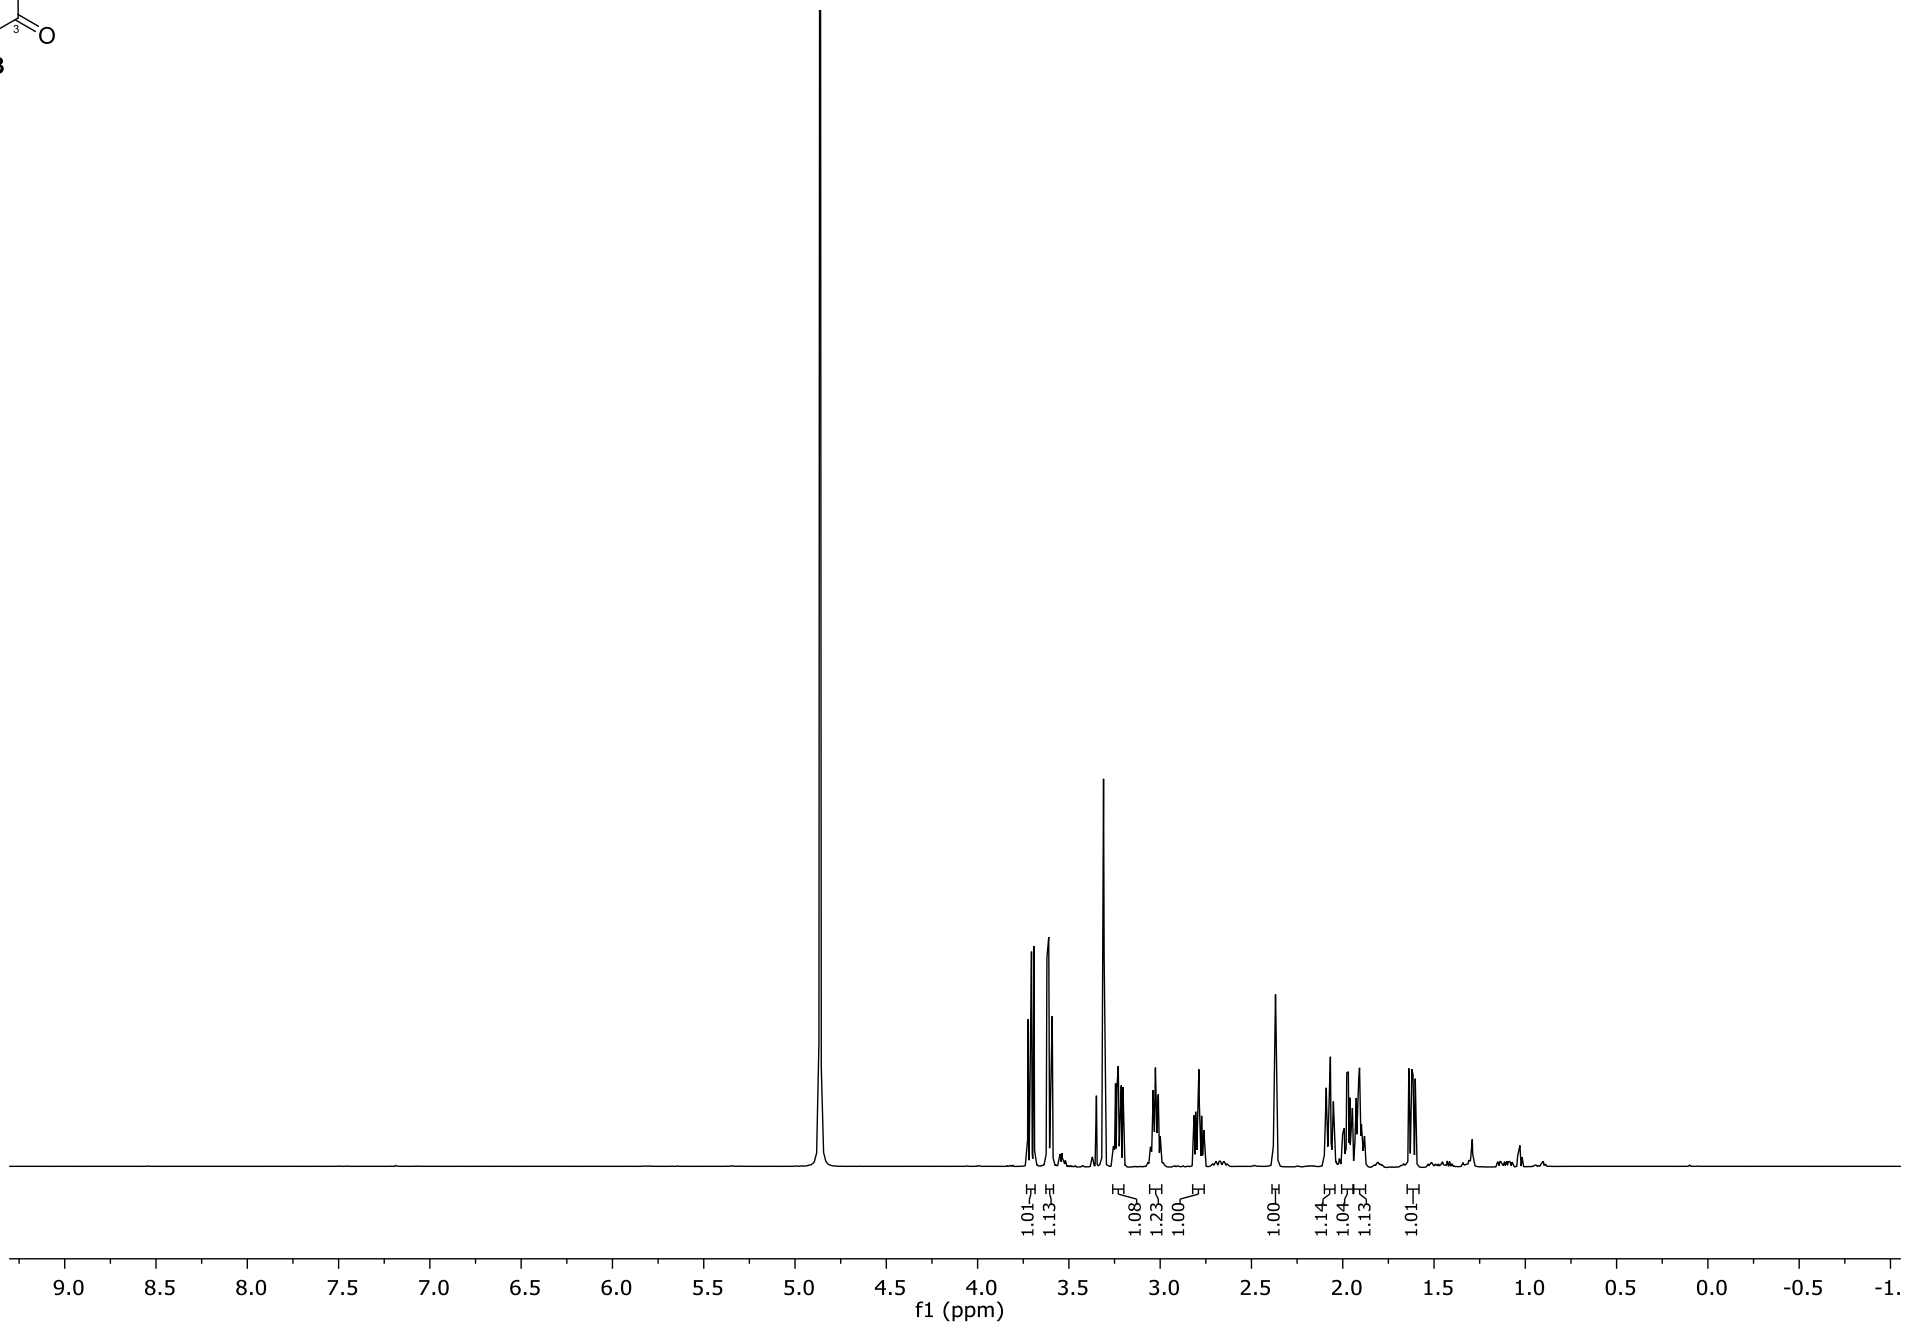

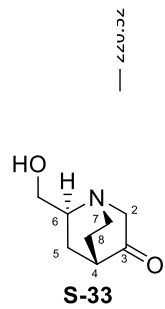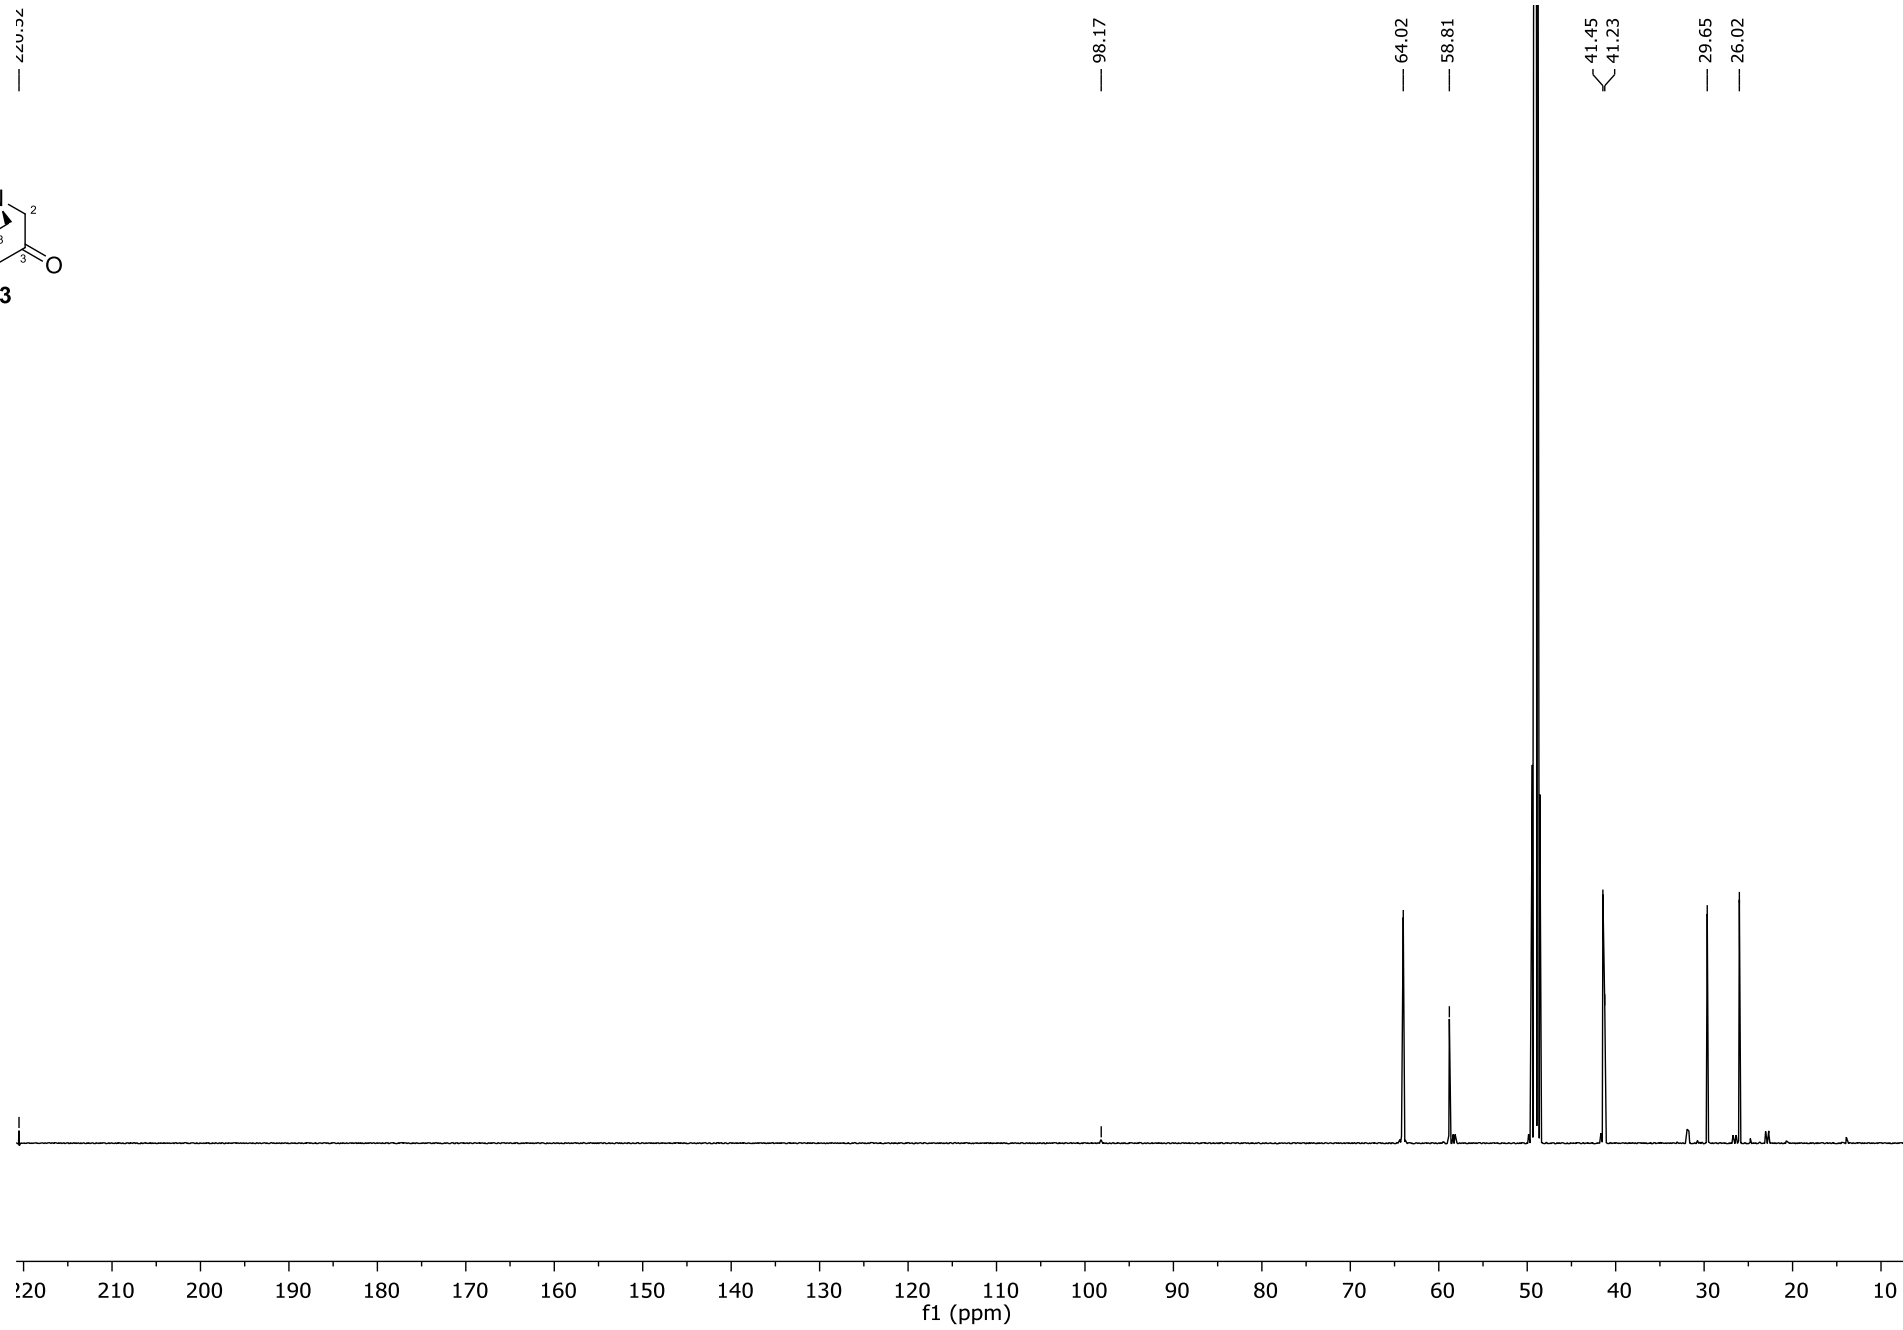

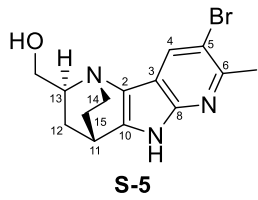

316

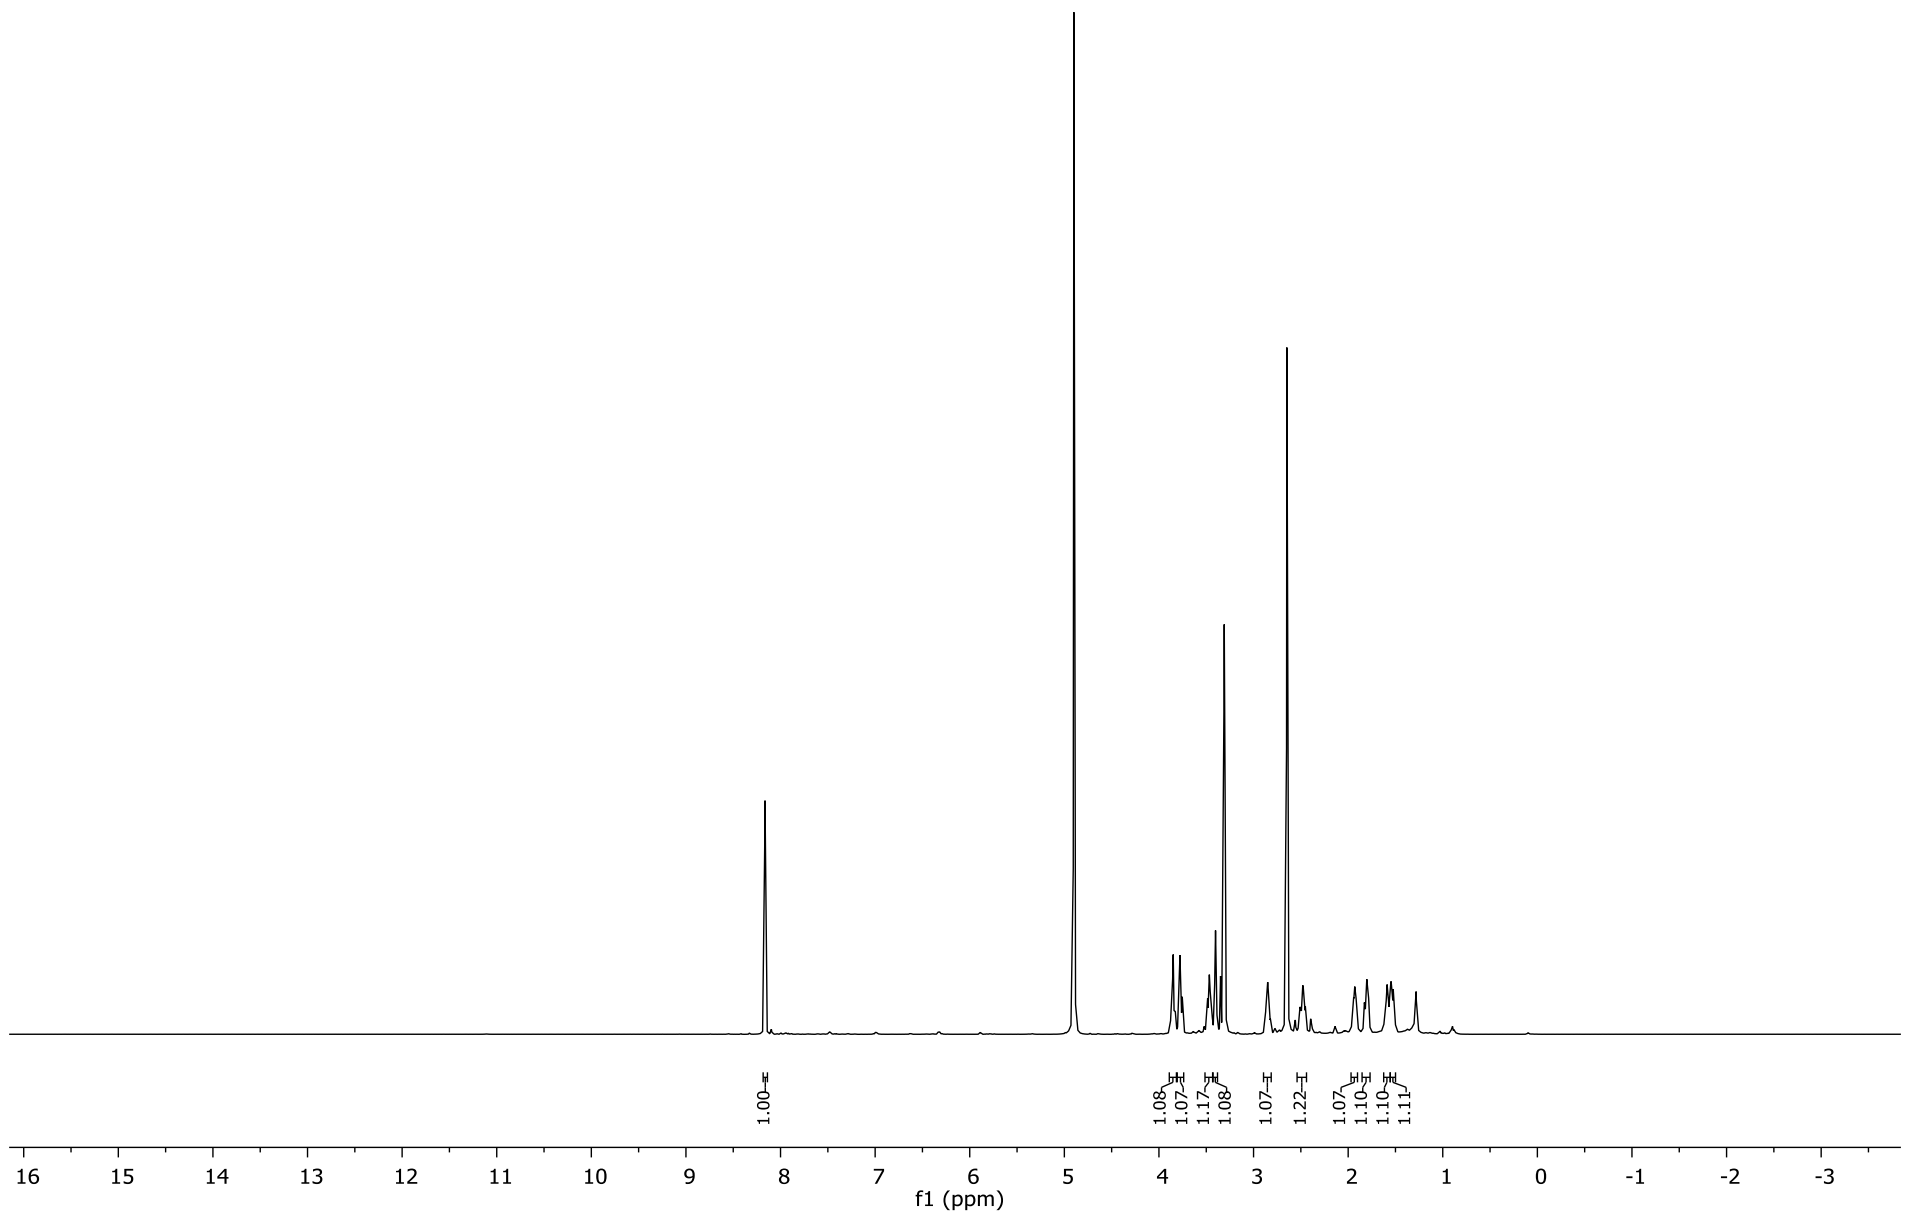

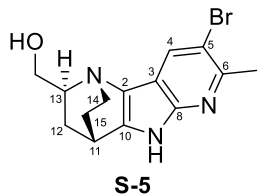

317

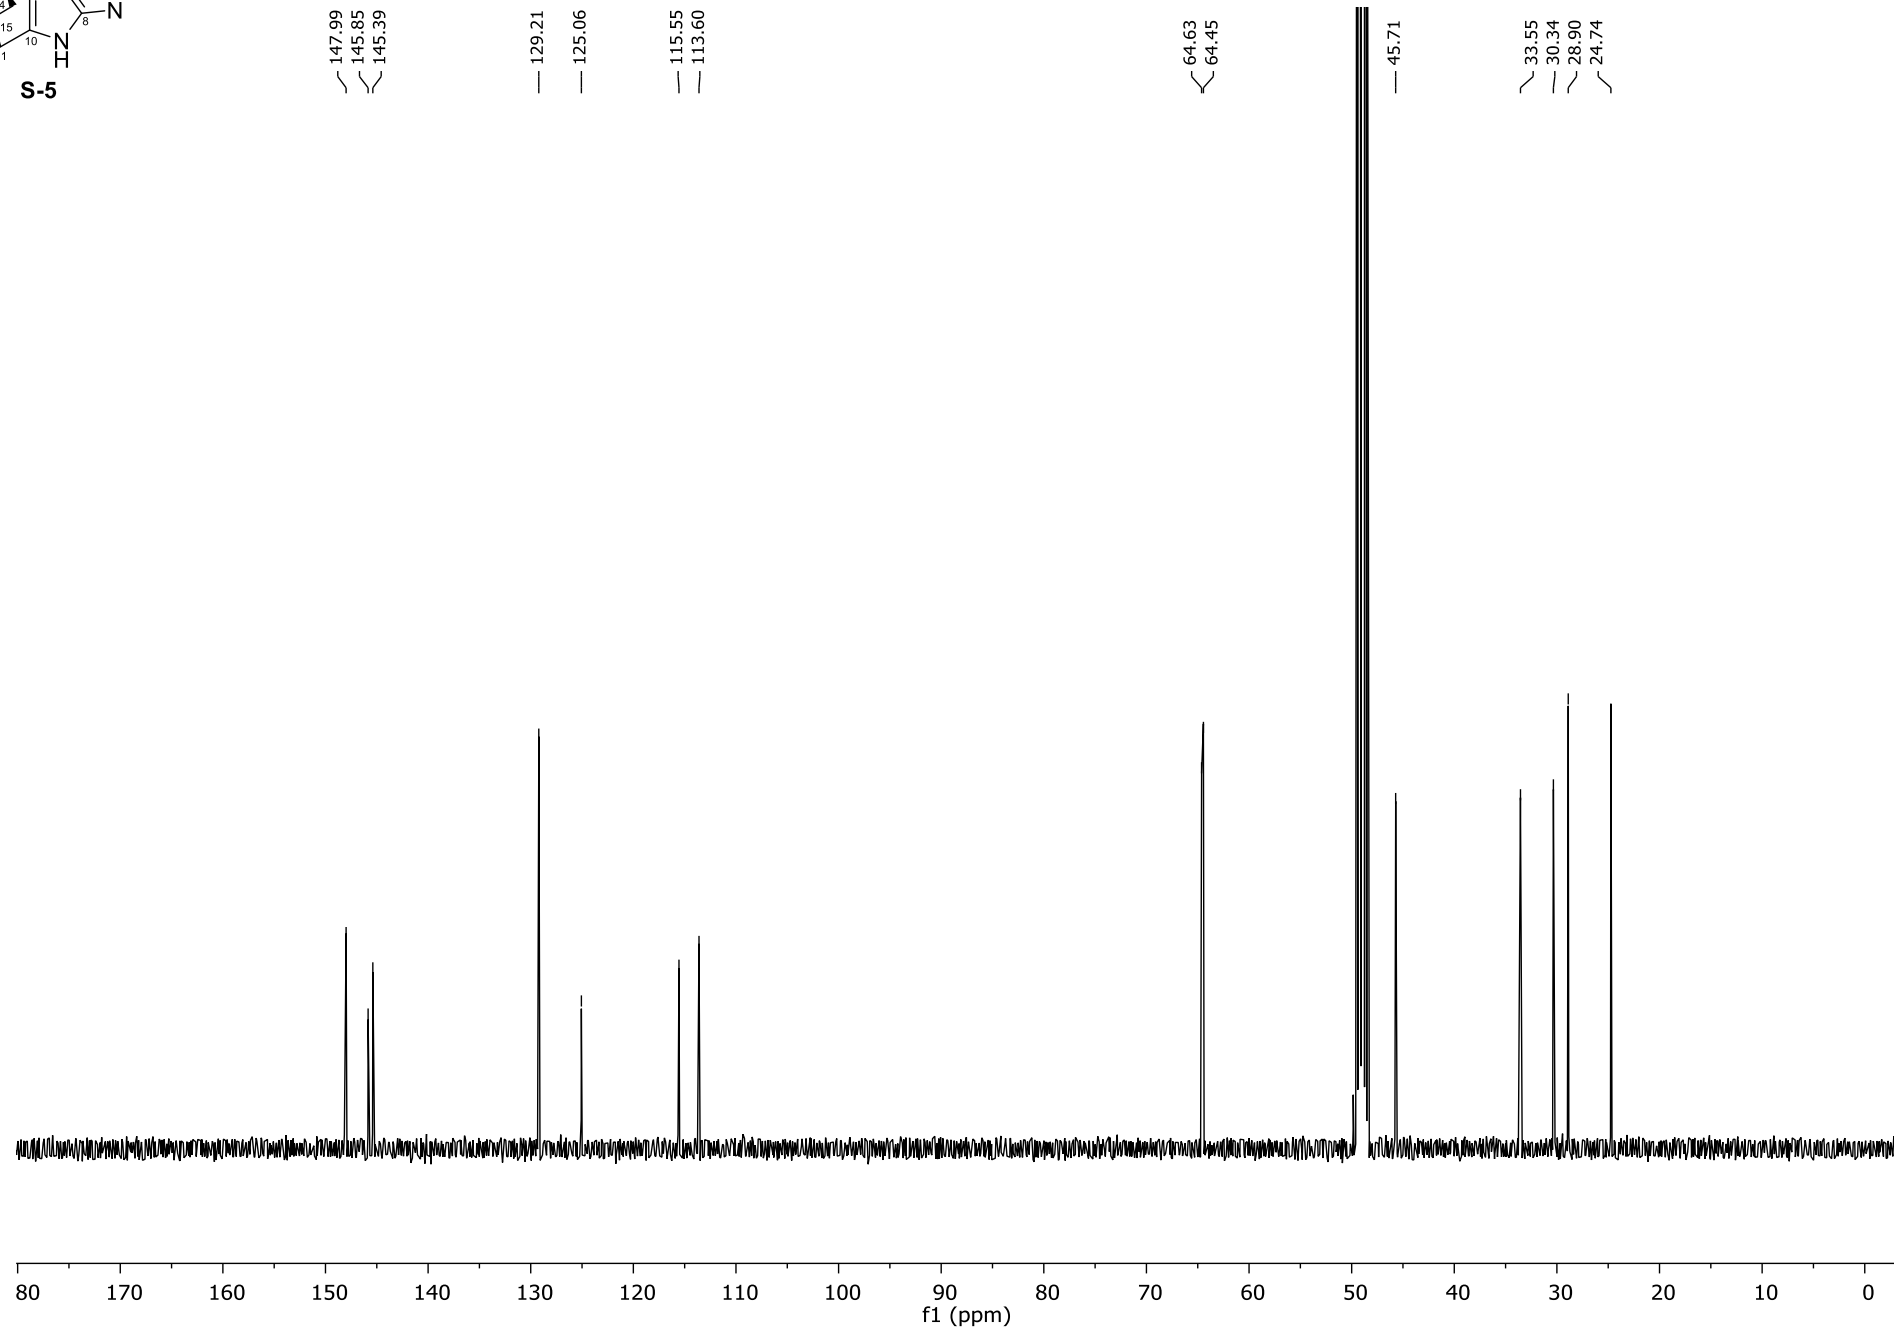

318

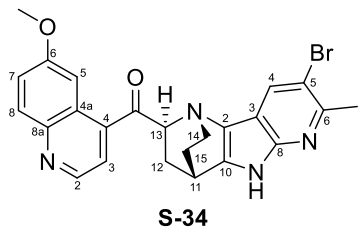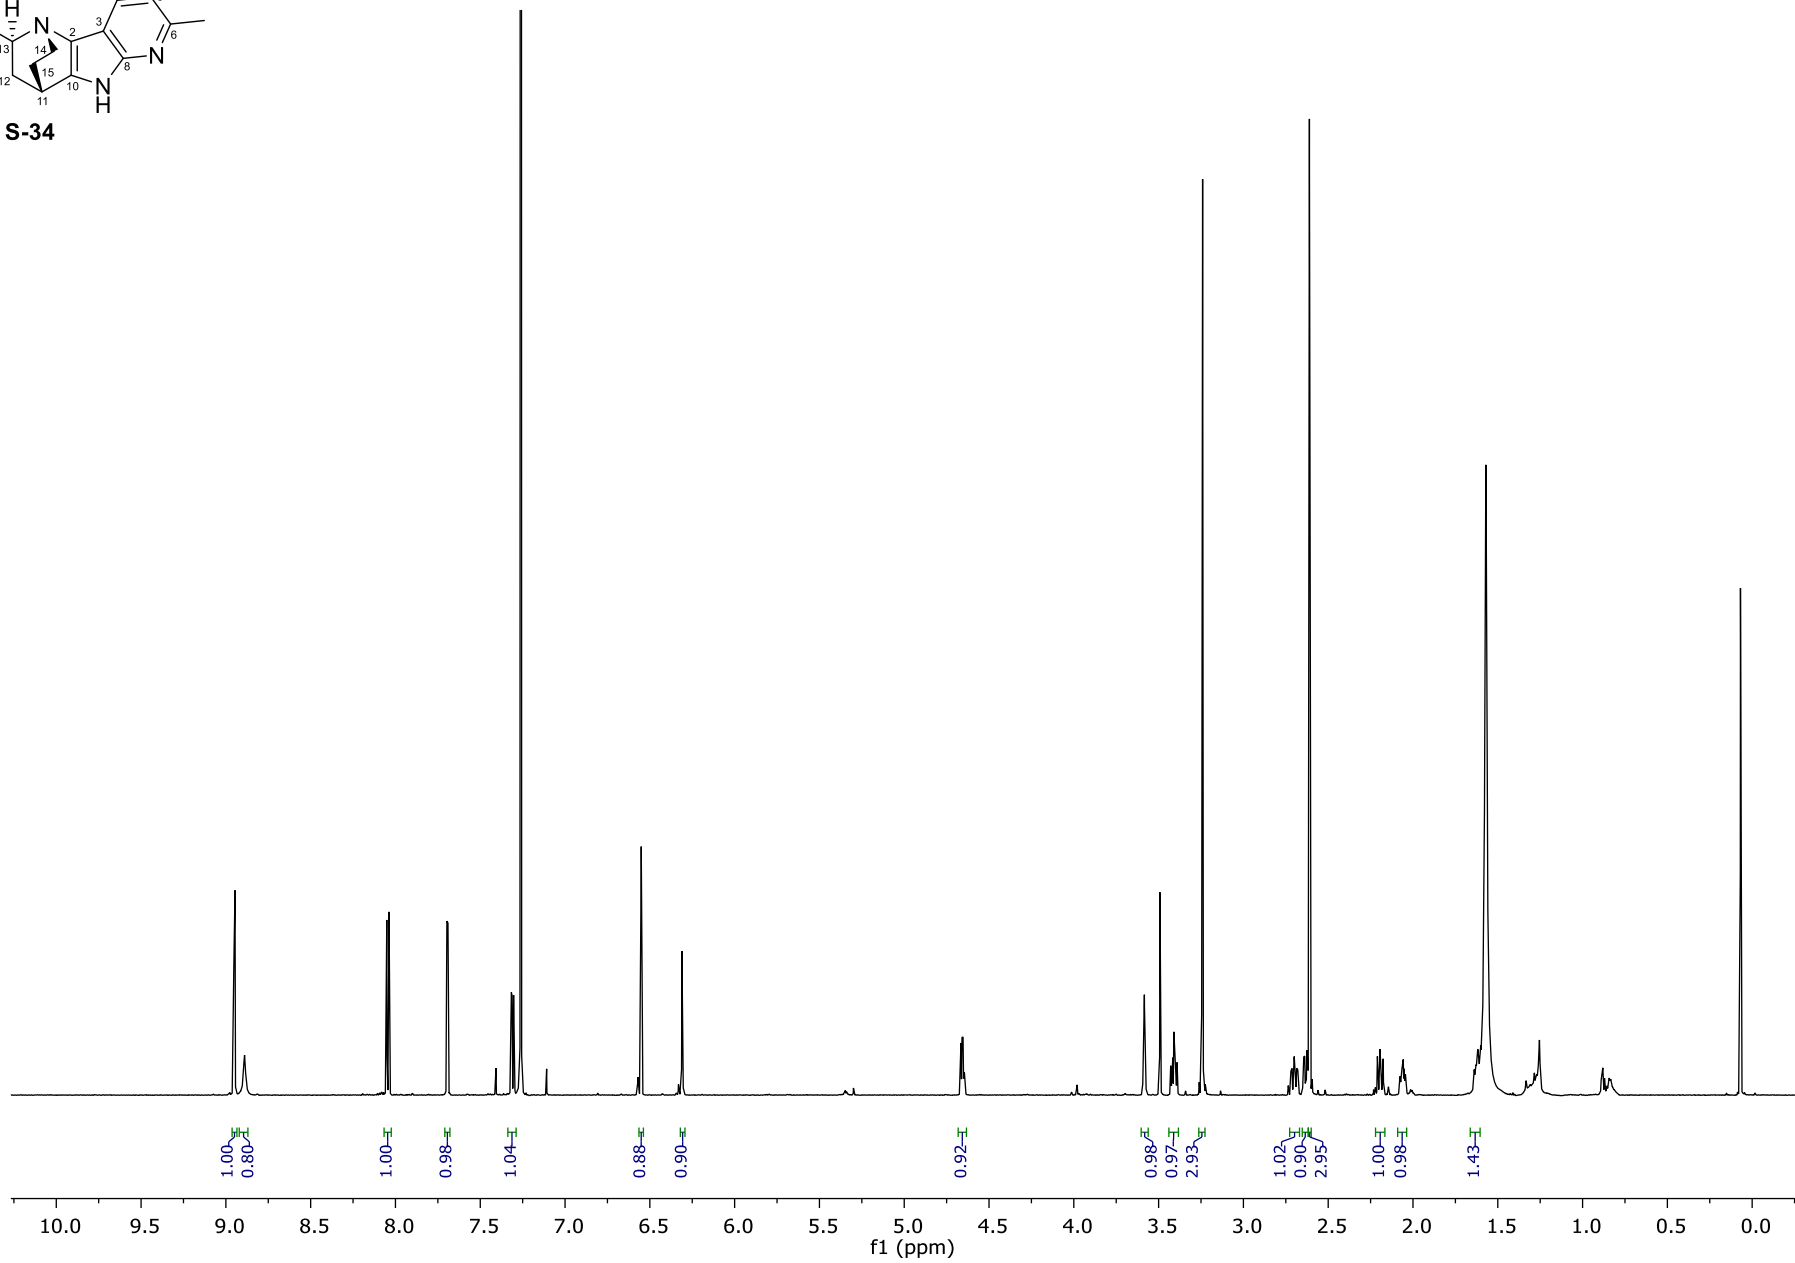

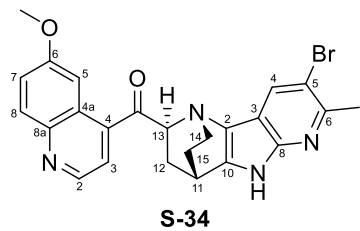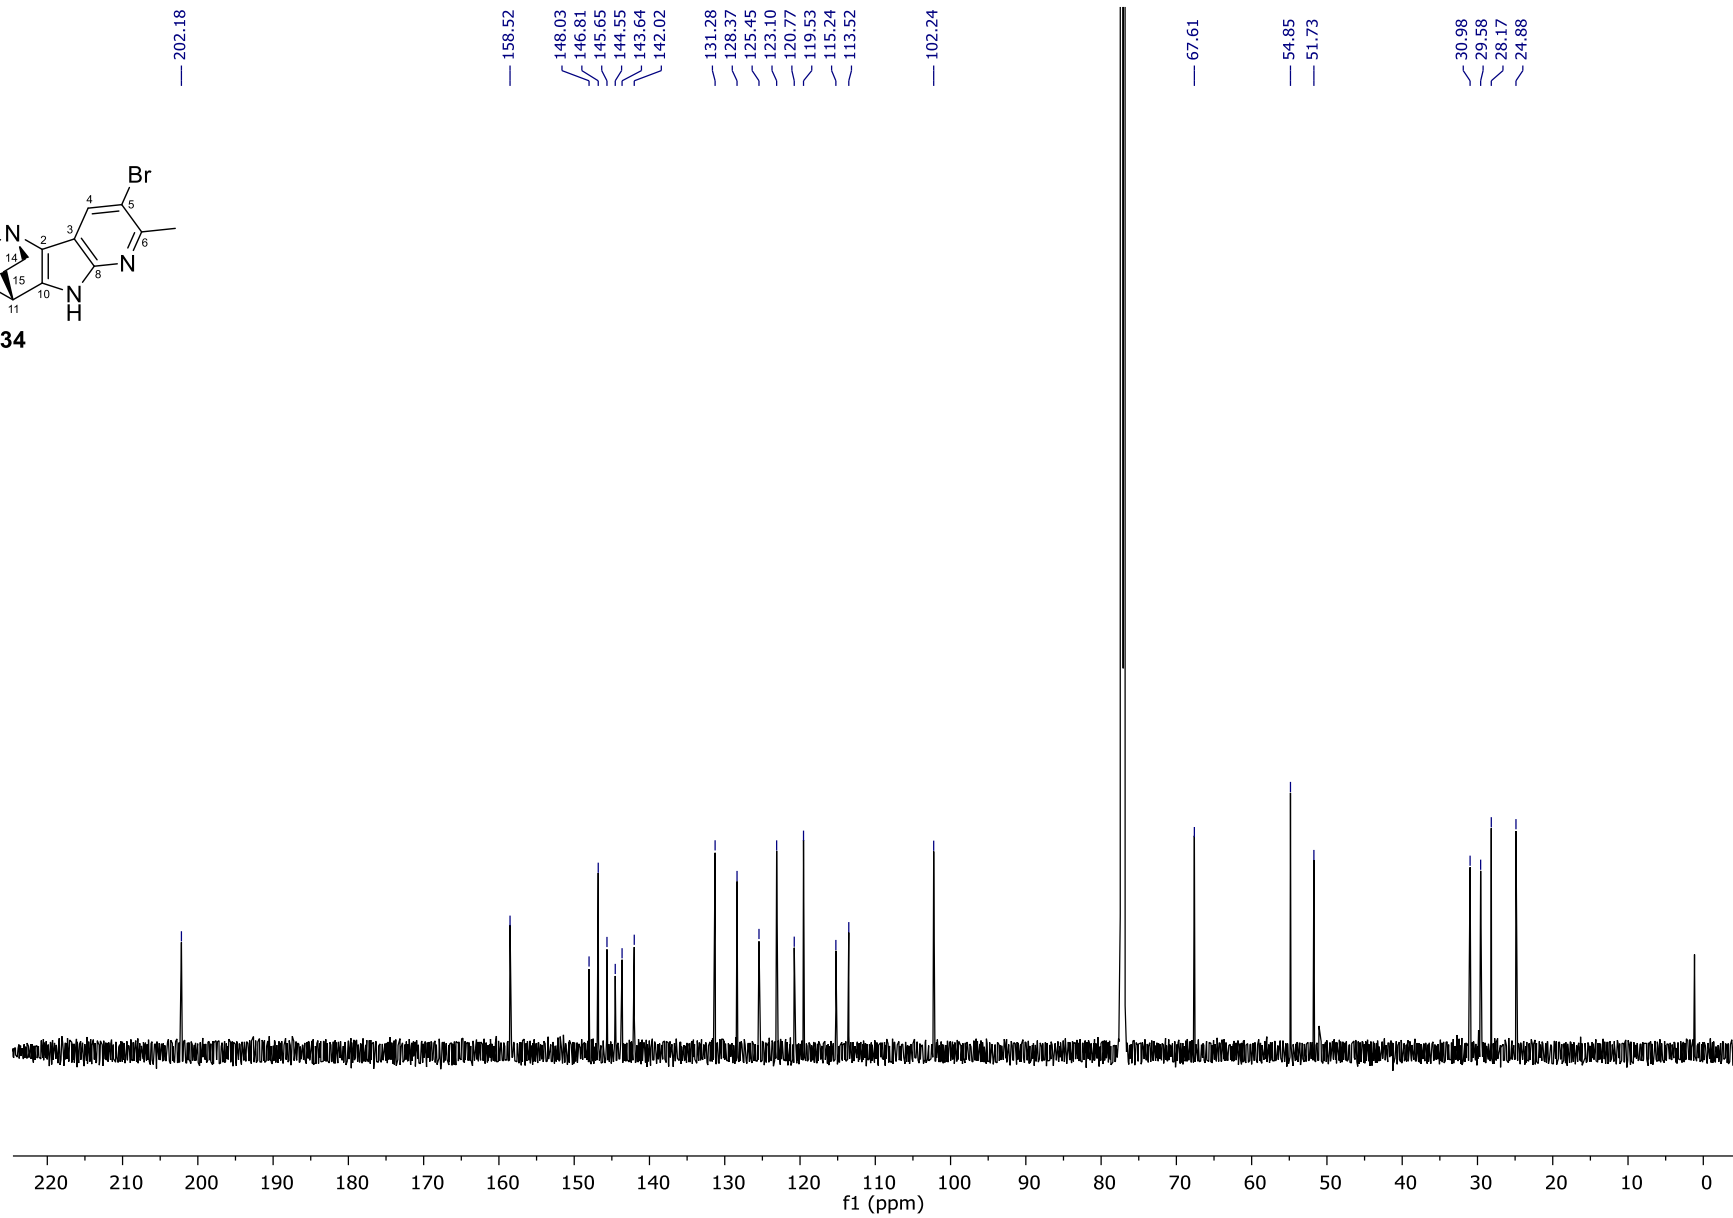



## 8.0 References

- [1] L. Kremer, E. Hennes, A. Brause, A. Ursu, L. Robke, H. T. Matsubayashi, Y. Nihongaki, J. Flegel, I. Mejdrová, J. Eickhoff, et al., *Angew. Chem. Int. Ed.* **2019**, *58*, 16617–16628.
- [2] L. Robke, Y. Futamura, G. Konstantinidis, J. Wilke, H. Aono, Z. Mahmoud, N. Watanabe, Y.-W. Wu, H. Osada, L. Laraia, et al., *Chem. Sci.* **2018**, *9*, 3014–3022.
- [3] A. S. Rosenthal, C. Tanega, M. Shen, B. T. Mott, J. M. Bougie, D.-T. Nguyen, T. Misteli, D. S. Auld, D. J. Maloney, C. J. Thomas, *An Inhibitor of the Cdc2-like Kinase 4 (Clk4)*, National Center For Biotechnology Information (US), **2010**.  
<https://www.ncbi.nlm.nih.gov/books/NBK56236/>
- [4] “AID 2710 - Kinase Inhibition Profile Study on Inhibitors of CDC-like Kinase 4 - PubChem,” can be found under <https://pubchem.ncbi.nlm.nih.gov/bioassay/2710>.
- [5] M. Muraki, B. Ohkawara, T. Hosoya, H. Onogi, J. Koizumi, T. Koizumi, K. Sumi, J. Yomoda, M. V. Murray, H. Kimura, et al., *J. Biol. Chem.* **2004**, *279*, 24246–24254.
- [6] A. Foucourt, D. Hédou, C. Dubouilh-Benard, A. Girard, T. Taverne, A. S. Casagrande, L. Désiré, B. Leblond, T. Besson, *Molecules* **2014**, *19*, 15411–15439.
- [7] K. J. French, Y. Zhuang, L. W. Maines, P. Gao, W. Wang, V. Beljanski, J. J. Upson, C. L. Green, S. N. Keller, C. D. Smith, *J. Pharmacol. Exp. Ther.* **2010**, *333*, 129–39.
- [8] M. E. Schnute, M. D. McReynolds, T. Kasten, M. Yates, G. Jerome, J. W. Rains, T. Hall, J. Chrencik, M. Kraus, C. N. Cronin, et al., *Biochem. J.* **2012**, *444*, 79–88.
- [9] C. Sadhu, B. Masinovsky, K. Dick, C. G. Sowell, D. E. Staunton, *J. Immunol.* **2003**, *170*, 2647–54.
- [10] B. J. Lannutti, S. A. Meadows, S. E. M. Herman, A. Kashishian, B. Steiner, A. J. Johnson, J. C. Byrd, J. W. Tyner, M. M. Loriaux, M. Deininger, et al., *Blood* **2011**, *117*, 591–4.
- [11] K. Down, A. Amour, I. R. Baldwin, A. W. J. Cooper, A. M. Deakin, L. M. Felton, S. B. Guntrip, C. Hardy, Z. A. Harrison, K. L. Jones, et al., *J. Med. Chem.* **2015**, *58*, 7381–7399.
- [12] P. Ertl, S. Roggo, A. Schuffenhauer, *J. Chem. Inf. Model.* **2008**, *48*, 68–74.
- [13] I. Colomer, C. J. Empson, P. Craven, Z. Owen, R. G. Doveston, I. Churcher, S. P. Marsden, A. Nelson, *Chem. Commun.* **2016**, *52*, 7209–7212.
- [14] M. A. Bray, S. Singh, H. Han, C. T. Davis, B. Borgeson, C. Hartland, M. Kost-Alimova, S. M. Gustafsdottir, C. C. Gibson, A. E. Carpenter, *Nat. Protoc.* **2016**, *11*, 1757–1774.
- [15] M. H. Woehrmann, W. M. Bray, J. K. Durbin, S. C. Nisam, A. K. Michael, E. Glassey, J. M. Stuart, R. S. Lokey, *Mol. Biosyst.* **2013**, *9*, 2604–2617.
- [16] A. Pahl, S. Sievers, in *Methods Mol. Biol.*, Humana Press, New York, NY, **2019**, pp. 115–126.
- [17] <https://github.com/mpimp-comas/cellpainting>. Last visited 18/02/2020.
- [18] L. Laraia, K. Ohsawa, G. Konstantinidis, L. Robke, Y. W. Wu, K. Kumar, H. Waldmann,

*Angew. Chem. Int. Ed.* **2017**, *56*, 2145–2150.

- [19] H. Waldmann, L. Laraia, G. Garivet, D. J. Foley, N. Kaiser, S. Müller, S. Zinken, T. Pinkert, J. Wilke, D. Corkery, et al., *Angew. Chem. Int. Ed.* **2019**, DOI 10.1002/anie.201913712.
- [20] L. Robke, L. Laraia, M. A. Carnero Corrales, G. Konstantinidis, M. Muroi, A. Richters, M. Winzker, T. Engbring, S. Tomassi, N. Watanabe, et al., *Angew. Chem. Int. Ed.* **2017**, *56*, 8153–8157.
- [21] L. Robke, T. Rodrigues, P. Schröder, D. J. Foley, G. J. L. Bernardes, L. Laraia, H. Waldmann, *Tetrahedron* **2018**, *74*, DOI 10.1016/j.tet.2018.07.021.
- [22] L. Laraia, A. Friese, D. P. Corkery, G. Konstantinidis, N. Erwin, W. Hofer, H. Karatas, L. Klewer, A. Brockmeyer, M. Metz, et al., *Nat. Chem. Biol.* **2019**, *15*, 710–720.
- [23] F. De Chaumont, S. Dallongeville, N. Chenouard, N. Hervé, S. Pop, T. Provoost, V. Meas-Yedid, P. Pankajakshan, T. Lecomte, Y. Le Montagner, et al., *Nat. Methods* **2012**, *9*, 690–696.
- [24] D. E. Portlock, D. Naskar, L. West, W. L. Seibel, T. Gu, H. J. Krauss, X. S. Peng, P. M. Dybas, E. G. Soyke, S. B. Ashton, et al., *Tetrahedron Lett.* **2003**, *44*, 5365–5368.
- [25] F. I. Carroll, P. Abraham, K. Gaetano, S. W. Mascarella, R. A. Wohl, J. Lind, K. Petzoldt, *J. Chem. Soc. Perkin Trans. 1* **1991**, 3017–3026.
- [26] C. Chen, D. R. Lieberman, R. D. Larsen, T. R. Verhoeven, P. J. Reider, *J. Org. Chem.* **1997**, *62*, 2676–2677.
